# Supplementary material
Source: PubMed Central journal article supplement (PMC8940682)
Supplement: NIHMS1773905-supplement-13.pdf [file NIHMS1773905-supplement-13.pdf]

**Supplemental Table 1. Gene Expression Fold Change in B cells of control vs m28 treated tumors**

| gene_name | p_val      | avg_log2FC | pct.1 | pct.2 | p_val_adj  | cluster | gene     | pct.diff |
|-----------|------------|------------|-------|-------|------------|---------|----------|----------|
| Gapdh     | 1.1979E-08 | 1.1988531  | 0.884 | 0.632 | 0.00037198 | CTRL    | Gapdh    | 0.252    |
| Dct       | 2.1953E-07 | 1.69690134 | 0.651 | 0.273 | 0.00681701 | CTRL    | Dct      | 0.378    |
| Mt2       | 7.3061E-07 | 2.95161381 | 0.256 | 0.041 | 0.02268756 | CTRL    | Mt2      | 0.215    |
| Smyd2     | 5.5033E-06 | 6.75039468 | 0.093 | 0     | 0.17089371 | CTRL    | Smyd2    | 0.093    |
| Pmel      | 2.2931E-05 | 1.222944   | 0.558 | 0.255 | 0.71207827 | CTRL    | Pmel     | 0.303    |
| Cdc27     | 8.6097E-05 | 6.67236129 | 0.07  | 0     |            | 1 CTRL  | Cdc27    | 0.07     |
| Rbm43     | 8.6097E-05 | 5.36740375 | 0.07  | 0     |            | 1 CTRL  | Rbm43    | 0.07     |
| Fam98b    | 9.9454E-05 | 4.81335261 | 0.093 | 0.005 |            | 1 CTRL  | Fam98b   | 0.088    |
| Uhrf1     | 0.00010733 | 4.19070217 | 0.093 | 0.005 |            | 1 CTRL  | Uhrf1    | 0.088    |
| Fkbp5     | 0.00028478 | 3.66586203 | 0.116 | 0.014 |            | 1 CTRL  | Fkbp5    | 0.102    |
| Snx30     | 0.000356   | 3.33182095 | 0.14  | 0.023 |            | 1 CTRL  | Snx30    | 0.117    |
| Cited1    | 0.00036741 | 3.11037637 | 0.116 | 0.014 |            | 1 CTRL  | Cited1   | 0.102    |
| Ctsl      | 0.00039476 | 2.21028307 | 0.186 | 0.041 |            | 1 CTRL  | Ctsl     | 0.145    |
| Pebp1     | 0.00050276 | 1.88868983 | 0.302 | 0.114 |            | 1 CTRL  | Pebp1    | 0.188    |
| Cdpf1     | 0.00070949 | 4.37213181 | 0.093 | 0.009 |            | 1 CTRL  | Cdpf1    | 0.084    |
| Exoc3     | 0.00077813 | 3.28629055 | 0.093 | 0.009 |            | 1 CTRL  | Exoc3    | 0.084    |
| Ide       | 0.00077813 | 3.14958093 | 0.093 | 0.009 |            | 1 CTRL  | Ide      | 0.084    |
| Aldoa     | 0.00077894 | 1.2001344  | 0.581 | 0.359 |            | 1 CTRL  | Aldoa    | 0.222    |
| mt-Atp8   | 0.00092304 | 1.27012724 | 0.651 | 0.505 |            | 1 CTRL  | mt-Atp8  | 0.146    |
| Idh2      | 0.00103202 | 3.62682009 | 0.116 | 0.018 |            | 1 CTRL  | Idh2     | 0.098    |
| Tnrc6a    | 0.00118344 | 2.27323975 | 0.186 | 0.05  |            | 1 CTRL  | Tnrc6a   | 0.136    |
| Syvn1     | 0.00125547 | 2.55423024 | 0.116 | 0.018 |            | 1 CTRL  | Syvn1    | 0.098    |
| Dclre1c   | 0.00137252 | 5.3977325  | 0.07  | 0.005 |            | 1 CTRL  | Dclre1c  | 0.065    |
| Snx16     | 0.00137252 | 5.24404612 | 0.07  | 0.005 |            | 1 CTRL  | Snx16    | 0.065    |
| Ap3s2     | 0.00137252 | 4.44215768 | 0.07  | 0.005 |            | 1 CTRL  | Ap3s2    | 0.065    |
| Ap4s1     | 0.00137252 | 4.3780701  | 0.07  | 0.005 |            | 1 CTRL  | Ap4s1    | 0.065    |
| Fam198b   | 0.00138551 | 6.79935465 | 0.047 | 0     |            | 1 CTRL  | Fam198b  | 0.047    |
| Gm26870   | 0.00138551 | 6.22148913 | 0.047 | 0     |            | 1 CTRL  | Gm26870  | 0.047    |
| Nat6      | 0.00138551 | 6.14140262 | 0.047 | 0     |            | 1 CTRL  | Nat6     | 0.047    |
| Ddx20     | 0.00138551 | 6.1325564  | 0.047 | 0     |            | 1 CTRL  | Ddx20    | 0.047    |
| Elk3      | 0.00138551 | 6.12003548 | 0.047 | 0     |            | 1 CTRL  | Elk3     | 0.047    |
| Abca3     | 0.00138551 | 6.10620035 | 0.047 | 0     |            | 1 CTRL  | Abca3    | 0.047    |
| Mylk      | 0.00138551 | 6.07291771 | 0.047 | 0     |            | 1 CTRL  | Mylk     | 0.047    |
| Ipo4      | 0.00138551 | 6.0664304  | 0.047 | 0     |            | 1 CTRL  | Ipo4     | 0.047    |
| Enkd1     | 0.00138551 | 6.04105732 | 0.047 | 0     |            | 1 CTRL  | Enkd1    | 0.047    |
| Katnb1    | 0.00138551 | 6.03827135 | 0.047 | 0     |            | 1 CTRL  | Katnb1   | 0.047    |
| Nudt16l1  | 0.00138551 | 5.99889099 | 0.047 | 0     |            | 1 CTRL  | Nudt16l1 | 0.047    |
| Psph      | 0.00138551 | 5.9965291  | 0.047 | 0     |            | 1 CTRL  | Psph     | 0.047    |
| Btd       | 0.00138551 | 5.93362627 | 0.047 | 0     |            | 1 CTRL  | Btd      | 0.047    |
| Ddx59     | 0.00138551 | 5.8991183  | 0.047 | 0     |            | 1 CTRL  | Ddx59    | 0.047    |
| Mpdz      | 0.00138551 | 5.86275312 | 0.047 | 0     |            | 1 CTRL  | Mpdz     | 0.047    |
| Abcc5     | 0.00138551 | 5.81218474 | 0.047 | 0     |            | 1 CTRL  | Abcc5    | 0.047    |
| Gm15853   | 0.00138551 | 5.75218271 | 0.047 | 0     |            | 1 CTRL  | Gm15853  | 0.047    |
| Selenbp1  | 0.00138551 | 5.7118245  | 0.047 | 0     |            | 1 CTRL  | Selenbp1 | 0.047    |
| Ptdss2    | 0.00138551 | 5.7118245  | 0.047 | 0     |            | 1 CTRL  | Ptdss2   | 0.047    |
| Asb5      | 0.00138551 | 5.62752332 | 0.047 | 0     |            | 1 CTRL  | Asb5     | 0.047    |
| Nfatc2ip  | 0.00138551 | 5.62130683 | 0.047 | 0     |            | 1 CTRL  | Nfatc2ip | 0.047    |
| Gm42670   | 0.00138551 | 5.55110128 | 0.047 | 0     |            | 1 CTRL  | Gm42670  | 0.047    |

|             |            |            |       |       |        |           |       |
|-------------|------------|------------|-------|-------|--------|-----------|-------|
| Gmgs        | 0.00138551 | 5.55110128 | 0.047 | 0     | 1 CTRL | Gmgs      | 0.047 |
| Spns3       | 0.00138551 | 5.51299549 | 0.047 | 0     | 1 CTRL | Spns3     | 0.047 |
| Nrp2        | 0.00138551 | 5.48748035 | 0.047 | 0     | 1 CTRL | Nrp2      | 0.047 |
| Ppp1r13b    | 0.00138551 | 5.40689708 | 0.047 | 0     | 1 CTRL | Ppp1r13b  | 0.047 |
| Atg7        | 0.00138551 | 5.38086794 | 0.047 | 0     | 1 CTRL | Atg7      | 0.047 |
| Rin3        | 0.00138551 | 5.28714923 | 0.047 | 0     | 1 CTRL | Rin3      | 0.047 |
| Parp10      | 0.00138551 | 5.2298983  | 0.047 | 0     | 1 CTRL | Parp10    | 0.047 |
| Dclre1b     | 0.00138551 | 4.88668864 | 0.047 | 0     | 1 CTRL | Dclre1b   | 0.047 |
| Cavin1      | 0.00138551 | 4.761112   | 0.047 | 0     | 1 CTRL | Cavin1    | 0.047 |
| Ceacam1     | 0.00142259 | 4.20234338 | 0.07  | 0.005 | 1 CTRL | Ceacam1   | 0.065 |
| 4930453N24R | 0.00142259 | 3.96826219 | 0.07  | 0.005 | 1 CTRL | 4930453N2 | 0.065 |
| Sox10       | 0.00142259 | 3.84857063 | 0.07  | 0.005 | 1 CTRL | Sox10     | 0.065 |
| Arfgef3     | 0.00142259 | 3.72635395 | 0.07  | 0.005 | 1 CTRL | Arfgef3   | 0.065 |
| Alad        | 0.00142259 | 3.60533217 | 0.07  | 0.005 | 1 CTRL | Alad      | 0.065 |
| 1810043G02R | 0.00142259 | 3.4581428  | 0.07  | 0.005 | 1 CTRL | 1810043GC | 0.065 |
| Spats2      | 0.00147434 | 3.83186911 | 0.07  | 0.005 | 1 CTRL | Spats2    | 0.065 |
| Mrpl46      | 0.00147434 | 3.36067071 | 0.07  | 0.005 | 1 CTRL | Mrpl46    | 0.065 |
| Slc35c2     | 0.00147434 | 3.34684165 | 0.07  | 0.005 | 1 CTRL | Slc35c2   | 0.065 |
| Cox7b       | 0.00189255 | 1.612894   | 0.326 | 0.15  | 1 CTRL | Cox7b     | 0.176 |
| Crlf2       | 0.00236182 | 1.96049095 | 0.186 | 0.055 | 1 CTRL | Crlf2     | 0.131 |
| Ptgds       | 0.00245071 | 1.48934907 | 0.279 | 0.118 | 1 CTRL | Ptgds     | 0.161 |
| Tyrp1       | 0.00268586 | 1.53346538 | 0.372 | 0.195 | 1 CTRL | Tyrp1     | 0.177 |
| Atg4b       | 0.0027418  | 3.87389886 | 0.093 | 0.014 | 1 CTRL | Atg4b     | 0.079 |
| Zfp445      | 0.00275757 | 2.87188097 | 0.116 | 0.023 | 1 CTRL | Zfp445    | 0.093 |
| Tpi1        | 0.00297516 | 1.31421539 | 0.372 | 0.182 | 1 CTRL | Tpi1      | 0.19  |
| Utp3        | 0.0030064  | 2.67624687 | 0.116 | 0.023 | 1 CTRL | Utp3      | 0.093 |
| Hsd17b12    | 0.00303819 | 2.87161782 | 0.093 | 0.014 | 1 CTRL | Hsd17b12  | 0.079 |
| Ubald1      | 0.00319709 | 2.60247315 | 0.093 | 0.014 | 1 CTRL | Ubald1    | 0.079 |
| AW112010    | 0.00327556 | 2.75197717 | 0.116 | 0.023 | 1 CTRL | AW112010  | 0.093 |
| Slc25a4     | 0.00329761 | 1.26877563 | 0.372 | 0.195 | 1 CTRL | Slc25a4   | 0.177 |
| Nsrp1       | 0.00336353 | 2.31295053 | 0.093 | 0.014 | 1 CTRL | Nsrp1     | 0.079 |
| Ccdc117     | 0.00344967 | 2.34830555 | 0.093 | 0.014 | 1 CTRL | Ccdc117   | 0.079 |
| Met         | 0.00344967 | 2.30943807 | 0.093 | 0.014 | 1 CTRL | Met       | 0.079 |
| Safb        | 0.00345504 | 2.02164531 | 0.186 | 0.059 | 1 CTRL | Safb      | 0.127 |
| Ndufv3      | 0.00392563 | 1.80410804 | 0.209 | 0.073 | 1 CTRL | Ndufv3    | 0.136 |
| Snrnp48     | 0.00407373 | 1.93095736 | 0.163 | 0.045 | 1 CTRL | Snrnp48   | 0.118 |
| Ebf1        | 0.00440394 | 0.78469351 | 0.767 | 0.659 | 1 CTRL | Ebf1      | 0.108 |
| Nolc1       | 0.00447459 | 2.41664444 | 0.14  | 0.036 | 1 CTRL | Nolc1     | 0.104 |
| Mt1         | 0.00461445 | 1.21773581 | 0.395 | 0.218 | 1 CTRL | Mt1       | 0.177 |
| AY036118    | 0.00515498 | 0.85523278 | 0.698 | 0.586 | 1 CTRL | AY036118  | 0.112 |
| Zfp36l2     | 0.00587722 | 1.34827246 | 0.302 | 0.145 | 1 CTRL | Zfp36l2   | 0.157 |
| Exosc3      | 0.00603306 | 2.71677162 | 0.116 | 0.027 | 1 CTRL | Exosc3    | 0.089 |
| Pgk1        | 0.00700299 | 1.01930243 | 0.419 | 0.25  | 1 CTRL | Pgk1      | 0.169 |
| Arl2bp      | 0.00730129 | 2.14494923 | 0.116 | 0.027 | 1 CTRL | Arl2bp    | 0.089 |
| Tnk2        | 0.00730425 | 3.8203413  | 0.07  | 0.009 | 1 CTRL | Tnk2      | 0.061 |
| Tpd5211     | 0.00730425 | 3.29728463 | 0.07  | 0.009 | 1 CTRL | Tpd5211   | 0.061 |
| Alkbh6      | 0.00730425 | 3.29303138 | 0.07  | 0.009 | 1 CTRL | Alkbh6    | 0.061 |
| Supt4a      | 0.00738631 | 1.27606107 | 0.349 | 0.2   | 1 CTRL | Supt4a    | 0.149 |
| ldh3a       | 0.00750915 | 3.58218421 | 0.07  | 0.009 | 1 CTRL | ldh3a     | 0.061 |
| Simc1       | 0.00750915 | 3.41927291 | 0.07  | 0.009 | 1 CTRL | Simc1     | 0.061 |

|          |            |            |       |       |                |          |       |
|----------|------------|------------|-------|-------|----------------|----------|-------|
| Cdc42ep3 | 0.00750915 | 3.120206   | 0.07  | 0.009 | 1 CTRL         | Cdc42ep3 | 0.061 |
| Cd302    | 0.00771919 | 3.20627088 | 0.07  | 0.009 | 1 CTRL         | Cd302    | 0.061 |
| Rspry1   | 0.00771919 | 3.0015439  | 0.07  | 0.009 | 1 CTRL         | Rspry1   | 0.061 |
| Bicra    | 0.00771919 | 2.97148306 | 0.07  | 0.009 | 1 CTRL         | Bicra    | 0.061 |
| Eps8     | 0.00772587 | 2.09362018 | 0.116 | 0.027 | 1 CTRL         | Eps8     | 0.089 |
| Cd63     | 0.00784414 | 1.28946017 | 0.302 | 0.141 | 1 CTRL         | Cd63     | 0.161 |
| Mfap1a   | 0.00790317 | 2.75422118 | 0.093 | 0.018 | 1 CTRL         | Mfap1a   | 0.075 |
| Edem3    | 0.00793448 | 3.03568053 | 0.07  | 0.009 | 1 CTRL         | Edem3    | 0.061 |
| Med16    | 0.00793448 | 2.89362919 | 0.07  | 0.009 | 1 CTRL         | Med16    | 0.061 |
| Gstm2    | 0.00793448 | 2.86897662 | 0.07  | 0.009 | 1 CTRL         | Gstm2    | 0.061 |
| Setd1a   | 0.00793448 | 2.85194454 | 0.07  | 0.009 | 1 CTRL         | Setd1a   | 0.061 |
| Arf2     | 0.00793448 | 2.68030681 | 0.07  | 0.009 | 1 CTRL         | Arf2     | 0.061 |
| Nle1     | 0.00793448 | 2.61636823 | 0.07  | 0.009 | 1 CTRL         | Nle1     | 0.061 |
| Ldhb     | 0.00807756 | 2.74470766 | 0.093 | 0.018 | 1 CTRL         | Ldhb     | 0.075 |
| Saal1    | 0.00815512 | 2.66649152 | 0.07  | 0.009 | 1 CTRL         | Saal1    | 0.061 |
| Ptges2   | 0.00815512 | 2.5268279  | 0.07  | 0.009 | 1 CTRL         | Ptges2   | 0.061 |
| Cntrl    | 0.00817244 | 2.02393612 | 0.116 | 0.027 | 1 CTRL         | Cntrl    | 0.089 |
| Ruvbl1   | 0.00825538 | 2.91304087 | 0.093 | 0.018 | 1 CTRL         | Ruvbl1   | 0.075 |
| Ldha     | 0.0084264  | 1.08237564 | 0.488 | 0.309 | 1 CTRL         | Ldha     | 0.179 |
| Pkn2     | 0.00843154 | 2.46707437 | 0.14  | 0.041 | 1 CTRL         | Pkn2     | 0.099 |
| Mettl9   | 0.0084367  | 2.80109029 | 0.093 | 0.018 | 1 CTRL         | Mettl9   | 0.075 |
| Rasgef1b | 0.0084367  | 2.76267947 | 0.093 | 0.018 | 1 CTRL         | Rasgef1b | 0.075 |
| Pigyl    | 0.0084367  | 2.60683545 | 0.093 | 0.018 | 1 CTRL         | Pigyl    | 0.075 |
| Fdps     | 0.0084367  | 2.46759655 | 0.093 | 0.018 | 1 CTRL         | Fdps     | 0.075 |
| Cd72     | 0.00848468 | 1.66244042 | 0.209 | 0.082 | 1 CTRL         | Cd72     | 0.127 |
| Zfp771   | 0.00862157 | 2.7360551  | 0.093 | 0.018 | 1 CTRL         | Zfp771   | 0.075 |
| Tspan3   | 0.00862157 | 2.68023502 | 0.093 | 0.018 | 1 CTRL         | Tspan3   | 0.075 |
| Iglc2    | 0.0086446  | 1.04210718 | 0.349 | 0.186 | 1 CTRL         | Iglc2    | 0.163 |
| Gm19951  | 0.00939778 | 2.07610856 | 0.093 | 0.018 | 1 CTRL         | Gm19951  | 0.075 |
| Mcmbp    | 0.00942875 | 2.18949456 | 0.14  | 0.041 | 1 CTRL         | Mcmbp    | 0.099 |
| Denr     | 0.00943879 | 2.03055733 | 0.163 | 0.055 | 1 CTRL         | Denr     | 0.108 |
| Otulin   | 0.00964077 | 1.47316581 | 0.209 | 0.082 | 1 CTRL         | Otulin   | 0.127 |
| Atp11b   | 0.00997151 | 1.68976739 | 0.186 | 0.068 | 1 CTRL         | Atp11b   | 0.118 |
| Tmsb4x   | 1.5648E-08 | 0.91247665 | 1     | 0.977 | 0.00048593 M28 | Tmsb4x   | 0.023 |
| Tgfb1    | 0.00062011 | 1.96631235 | 0.368 | 0.093 | 1 M28          | Tgfb1    | 0.275 |
| Cd79a    | 0.00094187 | 0.69770346 | 0.868 | 0.581 | 1 M28          | Cd79a    | 0.287 |
| Nfkb1    | 0.00108021 | 4.55083266 | 0.241 | 0.023 | 1 M28          | Nfkb1    | 0.218 |
| Gm47283  | 0.00139    | 2.19506296 | 0.314 | 0.07  | 1 M28          | Gm47283  | 0.244 |
| Cd52     | 0.00257879 | 0.9435628  | 0.655 | 0.326 | 1 M28          | Cd52     | 0.329 |
| Matr3    | 0.00481226 | 1.70868682 | 0.25  | 0.047 | 1 M28          | Matr3    | 0.203 |
| Ddx6     | 0.00518469 | 2.07683857 | 0.273 | 0.07  | 1 M28          | Ddx6     | 0.203 |
| Gnai2    | 0.006061   | 1.47918136 | 0.359 | 0.14  | 1 M28          | Gnai2    | 0.219 |
| Spib     | 0.00691155 | 3.16631823 | 0.191 | 0.023 | 1 M28          | Spib     | 0.168 |
| Ablim1   | 0.00692118 | 7.57609018 | 0.15  | 0     | 1 M28          | Ablim1   | 0.15  |
| Plac8    | 0.00696849 | 0.72282424 | 0.518 | 0.233 | 1 M28          | Plac8    | 0.285 |
| Vps37b   | 0.00983181 | 0.96746658 | 0.423 | 0.186 | 1 M28          | Vps37b   | 0.237 |
