# Supplementary material
Source: PubMed Central journal article supplement (PMC8940682)
Supplement: NIHMS1773905-supplement-14.pdf [file NIHMS1773905-supplement-14.pdf]

**Supplemental Table 2. Gene Expression Fold Change in CD4+ T cells of control vs m28 treated tumors**

| gene_name   | p_val       | avg_log2FC  | pct.1 | pct.2 | p_val_adj   | cluster | gene       | pct.diff |
|-------------|-------------|-------------|-------|-------|-------------|---------|------------|----------|
| Mt1         | 5.20787E-07 | 1.601374821 | 0.706 | 0.318 | 0.016171989 | CTRL    | Mt1        | 0.388    |
| Plk3        | 9.8746E-07  | 2.744449024 | 0.235 | 0.029 | 0.030663581 | CTRL    | Plk3       | 0.206    |
| Hbegf       | 4.16691E-06 | 4.243546896 | 0.118 | 0.004 | 0.129395027 | CTRL    | Hbegf      | 0.114    |
| Ptgds       | 3.21864E-05 | 1.854442378 | 0.382 | 0.117 | 0.999483655 | CTRL    | Ptgds      | 0.265    |
| Nkiras2     | 5.03092E-05 | 3.465361311 | 0.118 | 0.008 |             | 1 CTRL  | Nkiras2    | 0.11     |
| Cox11       | 5.43926E-05 | 3.303528568 | 0.118 | 0.008 |             | 1 CTRL  | Cox11      | 0.11     |
| Cd63        | 6.22592E-05 | 2.214983684 | 0.353 | 0.113 |             | 1 CTRL  | Cd63       | 0.24     |
| Cx3cr1      | 0.000133203 | 5.11751688  | 0.088 | 0.004 |             | 1 CTRL  | Cx3cr1     | 0.084    |
| Ogg1        | 0.000133203 | 5.112092848 | 0.088 | 0.004 |             | 1 CTRL  | Ogg1       | 0.084    |
| Myo7a       | 0.000139358 | 4.403683681 | 0.088 | 0.004 |             | 1 CTRL  | Myo7a      | 0.084    |
| Rhbdd2      | 0.000139358 | 4.27803501  | 0.088 | 0.004 |             | 1 CTRL  | Rhbdd2     | 0.084    |
| H6pd        | 0.000139358 | 4.033657597 | 0.088 | 0.004 |             | 1 CTRL  | H6pd       | 0.084    |
| Zfp628      | 0.000139358 | 3.80441184  | 0.088 | 0.004 |             | 1 CTRL  | Zfp628     | 0.084    |
| Srfbp1      | 0.000145779 | 3.867492895 | 0.088 | 0.004 |             | 1 CTRL  | Srfbp1     | 0.084    |
| Ednrb       | 0.000145779 | 3.715377728 | 0.088 | 0.004 |             | 1 CTRL  | Ednrb      | 0.084    |
| Fam234a     | 0.000145779 | 3.344137385 | 0.088 | 0.004 |             | 1 CTRL  | Fam234a    | 0.084    |
| Btbd9       | 0.000150307 | 2.816377621 | 0.176 | 0.029 |             | 1 CTRL  | Btbd9      | 0.147    |
| Trim7       | 0.000177869 | 7.136344478 | 0.059 | 0     |             | 1 CTRL  | Trim7      | 0.059    |
| Klhl15      | 0.000177869 | 5.401659119 | 0.059 | 0     |             | 1 CTRL  | Klhl15     | 0.059    |
| Zfp84       | 0.000177869 | 5.400199582 | 0.059 | 0     |             | 1 CTRL  | Zfp84      | 0.059    |
| Maoa        | 0.000177869 | 5.316926291 | 0.059 | 0     |             | 1 CTRL  | Maoa       | 0.059    |
| Fbxo44      | 0.000177869 | 5.21315181  | 0.059 | 0     |             | 1 CTRL  | Fbxo44     | 0.059    |
| Ccdc51      | 0.000177869 | 5.104549596 | 0.059 | 0     |             | 1 CTRL  | Ccdc51     | 0.059    |
| Amacr       | 0.000177869 | 5.073618162 | 0.059 | 0     |             | 1 CTRL  | Amacr      | 0.059    |
| Apol9a      | 0.000177869 | 4.969736172 | 0.059 | 0     |             | 1 CTRL  | Apol9a     | 0.059    |
| Foxk1       | 0.000177869 | 4.951074023 | 0.059 | 0     |             | 1 CTRL  | Foxk1      | 0.059    |
| Gm45509     | 0.000177869 | 4.886902886 | 0.059 | 0     |             | 1 CTRL  | Gm45509    | 0.059    |
| Gpsm2       | 0.000177869 | 4.882710717 | 0.059 | 0     |             | 1 CTRL  | Gpsm2      | 0.059    |
| Rasd2       | 0.000177869 | 4.819080148 | 0.059 | 0     |             | 1 CTRL  | Rasd2      | 0.059    |
| Trmt10b     | 0.000177869 | 4.718865996 | 0.059 | 0     |             | 1 CTRL  | Trmt10b    | 0.059    |
| Cdca2       | 0.000177869 | 4.467428481 | 0.059 | 0     |             | 1 CTRL  | Cdca2      | 0.059    |
| Timm44      | 0.000245303 | 4.113314966 | 0.118 | 0.013 |             | 1 CTRL  | Timm44     | 0.105    |
| Fkbp9       | 0.000270867 | 3.459481666 | 0.118 | 0.013 |             | 1 CTRL  | Fkbp9      | 0.105    |
| Mt3         | 0.000286346 | 2.903504471 | 0.147 | 0.021 |             | 1 CTRL  | Mt3        | 0.126    |
| 1810032O08R | 0.000289275 | 3.168466771 | 0.118 | 0.013 |             | 1 CTRL  | 1810032O08 | 0.105    |
| Gadd45b     | 0.000336167 | 1.416210437 | 0.676 | 0.49  |             | 1 CTRL  | Gadd45b    | 0.186    |
| Hk2         | 0.000385007 | 2.526218068 | 0.176 | 0.033 |             | 1 CTRL  | Hk2        | 0.143    |
| Dct         | 0.000466448 | 1.05274499  | 0.559 | 0.289 |             | 1 CTRL  | Dct        | 0.27     |
| Rcsd1       | 0.000627267 | 1.73371252  | 0.265 | 0.075 |             | 1 CTRL  | Rcsd1      | 0.19     |
| Poldip2     | 0.000640501 | 2.777797009 | 0.147 | 0.025 |             | 1 CTRL  | Poldip2    | 0.122    |
| Smg5        | 0.000674621 | 2.642826406 | 0.206 | 0.05  |             | 1 CTRL  | Smg5       | 0.156    |
| Carhsp1     | 0.000686233 | 2.768276325 | 0.176 | 0.038 |             | 1 CTRL  | Carhsp1    | 0.138    |
| Npm3        | 0.000784148 | 2.303439978 | 0.235 | 0.067 |             | 1 CTRL  | Npm3       | 0.168    |
| Fnbp4       | 0.000832366 | 2.180957372 | 0.206 | 0.05  |             | 1 CTRL  | Fnbp4      | 0.156    |
| Car6        | 0.000923943 | 2.170913235 | 0.176 | 0.038 |             | 1 CTRL  | Car6       | 0.138    |
| Nop2        | 0.001081216 | 4.343748115 | 0.088 | 0.008 |             | 1 CTRL  | Nop2       | 0.08     |
| Ulk3        | 0.001120036 | 3.377651401 | 0.088 | 0.008 |             | 1 CTRL  | Ulk3       | 0.08     |
| Eif2ak1     | 0.00116014  | 3.484582266 | 0.088 | 0.008 |             | 1 CTRL  | Eif2ak1    | 0.08     |
| Thg1l       | 0.00116014  | 3.420188804 | 0.088 | 0.008 |             | 1 CTRL  | Thg1l      | 0.08     |

|             |             |             |       |       |        |            |       |
|-------------|-------------|-------------|-------|-------|--------|------------|-------|
| Tbc1d7      | 0.00116014  | 3.304704151 | 0.088 | 0.008 | 1 CTRL | Tbc1d7     | 0.08  |
| Cystm1      | 0.001170738 | 2.88251393  | 0.118 | 0.017 | 1 CTRL | Cystm1     | 0.101 |
| Klf3        | 0.001201569 | 3.621926305 | 0.088 | 0.008 | 1 CTRL | Klf3       | 0.08  |
| Mgarp       | 0.001201569 | 3.298599127 | 0.088 | 0.008 | 1 CTRL | Mgarp      | 0.08  |
| Prim1       | 0.00124436  | 3.194074494 | 0.088 | 0.008 | 1 CTRL | Prim1      | 0.08  |
| Serpinh1    | 0.00124436  | 2.947909525 | 0.088 | 0.008 | 1 CTRL | Serpinh1   | 0.08  |
| Praf2       | 0.001288555 | 2.630948199 | 0.088 | 0.008 | 1 CTRL | Praf2      | 0.08  |
| Nfkbia      | 0.001321167 | 1.110265212 | 0.765 | 0.598 | 1 CTRL | Nfkbia     | 0.167 |
| AY036118    | 0.001345401 | 0.711069021 | 0.971 | 0.808 | 1 CTRL | AY036118   | 0.163 |
| Tuba1b      | 0.001416286 | 2.068110177 | 0.294 | 0.105 | 1 CTRL | Tuba1b     | 0.189 |
| Laptm4a     | 0.001757976 | 1.439421187 | 0.324 | 0.126 | 1 CTRL | Laptm4a    | 0.198 |
| Gps1        | 0.001893469 | 1.847959715 | 0.235 | 0.071 | 1 CTRL | Gps1       | 0.164 |
| Sdf4        | 0.001900505 | 0.915364935 | 0.794 | 0.678 | 1 CTRL | Sdf4       | 0.116 |
| Sdhaf1      | 0.002233072 | 1.644178983 | 0.324 | 0.134 | 1 CTRL | Sdhaf1     | 0.19  |
| Snu13       | 0.002253526 | 1.084529907 | 0.382 | 0.155 | 1 CTRL | Snu13      | 0.227 |
| Vdac2       | 0.002337817 | 0.995693271 | 0.559 | 0.356 | 1 CTRL | Vdac2      | 0.203 |
| Tmcc1       | 0.002543779 | 2.584660657 | 0.176 | 0.046 | 1 CTRL | Tmcc1      | 0.13  |
| Chchd5      | 0.002583307 | 2.881235238 | 0.118 | 0.021 | 1 CTRL | Chchd5     | 0.097 |
| Trim27      | 0.002765896 | 1.712751307 | 0.235 | 0.075 | 1 CTRL | Trim27     | 0.16  |
| Hspa4       | 0.002782354 | 1.276106973 | 0.294 | 0.109 | 1 CTRL | Hspa4      | 0.185 |
| Epc1        | 0.002792954 | 1.688623348 | 0.206 | 0.059 | 1 CTRL | Epc1       | 0.147 |
| Chchd10     | 0.002865761 | 1.21624407  | 0.441 | 0.218 | 1 CTRL | Chchd10    | 0.223 |
| Tor1b       | 0.002921474 | 3.403106382 | 0.118 | 0.021 | 1 CTRL | Tor1b      | 0.097 |
| Sap30bp     | 0.002933917 | 1.865167969 | 0.206 | 0.059 | 1 CTRL | Sap30bp    | 0.147 |
| Zfp36       | 0.003288422 | 1.784915901 | 0.206 | 0.059 | 1 CTRL | Zfp36      | 0.147 |
| Slc25a11    | 0.003309195 | 1.721835492 | 0.265 | 0.092 | 1 CTRL | Slc25a11   | 0.173 |
| Ddit4       | 0.003898328 | 1.201431134 | 0.382 | 0.176 | 1 CTRL | Ddit4      | 0.206 |
| Uggt1       | 0.004119375 | 1.943451922 | 0.147 | 0.033 | 1 CTRL | Uggt1      | 0.114 |
| Abtb2       | 0.004228529 | 4.934752591 | 0.059 | 0.004 | 1 CTRL | Abtb2      | 0.055 |
| 2700097O09R | 0.004228529 | 4.360131798 | 0.059 | 0.004 | 1 CTRL | 2700097O09 | 0.055 |
| Nedd4l      | 0.004228529 | 4.311756837 | 0.059 | 0.004 | 1 CTRL | Nedd4l     | 0.055 |
| Parp3       | 0.004228529 | 4.122380604 | 0.059 | 0.004 | 1 CTRL | Parp3      | 0.055 |
| Tyr         | 0.004228529 | 4.020209239 | 0.059 | 0.004 | 1 CTRL | Tyr        | 0.055 |
| Pla2g2e     | 0.004228529 | 3.99731861  | 0.059 | 0.004 | 1 CTRL | Pla2g2e    | 0.055 |
| Cadm1       | 0.004228529 | 3.975959817 | 0.059 | 0.004 | 1 CTRL | Cadm1      | 0.055 |
| Nbn         | 0.004228529 | 3.931689607 | 0.059 | 0.004 | 1 CTRL | Nbn        | 0.055 |
| A230005M16l | 0.004228529 | 3.7945484   | 0.059 | 0.004 | 1 CTRL | A230005M1l | 0.055 |
| Cdon        | 0.004228529 | 3.698083469 | 0.059 | 0.004 | 1 CTRL | Cdon       | 0.055 |
| Gstm2       | 0.004228529 | 3.625883346 | 0.059 | 0.004 | 1 CTRL | Gstm2      | 0.055 |
| Mpv17       | 0.004403173 | 3.92832837  | 0.059 | 0.004 | 1 CTRL | Mpv17      | 0.055 |
| Tspyl4      | 0.004403173 | 3.909535231 | 0.059 | 0.004 | 1 CTRL | Tspyl4     | 0.055 |
| Jmjd8       | 0.004403173 | 3.893802637 | 0.059 | 0.004 | 1 CTRL | Jmjd8      | 0.055 |
| Pcgf3       | 0.004403173 | 3.602032074 | 0.059 | 0.004 | 1 CTRL | Pcgf3      | 0.055 |
| Tfpi        | 0.004403173 | 3.268269603 | 0.059 | 0.004 | 1 CTRL | Tfpi       | 0.055 |
| Ccdc61      | 0.004403173 | 3.068007335 | 0.059 | 0.004 | 1 CTRL | Ccdc61     | 0.055 |
| Cited1      | 0.004406015 | 3.549252343 | 0.088 | 0.013 | 1 CTRL | Cited1     | 0.075 |
| C1galt1c1   | 0.004534215 | 3.081738227 | 0.088 | 0.013 | 1 CTRL | C1galt1c1  | 0.075 |
| Tinagl1     | 0.004584329 | 3.412897916 | 0.059 | 0.004 | 1 CTRL | Tinagl1    | 0.055 |
| Isoc1       | 0.004584329 | 2.698714867 | 0.059 | 0.004 | 1 CTRL | Isoc1      | 0.055 |
| Slc39a11    | 0.004584329 | 2.515996038 | 0.059 | 0.004 | 1 CTRL | Slc39a11   | 0.055 |
| Gm867       | 0.004584329 | 2.103945414 | 0.059 | 0.004 | 1 CTRL | Gm867      | 0.055 |

|           |             |             |       |       |        |           |       |
|-----------|-------------|-------------|-------|-------|--------|-----------|-------|
| Saal1     | 0.004665785 | 3.134426563 | 0.088 | 0.013 | 1 CTRL | Saal1     | 0.075 |
| Polg2     | 0.004800802 | 2.897929812 | 0.088 | 0.013 | 1 CTRL | Polg2     | 0.075 |
| Mrps35    | 0.004805154 | 2.258230298 | 0.176 | 0.05  | 1 CTRL | Mrps35    | 0.126 |
| Klc4      | 0.004939344 | 3.166315095 | 0.088 | 0.013 | 1 CTRL | Klc4      | 0.075 |
| Ints3     | 0.004939344 | 2.691998949 | 0.088 | 0.013 | 1 CTRL | Ints3     | 0.075 |
| Golga1    | 0.004939344 | 2.608754748 | 0.088 | 0.013 | 1 CTRL | Golga1    | 0.075 |
| Btrc      | 0.005081494 | 2.750629301 | 0.088 | 0.013 | 1 CTRL | Btrc      | 0.075 |
| Bfar      | 0.005401901 | 1.932461616 | 0.176 | 0.05  | 1 CTRL | Bfar      | 0.126 |
| Serpina3g | 0.005719048 | 1.793125905 | 0.382 | 0.192 | 1 CTRL | Serpina3g | 0.19  |
| Slc25a5   | 0.005970059 | 0.700256787 | 0.735 | 0.582 | 1 CTRL | Slc25a5   | 0.153 |
| Rbms2     | 0.006447452 | 2.312134065 | 0.147 | 0.038 | 1 CTRL | Rbms2     | 0.109 |
| Scyl2     | 0.006447452 | 1.972471687 | 0.147 | 0.038 | 1 CTRL | Scyl2     | 0.109 |
| Fam98b    | 0.006642201 | 3.147240657 | 0.118 | 0.025 | 1 CTRL | Fam98b    | 0.093 |
| Vezf1     | 0.007083995 | 2.4133972   | 0.118 | 0.025 | 1 CTRL | Vezf1     | 0.093 |
| Galt      | 0.007083995 | 2.258871776 | 0.118 | 0.025 | 1 CTRL | Galt      | 0.093 |
| Areg      | 0.007143857 | 1.236973008 | 0.559 | 0.339 | 1 CTRL | Areg      | 0.22  |
| Gtf2h2    | 0.007237019 | 1.87360314  | 0.118 | 0.025 | 1 CTRL | Gtf2h2    | 0.093 |
| Id2       | 0.007305199 | 0.860344776 | 0.618 | 0.439 | 1 CTRL | Id2       | 0.179 |
| Tctex1d2  | 0.007393003 | 2.251500433 | 0.118 | 0.025 | 1 CTRL | Tctex1d2  | 0.093 |
| Asf1a     | 0.007551996 | 2.180683273 | 0.118 | 0.025 | 1 CTRL | Asf1a     | 0.093 |
| Srp72     | 0.007614586 | 1.493182864 | 0.324 | 0.146 | 1 CTRL | Srp72     | 0.178 |
| Tceal9    | 0.007833575 | 2.133114893 | 0.265 | 0.113 | 1 CTRL | Tceal9    | 0.152 |
| Ly75      | 0.00787692  | 1.481558936 | 0.147 | 0.038 | 1 CTRL | Ly75      | 0.109 |
| Lancl1    | 0.008047531 | 1.894794101 | 0.118 | 0.025 | 1 CTRL | Lancl1    | 0.093 |
| Zfp395    | 0.008285456 | 5.880126522 | 0.029 | 0     | 1 CTRL | Zfp395    | 0.029 |
| Try5      | 0.008285456 | 5.590124008 | 0.029 | 0     | 1 CTRL | Try5      | 0.029 |
| Oas2      | 0.008285456 | 5.260197869 | 0.029 | 0     | 1 CTRL | Oas2      | 0.029 |
| Naa25     | 0.008285456 | 5.260197869 | 0.029 | 0     | 1 CTRL | Naa25     | 0.029 |
| Fzd7      | 0.008285456 | 5.244243656 | 0.029 | 0     | 1 CTRL | Fzd7      | 0.029 |
| Batf3     | 0.008285456 | 5.244243656 | 0.029 | 0     | 1 CTRL | Batf3     | 0.029 |
| Nat8      | 0.008285456 | 5.244243656 | 0.029 | 0     | 1 CTRL | Nat8      | 0.029 |
| Plbd1     | 0.008285456 | 5.244243656 | 0.029 | 0     | 1 CTRL | Plbd1     | 0.029 |
| Fuk       | 0.008285456 | 5.244243656 | 0.029 | 0     | 1 CTRL | Fuk       | 0.029 |
| Pfas      | 0.008285456 | 5.244243656 | 0.029 | 0     | 1 CTRL | Pfas      | 0.029 |
| Prss30    | 0.008285456 | 5.244243656 | 0.029 | 0     | 1 CTRL | Prss30    | 0.029 |
| Gm26749   | 0.008285456 | 5.244243656 | 0.029 | 0     | 1 CTRL | Gm26749   | 0.029 |
| Fgfbp3    | 0.008285456 | 5.244243656 | 0.029 | 0     | 1 CTRL | Fgfbp3    | 0.029 |
| Plpp7     | 0.008285456 | 5.211161336 | 0.029 | 0     | 1 CTRL | Plpp7     | 0.029 |
| Insrr     | 0.008285456 | 5.211161336 | 0.029 | 0     | 1 CTRL | Insrr     | 0.029 |
| Gm11837   | 0.008285456 | 5.211161336 | 0.029 | 0     | 1 CTRL | Gm11837   | 0.029 |
| Gm28053   | 0.008285456 | 5.211161336 | 0.029 | 0     | 1 CTRL | Gm28053   | 0.029 |
| Wasf1     | 0.008285456 | 5.211161336 | 0.029 | 0     | 1 CTRL | Wasf1     | 0.029 |
| Tbx4      | 0.008285456 | 5.211161336 | 0.029 | 0     | 1 CTRL | Tbx4      | 0.029 |
| Crip2     | 0.008285456 | 5.211161336 | 0.029 | 0     | 1 CTRL | Crip2     | 0.029 |
| Ecscr     | 0.008285456 | 5.211161336 | 0.029 | 0     | 1 CTRL | Ecscr     | 0.029 |
| Nsun6     | 0.008285456 | 5.202586883 | 0.029 | 0     | 1 CTRL | Nsun6     | 0.029 |
| P2ry1     | 0.008285456 | 5.202586883 | 0.029 | 0     | 1 CTRL | P2ry1     | 0.029 |
| Trim63    | 0.008285456 | 5.202586883 | 0.029 | 0     | 1 CTRL | Trim63    | 0.029 |
| Adgrg1    | 0.008285456 | 5.202586883 | 0.029 | 0     | 1 CTRL | Adgrg1    | 0.029 |
| Tmprss13  | 0.008285456 | 5.202586883 | 0.029 | 0     | 1 CTRL | Tmprss13  | 0.029 |
| Rhbdf1    | 0.008285456 | 5.202586883 | 0.029 | 0     | 1 CTRL | Rhbdf1    | 0.029 |

|             |             |             |       |   |        |            |       |
|-------------|-------------|-------------|-------|---|--------|------------|-------|
| Prkar2b     | 0.008285456 | 5.202586883 | 0.029 | 0 | 1 CTRL | Prkar2b    | 0.029 |
| Hspb1       | 0.008285456 | 5.142390784 | 0.029 | 0 | 1 CTRL | Hspb1      | 0.029 |
| Parp2       | 0.008285456 | 5.142390784 | 0.029 | 0 | 1 CTRL | Parp2      | 0.029 |
| Trav14n-3   | 0.008285456 | 5.142390784 | 0.029 | 0 | 1 CTRL | Trav14n-3  | 0.029 |
| Tirap       | 0.008285456 | 5.142390784 | 0.029 | 0 | 1 CTRL | Tirap      | 0.029 |
| Gm11696     | 0.008285456 | 5.142390784 | 0.029 | 0 | 1 CTRL | Gm11696    | 0.029 |
| Qtrt2       | 0.008285456 | 5.142390784 | 0.029 | 0 | 1 CTRL | Qtrt2      | 0.029 |
| 0610009O20R | 0.008285456 | 5.142390784 | 0.029 | 0 | 1 CTRL | 0610009O20 | 0.029 |
| E2f1        | 0.008285456 | 4.956180307 | 0.029 | 0 | 1 CTRL | E2f1       | 0.029 |
| Zfp772      | 0.008285456 | 4.956180307 | 0.029 | 0 | 1 CTRL | Zfp772     | 0.029 |
| Zfp111      | 0.008285456 | 4.956180307 | 0.029 | 0 | 1 CTRL | Zfp111     | 0.029 |
| Pitrm1      | 0.008285456 | 4.956180307 | 0.029 | 0 | 1 CTRL | Pitrm1     | 0.029 |
| Plekhm3     | 0.008285456 | 4.947650243 | 0.029 | 0 | 1 CTRL | Plekhm3    | 0.029 |
| Gm13708     | 0.008285456 | 4.947650243 | 0.029 | 0 | 1 CTRL | Gm13708    | 0.029 |
| Kcnd1       | 0.008285456 | 4.947650243 | 0.029 | 0 | 1 CTRL | Kcnd1      | 0.029 |
| Ccdc77      | 0.008285456 | 4.947650243 | 0.029 | 0 | 1 CTRL | Ccdc77     | 0.029 |
| Loxl2       | 0.008285456 | 4.947650243 | 0.029 | 0 | 1 CTRL | Loxl2      | 0.029 |
| Scn2a       | 0.008285456 | 4.796321094 | 0.029 | 0 | 1 CTRL | Scn2a      | 0.029 |
| Asph        | 0.008285456 | 4.796321094 | 0.029 | 0 | 1 CTRL | Asph       | 0.029 |
| Creld1      | 0.008285456 | 4.796321094 | 0.029 | 0 | 1 CTRL | Creld1     | 0.029 |
| Spata2l     | 0.008285456 | 4.796321094 | 0.029 | 0 | 1 CTRL | Spata2l    | 0.029 |
| Gm16907     | 0.008285456 | 4.796321094 | 0.029 | 0 | 1 CTRL | Gm16907    | 0.029 |
| Atg9b       | 0.008285456 | 4.740500063 | 0.029 | 0 | 1 CTRL | Atg9b      | 0.029 |
| Pinx1       | 0.008285456 | 4.740500063 | 0.029 | 0 | 1 CTRL | Pinx1      | 0.029 |
| Cbr2        | 0.008285456 | 4.740500063 | 0.029 | 0 | 1 CTRL | Cbr2       | 0.029 |
| Adgrf5      | 0.008285456 | 4.740500063 | 0.029 | 0 | 1 CTRL | Adgrf5     | 0.029 |
| Loxl4       | 0.008285456 | 4.740500063 | 0.029 | 0 | 1 CTRL | Loxl4      | 0.029 |
| Scamp5      | 0.008285456 | 4.735648929 | 0.029 | 0 | 1 CTRL | Scamp5     | 0.029 |
| Rab26       | 0.008285456 | 4.735648929 | 0.029 | 0 | 1 CTRL | Rab26      | 0.029 |
| Gm17552     | 0.008285456 | 4.735648929 | 0.029 | 0 | 1 CTRL | Gm17552    | 0.029 |
| B3gat2      | 0.008285456 | 4.729609637 | 0.029 | 0 | 1 CTRL | B3gat2     | 0.029 |
| Fam198b     | 0.008285456 | 4.729609637 | 0.029 | 0 | 1 CTRL | Fam198b    | 0.029 |
| F3          | 0.008285456 | 4.729609637 | 0.029 | 0 | 1 CTRL | F3         | 0.029 |
| Sowahc      | 0.008285456 | 4.729609637 | 0.029 | 0 | 1 CTRL | Sowahc     | 0.029 |
| Gatc        | 0.008285456 | 4.651211354 | 0.029 | 0 | 1 CTRL | Gatc       | 0.029 |
| Cmtr2       | 0.008285456 | 4.651211354 | 0.029 | 0 | 1 CTRL | Cmtr2      | 0.029 |
| Mtrf1       | 0.008285456 | 4.651211354 | 0.029 | 0 | 1 CTRL | Mtrf1      | 0.029 |
| Ccdc15      | 0.008285456 | 4.651211354 | 0.029 | 0 | 1 CTRL | Ccdc15     | 0.029 |
| Nphp3       | 0.008285456 | 4.651211354 | 0.029 | 0 | 1 CTRL | Nphp3      | 0.029 |
| Mfsd3       | 0.008285456 | 4.651211354 | 0.029 | 0 | 1 CTRL | Mfsd3      | 0.029 |
| Rcor3       | 0.008285456 | 4.637643802 | 0.029 | 0 | 1 CTRL | Rcor3      | 0.029 |
| Pter        | 0.008285456 | 4.637643802 | 0.029 | 0 | 1 CTRL | Pter       | 0.029 |
| Afap1       | 0.008285456 | 4.637643802 | 0.029 | 0 | 1 CTRL | Afap1      | 0.029 |
| Nav3        | 0.008285456 | 4.637643802 | 0.029 | 0 | 1 CTRL | Nav3       | 0.029 |
| Hes1        | 0.008285456 | 4.637643802 | 0.029 | 0 | 1 CTRL | Hes1       | 0.029 |
| Pcdhgb2     | 0.008285456 | 4.637643802 | 0.029 | 0 | 1 CTRL | Pcdhgb2    | 0.029 |
| Khdc1a      | 0.008285456 | 4.619766199 | 0.029 | 0 | 1 CTRL | Khdc1a     | 0.029 |
| Adamts13    | 0.008285456 | 4.619766199 | 0.029 | 0 | 1 CTRL | Adamts13   | 0.029 |
| Trmo        | 0.008285456 | 4.619766199 | 0.029 | 0 | 1 CTRL | Trmo       | 0.029 |
| Gorasp1     | 0.008285456 | 4.619766199 | 0.029 | 0 | 1 CTRL | Gorasp1    | 0.029 |
| Tubb3       | 0.008285456 | 4.517278729 | 0.029 | 0 | 1 CTRL | Tubb3      | 0.029 |

|              |             |             |       |   |        |             |       |
|--------------|-------------|-------------|-------|---|--------|-------------|-------|
| Cyp1b1       | 0.008285456 | 4.517278729 | 0.029 | 0 | 1 CTRL | Cyp1b1      | 0.029 |
| Cyb5r1       | 0.008285456 | 4.489828145 | 0.029 | 0 | 1 CTRL | Cyb5r1      | 0.029 |
| Lin9         | 0.008285456 | 4.489828145 | 0.029 | 0 | 1 CTRL | Lin9        | 0.029 |
| Aar2         | 0.008285456 | 4.489828145 | 0.029 | 0 | 1 CTRL | Aar2        | 0.029 |
| Lonrf3       | 0.008285456 | 4.489828145 | 0.029 | 0 | 1 CTRL | Lonrf3      | 0.029 |
| Gsdmc        | 0.008285456 | 4.489828145 | 0.029 | 0 | 1 CTRL | Gsdmc       | 0.029 |
| 9130011E15Ri | 0.008285456 | 4.489828145 | 0.029 | 0 | 1 CTRL | 9130011E15  | 0.029 |
| Mpped2       | 0.008285456 | 4.443365419 | 0.029 | 0 | 1 CTRL | Mpped2      | 0.029 |
| Tmem8b       | 0.008285456 | 4.443365419 | 0.029 | 0 | 1 CTRL | Tmem8b      | 0.029 |
| Sbk1         | 0.008285456 | 4.443365419 | 0.029 | 0 | 1 CTRL | Sbk1        | 0.029 |
| Pnma2        | 0.008285456 | 4.443365419 | 0.029 | 0 | 1 CTRL | Pnma2       | 0.029 |
| Tefm         | 0.008285456 | 4.443365419 | 0.029 | 0 | 1 CTRL | Tefm        | 0.029 |
| Cryzl2       | 0.008285456 | 4.435617586 | 0.029 | 0 | 1 CTRL | Cryzl2      | 0.029 |
| Pard6b       | 0.008285456 | 4.435617586 | 0.029 | 0 | 1 CTRL | Pard6b      | 0.029 |
| Hdac6        | 0.008285456 | 4.435617586 | 0.029 | 0 | 1 CTRL | Hdac6       | 0.029 |
| Cavin4       | 0.008285456 | 4.435617586 | 0.029 | 0 | 1 CTRL | Cavin4      | 0.029 |
| Fgfrl1       | 0.008285456 | 4.435617586 | 0.029 | 0 | 1 CTRL | Fgfrl1      | 0.029 |
| Usp18        | 0.008285456 | 4.435617586 | 0.029 | 0 | 1 CTRL | Usp18       | 0.029 |
| E2f8         | 0.008285456 | 4.435617586 | 0.029 | 0 | 1 CTRL | E2f8        | 0.029 |
| Gas7         | 0.008285456 | 4.435617586 | 0.029 | 0 | 1 CTRL | Gas7        | 0.029 |
| Ptges3l      | 0.008285456 | 4.435617586 | 0.029 | 0 | 1 CTRL | Ptges3l     | 0.029 |
| Trp53cor1    | 0.008285456 | 4.435617586 | 0.029 | 0 | 1 CTRL | Trp53cor1   | 0.029 |
| Emilin2      | 0.008285456 | 4.435617586 | 0.029 | 0 | 1 CTRL | Emilin2     | 0.029 |
| Ifit3b       | 0.008285456 | 4.435617586 | 0.029 | 0 | 1 CTRL | Ifit3b      | 0.029 |
| Armcx2       | 0.008285456 | 4.332585089 | 0.029 | 0 | 1 CTRL | Armcx2      | 0.029 |
| Cc2d2a       | 0.008285456 | 4.332585089 | 0.029 | 0 | 1 CTRL | Cc2d2a      | 0.029 |
| Syde1        | 0.008285456 | 4.332585089 | 0.029 | 0 | 1 CTRL | Syde1       | 0.029 |
| Clu          | 0.008285456 | 4.332585089 | 0.029 | 0 | 1 CTRL | Clu         | 0.029 |
| Gm2245       | 0.008285456 | 4.332585089 | 0.029 | 0 | 1 CTRL | Gm2245      | 0.029 |
| Parvb        | 0.008285456 | 4.332585089 | 0.029 | 0 | 1 CTRL | Parvb       | 0.029 |
| Spink10      | 0.008285456 | 4.332585089 | 0.029 | 0 | 1 CTRL | Spink10     | 0.029 |
| A930041C12R  | 0.008285456 | 4.330801033 | 0.029 | 0 | 1 CTRL | A930041C12  | 0.029 |
| 9930022D16R  | 0.008285456 | 4.330801033 | 0.029 | 0 | 1 CTRL | 9930022D16  | 0.029 |
| Sapcd1       | 0.008285456 | 4.330801033 | 0.029 | 0 | 1 CTRL | Sapcd1      | 0.029 |
| Akap17b      | 0.008285456 | 4.303455498 | 0.029 | 0 | 1 CTRL | Akap17b     | 0.029 |
| Efna4        | 0.008285456 | 4.303455498 | 0.029 | 0 | 1 CTRL | Efna4       | 0.029 |
| Npr2         | 0.008285456 | 4.303455498 | 0.029 | 0 | 1 CTRL | Npr2        | 0.029 |
| Pex26        | 0.008285456 | 4.303455498 | 0.029 | 0 | 1 CTRL | Pex26       | 0.029 |
| Zfp975       | 0.008285456 | 4.303455498 | 0.029 | 0 | 1 CTRL | Zfp975      | 0.029 |
| Gm10273      | 0.008285456 | 4.303455498 | 0.029 | 0 | 1 CTRL | Gm10273     | 0.029 |
| Gjb2         | 0.008285456 | 4.303455498 | 0.029 | 0 | 1 CTRL | Gjb2        | 0.029 |
| Gm26819      | 0.008285456 | 4.303455498 | 0.029 | 0 | 1 CTRL | Gm26819     | 0.029 |
| Angel1       | 0.008285456 | 4.303455498 | 0.029 | 0 | 1 CTRL | Angel1      | 0.029 |
| Mafa         | 0.008285456 | 4.303455498 | 0.029 | 0 | 1 CTRL | Mafa        | 0.029 |
| Prph         | 0.008285456 | 4.303455498 | 0.029 | 0 | 1 CTRL | Prph        | 0.029 |
| A130010J15Ri | 0.008285456 | 4.264754286 | 0.029 | 0 | 1 CTRL | A130010J15I | 0.029 |
| Ccdc141      | 0.008285456 | 4.264754286 | 0.029 | 0 | 1 CTRL | Ccdc141     | 0.029 |
| Myom3        | 0.008285456 | 4.264754286 | 0.029 | 0 | 1 CTRL | Myom3       | 0.029 |
| Dennd2a      | 0.008285456 | 4.264754286 | 0.029 | 0 | 1 CTRL | Dennd2a     | 0.029 |
| C1ra         | 0.008285456 | 4.264754286 | 0.029 | 0 | 1 CTRL | C1ra        | 0.029 |
| Zbtb14       | 0.008285456 | 4.264754286 | 0.029 | 0 | 1 CTRL | Zbtb14      | 0.029 |

|              |             |             |       |   |        |            |       |
|--------------|-------------|-------------|-------|---|--------|------------|-------|
| Gpr143       | 0.008285456 | 4.201094261 | 0.029 | 0 | 1 CTRL | Gpr143     | 0.029 |
| Gm30074      | 0.008285456 | 4.201094261 | 0.029 | 0 | 1 CTRL | Gm30074    | 0.029 |
| Plpp3        | 0.008285456 | 4.201094261 | 0.029 | 0 | 1 CTRL | Plpp3      | 0.029 |
| Mypop        | 0.008285456 | 4.201094261 | 0.029 | 0 | 1 CTRL | Mypop      | 0.029 |
| Hmga2        | 0.008285456 | 4.201094261 | 0.029 | 0 | 1 CTRL | Hmga2      | 0.029 |
| Asb5         | 0.008285456 | 4.201094261 | 0.029 | 0 | 1 CTRL | Asb5       | 0.029 |
| Anln         | 0.008285456 | 4.201094261 | 0.029 | 0 | 1 CTRL | Anln       | 0.029 |
| Icam2        | 0.008285456 | 4.201094261 | 0.029 | 0 | 1 CTRL | Icam2      | 0.029 |
| Trpc7        | 0.008285456 | 4.201094261 | 0.029 | 0 | 1 CTRL | Trpc7      | 0.029 |
| Scamp1       | 0.008285456 | 4.201094261 | 0.029 | 0 | 1 CTRL | Scamp1     | 0.029 |
| Top1mt       | 0.008285456 | 4.201094261 | 0.029 | 0 | 1 CTRL | Top1mt     | 0.029 |
| Gsto2        | 0.008285456 | 4.201094261 | 0.029 | 0 | 1 CTRL | Gsto2      | 0.029 |
| Ddx31        | 0.008285456 | 4.167646114 | 0.029 | 0 | 1 CTRL | Ddx31      | 0.029 |
| Trp53rka     | 0.008285456 | 4.167646114 | 0.029 | 0 | 1 CTRL | Trp53rka   | 0.029 |
| Clec4b1      | 0.008285456 | 4.167646114 | 0.029 | 0 | 1 CTRL | Clec4b1    | 0.029 |
| Zfp773       | 0.008285456 | 4.167646114 | 0.029 | 0 | 1 CTRL | Zfp773     | 0.029 |
| 2610008E11Ri | 0.008285456 | 4.167646114 | 0.029 | 0 | 1 CTRL | 2610008E11 | 0.029 |
| Smyd4        | 0.008285456 | 4.167646114 | 0.029 | 0 | 1 CTRL | Smyd4      | 0.029 |
| Gm15445      | 0.008285456 | 4.007460712 | 0.029 | 0 | 1 CTRL | Gm15445    | 0.029 |
| Tmem141      | 0.008285456 | 4.007460712 | 0.029 | 0 | 1 CTRL | Tmem141    | 0.029 |
| Rhox8        | 0.008285456 | 4.007460712 | 0.029 | 0 | 1 CTRL | Rhox8      | 0.029 |
| Chic1        | 0.008285456 | 4.007460712 | 0.029 | 0 | 1 CTRL | Chic1      | 0.029 |
| Gm10399      | 0.008285456 | 4.007460712 | 0.029 | 0 | 1 CTRL | Gm10399    | 0.029 |
| Gm15133      | 0.008285456 | 4.007460712 | 0.029 | 0 | 1 CTRL | Gm15133    | 0.029 |
| Gm9803       | 0.008285456 | 4.007460712 | 0.029 | 0 | 1 CTRL | Gm9803     | 0.029 |
| Pbk          | 0.008285456 | 4.007460712 | 0.029 | 0 | 1 CTRL | Pbk        | 0.029 |
| Mtx3         | 0.008285456 | 4.007460712 | 0.029 | 0 | 1 CTRL | Mtx3       | 0.029 |
| Trim36       | 0.008285456 | 4.007460712 | 0.029 | 0 | 1 CTRL | Trim36     | 0.029 |
| Cnot9        | 0.008285456 | 3.93990378  | 0.029 | 0 | 1 CTRL | Cnot9      | 0.029 |
| Nes          | 0.008285456 | 3.93990378  | 0.029 | 0 | 1 CTRL | Nes        | 0.029 |
| Kazn         | 0.008285456 | 3.93990378  | 0.029 | 0 | 1 CTRL | Kazn       | 0.029 |
| Zfp956       | 0.008285456 | 3.93990378  | 0.029 | 0 | 1 CTRL | Zfp956     | 0.029 |
| Ccer2        | 0.008285456 | 3.93990378  | 0.029 | 0 | 1 CTRL | Ccer2      | 0.029 |
| Tdh          | 0.008285456 | 3.93990378  | 0.029 | 0 | 1 CTRL | Tdh        | 0.029 |
| Qtrt1        | 0.008285456 | 3.93990378  | 0.029 | 0 | 1 CTRL | Qtrt1      | 0.029 |
| Wdr5b        | 0.008285456 | 3.93990378  | 0.029 | 0 | 1 CTRL | Wdr5b      | 0.029 |
| B4galt6      | 0.008285456 | 3.93990378  | 0.029 | 0 | 1 CTRL | B4galt6    | 0.029 |
| Myof         | 0.008285456 | 3.93990378  | 0.029 | 0 | 1 CTRL | Myof       | 0.029 |
| Gm6710       | 0.008285456 | 3.931379867 | 0.029 | 0 | 1 CTRL | Gm6710     | 0.029 |
| Prkcg        | 0.008285456 | 3.931379867 | 0.029 | 0 | 1 CTRL | Prkcg      | 0.029 |
| Olfr961      | 0.008285456 | 3.931379867 | 0.029 | 0 | 1 CTRL | Olfr961    | 0.029 |
| Gm29562      | 0.008285456 | 3.931379867 | 0.029 | 0 | 1 CTRL | Gm29562    | 0.029 |
| Dnmbp        | 0.008285456 | 3.931379867 | 0.029 | 0 | 1 CTRL | Dnmbp      | 0.029 |
| Efcab2       | 0.008285456 | 3.633800839 | 0.029 | 0 | 1 CTRL | Efcab2     | 0.029 |
| Ttc30a1      | 0.008285456 | 3.633800839 | 0.029 | 0 | 1 CTRL | Ttc30a1    | 0.029 |
| Aldh1b1      | 0.008285456 | 3.633800839 | 0.029 | 0 | 1 CTRL | Aldh1b1    | 0.029 |
| 5830473C10R  | 0.008285456 | 3.633800839 | 0.029 | 0 | 1 CTRL | 5830473C10 | 0.029 |
| Nat8f1       | 0.008285456 | 3.633800839 | 0.029 | 0 | 1 CTRL | Nat8f1     | 0.029 |
| Gm38947      | 0.008285456 | 3.633800839 | 0.029 | 0 | 1 CTRL | Gm38947    | 0.029 |
| Zfp568       | 0.008285456 | 3.633800839 | 0.029 | 0 | 1 CTRL | Zfp568     | 0.029 |
| Map7         | 0.008285456 | 3.633800839 | 0.029 | 0 | 1 CTRL | Map7       | 0.029 |

|              |             |             |       |   |        |             |       |
|--------------|-------------|-------------|-------|---|--------|-------------|-------|
| Prss57       | 0.008285456 | 3.633800839 | 0.029 | 0 | 1 CTRL | Prss57      | 0.029 |
| Celf5        | 0.008285456 | 3.633800839 | 0.029 | 0 | 1 CTRL | Celf5       | 0.029 |
| Oaf          | 0.008285456 | 3.633800839 | 0.029 | 0 | 1 CTRL | Oaf         | 0.029 |
| Zfp3         | 0.008285456 | 3.633800839 | 0.029 | 0 | 1 CTRL | Zfp3        | 0.029 |
| Gm45606      | 0.008285456 | 3.633800839 | 0.029 | 0 | 1 CTRL | Gm45606     | 0.029 |
| Dnaaf2       | 0.008285456 | 3.633800839 | 0.029 | 0 | 1 CTRL | Dnaaf2      | 0.029 |
| Ankrd13d     | 0.008285456 | 3.633800839 | 0.029 | 0 | 1 CTRL | Ankrd13d    | 0.029 |
| Lad1         | 0.008285456 | 3.607322533 | 0.029 | 0 | 1 CTRL | Lad1        | 0.029 |
| Bfsp1        | 0.008285456 | 3.607322533 | 0.029 | 0 | 1 CTRL | Bfsp1       | 0.029 |
| Tmem67       | 0.008285456 | 3.607322533 | 0.029 | 0 | 1 CTRL | Tmem67      | 0.029 |
| Uchl1        | 0.008285456 | 3.607322533 | 0.029 | 0 | 1 CTRL | Uchl1       | 0.029 |
| Fgd6         | 0.008285456 | 3.607322533 | 0.029 | 0 | 1 CTRL | Fgd6        | 0.029 |
| Uaca         | 0.008285456 | 3.607322533 | 0.029 | 0 | 1 CTRL | Uaca        | 0.029 |
| Scin         | 0.008285456 | 3.607322533 | 0.029 | 0 | 1 CTRL | Scin        | 0.029 |
| D930030I03Ri | 0.008285456 | 3.607322533 | 0.029 | 0 | 1 CTRL | D930030I03I | 0.029 |
| Tcf4         | 0.008285456 | 3.607322533 | 0.029 | 0 | 1 CTRL | Tcf4        | 0.029 |
| Mroh8        | 0.008285456 | 3.383904546 | 0.029 | 0 | 1 CTRL | Mroh8       | 0.029 |
| Fam122b      | 0.008285456 | 3.383904546 | 0.029 | 0 | 1 CTRL | Fam122b     | 0.029 |
| Zc4h2        | 0.008285456 | 3.383904546 | 0.029 | 0 | 1 CTRL | Zc4h2       | 0.029 |
| Col16a1      | 0.008285456 | 3.383904546 | 0.029 | 0 | 1 CTRL | Col16a1     | 0.029 |
| Bicd1        | 0.008285456 | 3.383904546 | 0.029 | 0 | 1 CTRL | Bicd1       | 0.029 |
| Atp6v1b1     | 0.008285456 | 3.383904546 | 0.029 | 0 | 1 CTRL | Atp6v1b1    | 0.029 |
| Zik1         | 0.008285456 | 3.383904546 | 0.029 | 0 | 1 CTRL | Zik1        | 0.029 |
| Mtg1         | 0.008285456 | 3.383904546 | 0.029 | 0 | 1 CTRL | Mtg1        | 0.029 |
| Gemin5       | 0.008285456 | 3.383904546 | 0.029 | 0 | 1 CTRL | Gemin5      | 0.029 |
| Six1         | 0.008285456 | 3.383904546 | 0.029 | 0 | 1 CTRL | Six1        | 0.029 |
| Tecpr2       | 0.008285456 | 3.383904546 | 0.029 | 0 | 1 CTRL | Tecpr2      | 0.029 |
| Lbhd2        | 0.008285456 | 3.383904546 | 0.029 | 0 | 1 CTRL | Lbhd2       | 0.029 |
| Ncapg2       | 0.008285456 | 3.383904546 | 0.029 | 0 | 1 CTRL | Ncapg2      | 0.029 |
| Oosp1        | 0.008285456 | 3.383904546 | 0.029 | 0 | 1 CTRL | Oosp1       | 0.029 |
| Ninl         | 0.008285456 | 3.005928514 | 0.029 | 0 | 1 CTRL | Ninl        | 0.029 |
| Hemgn        | 0.008285456 | 3.005928514 | 0.029 | 0 | 1 CTRL | Hemgn       | 0.029 |
| Cdkn2b       | 0.008285456 | 3.005928514 | 0.029 | 0 | 1 CTRL | Cdkn2b      | 0.029 |
| Gm32051      | 0.008285456 | 3.005928514 | 0.029 | 0 | 1 CTRL | Gm32051     | 0.029 |
| Ung          | 0.008285456 | 3.005928514 | 0.029 | 0 | 1 CTRL | Ung         | 0.029 |
| Zfp775       | 0.008285456 | 3.005928514 | 0.029 | 0 | 1 CTRL | Zfp775      | 0.029 |
| Tubgcp5      | 0.008285456 | 3.005928514 | 0.029 | 0 | 1 CTRL | Tubgcp5     | 0.029 |
| Gm16853      | 0.008285456 | 3.005928514 | 0.029 | 0 | 1 CTRL | Gm16853     | 0.029 |
| C3           | 0.008285456 | 3.005928514 | 0.029 | 0 | 1 CTRL | C3          | 0.029 |
| C130013H08R  | 0.008285456 | 2.975536882 | 0.029 | 0 | 1 CTRL | C130013H08  | 0.029 |
| Extl2        | 0.008285456 | 2.975536882 | 0.029 | 0 | 1 CTRL | Extl2       | 0.029 |
| Stbd1        | 0.008285456 | 2.975536882 | 0.029 | 0 | 1 CTRL | Stbd1       | 0.029 |
| Zfp446       | 0.008285456 | 2.975536882 | 0.029 | 0 | 1 CTRL | Zfp446      | 0.029 |
| Polr3e       | 0.008285456 | 2.975536882 | 0.029 | 0 | 1 CTRL | Polr3e      | 0.029 |
| Nlgn2        | 0.008285456 | 2.975536882 | 0.029 | 0 | 1 CTRL | Nlgn2       | 0.029 |
| Gm34794      | 0.008285456 | 2.975536882 | 0.029 | 0 | 1 CTRL | Gm34794     | 0.029 |
| Ccdc191      | 0.008285456 | 2.975536882 | 0.029 | 0 | 1 CTRL | Ccdc191     | 0.029 |
| Gm4950       | 0.008285456 | 2.975536882 | 0.029 | 0 | 1 CTRL | Gm4950      | 0.029 |
| Gm10521      | 0.008285456 | 2.923844582 | 0.029 | 0 | 1 CTRL | Gm10521     | 0.029 |
| 1110019D14R  | 0.008285456 | 2.923844582 | 0.029 | 0 | 1 CTRL | 1110019D14  | 0.029 |
| Zfp27        | 0.008285456 | 2.923844582 | 0.029 | 0 | 1 CTRL | Zfp27       | 0.029 |

|             |             |             |       |       |        |             |       |
|-------------|-------------|-------------|-------|-------|--------|-------------|-------|
| Zfp788      | 0.008285456 | 2.923844582 | 0.029 | 0     | 1 CTRL | Zfp788      | 0.029 |
| 2310057M21f | 0.008285456 | 2.923844582 | 0.029 | 0     | 1 CTRL | 2310057M21f | 0.029 |
| Rec8        | 0.008285456 | 2.923844582 | 0.029 | 0     | 1 CTRL | Rec8        | 0.029 |
| Nat6        | 0.008285456 | 2.923844582 | 0.029 | 0     | 1 CTRL | Nat6        | 0.029 |
| Kif19a      | 0.008285456 | 2.923844582 | 0.029 | 0     | 1 CTRL | Kif19a      | 0.029 |
| Traf1       | 0.008515446 | 1.278630027 | 0.618 | 0.444 | 1 CTRL | Traf1       | 0.174 |
| Btg1        | 0.008596149 | 0.894230229 | 0.794 | 0.628 | 1 CTRL | Btg1        | 0.166 |
| Cox7a2l     | 0.00092051  | 1.928211707 | 0.46  | 0.176 | 1 M28  | Cox7a2l     | 0.284 |
| Ppp1ca      | 0.001272377 | 1.161465481 | 0.644 | 0.353 | 1 M28  | Ppp1ca      | 0.291 |
| Uba52       | 0.001425654 | 2.600557769 | 0.351 | 0.088 | 1 M28  | Uba52       | 0.263 |
| Ssh2        | 0.003089473 | 7.302429937 | 0.213 | 0     | 1 M28  | Ssh2        | 0.213 |
| Ap2s1       | 0.003293329 | 2.089268503 | 0.389 | 0.147 | 1 M28  | Ap2s1       | 0.242 |
| Ebp         | 0.003897414 | 2.557319648 | 0.297 | 0.059 | 1 M28  | Ebp         | 0.238 |
| Lat         | 0.004198635 | 1.200309037 | 0.519 | 0.265 | 1 M28  | Lat         | 0.254 |
| Hcls1       | 0.00648106  | 1.712392958 | 0.397 | 0.176 | 1 M28  | Hcls1       | 0.221 |
| Lbh         | 0.006719582 | 1.845592506 | 0.289 | 0.059 | 1 M28  | Lbh         | 0.23  |
| Pak2        | 0.007089474 | 2.13475727  | 0.326 | 0.118 | 1 M28  | Pak2        | 0.208 |
| Dnajc15     | 0.007157335 | 2.826874094 | 0.234 | 0.029 | 1 M28  | Dnajc15     | 0.205 |
| Wdr26       | 0.008053103 | 2.874086667 | 0.259 | 0.059 | 1 M28  | Wdr26       | 0.2   |
| Atp5g1      | 0.008119816 | 1.014135844 | 0.444 | 0.206 | 1 M28  | Atp5g1      | 0.238 |
| Lcp1        | 0.008327032 | 0.917141309 | 0.649 | 0.471 | 1 M28  | Lcp1        | 0.178 |
| Ywhaz       | 0.008476742 | 1.335857374 | 0.368 | 0.118 | 1 M28  | Ywhaz       | 0.25  |
| Itgb7       | 0.008703945 | 1.049624846 | 0.628 | 0.412 | 1 M28  | Itgb7       | 0.216 |
| Dusp5       | 0.009000411 | 1.812857277 | 0.31  | 0.088 | 1 M28  | Dusp5       | 0.222 |
| Ube2h       | 0.009925125 | 2.763476606 | 0.222 | 0.029 | 1 M28  | Ube2h       | 0.193 |
