# Supplementary material
Source: PubMed Central journal article supplement (PMC8940682)
Supplement: NIHMS1773905-supplement-15.pdf [file NIHMS1773905-supplement-15.pdf]

**Supplemental Table 3. Gene Expression Fold Change in CD8+ T cells of control vs m28 treated tumors**

| gene_name    | p_val       | avg_log2FC  | pct.1 | pct.2 | p_val_adj   | cluster | gene         | pct.diff |
|--------------|-------------|-------------|-------|-------|-------------|---------|--------------|----------|
| Klra3        | 6.81327E-54 | 3.482776106 | 0.347 | 0.032 | 2.11572E-49 | CTRL    | Klra3        | 0.315    |
| Mt1          | 4.86102E-39 | 1.353896057 | 0.781 | 0.416 | 1.50949E-34 | CTRL    | Mt1          | 0.365    |
| Smpdl3b      | 2.46843E-28 | 1.914278241 | 0.308 | 0.07  | 7.66522E-24 | CTRL    | Smpdl3b      | 0.238    |
| Igkc         | 7.67231E-28 | 2.835043179 | 0.206 | 0.024 | 2.38248E-23 | CTRL    | Igkc         | 0.182    |
| Tpi1         | 7.8416E-27  | 0.958116277 | 0.783 | 0.509 | 2.43505E-22 | CTRL    | Tpi1         | 0.274    |
| Trbc1        | 1.50154E-20 | 0.780917649 | 0.497 | 0.207 | 4.66272E-16 | CTRL    | Trbc1        | 0.29     |
| Mt2          | 2.71422E-18 | 1.363055182 | 0.358 | 0.14  | 8.42846E-14 | CTRL    | Mt2          | 0.218    |
| Gzmf         | 8.57509E-16 | 1.000925142 | 0.278 | 0.101 | 2.66282E-11 | CTRL    | Gzmf         | 0.177    |
| Exph5        | 1.38672E-12 | 2.31932029  | 0.106 | 0.017 | 4.30617E-08 | CTRL    | Exph5        | 0.089    |
| 1700097N02R  | 1.93327E-10 | 1.140328522 | 0.219 | 0.086 | 6.00338E-06 | CTRL    | 1700097N02R  | 0.133    |
| Nrn1         | 7.34828E-10 | 0.928669837 | 0.358 | 0.196 | 2.28186E-05 | CTRL    | Nrn1         | 0.162    |
| Smyd2        | 1.21792E-09 | 1.247964909 | 0.178 | 0.064 | 3.78201E-05 | CTRL    | Smyd2        | 0.114    |
| Gm12840      | 1.37134E-09 | 1.283375164 | 0.117 | 0.03  | 4.25841E-05 | CTRL    | Gm12840      | 0.087    |
| Crbn         | 1.57928E-09 | 1.145622888 | 0.286 | 0.142 | 4.90414E-05 | CTRL    | Crbn         | 0.144    |
| Utf1         | 2.77252E-09 | 1.622838292 | 0.092 | 0.019 | 8.60952E-05 | CTRL    | Utf1         | 0.073    |
| Trbv16       | 9.45206E-09 | 3.67872596  | 0.036 | 0     | 0.000293515 | CTRL    | Trbv16       | 0.036    |
| Ier5l        | 2.12383E-08 | 0.930857937 | 0.453 | 0.311 | 0.000659513 | CTRL    | Ier5l        | 0.142    |
| Sdhaf1       | 2.16778E-08 | 1.084589457 | 0.244 | 0.119 | 0.00067316  | CTRL    | Sdhaf1       | 0.125    |
| Igfbp7       | 2.16887E-08 | 0.868771177 | 0.147 | 0.051 | 0.000673499 | CTRL    | Igfbp7       | 0.096    |
| Gldc         | 2.56292E-08 | 1.034958096 | 0.247 | 0.121 | 0.000795863 | CTRL    | Gldc         | 0.126    |
| Galk1        | 3.47456E-08 | 0.863515305 | 0.317 | 0.175 | 0.001078956 | CTRL    | Galk1        | 0.142    |
| Ifi211       | 1.76986E-07 | 1.606562014 | 0.086 | 0.022 | 0.005495933 | CTRL    | Ifi211       | 0.064    |
| Syt13        | 1.93257E-07 | 0.799699375 | 0.322 | 0.188 | 0.006001196 | CTRL    | Syt13        | 0.134    |
| Impact       | 2.14923E-07 | 1.44757745  | 0.15  | 0.061 | 0.006673991 | CTRL    | Impact       | 0.089    |
| Farsb        | 2.3312E-07  | 0.933148696 | 0.203 | 0.095 | 0.007239066 | CTRL    | Farsb        | 0.108    |
| Lrrk1        | 3.85597E-07 | 1.128323256 | 0.167 | 0.072 | 0.011973951 | CTRL    | Lrrk1        | 0.095    |
| Fam20a       | 3.88412E-07 | 2.050624623 | 0.056 | 0.009 | 0.012061356 | CTRL    | Fam20a       | 0.047    |
| Klre1        | 4.22907E-07 | 0.962554372 | 0.233 | 0.121 | 0.013132529 | CTRL    | Klre1        | 0.112    |
| Zfp330       | 6.29244E-07 | 0.794877814 | 0.217 | 0.107 | 0.019539924 | CTRL    | Zfp330       | 0.11     |
| Tmed3        | 1.41086E-06 | 0.717160804 | 0.314 | 0.192 | 0.043811536 | CTRL    | Tmed3        | 0.122    |
| Serpib9b     | 1.59759E-06 | 2.502943601 | 0.064 | 0.014 | 0.049609896 | CTRL    | Serpib9b     | 0.05     |
| Tmem106b     | 1.81107E-06 | 1.144332027 | 0.181 | 0.087 | 0.056239189 | CTRL    | Tmem106b     | 0.094    |
| Rln3         | 1.85651E-06 | 2.568647815 | 0.025 | 0     | 0.057650237 | CTRL    | Rln3         | 0.025    |
| Srfbp1       | 2.53128E-06 | 2.596169448 | 0.036 | 0.003 | 0.078603911 | CTRL    | Srfbp1       | 0.033    |
| Mrpl38       | 2.54297E-06 | 0.891178096 | 0.197 | 0.1   | 0.078966799 | CTRL    | Mrpl38       | 0.097    |
| Wdr95        | 2.5697E-06  | 0.715228426 | 0.278 | 0.158 | 0.079796755 | CTRL    | Wdr95        | 0.12     |
| Mrpl44       | 2.78452E-06 | 0.750036125 | 0.125 | 0.049 | 0.086467822 | CTRL    | Mrpl44       | 0.076    |
| Snhg12       | 2.99322E-06 | 0.745722316 | 0.336 | 0.209 | 0.092948459 | CTRL    | Snhg12       | 0.127    |
| D730003I15Ri | 3.66981E-06 | 1.928569924 | 0.047 | 0.008 | 0.113958755 | CTRL    | D730003I15Ri | 0.039    |
| Gabbr1       | 4.13964E-06 | 2.503117084 | 0.028 | 0.001 | 0.128548391 | CTRL    | Gabbr1       | 0.027    |
| Gsto1        | 5.61271E-06 | 0.792903976 | 0.267 | 0.155 | 0.174291351 | CTRL    | Gsto1        | 0.112    |
| Ss18l2       | 6.0076E-06  | 1.051414893 | 0.156 | 0.072 | 0.186554143 | CTRL    | Ss18l2       | 0.084    |
| Rnf17        | 6.99356E-06 | 2.453821386 | 0.022 | 0     | 0.217171142 | CTRL    | Rnf17        | 0.022    |
| Car6         | 7.51058E-06 | 1.157699086 | 0.119 | 0.049 | 0.233226022 | CTRL    | Car6         | 0.07     |
| Akr1b8       | 9.16362E-06 | 2.950163693 | 0.044 | 0.008 | 0.284557788 | CTRL    | Akr1b8       | 0.036    |
| Pecr         | 9.54085E-06 | 1.739687912 | 0.05  | 0.01  | 0.296272039 | CTRL    | Pecr         | 0.04     |
| Dstn         | 1.17092E-05 | 0.756013152 | 0.225 | 0.125 | 0.363604808 | CTRL    | Dstn         | 0.1      |
| Gm47662      | 1.26453E-05 | 2.18636333  | 0.067 | 0.019 | 0.392675328 | CTRL    | Gm47662      | 0.048    |
| 1810032O08R  | 1.44098E-05 | 1.13553693  | 0.106 | 0.041 | 0.447468079 | CTRL    | 1810032O08R  | 0.065    |
| Asns         | 1.59651E-05 | 1.093321669 | 0.147 | 0.07  | 0.495764763 | CTRL    | Asns         | 0.077    |
| Itn2a        | 2.0049E-05  | 1.166181258 | 0.111 | 0.045 | 0.622581065 | CTRL    | Itn2a        | 0.066    |
| Arhgef9      | 2.17987E-05 | 1.372917256 | 0.053 | 0.012 | 0.676913507 | CTRL    | Arhgef9      | 0.041    |

|             |             |             |       |       |             |      |           |       |
|-------------|-------------|-------------|-------|-------|-------------|------|-----------|-------|
| 5430416N02R | 2.39248E-05 | 1.272421978 | 0.142 | 0.069 | 0.742935683 | CTRL | 5430416N  | 0.073 |
| Polr2h      | 2.50678E-05 | 0.755797707 | 0.203 | 0.111 | 0.778429462 | CTRL | Polr2h    | 0.092 |
| Ccdc184     | 2.52197E-05 | 1.857165329 | 0.061 | 0.017 | 0.783148023 | CTRL | Ccdc184   | 0.044 |
| Sfxn1       | 2.66303E-05 | 0.764987638 | 0.194 | 0.104 | 0.826949445 | CTRL | Sfxn1     | 0.09  |
| Zfp637      | 3.00469E-05 | 2.313540944 | 0.056 | 0.014 | 0.933047165 | CTRL | Zfp637    | 0.042 |
| Serpina3f   | 3.49732E-05 | 0.837031515 | 0.092 | 0.034 | 1           | CTRL | Serpina3f | 0.058 |
| Zfp787      | 4.10936E-05 | 1.258383658 | 0.097 | 0.039 | 1           | CTRL | Zfp787    | 0.058 |
| Tmem70      | 4.49781E-05 | 0.951866735 | 0.119 | 0.053 | 1           | CTRL | Tmem70    | 0.066 |
| Tm4sf5      | 5.58053E-05 | 2.786732447 | 0.022 | 0.001 | 1           | CTRL | Tm4sf5    | 0.021 |
| Gm32051     | 5.72134E-05 | 2.244939126 | 0.022 | 0.001 | 1           | CTRL | Gm32051   | 0.021 |
| 2310039H08R | 5.9178E-05  | 1.090209394 | 0.133 | 0.064 | 1           | CTRL | 2310039H  | 0.069 |
| Podnl1      | 6.6632E-05  | 1.419710452 | 0.083 | 0.031 | 1           | CTRL | Podnl1    | 0.052 |
| Clec2i      | 6.87488E-05 | 1.156512332 | 0.072 | 0.024 | 1           | CTRL | Clec2i    | 0.048 |
| Rae1        | 7.11076E-05 | 0.76341482  | 0.236 | 0.143 | 1           | CTRL | Rae1      | 0.093 |
| A230050P20R | 7.71211E-05 | 1.539186234 | 0.044 | 0.01  | 1           | CTRL | A230050P  | 0.034 |
| Zfp516      | 8.44488E-05 | 1.949602997 | 0.025 | 0.002 | 1           | CTRL | Zfp516    | 0.023 |
| Ppp1r3g     | 8.99512E-05 | 2.505081197 | 0.039 | 0.008 | 1           | CTRL | Ppp1r3g   | 0.031 |
| Thoc3       | 9.49938E-05 | 0.786574012 | 0.15  | 0.076 | 1           | CTRL | Thoc3     | 0.074 |
| Aunip       | 0.000109265 | 1.557080509 | 0.058 | 0.018 | 1           | CTRL | Aunip     | 0.04  |
| Cd200r1     | 0.000113987 | 1.20551171  | 0.067 | 0.022 | 1           | CTRL | Cd200r1   | 0.045 |
| Cenpv       | 0.000116896 | 0.798860074 | 0.169 | 0.092 | 1           | CTRL | Cenpv     | 0.077 |
| Preli2      | 0.000118604 | 0.828661199 | 0.156 | 0.082 | 1           | CTRL | Preli2    | 0.074 |
| Chchd4      | 0.000146105 | 0.833612523 | 0.117 | 0.054 | 1           | CTRL | Chchd4    | 0.063 |
| Tctex1d2    | 0.000147539 | 1.129920363 | 0.106 | 0.048 | 1           | CTRL | Tctex1d2  | 0.058 |
| Enpp2       | 0.000149276 | 1.259167925 | 0.056 | 0.017 | 1           | CTRL | Enpp2     | 0.039 |
| Rrp1b       | 0.000149948 | 1.028421167 | 0.081 | 0.031 | 1           | CTRL | Rrp1b     | 0.05  |
| Wdr73       | 0.000154632 | 1.819221597 | 0.044 | 0.011 | 1           | CTRL | Wdr73     | 0.033 |
| Elp6        | 0.000157249 | 1.420135831 | 0.078 | 0.03  | 1           | CTRL | Elp6      | 0.048 |
| Cited1      | 0.000172299 | 1.749472381 | 0.053 | 0.015 | 1           | CTRL | Cited1    | 0.038 |
| Hdgfl3      | 0.000180185 | 1.303855056 | 0.061 | 0.02  | 1           | CTRL | Hdgfl3    | 0.041 |
| Poldip2     | 0.000182394 | 0.825900797 | 0.128 | 0.063 | 1           | CTRL | Poldip2   | 0.065 |
| Nol11       | 0.000187488 | 0.806947897 | 0.131 | 0.065 | 1           | CTRL | Nol11     | 0.066 |
| Wdr36       | 0.000196641 | 1.097553792 | 0.072 | 0.027 | 1           | CTRL | Wdr36     | 0.045 |
| Zfp951      | 0.000206077 | 2.583343201 | 0.019 | 0.001 | 1           | CTRL | Zfp951    | 0.018 |
| Rab38       | 0.000221945 | 1.417999997 | 0.058 | 0.019 | 1           | CTRL | Rab38     | 0.039 |
| Il15ra      | 0.000223339 | 1.176485378 | 0.075 | 0.029 | 1           | CTRL | Il15ra    | 0.046 |
| Hddc2       | 0.000239686 | 0.710301701 | 0.233 | 0.148 | 1           | CTRL | Hddc2     | 0.085 |
| Sucla2      | 0.000268994 | 0.778879395 | 0.131 | 0.066 | 1           | CTRL | Sucla2    | 0.065 |
| 1700019D03R | 0.00026963  | 1.742115092 | 0.036 | 0.008 | 1           | CTRL | 1700019D  | 0.028 |
| Lmo1        | 0.000274654 | 1.662979964 | 0.047 | 0.013 | 1           | CTRL | Lmo1      | 0.034 |
| Pfkfb1      | 0.000288471 | 2.306752456 | 0.022 | 0.002 | 1           | CTRL | Pfkfb1    | 0.02  |
| Spats2      | 0.000302076 | 1.08344869  | 0.067 | 0.024 | 1           | CTRL | Spats2    | 0.043 |
| Zfp617      | 0.000312958 | 1.734233969 | 0.033 | 0.007 | 1           | CTRL | Zfp617    | 0.026 |
| Tmed4       | 0.000318091 | 0.884767194 | 0.106 | 0.05  | 1           | CTRL | Tmed4     | 0.056 |
| Chmp6       | 0.000329406 | 0.857268277 | 0.144 | 0.077 | 1           | CTRL | Chmp6     | 0.067 |
| Hist1h1c    | 0.000339158 | 1.160006347 | 0.122 | 0.062 | 1           | CTRL | Hist1h1c  | 0.06  |
| Tcrg-C1     | 0.000340896 | 2.040946723 | 0.025 | 0.003 | 1           | CTRL | Tcrg-C1   | 0.022 |
| Slco2a1     | 0.000344898 | 1.540414727 | 0.025 | 0.003 | 1           | CTRL | Slco2a1   | 0.022 |
| Hist1h2bj   | 0.000348663 | 0.764030799 | 0.103 | 0.048 | 1           | CTRL | Hist1h2bj | 0.055 |
| Tmem60      | 0.000356955 | 0.826293455 | 0.094 | 0.042 | 1           | CTRL | Tmem60    | 0.052 |
| Fam78b      | 0.000358306 | 1.152869671 | 0.028 | 0.004 | 1           | CTRL | Fam78b    | 0.024 |
| Jaml        | 0.000359589 | 1.013445576 | 0.106 | 0.05  | 1           | CTRL | Jaml      | 0.056 |
| Cwf19l2     | 0.000375715 | 1.14461752  | 0.092 | 0.041 | 1           | CTRL | Cwf19l2   | 0.051 |
| Lrig3       | 0.000387856 | 2.908034252 | 0.014 | 0     | 1           | CTRL | Lrig3     | 0.014 |

|             |             |             |       |       |        |             |       |
|-------------|-------------|-------------|-------|-------|--------|-------------|-------|
| Gspt2       | 0.000387856 | 2.095903541 | 0.014 | 0     | 1 CTRL | Gspt2       | 0.014 |
| Dtd2        | 0.000392297 | 0.798212068 | 0.086 | 0.037 | 1 CTRL | Dtd2        | 0.049 |
| Ncf1        | 0.000398785 | 1.395985086 | 0.086 | 0.038 | 1 CTRL | Ncf1        | 0.048 |
| Slc35b3     | 0.000408375 | 1.035110814 | 0.092 | 0.041 | 1 CTRL | Slc35b3     | 0.051 |
| Zfand1      | 0.000517056 | 1.166214936 | 0.103 | 0.05  | 1 CTRL | Zfand1      | 0.053 |
| Ldhd        | 0.000594586 | 0.792411968 | 0.125 | 0.065 | 1 CTRL | Ldhd        | 0.06  |
| Rrp9        | 0.000629885 | 0.950723754 | 0.106 | 0.052 | 1 CTRL | Rrp9        | 0.054 |
| Cdkal1      | 0.00063234  | 1.351175845 | 0.058 | 0.021 | 1 CTRL | Cdkal1      | 0.037 |
| Tnip2       | 0.00063969  | 1.430915965 | 0.036 | 0.009 | 1 CTRL | Tnip2       | 0.027 |
| Fdft1       | 0.000652319 | 0.937682127 | 0.119 | 0.062 | 1 CTRL | Fdft1       | 0.057 |
| Ado         | 0.000661728 | 1.065857452 | 0.058 | 0.021 | 1 CTRL | Ado         | 0.037 |
| Abhd14a     | 0.000720642 | 1.790711713 | 0.069 | 0.029 | 1 CTRL | Abhd14a     | 0.04  |
| Sqle        | 0.000722831 | 1.122878956 | 0.081 | 0.035 | 1 CTRL | Sqle        | 0.046 |
| Tbcc        | 0.000739332 | 0.834010973 | 0.058 | 0.021 | 1 CTRL | Tbcc        | 0.037 |
| BC035044    | 0.000759846 | 1.721223209 | 0.033 | 0.008 | 1 CTRL | BC035044    | 0.025 |
| Bend3       | 0.000780019 | 1.563054917 | 0.017 | 0.001 | 1 CTRL | Bend3       | 0.016 |
| Gm42047     | 0.000795769 | 0.960084871 | 0.072 | 0.03  | 1 CTRL | Gm42047     | 0.042 |
| 1700037H04R | 0.000815948 | 1.224754053 | 0.05  | 0.017 | 1 CTRL | 1700037H04R | 0.033 |
| S100b       | 0.000843703 | 1.585208711 | 0.042 | 0.012 | 1 CTRL | S100b       | 0.03  |
| Timm10      | 0.000844285 | 0.707584109 | 0.131 | 0.071 | 1 CTRL | Timm10      | 0.06  |
| Zfp511      | 0.000845303 | 0.709658516 | 0.139 | 0.076 | 1 CTRL | Zfp511      | 0.063 |
| Ube2q2      | 0.000848308 | 1.365816846 | 0.069 | 0.029 | 1 CTRL | Ube2q2      | 0.04  |
| Dclk1       | 0.0008492   | 1.230270078 | 0.056 | 0.02  | 1 CTRL | Dclk1       | 0.036 |
| Pvt1        | 0.000851955 | 1.479596654 | 0.078 | 0.034 | 1 CTRL | Pvt1        | 0.044 |
| Cwc27       | 0.000939325 | 0.922631852 | 0.097 | 0.048 | 1 CTRL | Cwc27       | 0.049 |
| Tprkb       | 0.000949388 | 0.763955961 | 0.114 | 0.059 | 1 CTRL | Tprkb       | 0.055 |
| Tff1        | 0.000951133 | 0.73162779  | 0.136 | 0.076 | 1 CTRL | Tff1        | 0.06  |
| Rpf2        | 0.000958981 | 0.703913855 | 0.128 | 0.069 | 1 CTRL | Rpf2        | 0.059 |
| Ptprm       | 0.000966507 | 2.194056181 | 0.028 | 0.006 | 1 CTRL | Ptprm       | 0.022 |
| Sgo1        | 0.000981196 | 0.709522792 | 0.061 | 0.023 | 1 CTRL | Sgo1        | 0.038 |
| Mrpl50      | 0.000985344 | 0.810627444 | 0.117 | 0.062 | 1 CTRL | Mrpl50      | 0.055 |
| Smpd1       | 0.001049692 | 0.928272081 | 0.136 | 0.076 | 1 CTRL | Smpd1       | 0.06  |
| Dapk2       | 0.001062732 | 0.705979042 | 0.1   | 0.049 | 1 CTRL | Dapk2       | 0.051 |
| Osr2        | 0.001073729 | 1.894183196 | 0.025 | 0.004 | 1 CTRL | Osr2        | 0.021 |
| 5430427O19R | 0.001096197 | 1.366788    | 0.025 | 0.004 | 1 CTRL | 5430427O19R | 0.021 |
| Xkr8        | 0.001123922 | 0.799058395 | 0.022 | 0.003 | 1 CTRL | Xkr8        | 0.019 |
| Nufip1      | 0.001182909 | 0.910088703 | 0.094 | 0.046 | 1 CTRL | Nufip1      | 0.048 |
| Aatf        | 0.001199358 | 1.015598623 | 0.094 | 0.046 | 1 CTRL | Aatf        | 0.048 |
| Crcp        | 0.001206331 | 0.781221466 | 0.122 | 0.066 | 1 CTRL | Crcp        | 0.056 |
| Zfp386      | 0.001253933 | 0.869986721 | 0.081 | 0.037 | 1 CTRL | Zfp386      | 0.044 |
| Gnl2        | 0.001267135 | 0.867147315 | 0.108 | 0.056 | 1 CTRL | Gnl2        | 0.052 |
| Chmp2b      | 0.001279695 | 0.748409158 | 0.131 | 0.073 | 1 CTRL | Chmp2b      | 0.058 |
| Mospd1      | 0.00132336  | 1.208118136 | 0.044 | 0.014 | 1 CTRL | Mospd1      | 0.03  |
| Sdad1       | 0.0013248   | 0.96165149  | 0.083 | 0.039 | 1 CTRL | Sdad1       | 0.044 |
| Mfhas1      | 0.001341187 | 1.808196597 | 0.036 | 0.01  | 1 CTRL | Mfhas1      | 0.026 |
| Mphosph6    | 0.001351441 | 0.719136576 | 0.194 | 0.124 | 1 CTRL | Mphosph6    | 0.07  |
| Mrps22      | 0.001361123 | 1.056335591 | 0.089 | 0.043 | 1 CTRL | Mrps22      | 0.046 |
| Adsl        | 0.001362445 | 0.907696543 | 0.131 | 0.074 | 1 CTRL | Adsl        | 0.057 |
| Them4       | 0.001373159 | 1.382078807 | 0.036 | 0.01  | 1 CTRL | Them4       | 0.026 |
| Car9        | 0.001420582 | 0.974846077 | 0.036 | 0.01  | 1 CTRL | Car9        | 0.026 |
| Pafah1b3    | 0.001432679 | 0.7182131   | 0.161 | 0.097 | 1 CTRL | Pafah1b3    | 0.064 |
| Pym1        | 0.001482518 | 1.063589064 | 0.078 | 0.035 | 1 CTRL | Pym1        | 0.043 |
| 1700113A16R | 0.001512964 | 2.318154084 | 0.011 | 0     | 1 CTRL | 1700113A16R | 0.011 |
| Trav3-1     | 0.001512964 | 2.160011499 | 0.011 | 0     | 1 CTRL | Trav3-1     | 0.011 |

|              |             |             |       |       |        |           |       |
|--------------|-------------|-------------|-------|-------|--------|-----------|-------|
| Kctd8        | 0.001512964 | 1.583419833 | 0.011 | 0     | 1 CTRL | Kctd8     | 0.011 |
| Hist2h2be    | 0.001512964 | 1.482560931 | 0.011 | 0     | 1 CTRL | Hist2h2be | 0.011 |
| Qtrt1        | 0.001515965 | 1.282765953 | 0.064 | 0.027 | 1 CTRL | Qtrt1     | 0.037 |
| Wdr12        | 0.001543701 | 0.72489283  | 0.122 | 0.067 | 1 CTRL | Wdr12     | 0.055 |
| Ccdc115      | 0.001606029 | 0.70023669  | 0.153 | 0.092 | 1 CTRL | Ccdc115   | 0.061 |
| G6pc3        | 0.001613673 | 0.7152698   | 0.086 | 0.041 | 1 CTRL | G6pc3     | 0.045 |
| Nol10        | 0.001618022 | 0.753710276 | 0.1   | 0.051 | 1 CTRL | Nol10     | 0.049 |
| Smim4        | 0.001626215 | 0.878765822 | 0.131 | 0.075 | 1 CTRL | Smim4     | 0.056 |
| Dmxl2        | 0.001702575 | 1.345600423 | 0.033 | 0.009 | 1 CTRL | Dmxl2     | 0.024 |
| Phkg2        | 0.001707666 | 0.729165555 | 0.125 | 0.069 | 1 CTRL | Phkg2     | 0.056 |
| Apbb1        | 0.001758453 | 0.933621569 | 0.033 | 0.009 | 1 CTRL | Apbb1     | 0.024 |
| Hist1h1d     | 0.001826433 | 0.710637538 | 0.047 | 0.017 | 1 CTRL | Hist1h1d  | 0.03  |
| Fbxo6        | 0.00184277  | 0.727703758 | 0.108 | 0.058 | 1 CTRL | Fbxo6     | 0.05  |
| Zfyve19      | 0.001850298 | 0.863461998 | 0.075 | 0.034 | 1 CTRL | Zfyve19   | 0.041 |
| Ruvbl2       | 0.001854979 | 0.765797467 | 0.164 | 0.101 | 1 CTRL | Ruvbl2    | 0.063 |
| Zfp1         | 0.001880291 | 0.73434313  | 0.067 | 0.029 | 1 CTRL | Zfp1      | 0.038 |
| Grb7         | 0.001907739 | 1.005291684 | 0.047 | 0.017 | 1 CTRL | Grb7      | 0.03  |
| 2510002D24R  | 0.002007295 | 0.760507087 | 0.139 | 0.082 | 1 CTRL | 2510002D: | 0.057 |
| Pla1a        | 0.002031524 | 0.707807619 | 0.053 | 0.02  | 1 CTRL | Pla1a     | 0.033 |
| Gjb2         | 0.002107205 | 1.372897648 | 0.039 | 0.012 | 1 CTRL | Gjb2      | 0.027 |
| Klhdc4       | 0.002136533 | 0.889305277 | 0.131 | 0.075 | 1 CTRL | Klhdc4    | 0.056 |
| Met          | 0.002220072 | 0.96199541  | 0.092 | 0.046 | 1 CTRL | Met       | 0.046 |
| Mtf1         | 0.002270021 | 0.862336885 | 0.092 | 0.046 | 1 CTRL | Mtf1      | 0.046 |
| Zfp40        | 0.002431806 | 1.877632238 | 0.028 | 0.007 | 1 CTRL | Zfp40     | 0.021 |
| 2410002F23Ri | 0.002465253 | 0.837147802 | 0.097 | 0.051 | 1 CTRL | 2410002F2 | 0.046 |
| Pcyt1a       | 0.002538413 | 0.8190651   | 0.106 | 0.056 | 1 CTRL | Pcyt1a    | 0.05  |
| Diablo       | 0.002669407 | 0.742668199 | 0.114 | 0.063 | 1 CTRL | Diablo    | 0.051 |
| Bmt2         | 0.002669725 | 1.018434791 | 0.089 | 0.045 | 1 CTRL | Bmt2      | 0.044 |
| Pgm2         | 0.002687087 | 0.825891167 | 0.128 | 0.074 | 1 CTRL | Pgm2      | 0.054 |
| Bcl7a        | 0.002744539 | 2.39282374  | 0.025 | 0.006 | 1 CTRL | Bcl7a     | 0.019 |
| Lyplal1      | 0.00282846  | 2.265028121 | 0.014 | 0.001 | 1 CTRL | Lyplal1   | 0.013 |
| Zfp87        | 0.002831209 | 1.021183486 | 0.036 | 0.011 | 1 CTRL | Zfp87     | 0.025 |
| Gm30211      | 0.002841752 | 2.948529414 | 0.014 | 0.001 | 1 CTRL | Gm30211   | 0.013 |
| lqcg         | 0.002855101 | 1.827611345 | 0.014 | 0.001 | 1 CTRL | lqcg      | 0.013 |
| Rad18        | 0.002886722 | 0.869672364 | 0.089 | 0.045 | 1 CTRL | Rad18     | 0.044 |
| Nsun7        | 0.002895492 | 1.303446802 | 0.014 | 0.001 | 1 CTRL | Nsun7     | 0.013 |
| Pfkm         | 0.002909935 | 1.483401978 | 0.025 | 0.006 | 1 CTRL | Pfkm      | 0.019 |
| Arhgap35     | 0.002918887 | 0.835812755 | 0.025 | 0.006 | 1 CTRL | Arhgap35  | 0.019 |
| Asb8         | 0.002933209 | 1.091765591 | 0.053 | 0.021 | 1 CTRL | Asb8      | 0.032 |
| Tnfaip1      | 0.00294443  | 0.825377974 | 0.058 | 0.024 | 1 CTRL | Tnfaip1   | 0.034 |
| Aptx         | 0.002958838 | 1.046102722 | 0.078 | 0.038 | 1 CTRL | Aptx      | 0.04  |
| Jun          | 0.002966195 | 0.886280863 | 0.119 | 0.069 | 1 CTRL | Jun       | 0.05  |
| Map1lc3a     | 0.003005271 | 0.78975175  | 0.139 | 0.084 | 1 CTRL | Map1lc3a  | 0.055 |
| Siah1a       | 0.003022463 | 0.706633975 | 0.067 | 0.03  | 1 CTRL | Siah1a    | 0.037 |
| Dph6         | 0.003136674 | 1.405815814 | 0.064 | 0.029 | 1 CTRL | Dph6      | 0.035 |
| Klh136       | 0.003143775 | 0.768863238 | 0.042 | 0.014 | 1 CTRL | Klh136    | 0.028 |
| Gale         | 0.003147237 | 0.923844726 | 0.047 | 0.018 | 1 CTRL | Gale      | 0.029 |
| Hibadh       | 0.003181928 | 0.999464253 | 0.114 | 0.065 | 1 CTRL | Hibadh    | 0.049 |
| Bcl2l15      | 0.003195403 | 2.097786622 | 0.022 | 0.004 | 1 CTRL | Bcl2l15   | 0.018 |
| Plekhn2      | 0.003210088 | 1.362518936 | 0.064 | 0.029 | 1 CTRL | Plekhn2   | 0.035 |
| Nif3l1       | 0.003244255 | 1.011040279 | 0.061 | 0.027 | 1 CTRL | Nif3l1    | 0.034 |
| Klh126       | 0.003345635 | 0.858946701 | 0.022 | 0.004 | 1 CTRL | Klh126    | 0.018 |
| Tmem41a      | 0.003456327 | 1.963165268 | 0.019 | 0.003 | 1 CTRL | Tmem41a   | 0.016 |
| Apold1       | 0.003466884 | 1.200299798 | 0.033 | 0.01  | 1 CTRL | Apold1    | 0.023 |

|          |             |             |       |       |        |          |       |
|----------|-------------|-------------|-------|-------|--------|----------|-------|
| Dusp18   | 0.003469037 | 2.051642456 | 0.017 | 0.002 | 1 CTRL | Dusp18   | 0.015 |
| Gm6277   | 0.003481115 | 1.971928262 | 0.019 | 0.003 | 1 CTRL | Gm6277   | 0.016 |
| Bnip3    | 0.003490897 | 0.819142643 | 0.117 | 0.067 | 1 CTRL | Bnip3    | 0.05  |
| Dus4l    | 0.003496833 | 1.253137538 | 0.017 | 0.002 | 1 CTRL | Dus4l    | 0.015 |
| Rpl39l   | 0.003510806 | 1.445571014 | 0.017 | 0.002 | 1 CTRL | Rpl39l   | 0.015 |
| Habp4    | 0.003655098 | 1.209068434 | 0.05  | 0.02  | 1 CTRL | Habp4    | 0.03  |
| Zfp1     | 0.003789074 | 1.351426734 | 0.044 | 0.017 | 1 CTRL | Zfp1     | 0.027 |
| Dnajb4   | 0.003792746 | 0.800782713 | 0.103 | 0.056 | 1 CTRL | Dnajb4   | 0.047 |
| BC005561 | 0.003873992 | 0.94906078  | 0.094 | 0.051 | 1 CTRL | BC005561 | 0.043 |
| Gclm     | 0.003906736 | 0.732975515 | 0.125 | 0.074 | 1 CTRL | Gclm     | 0.051 |
| Bid      | 0.003987962 | 1.1048011   | 0.058 | 0.025 | 1 CTRL | Bid      | 0.033 |
| Atp1b1   | 0.004002107 | 1.164561778 | 0.039 | 0.013 | 1 CTRL | Atp1b1   | 0.026 |
| Nudt7    | 0.004109341 | 1.965445945 | 0.031 | 0.009 | 1 CTRL | Nudt7    | 0.022 |
| Tmem97   | 0.004320337 | 0.734645155 | 0.131 | 0.08  | 1 CTRL | Tmem97   | 0.051 |
| Eid2     | 0.004369139 | 1.076758741 | 0.031 | 0.009 | 1 CTRL | Eid2     | 0.022 |
| Popdc2   | 0.004538984 | 1.003633485 | 0.031 | 0.009 | 1 CTRL | Popdc2   | 0.022 |
| Cept1    | 0.004595321 | 0.856385703 | 0.117 | 0.067 | 1 CTRL | Cept1    | 0.05  |
| Abhd18   | 0.004746038 | 1.49604473  | 0.042 | 0.015 | 1 CTRL | Abhd18   | 0.027 |
| Ntmt1    | 0.00477179  | 0.896439415 | 0.094 | 0.052 | 1 CTRL | Ntmt1    | 0.042 |
| Rpap3    | 0.004795807 | 0.887637282 | 0.086 | 0.045 | 1 CTRL | Rpap3    | 0.041 |
| Traf3ip2 | 0.004821752 | 1.04677591  | 0.047 | 0.019 | 1 CTRL | Traf3ip2 | 0.028 |
| Riox1    | 0.004859459 | 0.705984832 | 0.069 | 0.033 | 1 CTRL | Riox1    | 0.036 |
| Poglut1  | 0.004931158 | 1.256095365 | 0.036 | 0.012 | 1 CTRL | Poglut1  | 0.024 |
| Zc3h6    | 0.005009202 | 1.506976823 | 0.036 | 0.012 | 1 CTRL | Zc3h6    | 0.024 |
| Pus1     | 0.005141766 | 0.71694404  | 0.119 | 0.07  | 1 CTRL | Pus1     | 0.049 |
| Usp40    | 0.005146226 | 2.023711048 | 0.028 | 0.008 | 1 CTRL | Usp40    | 0.02  |
| Cdc25c   | 0.005340314 | 0.967029991 | 0.028 | 0.008 | 1 CTRL | Cdc25c   | 0.02  |
| Coq5     | 0.005453587 | 1.032163019 | 0.081 | 0.042 | 1 CTRL | Coq5     | 0.039 |
| Zadh2    | 0.005510898 | 1.129616621 | 0.069 | 0.034 | 1 CTRL | Zadh2    | 0.035 |
| Ddx18    | 0.005779377 | 0.706635188 | 0.153 | 0.098 | 1 CTRL | Ddx18    | 0.055 |
| Secisbp2 | 0.005846482 | 0.719503963 | 0.092 | 0.05  | 1 CTRL | Secisbp2 | 0.042 |
| Mtmr2    | 0.005890796 | 0.717534643 | 0.097 | 0.054 | 1 CTRL | Mtmr2    | 0.043 |
| Dynlt3   | 0.005958449 | 0.728360857 | 0.117 | 0.07  | 1 CTRL | Dynlt3   | 0.047 |
| Gtf2ird1 | 0.00613214  | 0.787500099 | 0.05  | 0.021 | 1 CTRL | Gtf2ird1 | 0.029 |
| Mettl1   | 0.006170888 | 0.709723134 | 0.1   | 0.056 | 1 CTRL | Mettl1   | 0.044 |
| Tyw1     | 0.006223448 | 0.734715461 | 0.067 | 0.032 | 1 CTRL | Tyw1     | 0.035 |
| Ankrd29  | 0.006342176 | 0.890854306 | 0.033 | 0.011 | 1 CTRL | Ankrd29  | 0.022 |
| Psrc1    | 0.006415039 | 1.129770419 | 0.033 | 0.011 | 1 CTRL | Psrc1    | 0.022 |
| Rpp30    | 0.006476126 | 0.729501568 | 0.114 | 0.067 | 1 CTRL | Rpp30    | 0.047 |
| Tkfc     | 0.006521494 | 1.15980319  | 0.039 | 0.014 | 1 CTRL | Tkfc     | 0.025 |
| Nob1     | 0.006548342 | 0.801179952 | 0.089 | 0.049 | 1 CTRL | Nob1     | 0.04  |
| Gkap1    | 0.00665329  | 1.052739212 | 0.033 | 0.011 | 1 CTRL | Gkap1    | 0.022 |
| Ccdc30   | 0.006760652 | 0.968365686 | 0.039 | 0.014 | 1 CTRL | Ccdc30   | 0.025 |
| Gm12216  | 0.006841194 | 0.838669806 | 0.089 | 0.049 | 1 CTRL | Gm12216  | 0.04  |
| Neil2    | 0.006928808 | 0.93791314  | 0.025 | 0.007 | 1 CTRL | Neil2    | 0.018 |
| Cbfa2t2  | 0.006993335 | 0.91027125  | 0.039 | 0.014 | 1 CTRL | Cbfa2t2  | 0.025 |
| Hist1h4d | 0.007006466 | 0.884664635 | 0.092 | 0.051 | 1 CTRL | Hist1h4d | 0.041 |
| AI987944 | 0.007353521 | 0.845400505 | 0.053 | 0.023 | 1 CTRL | AI987944 | 0.03  |
| Npnt     | 0.007458603 | 1.152086674 | 0.047 | 0.02  | 1 CTRL | Npnt     | 0.027 |
| Dnah8    | 0.00748449  | 2.030961769 | 0.031 | 0.01  | 1 CTRL | Dnah8    | 0.021 |
| Tmem159  | 0.007825111 | 0.866777433 | 0.056 | 0.025 | 1 CTRL | Tmem159  | 0.031 |
| Egln2    | 0.007826761 | 0.971260983 | 0.111 | 0.067 | 1 CTRL | Egln2    | 0.044 |
| Ankrd33b | 0.007954818 | 1.519017976 | 0.022 | 0.006 | 1 CTRL | Ankrd33b | 0.016 |
| Cluap1   | 0.007972872 | 0.859783691 | 0.081 | 0.043 | 1 CTRL | Cluap1   | 0.038 |

|             |             |             |       |       |                 |           |       |
|-------------|-------------|-------------|-------|-------|-----------------|-----------|-------|
| Zdbf2       | 0.008070726 | 2.014805562 | 0.022 | 0.006 | 1 CTRL          | Zdbf2     | 0.016 |
| Zfp41       | 0.008117511 | 1.217078463 | 0.022 | 0.006 | 1 CTRL          | Zfp41     | 0.016 |
| Tox2        | 0.008188144 | 1.053342154 | 0.022 | 0.006 | 1 CTRL          | Tox2      | 0.016 |
| Trmt13      | 0.008218889 | 0.83136091  | 0.056 | 0.025 | 1 CTRL          | Trmt13    | 0.031 |
| Tubgcp3     | 0.008316751 | 1.249412365 | 0.089 | 0.05  | 1 CTRL          | Tubgcp3   | 0.039 |
| Eif2b3      | 0.008564274 | 0.813427439 | 0.069 | 0.035 | 1 CTRL          | Eif2b3    | 0.034 |
| Oxnad1      | 0.008696256 | 1.274021832 | 0.036 | 0.013 | 1 CTRL          | Oxnad1    | 0.023 |
| Lad1        | 0.008732469 | 1.084216415 | 0.036 | 0.013 | 1 CTRL          | Lad1      | 0.023 |
| Yars2       | 0.008841919 | 0.91438339  | 0.058 | 0.028 | 1 CTRL          | Yars2     | 0.03  |
| AC149090.1  | 0.008949604 | 0.728421897 | 0.236 | 0.175 | 1 CTRL          | AC149090. | 0.061 |
| Cog4        | 0.009048593 | 1.084272659 | 0.058 | 0.028 | 1 CTRL          | Cog4      | 0.03  |
| Aldoc       | 0.009267491 | 0.960872681 | 0.061 | 0.03  | 1 CTRL          | Aldoc     | 0.031 |
| Strn        | 0.009320223 | 0.843936111 | 0.05  | 0.022 | 1 CTRL          | Strn      | 0.028 |
| Gm17173     | 0.009421868 | 2.309874424 | 0.019 | 0.004 | 1 CTRL          | Gm17173   | 0.015 |
| Zfp992      | 0.009451012 | 1.886190086 | 0.019 | 0.004 | 1 CTRL          | Zfp992    | 0.015 |
| Rnd1        | 0.009538929 | 1.412443364 | 0.019 | 0.004 | 1 CTRL          | Rnd1      | 0.015 |
| Dclk2       | 0.00953921  | 1.262492311 | 0.053 | 0.024 | 1 CTRL          | Dclk2     | 0.029 |
| D930016D06F | 0.009568396 | 1.412298733 | 0.019 | 0.004 | 1 CTRL          | D930016D  | 0.015 |
| 5830454E08R | 0.009627573 | 1.123375935 | 0.019 | 0.004 | 1 CTRL          | 5830454E( | 0.015 |
| Fmn1        | 0.009746909 | 1.289749402 | 0.019 | 0.004 | 1 CTRL          | Fmn1      | 0.015 |
| Gga2        | 0.009826073 | 2.014872044 | 0.028 | 0.009 | 1 CTRL          | Gga2      | 0.019 |
| Crip1       | 6.79309E-29 | 1.174726357 | 0.846 | 0.692 | 2.10946E-24 M28 | Crip1     | 0.154 |
| Lyz2        | 2.30902E-17 | 3.364437346 | 0.257 | 0.05  | 7.17021E-13 M28 | Lyz2      | 0.207 |
| Plac8       | 6.98633E-13 | 0.948150743 | 0.625 | 0.45  | 2.16947E-08 M28 | Plac8     | 0.175 |
| Ifi27l2a    | 1.49336E-12 | 1.645202816 | 0.41  | 0.219 | 4.63734E-08 M28 | Ifi27l2a  | 0.191 |
| Fcer1g      | 6.25302E-11 | 2.794122555 | 0.187 | 0.044 | 1.94175E-06 M28 | Fcer1g    | 0.143 |
| Ets1        | 1.36529E-10 | 0.895278313 | 0.594 | 0.442 | 4.23964E-06 M28 | Ets1      | 0.152 |
| Ptprc       | 1.42425E-10 | 0.707158551 | 0.754 | 0.636 | 4.42273E-06 M28 | Ptprc     | 0.118 |
| Zc3hav1     | 3.18808E-10 | 0.917846936 | 0.53  | 0.361 | 9.89995E-06 M28 | Zc3hav1   | 0.169 |
| Pkp3        | 4.66919E-10 | 1.06519655  | 0.347 | 0.172 | 1.44992E-05 M28 | Pkp3      | 0.175 |
| Gzma        | 5.21825E-10 | 5.579397865 | 0.122 | 0.011 | 1.62042E-05 M28 | Gzma      | 0.111 |
| Dgat1       | 9.93123E-10 | 1.225528441 | 0.386 | 0.225 | 3.08395E-05 M28 | Dgat1     | 0.161 |
| Ccr2        | 1.18751E-09 | 2.739529105 | 0.143 | 0.025 | 3.68757E-05 M28 | Ccr2      | 0.118 |
| Ccnd2       | 1.32555E-09 | 1.449106567 | 0.344 | 0.192 | 4.11623E-05 M28 | Ccnd2     | 0.152 |
| Gm19585     | 1.10066E-08 | 1.621710479 | 0.253 | 0.114 | 0.000341788 M28 | Gm19585   | 0.139 |
| Mbnl1       | 1.7823E-08  | 0.714988222 | 0.67  | 0.556 | 0.000553457 M28 | Mbnl1     | 0.114 |
| Nfkb1       | 7.24537E-08 | 1.037519838 | 0.389 | 0.247 | 0.002249904 M28 | Nfkb1     | 0.142 |
| Neurl3      | 1.16977E-07 | 1.177268609 | 0.316 | 0.172 | 0.003632484 M28 | Neurl3    | 0.144 |
| Satb1       | 6.29007E-07 | 1.929145924 | 0.175 | 0.069 | 0.019532547 M28 | Satb1     | 0.106 |
| Rgs10       | 7.53037E-07 | 1.760193797 | 0.135 | 0.039 | 0.023384059 M28 | Rgs10     | 0.096 |
| Flt1        | 8.05441E-07 | 3.855212376 | 0.071 | 0.003 | 0.02501137 M28  | Flt1      | 0.068 |
| Il1b        | 9.37356E-07 | 2.162917186 | 0.111 | 0.025 | 0.029107723 M28 | Il1b      | 0.086 |
| Tyrobp      | 1.02252E-06 | 2.87330059  | 0.126 | 0.036 | 0.031752266 M28 | Tyrobp    | 0.09  |
| Thy1        | 1.25127E-06 | 0.732358123 | 0.648 | 0.547 | 0.03885556 M28  | Thy1      | 0.101 |
| Pik3r1      | 1.92433E-06 | 1.067300836 | 0.205 | 0.092 | 0.059756215 M28 | Pik3r1    | 0.113 |
| Spn         | 2.00649E-06 | 1.19039938  | 0.275 | 0.158 | 0.062307473 M28 | Spn       | 0.117 |
| Sla         | 4.19846E-06 | 1.257590752 | 0.25  | 0.139 | 0.130374637 M28 | Sla       | 0.111 |
| Nr3c1       | 6.07137E-06 | 1.341763278 | 0.289 | 0.181 | 0.188534146 M28 | Nr3c1     | 0.108 |
| Cxcl2       | 9.97354E-06 | 1.785865039 | 0.178 | 0.083 | 0.309708331 M28 | Cxcl2     | 0.095 |
| Spp1        | 9.98114E-06 | 2.367270468 | 0.191 | 0.097 | 0.309944298 M28 | Spp1      | 0.094 |
| Gm47283     | 1.10842E-05 | 0.846463848 | 0.478 | 0.383 | 0.344196423 M28 | Gm47283   | 0.095 |
| Dusp5       | 1.27225E-05 | 0.950655157 | 0.407 | 0.3   | 0.395072372 M28 | Dusp5     | 0.107 |
| Chd4        | 1.47983E-05 | 0.836694302 | 0.446 | 0.356 | 0.459531437 M28 | Chd4      | 0.09  |
| Lasp1       | 1.63472E-05 | 0.969801129 | 0.259 | 0.153 | 0.507628973 M28 | Lasp1     | 0.106 |

|             |             |             |       |       |             |       |             |       |
|-------------|-------------|-------------|-------|-------|-------------|-------|-------------|-------|
| Ttc7        | 1.68492E-05 | 1.98312126  | 0.121 | 0.042 | 0.523218274 | M28   | Ttc7        | 0.079 |
| Tex2        | 1.79842E-05 | 1.819847888 | 0.104 | 0.031 | 0.558463798 | M28   | Tex2        | 0.073 |
| Notch1      | 1.8262E-05  | 1.174975876 | 0.186 | 0.089 | 0.567089757 | M28   | Notch1      | 0.097 |
| Diaph1      | 1.82904E-05 | 0.802135044 | 0.372 | 0.261 | 0.567970394 | M28   | Diaph1      | 0.111 |
| Ikzf2       | 2.12655E-05 | 1.058250242 | 0.353 | 0.25  | 0.660356937 | M28   | Ikzf2       | 0.103 |
| Cbfb        | 2.55946E-05 | 1.050255737 | 0.237 | 0.133 | 0.794789181 | M28   | Cbfb        | 0.104 |
| Bcl2a1d     | 4.13733E-05 | 0.725291069 | 0.544 | 0.472 |             | 1 M28 | Bcl2a1d     | 0.072 |
| Serinc3     | 4.68992E-05 | 0.851080518 | 0.434 | 0.347 |             | 1 M28 | Serinc3     | 0.087 |
| Map4k2      | 4.79832E-05 | 1.518301465 | 0.144 | 0.064 |             | 1 M28 | Map4k2      | 0.08  |
| Plekha2     | 4.90344E-05 | 0.919541301 | 0.274 | 0.172 |             | 1 M28 | Plekha2     | 0.102 |
| Atp2b1      | 6.4285E-05  | 0.882342406 | 0.289 | 0.189 |             | 1 M28 | Atp2b1      | 0.1   |
| Saa3        | 6.87557E-05 | 3.852559149 | 0.054 | 0.006 |             | 1 M28 | Saa3        | 0.048 |
| Actr2       | 7.23479E-05 | 0.766533966 | 0.425 | 0.339 |             | 1 M28 | Actr2       | 0.086 |
| Prrc2b      | 9.47075E-05 | 0.975040063 | 0.257 | 0.161 |             | 1 M28 | Prrc2b      | 0.096 |
| Areg        | 9.69537E-05 | 1.998323982 | 0.186 | 0.103 |             | 1 M28 | Areg        | 0.083 |
| Wfdc17      | 0.000114138 | 2.098765776 | 0.067 | 0.014 |             | 1 M28 | Wfdc17      | 0.053 |
| Icos        | 0.000141332 | 0.815476238 | 0.405 | 0.311 |             | 1 M28 | Icos        | 0.094 |
| Dgkd        | 0.000143798 | 1.475148592 | 0.134 | 0.061 |             | 1 M28 | Dgkd        | 0.073 |
| Cd247       | 0.000146778 | 0.777348634 | 0.319 | 0.217 |             | 1 M28 | Cd247       | 0.102 |
| Gls         | 0.000150922 | 0.743617012 | 0.381 | 0.283 |             | 1 M28 | Gls         | 0.098 |
| Col3a1      | 0.000154413 | 4.026509527 | 0.039 | 0     |             | 1 M28 | Col3a1      | 0.039 |
| Nup210      | 0.000165221 | 1.004468111 | 0.252 | 0.161 |             | 1 M28 | Nup210      | 0.091 |
| Klf3        | 0.000170061 | 3.856160898 | 0.044 | 0.003 |             | 1 M28 | Klf3        | 0.041 |
| Cd14        | 0.000171125 | 2.5062538   | 0.065 | 0.014 |             | 1 M28 | Cd14        | 0.051 |
| Rgcc        | 0.000179928 | 1.390206251 | 0.16  | 0.083 |             | 1 M28 | Rgcc        | 0.077 |
| Nfkbid      | 0.000203846 | 1.35122863  | 0.223 | 0.142 |             | 1 M28 | Nfkbid      | 0.081 |
| Stat1       | 0.000211495 | 0.852387429 | 0.284 | 0.194 |             | 1 M28 | Stat1       | 0.09  |
| Tnfrsf1b    | 0.000224649 | 0.904488072 | 0.295 | 0.206 |             | 1 M28 | Tnfrsf1b    | 0.089 |
| Psap        | 0.000326465 | 0.758698891 | 0.355 | 0.261 |             | 1 M28 | Psap        | 0.094 |
| Pak2        | 0.000334388 | 0.97173733  | 0.319 | 0.239 |             | 1 M28 | Pak2        | 0.08  |
| Pmepa1      | 0.000337964 | 1.01387419  | 0.127 | 0.058 |             | 1 M28 | Pmepa1      | 0.069 |
| Ppp1r3b     | 0.000341966 | 2.855389621 | 0.041 | 0.003 |             | 1 M28 | Ppp1r3b     | 0.038 |
| Zfp703      | 0.000349517 | 2.526922267 | 0.07  | 0.019 |             | 1 M28 | Zfp703      | 0.051 |
| Tgfb1       | 0.000377451 | 3.954947435 | 0.034 | 0     |             | 1 M28 | Tgfb1       | 0.034 |
| Ppp2r5a     | 0.000393676 | 0.856141622 | 0.226 | 0.142 |             | 1 M28 | Ppp2r5a     | 0.084 |
| Creb1       | 0.000398134 | 1.042404028 | 0.195 | 0.114 |             | 1 M28 | Creb1       | 0.081 |
| Rbpj        | 0.000424007 | 0.818147717 | 0.35  | 0.261 |             | 1 M28 | Rbpj        | 0.089 |
| Gm42722     | 0.000430608 | 2.934773909 | 0.04  | 0.003 |             | 1 M28 | Gm42722     | 0.037 |
| Ski         | 0.000444301 | 1.026252037 | 0.116 | 0.05  |             | 1 M28 | Ski         | 0.066 |
| Srpk2       | 0.000451783 | 1.118366074 | 0.192 | 0.114 |             | 1 M28 | Srpk2       | 0.078 |
| Smarca5     | 0.000454391 | 0.718502259 | 0.396 | 0.317 |             | 1 M28 | Smarca5     | 0.079 |
| Cdk5rap1    | 0.000462426 | 2.295993788 | 0.06  | 0.014 |             | 1 M28 | Cdk5rap1    | 0.046 |
| Trp53i11    | 0.000480195 | 1.392210513 | 0.106 | 0.044 |             | 1 M28 | Trp53i11    | 0.062 |
| Anxa1       | 0.000558941 | 1.405652681 | 0.108 | 0.047 |             | 1 M28 | Anxa1       | 0.061 |
| Tspan13     | 0.000586888 | 0.751798012 | 0.215 | 0.133 |             | 1 M28 | Tspan13     | 0.082 |
| Nxpe3       | 0.000643097 | 2.171419615 | 0.049 | 0.008 |             | 1 M28 | Nxpe3       | 0.041 |
| Mob1a       | 0.000675955 | 0.851590232 | 0.259 | 0.178 |             | 1 M28 | Mob1a       | 0.081 |
| 4932438A13R | 0.000677066 | 1.058281205 | 0.202 | 0.125 |             | 1 M28 | 4932438A13R | 0.077 |
| Klrb1c      | 0.000738462 | 3.918376814 | 0.031 | 0     |             | 1 M28 | Klrb1c      | 0.031 |
| Rell1       | 0.000910102 | 1.587571114 | 0.074 | 0.025 |             | 1 M28 | Rell1       | 0.049 |
| Cish        | 0.00091683  | 1.032899085 | 0.19  | 0.117 |             | 1 M28 | Cish        | 0.073 |
| Ifitm1      | 0.000932966 | 3.227809344 | 0.046 | 0.008 |             | 1 M28 | Ifitm1      | 0.038 |
| Plec        | 0.000963542 | 0.989541155 | 0.156 | 0.086 |             | 1 M28 | Plec        | 0.07  |
| Penk        | 0.000991253 | 1.787834857 | 0.101 | 0.044 |             | 1 M28 | Penk        | 0.057 |

|           |             |             |       |       |       |          |       |
|-----------|-------------|-------------|-------|-------|-------|----------|-------|
| Thbs1     | 0.001032943 | 2.889942834 | 0.041 | 0.006 | 1 M28 | Thbs1    | 0.035 |
| Col1a1    | 0.001051971 | 2.657076368 | 0.035 | 0.003 | 1 M28 | Col1a1   | 0.032 |
| Arhgef1   | 0.001069158 | 0.710556967 | 0.324 | 0.242 | 1 M28 | Arhgef1  | 0.082 |
| Ifitm2    | 0.001077056 | 1.357362111 | 0.186 | 0.114 | 1 M28 | Ifitm2   | 0.072 |
| Agtpbp1   | 0.001131089 | 1.484770722 | 0.069 | 0.022 | 1 M28 | Agtpbp1  | 0.047 |
| Plaur     | 0.001156053 | 3.871879127 | 0.029 | 0     | 1 M28 | Plaur    | 0.029 |
| Itgal     | 0.001167103 | 0.867927561 | 0.344 | 0.275 | 1 M28 | Itgal    | 0.069 |
| Ttpal     | 0.001297816 | 2.292474574 | 0.054 | 0.014 | 1 M28 | Ttpal    | 0.04  |
| Pik3cd    | 0.001310432 | 0.8689398   | 0.149 | 0.083 | 1 M28 | Pik3cd   | 0.066 |
| Xlr4c     | 0.001386687 | 1.331352294 | 0.095 | 0.042 | 1 M28 | Xlr4c    | 0.053 |
| Ablim1    | 0.001408178 | 0.83161954  | 0.302 | 0.228 | 1 M28 | Ablim1   | 0.074 |
| Adam10    | 0.001423533 | 1.065224492 | 0.107 | 0.05  | 1 M28 | Adam10   | 0.057 |
| Mid1      | 0.001471798 | 1.357692689 | 0.08  | 0.031 | 1 M28 | Mid1     | 0.049 |
| Baz1b     | 0.001543469 | 1.085929174 | 0.196 | 0.128 | 1 M28 | Baz1b    | 0.068 |
| Ptgs2     | 0.001586487 | 3.512059493 | 0.033 | 0.003 | 1 M28 | Ptgs2    | 0.03  |
| Lcp2      | 0.001600151 | 0.866814693 | 0.246 | 0.172 | 1 M28 | Lcp2     | 0.074 |
| Cxcr4     | 0.001607625 | 1.57613778  | 0.138 | 0.078 | 1 M28 | Cxcr4    | 0.06  |
| Celf1     | 0.001609223 | 1.078967373 | 0.209 | 0.142 | 1 M28 | Celf1    | 0.067 |
| Filip1    | 0.001641715 | 1.389412263 | 0.074 | 0.028 | 1 M28 | Filip1   | 0.046 |
| Taok1     | 0.001669391 | 1.157244843 | 0.129 | 0.069 | 1 M28 | Taok1    | 0.06  |
| Grap2     | 0.001863874 | 1.003606516 | 0.258 | 0.186 | 1 M28 | Grap2    | 0.072 |
| Bcl3      | 0.001869865 | 1.795545532 | 0.073 | 0.028 | 1 M28 | Bcl3     | 0.045 |
| Gm26740   | 0.0019043   | 0.943588199 | 0.123 | 0.064 | 1 M28 | Gm26740  | 0.059 |
| Atp2b4    | 0.002017145 | 0.847501201 | 0.188 | 0.119 | 1 M28 | Atp2b4   | 0.069 |
| Fes       | 0.002060105 | 2.33431662  | 0.032 | 0.003 | 1 M28 | Fes      | 0.029 |
| Sacs      | 0.002142334 | 1.298719875 | 0.085 | 0.036 | 1 M28 | Sacs     | 0.049 |
| Rel       | 0.002191041 | 0.957133913 | 0.341 | 0.269 | 1 M28 | Rel      | 0.072 |
| Ep400     | 0.002201858 | 0.904445079 | 0.208 | 0.136 | 1 M28 | Ep400    | 0.072 |
| Cd4       | 0.002248958 | 2.135523657 | 0.064 | 0.022 | 1 M28 | Cd4      | 0.042 |
| Mpeg1     | 0.002359154 | 3.121537276 | 0.037 | 0.006 | 1 M28 | Mpeg1    | 0.031 |
| Tmem170b  | 0.002374866 | 2.208567061 | 0.046 | 0.011 | 1 M28 | Tmem170l | 0.035 |
| Rtn3      | 0.002489326 | 0.839422604 | 0.248 | 0.178 | 1 M28 | Rtn3     | 0.07  |
| Ramp1     | 0.002610557 | 1.367218001 | 0.119 | 0.064 | 1 M28 | Ramp1    | 0.055 |
| Tm9sf3    | 0.002692906 | 0.945959715 | 0.3   | 0.239 | 1 M28 | Tm9sf3   | 0.061 |
| Dot1l     | 0.00273793  | 1.015731387 | 0.17  | 0.108 | 1 M28 | Dot1l    | 0.062 |
| Snx18     | 0.00275164  | 0.947366792 | 0.207 | 0.142 | 1 M28 | Snx18    | 0.065 |
| Pla2g7    | 0.002842301 | 3.158703586 | 0.024 | 0     | 1 M28 | Pla2g7   | 0.024 |
| Col1a2    | 0.002920679 | 1.940398509 | 0.041 | 0.008 | 1 M28 | Col1a2   | 0.033 |
| D17Wsu92e | 0.003053844 | 0.944136617 | 0.134 | 0.075 | 1 M28 | D17Wsu92 | 0.059 |
| Sgpl1     | 0.003087678 | 1.388670765 | 0.086 | 0.039 | 1 M28 | Sgpl1    | 0.047 |
| Gm2a      | 0.0031052   | 0.957822295 | 0.184 | 0.119 | 1 M28 | Gm2a     | 0.065 |
| Tmem64    | 0.003131055 | 1.828151562 | 0.05  | 0.014 | 1 M28 | Tmem64   | 0.036 |
| Arl5b     | 0.003153869 | 1.66451592  | 0.093 | 0.044 | 1 M28 | Arl5b    | 0.049 |
| Itgax     | 0.003171167 | 2.66446558  | 0.03  | 0.003 | 1 M28 | Itgax    | 0.027 |
| Shoc2     | 0.003186553 | 1.899411291 | 0.07  | 0.028 | 1 M28 | Shoc2    | 0.042 |
| Tor1aip1  | 0.003283268 | 0.783000911 | 0.205 | 0.136 | 1 M28 | Tor1aip1 | 0.069 |
| Runx1     | 0.003443025 | 1.494607562 | 0.1   | 0.05  | 1 M28 | Runx1    | 0.05  |
| Iqgap2    | 0.00348102  | 1.153726241 | 0.086 | 0.039 | 1 M28 | Iqgap2   | 0.047 |
| C2cd2l    | 0.003506062 | 2.215800887 | 0.04  | 0.008 | 1 M28 | C2cd2l   | 0.032 |
| Ikzf3     | 0.003543552 | 0.877132858 | 0.202 | 0.136 | 1 M28 | Ikzf3    | 0.066 |
| Klra4     | 0.00356251  | 4.447730109 | 0.023 | 0     | 1 M28 | Klra4    | 0.023 |
| Snx9      | 0.003571995 | 1.213665875 | 0.096 | 0.047 | 1 M28 | Snx9     | 0.049 |
| Ap1g1     | 0.003791427 | 1.268696904 | 0.085 | 0.039 | 1 M28 | Ap1g1    | 0.046 |
| Socs2     | 0.003815536 | 2.219391559 | 0.034 | 0.006 | 1 M28 | Socs2    | 0.028 |



|              |             |             |       |       |   |     |           |       |
|--------------|-------------|-------------|-------|-------|---|-----|-----------|-------|
| Prdm2        | 0.00386571  | 1.329933558 | 0.085 | 0.039 | 1 | M28 | Prdm2     | 0.046 |
| Numa1        | 0.003903418 | 0.86150408  | 0.155 | 0.094 | 1 | M28 | Numa1     | 0.061 |
| Klra7        | 0.003987153 | 2.773556493 | 0.029 | 0.003 | 1 | M28 | Klra7     | 0.026 |
| Ireb2        | 0.004086055 | 1.013352977 | 0.07  | 0.028 | 1 | M28 | Ireb2     | 0.042 |
| Ass1         | 0.004116551 | 1.02584682  | 0.121 | 0.067 | 1 | M28 | Ass1      | 0.054 |
| Arl4c        | 0.004143384 | 0.846285277 | 0.1   | 0.05  | 1 | M28 | Arl4c     | 0.05  |
| Tgfbr2       | 0.004149982 | 0.833491357 | 0.201 | 0.136 | 1 | M28 | Tgfbr2    | 0.065 |
| E330009J07Ri | 0.004335397 | 1.22953725  | 0.081 | 0.036 | 1 | M28 | E330009J0 | 0.045 |
| Arhgef18     | 0.004663312 | 2.682777002 | 0.033 | 0.006 | 1 | M28 | Arhgef18  | 0.027 |
| Izumo1r      | 0.004679944 | 2.151809484 | 0.06  | 0.022 | 1 | M28 | Izumo1r   | 0.038 |
| Rnf145       | 0.004783772 | 1.138103461 | 0.076 | 0.033 | 1 | M28 | Rnf145    | 0.043 |
| Cyth1        | 0.005153406 | 0.883920269 | 0.084 | 0.039 | 1 | M28 | Cyth1     | 0.045 |
| Fam102a      | 0.005183757 | 0.845901081 | 0.192 | 0.131 | 1 | M28 | Fam102a   | 0.061 |
| Nr4a1        | 0.005198387 | 0.765575317 | 0.314 | 0.247 | 1 | M28 | Nr4a1     | 0.067 |
| Lbr          | 0.005557861 | 0.901178676 | 0.241 | 0.181 | 1 | M28 | Lbr       | 0.06  |
| Cbl          | 0.005610421 | 1.055956061 | 0.142 | 0.086 | 1 | M28 | Cbl       | 0.056 |
| Foxp4        | 0.005795137 | 1.514029625 | 0.063 | 0.025 | 1 | M28 | Foxp4     | 0.038 |
| Rab11fip1    | 0.005808768 | 0.907516414 | 0.075 | 0.033 | 1 | M28 | Rab11fip1 | 0.042 |
| Tab2         | 0.005828112 | 0.818875224 | 0.202 | 0.142 | 1 | M28 | Tab2      | 0.06  |
| Furin        | 0.005873596 | 1.29770743  | 0.14  | 0.089 | 1 | M28 | Furin     | 0.051 |
| Tgm2         | 0.005972549 | 1.80994275  | 0.032 | 0.006 | 1 | M28 | Tgm2      | 0.026 |
| Sptbn1       | 0.006025073 | 0.91235765  | 0.176 | 0.117 | 1 | M28 | Sptbn1    | 0.059 |
| Hltf         | 0.006034442 | 1.312516542 | 0.088 | 0.044 | 1 | M28 | Hltf      | 0.044 |
| Msl2         | 0.006195322 | 1.309791701 | 0.09  | 0.044 | 1 | M28 | Msl2      | 0.046 |
| Pnpla7       | 0.006212998 | 2.564657695 | 0.027 | 0.003 | 1 | M28 | Pnpla7    | 0.024 |
| Ddi2         | 0.006732982 | 1.449759433 | 0.077 | 0.036 | 1 | M28 | Ddi2      | 0.041 |
| Lgmn         | 0.00697908  | 1.355107724 | 0.077 | 0.036 | 1 | M28 | Lgmn      | 0.041 |
| Fn1          | 0.006995794 | 2.015912465 | 0.045 | 0.014 | 1 | M28 | Fn1       | 0.031 |
| Emilin2      | 0.007038168 | 3.028335393 | 0.02  | 0     | 1 | M28 | Emilin2   | 0.02  |
| Ets2         | 0.007046196 | 1.66813129  | 0.08  | 0.039 | 1 | M28 | Ets2      | 0.041 |
| Ulbp1        | 0.007263839 | 1.066774671 | 0.087 | 0.044 | 1 | M28 | Ulbp1     | 0.043 |
| C1qa         | 0.007268388 | 1.393614518 | 0.081 | 0.039 | 1 | M28 | C1qa      | 0.042 |
| Fryl         | 0.007315695 | 0.698729048 | 0.215 | 0.153 | 1 | M28 | Fryl      | 0.062 |
| Maf          | 0.007352559 | 1.05309727  | 0.095 | 0.05  | 1 | M28 | Maf       | 0.045 |
| Zfp36l1      | 0.00735825  | 0.7746037   | 0.165 | 0.106 | 1 | M28 | Zfp36l1   | 0.059 |
| Pds5b        | 0.007686389 | 0.961994708 | 0.115 | 0.067 | 1 | M28 | Pds5b     | 0.048 |
| Zfp141       | 0.007784404 | 2.270994645 | 0.025 | 0.003 | 1 | M28 | Zfp141    | 0.022 |
| Ece1         | 0.008046708 | 1.161868475 | 0.091 | 0.047 | 1 | M28 | Ece1      | 0.044 |
| Selenop      | 0.008064229 | 1.263281233 | 0.058 | 0.022 | 1 | M28 | Selenop   | 0.036 |
| Arhgef2      | 0.00812278  | 0.914483314 | 0.119 | 0.069 | 1 | M28 | Arhgef2   | 0.05  |
| Alox5ap      | 0.008125466 | 1.848430499 | 0.035 | 0.008 | 1 | M28 | Alox5ap   | 0.027 |
| Emb          | 0.008685218 | 1.118753153 | 0.268 | 0.217 | 1 | M28 | Emb       | 0.051 |
| Rap1gds1     | 0.008756857 | 1.008478228 | 0.112 | 0.064 | 1 | M28 | Rap1gds1  | 0.048 |
| Chst2        | 0.008891431 | 1.697096187 | 0.067 | 0.031 | 1 | M28 | Chst2     | 0.036 |
| Rc3h1        | 0.008971051 | 1.089416736 | 0.094 | 0.05  | 1 | M28 | Rc3h1     | 0.044 |
| Aif1         | 0.008989081 | 2.490835671 | 0.03  | 0.006 | 1 | M28 | Aif1      | 0.024 |
| Otud4        | 0.009109212 | 0.82552741  | 0.128 | 0.078 | 1 | M28 | Otud4     | 0.05  |
| Tle3         | 0.009296244 | 0.957133532 | 0.157 | 0.106 | 1 | M28 | Tle3      | 0.051 |
| Cdk17        | 0.009447633 | 1.114699822 | 0.145 | 0.094 | 1 | M28 | Cdk17     | 0.051 |
| Mki67        | 0.009602908 | 0.819428059 | 0.284 | 0.233 | 1 | M28 | Mki67     | 0.051 |
| Mdc1         | 0.009694406 | 2.161520996 | 0.024 | 0.003 | 1 | M28 | Mdc1      | 0.021 |
| Rnf149       | 0.009699466 | 0.960032195 | 0.125 | 0.078 | 1 | M28 | Rnf149    | 0.047 |
| Gcc2         | 0.009840504 | 1.072755171 | 0.064 | 0.028 | 1 | M28 | Gcc2      | 0.036 |
| Sell         | 0.009847917 | 2.076261958 | 0.034 | 0.008 | 1 | M28 | Sell      | 0.026 |

Rnf38

0.009982359 1.196449766

0.079

0.039

1 M28

Rnf38

0.04
