# Supplementary material
Source: PubMed Central journal article supplement (PMC8940682)
Supplement: NIHMS1773905-supplement-16.pdf [file NIHMS1773905-supplement-16.pdf]

**Supplemental Table 4. Gene Expression Fold Change in dendritic cells of control vs m28 treated tumors**

| gene_name | p_val       | avg_log2FC | pct.1 | pct.2 | p_val_adj   | cluster | gene    | pct.diff |
|-----------|-------------|------------|-------|-------|-------------|---------|---------|----------|
| Gapdh     | 5.32287E-29 | 1.25271576 | 1     | 0.912 | 1.65291E-24 | CTRL    | Gapdh   | 0.088    |
| Tpi1      | 5.35296E-14 | 1.70924517 | 0.717 | 0.402 | 1.66225E-09 | CTRL    | Tpi1    | 0.315    |
| Mif       | 3.88482E-11 | 1.1355464  | 0.808 | 0.583 | 1.20635E-06 | CTRL    | Mif     | 0.225    |
| Pgk1      | 5.14417E-10 | 1.27785559 | 0.697 | 0.446 | 1.59742E-05 | CTRL    | Pgk1    | 0.251    |
| Ankrd37   | 2.52408E-08 | 2.12562144 | 0.162 | 0.03  | 0.000783802 | CTRL    | Ankrd37 | 0.132    |
| Rgs1      | 2.98653E-08 | 1.42154304 | 0.556 | 0.306 | 0.000927408 | CTRL    | Rgs1    | 0.25     |
| Dct       | 3.04901E-08 | 1.15924112 | 0.606 | 0.337 | 0.000946809 | CTRL    | Dct     | 0.269    |
| Cst3      | 3.43748E-08 | 0.94170841 | 0.96  | 0.945 | 0.001067441 | CTRL    | Cst3    | 0.015    |
| Hspa1a    | 6.5964E-08  | 1.66229502 | 0.293 | 0.1   | 0.002048381 | CTRL    | Hspa1a  | 0.193    |
| Mt1       | 6.91856E-08 | 1.03972865 | 0.768 | 0.546 | 0.00214842  | CTRL    | Mt1     | 0.222    |
| Id2       | 1.06591E-07 | 1.24525233 | 0.475 | 0.23  | 0.00330996  | CTRL    | Id2     | 0.245    |
| Relt      | 4.36585E-07 | 2.17878786 | 0.162 | 0.037 | 0.013557288 | CTRL    | Relt    | 0.125    |
| Dusp4     | 6.95404E-07 | 3.67789401 | 0.061 | 0.003 | 0.021594396 | CTRL    | Dusp4   | 0.058    |
| Mt2       | 9.35323E-07 | 1.27234819 | 0.303 | 0.115 | 0.029044576 | CTRL    | Mt2     | 0.188    |
| Aurka     | 2.69788E-06 | 3.6961874  | 0.101 | 0.017 | 0.083777171 | CTRL    | Aurka   | 0.084    |
| Ldha      | 3.88762E-06 | 0.76793638 | 0.798 | 0.698 | 0.120722232 | CTRL    | Ldha    | 0.1      |
| Fbln5     | 8.81151E-06 | 3.5573291  | 0.091 | 0.015 | 0.273623968 | CTRL    | Fbln5   | 0.076    |
| Fermt2    | 8.89491E-06 | 3.57897527 | 0.071 | 0.008 | 0.276213638 | CTRL    | Fermt2  | 0.063    |
| Ecscr     | 1.27334E-05 | 4.02076402 | 0.051 | 0.003 | 0.395409721 | CTRL    | Ecscr   | 0.048    |
| Bcl2a1a   | 1.30413E-05 | 0.99810583 | 0.364 | 0.177 | 0.404970862 | CTRL    | Bcl2a1a | 0.187    |
| Gm26935   | 2.0062E-05  | 3.60588351 | 0.03  | 0     | 0.622986408 | CTRL    | Gm26935 | 0.03     |
| Myo6      | 2.38973E-05 | 3.010153   | 0.04  | 0.002 | 0.742083129 | CTRL    | Myo6    | 0.038    |
| Aldoa     | 2.47898E-05 | 0.9622544  | 0.737 | 0.639 | 0.769797609 | CTRL    | Aldoa   | 0.098    |
| B4galt7   | 3.00276E-05 | 2.49884619 | 0.061 | 0.007 | 0.932445647 | CTRL    | B4galt7 | 0.054    |
| Nudt17    | 3.03621E-05 | 3.52788455 | 0.081 | 0.013 | 0.942833663 | CTRL    | Nudt17  | 0.068    |
| Tyrrp1    | 3.38816E-05 | 0.95171123 | 0.404 | 0.215 | 1           | CTRL    | Tyrrp1  | 0.189    |
| Naa25     | 3.69914E-05 | 1.85634991 | 0.131 | 0.035 | 1           | CTRL    | Naa25   | 0.096    |
| Tuba1b    | 5.51782E-05 | 0.96556582 | 0.545 | 0.364 | 1           | CTRL    | Tuba1b  | 0.181    |
| Ifit2     | 5.87725E-05 | 2.66499042 | 0.091 | 0.018 | 1           | CTRL    | Ifit2   | 0.073    |
| Klf6      | 6.77796E-05 | 1.17096528 | 0.505 | 0.319 | 1           | CTRL    | Klf6    | 0.186    |
| Higd1a    | 7.27413E-05 | 1.20253929 | 0.515 | 0.344 | 1           | CTRL    | Higd1a  | 0.171    |
| Pfcp      | 7.28514E-05 | 0.88681116 | 0.596 | 0.447 | 1           | CTRL    | Pfcp    | 0.149    |
| Cdk1      | 8.25693E-05 | 2.00336755 | 0.182 | 0.067 | 1           | CTRL    | Cdk1    | 0.115    |
| Ccl17     | 9.38689E-05 | 2.54260993 | 0.111 | 0.028 | 1           | CTRL    | Ccl17   | 0.083    |
| Sapcd2    | 0.000111802 | 2.49947828 | 0.061 | 0.008 | 1           | CTRL    | Sapcd2  | 0.053    |
| Ccl22     | 0.000114415 | 2.16484583 | 0.162 | 0.057 | 1           | CTRL    | Ccl22   | 0.105    |
| Preli2    | 0.000115478 | 1.40352342 | 0.162 | 0.053 | 1           | CTRL    | Preli2  | 0.109    |
| Sept3     | 0.000116159 | 1.30257411 | 0.192 | 0.073 | 1           | CTRL    | Sept3   | 0.119    |
| Acsf3     | 0.000117652 | 1.83472228 | 0.061 | 0.008 | 1           | CTRL    | Acsf3   | 0.053    |
| mt-Atp8   | 0.000119214 | 1.31331233 | 0.788 | 0.614 | 1           | CTRL    | mt-Atp8 | 0.174    |
| Actn1     | 0.000141762 | 1.17795774 | 0.212 | 0.085 | 1           | CTRL    | Actn1   | 0.127    |
| Csrp1     | 0.000146399 | 0.97504182 | 0.444 | 0.259 | 1           | CTRL    | Csrp1   | 0.185    |
| Wdr75     | 0.000185056 | 2.19935014 | 0.101 | 0.025 | 1           | CTRL    | Wdr75   | 0.076    |
| Il12b     | 0.000187532 | 1.98306915 | 0.101 | 0.025 | 1           | CTRL    | Il12b   | 0.076    |
| Scarf2    | 0.000221575 | 1.80289859 | 0.04  | 0.003 | 1           | CTRL    | Scarf2  | 0.037    |
| Fam133b   | 0.000229677 | 1.39803795 | 0.182 | 0.067 | 1           | CTRL    | Fam133b | 0.115    |
| Mul1      | 0.000273372 | 2.10058444 | 0.071 | 0.013 | 1           | CTRL    | Mul1    | 0.058    |
| Fos       | 0.000274299 | 1.16587663 | 0.455 | 0.309 | 1           | CTRL    | Fos     | 0.146    |
| Trmt1     | 0.000293667 | 1.52576972 | 0.172 | 0.065 | 1           | CTRL    | Trmt1   | 0.107    |

|             |             |            |       |       |        |             |       |
|-------------|-------------|------------|-------|-------|--------|-------------|-------|
| Bcl2l14     | 0.000310058 | 1.445136   | 0.152 | 0.053 | 1 CTRL | Bcl2l14     | 0.099 |
| Hgh1        | 0.000330095 | 3.70429537 | 0.051 | 0.007 | 1 CTRL | Hgh1        | 0.044 |
| Rab13       | 0.000361631 | 2.4478088  | 0.061 | 0.01  | 1 CTRL | Rab13       | 0.051 |
| Nek1        | 0.000366745 | 2.28547615 | 0.051 | 0.007 | 1 CTRL | Nek1        | 0.044 |
| Wbp1        | 0.000375901 | 1.26604518 | 0.121 | 0.037 | 1 CTRL | Wbp1        | 0.084 |
| Sult1a1     | 0.000399639 | 0.94740159 | 0.061 | 0.01  | 1 CTRL | Sult1a1     | 0.051 |
| Anxa4       | 0.000443533 | 1.26082595 | 0.253 | 0.124 | 1 CTRL | Anxa4       | 0.129 |
| Arrdc4      | 0.000445109 | 1.24790366 | 0.192 | 0.077 | 1 CTRL | Arrdc4      | 0.115 |
| Clu         | 0.000468725 | 4.44303452 | 0.03  | 0.002 | 1 CTRL | Clu         | 0.028 |
| Wdr19       | 0.000468725 | 3.28866097 | 0.03  | 0.002 | 1 CTRL | Wdr19       | 0.028 |
| Troap       | 0.000483401 | 2.87672256 | 0.03  | 0.002 | 1 CTRL | Troap       | 0.028 |
| Fzd7        | 0.000490898 | 2.89006223 | 0.03  | 0.002 | 1 CTRL | Fzd7        | 0.028 |
| Trabd2b     | 0.000490898 | 1.88953992 | 0.03  | 0.002 | 1 CTRL | Trabd2b     | 0.028 |
| Lyz1        | 0.000490898 | 1.84740769 | 0.03  | 0.002 | 1 CTRL | Lyz1        | 0.028 |
| Hist1h1c    | 0.000492116 | 1.37759871 | 0.202 | 0.087 | 1 CTRL | Hist1h1c    | 0.115 |
| Capn6       | 0.000504719 | 4.48302721 | 0.02  | 0     | 1 CTRL | Capn6       | 0.02  |
| Cubn        | 0.000504719 | 3.77242187 | 0.02  | 0     | 1 CTRL | Cubn        | 0.02  |
| Tesmin      | 0.000504719 | 3.31347894 | 0.02  | 0     | 1 CTRL | Tesmin      | 0.02  |
| Mblac2      | 0.000504719 | 3.28999526 | 0.02  | 0     | 1 CTRL | Mblac2      | 0.02  |
| Loxl2       | 0.000504719 | 3.25598977 | 0.02  | 0     | 1 CTRL | Loxl2       | 0.02  |
| Rab26       | 0.000504719 | 3.20382024 | 0.02  | 0     | 1 CTRL | Rab26       | 0.02  |
| A230083N12F | 0.000504719 | 3.05843452 | 0.02  | 0     | 1 CTRL | A230083N12  | 0.02  |
| Cdkl5       | 0.000504719 | 2.83350322 | 0.02  | 0     | 1 CTRL | Cdkl5       | 0.02  |
| Slc22a4     | 0.000504719 | 2.74456881 | 0.02  | 0     | 1 CTRL | Slc22a4     | 0.02  |
| Ccsap       | 0.000504719 | 2.3334399  | 0.02  | 0     | 1 CTRL | Ccsap       | 0.02  |
| Gm5475      | 0.000504719 | 2.13359783 | 0.02  | 0     | 1 CTRL | Gm5475      | 0.02  |
| Atad3a      | 0.000515071 | 1.75835109 | 0.091 | 0.023 | 1 CTRL | Atad3a      | 0.068 |
| Cd274       | 0.000539611 | 0.97927152 | 0.283 | 0.145 | 1 CTRL | Cd274       | 0.138 |
| Fscn1       | 0.000562719 | 1.65472877 | 0.162 | 0.063 | 1 CTRL | Fscn1       | 0.099 |
| Tuba1a      | 0.000571687 | 1.17416509 | 0.485 | 0.321 | 1 CTRL | Tuba1a      | 0.164 |
| Cdca8       | 0.000618379 | 1.5686762  | 0.162 | 0.063 | 1 CTRL | Cdca8       | 0.099 |
| Pi4k2a      | 0.000632767 | 1.57548451 | 0.232 | 0.114 | 1 CTRL | Pi4k2a      | 0.118 |
| Mocs2       | 0.000715893 | 1.3910773  | 0.131 | 0.045 | 1 CTRL | Mocs2       | 0.086 |
| Ptgds       | 0.00072856  | 1.08728484 | 0.293 | 0.155 | 1 CTRL | Ptgds       | 0.138 |
| Sept2       | 0.000815169 | 2.87048039 | 0.061 | 0.012 | 1 CTRL | Sept2       | 0.049 |
| Tnf         | 0.000828305 | 1.23463131 | 0.141 | 0.052 | 1 CTRL | Tnf         | 0.089 |
| Atf3        | 0.000878331 | 1.15292747 | 0.394 | 0.25  | 1 CTRL | Atf3        | 0.144 |
| Gfm1        | 0.000891445 | 2.08413666 | 0.101 | 0.03  | 1 CTRL | Gfm1        | 0.071 |
| 1810055G02R | 0.000892727 | 1.78510587 | 0.061 | 0.012 | 1 CTRL | 1810055G02I | 0.049 |
| Cacnb3      | 0.000939577 | 1.54503519 | 0.152 | 0.06  | 1 CTRL | Cacnb3      | 0.092 |
| Sectm1a     | 0.001016921 | 2.61566168 | 0.051 | 0.008 | 1 CTRL | Sectm1a     | 0.043 |
| Mgarp       | 0.001045599 | 2.64167355 | 0.051 | 0.008 | 1 CTRL | Mgarp       | 0.043 |
| Sgo1        | 0.001050667 | 2.89013015 | 0.04  | 0.005 | 1 CTRL | Sgo1        | 0.035 |
| Fbxo44      | 0.001074105 | 2.38374996 | 0.04  | 0.005 | 1 CTRL | Fbxo44      | 0.035 |
| H1f0        | 0.001074371 | 1.33867388 | 0.202 | 0.093 | 1 CTRL | H1f0        | 0.109 |
| Gpsm2       | 0.001134833 | 1.41542916 | 0.04  | 0.005 | 1 CTRL | Gpsm2       | 0.035 |
| Tmub1       | 0.001165961 | 1.1278109  | 0.111 | 0.035 | 1 CTRL | Tmub1       | 0.076 |
| Pmel        | 0.001169109 | 0.81612073 | 0.404 | 0.265 | 1 CTRL | Pmel        | 0.139 |
| Exosc4      | 0.001170418 | 1.17049435 | 0.182 | 0.08  | 1 CTRL | Exosc4      | 0.102 |
| Stk39       | 0.001178065 | 2.38384585 | 0.071 | 0.017 | 1 CTRL | Stk39       | 0.054 |
| Mettl9      | 0.001306415 | 1.45925703 | 0.202 | 0.093 | 1 CTRL | Mettl9      | 0.109 |

|             |             |            |       |       |        |             |       |
|-------------|-------------|------------|-------|-------|--------|-------------|-------|
| Myl12a      | 0.001487639 | 0.72598099 | 0.687 | 0.578 | 1 CTRL | Myl12a      | 0.109 |
| Gadd45g     | 0.001494675 | 1.02837745 | 0.202 | 0.095 | 1 CTRL | Gadd45g     | 0.107 |
| Fkbp5       | 0.001546207 | 0.93740733 | 0.192 | 0.085 | 1 CTRL | Fkbp5       | 0.107 |
| Tubb6       | 0.001552952 | 1.05975763 | 0.273 | 0.147 | 1 CTRL | Tubb6       | 0.126 |
| Smyd2       | 0.001630982 | 1.50059541 | 0.091 | 0.027 | 1 CTRL | Smyd2       | 0.064 |
| Syt4        | 0.001669267 | 1.30352091 | 0.131 | 0.048 | 1 CTRL | Syt4        | 0.083 |
| Klhdc2      | 0.001942575 | 1.49079566 | 0.162 | 0.07  | 1 CTRL | Klhdc2      | 0.092 |
| Cryab       | 0.00202814  | 1.68570224 | 0.121 | 0.045 | 1 CTRL | Cryab       | 0.076 |
| Bnip3       | 0.002072962 | 1.96589129 | 0.131 | 0.052 | 1 CTRL | Bnip3       | 0.079 |
| Parp6       | 0.002142519 | 1.32070769 | 0.061 | 0.013 | 1 CTRL | Parp6       | 0.048 |
| Car6        | 0.00215131  | 1.52370724 | 0.121 | 0.045 | 1 CTRL | Car6        | 0.076 |
| Vdac1       | 0.002152507 | 0.79982127 | 0.404 | 0.255 | 1 CTRL | Vdac1       | 0.149 |
| Bysl        | 0.002273127 | 1.82901411 | 0.091 | 0.028 | 1 CTRL | Bysl        | 0.063 |
| A630072M18I | 0.002309578 | 2.30282684 | 0.071 | 0.018 | 1 CTRL | A630072M18I | 0.053 |
| Ipo8        | 0.002355159 | 2.35657905 | 0.071 | 0.018 | 1 CTRL | Ipo8        | 0.053 |
| Eif2b2      | 0.00251272  | 1.01558802 | 0.242 | 0.125 | 1 CTRL | Eif2b2      | 0.117 |
| Akr1b10     | 0.002545837 | 1.66202796 | 0.071 | 0.018 | 1 CTRL | Akr1b10     | 0.053 |
| Plpp1       | 0.002595377 | 1.51482787 | 0.111 | 0.04  | 1 CTRL | Plpp1       | 0.071 |
| Zfp653      | 0.002695701 | 3.0873848  | 0.051 | 0.01  | 1 CTRL | Zfp653      | 0.041 |
| Plat        | 0.002695701 | 2.06383273 | 0.051 | 0.01  | 1 CTRL | Plat        | 0.041 |
| Tspan4      | 0.00273277  | 1.1923677  | 0.081 | 0.023 | 1 CTRL | Tspan4      | 0.058 |
| 1700056E22R | 0.002785341 | 2.03419182 | 0.051 | 0.01  | 1 CTRL | 1700056E22R | 0.041 |
| Ifi205      | 0.002859646 | 0.84779826 | 0.283 | 0.154 | 1 CTRL | Ifi205      | 0.129 |
| Pfkl        | 0.002966677 | 1.13100872 | 0.212 | 0.105 | 1 CTRL | Pfkl        | 0.107 |
| Synpo2      | 0.003135178 | 3.09989395 | 0.03  | 0.003 | 1 CTRL | Synpo2      | 0.027 |
| Rlim        | 0.00316726  | 1.16148167 | 0.192 | 0.09  | 1 CTRL | Rlim        | 0.102 |
| Dok1        | 0.003180836 | 0.87343726 | 0.172 | 0.077 | 1 CTRL | Dok1        | 0.095 |
| Fndc7       | 0.003210844 | 2.74406324 | 0.03  | 0.003 | 1 CTRL | Fndc7       | 0.027 |
| Tmem161b    | 0.003210844 | 2.39157734 | 0.03  | 0.003 | 1 CTRL | Tmem161b    | 0.027 |
| Trib3       | 0.003249297 | 2.69908498 | 0.03  | 0.003 | 1 CTRL | Trib3       | 0.027 |
| Rnd2        | 0.003249297 | 2.67894045 | 0.03  | 0.003 | 1 CTRL | Rnd2        | 0.027 |
| 5730409E04R | 0.003249297 | 2.59863775 | 0.03  | 0.003 | 1 CTRL | 5730409E04R | 0.027 |
| Htra3       | 0.00328817  | 2.29583261 | 0.03  | 0.003 | 1 CTRL | Htra3       | 0.027 |
| Mcm8        | 0.00328817  | 2.28998837 | 0.03  | 0.003 | 1 CTRL | Mcm8        | 0.027 |
| Proser2     | 0.003327466 | 1.6764409  | 0.03  | 0.003 | 1 CTRL | Proser2     | 0.027 |
| Gm12981     | 0.003367189 | 1.75598658 | 0.03  | 0.003 | 1 CTRL | Gm12981     | 0.027 |
| AC163040.1  | 0.003367189 | 1.24351742 | 0.03  | 0.003 | 1 CTRL | AC163040.1  | 0.027 |
| Zc2hc1a     | 0.003405389 | 3.52296475 | 0.04  | 0.007 | 1 CTRL | Zc2hc1a     | 0.033 |
| Optn        | 0.003409812 | 2.4563859  | 0.061 | 0.015 | 1 CTRL | Optn        | 0.046 |
| Chtf18      | 0.003502534 | 3.13626429 | 0.04  | 0.007 | 1 CTRL | Chtf18      | 0.033 |
| Gm13205     | 0.003568691 | 2.02659947 | 0.04  | 0.007 | 1 CTRL | Gm13205     | 0.033 |
| Ebi3        | 0.00359685  | 1.40819704 | 0.152 | 0.067 | 1 CTRL | Ebi3        | 0.085 |
| Nsmce3      | 0.003623459 | 1.70269375 | 0.152 | 0.067 | 1 CTRL | Nsmce3      | 0.085 |
| Gpatch3     | 0.00367006  | 1.56648404 | 0.04  | 0.007 | 1 CTRL | Gpatch3     | 0.033 |
| Tfap4       | 0.00367006  | 1.49425281 | 0.04  | 0.007 | 1 CTRL | Tfap4       | 0.033 |
| Dnajb5      | 0.00367006  | 1.41345956 | 0.04  | 0.007 | 1 CTRL | Dnajb5      | 0.033 |
| Slc25a38    | 0.003672613 | 0.75882307 | 0.192 | 0.092 | 1 CTRL | Slc25a38    | 0.1   |
| Zfp275      | 0.003704427 | 1.16730818 | 0.04  | 0.007 | 1 CTRL | Zfp275      | 0.033 |
| Baiap2      | 0.003762247 | 0.74922337 | 0.162 | 0.072 | 1 CTRL | Baiap2      | 0.09  |
| Ndrp1       | 0.003799001 | 1.24618299 | 0.273 | 0.162 | 1 CTRL | Ndrp1       | 0.111 |
| Gba2        | 0.003805118 | 1.80964108 | 0.061 | 0.015 | 1 CTRL | Gba2        | 0.046 |

|             |             |            |       |       |        |             |       |
|-------------|-------------|------------|-------|-------|--------|-------------|-------|
| Hist2h2aa1  | 0.00380929  | 1.25937016 | 0.04  | 0.007 | 1 CTRL | Hist2h2aa1  | 0.033 |
| Mgat4b      | 0.003812308 | 1.31502162 | 0.162 | 0.075 | 1 CTRL | Mgat4b      | 0.087 |
| Kdm4b       | 0.003883717 | 2.15832455 | 0.061 | 0.015 | 1 CTRL | Kdm4b       | 0.046 |
| Spata2      | 0.003920089 | 0.97358776 | 0.121 | 0.047 | 1 CTRL | Spata2      | 0.074 |
| Mtf1        | 0.004071911 | 1.43616148 | 0.081 | 0.025 | 1 CTRL | Mtf1        | 0.056 |
| Tmem39a     | 0.004130949 | 1.2212676  | 0.141 | 0.062 | 1 CTRL | Tmem39a     | 0.079 |
| Chmp6       | 0.004151847 | 1.24487542 | 0.172 | 0.078 | 1 CTRL | Chmp6       | 0.094 |
| Exosc9      | 0.004183546 | 0.78685708 | 0.162 | 0.072 | 1 CTRL | Exosc9      | 0.09  |
| Phactr4     | 0.004241636 | 1.85509761 | 0.061 | 0.015 | 1 CTRL | Phactr4     | 0.046 |
| Vps41       | 0.004422295 | 0.90116008 | 0.172 | 0.08  | 1 CTRL | Vps41       | 0.092 |
| Ccdc43      | 0.00451873  | 1.59679614 | 0.081 | 0.025 | 1 CTRL | Ccdc43      | 0.056 |
| Rrp36       | 0.004618278 | 1.01711462 | 0.081 | 0.025 | 1 CTRL | Rrp36       | 0.056 |
| Chchd10     | 0.004650899 | 1.05436617 | 0.273 | 0.159 | 1 CTRL | Chchd10     | 0.114 |
| Glipr2      | 0.004767123 | 1.51118817 | 0.182 | 0.092 | 1 CTRL | Glipr2      | 0.09  |
| Stx17       | 0.004799039 | 1.55806322 | 0.101 | 0.037 | 1 CTRL | Stx17       | 0.064 |
| Metrn       | 0.004884535 | 1.57719218 | 0.111 | 0.043 | 1 CTRL | Metrn       | 0.068 |
| Bag6        | 0.0049013   | 1.14956394 | 0.242 | 0.139 | 1 CTRL | Bag6        | 0.103 |
| Clec9a      | 0.004936772 | 1.08595256 | 0.192 | 0.093 | 1 CTRL | Clec9a      | 0.099 |
| Gyg         | 0.004943963 | 0.70111135 | 0.354 | 0.219 | 1 CTRL | Gyg         | 0.135 |
| Hspa1b      | 0.005006345 | 1.67367366 | 0.131 | 0.057 | 1 CTRL | Hspa1b      | 0.074 |
| Cnot11      | 0.005073068 | 0.92308552 | 0.121 | 0.048 | 1 CTRL | Cnot11      | 0.073 |
| Psm11       | 0.0054417   | 0.86960054 | 0.333 | 0.215 | 1 CTRL | Psm11       | 0.118 |
| Pcbp4       | 0.005729786 | 2.90770502 | 0.071 | 0.022 | 1 CTRL | Pcbp4       | 0.049 |
| Arhgap22    | 0.005874655 | 2.06626075 | 0.141 | 0.062 | 1 CTRL | Arhgap22    | 0.079 |
| Plet1       | 0.006004386 | 0.72281504 | 0.141 | 0.062 | 1 CTRL | Plet1       | 0.079 |
| Wdr91       | 0.00603538  | 1.45451353 | 0.091 | 0.032 | 1 CTRL | Wdr91       | 0.059 |
| Serpina3g   | 0.00611024  | 1.50656986 | 0.192 | 0.1   | 1 CTRL | Serpina3g   | 0.092 |
| Calcoco1    | 0.006123291 | 1.08762109 | 0.091 | 0.032 | 1 CTRL | Calcoco1    | 0.059 |
| Slc8b1      | 0.006159519 | 0.9368563  | 0.242 | 0.134 | 1 CTRL | Slc8b1      | 0.108 |
| Lpin1       | 0.006212354 | 1.44628683 | 0.091 | 0.032 | 1 CTRL | Lpin1       | 0.059 |
| 4833420G17R | 0.006259039 | 0.89238882 | 0.152 | 0.068 | 1 CTRL | 4833420G17I | 0.084 |
| Lrrc57      | 0.006352229 | 1.33256883 | 0.051 | 0.012 | 1 CTRL | Lrrc57      | 0.039 |
| Tpgs2       | 0.006580384 | 1.52311688 | 0.091 | 0.032 | 1 CTRL | Tpgs2       | 0.059 |
| Brms1       | 0.006594205 | 0.81592071 | 0.192 | 0.097 | 1 CTRL | Brms1       | 0.095 |
| Rgs10       | 0.006662273 | 0.82884579 | 0.465 | 0.334 | 1 CTRL | Rgs10       | 0.131 |
| Tyw1        | 0.006713574 | 2.10233586 | 0.071 | 0.022 | 1 CTRL | Tyw1        | 0.049 |
| Cenpf       | 0.006812806 | 1.61524803 | 0.081 | 0.027 | 1 CTRL | Cenpf       | 0.054 |
| Nt5c2       | 0.007032078 | 1.2578044  | 0.162 | 0.078 | 1 CTRL | Nt5c2       | 0.084 |
| Eno1        | 0.007220817 | 0.78528256 | 0.535 | 0.424 | 1 CTRL | Eno1        | 0.111 |
| Mlycd       | 0.007260152 | 1.47273993 | 0.061 | 0.017 | 1 CTRL | Mlycd       | 0.044 |
| Tbc1d4      | 0.007272846 | 0.86844386 | 0.323 | 0.205 | 1 CTRL | Tbc1d4      | 0.118 |
| Wdr5        | 0.007465034 | 0.90547362 | 0.071 | 0.022 | 1 CTRL | Wdr5        | 0.049 |
| Zfr         | 0.007470133 | 1.39556037 | 0.152 | 0.072 | 1 CTRL | Zfr         | 0.08  |
| Papd4       | 0.00792953  | 0.77297214 | 0.232 | 0.127 | 1 CTRL | Papd4       | 0.105 |
| Ammecr1l    | 0.007932616 | 1.26323819 | 0.091 | 0.033 | 1 CTRL | Ammecr1l    | 0.058 |
| Eif1ad      | 0.008025064 | 0.92961602 | 0.222 | 0.119 | 1 CTRL | Eif1ad      | 0.103 |
| Faap20      | 0.008274098 | 1.38558664 | 0.131 | 0.058 | 1 CTRL | Faap20      | 0.073 |
| Nsun6       | 0.008550647 | 3.008651   | 0.04  | 0.008 | 1 CTRL | Nsun6       | 0.032 |
| Dstn        | 0.00857142  | 0.88244091 | 0.273 | 0.162 | 1 CTRL | Dstn        | 0.111 |
| Bhlhe41     | 0.008975245 | 1.97786246 | 0.04  | 0.008 | 1 CTRL | Bhlhe41     | 0.032 |
| 1700037H04R | 0.008975245 | 1.3461774  | 0.04  | 0.008 | 1 CTRL | 1700037H04I | 0.032 |

|             |             |            |       |       |             |        |             |       |
|-------------|-------------|------------|-------|-------|-------------|--------|-------------|-------|
| Syn3        | 0.00900924  | 3.62300838 | 0.02  | 0.002 |             | 1 CTRL | Syn3        | 0.018 |
| Sfxn4       | 0.00900924  | 3.38277636 | 0.02  | 0.002 |             | 1 CTRL | Sfxn4       | 0.018 |
| Ccno        | 0.00900924  | 3.31387947 | 0.02  | 0.002 |             | 1 CTRL | Ccno        | 0.018 |
| Eps8l1      | 0.00900924  | 2.72986639 | 0.02  | 0.002 |             | 1 CTRL | Eps8l1      | 0.018 |
| Pmp22       | 0.00900924  | 2.71058906 | 0.02  | 0.002 |             | 1 CTRL | Pmp22       | 0.018 |
| Ctrl        | 0.00900924  | 2.6876311  | 0.02  | 0.002 |             | 1 CTRL | Ctrl        | 0.018 |
| Epn2        | 0.00900924  | 2.68475221 | 0.02  | 0.002 |             | 1 CTRL | Epn2        | 0.018 |
| Lyplal1     | 0.00900924  | 2.67278262 | 0.02  | 0.002 |             | 1 CTRL | Lyplal1     | 0.018 |
| Dhrs9       | 0.00900924  | 2.21231859 | 0.02  | 0.002 |             | 1 CTRL | Dhrs9       | 0.018 |
| Il17b       | 0.00900924  | 2.11506443 | 0.02  | 0.002 |             | 1 CTRL | Il17b       | 0.018 |
| Dnal1       | 0.00900924  | 1.85604747 | 0.02  | 0.002 |             | 1 CTRL | Dnal1       | 0.018 |
| Slc2a4      | 0.009135142 | 3.5302438  | 0.02  | 0.002 |             | 1 CTRL | Slc2a4      | 0.018 |
| Rab39       | 0.009135142 | 3.47094288 | 0.02  | 0.002 |             | 1 CTRL | Rab39       | 0.018 |
| Alx1        | 0.009135142 | 3.27458482 | 0.02  | 0.002 |             | 1 CTRL | Alx1        | 0.018 |
| Dsn1        | 0.009135142 | 2.99359189 | 0.02  | 0.002 |             | 1 CTRL | Dsn1        | 0.018 |
| Ttk         | 0.009135142 | 2.85373069 | 0.02  | 0.002 |             | 1 CTRL | Ttk         | 0.018 |
| Gm26669     | 0.009135142 | 2.64020944 | 0.02  | 0.002 |             | 1 CTRL | Gm26669     | 0.018 |
| Gm19590     | 0.009135142 | 2.59353794 | 0.02  | 0.002 |             | 1 CTRL | Gm19590     | 0.018 |
| Eid2        | 0.009135142 | 2.58733291 | 0.02  | 0.002 |             | 1 CTRL | Eid2        | 0.018 |
| Atad3aos    | 0.009135142 | 2.47666621 | 0.02  | 0.002 |             | 1 CTRL | Atad3aos    | 0.018 |
| Rem1        | 0.009135142 | 2.46186939 | 0.02  | 0.002 |             | 1 CTRL | Rem1        | 0.018 |
| 1700109H08R | 0.009135142 | 2.45335291 | 0.02  | 0.002 |             | 1 CTRL | 1700109H08I | 0.018 |
| Rab17       | 0.009135142 | 2.33397522 | 0.02  | 0.002 |             | 1 CTRL | Rab17       | 0.018 |
| Tspyl3      | 0.009135142 | 2.17778176 | 0.02  | 0.002 |             | 1 CTRL | Tspyl3      | 0.018 |
| Aunip       | 0.009135142 | 2.06827953 | 0.02  | 0.002 |             | 1 CTRL | Aunip       | 0.018 |
| BC002059    | 0.009194525 | 1.70419281 | 0.04  | 0.008 |             | 1 CTRL | BC002059    | 0.032 |
| Ephx1       | 0.009262614 | 1.89829998 | 0.02  | 0.002 |             | 1 CTRL | Ephx1       | 0.018 |
| Arpin       | 0.009262614 | 1.81562754 | 0.02  | 0.002 |             | 1 CTRL | Arpin       | 0.018 |
| Gm15441     | 0.009262614 | 1.80236068 | 0.02  | 0.002 |             | 1 CTRL | Gm15441     | 0.018 |
| Mpzl2       | 0.009262614 | 1.72598761 | 0.02  | 0.002 |             | 1 CTRL | Mpzl2       | 0.018 |
| Recql4      | 0.009262614 | 1.62021226 | 0.02  | 0.002 |             | 1 CTRL | Recql4      | 0.018 |
| Btbd6       | 0.009262614 | 1.52550336 | 0.02  | 0.002 |             | 1 CTRL | Btbd6       | 0.018 |
| 2610008E11R | 0.009262614 | 1.52333964 | 0.02  | 0.002 |             | 1 CTRL | 2610008E11F | 0.018 |
| Clic5       | 0.009262614 | 1.51461997 | 0.02  | 0.002 |             | 1 CTRL | Clic5       | 0.018 |
| Hic1        | 0.009262614 | 1.40532054 | 0.02  | 0.002 |             | 1 CTRL | Hic1        | 0.018 |
| Stard8      | 0.009262614 | 1.05251028 | 0.02  | 0.002 |             | 1 CTRL | Stard8      | 0.018 |
| Nacc1       | 0.00937431  | 1.252261   | 0.111 | 0.047 |             | 1 CTRL | Nacc1       | 0.064 |
| Mrto4       | 0.009491312 | 0.96228847 | 0.232 | 0.129 |             | 1 CTRL | Mrto4       | 0.103 |
| Pdcd11      | 0.009517919 | 1.8912627  | 0.101 | 0.04  |             | 1 CTRL | Pdcd11      | 0.061 |
| 1810043G02R | 0.009784796 | 1.32020593 | 0.121 | 0.053 |             | 1 CTRL | 1810043G02I | 0.068 |
| Qpct        | 0.009859891 | 1.09858224 | 0.152 | 0.073 |             | 1 CTRL | Qpct        | 0.079 |
| Plac8       | 1.82675E-09 | 1.09929611 | 0.826 | 0.596 | 5.67262E-05 | M28    | Plac8       | 0.23  |
| Ptprc       | 6.83078E-09 | 1.37283367 | 0.664 | 0.424 | 0.000212116 | M28    | Ptprc       | 0.24  |
| Emp3        | 1.14484E-06 | 1.07343959 | 0.659 | 0.475 | 0.035550608 | M28    | Emp3        | 0.184 |
| Cd53        | 1.21909E-06 | 1.1097788  | 0.563 | 0.333 | 0.037856534 | M28    | Cd53        | 0.23  |
| Cd7         | 2.71797E-06 | 1.88792235 | 0.336 | 0.101 | 0.084401103 | M28    | Cd7         | 0.235 |
| Mpeg1       | 2.82151E-06 | 1.57744265 | 0.533 | 0.343 | 0.087616303 | M28    | Mpeg1       | 0.19  |
| Tspan13     | 8.95721E-06 | 1.01925107 | 0.554 | 0.323 | 0.278148316 | M28    | Tspan13     | 0.231 |
| Klrd1       | 1.11537E-05 | 1.17829941 | 0.504 | 0.263 | 0.346357196 | M28    | Klrd1       | 0.241 |
| Mat2a       | 1.44787E-05 | 1.1623752  | 0.361 | 0.131 | 0.449606012 | M28    | Mat2a       | 0.23  |
| Bst2        | 1.64188E-05 | 1.46451716 | 0.628 | 0.444 | 0.5098535   | M28    | Bst2        | 0.184 |

|          |             |            |       |       |             |       |          |       |
|----------|-------------|------------|-------|-------|-------------|-------|----------|-------|
| Tcf4     | 1.86874E-05 | 1.68712854 | 0.397 | 0.172 | 0.580300131 | M28   | Tcf4     | 0.225 |
| Cnot6l   | 4.01321E-05 | 2.29582623 | 0.245 | 0.061 |             | 1 M28 | Cnot6l   | 0.184 |
| Tmed5    | 4.96666E-05 | 1.3306073  | 0.412 | 0.222 |             | 1 M28 | Tmed5    | 0.19  |
| Sirpa    | 7.67281E-05 | 1.94041146 | 0.294 | 0.111 |             | 1 M28 | Sirpa    | 0.183 |
| Tet3     | 9.41071E-05 | 5.62202484 | 0.137 | 0     |             | 1 M28 | Tet3     | 0.137 |
| Ramp1    | 0.000118267 | 1.88229876 | 0.321 | 0.152 |             | 1 M28 | Ramp1    | 0.169 |
| Lyz2     | 0.000122981 | 1.9399884  | 0.462 | 0.273 |             | 1 M28 | Lyz2     | 0.189 |
| Mrpl52   | 0.000166215 | 0.73397233 | 0.644 | 0.444 |             | 1 M28 | Mrpl52   | 0.2   |
| Hexim1   | 0.000168753 | 2.19219932 | 0.245 | 0.081 |             | 1 M28 | Hexim1   | 0.164 |
| Slc44a2  | 0.000173117 | 1.73880711 | 0.239 | 0.071 |             | 1 M28 | Slc44a2  | 0.168 |
| mt-Nd3   | 0.000181214 | 0.80979781 | 0.484 | 0.293 |             | 1 M28 | mt-Nd3   | 0.191 |
| Fus      | 0.000227499 | 0.80848877 | 0.481 | 0.293 |             | 1 M28 | Fus      | 0.188 |
| Cybb     | 0.000351511 | 1.07669208 | 0.452 | 0.273 |             | 1 M28 | Cybb     | 0.179 |
| Ubl3     | 0.00036315  | 0.82848165 | 0.446 | 0.283 |             | 1 M28 | Ubl3     | 0.163 |
| Plaur    | 0.000388679 | 0.84313589 | 0.374 | 0.192 |             | 1 M28 | Plaur    | 0.182 |
| Trps1    | 0.000448423 | 1.28732576 | 0.25  | 0.091 |             | 1 M28 | Trps1    | 0.159 |
| BC005537 | 0.000557643 | 0.99426078 | 0.416 | 0.263 |             | 1 M28 | BC005537 | 0.153 |
| Kdm6b    | 0.000679082 | 0.73246008 | 0.548 | 0.394 |             | 1 M28 | Kdm6b    | 0.154 |
| Grn      | 0.000767799 | 0.72288996 | 0.588 | 0.414 |             | 1 M28 | Grn      | 0.174 |
| Ctsb     | 0.000809015 | 0.76820091 | 0.609 | 0.455 |             | 1 M28 | Ctsb     | 0.154 |
| Tgfb1    | 0.000889147 | 0.99286078 | 0.427 | 0.273 |             | 1 M28 | Tgfb1    | 0.154 |
| Ly6c2    | 0.00090007  | 1.40253881 | 0.219 | 0.071 |             | 1 M28 | Ly6c2    | 0.148 |
| Rab21    | 0.000921966 | 0.775398   | 0.427 | 0.263 |             | 1 M28 | Rab21    | 0.164 |
| H13      | 0.000979421 | 0.80108982 | 0.536 | 0.404 |             | 1 M28 | H13      | 0.132 |
| Ccr2     | 0.001044359 | 1.47710271 | 0.321 | 0.172 |             | 1 M28 | Ccr2     | 0.149 |
| Macf1    | 0.001079596 | 1.36236645 | 0.209 | 0.071 |             | 1 M28 | Macf1    | 0.138 |
| Ddx6     | 0.001154322 | 0.97437703 | 0.371 | 0.212 |             | 1 M28 | Ddx6     | 0.159 |
| P2ry10   | 0.001182659 | 0.89659532 | 0.419 | 0.242 |             | 1 M28 | P2ry10   | 0.177 |
| Dusp5    | 0.001371417 | 0.94113971 | 0.424 | 0.283 |             | 1 M28 | Dusp5    | 0.141 |
| Luc7l3   | 0.001430012 | 1.26920267 | 0.316 | 0.172 |             | 1 M28 | Luc7l3   | 0.144 |
| Sept1    | 0.001773415 | 2.19835606 | 0.157 | 0.04  |             | 1 M28 | Sept1    | 0.117 |
| Snx18    | 0.001800903 | 1.19202489 | 0.23  | 0.091 |             | 1 M28 | Snx18    | 0.139 |
| Atp2b4   | 0.001824397 | 2.3388651  | 0.129 | 0.02  |             | 1 M28 | Atp2b4   | 0.109 |
| Ddx46    | 0.002122265 | 1.93306061 | 0.182 | 0.061 |             | 1 M28 | Ddx46    | 0.121 |
| Tle3     | 0.002218329 | 1.69625474 | 0.257 | 0.121 |             | 1 M28 | Tle3     | 0.136 |
| Diaph2   | 0.002352767 | 2.83267403 | 0.107 | 0.01  |             | 1 M28 | Diaph2   | 0.097 |
| Phf2     | 0.002354008 | 4.98867025 | 0.087 | 0     |             | 1 M28 | Phf2     | 0.087 |
| Ywhaz    | 0.002676297 | 0.94148475 | 0.439 | 0.303 |             | 1 M28 | Ywhaz    | 0.136 |
| Mef2c    | 0.002744426 | 0.83825553 | 0.322 | 0.162 |             | 1 M28 | Mef2c    | 0.16  |
| Tecr     | 0.002819387 | 1.02857996 | 0.362 | 0.222 |             | 1 M28 | Tecr     | 0.14  |
| Zbtb20   | 0.002848039 | 1.67608321 | 0.165 | 0.051 |             | 1 M28 | Zbtb20   | 0.114 |
| Ms4a4c   | 0.002862952 | 0.79269205 | 0.337 | 0.182 |             | 1 M28 | Ms4a4c   | 0.155 |
| Cox6a2   | 0.003128038 | 2.54198382 | 0.184 | 0.071 |             | 1 M28 | Cox6a2   | 0.113 |
| Fem1c    | 0.003183215 | 1.25162717 | 0.202 | 0.081 |             | 1 M28 | Fem1c    | 0.121 |
| Nfkb1    | 0.003240225 | 0.73404683 | 0.576 | 0.424 |             | 1 M28 | Nfkb1    | 0.152 |
| Siglech  | 0.00324976  | 1.26699043 | 0.209 | 0.081 |             | 1 M28 | Siglech  | 0.128 |
| Sema4d   | 0.00325122  | 1.16594754 | 0.197 | 0.071 |             | 1 M28 | Sema4d   | 0.126 |
| Ugcg     | 0.003326623 | 2.3207323  | 0.119 | 0.02  |             | 1 M28 | Ugcg     | 0.099 |
| Selenop  | 0.003411942 | 2.5776975  | 0.117 | 0.02  |             | 1 M28 | Selenop  | 0.097 |
| Tmem59   | 0.003680853 | 1.00859138 | 0.417 | 0.293 |             | 1 M28 | Tmem59   | 0.124 |
| Itpr1    | 0.003722225 | 0.97824414 | 0.255 | 0.121 |             | 1 M28 | Itpr1    | 0.134 |

|          |             |            |       |       |       |          |       |
|----------|-------------|------------|-------|-------|-------|----------|-------|
| Lair1    | 0.003908103 | 1.19712143 | 0.217 | 0.091 | 1 M28 | Lair1    | 0.126 |
| Wfdc17   | 0.003942765 | 0.69501316 | 0.487 | 0.333 | 1 M28 | Wfdc17   | 0.154 |
| Saa3     | 0.00396491  | 5.23903545 | 0.078 | 0     | 1 M28 | Saa3     | 0.078 |
| Dgkd     | 0.004010198 | 2.66830802 | 0.114 | 0.02  | 1 M28 | Dgkd     | 0.094 |
| Diaph1   | 0.004050211 | 1.07351065 | 0.321 | 0.192 | 1 M28 | Diaph1   | 0.129 |
| Capns1   | 0.004438438 | 0.74097184 | 0.427 | 0.303 | 1 M28 | Capns1   | 0.124 |
| Atp1b1   | 0.004929565 | 1.86656333 | 0.157 | 0.051 | 1 M28 | Atp1b1   | 0.106 |
| Ccl9     | 0.005120583 | 1.82856308 | 0.182 | 0.071 | 1 M28 | Ccl9     | 0.111 |
| Vwa5a    | 0.005152532 | 2.93203318 | 0.093 | 0.01  | 1 M28 | Vwa5a    | 0.083 |
| Rock1    | 0.005246267 | 1.08716545 | 0.327 | 0.202 | 1 M28 | Rock1    | 0.125 |
| Dusp16   | 0.005300839 | 1.85107862 | 0.155 | 0.051 | 1 M28 | Dusp16   | 0.104 |
| Agps     | 0.005354806 | 2.63094075 | 0.093 | 0.01  | 1 M28 | Agps     | 0.083 |
| Wdr1     | 0.005459716 | 0.86536335 | 0.357 | 0.222 | 1 M28 | Wdr1     | 0.135 |
| Gch1     | 0.005501845 | 1.45430244 | 0.23  | 0.111 | 1 M28 | Gch1     | 0.119 |
| Syk      | 0.005751016 | 1.01076415 | 0.255 | 0.131 | 1 M28 | Syk      | 0.124 |
| Lgmn     | 0.005855241 | 0.83881023 | 0.359 | 0.222 | 1 M28 | Lgmn     | 0.137 |
| Rhoq     | 0.005912844 | 3.38027917 | 0.09  | 0.01  | 1 M28 | Rhoq     | 0.08  |
| Rest     | 0.006224869 | 2.6794411  | 0.145 | 0.051 | 1 M28 | Rest     | 0.094 |
| Celf2    | 0.006361155 | 1.12406864 | 0.319 | 0.202 | 1 M28 | Celf2    | 0.117 |
| Ranbp9   | 0.00636646  | 4.09495537 | 0.088 | 0.01  | 1 M28 | Ranbp9   | 0.078 |
| Kdm5a    | 0.006533858 | 1.27269451 | 0.187 | 0.081 | 1 M28 | Kdm5a    | 0.106 |
| Ncstn    | 0.006617405 | 3.31481373 | 0.088 | 0.01  | 1 M28 | Ncstn    | 0.078 |
| Stx7     | 0.006649608 | 1.0456729  | 0.367 | 0.263 | 1 M28 | Stx7     | 0.104 |
| Tfrc     | 0.006662987 | 3.42212216 | 0.104 | 0.02  | 1 M28 | Tfrc     | 0.084 |
| Osbpl8   | 0.006711299 | 1.89579138 | 0.15  | 0.051 | 1 M28 | Osbpl8   | 0.099 |
| Blnk     | 0.006773743 | 2.13632715 | 0.124 | 0.03  | 1 M28 | Blnk     | 0.094 |
| Nsd3     | 0.006990204 | 0.86753268 | 0.324 | 0.202 | 1 M28 | Nsd3     | 0.122 |
| Mrps15   | 0.007117899 | 1.18220552 | 0.249 | 0.131 | 1 M28 | Mrps15   | 0.118 |
| Tmem173  | 0.007194099 | 2.03448305 | 0.18  | 0.081 | 1 M28 | Tmem173  | 0.099 |
| Tifa     | 0.007267059 | 1.13561667 | 0.25  | 0.131 | 1 M28 | Tifa     | 0.119 |
| Kcnq1ot1 | 0.007397254 | 1.97116736 | 0.162 | 0.061 | 1 M28 | Kcnq1ot1 | 0.101 |
| Ctsa     | 0.007513732 | 0.70117822 | 0.377 | 0.232 | 1 M28 | Ctsa     | 0.145 |
| Ptafr    | 0.007527486 | 1.70215512 | 0.197 | 0.091 | 1 M28 | Ptafr    | 0.106 |
| Vav2     | 0.007632958 | 1.30526615 | 0.088 | 0.01  | 1 M28 | Vav2     | 0.078 |
| Cd37     | 0.007673253 | 1.16995693 | 0.192 | 0.081 | 1 M28 | Cd37     | 0.111 |
| Atf1     | 0.007720791 | 1.76844642 | 0.157 | 0.061 | 1 M28 | Atf1     | 0.096 |
| Creb1    | 0.007910158 | 0.87916083 | 0.17  | 0.061 | 1 M28 | Creb1    | 0.109 |
| Cd164    | 0.008016518 | 1.66986655 | 0.162 | 0.061 | 1 M28 | Cd164    | 0.101 |
| Icam1    | 0.008714076 | 1.15313164 | 0.352 | 0.242 | 1 M28 | Icam1    | 0.11  |
| Zmynd8   | 0.008755747 | 1.22672229 | 0.174 | 0.071 | 1 M28 | Zmynd8   | 0.103 |
| Rc3h2    | 0.00878856  | 2.85397583 | 0.085 | 0.01  | 1 M28 | Rc3h2    | 0.075 |
| Atf6b    | 0.008878091 | 1.80407373 | 0.117 | 0.03  | 1 M28 | Atf6b    | 0.087 |
| Ubr2     | 0.009147877 | 2.61874441 | 0.1   | 0.02  | 1 M28 | Ubr2     | 0.08  |
| Mark2    | 0.009214205 | 1.70636696 | 0.159 | 0.061 | 1 M28 | Mark2    | 0.098 |
| Fam168b  | 0.009223716 | 1.17411397 | 0.224 | 0.111 | 1 M28 | Fam168b  | 0.113 |
| Rock2    | 0.009346189 | 2.74656233 | 0.114 | 0.03  | 1 M28 | Rock2    | 0.084 |
| Irf2     | 0.009807716 | 2.29087047 | 0.14  | 0.051 | 1 M28 | Irf2     | 0.089 |
| Actr1b   | 0.009810716 | 2.6841465  | 0.098 | 0.02  | 1 M28 | Actr1b   | 0.078 |
| Prr5l    | 0.009904805 | 2.66953641 | 0.098 | 0.02  | 1 M28 | Prr5l    | 0.078 |
