# Supplementary material
Source: PubMed Central journal article supplement (PMC8940682)
Supplement: NIHMS1773905-supplement-17.pdf [file NIHMS1773905-supplement-17.pdf]

**Supplemental Table 5. Gene Expression Fold Change in Macrophages of control vs m28 treated tumors**

| gene_name    | p_val       | avg_log2FC | pct.1 | pct.2 | p_val_adj   | cluster | gene        | pct.diff |
|--------------|-------------|------------|-------|-------|-------------|---------|-------------|----------|
| Rgs1         | 1.5896E-141 | 1.98961093 | 0.732 | 0.495 | 4.9362E-137 | CTRL    | Rgs1        | 0.237    |
| Gapdh        | 9.2586E-120 | 0.72978339 | 0.992 | 0.962 | 2.8751E-115 | CTRL    | Gapdh       | 0.03     |
| Jun          | 1.22669E-77 | 1.62373251 | 0.635 | 0.395 | 3.80925E-73 | CTRL    | Jun         | 0.24     |
| Tpi1         | 1.22629E-72 | 0.91304704 | 0.844 | 0.676 | 3.808E-68   | CTRL    | Tpi1        | 0.168    |
| Ldha         | 1.55978E-72 | 0.7746118  | 0.899 | 0.81  | 4.84358E-68 | CTRL    | Ldha        | 0.089    |
| Atf3         | 7.92274E-63 | 1.36631584 | 0.657 | 0.453 | 2.46025E-58 | CTRL    | Atf3        | 0.204    |
| Fkbp5        | 2.82747E-51 | 1.76806906 | 0.236 | 0.083 | 8.78015E-47 | CTRL    | Fkbp5       | 0.153    |
| Gadd45g      | 1.11563E-46 | 1.80295248 | 0.292 | 0.126 | 3.46435E-42 | CTRL    | Gadd45g     | 0.166    |
| Plin2        | 3.11573E-35 | 0.69378993 | 0.819 | 0.755 | 9.67528E-31 | CTRL    | Plin2       | 0.064    |
| Eno1         | 9.19497E-34 | 0.70706002 | 0.751 | 0.639 | 2.85532E-29 | CTRL    | Eno1        | 0.112    |
| AY036118     | 1.09915E-32 | 0.75024174 | 0.868 | 0.762 | 3.41319E-28 | CTRL    | AY036118    | 0.106    |
| Ccl4         | 1.61701E-32 | 1.17838728 | 0.657 | 0.555 | 5.02131E-28 | CTRL    | Ccl4        | 0.102    |
| Snhg12       | 2.59647E-32 | 1.24916095 | 0.266 | 0.128 | 8.06281E-28 | CTRL    | Snhg12      | 0.138    |
| Egr1         | 5.41132E-25 | 1.11635272 | 0.342 | 0.214 | 1.68038E-20 | CTRL    | Egr1        | 0.128    |
| Gdf15        | 1.77504E-23 | 1.36222113 | 0.352 | 0.233 | 5.51203E-19 | CTRL    | Gdf15       | 0.119    |
| Pfkl         | 3.37106E-22 | 0.97338821 | 0.297 | 0.173 | 1.04681E-17 | CTRL    | Pfkl        | 0.124    |
| Klf9         | 1.60014E-21 | 1.20978442 | 0.125 | 0.048 | 4.96893E-17 | CTRL    | Klf9        | 0.077    |
| Eif4ebp1     | 3.6747E-21  | 0.7232471  | 0.564 | 0.442 | 1.14111E-16 | CTRL    | Eif4ebp1    | 0.122    |
| mt-Atp8      | 3.8451E-21  | 0.7966628  | 0.735 | 0.654 | 1.19402E-16 | CTRL    | mt-Atp8     | 0.081    |
| Txnip        | 2.17335E-19 | 1.05465159 | 0.182 | 0.09  | 6.7489E-15  | CTRL    | Txnip       | 0.092    |
| Cited1       | 5.94264E-19 | 1.68011709 | 0.07  | 0.02  | 1.84537E-14 | CTRL    | Cited1      | 0.05     |
| Mt2          | 1.02067E-18 | 0.80980204 | 0.33  | 0.213 | 3.1695E-14  | CTRL    | Mt2         | 0.117    |
| Rasgef1b     | 1.47913E-18 | 0.81094522 | 0.33  | 0.213 | 4.59315E-14 | CTRL    | Rasgef1b    | 0.117    |
| Tomm40       | 2.14694E-18 | 0.81304376 | 0.325 | 0.212 | 6.66688E-14 | CTRL    | Tomm40      | 0.113    |
| Fam162a      | 2.56973E-18 | 0.78678443 | 0.434 | 0.319 | 7.97978E-14 | CTRL    | Fam162a     | 0.115    |
| Plk2         | 3.59155E-18 | 1.05107236 | 0.306 | 0.199 | 1.11528E-13 | CTRL    | Plk2        | 0.107    |
| Cited2       | 9.17601E-18 | 1.00324669 | 0.442 | 0.333 | 2.84943E-13 | CTRL    | Cited2      | 0.109    |
| Tnf          | 1.82898E-17 | 0.8821034  | 0.513 | 0.418 | 5.67953E-13 | CTRL    | Tnf         | 0.095    |
| Ankrd37      | 1.48257E-16 | 1.1461744  | 0.16  | 0.082 | 4.60383E-12 | CTRL    | Ankrd37     | 0.078    |
| Rhov         | 1.48161E-15 | 1.7623066  | 0.096 | 0.04  | 4.60085E-11 | CTRL    | Rhov        | 0.056    |
| Ccl3         | 1.5738E-15  | 0.88694942 | 0.521 | 0.436 | 4.88713E-11 | CTRL    | Ccl3        | 0.085    |
| Vcam1        | 1.98339E-15 | 0.94693725 | 0.327 | 0.229 | 6.15904E-11 | CTRL    | Vcam1       | 0.098    |
| Sap30        | 2.33838E-15 | 0.78764212 | 0.309 | 0.202 | 7.26138E-11 | CTRL    | Sap30       | 0.107    |
| Hcar2        | 3.38998E-15 | 1.18063317 | 0.155 | 0.081 | 1.05269E-10 | CTRL    | Hcar2       | 0.074    |
| Rnf126       | 4.78722E-15 | 0.86569169 | 0.214 | 0.125 | 1.48658E-10 | CTRL    | Rnf126      | 0.089    |
| Pa2g4        | 5.14604E-15 | 0.72522464 | 0.381 | 0.283 | 1.598E-10   | CTRL    | Pa2g4       | 0.098    |
| Hist1h1e     | 5.35262E-15 | 1.51838133 | 0.086 | 0.034 | 1.66215E-10 | CTRL    | Hist1h1e    | 0.052    |
| Hspa1a       | 7.4432E-15  | 1.63281925 | 0.258 | 0.168 | 2.31134E-10 | CTRL    | Hspa1a      | 0.09     |
| Map3k8       | 4.82077E-14 | 1.15909583 | 0.203 | 0.119 | 1.49699E-09 | CTRL    | Map3k8      | 0.084    |
| 1810032O08F  | 1.51538E-13 | 1.21315325 | 0.071 | 0.026 | 4.70571E-09 | CTRL    | 1810032O08  | 0.045    |
| Tubb4b       | 1.84028E-13 | 0.82777635 | 0.361 | 0.27  | 5.71462E-09 | CTRL    | Tubb4b      | 0.091    |
| Lipg         | 3.05108E-13 | 2.68003494 | 0.021 | 0.002 | 9.47452E-09 | CTRL    | Lipg        | 0.019    |
| Ddit3        | 5.05161E-13 | 0.87567171 | 0.284 | 0.191 | 1.56868E-08 | CTRL    | Ddit3       | 0.093    |
| Ccl12        | 7.02375E-13 | 0.97437587 | 0.372 | 0.282 | 2.18109E-08 | CTRL    | Ccl12       | 0.09     |
| Bnip3        | 1.01892E-12 | 0.75319552 | 0.325 | 0.228 | 3.16405E-08 | CTRL    | Bnip3       | 0.097    |
| Slc2a1       | 1.24073E-12 | 0.77970501 | 0.351 | 0.259 | 3.85283E-08 | CTRL    | Slc2a1      | 0.092    |
| Mmp12        | 2.16838E-12 | 0.81074937 | 0.197 | 0.121 | 6.73348E-08 | CTRL    | Mmp12       | 0.076    |
| Furin        | 5.12489E-12 | 0.74041169 | 0.458 | 0.373 | 1.59143E-07 | CTRL    | Furin       | 0.085    |
| Ero1l        | 8.23841E-12 | 0.73262773 | 0.339 | 0.246 | 2.55827E-07 | CTRL    | Ero1l       | 0.093    |
| Pgp          | 1.29504E-11 | 0.71467136 | 0.269 | 0.183 | 4.02149E-07 | CTRL    | Pgp         | 0.086    |
| Srm          | 3.54022E-11 | 0.6958401  | 0.166 | 0.098 | 1.09934E-06 | CTRL    | Srm         | 0.068    |
| GnI3         | 4.04643E-11 | 0.87468541 | 0.186 | 0.114 | 1.25654E-06 | CTRL    | GnI3        | 0.072    |
| 2010111I01Ri | 7.85604E-11 | 0.69764035 | 0.307 | 0.222 | 2.43954E-06 | CTRL    | 2010111I01F | 0.085    |
| Sectm1a      | 1.09182E-10 | 1.24787508 | 0.048 | 0.017 | 3.39042E-06 | CTRL    | Sectm1a     | 0.031    |
| Tyms         | 1.10622E-10 | 0.94032993 | 0.152 | 0.09  | 3.43516E-06 | CTRL    | Tyms        | 0.062    |

|           |             |            |       |       |             |      |           |       |
|-----------|-------------|------------|-------|-------|-------------|------|-----------|-------|
| Tubg1     | 1.1854E-10  | 0.94387486 | 0.122 | 0.066 | 3.68101E-06 | CTRL | Tubg1     | 0.056 |
| Ppan      | 2.24023E-10 | 1.01061905 | 0.082 | 0.038 | 6.95659E-06 | CTRL | Ppan      | 0.044 |
| Wee1      | 2.32338E-10 | 1.28152018 | 0.073 | 0.032 | 7.21478E-06 | CTRL | Wee1      | 0.041 |
| Mrap      | 2.34068E-10 | 1.97978516 | 0.018 | 0.002 | 7.26853E-06 | CTRL | Mrap      | 0.016 |
| Nsfl1c    | 2.56041E-10 | 0.80197463 | 0.232 | 0.155 | 7.95084E-06 | CTRL | Nsfl1c    | 0.077 |
| Nifk      | 2.87154E-10 | 0.80785734 | 0.149 | 0.088 | 8.91699E-06 | CTRL | Nifk      | 0.061 |
| Pold2     | 4.28573E-10 | 0.81368533 | 0.091 | 0.044 | 1.33085E-05 | CTRL | Pold2     | 0.047 |
| Mcm5      | 4.92142E-10 | 0.74536906 | 0.153 | 0.091 | 1.52825E-05 | CTRL | Mcm5      | 0.062 |
| Pparg     | 5.46808E-10 | 0.78525912 | 0.111 | 0.059 | 1.698E-05   | CTRL | Pparg     | 0.052 |
| Lsg1      | 1.36732E-09 | 1.03180226 | 0.108 | 0.058 | 4.24595E-05 | CTRL | Lsg1      | 0.05  |
| Rrp15     | 1.48398E-09 | 0.77343547 | 0.136 | 0.078 | 4.60819E-05 | CTRL | Rrp15     | 0.058 |
| Hist1h1b  | 1.50603E-09 | 1.36554356 | 0.064 | 0.028 | 4.67669E-05 | CTRL | Hist1h1b  | 0.036 |
| Adrb1     | 1.55963E-09 | 1.57856363 | 0.013 | 0.001 | 4.84313E-05 | CTRL | Adrb1     | 0.012 |
| Htra4     | 1.80173E-09 | 1.50061635 | 0.033 | 0.01  | 5.59491E-05 | CTRL | Htra4     | 0.023 |
| Prim2     | 2.10667E-09 | 1.05526861 | 0.084 | 0.041 | 6.54185E-05 | CTRL | Prim2     | 0.043 |
| Slamf9    | 2.20165E-09 | 0.80695228 | 0.275 | 0.201 | 6.83677E-05 | CTRL | Slamf9    | 0.074 |
| Gemin2    | 2.33826E-09 | 1.00074572 | 0.071 | 0.032 | 7.26099E-05 | CTRL | Gemin2    | 0.039 |
| Nop58     | 2.69339E-09 | 0.73017408 | 0.22  | 0.148 | 8.36378E-05 | CTRL | Nop58     | 0.072 |
| Ado       | 2.71479E-09 | 0.80928399 | 0.151 | 0.091 | 8.43024E-05 | CTRL | Ado       | 0.06  |
| Nop56     | 2.7337E-09  | 0.71184816 | 0.246 | 0.171 | 8.48894E-05 | CTRL | Nop56     | 0.075 |
| Car6      | 2.74686E-09 | 0.95320981 | 0.1   | 0.053 | 8.52983E-05 | CTRL | Car6      | 0.047 |
| Ifnb1     | 2.87976E-09 | 2.02116676 | 0.035 | 0.011 | 8.9425E-05  | CTRL | Ifnb1     | 0.024 |
| Matn2     | 6.03286E-09 | 1.16383305 | 0.016 | 0.002 | 0.000187338 | CTRL | Matn2     | 0.014 |
| Rsad2     | 8.28726E-09 | 1.01957431 | 0.241 | 0.173 | 0.000257344 | CTRL | Rsad2     | 0.068 |
| Rfc5      | 8.84955E-09 | 0.846963   | 0.129 | 0.076 | 0.000274805 | CTRL | Rfc5      | 0.053 |
| Dut       | 9.14507E-09 | 0.80848649 | 0.209 | 0.144 | 0.000283982 | CTRL | Dut       | 0.065 |
| Nxt1      | 9.19218E-09 | 0.75917415 | 0.151 | 0.093 | 0.000285445 | CTRL | Nxt1      | 0.058 |
| Hist1h2ap | 1.06222E-08 | 1.10638565 | 0.109 | 0.062 | 0.00032985  | CTRL | Hist1h2ap | 0.047 |
| Gm42031   | 1.10403E-08 | 1.2042505  | 0.017 | 0.003 | 0.000342836 | CTRL | Gm42031   | 0.014 |
| Apol11b   | 1.428E-08   | 2.63870593 | 0.019 | 0.004 | 0.000443438 | CTRL | Apol11b   | 0.015 |
| Hist1h2ae | 1.46197E-08 | 1.21262273 | 0.094 | 0.051 | 0.000453986 | CTRL | Hist1h2ae | 0.043 |
| Rhoc      | 1.89819E-08 | 0.76749284 | 0.214 | 0.15  | 0.000589446 | CTRL | Rhoc      | 0.064 |
| Chchd6    | 2.15226E-08 | 0.9434283  | 0.14  | 0.086 | 0.000668342 | CTRL | Chchd6    | 0.054 |
| Mthfd2    | 2.5302E-08  | 0.79244905 | 0.166 | 0.107 | 0.000785703 | CTRL | Mthfd2    | 0.059 |
| Chaf1b    | 3.19163E-08 | 0.70610544 | 0.107 | 0.061 | 0.000991097 | CTRL | Chaf1b    | 0.046 |
| Ifit1     | 3.88965E-08 | 1.40388446 | 0.108 | 0.063 | 0.001207852 | CTRL | Ifit1     | 0.045 |
| Pvt1      | 4.15748E-08 | 1.11187229 | 0.048 | 0.02  | 0.001291021 | CTRL | Pvt1      | 0.028 |
| Cd79b     | 5.30677E-08 | 0.75059915 | 0.087 | 0.046 | 0.001647913 | CTRL | Cd79b     | 0.041 |
| Fam213a   | 5.49899E-08 | 1.20710594 | 0.066 | 0.032 | 0.001707603 | CTRL | Fam213a   | 0.034 |
| St7       | 5.68987E-08 | 0.73878644 | 0.106 | 0.061 | 0.001766875 | CTRL | St7       | 0.045 |
| Chchd10   | 6.41637E-08 | 0.7028823  | 0.284 | 0.216 | 0.001992477 | CTRL | Chchd10   | 0.068 |
| Cdca8     | 8.0925E-08  | 0.82061375 | 0.146 | 0.095 | 0.002512964 | CTRL | Cdca8     | 0.051 |
| Jaml      | 8.24105E-08 | 1.31590179 | 0.062 | 0.029 | 0.002559093 | CTRL | Jaml      | 0.033 |
| Arrdc3    | 8.79231E-08 | 0.83984686 | 0.129 | 0.079 | 0.002730277 | CTRL | Arrdc3    | 0.05  |
| Hist1h4i  | 1.06034E-07 | 0.78157831 | 0.126 | 0.077 | 0.003292665 | CTRL | Hist1h4i  | 0.049 |
| Plau      | 1.17454E-07 | 0.76234769 | 0.141 | 0.089 | 0.003647285 | CTRL | Plau      | 0.052 |
| Wdr46     | 1.52367E-07 | 0.7513526  | 0.089 | 0.049 | 0.004731439 | CTRL | Wdr46     | 0.04  |
| Rcc1l     | 1.56065E-07 | 1.17393045 | 0.058 | 0.027 | 0.004846299 | CTRL | Rcc1l     | 0.031 |
| Tbcc      | 2.24605E-07 | 1.00397278 | 0.1   | 0.058 | 0.006974652 | CTRL | Tbcc      | 0.042 |
| Spc24     | 3.9839E-07  | 0.73803438 | 0.145 | 0.095 | 0.012371205 | CTRL | Spc24     | 0.05  |
| Ntmt1     | 4.36422E-07 | 0.84650101 | 0.104 | 0.062 | 0.013552211 | CTRL | Ntmt1     | 0.042 |
| Hist1h1d  | 7.37385E-07 | 1.46525078 | 0.026 | 0.008 | 0.022898022 | CTRL | Hist1h1d  | 0.018 |
| Gins2     | 7.54501E-07 | 0.87639317 | 0.111 | 0.068 | 0.023429517 | CTRL | Gins2     | 0.043 |
| Ciart     | 7.7312E-07  | 1.36701511 | 0.021 | 0.006 | 0.024007701 | CTRL | Ciart     | 0.015 |
| Rhoh      | 8.12276E-07 | 0.7908419  | 0.125 | 0.079 | 0.025223614 | CTRL | Rhoh      | 0.046 |
| Fam136a   | 8.27491E-07 | 0.79088589 | 0.104 | 0.063 | 0.025696079 | CTRL | Fam136a   | 0.041 |
| Hddc2     | 8.33864E-07 | 1.0000701  | 0.13  | 0.084 | 0.025893994 | CTRL | Hddc2     | 0.046 |
| Nme6      | 8.78417E-07 | 0.84296866 | 0.068 | 0.035 | 0.027277498 | CTRL | Nme6      | 0.033 |

|             |             |            |       |       |             |      |            |       |
|-------------|-------------|------------|-------|-------|-------------|------|------------|-------|
| Rnd3        | 9.53334E-07 | 0.97803022 | 0.083 | 0.047 | 0.029603887 | CTRL | Rnd3       | 0.036 |
| Wdr4        | 1.04714E-06 | 1.02962272 | 0.058 | 0.029 | 0.032516804 | CTRL | Wdr4       | 0.029 |
| Ccnb2       | 1.23452E-06 | 0.76692125 | 0.136 | 0.089 | 0.038335598 | CTRL | Ccnb2      | 0.047 |
| Hist1h1c    | 1.30841E-06 | 0.77603313 | 0.182 | 0.13  | 0.040630105 | CTRL | Hist1h1c   | 0.052 |
| Bhlhe41     | 1.50488E-06 | 1.1657052  | 0.108 | 0.068 | 0.046730997 | CTRL | Bhlhe41    | 0.04  |
| Olf889      | 1.56898E-06 | 1.37641015 | 0.012 | 0.002 | 0.048721468 | CTRL | Olf889     | 0.01  |
| Hspa1b      | 1.64786E-06 | 1.21931428 | 0.138 | 0.093 | 0.051170873 | CTRL | Hspa1b     | 0.045 |
| Rab19       | 1.66278E-06 | 1.26095004 | 0.028 | 0.01  | 0.051634331 | CTRL | Rab19      | 0.018 |
| Asns        | 1.8818E-06  | 1.13080258 | 0.059 | 0.03  | 0.058435642 | CTRL | Asns       | 0.029 |
| Zkscan14    | 3.42394E-06 | 1.04947976 | 0.043 | 0.02  | 0.106323661 | CTRL | Zkscan14   | 0.023 |
| Id1         | 3.61099E-06 | 1.49178258 | 0.046 | 0.022 | 0.112132039 | CTRL | Id1        | 0.024 |
| Aimp2       | 3.84564E-06 | 0.70733133 | 0.115 | 0.073 | 0.119418506 | CTRL | Aimp2      | 0.042 |
| Riox1       | 4.43504E-06 | 0.79258982 | 0.046 | 0.022 | 0.137721183 | CTRL | Riox1      | 0.024 |
| Rad51       | 4.57028E-06 | 1.0764092  | 0.058 | 0.031 | 0.141920988 | CTRL | Rad51      | 0.027 |
| Gmds        | 5.22167E-06 | 0.82380243 | 0.09  | 0.054 | 0.162148455 | CTRL | Gmds       | 0.036 |
| Igf2bp2     | 5.24186E-06 | 0.74389499 | 0.046 | 0.022 | 0.162775364 | CTRL | Igf2bp2    | 0.024 |
| Cluh        | 5.81886E-06 | 0.70538021 | 0.1   | 0.062 | 0.18069321  | CTRL | Cluh       | 0.038 |
| Lig1        | 6.67927E-06 | 0.72221265 | 0.156 | 0.109 | 0.207411396 | CTRL | Lig1       | 0.047 |
| Gm26609     | 7.05894E-06 | 1.03794859 | 0.022 | 0.007 | 0.219201384 | CTRL | Gm26609    | 0.015 |
| Rnf8        | 7.13096E-06 | 0.79886194 | 0.055 | 0.028 | 0.221437775 | CTRL | Rnf8       | 0.027 |
| Grhpr       | 7.84808E-06 | 0.8088193  | 0.127 | 0.085 | 0.243706417 | CTRL | Grhpr      | 0.042 |
| Ddit4       | 7.90593E-06 | 1.13300152 | 0.093 | 0.058 | 0.245502878 | CTRL | Ddit4      | 0.035 |
| Uhrf1       | 8.56851E-06 | 0.86617668 | 0.092 | 0.057 | 0.266077878 | CTRL | Uhrf1      | 0.035 |
| Selenbp1    | 8.73744E-06 | 0.80959646 | 0.108 | 0.069 | 0.271323721 | CTRL | Selenbp1   | 0.039 |
| Trmt61a     | 1.11394E-05 | 0.75511179 | 0.041 | 0.019 | 0.345913032 | CTRL | Trmt61a    | 0.022 |
| Mgarp       | 1.14205E-05 | 0.95383578 | 0.058 | 0.031 | 0.354639453 | CTRL | Mgarp      | 0.027 |
| Smyd2       | 1.31018E-05 | 0.83848097 | 0.1   | 0.064 | 0.406849502 | CTRL | Smyd2      | 0.036 |
| Espn        | 1.35701E-05 | 1.32735254 | 0.04  | 0.019 | 0.421393507 | CTRL | Espn       | 0.021 |
| Spc25       | 1.3905E-05  | 0.85276874 | 0.083 | 0.05  | 0.431792554 | CTRL | Spc25      | 0.033 |
| Fkbp6       | 1.45215E-05 | 0.89127086 | 0.053 | 0.028 | 0.450936619 | CTRL | Fkbp6      | 0.025 |
| Hyal1       | 1.4537E-05  | 0.78574682 | 0.069 | 0.04  | 0.451417901 | CTRL | Hyal1      | 0.029 |
| Trp53rka    | 1.55826E-05 | 0.84992699 | 0.041 | 0.02  | 0.48388717  | CTRL | Trp53rka   | 0.021 |
| Timm9       | 1.68077E-05 | 0.78451651 | 0.102 | 0.065 | 0.521928305 | CTRL | Timm9      | 0.037 |
| Bnc2        | 2.4215E-05  | 1.68061392 | 0.012 | 0.003 | 0.751949563 | CTRL | Bnc2       | 0.009 |
| Tpx2        | 2.71415E-05 | 0.75472335 | 0.112 | 0.075 | 0.842825059 | CTRL | Tpx2       | 0.037 |
| Tnfrsf23    | 2.7375E-05  | 1.53556083 | 0.04  | 0.019 | 0.850077352 | CTRL | Tnfrsf23   | 0.021 |
| Fcrl5       | 3.06553E-05 | 1.09537426 | 0.013 | 0.003 | 0.951937863 | CTRL | Fcrl5      | 0.01  |
| Utp6        | 3.09098E-05 | 0.79460274 | 0.102 | 0.066 | 0.95984201  | CTRL | Utp6       | 0.036 |
| Pcbp4       | 3.15423E-05 | 1.11117907 | 0.059 | 0.033 | 0.979483745 | CTRL | Pcbp4      | 0.026 |
| Map7d3      | 3.24966E-05 | 0.71517167 | 0.01  | 0.002 | 1           | CTRL | Map7d3     | 0.008 |
| Cox4i2      | 3.34055E-05 | 1.09326764 | 0.055 | 0.03  | 1           | CTRL | Cox4i2     | 0.025 |
| H1f0        | 3.52819E-05 | 0.81506635 | 0.207 | 0.161 | 1           | CTRL | H1f0       | 0.046 |
| Noc4l       | 4.13103E-05 | 0.77553734 | 0.104 | 0.069 | 1           | CTRL | Noc4l      | 0.035 |
| Trmt5       | 4.36861E-05 | 0.87066575 | 0.024 | 0.01  | 1           | CTRL | Trmt5      | 0.014 |
| Hjurp       | 4.53498E-05 | 0.70337358 | 0.091 | 0.058 | 1           | CTRL | Hjurp      | 0.033 |
| St3gal5     | 4.63052E-05 | 0.82680546 | 0.107 | 0.072 | 1           | CTRL | St3gal5    | 0.035 |
| Atad2       | 4.63536E-05 | 0.71193161 | 0.134 | 0.094 | 1           | CTRL | Atad2      | 0.04  |
| Pfkfb3      | 4.86412E-05 | 0.70643536 | 0.185 | 0.14  | 1           | CTRL | Pfkfb3     | 0.045 |
| 2900060B14R | 4.91335E-05 | 1.14569268 | 0.035 | 0.016 | 1           | CTRL | 2900060B14 | 0.019 |
| Nat10       | 5.31399E-05 | 1.11425596 | 0.046 | 0.024 | 1           | CTRL | Nat10      | 0.022 |
| Zfp777      | 6.28221E-05 | 1.30967598 | 0.04  | 0.02  | 1           | CTRL | Zfp777     | 0.02  |
| Il1r2       | 6.51967E-05 | 0.88205049 | 0.08  | 0.051 | 1           | CTRL | Il1r2      | 0.029 |
| Cdc45       | 6.70173E-05 | 0.82969862 | 0.053 | 0.029 | 1           | CTRL | Cdc45      | 0.024 |
| Zmynd19     | 7.11952E-05 | 0.86699204 | 0.047 | 0.025 | 1           | CTRL | Zmynd19    | 0.022 |
| Rpusd4      | 7.25315E-05 | 1.17553696 | 0.056 | 0.032 | 1           | CTRL | Rpusd4     | 0.024 |
| Thop1       | 7.40436E-05 | 0.71089553 | 0.076 | 0.047 | 1           | CTRL | Thop1      | 0.029 |
| Hist1h2bj   | 7.78264E-05 | 1.09517688 | 0.029 | 0.013 | 1           | CTRL | Hist1h2bj  | 0.016 |
| Cenpq       | 7.90445E-05 | 0.78246994 | 0.061 | 0.035 | 1           | CTRL | Cenpq      | 0.026 |

|              |             |            |       |       |        |             |       |
|--------------|-------------|------------|-------|-------|--------|-------------|-------|
| 1700019L13Ri | 8.14504E-05 | 0.90415484 | 0.041 | 0.021 | 1 CTRL | 1700019L13I | 0.02  |
| Mmachc       | 9.89566E-05 | 1.20297813 | 0.018 | 0.006 | 1 CTRL | Mmachc      | 0.012 |
| Aen          | 0.000130075 | 0.81145824 | 0.08  | 0.052 | 1 CTRL | Aen         | 0.028 |
| Slco2b1      | 0.00013831  | 0.78098441 | 0.026 | 0.011 | 1 CTRL | Slco2b1     | 0.015 |
| Ska1         | 0.000141609 | 0.714267   | 0.051 | 0.029 | 1 CTRL | Ska1        | 0.022 |
| Laptm4b      | 0.000144899 | 0.97005979 | 0.046 | 0.025 | 1 CTRL | Laptm4b     | 0.021 |
| Cdc42ep5     | 0.000144965 | 1.23018704 | 0.021 | 0.008 | 1 CTRL | Cdc42ep5    | 0.013 |
| Asb6         | 0.000153811 | 0.87988428 | 0.045 | 0.024 | 1 CTRL | Asb6        | 0.021 |
| Gm807        | 0.000168392 | 0.96446908 | 0.01  | 0.002 | 1 CTRL | Gm807       | 0.008 |
| 2700062C07R  | 0.000181207 | 0.81813076 | 0.061 | 0.036 | 1 CTRL | 2700062C07  | 0.025 |
| Sgo1         | 0.00018841  | 0.98551683 | 0.038 | 0.02  | 1 CTRL | Sgo1        | 0.018 |
| Aunip        | 0.000202949 | 1.13572718 | 0.022 | 0.009 | 1 CTRL | Aunip       | 0.013 |
| Trmt10c      | 0.000205943 | 0.73520245 | 0.054 | 0.031 | 1 CTRL | Trmt10c     | 0.023 |
| Zbtb16       | 0.000207128 | 1.42205003 | 0.012 | 0.003 | 1 CTRL | Zbtb16      | 0.009 |
| Taf1a        | 0.000211268 | 1.0204205  | 0.014 | 0.005 | 1 CTRL | Taf1a       | 0.009 |
| Ptcra        | 0.000214026 | 1.0451258  | 0.014 | 0.004 | 1 CTRL | Ptcra       | 0.01  |
| Repin1       | 0.000218464 | 1.09029282 | 0.019 | 0.007 | 1 CTRL | Repin1      | 0.012 |
| Fbxo5        | 0.000232859 | 0.86374666 | 0.041 | 0.022 | 1 CTRL | Fbxo5       | 0.019 |
| Dnaic1       | 0.000236458 | 2.12391046 | 0.02  | 0.008 | 1 CTRL | Dnaic1      | 0.012 |
| Haus5        | 0.000248162 | 0.77627607 | 0.041 | 0.022 | 1 CTRL | Haus5       | 0.019 |
| Atp6v0d2     | 0.000254103 | 0.81911572 | 0.097 | 0.067 | 1 CTRL | Atp6v0d2    | 0.03  |
| Ccnf         | 0.000269197 | 1.36610632 | 0.035 | 0.018 | 1 CTRL | Ccnf        | 0.017 |
| Ceacam16     | 0.000323598 | 1.46771981 | 0.015 | 0.005 | 1 CTRL | Ceacam16    | 0.01  |
| Cst6         | 0.000324058 | 0.72073014 | 0.062 | 0.038 | 1 CTRL | Cst6        | 0.024 |
| Kntc1        | 0.000340388 | 0.91851448 | 0.029 | 0.014 | 1 CTRL | Kntc1       | 0.015 |
| Hist1h3a     | 0.000348768 | 0.90051514 | 0.014 | 0.005 | 1 CTRL | Hist1h3a    | 0.009 |
| Rab17        | 0.000354778 | 1.33741496 | 0.014 | 0.004 | 1 CTRL | Rab17       | 0.01  |
| Platr25      | 0.000370578 | 0.93182215 | 0.011 | 0.003 | 1 CTRL | Platr25     | 0.008 |
| Dhfr         | 0.000379496 | 0.78577853 | 0.089 | 0.061 | 1 CTRL | Dhfr        | 0.028 |
| Zbed3        | 0.000392976 | 0.94092937 | 0.032 | 0.016 | 1 CTRL | Zbed3       | 0.016 |
| Ndufaf4      | 0.000393113 | 0.79403742 | 0.083 | 0.055 | 1 CTRL | Ndufaf4     | 0.028 |
| Shq1         | 0.000427467 | 0.76334102 | 0.033 | 0.017 | 1 CTRL | Shq1        | 0.016 |
| Rpp40        | 0.000432462 | 0.73220161 | 0.046 | 0.026 | 1 CTRL | Rpp40       | 0.02  |
| Shcbp1       | 0.000445571 | 1.05369403 | 0.053 | 0.032 | 1 CTRL | Shcbp1      | 0.021 |
| Pigl         | 0.000502284 | 1.55834895 | 0.015 | 0.005 | 1 CTRL | Pigl        | 0.01  |
| L3mbtl2      | 0.000527484 | 0.81522384 | 0.041 | 0.023 | 1 CTRL | L3mbtl2     | 0.018 |
| Xab2         | 0.00053602  | 0.73520295 | 0.088 | 0.06  | 1 CTRL | Xab2        | 0.028 |
| Mrps22       | 0.000561709 | 0.72084159 | 0.084 | 0.057 | 1 CTRL | Mrps22      | 0.027 |
| Zfp553       | 0.000588556 | 1.5489543  | 0.017 | 0.007 | 1 CTRL | Zfp553      | 0.01  |
| Fbxw17       | 0.000591921 | 0.73857351 | 0.063 | 0.04  | 1 CTRL | Fbxw17      | 0.023 |
| Mphosph9     | 0.00059519  | 0.99506561 | 0.023 | 0.01  | 1 CTRL | Mphosph9    | 0.013 |
| 5730480H06R  | 0.000607366 | 0.83039662 | 0.047 | 0.028 | 1 CTRL | 5730480H06  | 0.019 |
| Ankrd16      | 0.000642377 | 0.87998782 | 0.052 | 0.032 | 1 CTRL | Ankrd16     | 0.02  |
| Olf432       | 0.000643796 | 1.20035064 | 0.01  | 0.003 | 1 CTRL | Olf432      | 0.007 |
| Serpini1     | 0.000647459 | 1.41756844 | 0.01  | 0.003 | 1 CTRL | Serpini1    | 0.007 |
| Zfp846       | 0.000653196 | 1.05930234 | 0.01  | 0.003 | 1 CTRL | Zfp846      | 0.007 |
| Gadd45a      | 0.000672025 | 0.887322   | 0.129 | 0.098 | 1 CTRL | Gadd45a     | 0.031 |
| Trip13       | 0.000707171 | 0.8591543  | 0.049 | 0.029 | 1 CTRL | Trip13      | 0.02  |
| AU022793     | 0.000734738 | 0.70686767 | 0.056 | 0.035 | 1 CTRL | AU022793    | 0.021 |
| Trub1        | 0.000745038 | 0.74759434 | 0.035 | 0.019 | 1 CTRL | Trub1       | 0.016 |
| Aspa         | 0.000800341 | 0.96203648 | 0.018 | 0.007 | 1 CTRL | Aspa        | 0.011 |
| Fkbp1        | 0.000802394 | 0.78686948 | 0.035 | 0.019 | 1 CTRL | Fkbp1       | 0.016 |
| Mrm3         | 0.000845431 | 0.95113147 | 0.023 | 0.01  | 1 CTRL | Mrm3        | 0.013 |
| Pcid2        | 0.00084571  | 0.72165476 | 0.066 | 0.043 | 1 CTRL | Pcid2       | 0.023 |
| Igsf9        | 0.000955776 | 0.84540753 | 0.019 | 0.008 | 1 CTRL | Igsf9       | 0.011 |
| Dhrs13       | 0.000997081 | 0.98545894 | 0.019 | 0.008 | 1 CTRL | Dhrs13      | 0.011 |
| Hist1h2bb    | 0.001016229 | 0.98968019 | 0.016 | 0.006 | 1 CTRL | Hist1h2bb   | 0.01  |
| Ccne1        | 0.001032192 | 0.74635518 | 0.053 | 0.033 | 1 CTRL | Ccne1       | 0.02  |

|              |             |            |       |       |        |             |       |
|--------------|-------------|------------|-------|-------|--------|-------------|-------|
| Actr5        | 0.001062911 | 0.83879239 | 0.042 | 0.025 | 1 CTRL | Actr5       | 0.017 |
| Zfp688       | 0.001095114 | 0.776349   | 0.033 | 0.018 | 1 CTRL | Zfp688      | 0.015 |
| Enkd1        | 0.00113609  | 0.75039531 | 0.035 | 0.019 | 1 CTRL | Enkd1       | 0.016 |
| Susd1        | 0.001159326 | 1.23581933 | 0.015 | 0.006 | 1 CTRL | Susd1       | 0.009 |
| Nop2         | 0.001170725 | 0.76744747 | 0.067 | 0.044 | 1 CTRL | Nop2        | 0.023 |
| Eid2b        | 0.001216017 | 0.82689594 | 0.019 | 0.008 | 1 CTRL | Eid2b       | 0.011 |
| Nle1         | 0.001219023 | 0.72612669 | 0.039 | 0.022 | 1 CTRL | Nle1        | 0.017 |
| Fam78b       | 0.001246345 | 1.39496462 | 0.017 | 0.007 | 1 CTRL | Fam78b      | 0.01  |
| Zfp575       | 0.001286484 | 1.16608472 | 0.017 | 0.007 | 1 CTRL | Zfp575      | 0.01  |
| Enah         | 0.001291853 | 0.8887534  | 0.017 | 0.007 | 1 CTRL | Enah        | 0.01  |
| 4930589L23Ri | 0.001302184 | 1.01208432 | 0.022 | 0.01  | 1 CTRL | 4930589L23I | 0.012 |
| Pimreg       | 0.001316791 | 0.81451678 | 0.043 | 0.025 | 1 CTRL | Pimreg      | 0.018 |
| Cryab        | 0.001392427 | 0.69665142 | 0.078 | 0.054 | 1 CTRL | Cryab       | 0.024 |
| Prim1        | 0.001412652 | 0.7902949  | 0.071 | 0.047 | 1 CTRL | Prim1       | 0.024 |
| Gypa         | 0.001468106 | 2.07065637 | 0.018 | 0.008 | 1 CTRL | Gypa        | 0.01  |
| Cep44        | 0.001477684 | 0.74921816 | 0.045 | 0.027 | 1 CTRL | Cep44       | 0.018 |
| Psmc3ip      | 0.001511087 | 0.7051301  | 0.051 | 0.031 | 1 CTRL | Psmc3ip     | 0.02  |
| Pax3         | 0.001512733 | 1.27827408 | 0.03  | 0.016 | 1 CTRL | Pax3        | 0.014 |
| Tinagl1      | 0.001532066 | 1.12117978 | 0.048 | 0.03  | 1 CTRL | Tinagl1     | 0.018 |
| Fabp4        | 0.001550331 | 0.84697044 | 0.23  | 0.194 | 1 CTRL | Fabp4       | 0.036 |
| Mir670hg     | 0.001563013 | 1.09051392 | 0.018 | 0.008 | 1 CTRL | Mir670hg    | 0.01  |
| Dhodh        | 0.00158187  | 0.94996603 | 0.032 | 0.017 | 1 CTRL | Dhodh       | 0.015 |
| Cblb         | 0.001672283 | 0.73026974 | 0.122 | 0.092 | 1 CTRL | Cblb        | 0.03  |
| Fdxacb1      | 0.001739275 | 0.95791507 | 0.027 | 0.014 | 1 CTRL | Fdxacb1     | 0.013 |
| Snhg10       | 0.001770427 | 0.7855974  | 0.012 | 0.004 | 1 CTRL | Snhg10      | 0.008 |
| Nnmt         | 0.001784901 | 0.75054522 | 0.012 | 0.004 | 1 CTRL | Nnmt        | 0.008 |
| Smo          | 0.001804553 | 0.88563356 | 0.017 | 0.007 | 1 CTRL | Smo         | 0.01  |
| Selenoo      | 0.001810675 | 0.76014979 | 0.041 | 0.024 | 1 CTRL | Selenoo     | 0.017 |
| 4632404H12R  | 0.001952328 | 0.92124738 | 0.014 | 0.006 | 1 CTRL | 4632404H12  | 0.008 |
| Dctd         | 0.002025292 | 1.25513846 | 0.024 | 0.012 | 1 CTRL | Dctd        | 0.012 |
| Pcyt2        | 0.002096699 | 0.69596049 | 0.077 | 0.053 | 1 CTRL | Pcyt2       | 0.024 |
| Shc4         | 0.002168764 | 0.92025172 | 0.027 | 0.014 | 1 CTRL | Shc4        | 0.013 |
| Wdr74        | 0.002182533 | 0.76306824 | 0.019 | 0.009 | 1 CTRL | Wdr74       | 0.01  |
| Mgl2         | 0.002191377 | 0.73749833 | 0.024 | 0.012 | 1 CTRL | Mgl2        | 0.012 |
| Troap        | 0.002232008 | 0.80924663 | 0.027 | 0.014 | 1 CTRL | Troap       | 0.013 |
| Depdc1a      | 0.002445666 | 0.77965625 | 0.025 | 0.013 | 1 CTRL | Depdc1a     | 0.012 |
| Ctps         | 0.002589733 | 0.75486918 | 0.04  | 0.024 | 1 CTRL | Ctps        | 0.016 |
| Hmgb3        | 0.002607368 | 0.7367869  | 0.064 | 0.043 | 1 CTRL | Hmgb3       | 0.021 |
| Uchl1        | 0.002998542 | 0.78057221 | 0.016 | 0.007 | 1 CTRL | Uchl1       | 0.009 |
| Dkc1         | 0.003014568 | 0.73219946 | 0.076 | 0.054 | 1 CTRL | Dkc1        | 0.022 |
| Kif4         | 0.003041556 | 0.76506409 | 0.041 | 0.025 | 1 CTRL | Kif4        | 0.016 |
| Trib3        | 0.003179426 | 0.7992038  | 0.032 | 0.018 | 1 CTRL | Trib3       | 0.014 |
| Xlr          | 0.003248188 | 0.94742717 | 0.014 | 0.005 | 1 CTRL | Xlr         | 0.009 |
| Cldn12       | 0.0033536   | 1.12993955 | 0.01  | 0.003 | 1 CTRL | Cldn12      | 0.007 |
| Nedd4        | 0.003358449 | 0.82755132 | 0.093 | 0.069 | 1 CTRL | Nedd4       | 0.024 |
| Wdhd1        | 0.003435323 | 1.03007957 | 0.043 | 0.027 | 1 CTRL | Wdhd1       | 0.016 |
| Chd6         | 0.003538059 | 0.85508738 | 0.079 | 0.057 | 1 CTRL | Chd6        | 0.022 |
| Cdca7        | 0.003903769 | 0.71166032 | 0.032 | 0.019 | 1 CTRL | Cdca7       | 0.013 |
| Iqgap3       | 0.003911371 | 0.7895231  | 0.054 | 0.036 | 1 CTRL | Iqgap3      | 0.018 |
| Gm15283      | 0.003942041 | 0.82401265 | 0.025 | 0.014 | 1 CTRL | Gm15283     | 0.011 |
| Med19        | 0.004049267 | 0.70302815 | 0.072 | 0.051 | 1 CTRL | Med19       | 0.021 |
| Phf19        | 0.004052028 | 0.85795482 | 0.023 | 0.012 | 1 CTRL | Phf19       | 0.011 |
| Rabep2       | 0.004124539 | 0.95553291 | 0.038 | 0.023 | 1 CTRL | Rabep2      | 0.015 |
| Dnaaf2       | 0.004184901 | 1.06614062 | 0.012 | 0.005 | 1 CTRL | Dnaaf2      | 0.007 |
| Dgke         | 0.004204262 | 0.94956211 | 0.024 | 0.012 | 1 CTRL | Dgke        | 0.012 |
| Cxcl3        | 0.004603627 | 0.83994481 | 0.077 | 0.107 | 1 CTRL | Cxcl3       | -0.03 |
| Flrt2        | 0.004704806 | 0.72240306 | 0.033 | 0.019 | 1 CTRL | Flrt2       | 0.014 |
| Alx1         | 0.004796888 | 0.90885618 | 0.011 | 0.004 | 1 CTRL | Alx1        | 0.007 |

|             |             |            |       |       |                 |            |       |
|-------------|-------------|------------|-------|-------|-----------------|------------|-------|
| Tyr         | 0.004818118 | 0.85505704 | 0.035 | 0.021 | 1 CTRL          | Tyr        | 0.014 |
| Tigar       | 0.005038258 | 0.77979758 | 0.026 | 0.014 | 1 CTRL          | Tigar      | 0.012 |
| Bcar3       | 0.005261035 | 0.77320446 | 0.048 | 0.031 | 1 CTRL          | Bcar3      | 0.017 |
| Aire        | 0.005284883 | 1.08603657 | 0.013 | 0.005 | 1 CTRL          | Aire       | 0.008 |
| Tbc1d2      | 0.005411499 | 0.71887051 | 0.024 | 0.013 | 1 CTRL          | Tbc1d2     | 0.011 |
| 4933433G15R | 0.005427302 | 1.17150761 | 0.016 | 0.007 | 1 CTRL          | 4933433G15 | 0.009 |
| Dnmt3aos    | 0.005488274 | 0.69929696 | 0.014 | 0.006 | 1 CTRL          | Dnmt3aos   | 0.008 |
| 5430416N02R | 0.005603302 | 0.80686904 | 0.043 | 0.027 | 1 CTRL          | 5430416N02 | 0.016 |
| Nsun5       | 0.005874168 | 0.80312145 | 0.032 | 0.019 | 1 CTRL          | Nsun5      | 0.013 |
| Hist1h4d    | 0.005949346 | 0.74820522 | 0.037 | 0.023 | 1 CTRL          | Hist1h4d   | 0.014 |
| Pik3ip1     | 0.00609613  | 1.0033767  | 0.012 | 0.005 | 1 CTRL          | Pik3ip1    | 0.007 |
| Tbc1d25     | 0.006194667 | 0.84501098 | 0.017 | 0.008 | 1 CTRL          | Tbc1d25    | 0.009 |
| Twnk        | 0.006249075 | 1.19028658 | 0.019 | 0.01  | 1 CTRL          | Twnk       | 0.009 |
| Syne2       | 0.006270998 | 0.73286555 | 0.045 | 0.029 | 1 CTRL          | Syne2      | 0.016 |
| Cfap54      | 0.006353259 | 1.01533384 | 0.015 | 0.007 | 1 CTRL          | Cfap54     | 0.008 |
| Fam212a     | 0.006493146 | 0.89234265 | 0.036 | 0.022 | 1 CTRL          | Fam212a    | 0.014 |
| Pou3f1      | 0.006557961 | 0.7548505  | 0.015 | 0.007 | 1 CTRL          | Pou3f1     | 0.008 |
| Ttk         | 0.006805173 | 1.105143   | 0.024 | 0.014 | 1 CTRL          | Ttk        | 0.01  |
| Pgf         | 0.007288369 | 0.82511299 | 0.036 | 0.023 | 1 CTRL          | Pgf        | 0.013 |
| Insc        | 0.007345716 | 0.87445947 | 0.028 | 0.016 | 1 CTRL          | Insc       | 0.012 |
| Dmac2       | 0.007453382 | 0.75324719 | 0.041 | 0.026 | 1 CTRL          | Dmac2      | 0.015 |
| Kif21a      | 0.007612175 | 1.02440959 | 0.014 | 0.007 | 1 CTRL          | Kif21a     | 0.007 |
| Mc1r        | 0.007808935 | 0.80682251 | 0.032 | 0.019 | 1 CTRL          | Mc1r       | 0.013 |
| Ak4         | 0.007834489 | 0.94149168 | 0.04  | 0.025 | 1 CTRL          | Ak4        | 0.015 |
| Sh3bp4      | 0.007973095 | 0.79000487 | 0.033 | 0.02  | 1 CTRL          | Sh3bp4     | 0.013 |
| 5430427O19F | 0.008615064 | 0.74313011 | 0.074 | 0.055 | 1 CTRL          | 5430427O19 | 0.019 |
| Fxn         | 0.008688317 | 0.95651304 | 0.088 | 0.066 | 1 CTRL          | Fxn        | 0.022 |
| Dscc1       | 0.008933925 | 0.76730321 | 0.028 | 0.016 | 1 CTRL          | Dscc1      | 0.012 |
| Xrcc5       | 0.009019711 | 0.906109   | 0.021 | 0.011 | 1 CTRL          | Xrcc5      | 0.01  |
| Fam118a     | 0.009244298 | 0.98351248 | 0.022 | 0.012 | 1 CTRL          | Fam118a    | 0.01  |
| Setd6       | 0.009486925 | 0.97268816 | 0.037 | 0.024 | 1 CTRL          | Setd6      | 0.013 |
| Cystm1      | 0.009636099 | 1.0086796  | 0.041 | 0.027 | 1 CTRL          | Cystm1     | 0.014 |
| Lyz2        | 1.08817E-98 | 0.85639207 | 0.975 | 0.9   | 3.37911E-94 M28 | Lyz2       | 0.075 |
| Saa3        | 1.75859E-95 | 4.77377024 | 0.352 | 0.043 | 5.46096E-91 M28 | Saa3       | 0.309 |
| Ccl5        | 1.48448E-48 | 2.0519132  | 0.388 | 0.171 | 4.60975E-44 M28 | Ccl5       | 0.217 |
| Pde4b       | 7.60617E-46 | 1.0320046  | 0.558 | 0.343 | 2.36195E-41 M28 | Pde4b      | 0.215 |
| Mpeg1       | 2.53003E-45 | 0.70470531 | 0.771 | 0.619 | 7.8565E-41 M28  | Mpeg1      | 0.152 |
| Marcksl1    | 1.50986E-38 | 1.2958828  | 0.461 | 0.268 | 4.68857E-34 M28 | Marcksl1   | 0.193 |
| Ets2        | 1.21239E-36 | 0.85137294 | 0.586 | 0.399 | 3.76482E-32 M28 | Ets2       | 0.187 |
| C3          | 3.60893E-35 | 1.24907447 | 0.298 | 0.116 | 1.12068E-30 M28 | C3         | 0.182 |
| Csf1r       | 7.64992E-35 | 0.72733089 | 0.661 | 0.506 | 2.37553E-30 M28 | Csf1r      | 0.155 |
| mt-Nd3      | 7.51819E-33 | 0.712881   | 0.575 | 0.399 | 2.33462E-28 M28 | mt-Nd3     | 0.176 |
| Nr4a3       | 4.41811E-32 | 1.87440479 | 0.231 | 0.079 | 1.37196E-27 M28 | Nr4a3      | 0.152 |
| Tlr2        | 2.24373E-31 | 0.93968927 | 0.523 | 0.358 | 6.96746E-27 M28 | Tlr2       | 0.165 |
| Gpr132      | 6.734E-30   | 1.16214205 | 0.295 | 0.13  | 2.09111E-25 M28 | Gpr132     | 0.165 |
| Adgre1      | 1.07939E-29 | 0.82363263 | 0.591 | 0.456 | 3.35184E-25 M28 | Adgre1     | 0.135 |
| Thbs1       | 4.19165E-28 | 0.6953924  | 0.593 | 0.43  | 1.30163E-23 M28 | Thbs1      | 0.163 |
| Fosl2       | 1.90264E-27 | 0.73152701 | 0.515 | 0.344 | 5.90828E-23 M28 | Fosl2      | 0.171 |
| Arl5c       | 1.81111E-26 | 1.06069738 | 0.363 | 0.204 | 5.62403E-22 M28 | Arl5c      | 0.159 |
| Crem        | 2.2477E-25  | 1.25961077 | 0.294 | 0.147 | 6.97977E-21 M28 | Crem       | 0.147 |
| Tnfaip2     | 7.95457E-25 | 0.88741294 | 0.457 | 0.305 | 2.47013E-20 M28 | Tnfaip2    | 0.152 |
| Pltp        | 4.07626E-24 | 1.05983148 | 0.415 | 0.276 | 1.2658E-19 M28  | Pltp       | 0.139 |
| Tob2        | 6.38789E-24 | 0.95829288 | 0.36  | 0.212 | 1.98363E-19 M28 | Tob2       | 0.148 |
| Abca1       | 6.96208E-24 | 0.98725589 | 0.426 | 0.284 | 2.16193E-19 M28 | Abca1      | 0.142 |
| Map4k4      | 2.0957E-23  | 0.85432941 | 0.413 | 0.262 | 6.50777E-19 M28 | Map4k4     | 0.151 |
| Ptafr       | 1.06952E-21 | 0.98693392 | 0.366 | 0.221 | 3.32117E-17 M28 | Ptafr      | 0.145 |
| Fosb        | 1.33922E-21 | 0.74640584 | 0.483 | 0.344 | 4.15867E-17 M28 | Fosb       | 0.139 |
| Nfkb1       | 1.74317E-21 | 0.74363704 | 0.492 | 0.353 | 5.41306E-17 M28 | Nfkb1      | 0.139 |

|           |             |            |       |       |             |     |           |       |
|-----------|-------------|------------|-------|-------|-------------|-----|-----------|-------|
| Acod1     | 2.76085E-21 | 1.03637053 | 0.324 | 0.186 | 8.57326E-17 | M28 | Acod1     | 0.138 |
| Nr4a2     | 4.41533E-21 | 1.0122813  | 0.299 | 0.166 | 1.37109E-16 | M28 | Nr4a2     | 0.133 |
| Ptgs2     | 1.25783E-20 | 0.750209   | 0.536 | 0.399 | 3.90593E-16 | M28 | Ptgs2     | 0.137 |
| Ccr2      | 3.37101E-20 | 0.99013861 | 0.285 | 0.154 | 1.0468E-15  | M28 | Ccr2      | 0.131 |
| Ell2      | 5.21743E-20 | 0.92384736 | 0.309 | 0.182 | 1.62017E-15 | M28 | Ell2      | 0.127 |
| Klf4      | 5.38146E-20 | 0.81979551 | 0.437 | 0.305 | 1.6711E-15  | M28 | Klf4      | 0.132 |
| Col3a1    | 5.63759E-20 | 3.18058779 | 0.079 | 0.006 | 1.75064E-15 | M28 | Col3a1    | 0.073 |
| Trps1     | 8.11555E-20 | 0.86248311 | 0.317 | 0.184 | 2.52012E-15 | M28 | Trps1     | 0.133 |
| Selenop   | 8.21161E-20 | 0.79131733 | 0.615 | 0.508 | 2.54995E-15 | M28 | Selenop   | 0.107 |
| Rel       | 1.02871E-18 | 0.80372466 | 0.41  | 0.285 | 3.19445E-14 | M28 | Rel       | 0.125 |
| Col1a1    | 1.28832E-18 | 3.80343705 | 0.074 | 0.006 | 4.00063E-14 | M28 | Col1a1    | 0.068 |
| Tnfrsf1b  | 1.48664E-18 | 0.72213935 | 0.403 | 0.268 | 4.61645E-14 | M28 | Tnfrsf1b  | 0.135 |
| Mmp14     | 1.87421E-18 | 0.92936505 | 0.373 | 0.249 | 5.81999E-14 | M28 | Mmp14     | 0.124 |
| Ypel3     | 4.17726E-18 | 0.85538855 | 0.295 | 0.174 | 1.29716E-13 | M28 | Ypel3     | 0.121 |
| Mid1      | 5.68693E-18 | 1.60633663 | 0.141 | 0.05  | 1.76596E-13 | M28 | Mid1      | 0.091 |
| Gpr65     | 6.61487E-18 | 0.73211571 | 0.398 | 0.275 | 2.05412E-13 | M28 | Gpr65     | 0.123 |
| Nfat5     | 4.77612E-17 | 0.80471766 | 0.213 | 0.104 | 1.48313E-12 | M28 | Nfat5     | 0.109 |
| Mob1a     | 5.19399E-16 | 0.776961   | 0.382 | 0.268 | 1.61289E-11 | M28 | Mob1a     | 0.114 |
| Col1a2    | 6.26693E-15 | 2.42909589 | 0.068 | 0.009 | 1.94607E-10 | M28 | Col1a2    | 0.059 |
| Marco     | 3.15065E-14 | 2.02052059 | 0.057 | 0.005 | 9.78373E-10 | M28 | Marco     | 0.052 |
| Timp1     | 3.91338E-14 | 1.35948675 | 0.109 | 0.037 | 1.21522E-09 | M28 | Timp1     | 0.072 |
| Cd302     | 9.73771E-14 | 0.76791528 | 0.353 | 0.257 | 3.02385E-09 | M28 | Cd302     | 0.096 |
| Cyth1     | 1.91263E-13 | 0.69405588 | 0.262 | 0.164 | 5.93929E-09 | M28 | Cyth1     | 0.098 |
| Kdm7a     | 2.03298E-13 | 0.73545292 | 0.299 | 0.195 | 6.313E-09   | M28 | Kdm7a     | 0.104 |
| Rabgef1   | 3.03139E-13 | 0.8401759  | 0.238 | 0.14  | 9.41338E-09 | M28 | Rabgef1   | 0.098 |
| Sppl2a    | 4.35869E-13 | 0.80325268 | 0.314 | 0.213 | 1.3535E-08  | M28 | Sppl2a    | 0.101 |
| Areg      | 1.08715E-12 | 1.34026629 | 0.098 | 0.033 | 3.37592E-08 | M28 | Areg      | 0.065 |
| Cd38      | 1.29028E-12 | 0.81932113 | 0.334 | 0.236 | 4.00671E-08 | M28 | Cd38      | 0.098 |
| Midn      | 2.18496E-12 | 0.80699466 | 0.201 | 0.114 | 6.78496E-08 | M28 | Midn      | 0.087 |
| Sorl1     | 4.01694E-12 | 1.17758813 | 0.111 | 0.044 | 1.24738E-07 | M28 | Sorl1     | 0.067 |
| B4galt5   | 5.96199E-12 | 0.77281828 | 0.232 | 0.147 | 1.85138E-07 | M28 | B4galt5   | 0.085 |
| Gpr84     | 6.96439E-12 | 1.97217662 | 0.073 | 0.019 | 2.16265E-07 | M28 | Gpr84     | 0.054 |
| Dpysl2    | 7.20062E-12 | 1.05720211 | 0.218 | 0.136 | 2.23601E-07 | M28 | Dpysl2    | 0.082 |
| Gm34084   | 2.97101E-11 | 1.01676408 | 0.168 | 0.091 | 9.22587E-07 | M28 | Gm34084   | 0.077 |
| Neurl3    | 3.12789E-11 | 0.70260915 | 0.304 | 0.212 | 9.71303E-07 | M28 | Neurl3    | 0.092 |
| Rab11fip1 | 4.20206E-11 | 0.89187117 | 0.159 | 0.084 | 1.30487E-06 | M28 | Rab11fip1 | 0.075 |
| Atp2b4    | 4.33257E-11 | 1.75718489 | 0.081 | 0.026 | 1.34539E-06 | M28 | Atp2b4    | 0.055 |
| Bcl3      | 4.62734E-11 | 0.92484024 | 0.161 | 0.086 | 1.43693E-06 | M28 | Bcl3      | 0.075 |
| Fam174a   | 6.76751E-11 | 0.7021722  | 0.338 | 0.254 | 2.10151E-06 | M28 | Fam174a   | 0.084 |
| Man1a     | 7.89396E-11 | 0.99963965 | 0.192 | 0.115 | 2.45131E-06 | M28 | Man1a     | 0.077 |
| Dgat1     | 9.22231E-11 | 1.16314912 | 0.159 | 0.088 | 2.86381E-06 | M28 | Dgat1     | 0.071 |
| Slc35b2   | 2.51846E-10 | 0.71920463 | 0.286 | 0.202 | 7.82059E-06 | M28 | Slc35b2   | 0.084 |
| Ppp1r9b   | 3.26449E-10 | 1.12089534 | 0.198 | 0.125 | 1.01372E-05 | M28 | Ppp1r9b   | 0.073 |
| Ldlr      | 5.58227E-10 | 0.90173855 | 0.163 | 0.093 | 1.73346E-05 | M28 | Ldlr      | 0.07  |
| Gas7      | 8.36331E-10 | 0.98942476 | 0.137 | 0.072 | 2.59706E-05 | M28 | Gas7      | 0.065 |
| Idh1      | 8.67178E-10 | 0.95730259 | 0.181 | 0.109 | 2.69285E-05 | M28 | Idh1      | 0.072 |
| AI504432  | 1.04536E-09 | 0.95205273 | 0.126 | 0.063 | 3.24616E-05 | M28 | AI504432  | 0.063 |
| Fxyd2     | 1.06614E-09 | 2.50705405 | 0.059 | 0.016 | 3.3107E-05  | M28 | Fxyd2     | 0.043 |
| Hnrnp2    | 1.13599E-09 | 0.71925358 | 0.241 | 0.16  | 3.52758E-05 | M28 | Hnrnp2    | 0.081 |
| Tmbim1    | 1.20473E-09 | 0.80872362 | 0.195 | 0.12  | 3.74106E-05 | M28 | Tmbim1    | 0.075 |
| Acp2      | 1.30506E-09 | 0.7494759  | 0.25  | 0.172 | 4.05259E-05 | M28 | Acp2      | 0.078 |
| Adam10    | 1.51104E-09 | 0.8849055  | 0.228 | 0.154 | 4.69224E-05 | M28 | Adam10    | 0.074 |
| Plxnd1    | 1.51708E-09 | 0.93824499 | 0.163 | 0.095 | 4.71098E-05 | M28 | Plxnd1    | 0.068 |
| Gm15247   | 1.55801E-09 | 1.71052065 | 0.062 | 0.018 | 4.83807E-05 | M28 | Gm15247   | 0.044 |
| Cmtm6     | 1.70613E-09 | 0.94961748 | 0.192 | 0.122 | 5.29805E-05 | M28 | Cmtm6     | 0.07  |
| Sgsh      | 2.16556E-09 | 1.33811373 | 0.087 | 0.035 | 6.72471E-05 | M28 | Sgsh      | 0.052 |
| Nfkbie    | 2.21275E-09 | 0.71534824 | 0.212 | 0.136 | 6.87126E-05 | M28 | Nfkbie    | 0.076 |
| Tmem176a  | 3.24207E-09 | 1.14115483 | 0.184 | 0.116 | 0.000100676 | M28 | Tmem176a  | 0.068 |

|             |             |            |       |       |                 |            |       |
|-------------|-------------|------------|-------|-------|-----------------|------------|-------|
| Raph1       | 4.0662E-09  | 0.87420406 | 0.169 | 0.102 | 0.000126268 M28 | Raph1      | 0.067 |
| Cdc42ep4    | 4.5981E-09  | 1.15592727 | 0.146 | 0.083 | 0.000142785 M28 | Cdc42ep4   | 0.063 |
| Fn1         | 4.69653E-09 | 0.832207   | 0.285 | 0.202 | 0.000145841 M28 | Fn1        | 0.083 |
| Cwc25       | 4.76722E-09 | 0.94384245 | 0.152 | 0.088 | 0.000148036 M28 | Cwc25      | 0.064 |
| Csf3r       | 5.01164E-09 | 0.79545399 | 0.136 | 0.073 | 0.000155627 M28 | Csf3r      | 0.063 |
| Sema4a      | 7.06386E-09 | 1.13879244 | 0.125 | 0.067 | 0.000219354 M28 | Sema4a     | 0.058 |
| Arap1       | 8.2168E-09  | 0.82188966 | 0.264 | 0.195 | 0.000255156 M28 | Arap1      | 0.069 |
| Ctla2a      | 9.3901E-09  | 0.7324267  | 0.087 | 0.037 | 0.000291591 M28 | Ctla2a     | 0.05  |
| Rras        | 9.81408E-09 | 0.7147612  | 0.205 | 0.133 | 0.000304757 M28 | Rras       | 0.072 |
| Mmp9        | 1.073E-08   | 4.58442548 | 0.027 | 0     | 0.000333199 M28 | Mmp9       | 0.027 |
| Il2rb       | 1.22478E-08 | 3.00469372 | 0.037 | 0.005 | 0.00038033 M28  | Il2rb      | 0.032 |
| Gm15726     | 1.47945E-08 | 2.51647025 | 0.044 | 0.009 | 0.000459413 M28 | Gm15726    | 0.035 |
| Cd300ld     | 1.60987E-08 | 0.77616726 | 0.21  | 0.141 | 0.000499912 M28 | Cd300ld    | 0.069 |
| Prkcb       | 2.10329E-08 | 0.70684614 | 0.144 | 0.083 | 0.000653136 M28 | Prkcb      | 0.061 |
| 2810403A07R | 2.51136E-08 | 0.8765892  | 0.12  | 0.064 | 0.000779854 M28 | 2810403A07 | 0.056 |
| Madd        | 2.69041E-08 | 1.16505282 | 0.109 | 0.057 | 0.000835452 M28 | Madd       | 0.052 |
| Adora2b     | 2.7118E-08  | 0.84528067 | 0.143 | 0.082 | 0.000842096 M28 | Adora2b    | 0.061 |
| S100a8      | 2.75839E-08 | 0.80042149 | 0.112 | 0.057 | 0.000856564 M28 | S100a8     | 0.055 |
| Ly6c2       | 2.85442E-08 | 0.75409143 | 0.17  | 0.102 | 0.000886384 M28 | Ly6c2      | 0.068 |
| Nrg1        | 3.10951E-08 | 1.30048057 | 0.067 | 0.024 | 0.000965597 M28 | Nrg1       | 0.043 |
| Arl5a       | 3.3007E-08  | 0.79747274 | 0.168 | 0.104 | 0.001024967 M28 | Arl5a      | 0.064 |
| Ube3a       | 4.64593E-08 | 0.72859213 | 0.2   | 0.133 | 0.0014427 M28   | Ube3a      | 0.067 |
| Gnpda1      | 4.81002E-08 | 0.72101022 | 0.188 | 0.123 | 0.001493655 M28 | Gnpda1     | 0.065 |
| Tmem88      | 6.33146E-08 | 0.75487931 | 0.139 | 0.082 | 0.00196611 M28  | Tmem88     | 0.057 |
| Tmcc1       | 7.87981E-08 | 1.2459793  | 0.112 | 0.06  | 0.002446918 M28 | Tmcc1      | 0.052 |
| Zfp516      | 8.53465E-08 | 0.94328237 | 0.175 | 0.113 | 0.002650265 M28 | Zfp516     | 0.062 |
| Washc4      | 9.21787E-08 | 0.83694604 | 0.119 | 0.066 | 0.002862425 M28 | Washc4     | 0.053 |
| Mefv        | 1.21195E-07 | 0.79234623 | 0.103 | 0.052 | 0.003763473 M28 | Mefv       | 0.051 |
| S1pr1       | 1.35655E-07 | 1.7618999  | 0.032 | 0.004 | 0.004212508 M28 | S1pr1      | 0.028 |
| Sp100       | 1.47629E-07 | 0.7847391  | 0.223 | 0.158 | 0.004584318 M28 | Sp100      | 0.065 |
| Zfhx3       | 2.05157E-07 | 0.85313083 | 0.14  | 0.084 | 0.006370728 M28 | Zfhx3      | 0.056 |
| Lcn2        | 2.10325E-07 | 1.55729281 | 0.066 | 0.026 | 0.006531214 M28 | Lcn2       | 0.04  |
| Olr1        | 2.13457E-07 | 1.14567376 | 0.07  | 0.03  | 0.006628489 M28 | Olr1       | 0.04  |
| Susd6       | 2.52221E-07 | 0.72347016 | 0.178 | 0.118 | 0.00783221 M28  | Susd6      | 0.06  |
| Fchsd2      | 2.67488E-07 | 1.18146657 | 0.065 | 0.026 | 0.008306309 M28 | Fchsd2     | 0.039 |
| Bgn         | 2.84374E-07 | 2.00590743 | 0.029 | 0.003 | 0.008830675 M28 | Bgn        | 0.026 |
| Nkg7        | 3.68285E-07 | 1.94757856 | 0.046 | 0.014 | 0.011436356 M28 | Nkg7       | 0.032 |
| Sgk3        | 3.90487E-07 | 0.99448676 | 0.122 | 0.072 | 0.012125785 M28 | Sgk3       | 0.05  |
| Csf3        | 3.91365E-07 | 1.61013911 | 0.056 | 0.02  | 0.012153042 M28 | Csf3       | 0.036 |
| Fam102b     | 4.64917E-07 | 0.9574491  | 0.138 | 0.084 | 0.014437068 M28 | Fam102b    | 0.054 |
| Srxn1       | 4.75358E-07 | 0.85072018 | 0.161 | 0.105 | 0.014761279 M28 | Srxn1      | 0.056 |
| Tmem176b    | 5.16357E-07 | 0.7172404  | 0.247 | 0.185 | 0.01603442 M28  | Tmem176b   | 0.062 |
| Arhgef10l   | 5.85789E-07 | 0.85431868 | 0.1   | 0.053 | 0.018190503 M28 | Arhgef10l  | 0.047 |
| Slc36a1     | 5.95836E-07 | 1.1543992  | 0.087 | 0.044 | 0.018502486 M28 | Slc36a1    | 0.043 |
| Nfam1       | 5.9603E-07  | 0.80007957 | 0.169 | 0.112 | 0.018508521 M28 | Nfam1      | 0.057 |
| Rab43       | 6.60957E-07 | 0.9904047  | 0.084 | 0.041 | 0.020524704 M28 | Rab43      | 0.043 |
| Abcc3       | 6.98068E-07 | 0.70491463 | 0.152 | 0.098 | 0.021677096 M28 | Abcc3      | 0.054 |
| Birc2       | 8.39158E-07 | 1.06119685 | 0.093 | 0.05  | 0.026058363 M28 | Birc2      | 0.043 |
| Ids         | 1.15045E-06 | 1.13871983 | 0.078 | 0.038 | 0.035724931 M28 | Ids        | 0.04  |
| Add3        | 1.33275E-06 | 1.55282399 | 0.063 | 0.027 | 0.041386024 M28 | Add3       | 0.036 |
| Fas         | 1.50319E-06 | 1.22532713 | 0.072 | 0.034 | 0.046678694 M28 | Fas        | 0.038 |
| Pxk         | 1.75649E-06 | 0.80376017 | 0.159 | 0.106 | 0.054544342 M28 | Pxk        | 0.053 |
| Trim30a     | 1.8793E-06  | 0.73661382 | 0.184 | 0.127 | 0.058357934 M28 | Trim30a    | 0.057 |
| Notch2      | 1.96413E-06 | 0.77859807 | 0.112 | 0.066 | 0.060992268 M28 | Notch2     | 0.046 |
| Vwa5a       | 2.05948E-06 | 0.73859575 | 0.178 | 0.125 | 0.063953008 M28 | Vwa5a      | 0.053 |
| Specc1l     | 2.30292E-06 | 0.78971171 | 0.161 | 0.109 | 0.071512501 M28 | Specc1l    | 0.052 |
| Cp          | 2.51166E-06 | 2.15087549 | 0.043 | 0.014 | 0.07799449 M28  | Cp         | 0.029 |
| Apaf1       | 2.6735E-06  | 0.83261559 | 0.103 | 0.059 | 0.083020316 M28 | Apaf1      | 0.044 |



|              |             |            |       |       |             |     |             |       |
|--------------|-------------|------------|-------|-------|-------------|-----|-------------|-------|
| Actn1        | 2.68885E-06 | 0.78613548 | 0.093 | 0.051 | 0.083496795 | M28 | Actn1       | 0.042 |
| Avpi1        | 2.78459E-06 | 1.13319463 | 0.107 | 0.063 | 0.086469826 | M28 | Avpi1       | 0.044 |
| Ighm         | 3.1708E-06  | 0.78858711 | 0.133 | 0.085 | 0.098462819 | M28 | Ighm        | 0.048 |
| Tbl1xr1      | 3.25329E-06 | 0.83740457 | 0.123 | 0.076 | 0.101024522 | M28 | Tbl1xr1     | 0.047 |
| Trp53inp2    | 3.75532E-06 | 0.81563967 | 0.095 | 0.053 | 0.116614057 | M28 | Trp53inp2   | 0.042 |
| Acox3        | 3.93621E-06 | 0.7846408  | 0.113 | 0.068 | 0.122231281 | M28 | Acox3       | 0.045 |
| Gzma         | 4.08325E-06 | 3.62475131 | 0.023 | 0.003 | 0.126797122 | M28 | Gzma        | 0.02  |
| Lats2        | 4.34105E-06 | 0.69788664 | 0.101 | 0.057 | 0.134802658 | M28 | Lats2       | 0.044 |
| Fpr2         | 5.11891E-06 | 0.83771552 | 0.104 | 0.061 | 0.158957438 | M28 | Fpr2        | 0.043 |
| Ophn1        | 5.14083E-06 | 1.1684236  | 0.082 | 0.044 | 0.159638135 | M28 | Ophn1       | 0.038 |
| Chst1        | 5.39689E-06 | 1.87509256 | 0.029 | 0.006 | 0.167589583 | M28 | Chst1       | 0.023 |
| Slc26a2      | 5.74454E-06 | 0.76802452 | 0.109 | 0.066 | 0.178385052 | M28 | Slc26a2     | 0.043 |
| Lyz1         | 5.81163E-06 | 1.64432006 | 0.052 | 0.021 | 0.180468583 | M28 | Lyz1        | 0.031 |
| Psme4        | 6.4697E-06  | 0.72353931 | 0.166 | 0.116 | 0.200903451 | M28 | Psme4       | 0.05  |
| Ptpro        | 6.68373E-06 | 0.81004026 | 0.097 | 0.056 | 0.207549999 | M28 | Ptpro       | 0.041 |
| Phf21a       | 7.68521E-06 | 0.98269374 | 0.092 | 0.052 | 0.238648839 | M28 | Phf21a      | 0.04  |
| Rassf3       | 7.76921E-06 | 0.72566639 | 0.216 | 0.163 | 0.24125727  | M28 | Rassf3      | 0.053 |
| Plxnc1       | 8.03777E-06 | 0.77795225 | 0.083 | 0.045 | 0.249596854 | M28 | Plxnc1      | 0.038 |
| Reps2        | 8.66758E-06 | 2.0956368  | 0.028 | 0.006 | 0.269154385 | M28 | Reps2       | 0.022 |
| Cat          | 8.88111E-06 | 0.74864493 | 0.162 | 0.111 | 0.275785225 | M28 | Cat         | 0.051 |
| Rrad         | 9.38725E-06 | 0.78810423 | 0.073 | 0.037 | 0.291502296 | M28 | Rrad        | 0.036 |
| Gdpd1        | 9.46113E-06 | 0.92401509 | 0.114 | 0.072 | 0.293796588 | M28 | Gdpd1       | 0.042 |
| St6gal1      | 9.54248E-06 | 0.82061759 | 0.059 | 0.027 | 0.296322591 | M28 | St6gal1     | 0.032 |
| Arhgef6      | 9.57754E-06 | 0.8727157  | 0.104 | 0.062 | 0.297411215 | M28 | Arhgef6     | 0.042 |
| Tmem164      | 9.64524E-06 | 0.74904137 | 0.128 | 0.082 | 0.29951349  | M28 | Tmem164     | 0.046 |
| Antxr2       | 1.22211E-05 | 0.80950738 | 0.119 | 0.076 | 0.379501976 | M28 | Antxr2      | 0.043 |
| Adora2a      | 1.2348E-05  | 1.44981135 | 0.037 | 0.012 | 0.383441681 | M28 | Adora2a     | 0.025 |
| G0s2         | 1.35042E-05 | 2.63999287 | 0.032 | 0.009 | 0.419346924 | M28 | G0s2        | 0.023 |
| Gja1         | 1.50197E-05 | 1.55107696 | 0.032 | 0.009 | 0.466406797 | M28 | Gja1        | 0.023 |
| Thy1         | 1.63682E-05 | 1.73554723 | 0.024 | 0.004 | 0.508281625 | M28 | Thy1        | 0.02  |
| Gm9733       | 1.81296E-05 | 1.15423011 | 0.057 | 0.026 | 0.562977771 | M28 | Gm9733      | 0.031 |
| Gimap3       | 1.91915E-05 | 2.28588689 | 0.019 | 0.002 | 0.595952659 | M28 | Gimap3      | 0.017 |
| Rp2          | 1.97261E-05 | 0.74318543 | 0.117 | 0.075 | 0.612554573 | M28 | Rp2         | 0.042 |
| Slc44a1      | 1.99545E-05 | 0.93801585 | 0.068 | 0.035 | 0.619645883 | M28 | Slc44a1     | 0.033 |
| Ramp1        | 2.04112E-05 | 0.85461656 | 0.139 | 0.095 | 0.633829687 | M28 | Ramp1       | 0.044 |
| Al839979     | 2.07887E-05 | 0.75004826 | 0.1   | 0.06  | 0.645550688 | M28 | Al839979    | 0.04  |
| Kmt2d        | 2.0866E-05  | 0.7362555  | 0.072 | 0.037 | 0.647951607 | M28 | Kmt2d       | 0.035 |
| Ednrb        | 2.1387E-05  | 1.60711007 | 0.047 | 0.019 | 0.664132004 | M28 | Ednrb       | 0.028 |
| Cib2         | 2.54402E-05 | 1.28337529 | 0.045 | 0.019 | 0.789993858 | M28 | Cib2        | 0.026 |
| Nacc2        | 2.67305E-05 | 1.04868137 | 0.087 | 0.051 | 0.830063148 | M28 | Nacc2       | 0.036 |
| Ptpn12       | 2.68913E-05 | 0.71822396 | 0.124 | 0.081 | 0.835055882 | M28 | Ptpn12      | 0.043 |
| 9930021J03Ri | 2.74478E-05 | 1.14560638 | 0.063 | 0.032 | 0.852337121 | M28 | 9930021J03F | 0.031 |
| Rnf111       | 3.03222E-05 | 0.81593303 | 0.109 | 0.068 | 0.941596714 | M28 | Rnf111      | 0.041 |
| Gm5547       | 3.34794E-05 | 1.3470987  | 0.051 | 0.023 | 1           | M28 | Gm5547      | 0.028 |
| Rnf145       | 3.69631E-05 | 1.29723578 | 0.063 | 0.033 | 1           | M28 | Rnf145      | 0.03  |
| Fkbp1b       | 4.58942E-05 | 1.02671905 | 0.075 | 0.042 | 1           | M28 | Fkbp1b      | 0.033 |
| Manba        | 5.18172E-05 | 1.02713339 | 0.06  | 0.03  | 1           | M28 | Manba       | 0.03  |
| Wwp1         | 5.24119E-05 | 0.74243312 | 0.188 | 0.143 | 1           | M28 | Wwp1        | 0.045 |
| Pls3         | 5.58466E-05 | 1.61284281 | 0.02  | 0.003 | 1           | M28 | Pls3        | 0.017 |
| Lif          | 6.25788E-05 | 1.37054807 | 0.042 | 0.018 | 1           | M28 | Lif         | 0.024 |
| Sulf2        | 6.28364E-05 | 1.00231519 | 0.096 | 0.06  | 1           | M28 | Sulf2       | 0.036 |
| Rabgap1l     | 6.73087E-05 | 1.53464344 | 0.032 | 0.011 | 1           | M28 | Rabgap1l    | 0.021 |
| Itfg1        | 6.83451E-05 | 0.73818461 | 0.108 | 0.07  | 1           | M28 | Itfg1       | 0.038 |
| Cd80         | 6.88188E-05 | 1.00386813 | 0.064 | 0.034 | 1           | M28 | Cd80        | 0.03  |
| Tmx3         | 6.91323E-05 | 0.72984157 | 0.117 | 0.078 | 1           | M28 | Tmx3        | 0.039 |
| Zbtb11       | 7.62242E-05 | 0.94706931 | 0.06  | 0.031 | 1           | M28 | Zbtb11      | 0.029 |
| Rnasel       | 9.03728E-05 | 0.77111323 | 0.136 | 0.095 | 1           | M28 | Rnasel      | 0.041 |
| Hpgd         | 9.52787E-05 | 1.68939186 | 0.024 | 0.006 | 1           | M28 | Hpgd        | 0.018 |

|            |             |            |       |       |       |            |       |
|------------|-------------|------------|-------|-------|-------|------------|-------|
| Procr      | 9.91421E-05 | 1.02858689 | 0.057 | 0.029 | 1 M28 | Procr      | 0.028 |
| Fam110a    | 0.000101476 | 0.7786148  | 0.098 | 0.062 | 1 M28 | Fam110a    | 0.036 |
| Irgm2      | 0.000102306 | 1.24388575 | 0.049 | 0.024 | 1 M28 | Irgm2      | 0.025 |
| Camkk2     | 0.000102877 | 0.81097794 | 0.117 | 0.08  | 1 M28 | Camkk2     | 0.037 |
| Phf8       | 0.000119346 | 1.41292698 | 0.044 | 0.02  | 1 M28 | Phf8       | 0.024 |
| Camk1d     | 0.000130802 | 0.71540588 | 0.142 | 0.103 | 1 M28 | Camk1d     | 0.039 |
| Gimap4     | 0.000132226 | 2.14313578 | 0.02  | 0.004 | 1 M28 | Gimap4     | 0.016 |
| Fpr1       | 0.000132999 | 1.24820623 | 0.039 | 0.016 | 1 M28 | Fpr1       | 0.023 |
| Trbc2      | 0.000140324 | 1.63104396 | 0.032 | 0.012 | 1 M28 | Trbc2      | 0.02  |
| Cdk5rap1   | 0.000151795 | 1.25223985 | 0.031 | 0.011 | 1 M28 | Cdk5rap1   | 0.02  |
| Pkp3       | 0.000157997 | 1.10197934 | 0.027 | 0.008 | 1 M28 | Pkp3       | 0.019 |
| Klrd1      | 0.000163402 | 1.74181271 | 0.028 | 0.009 | 1 M28 | Klrd1      | 0.019 |
| Tlr1       | 0.000166262 | 1.24298437 | 0.073 | 0.043 | 1 M28 | Tlr1       | 0.03  |
| Pmepa1     | 0.00017311  | 0.98478594 | 0.085 | 0.052 | 1 M28 | Pmepa1     | 0.033 |
| Zdhhc8     | 0.000176298 | 1.49606007 | 0.031 | 0.011 | 1 M28 | Zdhhc8     | 0.02  |
| Dock8      | 0.000183648 | 0.69547163 | 0.114 | 0.078 | 1 M28 | Dock8      | 0.036 |
| Nod1       | 0.000201938 | 0.98061245 | 0.066 | 0.038 | 1 M28 | Nod1       | 0.028 |
| Foxj2      | 0.000210738 | 1.09881778 | 0.048 | 0.024 | 1 M28 | Foxj2      | 0.024 |
| Scn1b      | 0.000211545 | 0.91650883 | 0.061 | 0.034 | 1 M28 | Scn1b      | 0.027 |
| Spic       | 0.000217061 | 1.58746023 | 0.039 | 0.017 | 1 M28 | Spic       | 0.022 |
| Nod2       | 0.000231935 | 1.03688638 | 0.042 | 0.019 | 1 M28 | Nod2       | 0.023 |
| Mmp2       | 0.000239055 | 1.70535006 | 0.016 | 0.003 | 1 M28 | Mmp2       | 0.013 |
| Osbpl3     | 0.000254363 | 1.10809384 | 0.046 | 0.023 | 1 M28 | Osbpl3     | 0.023 |
| Ccdc152    | 0.000262512 | 1.36459124 | 0.036 | 0.015 | 1 M28 | Ccdc152    | 0.021 |
| Mfsd6      | 0.000263254 | 0.95493688 | 0.048 | 0.024 | 1 M28 | Mfsd6      | 0.024 |
| Flrt3      | 0.000264369 | 0.99850295 | 0.04  | 0.018 | 1 M28 | Flrt3      | 0.022 |
| Tmem135    | 0.000270845 | 0.88777479 | 0.082 | 0.051 | 1 M28 | Tmem135    | 0.031 |
| B3gnt5     | 0.000273894 | 0.98626483 | 0.05  | 0.025 | 1 M28 | B3gnt5     | 0.025 |
| Cd3d       | 0.00027809  | 1.48883697 | 0.029 | 0.01  | 1 M28 | Cd3d       | 0.019 |
| Gpr162     | 0.000280866 | 1.5109855  | 0.016 | 0.003 | 1 M28 | Gpr162     | 0.013 |
| Ctsw       | 0.000288457 | 1.61953811 | 0.02  | 0.005 | 1 M28 | Ctsw       | 0.015 |
| Evi5       | 0.00028846  | 0.725962   | 0.078 | 0.048 | 1 M28 | Evi5       | 0.03  |
| Mllt6      | 0.000298512 | 0.84660984 | 0.096 | 0.064 | 1 M28 | Mllt6      | 0.032 |
| Capn15     | 0.000305307 | 1.31476898 | 0.03  | 0.011 | 1 M28 | Capn15     | 0.019 |
| Rasgrp4    | 0.000311433 | 0.89896068 | 0.056 | 0.03  | 1 M28 | Rasgrp4    | 0.026 |
| Csgalnact2 | 0.000312833 | 0.74683378 | 0.064 | 0.036 | 1 M28 | Csgalnact2 | 0.028 |
| Fbxo38     | 0.000322793 | 0.8492906  | 0.065 | 0.038 | 1 M28 | Fbxo38     | 0.027 |
| Taf4       | 0.000357298 | 0.94386112 | 0.044 | 0.021 | 1 M28 | Taf4       | 0.023 |
| Cyp51      | 0.000357866 | 0.90032682 | 0.089 | 0.057 | 1 M28 | Cyp51      | 0.032 |
| Gzmb       | 0.000393368 | 2.17928585 | 0.019 | 0.004 | 1 M28 | Gzmb       | 0.015 |
| Pxdc1      | 0.000435007 | 1.72723846 | 0.031 | 0.013 | 1 M28 | Pxdc1      | 0.018 |
| Arid3a     | 0.00044029  | 0.80378644 | 0.051 | 0.027 | 1 M28 | Arid3a     | 0.024 |
| S100a9     | 0.000450533 | 1.64531608 | 0.054 | 0.03  | 1 M28 | S100a9     | 0.024 |
| Ptgfrn     | 0.000456413 | 1.37918124 | 0.022 | 0.007 | 1 M28 | Ptgfrn     | 0.015 |
| Ints13     | 0.000465922 | 0.74777011 | 0.054 | 0.03  | 1 M28 | Ints13     | 0.024 |
| Slc39a4    | 0.00047009  | 1.76612473 | 0.01  | 0     | 1 M28 | Slc39a4    | 0.01  |
| Cd3g       | 0.000475291 | 1.83028382 | 0.03  | 0.012 | 1 M28 | Cd3g       | 0.018 |
| Tbc1d4     | 0.000486627 | 0.94850814 | 0.041 | 0.019 | 1 M28 | Tbc1d4     | 0.022 |
| Ampd3      | 0.000506209 | 1.03058923 | 0.061 | 0.035 | 1 M28 | Ampd3      | 0.026 |
| Fry        | 0.000529879 | 0.97311489 | 0.03  | 0.012 | 1 M28 | Fry        | 0.018 |
| Nlrc3      | 0.000560698 | 1.4947455  | 0.022 | 0.007 | 1 M28 | Nlrc3      | 0.015 |
| Bvht       | 0.000595821 | 0.81539069 | 0.048 | 0.025 | 1 M28 | Bvht       | 0.023 |
| Ms4a4b     | 0.000599061 | 0.95590247 | 0.043 | 0.022 | 1 M28 | Ms4a4b     | 0.021 |
| Oas3       | 0.00060431  | 0.80044515 | 0.086 | 0.057 | 1 M28 | Oas3       | 0.029 |
| Tk2        | 0.000610295 | 0.74760089 | 0.063 | 0.037 | 1 M28 | Tk2        | 0.026 |
| Abcg3      | 0.000623775 | 1.03646173 | 0.063 | 0.038 | 1 M28 | Abcg3      | 0.025 |
| Cd55       | 0.000709371 | 1.17899588 | 0.016 | 0.003 | 1 M28 | Cd55       | 0.013 |
| Spata2     | 0.000730409 | 0.83237429 | 0.065 | 0.04  | 1 M28 | Spata2     | 0.025 |

|          |             |            |       |       |       |          |       |
|----------|-------------|------------|-------|-------|-------|----------|-------|
| Adam30   | 0.000735048 | 1.17660705 | 0.025 | 0.009 | 1 M28 | Adam30   | 0.016 |
| Cst7     | 0.000740361 | 1.13780426 | 0.024 | 0.008 | 1 M28 | Cst7     | 0.016 |
| Mbp      | 0.000780604 | 0.9476328  | 0.077 | 0.049 | 1 M28 | Mbp      | 0.028 |
| Trac     | 0.000787631 | 1.77889441 | 0.024 | 0.008 | 1 M28 | Trac     | 0.016 |
| Rnf41    | 0.000790193 | 0.87092785 | 0.058 | 0.034 | 1 M28 | Rnf41    | 0.024 |
| Parp8    | 0.000858274 | 0.71496881 | 0.071 | 0.045 | 1 M28 | Parp8    | 0.026 |
| Slc35f5  | 0.000899484 | 0.81870192 | 0.056 | 0.032 | 1 M28 | Slc35f5  | 0.024 |
| Epb4113  | 0.000905322 | 1.44048517 | 0.016 | 0.003 | 1 M28 | Epb4113  | 0.013 |
| Abca9    | 0.00090685  | 1.06013874 | 0.026 | 0.01  | 1 M28 | Abca9    | 0.016 |
| Skap1    | 0.000914674 | 1.50208762 | 0.016 | 0.003 | 1 M28 | Skap1    | 0.013 |
| Dmkn     | 0.0009395   | 1.19415575 | 0.029 | 0.012 | 1 M28 | Dmkn     | 0.017 |
| P2ry10   | 0.000961056 | 0.93443945 | 0.021 | 0.007 | 1 M28 | P2ry10   | 0.014 |
| Tmem38b  | 0.001019897 | 0.73866935 | 0.122 | 0.089 | 1 M28 | Tmem38b  | 0.033 |
| Atp11c   | 0.001043233 | 0.96310857 | 0.045 | 0.024 | 1 M28 | Atp11c   | 0.021 |
| Ramp3    | 0.001054402 | 1.38965582 | 0.025 | 0.009 | 1 M28 | Ramp3    | 0.016 |
| Homer1   | 0.001054747 | 0.81044391 | 0.064 | 0.039 | 1 M28 | Homer1   | 0.025 |
| Glipr2   | 0.001075652 | 0.73738848 | 0.067 | 0.041 | 1 M28 | Glipr2   | 0.026 |
| Vps13b   | 0.001092222 | 0.78098725 | 0.078 | 0.051 | 1 M28 | Vps13b   | 0.027 |
| Hivep1   | 0.001099358 | 0.72123362 | 0.087 | 0.059 | 1 M28 | Hivep1   | 0.028 |
| Fbxl2    | 0.001174999 | 1.49749019 | 0.019 | 0.006 | 1 M28 | Fbxl2    | 0.013 |
| Slc40a1  | 0.001245805 | 1.55593163 | 0.031 | 0.014 | 1 M28 | Slc40a1  | 0.017 |
| Tnfrsf14 | 0.001292517 | 1.71768117 | 0.01  | 0.001 | 1 M28 | Tnfrsf14 | 0.009 |
| Rbm12b2  | 0.001328079 | 1.66166357 | 0.015 | 0.003 | 1 M28 | Rbm12b2  | 0.012 |
| Hip1r    | 0.001422862 | 0.79703325 | 0.012 | 0.002 | 1 M28 | Hip1r    | 0.01  |
| Acbd5    | 0.001433495 | 0.71422218 | 0.087 | 0.059 | 1 M28 | Acbd5    | 0.028 |
| Cstf3    | 0.001530587 | 0.85583782 | 0.069 | 0.044 | 1 M28 | Cstf3    | 0.025 |
| Gramd3   | 0.00157701  | 1.31042642 | 0.038 | 0.019 | 1 M28 | Gramd3   | 0.019 |
| Taf2     | 0.001594156 | 0.73871114 | 0.047 | 0.026 | 1 M28 | Taf2     | 0.021 |
| Zhx1     | 0.001704178 | 0.78982954 | 0.071 | 0.046 | 1 M28 | Zhx1     | 0.025 |
| Plpp3    | 0.001746198 | 0.85325552 | 0.036 | 0.018 | 1 M28 | Plpp3    | 0.018 |
| Lat      | 0.001772091 | 0.9504751  | 0.019 | 0.006 | 1 M28 | Lat      | 0.013 |
| Zfp667   | 0.001816849 | 0.7461954  | 0.077 | 0.051 | 1 M28 | Zfp667   | 0.026 |
| Setx     | 0.001864695 | 0.7629213  | 0.072 | 0.047 | 1 M28 | Setx     | 0.025 |
| Bend4    | 0.001891386 | 0.70575193 | 0.034 | 0.017 | 1 M28 | Bend4    | 0.017 |
| Itpr2    | 0.001913141 | 0.72161228 | 0.075 | 0.05  | 1 M28 | Itpr2    | 0.025 |
| Sh2d2a   | 0.00194534  | 1.24757566 | 0.021 | 0.008 | 1 M28 | Sh2d2a   | 0.013 |
| Rnf103   | 0.002102455 | 0.770238   | 0.073 | 0.048 | 1 M28 | Rnf103   | 0.025 |
| Exoc3l4  | 0.002120908 | 1.02928696 | 0.033 | 0.016 | 1 M28 | Exoc3l4  | 0.017 |
| Postn    | 0.002121134 | 1.60569507 | 0.013 | 0.003 | 1 M28 | Postn    | 0.01  |
| Pdgfb    | 0.002174175 | 0.82716661 | 0.064 | 0.041 | 1 M28 | Pdgfb    | 0.023 |
| Cd2      | 0.002272782 | 1.06431871 | 0.018 | 0.006 | 1 M28 | Cd2      | 0.012 |
| Cdk19    | 0.002274996 | 0.74589099 | 0.071 | 0.046 | 1 M28 | Cdk19    | 0.025 |
| Dcn      | 0.002302219 | 1.16911828 | 0.01  | 0.001 | 1 M28 | Dcn      | 0.009 |
| Kat2b    | 0.002356303 | 0.78548263 | 0.071 | 0.047 | 1 M28 | Kat2b    | 0.024 |
| Uba6     | 0.002410193 | 0.71878953 | 0.076 | 0.051 | 1 M28 | Uba6     | 0.025 |
| Adra2b   | 0.002446835 | 1.42021405 | 0.015 | 0.004 | 1 M28 | Adra2b   | 0.011 |
| Ticam2   | 0.002460802 | 0.97427155 | 0.035 | 0.018 | 1 M28 | Ticam2   | 0.017 |
| P2ry13   | 0.002549305 | 1.13830257 | 0.035 | 0.018 | 1 M28 | P2ry13   | 0.017 |
| Vcan     | 0.002645246 | 0.73862436 | 0.085 | 0.059 | 1 M28 | Vcan     | 0.026 |
| Ptgs1    | 0.002661123 | 0.94795433 | 0.032 | 0.016 | 1 M28 | Ptgs1    | 0.016 |
| Cd8a     | 0.00276295  | 1.63247395 | 0.015 | 0.004 | 1 M28 | Cd8a     | 0.011 |
| Chpf2    | 0.002819301 | 0.77443417 | 0.081 | 0.056 | 1 M28 | Chpf2    | 0.025 |
| Acta2    | 0.002871074 | 1.0515139  | 0.029 | 0.014 | 1 M28 | Acta2    | 0.015 |
| Gpr18    | 0.002893926 | 1.16200099 | 0.023 | 0.009 | 1 M28 | Gpr18    | 0.014 |
| Slamf6   | 0.002917119 | 0.71902952 | 0.05  | 0.03  | 1 M28 | Slamf6   | 0.02  |
| Exoc6    | 0.002975622 | 0.84223319 | 0.056 | 0.035 | 1 M28 | Exoc6    | 0.021 |
| Fbxl17   | 0.003144694 | 1.00334465 | 0.048 | 0.029 | 1 M28 | Fbxl17   | 0.019 |
| L1cam    | 0.003173129 | 1.54821323 | 0.012 | 0.003 | 1 M28 | L1cam    | 0.009 |

|             |             |            |       |       |       |            |       |
|-------------|-------------|------------|-------|-------|-------|------------|-------|
| Trbc1       | 0.003193298 | 1.79573281 | 0.016 | 0.005 | 1 M28 | Trbc1      | 0.011 |
| Ptges       | 0.003293625 | 0.74929109 | 0.041 | 0.023 | 1 M28 | Ptges      | 0.018 |
| Atrnl1      | 0.003332631 | 1.31193777 | 0.026 | 0.012 | 1 M28 | Atrnl1     | 0.014 |
| Ago1        | 0.003481099 | 0.81385992 | 0.047 | 0.028 | 1 M28 | Ago1       | 0.019 |
| Inpp4a      | 0.003568345 | 0.74578923 | 0.055 | 0.035 | 1 M28 | Inpp4a     | 0.02  |
| Il18rap     | 0.003606601 | 0.92412882 | 0.021 | 0.008 | 1 M28 | Il18rap    | 0.013 |
| Col6a1      | 0.003634013 | 1.17739903 | 0.012 | 0.003 | 1 M28 | Col6a1     | 0.009 |
| Ptprcap     | 0.003648881 | 1.50092941 | 0.026 | 0.012 | 1 M28 | Ptprcap    | 0.014 |
| Atxn1       | 0.003721041 | 1.00151957 | 0.077 | 0.054 | 1 M28 | Atxn1      | 0.023 |
| Rgs18       | 0.003734058 | 1.09287158 | 0.017 | 0.006 | 1 M28 | Rgs18      | 0.011 |
| Sord        | 0.003997795 | 0.74266687 | 0.083 | 0.058 | 1 M28 | Sord       | 0.025 |
| Tbc1d13     | 0.004035319 | 0.80957273 | 0.079 | 0.056 | 1 M28 | Tbc1d13    | 0.023 |
| Hps4        | 0.004075666 | 0.76742996 | 0.049 | 0.03  | 1 M28 | Hps4       | 0.019 |
| Gm43660     | 0.004099225 | 1.29059752 | 0.015 | 0.004 | 1 M28 | Gm43660    | 0.011 |
| Gm43848     | 0.004152411 | 0.72691956 | 0.025 | 0.011 | 1 M28 | Gm43848    | 0.014 |
| Gpr68       | 0.004210762 | 1.51746913 | 0.01  | 0.002 | 1 M28 | Gpr68      | 0.008 |
| Trappc8     | 0.004373054 | 0.82132598 | 0.071 | 0.048 | 1 M28 | Trappc8    | 0.023 |
| C5ar2       | 0.004466262 | 1.0171739  | 0.042 | 0.024 | 1 M28 | C5ar2      | 0.018 |
| Fut11       | 0.004552524 | 0.99366177 | 0.042 | 0.024 | 1 M28 | Fut11      | 0.018 |
| Gm33195     | 0.004588115 | 1.44018356 | 0.014 | 0.004 | 1 M28 | Gm33195    | 0.01  |
| Cdk5r1      | 0.004620432 | 1.64854411 | 0.016 | 0.005 | 1 M28 | Cdk5r1     | 0.011 |
| Gm15964     | 0.004628708 | 1.56902855 | 0.012 | 0.003 | 1 M28 | Gm15964    | 0.009 |
| 2610037D02R | 0.004704834 | 0.74134818 | 0.056 | 0.035 | 1 M28 | 2610037D02 | 0.021 |
| Spaca9      | 0.004718299 | 1.11882168 | 0.03  | 0.015 | 1 M28 | Spaca9     | 0.015 |
| Spice1      | 0.004769481 | 1.24463596 | 0.016 | 0.005 | 1 M28 | Spice1     | 0.011 |
| Itga1       | 0.004972914 | 1.34324775 | 0.022 | 0.009 | 1 M28 | Itga1      | 0.013 |
| Cd4         | 0.005133637 | 1.65495954 | 0.017 | 0.006 | 1 M28 | Cd4        | 0.011 |
| Smim24      | 0.005188486 | 0.87629913 | 0.028 | 0.014 | 1 M28 | Smim24     | 0.014 |
| Dgkh        | 0.005367999 | 0.86842312 | 0.055 | 0.035 | 1 M28 | Dgkh       | 0.02  |
| Gm19325     | 0.005402312 | 1.40054435 | 0.011 | 0.003 | 1 M28 | Gm19325    | 0.008 |
| Cpne8       | 0.005415864 | 1.291615   | 0.011 | 0.003 | 1 M28 | Cpne8      | 0.008 |
| Apba1       | 0.00541765  | 0.9306249  | 0.017 | 0.006 | 1 M28 | Apba1      | 0.011 |
| Htra1       | 0.005791433 | 0.79552129 | 0.047 | 0.029 | 1 M28 | Htra1      | 0.018 |
| Lck         | 0.005939579 | 1.30970042 | 0.017 | 0.006 | 1 M28 | Lck        | 0.011 |
| Cd1d1       | 0.006003488 | 1.14818537 | 0.017 | 0.006 | 1 M28 | Cd1d1      | 0.011 |
| Sept1       | 0.006098712 | 1.12116538 | 0.023 | 0.01  | 1 M28 | Sept1      | 0.013 |
| Pde3b       | 0.006108373 | 0.74099594 | 0.065 | 0.044 | 1 M28 | Pde3b      | 0.021 |
| Cramp1l     | 0.006339996 | 0.90610311 | 0.061 | 0.041 | 1 M28 | Cramp1l    | 0.02  |
| Cxcl12      | 0.006406094 | 1.0468181  | 0.01  | 0.002 | 1 M28 | Cxcl12     | 0.008 |
| Gm11423     | 0.006514886 | 1.45153702 | 0.012 | 0.003 | 1 M28 | Gm11423    | 0.009 |
| Zswim4      | 0.006691729 | 0.75378594 | 0.062 | 0.041 | 1 M28 | Zswim4     | 0.021 |
| Gatsl2      | 0.006784097 | 0.75937958 | 0.04  | 0.024 | 1 M28 | Gatsl2     | 0.016 |
| Dido1       | 0.006795052 | 0.76037347 | 0.066 | 0.046 | 1 M28 | Dido1      | 0.02  |
| Dbp         | 0.006906654 | 0.77496204 | 0.049 | 0.031 | 1 M28 | Dbp        | 0.018 |
| Trim30d     | 0.00706317  | 0.69995813 | 0.059 | 0.04  | 1 M28 | Trim30d    | 0.019 |
| Dusp14      | 0.007084776 | 1.30248954 | 0.011 | 0.003 | 1 M28 | Dusp14     | 0.008 |
| Rasgrp1     | 0.007094586 | 0.83825634 | 0.037 | 0.021 | 1 M28 | Rasgrp1    | 0.016 |
| Arfip1      | 0.007158959 | 0.74921634 | 0.046 | 0.029 | 1 M28 | Arfip1     | 0.017 |
| Col15a1     | 0.008008447 | 1.57816887 | 0.011 | 0.003 | 1 M28 | Col15a1    | 0.008 |
| Plekhg3     | 0.008094352 | 0.81465968 | 0.06  | 0.041 | 1 M28 | Plekhg3    | 0.019 |
| Cald1       | 0.008444241 | 1.41614811 | 0.02  | 0.008 | 1 M28 | Cald1      | 0.012 |
| Platr17     | 0.008477178 | 0.69652693 | 0.032 | 0.018 | 1 M28 | Platr17    | 0.014 |
| 6430531B16R | 0.008611054 | 0.92444996 | 0.012 | 0.003 | 1 M28 | 6430531B16 | 0.009 |
| Itk         | 0.008630952 | 1.16487699 | 0.012 | 0.003 | 1 M28 | Itk        | 0.009 |
| Prkag2      | 0.008683989 | 0.92806298 | 0.031 | 0.017 | 1 M28 | Prkag2     | 0.014 |
| Ank         | 0.008693751 | 0.88239619 | 0.034 | 0.019 | 1 M28 | Ank        | 0.015 |
| Cav1        | 0.008739688 | 1.00048723 | 0.012 | 0.003 | 1 M28 | Cav1       | 0.009 |
| Stat4       | 0.008904069 | 1.18656943 | 0.021 | 0.009 | 1 M28 | Stat4      | 0.012 |

|         |             |            |       |       |       |         |       |
|---------|-------------|------------|-------|-------|-------|---------|-------|
| Espl1   | 0.009390408 | 0.93220747 | 0.048 | 0.031 | 1 M28 | Espl1   | 0.017 |
| Gm15728 | 0.009419904 | 0.98573163 | 0.01  | 0.003 | 1 M28 | Gm15728 | 0.007 |
| Far1    | 0.009579368 | 0.73263271 | 0.099 | 0.076 | 1 M28 | Far1    | 0.023 |
| Cers5   | 0.00968376  | 0.79771324 | 0.086 | 0.064 | 1 M28 | Cers5   | 0.022 |
| Gimap6  | 0.009950045 | 1.16619816 | 0.013 | 0.004 | 1 M28 | Gimap6  | 0.009 |
