# Supplementary material
Source: PubMed Central journal article supplement (PMC8940682)
Supplement: NIHMS1773905-supplement-18.pdf [file NIHMS1773905-supplement-18.pdf]

**Supplemental Table 6. Gene Expression Fold Change in Melanocytes of control vs m28 treated tumors**

| gene_name   | p_val       | avg_log2FC | pct.1 | pct.2 | p_val_adj   | cluster | gene        | pct.diff |
|-------------|-------------|------------|-------|-------|-------------|---------|-------------|----------|
| Selenbp1    | 5.9056E-107 | 1.24329306 | 0.522 | 0.263 | 1.8339E-102 | CTRL    | Selenbp1    | 0.259    |
| Pafah1b3    | 2.94571E-89 | 0.76495942 | 0.609 | 0.374 | 9.14731E-85 | CTRL    | Pafah1b3    | 0.235    |
| Nxn         | 2.68325E-74 | 0.71132115 | 0.487 | 0.27  | 8.3323E-70  | CTRL    | Nxn         | 0.217    |
| Enah        | 1.73607E-68 | 1.30057112 | 0.245 | 0.085 | 5.39101E-64 | CTRL    | Enah        | 0.16     |
| Rab17       | 7.23176E-68 | 0.70573986 | 0.451 | 0.245 | 2.24568E-63 | CTRL    | Rab17       | 0.206    |
| Mgarp       | 9.63843E-66 | 0.81713572 | 0.523 | 0.32  | 2.99302E-61 | CTRL    | Mgarp       | 0.203    |
| Cited1      | 1.40314E-63 | 0.78879164 | 0.759 | 0.597 | 4.35716E-59 | CTRL    | Cited1      | 0.162    |
| Txnip       | 1.93342E-63 | 0.85264658 | 0.278 | 0.111 | 6.00385E-59 | CTRL    | Txnip       | 0.167    |
| Zfp292      | 1.64854E-61 | 0.70345179 | 0.578 | 0.369 | 5.11922E-57 | CTRL    | Zfp292      | 0.209    |
| AC160336.1  | 9.44174E-60 | 0.90674936 | 0.849 | 0.694 | 2.93194E-55 | CTRL    | AC160336.1  | 0.155    |
| Arrdc3      | 2.56984E-55 | 0.93643143 | 0.287 | 0.128 | 7.98011E-51 | CTRL    | Arrdc3      | 0.159    |
| Slc16a6     | 1.98042E-53 | 0.90564627 | 0.343 | 0.175 | 6.14981E-49 | CTRL    | Slc16a6     | 0.168    |
| Per1        | 6.30849E-47 | 0.76350075 | 0.422 | 0.249 | 1.95898E-42 | CTRL    | Per1        | 0.173    |
| Hist1h1e    | 6.81656E-42 | 0.97638164 | 0.327 | 0.185 | 2.11675E-37 | CTRL    | Hist1h1e    | 0.142    |
| Loxl2       | 4.22275E-40 | 0.79874401 | 0.231 | 0.107 | 1.31129E-35 | CTRL    | Loxl2       | 0.124    |
| Fam212a     | 5.17098E-39 | 0.69930579 | 0.377 | 0.226 | 1.60574E-34 | CTRL    | Fam212a     | 0.151    |
| Espn        | 2.20697E-35 | 0.72419089 | 0.522 | 0.381 | 6.85329E-31 | CTRL    | Espn        | 0.141    |
| Vldlr       | 3.61547E-32 | 1.16531965 | 0.118 | 0.04  | 1.12271E-27 | CTRL    | Vldlr       | 0.078    |
| Ndrp2       | 5.11956E-32 | 1.02369244 | 0.159 | 0.068 | 1.58978E-27 | CTRL    | Ndrp2       | 0.091    |
| Proser2     | 4.68927E-30 | 1.00937705 | 0.202 | 0.103 | 1.45616E-25 | CTRL    | Proser2     | 0.099    |
| H1fx        | 1.79588E-29 | 0.93696318 | 0.144 | 0.061 | 5.57675E-25 | CTRL    | H1fx        | 0.083    |
| Hist1h1d    | 6.21357E-29 | 1.18715874 | 0.147 | 0.064 | 1.9295E-24  | CTRL    | Hist1h1d    | 0.083    |
| Hist1h2ac   | 1.30817E-26 | 1.26441974 | 0.098 | 0.033 | 4.06226E-22 | CTRL    | Hist1h2ac   | 0.065    |
| Rsad2       | 5.17118E-26 | 0.7797012  | 0.337 | 0.218 | 1.60581E-21 | CTRL    | Rsad2       | 0.119    |
| Scrg1       | 7.60483E-24 | 0.85957741 | 0.108 | 0.043 | 2.36153E-19 | CTRL    | Scrg1       | 0.065    |
| Gm49359     | 1.30772E-22 | 0.87784073 | 0.157 | 0.08  | 4.06087E-18 | CTRL    | Gm49359     | 0.077    |
| 2610035D17R | 1.24761E-21 | 0.84863185 | 0.112 | 0.048 | 3.87421E-17 | CTRL    | 2610035D17R | 0.064    |
| Ralgps2     | 7.98523E-19 | 0.84648256 | 0.051 | 0.013 | 2.47965E-14 | CTRL    | Ralgps2     | 0.038    |
| Trp53cor1   | 2.21514E-18 | 0.85244564 | 0.124 | 0.061 | 6.87869E-14 | CTRL    | Trp53cor1   | 0.063    |
| Scarf1      | 2.9064E-18  | 0.96070018 | 0.085 | 0.034 | 9.02524E-14 | CTRL    | Scarf1      | 0.051    |
| B930036N10F | 4.14986E-18 | 0.75243502 | 0.139 | 0.073 | 1.28866E-13 | CTRL    | B930036N10F | 0.066    |
| Casp1       | 2.2652E-17  | 1.07404552 | 0.073 | 0.028 | 7.03412E-13 | CTRL    | Casp1       | 0.045    |
| Gm32591     | 1.13776E-16 | 0.90812258 | 0.115 | 0.058 | 3.53308E-12 | CTRL    | Gm32591     | 0.057    |
| Ifit3       | 5.03848E-16 | 0.79764289 | 0.132 | 0.072 | 1.5646E-11  | CTRL    | Ifit3       | 0.06     |
| Olfm2       | 5.67615E-16 | 0.74973802 | 0.083 | 0.036 | 1.76261E-11 | CTRL    | Olfm2       | 0.047    |
| Traf3ip2    | 6.97896E-16 | 0.73029774 | 0.134 | 0.074 | 2.16718E-11 | CTRL    | Traf3ip2    | 0.06     |
| Cox7a1      | 1.76104E-15 | 0.73438949 | 0.076 | 0.032 | 5.46855E-11 | CTRL    | Cox7a1      | 0.044    |
| Kifc1       | 6.41468E-15 | 0.75527646 | 0.119 | 0.064 | 1.99195E-10 | CTRL    | Kifc1       | 0.055    |
| Hist2h2aa1  | 1.80412E-14 | 0.75570289 | 0.112 | 0.059 | 5.60233E-10 | CTRL    | Hist2h2aa1  | 0.053    |
| Kit         | 2.31862E-14 | 0.96025324 | 0.036 | 0.008 | 7.20002E-10 | CTRL    | Kit         | 0.028    |
| Hist2h2be   | 2.98264E-14 | 1.16734667 | 0.079 | 0.036 | 9.262E-10   | CTRL    | Hist2h2be   | 0.043    |
| Hist1h3e    | 4.68348E-14 | 0.73602437 | 0.081 | 0.038 | 1.45436E-09 | CTRL    | Hist1h3e    | 0.043    |
| Itm2a       | 9.50603E-14 | 0.86131951 | 0.041 | 0.012 | 2.95191E-09 | CTRL    | Itm2a       | 0.029    |
| Cdhr4       | 9.95728E-14 | 0.75679261 | 0.075 | 0.034 | 3.09204E-09 | CTRL    | Cdhr4       | 0.041    |
| 4732440D04R | 1.49717E-13 | 0.71563743 | 0.136 | 0.079 | 4.64915E-09 | CTRL    | 4732440D04R | 0.057    |
| Arhgef39    | 4.23763E-13 | 0.96419153 | 0.085 | 0.042 | 1.31591E-08 | CTRL    | Arhgef39    | 0.043    |
| Rgma        | 5.34436E-13 | 0.73706623 | 0.076 | 0.036 | 1.65958E-08 | CTRL    | Rgma        | 0.04     |
| Nmrk1       | 5.42701E-13 | 0.79127121 | 0.093 | 0.048 | 1.68525E-08 | CTRL    | Nmrk1       | 0.045    |
| Cep72       | 5.65733E-13 | 0.75631754 | 0.069 | 0.03  | 1.75677E-08 | CTRL    | Cep72       | 0.039    |
| Amhr2       | 5.71306E-13 | 0.77713139 | 0.067 | 0.029 | 1.77408E-08 | CTRL    | Amhr2       | 0.038    |
| Kcnj13      | 6.24646E-13 | 1.21855828 | 0.062 | 0.026 | 1.93971E-08 | CTRL    | Kcnj13      | 0.036    |
| E130102H24R | 6.25322E-13 | 1.14392596 | 0.076 | 0.036 | 1.94181E-08 | CTRL    | E130102H24R | 0.04     |
| C730034F03R | 9.98982E-13 | 0.75816093 | 0.133 | 0.078 | 3.10214E-08 | CTRL    | C730034F03R | 0.055    |
| Olf1369-ps1 | 1.1308E-12  | 0.7400568  | 0.079 | 0.038 | 3.51147E-08 | CTRL    | Olf1369-ps1 | 0.041    |
| AU041133    | 1.51836E-12 | 1.07377611 | 0.069 | 0.031 | 4.71496E-08 | CTRL    | AU041133    | 0.038    |
| Car2        | 3.77014E-12 | 1.82299932 | 0.066 | 0.03  | 1.17074E-07 | CTRL    | Car2        | 0.036    |
| Zfp951      | 4.22543E-12 | 0.70715689 | 0.083 | 0.041 | 1.31212E-07 | CTRL    | Zfp951      | 0.042    |

|             |             |            |       |       |             |      |             |       |
|-------------|-------------|------------|-------|-------|-------------|------|-------------|-------|
| Hist1h2bj   | 6.22974E-12 | 0.82611938 | 0.065 | 0.029 | 1.93452E-07 | CTRL | Hist1h2bj   | 0.036 |
| Ctla2a      | 9.34728E-12 | 0.71879908 | 0.023 | 0.053 | 2.90261E-07 | CTRL | Ctla2a      | -0.03 |
| Zscan2      | 1.18599E-11 | 0.84522354 | 0.061 | 0.027 | 3.68286E-07 | CTRL | Zscan2      | 0.034 |
| Olfr889     | 1.24545E-11 | 0.81191769 | 0.11  | 0.063 | 3.86751E-07 | CTRL | Olfr889     | 0.047 |
| Phyhipl     | 3.3345E-11  | 0.7327827  | 0.071 | 0.035 | 1.03546E-06 | CTRL | Phyhipl     | 0.036 |
| Hist1h4c    | 8.28897E-11 | 0.75156669 | 0.034 | 0.011 | 2.57397E-06 | CTRL | Hist1h4c    | 0.023 |
| Abca8b      | 9.86263E-11 | 0.96816899 | 0.057 | 0.025 | 3.06264E-06 | CTRL | Abca8b      | 0.032 |
| Pabpc4l     | 9.91306E-11 | 0.78809096 | 0.047 | 0.019 | 3.0783E-06  | CTRL | Pabpc4l     | 0.028 |
| Hist1h2be   | 1.40354E-10 | 0.85382009 | 0.051 | 0.021 | 4.35841E-06 | CTRL | Hist1h2be   | 0.03  |
| Spink8      | 6.58456E-10 | 0.75723866 | 0.035 | 0.012 | 2.0447E-05  | CTRL | Spink8      | 0.023 |
| Itgb4       | 6.94735E-10 | 0.74927797 | 0.05  | 0.022 | 2.15736E-05 | CTRL | Itgb4       | 0.028 |
| Mrap        | 9.4143E-10  | 0.75910692 | 0.03  | 0.009 | 2.92342E-05 | CTRL | Mrap        | 0.021 |
| Cry2        | 1.14815E-09 | 0.70443584 | 0.137 | 0.088 | 3.56535E-05 | CTRL | Cry2        | 0.049 |
| B230312C02R | 3.58965E-09 | 0.85522951 | 0.039 | 0.015 | 0.000111469 | CTRL | B230312C02R | 0.024 |
| Dqx1        | 4.12593E-09 | 0.72614065 | 0.082 | 0.047 | 0.000128123 | CTRL | Dqx1        | 0.035 |
| Unc13a      | 4.49678E-09 | 0.69451342 | 0.084 | 0.048 | 0.000139638 | CTRL | Unc13a      | 0.036 |
| Cck         | 7.38878E-09 | 2.64761585 | 0.029 | 0.009 | 0.000229444 | CTRL | Cck         | 0.02  |
| Apol11b     | 8.32252E-09 | 1.69110617 | 0.023 | 0.006 | 0.000258439 | CTRL | Apol11b     | 0.017 |
| Mpped2      | 1.01239E-08 | 0.92246368 | 0.056 | 0.028 | 0.000314378 | CTRL | Mpped2      | 0.028 |
| Slc38a9     | 1.5176E-08  | 0.75824207 | 0.176 | 0.123 | 0.000471262 | CTRL | Slc38a9     | 0.053 |
| Cda         | 1.62379E-08 | 0.72852958 | 0.074 | 0.042 | 0.000504234 | CTRL | Cda         | 0.032 |
| Gypa        | 2.46835E-08 | 2.0589583  | 0.028 | 0.009 | 0.000766497 | CTRL | Gypa        | 0.019 |
| Lepr        | 7.51373E-08 | 0.98082885 | 0.047 | 0.023 | 0.002333237 | CTRL | Lepr        | 0.024 |
| Gm45895     | 7.80158E-08 | 1.01091922 | 0.033 | 0.013 | 0.002422626 | CTRL | Gm45895     | 0.02  |
| Ifit3b      | 7.93E-08    | 0.83027846 | 0.039 | 0.018 | 0.002462502 | CTRL | Ifit3b      | 0.021 |
| Gm41335     | 1.02914E-07 | 0.74021117 | 0.045 | 0.021 | 0.003195796 | CTRL | Gm41335     | 0.024 |
| Ptcra       | 1.0521E-07  | 0.78691299 | 0.105 | 0.069 | 0.003267077 | CTRL | Ptcra       | 0.036 |
| Ndufa4l2    | 1.38113E-07 | 1.07335887 | 0.059 | 0.032 | 0.004288817 | CTRL | Ndufa4l2    | 0.027 |
| Tspan33     | 1.41748E-07 | 1.6130328  | 0.048 | 0.024 | 0.004401709 | CTRL | Tspan33     | 0.024 |
| Map3k13     | 2.51269E-07 | 0.74739162 | 0.041 | 0.019 | 0.007802663 | CTRL | Map3k13     | 0.022 |
| Slc4a1      | 2.95539E-07 | 2.20804757 | 0.021 | 0.006 | 0.009177369 | CTRL | Slc4a1      | 0.015 |
| Lin28b      | 3.36279E-07 | 0.75657064 | 0.066 | 0.038 | 0.010442466 | CTRL | Lin28b      | 0.028 |
| Gm45184     | 3.78334E-07 | 0.87793159 | 0.033 | 0.014 | 0.011748391 | CTRL | Gm45184     | 0.019 |
| Trim10      | 5.4684E-07  | 0.86331569 | 0.055 | 0.03  | 0.016981011 | CTRL | Trim10      | 0.025 |
| Gm32051     | 9.01698E-07 | 0.70276901 | 0.053 | 0.029 | 0.028000436 | CTRL | Gm32051     | 0.024 |
| Tspo2       | 1.13219E-06 | 1.57512969 | 0.02  | 0.007 | 0.035158045 | CTRL | Tspo2       | 0.013 |
| Apol7d      | 2.71794E-06 | 0.80484937 | 0.035 | 0.017 | 0.08440025  | CTRL | Apol7d      | 0.018 |
| Gm39459     | 3.4175E-06  | 1.02886412 | 0.026 | 0.011 | 0.106123606 | CTRL | Gm39459     | 0.015 |
| Zfp438      | 4.05948E-06 | 0.88105401 | 0.041 | 0.021 | 0.12605909  | CTRL | Zfp438      | 0.02  |
| Olfr56      | 4.92536E-06 | 0.71487838 | 0.036 | 0.018 | 0.152947334 | CTRL | Olfr56      | 0.018 |
| Cox6b2      | 5.37589E-06 | 1.15953486 | 0.017 | 0.005 | 0.166937504 | CTRL | Cox6b2      | 0.012 |
| Gm26699     | 7.81092E-06 | 0.89222706 | 0.083 | 0.055 | 0.242552501 | CTRL | Gm26699     | 0.028 |
| Lrp2        | 1.10818E-05 | 0.81829857 | 0.017 | 0.006 | 0.344123641 | CTRL | Lrp2        | 0.011 |
| Efna1       | 2.06846E-05 | 0.70477083 | 0.019 | 0.007 | 0.642318179 | CTRL | Efna1       | 0.012 |
| Pde7b       | 2.09631E-05 | 0.89959902 | 0.017 | 0.006 | 0.650967949 | CTRL | Pde7b       | 0.011 |
| Notch4      | 2.17323E-05 | 0.9067621  | 0.026 | 0.012 | 0.674853991 | CTRL | Notch4      | 0.014 |
| A230005M16  | 2.42201E-05 | 0.7905902  | 0.011 | 0.003 | 0.7521054   | CTRL | A230005M16  | 0.008 |
| Syn1        | 2.53411E-05 | 0.73263615 | 0.072 | 0.047 | 0.786917205 | CTRL | Syn1        | 0.025 |
| Mterf1a     | 7.44885E-05 | 0.77991314 | 0.045 | 0.027 | 1           | CTRL | Mterf1a     | 0.018 |
| Ldhd        | 7.58012E-05 | 0.96957219 | 0.014 | 0.005 | 1           | CTRL | Ldhd        | 0.009 |
| Gm15880     | 0.000117005 | 0.72124016 | 0.024 | 0.011 | 1           | CTRL | Gm15880     | 0.013 |
| Zfp773      | 0.000157996 | 0.76975787 | 0.035 | 0.02  | 1           | CTRL | Zfp773      | 0.015 |
| 3110045C21R | 0.000301552 | 0.74359736 | 0.037 | 0.022 | 1           | CTRL | 3110045C21R | 0.015 |
| Gm3550      | 0.004503994 | 0.93135617 | 0.013 | 0.006 | 1           | CTRL | Gm3550      | 0.007 |
| Lyz2        | 1.1084E-255 | 2.4961453  | 0.497 | 0.145 | 3.4418E-251 | M28  | Lyz2        | 0.352 |
| Cxcl2       | 5.4773E-153 | 1.8883983  | 0.412 | 0.154 | 1.7009E-148 | M28  | Cxcl2       | 0.258 |
| Il1b        | 6.20107E-96 | 2.49234312 | 0.239 | 0.07  | 1.92562E-91 | M28  | Il1b        | 0.169 |
| Cd14        | 3.78563E-91 | 2.4290969  | 0.192 | 0.044 | 1.17555E-86 | M28  | Cd14        | 0.148 |
| S100a6      | 1.49659E-81 | 1.28139227 | 0.577 | 0.408 | 4.64735E-77 | M28  | S100a6      | 0.169 |

|          |             |            |       |       |                 |          |       |
|----------|-------------|------------|-------|-------|-----------------|----------|-------|
| Col3a1   | 1.07359E-76 | 2.8755818  | 0.121 | 0.015 | 3.33381E-72 M28 | Col3a1   | 0.106 |
| Saa3     | 1.80277E-72 | 3.44851583 | 0.158 | 0.037 | 5.59815E-68 M28 | Saa3     | 0.121 |
| Ctss     | 4.85239E-71 | 1.69459177 | 0.25  | 0.097 | 1.50681E-66 M28 | Ctss     | 0.153 |
| Cd52     | 1.06255E-68 | 2.09158468 | 0.197 | 0.063 | 3.29953E-64 M28 | Cd52     | 0.134 |
| Wfdc17   | 2.10287E-67 | 2.29330569 | 0.182 | 0.055 | 6.53006E-63 M28 | Wfdc17   | 0.127 |
| Nrp2     | 2.63192E-67 | 0.78527792 | 0.534 | 0.355 | 8.17292E-63 M28 | Nrp2     | 0.179 |
| Tyropb   | 9.85517E-64 | 2.00284268 | 0.206 | 0.074 | 3.06033E-59 M28 | Tyropb   | 0.132 |
| Tmsb4x   | 6.97491E-61 | 0.80877815 | 0.893 | 0.882 | 2.16592E-56 M28 | Tmsb4x   | 0.011 |
| Col1a1   | 7.48091E-60 | 2.26766322 | 0.103 | 0.016 | 2.32305E-55 M28 | Col1a1   | 0.087 |
| Fcer1g   | 2.4923E-59  | 1.79750664 | 0.328 | 0.181 | 7.73934E-55 M28 | Fcer1g   | 0.147 |
| Col1a2   | 6.81672E-59 | 2.4964028  | 0.1   | 0.015 | 2.1168E-54 M28  | Col1a2   | 0.085 |
| Srgn     | 1.00687E-58 | 1.74733227 | 0.221 | 0.089 | 3.12663E-54 M28 | Srgn     | 0.132 |
| Carmil2  | 5.01088E-56 | 1.66579721 | 0.147 | 0.042 | 1.55603E-51 M28 | Carmil2  | 0.105 |
| C1qb     | 1.18701E-49 | 1.51435597 | 0.251 | 0.125 | 3.68603E-45 M28 | C1qb     | 0.126 |
| Slpi     | 2.447E-46   | 2.15281213 | 0.139 | 0.046 | 7.59866E-42 M28 | Slpi     | 0.093 |
| Ccl8     | 2.82931E-46 | 2.13545513 | 0.152 | 0.053 | 8.78586E-42 M28 | Ccl8     | 0.099 |
| Ly6e     | 4.80007E-46 | 2.04365559 | 0.117 | 0.032 | 1.49057E-41 M28 | Ly6e     | 0.085 |
| Mitf     | 5.8321E-46  | 0.8312548  | 0.727 | 0.767 | 1.81104E-41 M28 | Mitf     | -0.04 |
| Nr4a2    | 1.05879E-45 | 0.96833646 | 0.388 | 0.255 | 3.28787E-41 M28 | Nr4a2    | 0.133 |
| Laptm5   | 4.4755E-44  | 2.06453635 | 0.139 | 0.047 | 1.38978E-39 M28 | Laptm5   | 0.092 |
| Nr4a3    | 7.99593E-43 | 0.99087783 | 0.557 | 0.488 | 2.48298E-38 M28 | Nr4a3    | 0.069 |
| C1qa     | 3.22974E-41 | 1.45704696 | 0.209 | 0.1   | 1.00293E-36 M28 | C1qa     | 0.109 |
| Ahnak    | 4.92916E-41 | 1.08527195 | 0.355 | 0.226 | 1.53065E-36 M28 | Ahnak    | 0.129 |
| Ptgs2    | 2.1859E-40  | 2.30071403 | 0.085 | 0.018 | 6.78788E-36 M28 | Ptgs2    | 0.067 |
| Cd74     | 6.86375E-39 | 0.84046677 | 0.466 | 0.324 | 2.1314E-34 M28  | Cd74     | 0.142 |
| Ptprc    | 1.59316E-38 | 2.16518563 | 0.087 | 0.02  | 4.94724E-34 M28 | Ptprc    | 0.067 |
| Pf4      | 3.61147E-38 | 0.71806875 | 0.125 | 0.043 | 1.12147E-33 M28 | Pf4      | 0.082 |
| Lsmem1   | 3.79411E-37 | 1.30004278 | 0.189 | 0.09  | 1.17819E-32 M28 | Lsmem1   | 0.099 |
| Thbs1    | 1.40518E-35 | 1.55693671 | 0.141 | 0.056 | 4.36351E-31 M28 | Thbs1    | 0.085 |
| Lcn2     | 9.01676E-34 | 2.81778788 | 0.043 | 0.002 | 2.79997E-29 M28 | Lcn2     | 0.041 |
| Mpeg1    | 1.207E-33   | 1.38684046 | 0.089 | 0.025 | 3.7481E-29 M28  | Mpeg1    | 0.064 |
| Plek     | 3.19519E-33 | 1.79218164 | 0.091 | 0.026 | 9.92201E-29 M28 | Plek     | 0.065 |
| Coro1a   | 3.94431E-33 | 1.70876351 | 0.137 | 0.057 | 1.22483E-28 M28 | Coro1a   | 0.08  |
| Slfn2    | 1.6291E-32  | 1.67543103 | 0.112 | 0.04  | 5.05884E-28 M28 | Slfn2    | 0.072 |
| Cybb     | 9.81622E-32 | 2.22112015 | 0.08  | 0.021 | 3.04823E-27 M28 | Cybb     | 0.059 |
| Acod1    | 5.43362E-31 | 2.25262979 | 0.048 | 0.006 | 1.6873E-26 M28  | Acod1    | 0.042 |
| AW112010 | 2.16744E-30 | 1.92613324 | 0.13  | 0.055 | 6.73056E-26 M28 | AW112010 | 0.075 |
| Aif1     | 9.30857E-30 | 1.81235929 | 0.093 | 0.031 | 2.89059E-25 M28 | Aif1     | 0.062 |
| Rac2     | 1.17566E-29 | 1.87553519 | 0.096 | 0.032 | 3.65077E-25 M28 | Rac2     | 0.064 |
| Ccl5     | 9.51274E-29 | 1.38070334 | 0.177 | 0.09  | 2.95399E-24 M28 | Ccl5     | 0.087 |
| Il1rn    | 1.90574E-28 | 1.7488516  | 0.082 | 0.025 | 5.91791E-24 M28 | Il1rn    | 0.057 |
| Plac8    | 2.77134E-28 | 1.82104691 | 0.083 | 0.026 | 8.60585E-24 M28 | Plac8    | 0.057 |
| Ccr12    | 4.94441E-28 | 1.51718933 | 0.117 | 0.048 | 1.53539E-23 M28 | Ccr12    | 0.069 |
| Clec4e   | 5.37981E-28 | 1.66637258 | 0.075 | 0.022 | 1.67059E-23 M28 | Clec4e   | 0.053 |
| Bcl2a1b  | 1.05493E-27 | 1.52544619 | 0.101 | 0.037 | 3.27586E-23 M28 | Bcl2a1b  | 0.064 |
| Tgfb1    | 2.63802E-26 | 1.75131148 | 0.081 | 0.026 | 8.19183E-22 M28 | Tgfb1    | 0.055 |
| Ms4a6b   | 3.99112E-26 | 1.95477997 | 0.063 | 0.016 | 1.23936E-21 M28 | Ms4a6b   | 0.047 |
| Nlrp3    | 4.14893E-26 | 1.9942197  | 0.06  | 0.015 | 1.28837E-21 M28 | Nlrp3    | 0.045 |
| Cytip    | 2.01008E-25 | 1.86640692 | 0.07  | 0.021 | 6.24191E-21 M28 | Cytip    | 0.049 |
| Cd53     | 2.02355E-25 | 1.69826636 | 0.076 | 0.024 | 6.28374E-21 M28 | Cd53     | 0.052 |
| Ms4a7    | 3.85373E-25 | 1.81758951 | 0.081 | 0.027 | 1.1967E-20 M28  | Ms4a7    | 0.054 |
| Pltp     | 4.75913E-25 | 1.57061572 | 0.093 | 0.035 | 1.47785E-20 M28 | Pltp     | 0.058 |
| Ly6a     | 1.03531E-24 | 1.86040193 | 0.07  | 0.021 | 3.21494E-20 M28 | Ly6a     | 0.049 |
| C1qc     | 1.09858E-24 | 1.1865962  | 0.148 | 0.075 | 3.41141E-20 M28 | C1qc     | 0.073 |
| Alox5ap  | 1.62026E-24 | 1.50666338 | 0.086 | 0.031 | 5.0314E-20 M28  | Alox5ap  | 0.055 |
| Gpr132   | 5.30025E-24 | 1.34057177 | 0.046 | 0.008 | 1.64589E-19 M28 | Gpr132   | 0.038 |
| S100a8   | 5.33529E-24 | 1.69634675 | 0.079 | 0.027 | 1.65677E-19 M28 | S100a8   | 0.052 |
| Ccl3     | 8.28862E-24 | 1.65041746 | 0.118 | 0.054 | 2.57386E-19 M28 | Ccl3     | 0.064 |
| Nr4a1    | 8.92003E-24 | 0.75754636 | 0.593 | 0.57  | 2.76994E-19 M28 | Nr4a1    | 0.023 |

|          |             |            |       |       |                 |          |       |
|----------|-------------|------------|-------|-------|-----------------|----------|-------|
| Gmfg     | 1.35477E-23 | 1.88979588 | 0.076 | 0.026 | 4.20697E-19 M28 | Gmfg     | 0.05  |
| Xist     | 3.93287E-23 | 1.22699709 | 0.098 | 0.04  | 1.22127E-18 M28 | Xist     | 0.058 |
| S100a9   | 4.49999E-23 | 2.25701969 | 0.074 | 0.025 | 1.39738E-18 M28 | S100a9   | 0.049 |
| Ccl2     | 1.00548E-22 | 1.83322743 | 0.124 | 0.059 | 3.12232E-18 M28 | Ccl2     | 0.065 |
| Tagln2   | 1.15733E-22 | 0.97018915 | 0.29  | 0.202 | 3.59385E-18 M28 | Tagln2   | 0.088 |
| Ccl4     | 1.4559E-22  | 1.18051792 | 0.169 | 0.096 | 4.52099E-18 M28 | Ccl4     | 0.073 |
| Ccl6     | 1.6203E-22  | 1.62581784 | 0.083 | 0.031 | 5.03153E-18 M28 | Ccl6     | 0.052 |
| H2-Q7    | 2.89361E-22 | 1.70516034 | 0.081 | 0.03  | 8.98552E-18 M28 | H2-Q7    | 0.051 |
| Gngt2    | 3.02876E-22 | 1.42267816 | 0.067 | 0.021 | 9.40521E-18 M28 | Gngt2    | 0.046 |
| Clec4a1  | 4.97161E-22 | 1.64533324 | 0.055 | 0.015 | 1.54383E-17 M28 | Clec4a1  | 0.04  |
| Ms4a6c   | 1.28654E-21 | 1.34405354 | 0.069 | 0.023 | 3.9951E-17 M28  | Ms4a6c   | 0.046 |
| Neurl3   | 1.64743E-21 | 1.82936213 | 0.045 | 0.01  | 5.11577E-17 M28 | Neurl3   | 0.035 |
| Pla2g7   | 2.74923E-21 | 1.41190765 | 0.056 | 0.016 | 8.53719E-17 M28 | Pla2g7   | 0.04  |
| Nppb     | 3.71917E-21 | 1.03625355 | 0.311 | 0.227 | 1.15491E-16 M28 | Nppb     | 0.084 |
| Clec4d   | 3.90307E-21 | 1.95772366 | 0.062 | 0.019 | 1.21202E-16 M28 | Clec4d   | 0.043 |
| Trem2    | 4.29358E-21 | 1.60121328 | 0.08  | 0.031 | 1.33328E-16 M28 | Trem2    | 0.049 |
| Ifitm1   | 6.42864E-21 | 2.44296088 | 0.041 | 0.008 | 1.99628E-16 M28 | Ifitm1   | 0.033 |
| Bgn      | 4.802E-20   | 1.01440612 | 0.052 | 0.014 | 1.49117E-15 M28 | Bgn      | 0.038 |
| Adcy7    | 5.11516E-20 | 0.80012749 | 0.406 | 0.339 | 1.58841E-15 M28 | Adcy7    | 0.067 |
| Emp1     | 6.3447E-20  | 1.15283263 | 0.262 | 0.186 | 1.97022E-15 M28 | Emp1     | 0.076 |
| Adgre1   | 8.69263E-20 | 1.7414441  | 0.051 | 0.014 | 2.69932E-15 M28 | Adgre1   | 0.037 |
| Ccl7     | 2.18953E-19 | 1.71578298 | 0.09  | 0.039 | 6.79915E-15 M28 | Ccl7     | 0.051 |
| Ptafr    | 3.30945E-19 | 1.44227226 | 0.04  | 0.009 | 1.02768E-14 M28 | Ptafr    | 0.031 |
| Tnfrsf1b | 3.81892E-19 | 1.56483559 | 0.048 | 0.013 | 1.18589E-14 M28 | Tnfrsf1b | 0.035 |
| Cxcl9    | 4.55126E-19 | 1.0982228  | 0.072 | 0.027 | 1.4133E-14 M28  | Cxcl9    | 0.045 |
| Klf4     | 5.44228E-19 | 1.00464069 | 0.496 | 0.449 | 1.68999E-14 M28 | Klf4     | 0.047 |
| Tgm2     | 1.41818E-18 | 1.53968134 | 0.067 | 0.025 | 4.40388E-14 M28 | Tgm2     | 0.042 |
| Cxcl1    | 1.67701E-18 | 1.42271291 | 0.054 | 0.017 | 5.20763E-14 M28 | Cxcl1    | 0.037 |
| Cd109    | 1.97593E-18 | 0.69566861 | 0.536 | 0.508 | 6.13585E-14 M28 | Cd109    | 0.028 |
| Ahnak2   | 4.18371E-18 | 0.71887354 | 0.437 | 0.375 | 1.29917E-13 M28 | Ahnak2   | 0.062 |
| Icam1    | 5.25731E-18 | 1.82704998 | 0.063 | 0.023 | 1.63255E-13 M28 | Icam1    | 0.04  |
| Samsn1   | 7.74651E-18 | 1.51442526 | 0.046 | 0.013 | 2.40552E-13 M28 | Samsn1   | 0.033 |
| Fcgr3    | 8.78711E-18 | 1.17619946 | 0.073 | 0.029 | 2.72866E-13 M28 | Fcgr3    | 0.044 |
| Traf1    | 9.95868E-18 | 1.55335959 | 0.048 | 0.014 | 3.09247E-13 M28 | Traf1    | 0.034 |
| H2-Ab1   | 9.95958E-18 | 1.15932468 | 0.257 | 0.181 | 3.09275E-13 M28 | H2-Ab1   | 0.076 |
| Lsp1     | 1.1886E-17  | 1.34196353 | 0.064 | 0.024 | 3.69095E-13 M28 | Lsp1     | 0.04  |
| Cd300c2  | 1.37615E-17 | 1.79961217 | 0.059 | 0.021 | 4.27337E-13 M28 | Cd300c2  | 0.038 |
| Pmepa1   | 1.86376E-17 | 1.34620073 | 0.207 | 0.14  | 5.78754E-13 M28 | Pmepa1   | 0.067 |
| Wisp1    | 3.804E-17   | 1.48321933 | 0.047 | 0.014 | 1.18125E-12 M28 | Wisp1    | 0.033 |
| Spp1     | 3.83811E-17 | 1.3778664  | 0.171 | 0.105 | 1.19185E-12 M28 | Spp1     | 0.066 |
| Csf1r    | 7.14799E-17 | 1.55032098 | 0.054 | 0.018 | 2.21966E-12 M28 | Csf1r    | 0.036 |
| S100a4   | 1.61311E-16 | 1.21442261 | 0.208 | 0.143 | 5.00919E-12 M28 | S100a4   | 0.065 |
| Spi1     | 2.10878E-16 | 1.18244446 | 0.064 | 0.025 | 6.54838E-12 M28 | Spi1     | 0.039 |
| Snx20    | 2.89798E-16 | 1.48436853 | 0.047 | 0.014 | 8.99909E-12 M28 | Snx20    | 0.033 |
| Lhfp12   | 3.41435E-16 | 0.86845738 | 0.158 | 0.098 | 1.06026E-11 M28 | Lhfp12   | 0.06  |
| Pld4     | 3.57162E-16 | 1.56581843 | 0.06  | 0.023 | 1.10909E-11 M28 | Pld4     | 0.037 |
| Plaur    | 3.58781E-16 | 1.37120224 | 0.141 | 0.084 | 1.11412E-11 M28 | Plaur    | 0.057 |
| Itgam    | 3.62378E-16 | 1.33569654 | 0.046 | 0.014 | 1.12529E-11 M28 | Itgam    | 0.032 |
| Il1a     | 4.27419E-16 | 1.34612069 | 0.036 | 0.009 | 1.32727E-11 M28 | Il1a     | 0.027 |
| C3       | 4.87205E-16 | 1.70388313 | 0.037 | 0.009 | 1.51292E-11 M28 | C3       | 0.028 |
| Nfkbid   | 5.65628E-16 | 1.01775394 | 0.038 | 0.01  | 1.75644E-11 M28 | Nfkbid   | 0.028 |
| Lilr4b   | 6.61117E-16 | 1.37295359 | 0.069 | 0.029 | 2.05297E-11 M28 | Lilr4b   | 0.04  |
| Itgb7    | 1.09883E-15 | 1.67477269 | 0.029 | 0.005 | 3.41219E-11 M28 | Itgb7    | 0.024 |
| Cyth4    | 1.12548E-15 | 1.23092114 | 0.044 | 0.013 | 3.49495E-11 M28 | Cyth4    | 0.031 |
| Plbd1    | 1.38448E-15 | 1.3690329  | 0.05  | 0.017 | 4.29922E-11 M28 | Plbd1    | 0.033 |
| Gzma     | 1.60557E-15 | 2.21014999 | 0.023 | 0.003 | 4.98578E-11 M28 | Gzma     | 0.02  |
| Igkc     | 1.65763E-15 | 1.35259996 | 0.026 | 0.004 | 5.14745E-11 M28 | Igkc     | 0.022 |
| Csf2rb   | 2.09953E-15 | 1.33291106 | 0.041 | 0.012 | 6.51968E-11 M28 | Csf2rb   | 0.029 |
| Cd83     | 2.15161E-15 | 1.52346985 | 0.075 | 0.034 | 6.6814E-11 M28  | Cd83     | 0.041 |

|          |             |            |       |       |             |     |          |        |
|----------|-------------|------------|-------|-------|-------------|-----|----------|--------|
| Lcp2     | 2.6518E-15  | 1.5695776  | 0.035 | 0.009 | 8.23464E-11 | M28 | Lcp2     | 0.026  |
| Arl4c    | 2.8064E-15  | 1.62717018 | 0.031 | 0.007 | 8.71472E-11 | M28 | Arl4c    | 0.024  |
| Dcn      | 3.34165E-15 | 1.67807389 | 0.027 | 0.005 | 1.03768E-10 | M28 | Dcn      | 0.022  |
| Wfdc21   | 5.58979E-15 | 2.11463361 | 0.019 | 0.002 | 1.7358E-10  | M28 | Wfdc21   | 0.017  |
| Ckm      | 1.00617E-14 | 1.71092012 | 0.042 | 0.089 | 3.12447E-10 | M28 | Ckm      | -0.047 |
| Hcst     | 1.27886E-14 | 1.17189582 | 0.039 | 0.011 | 3.97124E-10 | M28 | Hcst     | 0.028  |
| Osm      | 1.49272E-14 | 1.51238012 | 0.042 | 0.013 | 4.63533E-10 | M28 | Osm      | 0.029  |
| Cxcr4    | 1.6186E-14  | 1.43667283 | 0.041 | 0.012 | 5.02623E-10 | M28 | Cxcr4    | 0.029  |
| Clec4a3  | 1.66046E-14 | 1.34531147 | 0.037 | 0.01  | 5.15623E-10 | M28 | Clec4a3  | 0.027  |
| Ifi27l2a | 2.54854E-14 | 1.71062234 | 0.089 | 0.046 | 7.91397E-10 | M28 | Ifi27l2a | 0.043  |
| Cxcl16   | 2.81501E-14 | 1.26787847 | 0.058 | 0.023 | 8.74146E-10 | M28 | Cxcl16   | 0.035  |
| Ltbp4    | 3.10935E-14 | 1.46298002 | 0.046 | 0.016 | 9.65547E-10 | M28 | Ltbp4    | 0.03   |
| Myo1f    | 3.3088E-14  | 1.3021125  | 0.029 | 0.006 | 1.02748E-09 | M28 | Myo1f    | 0.023  |
| Egfl8    | 3.49865E-14 | 1.07943221 | 0.07  | 0.032 | 1.08644E-09 | M28 | Egfl8    | 0.038  |
| Selplg   | 4.01626E-14 | 1.4157026  | 0.087 | 0.045 | 1.24717E-09 | M28 | Selplg   | 0.042  |
| Dock2    | 4.78329E-14 | 1.34415751 | 0.039 | 0.012 | 1.48536E-09 | M28 | Dock2    | 0.027  |
| Entpd2   | 5.04438E-14 | 1.55010204 | 0.052 | 0.02  | 1.56643E-09 | M28 | Entpd2   | 0.032  |
| Fcgr1    | 7.10537E-14 | 1.17346275 | 0.043 | 0.014 | 2.20643E-09 | M28 | Fcgr1    | 0.029  |
| Cd68     | 7.17614E-14 | 0.81621526 | 0.214 | 0.153 | 2.22841E-09 | M28 | Cd68     | 0.061  |
| Ets2     | 8.36308E-14 | 1.34350531 | 0.161 | 0.107 | 2.59699E-09 | M28 | Ets2     | 0.054  |
| Cyp4f18  | 1.04182E-13 | 1.35465401 | 0.043 | 0.014 | 3.23516E-09 | M28 | Cyp4f18  | 0.029  |
| Ly86     | 1.12524E-13 | 1.04880069 | 0.042 | 0.014 | 3.49421E-09 | M28 | Ly86     | 0.028  |
| Ly6c2    | 1.40345E-13 | 1.61116903 | 0.024 | 0.004 | 4.35813E-09 | M28 | Ly6c2    | 0.02   |
| Tlr2     | 2.00734E-13 | 1.56284285 | 0.061 | 0.027 | 6.23338E-09 | M28 | Tlr2     | 0.034  |
| Fn1      | 3.211E-13   | 0.71540649 | 0.496 | 0.451 | 9.97112E-09 | M28 | Fn1      | 0.045  |
| Pid1     | 5.21475E-13 | 0.93432436 | 0.035 | 0.01  | 1.61934E-08 | M28 | Pid1     | 0.025  |
| Ccr2     | 6.20381E-13 | 1.51128314 | 0.028 | 0.007 | 1.92647E-08 | M28 | Ccr2     | 0.021  |
| Clec12a  | 6.47379E-13 | 1.32857091 | 0.043 | 0.015 | 2.0103E-08  | M28 | Clec12a  | 0.028  |
| Csf3r    | 8.31765E-13 | 1.46373963 | 0.016 | 0.001 | 2.58288E-08 | M28 | Csf3r    | 0.015  |
| Fam107b  | 9.60236E-13 | 1.22252508 | 0.039 | 0.013 | 2.98182E-08 | M28 | Fam107b  | 0.026  |
| Hbb-bs   | 1.40368E-12 | 0.91195271 | 0.952 | 0.977 | 4.35884E-08 | M28 | Hbb-bs   | -0.025 |
| Slc15a3  | 1.43581E-12 | 1.48013802 | 0.045 | 0.017 | 4.45863E-08 | M28 | Slc15a3  | 0.028  |
| Cxcl12   | 1.45917E-12 | 1.44470867 | 0.023 | 0.004 | 4.53117E-08 | M28 | Cxcl12   | 0.019  |
| Gimap3   | 1.62718E-12 | 1.55810606 | 0.021 | 0.003 | 5.05289E-08 | M28 | Gimap3   | 0.018  |
| Ncf4     | 1.72782E-12 | 1.21340529 | 0.038 | 0.013 | 5.3654E-08  | M28 | Ncf4     | 0.025  |
| Ms4a4b   | 2.04831E-12 | 1.42905265 | 0.031 | 0.009 | 6.36061E-08 | M28 | Ms4a4b   | 0.022  |
| Ccr5     | 2.16014E-12 | 1.09804986 | 0.037 | 0.012 | 6.70787E-08 | M28 | Ccr5     | 0.025  |
| Ccl9     | 2.65984E-12 | 1.29034108 | 0.056 | 0.025 | 8.2596E-08  | M28 | Ccl9     | 0.031  |
| Il10ra   | 3.04696E-12 | 1.43614402 | 0.03  | 0.008 | 9.46171E-08 | M28 | Il10ra   | 0.022  |
| C5ar1    | 3.14711E-12 | 1.28222154 | 0.038 | 0.013 | 9.77273E-08 | M28 | C5ar1    | 0.025  |
| Klrd1    | 3.77201E-12 | 1.34476826 | 0.027 | 0.007 | 1.17132E-07 | M28 | Klrd1    | 0.02   |
| Ms4a6d   | 3.81145E-12 | 1.39987582 | 0.053 | 0.023 | 1.18357E-07 | M28 | Ms4a6d   | 0.03   |
| Ccr1     | 4.87722E-12 | 1.76490147 | 0.032 | 0.009 | 1.51452E-07 | M28 | Ccr1     | 0.023  |
| Clec4n   | 5.16901E-12 | 1.4273404  | 0.032 | 0.009 | 1.60513E-07 | M28 | Clec4n   | 0.023  |
| Gzmb     | 6.88147E-12 | 2.12649117 | 0.027 | 0.007 | 2.1369E-07  | M28 | Gzmb     | 0.02   |
| Rftn1    | 9.92067E-12 | 1.20256614 | 0.02  | 0.003 | 3.08066E-07 | M28 | Rftn1    | 0.017  |
| Cfp      | 1.03026E-11 | 1.47423859 | 0.063 | 0.03  | 3.19926E-07 | M28 | Cfp      | 0.033  |
| Adamts14 | 1.21649E-11 | 1.36942263 | 0.091 | 0.051 | 3.77757E-07 | M28 | Adamts14 | 0.04   |
| Emilin2  | 1.43258E-11 | 1.18693833 | 0.039 | 0.014 | 4.4486E-07  | M28 | Emilin2  | 0.025  |
| Lst1     | 1.6576E-11  | 1.42005329 | 0.099 | 0.058 | 5.14734E-07 | M28 | Lst1     | 0.041  |
| Chil3    | 1.66118E-11 | 1.63948345 | 0.029 | 0.008 | 5.15846E-07 | M28 | Chil3    | 0.021  |
| Hck      | 1.73354E-11 | 1.21126845 | 0.031 | 0.01  | 5.38317E-07 | M28 | Hck      | 0.021  |
| Arg1     | 2.12545E-11 | 1.28661906 | 0.03  | 0.009 | 6.60015E-07 | M28 | Arg1     | 0.021  |
| Tnfaip3  | 2.12563E-11 | 1.37389085 | 0.116 | 0.073 | 6.60073E-07 | M28 | Tnfaip3  | 0.043  |
| Gxylt2   | 2.14547E-11 | 0.8504493  | 0.184 | 0.133 | 6.66234E-07 | M28 | Gxylt2   | 0.051  |
| Il2rg    | 2.16556E-11 | 1.48233678 | 0.036 | 0.012 | 6.7247E-07  | M28 | Il2rg    | 0.024  |
| Trac     | 2.45496E-11 | 1.30368021 | 0.027 | 0.007 | 7.62339E-07 | M28 | Trac     | 0.02   |
| Fxyd5    | 2.79027E-11 | 0.84025221 | 0.405 | 0.363 | 8.66464E-07 | M28 | Fxyd5    | 0.042  |
| Mafb     | 2.99386E-11 | 1.36112725 | 0.048 | 0.02  | 9.29684E-07 | M28 | Mafb     | 0.028  |

|             |             |            |       |       |                 |             |       |
|-------------|-------------|------------|-------|-------|-----------------|-------------|-------|
| Bcl2a1d     | 3.02105E-11 | 1.26215223 | 0.041 | 0.016 | 9.38127E-07 M28 | Bcl2a1d     | 0.025 |
| Rassf4      | 3.10291E-11 | 1.1435569  | 0.027 | 0.007 | 9.63548E-07 M28 | Rassf4      | 0.02  |
| P2ry10      | 3.58149E-11 | 1.47180968 | 0.022 | 0.005 | 1.11216E-06 M28 | P2ry10      | 0.017 |
| Tm6sf1      | 5.31947E-11 | 1.32384431 | 0.032 | 0.011 | 1.65185E-06 M28 | Tm6sf1      | 0.021 |
| Fmn1l       | 5.59672E-11 | 1.44018382 | 0.03  | 0.009 | 1.73795E-06 M28 | Fmn1l       | 0.021 |
| Hp          | 5.64412E-11 | 1.35412239 | 0.019 | 0.003 | 1.75267E-06 M28 | Hp          | 0.016 |
| H2-Eb1      | 7.3578E-11  | 1.02645389 | 0.242 | 0.185 | 2.28482E-06 M28 | H2-Eb1      | 0.057 |
| Cd84        | 7.80179E-11 | 0.90345236 | 0.03  | 0.009 | 2.42269E-06 M28 | Cd84        | 0.021 |
| Il2rb       | 7.80526E-11 | 1.61271477 | 0.031 | 0.01  | 2.42377E-06 M28 | Il2rb       | 0.021 |
| Marco       | 8.03247E-11 | 0.81298492 | 0.011 | 0     | 2.49432E-06 M28 | Marco       | 0.011 |
| Trib1       | 8.51908E-11 | 0.8287904  | 0.18  | 0.131 | 2.64543E-06 M28 | Trib1       | 0.049 |
| Gm4907      | 1.16405E-10 | 1.16661847 | 0.013 | 0.001 | 3.61471E-06 M28 | Gm4907      | 0.012 |
| Ltb         | 1.24589E-10 | 1.27370535 | 0.023 | 0.006 | 3.86888E-06 M28 | Ltb         | 0.017 |
| Pilra       | 1.32376E-10 | 1.15894491 | 0.023 | 0.006 | 4.11067E-06 M28 | Pilra       | 0.017 |
| Klrk1       | 1.41357E-10 | 1.61438177 | 0.017 | 0.003 | 4.38955E-06 M28 | Klrk1       | 0.014 |
| Col6a3      | 1.68681E-10 | 0.91078044 | 0.023 | 0.006 | 5.23804E-06 M28 | Col6a3      | 0.017 |
| Tnc         | 1.92688E-10 | 0.83309705 | 0.02  | 0.004 | 5.98353E-06 M28 | Tnc         | 0.016 |
| C3ar1       | 2.05362E-10 | 1.13443906 | 0.043 | 0.018 | 6.37712E-06 M28 | C3ar1       | 0.025 |
| Lcp1        | 2.19355E-10 | 1.03402555 | 0.171 | 0.122 | 6.81164E-06 M28 | Lcp1        | 0.049 |
| Folr2       | 2.95922E-10 | 1.22529457 | 0.023 | 0.006 | 9.18925E-06 M28 | Folr2       | 0.017 |
| AB124611    | 3.31409E-10 | 1.14144684 | 0.037 | 0.014 | 1.02912E-05 M28 | AB124611    | 0.023 |
| Areg        | 3.52924E-10 | 1.19274375 | 0.018 | 0.003 | 1.09593E-05 M28 | Areg        | 0.015 |
| Nkg7        | 3.65864E-10 | 1.34451948 | 0.044 | 0.019 | 1.13612E-05 M28 | Nkg7        | 0.025 |
| Inpp5d      | 3.877E-10   | 1.02705347 | 0.03  | 0.01  | 1.20393E-05 M28 | Inpp5d      | 0.02  |
| Ighg2b      | 4.09712E-10 | 0.82781674 | 0.01  | 0     | 1.27228E-05 M28 | Ighg2b      | 0.01  |
| Nfkbiz      | 4.38195E-10 | 0.93636114 | 0.212 | 0.164 | 1.36073E-05 M28 | Nfkbiz      | 0.048 |
| Cd3d        | 5.30568E-10 | 1.6432947  | 0.033 | 0.012 | 1.64757E-05 M28 | Cd3d        | 0.021 |
| Il1r2       | 6.65106E-10 | 1.06309216 | 0.021 | 0.005 | 2.06535E-05 M28 | Il1r2       | 0.016 |
| Cd93        | 6.91053E-10 | 1.46159767 | 0.039 | 0.016 | 2.14593E-05 M28 | Cd93        | 0.023 |
| Mras        | 6.97955E-10 | 0.86985397 | 0.254 | 0.207 | 2.16736E-05 M28 | Mras        | 0.047 |
| Nckap1l     | 8.09573E-10 | 1.37614556 | 0.036 | 0.014 | 2.51397E-05 M28 | Nckap1l     | 0.022 |
| Cxcl3       | 8.8702E-10  | 1.33037913 | 0.029 | 0.01  | 2.75446E-05 M28 | Cxcl3       | 0.019 |
| Abca1       | 9.92788E-10 | 0.81751997 | 0.086 | 0.051 | 3.0829E-05 M28  | Abca1       | 0.035 |
| F10         | 1.09854E-09 | 1.1129225  | 0.028 | 0.009 | 3.4113E-05 M28  | F10         | 0.019 |
| Acta2       | 1.21177E-09 | 1.08397912 | 0.026 | 0.008 | 3.7629E-05 M28  | Acta2       | 0.018 |
| D16Ertd472e | 1.22771E-09 | 1.26810462 | 0.023 | 0.006 | 3.81242E-05 M28 | D16Ertd472e | 0.017 |
| Sorl1       | 1.31521E-09 | 1.10897313 | 0.017 | 0.003 | 4.08413E-05 M28 | Sorl1       | 0.014 |
| P2ry6       | 1.36888E-09 | 1.13768601 | 0.022 | 0.006 | 4.25078E-05 M28 | P2ry6       | 0.016 |
| Fgr         | 1.75675E-09 | 0.98107433 | 0.019 | 0.004 | 5.45525E-05 M28 | Fgr         | 0.015 |
| Pou2f2      | 1.99413E-09 | 1.30387832 | 0.049 | 0.024 | 6.19237E-05 M28 | Pou2f2      | 0.025 |
| Fgl2        | 2.00334E-09 | 1.1234318  | 0.037 | 0.015 | 6.22098E-05 M28 | Fgl2        | 0.022 |
| Smad7       | 2.1209E-09  | 0.73324545 | 0.237 | 0.193 | 6.58604E-05 M28 | Smad7       | 0.044 |
| Satb1       | 2.31132E-09 | 1.45022133 | 0.014 | 0.002 | 7.17735E-05 M28 | Satb1       | 0.012 |
| Cd48        | 2.40617E-09 | 1.18712347 | 0.034 | 0.013 | 7.47189E-05 M28 | Cd48        | 0.021 |
| Pirb        | 2.46462E-09 | 1.06833248 | 0.036 | 0.015 | 7.65338E-05 M28 | Pirb        | 0.021 |
| Napsa       | 2.55713E-09 | 1.52047261 | 0.03  | 0.011 | 7.94066E-05 M28 | Napsa       | 0.019 |
| Igsf6       | 2.74312E-09 | 1.16939178 | 0.03  | 0.011 | 8.5182E-05 M28  | Igsf6       | 0.019 |
| Abcg1       | 2.93722E-09 | 1.13466934 | 0.018 | 0.004 | 9.12094E-05 M28 | Abcg1       | 0.014 |
| Hcls1       | 3.69121E-09 | 1.12782974 | 0.051 | 0.025 | 0.000114623 M28 | Hcls1       | 0.026 |
| Map1a       | 4.14178E-09 | 0.95753167 | 0.048 | 0.023 | 0.000128615 M28 | Map1a       | 0.025 |
| Runx3       | 6.80856E-09 | 0.91988181 | 0.03  | 0.011 | 0.000211426 M28 | Runx3       | 0.019 |
| Ighm        | 7.18522E-09 | 0.91588926 | 0.017 | 0.004 | 0.000223123 M28 | Ighm        | 0.013 |
| Stab1       | 7.59911E-09 | 1.56134771 | 0.062 | 0.034 | 0.000235975 M28 | Stab1       | 0.028 |
| Fpr2        | 7.84107E-09 | 0.91377915 | 0.014 | 0.002 | 0.000243489 M28 | Fpr2        | 0.012 |
| H2-Aa       | 8.08411E-09 | 0.81658708 | 0.261 | 0.21  | 0.000251036 M28 | H2-Aa       | 0.051 |
| Itgal       | 8.40809E-09 | 1.18455883 | 0.027 | 0.01  | 0.000261096 M28 | Itgal       | 0.017 |
| Ms4a4c      | 8.93626E-09 | 1.31879574 | 0.028 | 0.01  | 0.000277498 M28 | Ms4a4c      | 0.018 |
| Gpr65       | 1.08291E-08 | 1.42412897 | 0.032 | 0.013 | 0.000336276 M28 | Gpr65       | 0.019 |
| Anxa3       | 1.23097E-08 | 1.28131427 | 0.027 | 0.009 | 0.000382254 M28 | Anxa3       | 0.018 |

|             |             |            |       |       |             |     |             |       |
|-------------|-------------|------------|-------|-------|-------------|-----|-------------|-------|
| Hcar2       | 1.24656E-08 | 1.12261183 | 0.028 | 0.01  | 0.000387094 | M28 | Hcar2       | 0.018 |
| Crip1       | 1.56293E-08 | 0.80621599 | 0.423 | 0.402 | 0.000485335 | M28 | Crip1       | 0.021 |
| Col6a2      | 1.61166E-08 | 0.7033966  | 0.016 | 0.004 | 0.000500467 | M28 | Col6a2      | 0.012 |
| Timp3       | 1.70996E-08 | 0.73294246 | 0.18  | 0.137 | 0.000530995 | M28 | Timp3       | 0.043 |
| Rbm44       | 1.77562E-08 | 0.78118037 | 0.04  | 0.018 | 0.000551385 | M28 | Rbm44       | 0.022 |
| Irak3       | 1.92819E-08 | 0.9142463  | 0.011 | 0.001 | 0.000598762 | M28 | Irak3       | 0.01  |
| Cd69        | 1.96831E-08 | 1.05741515 | 0.011 | 0.001 | 0.00061122  | M28 | Cd69        | 0.01  |
| Cd86        | 2.20193E-08 | 0.94225146 | 0.029 | 0.011 | 0.000683766 | M28 | Cd86        | 0.018 |
| Tgif1       | 2.45558E-08 | 0.73625766 | 0.216 | 0.175 | 0.000762531 | M28 | Tgif1       | 0.041 |
| Itgb2       | 2.47639E-08 | 0.94834968 | 0.061 | 0.034 | 0.000768994 | M28 | Itgb2       | 0.027 |
| Myo1g       | 2.88705E-08 | 1.09838972 | 0.034 | 0.015 | 0.000896515 | M28 | Myo1g       | 0.019 |
| Arl5c       | 3.86721E-08 | 1.27538932 | 0.036 | 0.016 | 0.001200884 | M28 | Arl5c       | 0.02  |
| Pmaip1      | 4.48877E-08 | 0.93252551 | 0.018 | 0.005 | 0.001393898 | M28 | Pmaip1      | 0.013 |
| Nfam1       | 4.67937E-08 | 0.95718822 | 0.017 | 0.004 | 0.001453086 | M28 | Nfam1       | 0.013 |
| Mmp9        | 4.82909E-08 | 1.15259925 | 0.013 | 0.002 | 0.001499578 | M28 | Mmp9        | 0.011 |
| Sdc3        | 4.922E-08   | 1.23461611 | 0.067 | 0.039 | 0.001528428 | M28 | Sdc3        | 0.028 |
| Mrc1        | 5.28991E-08 | 1.42966468 | 0.032 | 0.014 | 0.001642674 | M28 | Mrc1        | 0.018 |
| Postn       | 6.56408E-08 | 1.33964568 | 0.02  | 0.006 | 0.002038344 | M28 | Postn       | 0.014 |
| Arhgap45    | 7.25132E-08 | 1.49039987 | 0.056 | 0.031 | 0.002251753 | M28 | Arhgap45    | 0.025 |
| Ikzf1       | 7.27084E-08 | 1.35850551 | 0.02  | 0.006 | 0.002257813 | M28 | Ikzf1       | 0.014 |
| Cd3g        | 8.57784E-08 | 1.12394085 | 0.03  | 0.013 | 0.002663677 | M28 | Cd3g        | 0.017 |
| Hk3         | 8.78882E-08 | 1.03657652 | 0.026 | 0.01  | 0.002729192 | M28 | Hk3         | 0.016 |
| Itgb3       | 1.00121E-07 | 0.8106123  | 0.099 | 0.066 | 0.003109045 | M28 | Itgb3       | 0.033 |
| Prkcb       | 1.1226E-07  | 1.04458969 | 0.011 | 0.002 | 0.003485995 | M28 | Prkcb       | 0.009 |
| Cd300a      | 1.19982E-07 | 1.08430098 | 0.034 | 0.015 | 0.003725795 | M28 | Cd300a      | 0.019 |
| Ebi3        | 1.2251E-07  | 0.94535845 | 0.01  | 0.001 | 0.003804308 | M28 | Ebi3        | 0.009 |
| Icos        | 1.59596E-07 | 0.89021512 | 0.014 | 0.003 | 0.004955942 | M28 | Icos        | 0.011 |
| Gimap1      | 1.81954E-07 | 0.72789518 | 0.016 | 0.004 | 0.005650222 | M28 | Gimap1      | 0.012 |
| Sgk1        | 1.92901E-07 | 0.74202944 | 0.203 | 0.164 | 0.005990143 | M28 | Sgk1        | 0.039 |
| Acp5        | 1.94015E-07 | 1.12643634 | 0.04  | 0.02  | 0.006024749 | M28 | Acp5        | 0.02  |
| Vsir        | 2.0076E-07  | 0.90889613 | 0.027 | 0.011 | 0.006234203 | M28 | Vsir        | 0.016 |
| Cd300lf     | 2.40531E-07 | 0.74151645 | 0.029 | 0.012 | 0.007469215 | M28 | Cd300lf     | 0.017 |
| Il7r        | 2.43192E-07 | 1.1176978  | 0.023 | 0.008 | 0.007551849 | M28 | Il7r        | 0.015 |
| Trbc2       | 2.8491E-07  | 1.0348445  | 0.031 | 0.014 | 0.00884732  | M28 | Trbc2       | 0.017 |
| Fes         | 3.00919E-07 | 1.08719545 | 0.026 | 0.011 | 0.009344436 | M28 | Fes         | 0.015 |
| Igf1        | 3.07704E-07 | 0.97540316 | 0.014 | 0.003 | 0.009555143 | M28 | Igf1        | 0.011 |
| Cd40        | 3.89825E-07 | 0.9609334  | 0.014 | 0.004 | 0.012105248 | M28 | Cd40        | 0.01  |
| Il21r       | 4.08631E-07 | 1.05466269 | 0.016 | 0.005 | 0.012689217 | M28 | Il21r       | 0.011 |
| Sell        | 4.23514E-07 | 1.19583968 | 0.01  | 0.001 | 0.013151365 | M28 | Sell        | 0.009 |
| Bcl2a1a     | 4.51201E-07 | 1.07320602 | 0.023 | 0.008 | 0.014011153 | M28 | Bcl2a1a     | 0.015 |
| Msr1        | 4.62943E-07 | 1.36289806 | 0.032 | 0.015 | 0.014375757 | M28 | Msr1        | 0.017 |
| Fam105a     | 4.83801E-07 | 0.74276949 | 0.028 | 0.012 | 0.015023483 | M28 | Fam105a     | 0.016 |
| Ccl12       | 5.20837E-07 | 1.44169294 | 0.037 | 0.018 | 0.016173554 | M28 | Ccl12       | 0.019 |
| Lat2        | 5.31331E-07 | 1.2773525  | 0.048 | 0.026 | 0.016499425 | M28 | Lat2        | 0.022 |
| Clec4a2     | 5.47681E-07 | 1.03220667 | 0.032 | 0.015 | 0.01700715  | M28 | Clec4a2     | 0.017 |
| Vav1        | 5.84209E-07 | 0.69682543 | 0.02  | 0.007 | 0.018141457 | M28 | Vav1        | 0.013 |
| Ppp1r9b     | 5.95276E-07 | 0.75811987 | 0.217 | 0.181 | 0.018485112 | M28 | Ppp1r9b     | 0.036 |
| Sirpb1c     | 5.96332E-07 | 1.03435567 | 0.017 | 0.005 | 0.018517895 | M28 | Sirpb1c     | 0.012 |
| Gpr141      | 7.06914E-07 | 0.7388273  | 0.01  | 0.002 | 0.021951811 | M28 | Gpr141      | 0.008 |
| Mfap5       | 7.58728E-07 | 0.81295707 | 0.012 | 0.002 | 0.023560769 | M28 | Mfap5       | 0.01  |
| Gas6        | 8.0991E-07  | 1.16260643 | 0.016 | 0.005 | 0.02515014  | M28 | Gas6        | 0.011 |
| 4930523C07R | 8.189E-07   | 0.80263332 | 0.021 | 0.008 | 0.025429288 | M28 | 4930523C07R | 0.013 |
| Thy1        | 8.21344E-07 | 0.75331343 | 0.02  | 0.007 | 0.02550521  | M28 | Thy1        | 0.013 |
| Adam8       | 8.78978E-07 | 0.89031651 | 0.067 | 0.041 | 0.0272949   | M28 | Adam8       | 0.026 |
| L1cam       | 9.05924E-07 | 0.79121488 | 0.064 | 0.039 | 0.028131663 | M28 | L1cam       | 0.025 |
| Gm26740     | 9.20669E-07 | 0.93303018 | 0.011 | 0.002 | 0.028589522 | M28 | Gm26740     | 0.009 |
| Efna2       | 9.9753E-07  | 0.96864565 | 0.031 | 0.014 | 0.030976286 | M28 | Efna2       | 0.017 |
| Ptk2b       | 1.13306E-06 | 0.99642409 | 0.035 | 0.017 | 0.035185026 | M28 | Ptk2b       | 0.018 |
| Atcayos     | 1.15856E-06 | 1.01612659 | 0.051 | 0.029 | 0.035976696 | M28 | Atcayos     | 0.022 |

|          |             |            |       |       |             |     |          |        |
|----------|-------------|------------|-------|-------|-------------|-----|----------|--------|
| Ptger4   | 1.18664E-06 | 0.85299564 | 0.014 | 0.004 | 0.036848818 | M28 | Ptger4   | 0.01   |
| Ptpn22   | 1.21055E-06 | 0.85305134 | 0.026 | 0.011 | 0.037591235 | M28 | Ptpn22   | 0.015  |
| Rab7b    | 1.30524E-06 | 0.73848623 | 0.025 | 0.011 | 0.04053158  | M28 | Rab7b    | 0.014  |
| Nuak2    | 1.65447E-06 | 1.13207262 | 0.019 | 0.007 | 0.051376183 | M28 | Nuak2    | 0.012  |
| Mmp3     | 1.6685E-06  | 1.48382086 | 0.011 | 0.002 | 0.051811977 | M28 | Mmp3     | 0.009  |
| Sla      | 1.92115E-06 | 0.89736655 | 0.02  | 0.008 | 0.059657531 | M28 | Sla      | 0.012  |
| Stap1    | 1.98833E-06 | 0.9933008  | 0.019 | 0.007 | 0.061743603 | M28 | Stap1    | 0.012  |
| Arrdc4   | 2.00057E-06 | 0.79581329 | 0.014 | 0.004 | 0.062123679 | M28 | Arrdc4   | 0.01   |
| Sox9     | 2.06249E-06 | 0.8647363  | 0.108 | 0.078 | 0.064046395 | M28 | Sox9     | 0.03   |
| Txk      | 2.24647E-06 | 0.92583576 | 0.023 | 0.009 | 0.069759572 | M28 | Txk      | 0.014  |
| Hdc      | 2.63318E-06 | 0.73099458 | 0.023 | 0.009 | 0.081767987 | M28 | Hdc      | 0.014  |
| Rnase4   | 2.79207E-06 | 1.07005418 | 0.027 | 0.012 | 0.08670201  | M28 | Rnase4   | 0.015  |
| Il4ra    | 2.80115E-06 | 1.09273888 | 0.036 | 0.019 | 0.086984202 | M28 | Il4ra    | 0.017  |
| Trbc1    | 3.21274E-06 | 1.40969565 | 0.018 | 0.006 | 0.099765122 | M28 | Trbc1    | 0.012  |
| Slit2    | 4.16622E-06 | 0.84552301 | 0.096 | 0.067 | 0.129373779 | M28 | Slit2    | 0.029  |
| Cd300ld  | 4.42618E-06 | 0.77728225 | 0.017 | 0.006 | 0.137446093 | M28 | Cd300ld  | 0.011  |
| Mylpf    | 4.50462E-06 | 1.90681391 | 0.077 | 0.111 | 0.139881835 | M28 | Mylpf    | -0.034 |
| Pglyrp1  | 4.55566E-06 | 0.93750027 | 0.027 | 0.013 | 0.141466788 | M28 | Pglyrp1  | 0.014  |
| Trem1    | 4.59126E-06 | 0.87959114 | 0.012 | 0.003 | 0.14257227  | M28 | Trem1    | 0.009  |
| Tnip3    | 4.61493E-06 | 1.55049609 | 0.019 | 0.007 | 0.143307462 | M28 | Tnip3    | 0.012  |
| Lpl      | 4.71338E-06 | 1.07962512 | 0.03  | 0.014 | 0.146364566 | M28 | Lpl      | 0.016  |
| Ifi207   | 4.93209E-06 | 0.88379111 | 0.044 | 0.025 | 0.153156179 | M28 | Ifi207   | 0.019  |
| Runx2    | 6.30709E-06 | 0.76569774 | 0.032 | 0.016 | 0.195853927 | M28 | Runx2    | 0.016  |
| Col5a1   | 6.58912E-06 | 0.8281906  | 0.045 | 0.026 | 0.204611793 | M28 | Col5a1   | 0.019  |
| Ltb4r1   | 7.26501E-06 | 0.73243362 | 0.015 | 0.005 | 0.225600329 | M28 | Ltb4r1   | 0.01   |
| Il18r1   | 7.32162E-06 | 1.33703022 | 0.01  | 0.002 | 0.227358351 | M28 | Il18r1   | 0.008  |
| Il10     | 7.91722E-06 | 1.02262852 | 0.02  | 0.008 | 0.245853337 | M28 | Il10     | 0.012  |
| Pik3r5   | 8.03287E-06 | 0.90943126 | 0.028 | 0.014 | 0.249444705 | M28 | Pik3r5   | 0.014  |
| Slamf7   | 8.07741E-06 | 1.122873   | 0.022 | 0.009 | 0.250827815 | M28 | Slamf7   | 0.013  |
| Cd2      | 9.73877E-06 | 0.78558939 | 0.017 | 0.006 | 0.302418112 | M28 | Cd2      | 0.011  |
| Tnf      | 9.76184E-06 | 1.0817168  | 0.053 | 0.033 | 0.303134557 | M28 | Tnf      | 0.02   |
| Gimap5   | 1.0415E-05  | 0.87670791 | 0.012 | 0.003 | 0.323417537 | M28 | Gimap5   | 0.009  |
| Cbr2     | 1.08133E-05 | 1.00440694 | 0.025 | 0.012 | 0.335784587 | M28 | Cbr2     | 0.013  |
| Csf2rb2  | 1.36145E-05 | 0.81527213 | 0.015 | 0.005 | 0.422770262 | M28 | Csf2rb2  | 0.01   |
| Krt14    | 1.39007E-05 | 1.05022922 | 0.034 | 0.018 | 0.431657187 | M28 | Krt14    | 0.016  |
| Fli1     | 1.52137E-05 | 0.96546785 | 0.017 | 0.006 | 0.472432553 | M28 | Fli1     | 0.011  |
| Sh2d2a   | 1.78518E-05 | 0.81778915 | 0.025 | 0.012 | 0.554351093 | M28 | Sh2d2a   | 0.013  |
| Rab32    | 1.80376E-05 | 0.73014864 | 0.256 | 0.229 | 0.560122862 | M28 | Rab32    | 0.027  |
| Slc25a31 | 1.81659E-05 | 0.85125926 | 0.039 | 0.022 | 0.564105086 | M28 | Slc25a31 | 0.017  |
| Glipr1   | 1.92262E-05 | 0.89801651 | 0.021 | 0.009 | 0.597031813 | M28 | Glipr1   | 0.012  |
| Lpxn     | 1.99822E-05 | 0.87539755 | 0.024 | 0.011 | 0.6205066   | M28 | Lpxn     | 0.013  |
| Arhgap15 | 2.02671E-05 | 0.76267975 | 0.016 | 0.006 | 0.629354202 | M28 | Arhgap15 | 0.01   |
| Ctsw     | 2.02689E-05 | 1.25609051 | 0.019 | 0.008 | 0.629408751 | M28 | Ctsw     | 0.011  |
| Camk1d   | 2.21185E-05 | 0.8650984  | 0.012 | 0.003 | 0.686845053 | M28 | Camk1d   | 0.009  |
| Gna15    | 2.27749E-05 | 0.73174873 | 0.01  | 0.002 | 0.707230493 | M28 | Gna15    | 0.008  |
| Ptprcap  | 2.44937E-05 | 1.01891199 | 0.025 | 0.012 | 0.760604278 | M28 | Ptprcap  | 0.013  |
| Elmo1    | 2.54225E-05 | 0.96451508 | 0.017 | 0.007 | 0.789443553 | M28 | Elmo1    | 0.01   |
| Cpxm1    | 2.80687E-05 | 1.11217378 | 0.012 | 0.004 | 0.871615826 | M28 | Cpxm1    | 0.008  |
| Nfkbia   | 3.29988E-05 | 0.75883034 | 0.409 | 0.406 | 1           | M28 | Nfkbia   | 0.003  |
| Ifitm6   | 3.46937E-05 | 0.90807849 | 0.014 | 0.005 | 1           | M28 | Ifitm6   | 0.009  |
| Tmem88   | 3.50478E-05 | 0.8386469  | 0.05  | 0.032 | 1           | M28 | Tmem88   | 0.018  |
| Ctsh     | 4.08923E-05 | 0.78986235 | 0.229 | 0.203 | 1           | M28 | Ctsh     | 0.026  |
| Ly9      | 4.51987E-05 | 0.83408404 | 0.017 | 0.007 | 1           | M28 | Ly9      | 0.01   |
| Mfsd12   | 4.53611E-05 | 0.69966833 | 0.114 | 0.088 | 1           | M28 | Mfsd12   | 0.026  |
| Myo5c    | 4.54026E-05 | 0.78803435 | 0.021 | 0.009 | 1           | M28 | Myo5c    | 0.012  |
| Slc27a1  | 4.55472E-05 | 0.78363656 | 0.216 | 0.188 | 1           | M28 | Slc27a1  | 0.028  |
| Tgfb3    | 4.61742E-05 | 0.88426716 | 0.045 | 0.027 | 1           | M28 | Tgfb3    | 0.018  |
| Tagln    | 4.70494E-05 | 1.03080843 | 0.026 | 0.013 | 1           | M28 | Tagln    | 0.013  |
| Kat2b    | 5.39633E-05 | 0.74388287 | 0.271 | 0.249 | 1           | M28 | Kat2b    | 0.022  |



|             |             |            |       |       |       |             |        |
|-------------|-------------|------------|-------|-------|-------|-------------|--------|
| Inhba       | 5.72293E-05 | 1.40309029 | 0.012 | 0.004 | 1 M28 | Inhba       | 0.008  |
| Gimap6      | 6.34228E-05 | 0.9801203  | 0.018 | 0.008 | 1 M28 | Gimap6      | 0.01   |
| Ctla4       | 6.53921E-05 | 0.75795127 | 0.018 | 0.008 | 1 M28 | Ctla4       | 0.01   |
| Cd80        | 6.65205E-05 | 0.78935613 | 0.01  | 0.003 | 1 M28 | Cd80        | 0.007  |
| Rhbd2       | 6.79465E-05 | 0.77998128 | 0.076 | 0.054 | 1 M28 | Rhbd2       | 0.022  |
| Mmp13       | 6.92682E-05 | 0.99003265 | 0.01  | 0.003 | 1 M28 | Mmp13       | 0.007  |
| Fam26f      | 7.54804E-05 | 1.07163365 | 0.021 | 0.01  | 1 M28 | Fam26f      | 0.011  |
| Lrp1        | 8.00513E-05 | 0.76471998 | 0.152 | 0.124 | 1 M28 | Lrp1        | 0.028  |
| Fam129a     | 8.38686E-05 | 0.73938094 | 0.186 | 0.157 | 1 M28 | Fam129a     | 0.029  |
| Mamld1      | 8.60438E-05 | 1.03159068 | 0.035 | 0.02  | 1 M28 | Mamld1      | 0.015  |
| Hes1        | 8.69889E-05 | 0.90173845 | 0.18  | 0.154 | 1 M28 | Hes1        | 0.026  |
| Map6        | 8.97114E-05 | 0.77503946 | 0.121 | 0.096 | 1 M28 | Map6        | 0.025  |
| Gm10451     | 9.53516E-05 | 0.70771267 | 0.023 | 0.011 | 1 M28 | Gm10451     | 0.012  |
| Xdh         | 0.000101616 | 1.08927467 | 0.023 | 0.011 | 1 M28 | Xdh         | 0.012  |
| Col5a2      | 0.000110262 | 1.16951434 | 0.015 | 0.006 | 1 M28 | Col5a2      | 0.009  |
| Pira2       | 0.000140031 | 0.76890263 | 0.01  | 0.003 | 1 M28 | Pira2       | 0.007  |
| Sphk1       | 0.000154322 | 1.01515154 | 0.074 | 0.053 | 1 M28 | Sphk1       | 0.021  |
| Gm6377      | 0.00015545  | 0.8041029  | 0.016 | 0.007 | 1 M28 | Gm6377      | 0.009  |
| Bahd1       | 0.000164099 | 0.71519078 | 0.131 | 0.106 | 1 M28 | Bahd1       | 0.025  |
| Cd3e        | 0.000177881 | 0.79622939 | 0.016 | 0.007 | 1 M28 | Cd3e        | 0.009  |
| Fyb         | 0.000203388 | 0.95609857 | 0.138 | 0.114 | 1 M28 | Fyb         | 0.024  |
| Itk         | 0.000242442 | 0.92582215 | 0.011 | 0.004 | 1 M28 | Itk         | 0.007  |
| Dusp5       | 0.000271023 | 0.69855804 | 0.113 | 0.089 | 1 M28 | Dusp5       | 0.024  |
| Cish        | 0.000276304 | 1.08205565 | 0.027 | 0.015 | 1 M28 | Cish        | 0.012  |
| Gatm        | 0.000277023 | 0.74559132 | 0.021 | 0.01  | 1 M28 | Gatm        | 0.011  |
| Sqor        | 0.000290603 | 0.70221904 | 0.01  | 0.003 | 1 M28 | Sqor        | 0.007  |
| Ikzf4       | 0.000296422 | 0.84027571 | 0.046 | 0.03  | 1 M28 | Ikzf4       | 0.016  |
| Mcub        | 0.000312707 | 0.82752946 | 0.042 | 0.027 | 1 M28 | Mcub        | 0.015  |
| Sfxn3       | 0.000322726 | 0.88865056 | 0.18  | 0.158 | 1 M28 | Sfxn3       | 0.022  |
| Notch1      | 0.000325561 | 0.93315012 | 0.038 | 0.024 | 1 M28 | Notch1      | 0.014  |
| Asprv1      | 0.000327676 | 0.94723888 | 0.01  | 0.004 | 1 M28 | Asprv1      | 0.006  |
| Il18rap     | 0.000353954 | 0.95820212 | 0.012 | 0.005 | 1 M28 | Il18rap     | 0.007  |
| Pnck        | 0.000359524 | 0.83008775 | 0.041 | 0.027 | 1 M28 | Pnck        | 0.014  |
| G0s2        | 0.000377185 | 0.85066824 | 0.059 | 0.082 | 1 M28 | G0s2        | -0.023 |
| Itgax       | 0.000468348 | 1.01281403 | 0.014 | 0.006 | 1 M28 | Itgax       | 0.008  |
| 1700093K21R | 0.000546963 | 0.76966352 | 0.01  | 0.004 | 1 M28 | 1700093K21R | 0.006  |
| Lrmp        | 0.000549429 | 0.92930963 | 0.013 | 0.006 | 1 M28 | Lrmp        | 0.007  |
| Ramp1       | 0.000586822 | 1.09045056 | 0.014 | 0.006 | 1 M28 | Ramp1       | 0.008  |
| Arg2        | 0.000649896 | 1.1182347  | 0.016 | 0.008 | 1 M28 | Arg2        | 0.008  |
| Kif3c       | 0.00069052  | 0.73608128 | 0.125 | 0.103 | 1 M28 | Kif3c       | 0.022  |
| Lfng        | 0.000706487 | 0.71966309 | 0.012 | 0.005 | 1 M28 | Lfng        | 0.007  |
| Rgs2        | 0.00082773  | 0.86974932 | 0.146 | 0.125 | 1 M28 | Rgs2        | 0.021  |
| Basp1       | 0.000889851 | 0.76626907 | 0.338 | 0.33  | 1 M28 | Basp1       | 0.008  |
| Cd33        | 0.000890641 | 0.75061542 | 0.011 | 0.005 | 1 M28 | Cd33        | 0.006  |
| Coro2a      | 0.000904942 | 0.91238126 | 0.011 | 0.005 | 1 M28 | Coro2a      | 0.006  |
| Gm12840     | 0.000995108 | 0.72614431 | 0.01  | 0.004 | 1 M28 | Gm12840     | 0.006  |
| Gm29083     | 0.001151479 | 0.76765568 | 0.068 | 0.05  | 1 M28 | Gm29083     | 0.018  |
| Ccr7        | 0.001372988 | 0.69676101 | 0.013 | 0.006 | 1 M28 | Ccr7        | 0.007  |
| Slamf8      | 0.001392247 | 0.76522643 | 0.013 | 0.006 | 1 M28 | Slamf8      | 0.007  |
| Fas         | 0.001773007 | 0.77013387 | 0.012 | 0.005 | 1 M28 | Fas         | 0.007  |
| Nfatc1      | 0.001854259 | 0.83947794 | 0.031 | 0.02  | 1 M28 | Nfatc1      | 0.011  |
| Clcf1       | 0.001894379 | 0.91062125 | 0.012 | 0.006 | 1 M28 | Clcf1       | 0.006  |
| Alas2       | 0.00246232  | 0.7147516  | 0.12  | 0.1   | 1 M28 | Alas2       | 0.02   |
| Cd36        | 0.002506383 | 0.86681571 | 0.022 | 0.013 | 1 M28 | Cd36        | 0.009  |
| Hopx        | 0.002805792 | 1.00278707 | 0.012 | 0.006 | 1 M28 | Hopx        | 0.006  |
| Macrod1     | 0.003176023 | 0.82883397 | 0.111 | 0.093 | 1 M28 | Macrod1     | 0.018  |
| Egr3        | 0.003457754 | 0.75359216 | 0.016 | 0.009 | 1 M28 | Egr3        | 0.007  |
| Des         | 0.00361281  | 1.21118239 | 0.038 | 0.053 | 1 M28 | Des         | -0.015 |
| Gpr35       | 0.003658824 | 0.80402576 | 0.032 | 0.021 | 1 M28 | Gpr35       | 0.011  |

|             |             |            |       |       |       |             |       |
|-------------|-------------|------------|-------|-------|-------|-------------|-------|
| Dgka        | 0.003679873 | 0.96699449 | 0.018 | 0.01  | 1 M28 | Dgka        | 0.008 |
| Rhoh        | 0.004453373 | 0.97841872 | 0.015 | 0.008 | 1 M28 | Rhoh        | 0.007 |
| 2310001H17R | 0.005433386 | 0.80087206 | 0.011 | 0.005 | 1 M28 | 2310001H17R | 0.006 |
| Clec2d      | 0.006163609 | 0.97545678 | 0.074 | 0.06  | 1 M28 | Clec2d      | 0.014 |
| Zfp365      | 0.006173721 | 0.76380456 | 0.095 | 0.079 | 1 M28 | Zfp365      | 0.016 |
| Pkp3        | 0.006758812 | 1.15515099 | 0.012 | 0.006 | 1 M28 | Pkp3        | 0.006 |
| Atp8b4      | 0.007109597 | 0.82111746 | 0.017 | 0.01  | 1 M28 | Atp8b4      | 0.007 |
| Traf3ip3    | 0.007118877 | 0.91816772 | 0.012 | 0.006 | 1 M28 | Traf3ip3    | 0.006 |
| Fcgr2b      | 0.009356586 | 0.74544865 | 0.093 | 0.078 | 1 M28 | Fcgr2b      | 0.015 |
| Mmp2        | 0.009483515 | 0.69343976 | 0.075 | 0.061 | 1 M28 | Mmp2        | 0.014 |
| Plekho2     | 0.009825584 | 0.74186423 | 0.163 | 0.146 | 1 M28 | Plekho2     | 0.017 |
