# Supplementary material
Source: PubMed Central journal article supplement (PMC8940682)
Supplement: NIHMS1773905-supplement-19.pdf [file NIHMS1773905-supplement-19.pdf]

**Supplemental Table 7. Gene Expression Fold Change in Neutrophil of control vs m28 treated tumors**

| gene_name   | p_val       | avg_log2FC  | pct.1 | pct.2 | p_val_adj   | cluster | gene        | pct.diff |
|-------------|-------------|-------------|-------|-------|-------------|---------|-------------|----------|
| Jun         | 3.2537E-34  | 2.07429479  | 0.582 | 0.22  | 1.01037E-29 | CTRL    | Jun         | 0.362    |
| Atf3        | 7.49378E-20 | 1.362475988 | 0.533 | 0.262 | 2.32704E-15 | CTRL    | Atf3        | 0.271    |
| Ldha        | 7.63542E-19 | 1.230060603 | 0.721 | 0.476 | 2.37103E-14 | CTRL    | Ldha        | 0.245    |
| Ddit3       | 3.07825E-18 | 1.717517302 | 0.369 | 0.146 | 9.5589E-14  | CTRL    | Ddit3       | 0.223    |
| Hcar2       | 5.51513E-18 | 0.87410834  | 0.807 | 0.598 | 1.71261E-13 | CTRL    | Hcar2       | 0.209    |
| Pgk1        | 1.86651E-15 | 0.925544068 | 0.648 | 0.39  | 5.79609E-11 | CTRL    | Pgk1        | 0.258    |
| Ubb         | 1.94176E-15 | 0.746319561 | 0.934 | 0.841 | 6.02975E-11 | CTRL    | Ubb         | 0.093    |
| Dct         | 2.3966E-13  | 0.888733384 | 0.582 | 0.341 | 7.44217E-09 | CTRL    | Dct         | 0.241    |
| Mt1         | 2.64551E-13 | 0.887643628 | 0.525 | 0.281 | 8.21512E-09 | CTRL    | Mt1         | 0.244    |
| Gadd45g     | 1.61582E-12 | 2.224227383 | 0.254 | 0.097 | 5.0176E-08  | CTRL    | Gadd45g     | 0.157    |
| Ddit4       | 2.95094E-12 | 2.130613792 | 0.143 | 0.036 | 9.16354E-08 | CTRL    | Ddit4       | 0.107    |
| Ubc         | 3.668E-12   | 0.733806356 | 0.803 | 0.64  | 1.13902E-07 | CTRL    | Ubc         | 0.163    |
| Nfkbia      | 5.86933E-12 | 0.796010755 | 0.889 | 0.836 | 1.8226E-07  | CTRL    | Nfkbia      | 0.053    |
| Ccl6        | 1.61156E-11 | 1.378750543 | 0.398 | 0.211 | 5.00438E-07 | CTRL    | Ccl6        | 0.187    |
| AY036118    | 2.43171E-11 | 0.786682018 | 0.676 | 0.462 | 7.55118E-07 | CTRL    | AY036118    | 0.214    |
| Dedd2       | 2.4844E-11  | 1.682102891 | 0.25  | 0.102 | 7.7148E-07  | CTRL    | Dedd2       | 0.148    |
| Tpi1        | 7.36419E-11 | 0.729730088 | 0.602 | 0.373 | 2.2868E-06  | CTRL    | Tpi1        | 0.229    |
| Klf6        | 4.91979E-10 | 0.813246471 | 0.594 | 0.373 | 1.52774E-05 | CTRL    | Klf6        | 0.221    |
| Rhov        | 7.56529E-10 | 1.324884114 | 0.25  | 0.109 | 2.34925E-05 | CTRL    | Rhov        | 0.141    |
| Ccnf        | 1.32652E-09 | 3.091552304 | 0.045 | 0.004 | 4.11925E-05 | CTRL    | Ccnf        | 0.041    |
| Ciart       | 2.45513E-09 | 1.706275148 | 0.131 | 0.039 | 7.62393E-05 | CTRL    | Ciart       | 0.092    |
| Slfn4       | 3.45255E-09 | 1.258910199 | 0.25  | 0.108 | 0.000107212 | CTRL    | Slfn4       | 0.142    |
| E230032D23R | 4.27794E-09 | 1.620358661 | 0.164 | 0.057 | 0.000132843 | CTRL    | E230032D23R | 0.107    |
| Manf        | 5.9956E-09  | 1.415507315 | 0.189 | 0.074 | 0.000186181 | CTRL    | Manf        | 0.115    |
| Retnlg      | 8.93026E-09 | 1.59030548  | 0.373 | 0.216 | 0.000277311 | CTRL    | Retnlg      | 0.157    |
| Gm37800     | 1.6924E-08  | 2.00676165  | 0.074 | 0.014 | 0.00052554  | CTRL    | Gm37800     | 0.06     |
| Npm1        | 5.28706E-08 | 0.931854713 | 0.426 | 0.263 | 0.001641792 | CTRL    | Npm1        | 0.163    |
| Suco        | 6.67991E-08 | 1.445603828 | 0.213 | 0.095 | 0.002074312 | CTRL    | Suco        | 0.118    |
| Mt2         | 1.07982E-07 | 1.329156806 | 0.18  | 0.075 | 0.003353151 | CTRL    | Mt2         | 0.105    |
| Pik3r3      | 1.38315E-07 | 3.774593696 | 0.025 | 0.001 | 0.004295109 | CTRL    | Pik3r3      | 0.024    |
| Slc25a4     | 2.51482E-07 | 1.003034163 | 0.246 | 0.12  | 0.007809283 | CTRL    | Slc25a4     | 0.126    |
| Fcgr3       | 5.6369E-07  | 0.982476765 | 0.348 | 0.209 | 0.017504251 | CTRL    | Fcgr3       | 0.139    |
| Dnajb9      | 1.10034E-06 | 1.312505037 | 0.217 | 0.108 | 0.034168859 | CTRL    | Dnajb9      | 0.109    |
| Gypa        | 1.19335E-06 | 2.864328993 | 0.045 | 0.007 | 0.037057078 | CTRL    | Gypa        | 0.038    |
| Xbp1        | 1.62702E-06 | 1.310291518 | 0.139 | 0.055 | 0.050523978 | CTRL    | Xbp1        | 0.084    |
| Pfkl        | 1.7579E-06  | 1.259338512 | 0.197 | 0.095 | 0.054588022 | CTRL    | Pfkl        | 0.102    |
| AC160336.1  | 2.3497E-06  | 0.885119104 | 0.283 | 0.159 | 0.072965242 | CTRL    | AC160336.1  | 0.124    |
| Sectm1a     | 2.37939E-06 | 4.490415882 | 0.02  | 0.001 | 0.073887245 | CTRL    | Sectm1a     | 0.019    |
| Ifi27       | 2.39778E-06 | 1.25498635  | 0.152 | 0.064 | 0.074458248 | CTRL    | Ifi27       | 0.088    |
| Gpsm1       | 3.93581E-06 | 1.773564411 | 0.066 | 0.016 | 0.12221868  | CTRL    | Gpsm1       | 0.05     |
| Hmgb2       | 4.02036E-06 | 0.737322648 | 0.393 | 0.25  | 0.124844279 | CTRL    | Hmgb2       | 0.143    |
| Upp1        | 4.69202E-06 | 0.959030126 | 0.381 | 0.255 | 0.145701155 | CTRL    | Upp1        | 0.126    |
| Ube2c       | 5.08545E-06 | 1.828581863 | 0.09  | 0.029 | 0.157918578 | CTRL    | Ube2c       | 0.061    |
| Higd1a      | 5.11691E-06 | 0.706078834 | 0.357 | 0.223 | 0.158895391 | CTRL    | Higd1a      | 0.134    |
| Cited2      | 5.81511E-06 | 1.177500212 | 0.283 | 0.166 | 0.18057672  | CTRL    | Cited2      | 0.117    |
| Atp6v0d2    | 7.65204E-06 | 1.836952035 | 0.07  | 0.019 | 0.237618643 | CTRL    | Atp6v0d2    | 0.051    |
| Stard4      | 8.03758E-06 | 3.030794321 | 0.033 | 0.004 | 0.249591065 | CTRL    | Stard4      | 0.029    |
| Erg28       | 9.06557E-06 | 2.442344521 | 0.041 | 0.007 | 0.281513247 | CTRL    | Erg28       | 0.034    |
| Gpi1        | 9.32846E-06 | 0.710687559 | 0.41  | 0.275 | 0.289676621 | CTRL    | Gpi1        | 0.135    |
| Csrnp1      | 1.21009E-05 | 0.839928815 | 0.377 | 0.248 | 0.375770365 | CTRL    | Csrnp1      | 0.129    |
| Gla         | 1.35449E-05 | 0.95665204  | 0.27  | 0.159 | 0.420610227 | CTRL    | Gla         | 0.111    |
| Gars        | 1.36664E-05 | 1.613641234 | 0.102 | 0.039 | 0.42438387  | CTRL    | Gars        | 0.063    |
| Ifrd1       | 1.43834E-05 | 0.704833788 | 0.66  | 0.572 | 0.446648696 | CTRL    | Ifrd1       | 0.088    |
| Hspa1b      | 1.55107E-05 | 1.159509822 | 0.082 | 0.027 | 0.481654474 | CTRL    | Hspa1b      | 0.055    |
| Hmox1       | 1.6016E-05  | 0.727771857 | 0.352 | 0.227 | 0.497343768 | CTRL    | Hmox1       | 0.125    |

|             |             |             |       |       |             |      |             |       |
|-------------|-------------|-------------|-------|-------|-------------|------|-------------|-------|
| Ankrd33b    | 1.7989E-05  | 0.770491914 | 0.348 | 0.223 | 0.558612119 | CTRL | Ankrd33b    | 0.125 |
| Ruvbl2      | 1.85924E-05 | 1.458258403 | 0.086 | 0.029 | 0.577350389 | CTRL | Ruvbl2      | 0.057 |
| Cldn1       | 1.92413E-05 | 2.109826323 | 0.053 | 0.013 | 0.597498667 | CTRL | Cldn1       | 0.04  |
| Cyp4f18     | 2.18922E-05 | 0.835142265 | 0.385 | 0.262 | 0.679819735 | CTRL | Cyp4f18     | 0.123 |
| Slfn1       | 2.2675E-05  | 1.04153699  | 0.201 | 0.103 | 0.704127912 | CTRL | Slfn1       | 0.098 |
| Chchd10     | 2.4927E-05  | 0.714450947 | 0.209 | 0.108 | 0.774057322 | CTRL | Chchd10     | 0.101 |
| Ngp         | 2.55271E-05 | 3.075770372 | 0.033 | 0.005 | 0.792693969 | CTRL | Ngp         | 0.028 |
| Adgra3      | 2.60762E-05 | 2.924441455 | 0.02  | 0.001 | 0.809745102 | CTRL | Adgra3      | 0.019 |
| Hspa1a      | 2.64573E-05 | 2.02965771  | 0.098 | 0.037 | 0.821579171 | CTRL | Hspa1a      | 0.061 |
| Ankrd37     | 2.79351E-05 | 1.283895266 | 0.143 | 0.067 | 0.867467204 | CTRL | Ankrd37     | 0.076 |
| Rab23       | 3.4503E-05  | 4.231607339 | 0.012 | 0     | 1           | CTRL | Rab23       | 0.012 |
| Gm17586     | 3.4503E-05  | 4.138532071 | 0.012 | 0     | 1           | CTRL | Gm17586     | 0.012 |
| Cubn        | 3.4503E-05  | 4.065883879 | 0.012 | 0     | 1           | CTRL | Cubn        | 0.012 |
| Sapcd2      | 3.4503E-05  | 4.033572608 | 0.012 | 0     | 1           | CTRL | Sapcd2      | 0.012 |
| Ung         | 3.4503E-05  | 3.749953726 | 0.012 | 0     | 1           | CTRL | Ung         | 0.012 |
| Nek6        | 4.00111E-05 | 1.270790386 | 0.111 | 0.045 | 1           | CTRL | Nek6        | 0.066 |
| Pla2g6      | 4.26066E-05 | 3.305530798 | 0.016 | 0.001 | 1           | CTRL | Pla2g6      | 0.015 |
| A430078G23R | 4.31747E-05 | 2.903327728 | 0.016 | 0.001 | 1           | CTRL | A430078G23R | 0.015 |
| Crispld2    | 5.11245E-05 | 2.188246281 | 0.041 | 0.009 | 1           | CTRL | Crispld2    | 0.032 |
| Smarce1     | 5.46884E-05 | 1.499982691 | 0.07  | 0.022 | 1           | CTRL | Smarce1     | 0.048 |
| Eif2s2      | 5.68296E-05 | 0.904420373 | 0.213 | 0.118 | 1           | CTRL | Eif2s2      | 0.095 |
| Cyp11a1     | 5.77476E-05 | 3.733027223 | 0.025 | 0.003 | 1           | CTRL | Cyp11a1     | 0.022 |
| Tcp1        | 5.87647E-05 | 1.382443928 | 0.123 | 0.055 | 1           | CTRL | Tcp1        | 0.068 |
| Car2        | 6.06268E-05 | 2.938482265 | 0.037 | 0.007 | 1           | CTRL | Car2        | 0.03  |
| Inhba       | 6.23973E-05 | 1.292232736 | 0.143 | 0.069 | 1           | CTRL | Inhba       | 0.074 |
| Proscos     | 6.44971E-05 | 2.083848302 | 0.037 | 0.007 | 1           | CTRL | Proscos     | 0.03  |
| Atpif1      | 7.03065E-05 | 0.786458627 | 0.205 | 0.111 | 1           | CTRL | Atpif1      | 0.094 |
| Pfkip       | 7.23844E-05 | 0.815408974 | 0.25  | 0.147 | 1           | CTRL | Pfkip       | 0.103 |
| 4933433G15R | 7.66987E-05 | 2.240123533 | 0.033 | 0.006 | 1           | CTRL | 4933433G15R | 0.027 |
| Tspo2       | 7.85648E-05 | 1.889656254 | 0.029 | 0.004 | 1           | CTRL | Tspo2       | 0.025 |
| Csnk1e      | 8.41324E-05 | 1.058865782 | 0.111 | 0.047 | 1           | CTRL | Csnk1e      | 0.064 |
| Il15        | 8.58101E-05 | 1.257573328 | 0.119 | 0.053 | 1           | CTRL | Il15        | 0.066 |
| Hsp90b1     | 9.42728E-05 | 0.901079476 | 0.238 | 0.142 | 1           | CTRL | Hsp90b1     | 0.096 |
| Olfm4       | 0.000103302 | 2.295141915 | 0.041 | 0.009 | 1           | CTRL | Olfm4       | 0.032 |
| Creld2      | 0.000128775 | 2.273576885 | 0.045 | 0.011 | 1           | CTRL | Creld2      | 0.034 |
| Cfap20      | 0.000132713 | 1.541484418 | 0.061 | 0.019 | 1           | CTRL | Cfap20      | 0.042 |
| Hk2         | 0.000136349 | 1.054958045 | 0.18  | 0.098 | 1           | CTRL | Hk2         | 0.082 |
| Ugp2        | 0.000151541 | 0.98108179  | 0.16  | 0.082 | 1           | CTRL | Ugp2        | 0.078 |
| Tsr3        | 0.000182336 | 2.114476839 | 0.033 | 0.006 | 1           | CTRL | Tsr3        | 0.027 |
| Tnfrsf23    | 0.000197661 | 0.836576395 | 0.152 | 0.076 | 1           | CTRL | Tnfrsf23    | 0.076 |
| Gm26526     | 0.000211258 | 2.572145913 | 0.025 | 0.004 | 1           | CTRL | Gm26526     | 0.021 |
| Nktr        | 0.000211283 | 0.755065216 | 0.23  | 0.136 | 1           | CTRL | Nktr        | 0.094 |
| Nckap5l     | 0.000214643 | 1.476620968 | 0.057 | 0.018 | 1           | CTRL | Nckap5l     | 0.039 |
| Fam20b      | 0.000214742 | 2.372302241 | 0.025 | 0.004 | 1           | CTRL | Fam20b      | 0.021 |
| Eepd1       | 0.000219916 | 1.663737552 | 0.041 | 0.01  | 1           | CTRL | Eepd1       | 0.031 |
| Eea1        | 0.000234516 | 0.992350535 | 0.152 | 0.077 | 1           | CTRL | Eea1        | 0.075 |
| Eci2        | 0.000248391 | 1.971936006 | 0.045 | 0.012 | 1           | CTRL | Eci2        | 0.033 |
| Hat1        | 0.000266993 | 1.925452944 | 0.049 | 0.014 | 1           | CTRL | Hat1        | 0.035 |
| Arl11       | 0.000310612 | 1.22842408  | 0.066 | 0.023 | 1           | CTRL | Arl11       | 0.043 |
| Atxn7l1     | 0.000312163 | 1.59566926  | 0.049 | 0.014 | 1           | CTRL | Atxn7l1     | 0.035 |
| Tagap       | 0.000317882 | 1.327812291 | 0.057 | 0.019 | 1           | CTRL | Tagap       | 0.038 |
| Fmc1        | 0.000321144 | 1.126768653 | 0.078 | 0.03  | 1           | CTRL | Fmc1        | 0.048 |
| Ndufa5      | 0.000323529 | 0.878506411 | 0.16  | 0.086 | 1           | CTRL | Ndufa5      | 0.074 |
| Acvrl1      | 0.000324143 | 1.302916917 | 0.049 | 0.014 | 1           | CTRL | Acvrl1      | 0.035 |
| Mafk        | 0.000328923 | 1.087747751 | 0.119 | 0.057 | 1           | CTRL | Mafk        | 0.062 |
| St3gal6     | 0.00035118  | 1.035166986 | 0.123 | 0.06  | 1           | CTRL | St3gal6     | 0.063 |
| Dhodh       | 0.000354331 | 3.264351613 | 0.016 | 0.001 | 1           | CTRL | Dhodh       | 0.015 |

|            |             |             |       |       |        |            |       |
|------------|-------------|-------------|-------|-------|--------|------------|-------|
| Mcts2      | 0.000360066 | 2.871680337 | 0.016 | 0.001 | 1 CTRL | Mcts2      | 0.015 |
| Mnd1       | 0.000361997 | 2.941243244 | 0.016 | 0.001 | 1 CTRL | Mnd1       | 0.015 |
| Gm26759    | 0.000369819 | 2.599546915 | 0.016 | 0.001 | 1 CTRL | Gm26759    | 0.015 |
| AC127341.3 | 0.0003896   | 1.443529351 | 0.066 | 0.024 | 1 CTRL | AC127341.3 | 0.042 |
| Fam114a1   | 0.000409343 | 1.932685787 | 0.033 | 0.007 | 1 CTRL | Fam114a1   | 0.026 |
| Cdkn2d     | 0.000413103 | 1.28574851  | 0.094 | 0.042 | 1 CTRL | Cdkn2d     | 0.052 |
| Fmnl2      | 0.000417143 | 1.122879523 | 0.086 | 0.036 | 1 CTRL | Fmnl2      | 0.05  |
| Rmnd5b     | 0.000421016 | 1.567413462 | 0.061 | 0.022 | 1 CTRL | Rmnd5b     | 0.039 |
| Chka       | 0.000426824 | 1.040578985 | 0.164 | 0.09  | 1 CTRL | Chka       | 0.074 |
| Egln3      | 0.000446036 | 0.715179539 | 0.176 | 0.098 | 1 CTRL | Egln3      | 0.078 |
| Rab15      | 0.000449672 | 1.664387313 | 0.053 | 0.017 | 1 CTRL | Rab15      | 0.036 |
| Plpbp      | 0.000482924 | 1.453426887 | 0.07  | 0.027 | 1 CTRL | Plpbp      | 0.043 |
| Snhg12     | 0.000512188 | 1.195150938 | 0.086 | 0.037 | 1 CTRL | Snhg12     | 0.049 |
| Slain2     | 0.000566125 | 1.095358652 | 0.078 | 0.032 | 1 CTRL | Slain2     | 0.046 |
| St6gal1    | 0.000580547 | 2.890532766 | 0.02  | 0.003 | 1 CTRL | St6gal1    | 0.017 |
| Acyp1      | 0.000584783 | 1.656681693 | 0.037 | 0.009 | 1 CTRL | Acyp1      | 0.028 |
| Gmppa      | 0.000585484 | 2.950382715 | 0.025 | 0.004 | 1 CTRL | Gmppa      | 0.021 |
| Smarcd1    | 0.000591961 | 2.594645336 | 0.025 | 0.004 | 1 CTRL | Smarcd1    | 0.021 |
| Fdft1      | 0.000629938 | 1.902785737 | 0.025 | 0.004 | 1 CTRL | Fdft1      | 0.021 |
| Nabp2      | 0.000674357 | 1.680616824 | 0.053 | 0.018 | 1 CTRL | Nabp2      | 0.035 |
| Rpp40      | 0.000722376 | 3.339415401 | 0.012 | 0.001 | 1 CTRL | Rpp40      | 0.011 |
| Plcb4      | 0.000729172 | 2.810390952 | 0.012 | 0.001 | 1 CTRL | Plcb4      | 0.011 |
| Sec22a     | 0.000731452 | 3.136789701 | 0.012 | 0.001 | 1 CTRL | Sec22a     | 0.011 |
| Trim23     | 0.000731452 | 2.965941803 | 0.012 | 0.001 | 1 CTRL | Trim23     | 0.011 |
| Wdpcp      | 0.000731452 | 2.858299413 | 0.012 | 0.001 | 1 CTRL | Wdpcp      | 0.011 |
| Arl15      | 0.000731452 | 2.487617677 | 0.012 | 0.001 | 1 CTRL | Arl15      | 0.011 |
| Gorab      | 0.000736029 | 2.866576569 | 0.012 | 0.001 | 1 CTRL | Gorab      | 0.011 |
| Ctsf       | 0.000736029 | 1.927635551 | 0.012 | 0.001 | 1 CTRL | Ctsf       | 0.011 |
| Pdcd5      | 0.000740302 | 0.859273394 | 0.143 | 0.077 | 1 CTRL | Pdcd5      | 0.066 |
| Osm        | 0.000772278 | 0.728190753 | 0.336 | 0.236 | 1 CTRL | Osm        | 0.1   |
| Trpm1      | 0.000777689 | 1.271466546 | 0.078 | 0.032 | 1 CTRL | Trpm1      | 0.046 |
| Gm20406    | 0.000799516 | 0.847169262 | 0.143 | 0.076 | 1 CTRL | Gm20406    | 0.067 |
| Slc4a1     | 0.000806365 | 2.43236399  | 0.033 | 0.008 | 1 CTRL | Slc4a1     | 0.025 |
| Gm14005    | 0.000811724 | 1.114792875 | 0.07  | 0.027 | 1 CTRL | Gm14005    | 0.043 |
| Nlk        | 0.000815627 | 1.85000603  | 0.033 | 0.008 | 1 CTRL | Nlk        | 0.025 |
| Ccdc126    | 0.000819692 | 0.843604485 | 0.143 | 0.077 | 1 CTRL | Ccdc126    | 0.066 |
| Aph1c      | 0.000861631 | 1.209091801 | 0.074 | 0.03  | 1 CTRL | Aph1c      | 0.044 |
| Id1        | 0.000887374 | 0.909157137 | 0.123 | 0.062 | 1 CTRL | Id1        | 0.061 |
| Srsf2      | 0.000919466 | 0.888318583 | 0.254 | 0.169 | 1 CTRL | Srsf2      | 0.085 |
| Fundc2     | 0.00102954  | 1.074922338 | 0.107 | 0.052 | 1 CTRL | Fundc2     | 0.055 |
| Sesn2      | 0.001045217 | 1.372667115 | 0.074 | 0.031 | 1 CTRL | Sesn2      | 0.043 |
| Cat        | 0.001060444 | 1.981689717 | 0.041 | 0.012 | 1 CTRL | Cat        | 0.029 |
| Zfand2a    | 0.001075872 | 1.579138582 | 0.086 | 0.039 | 1 CTRL | Zfand2a    | 0.047 |
| Cst6       | 0.001091366 | 1.449692455 | 0.053 | 0.019 | 1 CTRL | Cst6       | 0.034 |
| Tmem71     | 0.001104485 | 2.227420416 | 0.029 | 0.006 | 1 CTRL | Tmem71     | 0.023 |
| Gnl1       | 0.001120359 | 0.799491827 | 0.102 | 0.049 | 1 CTRL | Gnl1       | 0.053 |
| Mob3c      | 0.001121383 | 2.124344348 | 0.029 | 0.006 | 1 CTRL | Mob3c      | 0.023 |
| Rnasel     | 0.001132755 | 1.272259403 | 0.053 | 0.019 | 1 CTRL | Rnasel     | 0.034 |
| Cenpf      | 0.001135074 | 1.944460091 | 0.029 | 0.006 | 1 CTRL | Cenpf      | 0.023 |
| Utp6       | 0.001148919 | 1.845247076 | 0.029 | 0.006 | 1 CTRL | Utp6       | 0.023 |
| H2-Q6      | 0.001262866 | 1.372186429 | 0.07  | 0.029 | 1 CTRL | H2-Q6      | 0.041 |
| Cdk1       | 0.001303992 | 1.265502135 | 0.061 | 0.024 | 1 CTRL | Cdk1       | 0.037 |
| Fdps       | 0.001337982 | 1.370062084 | 0.074 | 0.032 | 1 CTRL | Fdps       | 0.042 |
| Sp140      | 0.001399285 | 0.702729724 | 0.164 | 0.094 | 1 CTRL | Sp140      | 0.07  |
| Vps4b      | 0.00141948  | 0.720201953 | 0.152 | 0.085 | 1 CTRL | Vps4b      | 0.067 |
| Rgs1       | 0.001429551 | 1.107432645 | 0.16  | 0.094 | 1 CTRL | Rgs1       | 0.066 |
| Gkap1      | 0.001500695 | 2.138494993 | 0.025 | 0.005 | 1 CTRL | Gkap1      | 0.02  |

|             |             |             |       |       |        |             |       |
|-------------|-------------|-------------|-------|-------|--------|-------------|-------|
| Napa        | 0.001503958 | 0.796737651 | 0.193 | 0.119 | 1 CTRL | Napa        | 0.074 |
| Limch1      | 0.001510597 | 1.835293895 | 0.025 | 0.005 | 1 CTRL | Limch1      | 0.02  |
| Srfbp1      | 0.001528071 | 1.919973045 | 0.025 | 0.005 | 1 CTRL | Srfbp1      | 0.02  |
| Plekhf2     | 0.001533799 | 1.029094918 | 0.074 | 0.032 | 1 CTRL | Plekhf2     | 0.042 |
| Ubxn4       | 0.001610738 | 0.728914691 | 0.164 | 0.096 | 1 CTRL | Ubxn4       | 0.068 |
| Brip1       | 0.001627827 | 3.252924097 | 0.016 | 0.002 | 1 CTRL | Brip1       | 0.014 |
| Coq3        | 0.00164236  | 3.125345794 | 0.016 | 0.002 | 1 CTRL | Coq3        | 0.014 |
| Tuba1a      | 0.001645166 | 0.971658127 | 0.123 | 0.066 | 1 CTRL | Tuba1a      | 0.057 |
| Drosha      | 0.001657013 | 2.614483846 | 0.016 | 0.002 | 1 CTRL | Drosha      | 0.014 |
| Helz        | 0.001671785 | 2.427520876 | 0.016 | 0.002 | 1 CTRL | Helz        | 0.014 |
| Zfp266      | 0.001671785 | 2.22547724  | 0.016 | 0.002 | 1 CTRL | Zfp266      | 0.014 |
| Aste1       | 0.001679217 | 2.25913602  | 0.016 | 0.002 | 1 CTRL | Aste1       | 0.014 |
| Acaca       | 0.001679217 | 2.19950205  | 0.016 | 0.002 | 1 CTRL | Acaca       | 0.014 |
| Nsun5       | 0.001737526 | 2.910988634 | 0.02  | 0.004 | 1 CTRL | Nsun5       | 0.016 |
| Cdc27       | 0.001744436 | 1.414841989 | 0.049 | 0.017 | 1 CTRL | Cdc27       | 0.032 |
| Spr         | 0.001749414 | 1.629528886 | 0.045 | 0.015 | 1 CTRL | Spr         | 0.03  |
| Ntmt1       | 0.001758546 | 1.631870944 | 0.045 | 0.015 | 1 CTRL | Ntmt1       | 0.03  |
| Bet1        | 0.001765197 | 1.684844433 | 0.037 | 0.011 | 1 CTRL | Bet1        | 0.026 |
| Bvht        | 0.001769977 | 2.247593578 | 0.02  | 0.004 | 1 CTRL | Bvht        | 0.016 |
| Dicer1      | 0.001769977 | 2.125475371 | 0.02  | 0.004 | 1 CTRL | Dicer1      | 0.016 |
| Arl13b      | 0.001789714 | 2.153438065 | 0.02  | 0.004 | 1 CTRL | Arl13b      | 0.016 |
| Tmem242     | 0.001802984 | 1.990313535 | 0.02  | 0.004 | 1 CTRL | Tmem242     | 0.016 |
| Rragd       | 0.001855056 | 1.284246434 | 0.061 | 0.024 | 1 CTRL | Rragd       | 0.037 |
| Abhd10      | 0.001860014 | 1.352880038 | 0.045 | 0.015 | 1 CTRL | Abhd10      | 0.03  |
| Rab9        | 0.001870514 | 0.841298187 | 0.148 | 0.084 | 1 CTRL | Rab9        | 0.064 |
| Pag1        | 0.002282481 | 1.05489081  | 0.082 | 0.038 | 1 CTRL | Pag1        | 0.044 |
| Gmps        | 0.002302108 | 1.748162076 | 0.049 | 0.018 | 1 CTRL | Gmps        | 0.031 |
| Tubb4b      | 0.002331317 | 0.816100521 | 0.156 | 0.092 | 1 CTRL | Tubb4b      | 0.064 |
| Wwp2        | 0.002335637 | 0.747837003 | 0.111 | 0.057 | 1 CTRL | Wwp2        | 0.054 |
| Zfp292      | 0.002372596 | 0.746429966 | 0.189 | 0.118 | 1 CTRL | Zfp292      | 0.071 |
| Erf         | 0.002478401 | 1.655784909 | 0.045 | 0.016 | 1 CTRL | Erf         | 0.029 |
| Ell         | 0.002658293 | 0.878870158 | 0.098 | 0.049 | 1 CTRL | Ell         | 0.049 |
| Afdn        | 0.002686239 | 1.652204932 | 0.033 | 0.009 | 1 CTRL | Afdn        | 0.024 |
| Nat6        | 0.00269289  | 1.60999847  | 0.033 | 0.009 | 1 CTRL | Nat6        | 0.024 |
| Slc45a2     | 0.002733419 | 1.251407697 | 0.078 | 0.036 | 1 CTRL | Slc45a2     | 0.042 |
| Rbm38       | 0.002743885 | 0.780219533 | 0.09  | 0.044 | 1 CTRL | Rbm38       | 0.046 |
| Fam213a     | 0.00275903  | 1.81414299  | 0.037 | 0.011 | 1 CTRL | Fam213a     | 0.026 |
| Ercc1       | 0.002773879 | 1.583321783 | 0.033 | 0.009 | 1 CTRL | Ercc1       | 0.024 |
| Flot1       | 0.002787358 | 0.832975718 | 0.111 | 0.058 | 1 CTRL | Flot1       | 0.053 |
| Fam126a     | 0.002808276 | 1.224506962 | 0.033 | 0.009 | 1 CTRL | Fam126a     | 0.024 |
| Ldhb        | 0.002817264 | 0.983158127 | 0.094 | 0.047 | 1 CTRL | Ldhb        | 0.047 |
| Naa50       | 0.002917461 | 0.742445508 | 0.172 | 0.106 | 1 CTRL | Naa50       | 0.066 |
| Csf2ra      | 0.00297811  | 0.755915773 | 0.193 | 0.122 | 1 CTRL | Csf2ra      | 0.071 |
| Tubb3       | 0.003060938 | 2.337983094 | 0.025 | 0.006 | 1 CTRL | Tubb3       | 0.019 |
| 4930523C07R | 0.003098473 | 0.996764237 | 0.07  | 0.031 | 1 CTRL | 4930523C07R | 0.039 |
| Parvb       | 0.003111622 | 2.045570283 | 0.025 | 0.006 | 1 CTRL | Parvb       | 0.019 |
| Ptpn2       | 0.003220825 | 1.075489631 | 0.094 | 0.048 | 1 CTRL | Ptpn2       | 0.046 |
| Got1        | 0.003329927 | 1.022621881 | 0.074 | 0.034 | 1 CTRL | Got1        | 0.04  |
| Mpp6        | 0.003408222 | 1.42659409  | 0.049 | 0.019 | 1 CTRL | Mpp6        | 0.03  |
| Plcx2       | 0.003769876 | 1.333099179 | 0.057 | 0.024 | 1 CTRL | Plcx2       | 0.033 |
| Tnfrsf26    | 0.003848983 | 0.930589347 | 0.066 | 0.029 | 1 CTRL | Tnfrsf26    | 0.037 |
| Fkbp15      | 0.003911303 | 0.920849465 | 0.086 | 0.042 | 1 CTRL | Fkbp15      | 0.044 |
| Inf2        | 0.004065763 | 1.766461664 | 0.029 | 0.008 | 1 CTRL | Inf2        | 0.021 |
| Dcakd       | 0.004097242 | 1.679874713 | 0.029 | 0.008 | 1 CTRL | Dcakd       | 0.021 |
| Rnf14       | 0.004118351 | 1.495021018 | 0.029 | 0.008 | 1 CTRL | Rnf14       | 0.021 |
| Cd151       | 0.004136919 | 1.587030978 | 0.041 | 0.014 | 1 CTRL | Cd151       | 0.027 |
| 3110062M04f | 0.004214569 | 1.598430097 | 0.029 | 0.008 | 1 CTRL | 3110062M04f | 0.021 |

|           |             |             |       |       |        |           |       |
|-----------|-------------|-------------|-------|-------|--------|-----------|-------|
| Abhd8     | 0.004237805 | 2.228969743 | 0.02  | 0.004 | 1 CTRL | Abhd8     | 0.016 |
| Hsph1     | 0.004246639 | 2.323824787 | 0.037 | 0.012 | 1 CTRL | Hsph1     | 0.025 |
| Etv1      | 0.004251684 | 2.238330077 | 0.02  | 0.004 | 1 CTRL | Etv1      | 0.016 |
| Tuba1b    | 0.004270476 | 0.784652913 | 0.164 | 0.103 | 1 CTRL | Tuba1b    | 0.061 |
| Prmt1     | 0.004288987 | 0.966349778 | 0.09  | 0.046 | 1 CTRL | Prmt1     | 0.044 |
| Gli3      | 0.00429357  | 2.092320249 | 0.02  | 0.004 | 1 CTRL | Gli3      | 0.016 |
| Agl       | 0.00429357  | 2.002040856 | 0.02  | 0.004 | 1 CTRL | Agl       | 0.016 |
| Rbm12     | 0.004307615 | 1.942166593 | 0.02  | 0.004 | 1 CTRL | Rbm12     | 0.016 |
| Gm16062   | 0.00433583  | 2.190140716 | 0.02  | 0.004 | 1 CTRL | Gm16062   | 0.016 |
| Sgsm2     | 0.004342909 | 1.940866509 | 0.02  | 0.004 | 1 CTRL | Sgsm2     | 0.016 |
| Dbr1      | 0.004392763 | 1.941525695 | 0.02  | 0.004 | 1 CTRL | Dbr1      | 0.016 |
| Erlin2    | 0.004392763 | 1.719325615 | 0.02  | 0.004 | 1 CTRL | Erlin2    | 0.016 |
| MIlt3     | 0.004407102 | 1.643921812 | 0.02  | 0.004 | 1 CTRL | MIlt3     | 0.016 |
| Nif3l1    | 0.004450373 | 1.524669396 | 0.02  | 0.004 | 1 CTRL | Nif3l1    | 0.016 |
| Ubald1    | 0.004458409 | 1.094947844 | 0.061 | 0.027 | 1 CTRL | Ubald1    | 0.034 |
| Fancc     | 0.004512714 | 3.533428398 | 0.012 | 0.001 | 1 CTRL | Fancc     | 0.011 |
| Nnmt      | 0.004512714 | 2.794823248 | 0.012 | 0.001 | 1 CTRL | Nnmt      | 0.011 |
| Atp1b1    | 0.004534483 | 2.705803932 | 0.012 | 0.001 | 1 CTRL | Atp1b1    | 0.011 |
| Nprl3     | 0.004534483 | 2.57261199  | 0.012 | 0.001 | 1 CTRL | Nprl3     | 0.011 |
| Spc24     | 0.004546143 | 1.420884652 | 0.037 | 0.012 | 1 CTRL | Spc24     | 0.025 |
| Ryr1      | 0.004556347 | 2.877336353 | 0.012 | 0.001 | 1 CTRL | Ryr1      | 0.011 |
| Sgcg      | 0.004556347 | 2.727330003 | 0.012 | 0.001 | 1 CTRL | Sgcg      | 0.011 |
| Pola1     | 0.004556347 | 2.682339389 | 0.012 | 0.001 | 1 CTRL | Pola1     | 0.011 |
| Tmem29    | 0.004556347 | 2.556472315 | 0.012 | 0.001 | 1 CTRL | Tmem29    | 0.011 |
| Psmc3ip   | 0.004556347 | 2.508255705 | 0.012 | 0.001 | 1 CTRL | Psmc3ip   | 0.011 |
| Ppp1r9a   | 0.004578306 | 2.544653613 | 0.012 | 0.001 | 1 CTRL | Ppp1r9a   | 0.011 |
| Gpr89     | 0.004578306 | 2.320313345 | 0.012 | 0.001 | 1 CTRL | Gpr89     | 0.011 |
| Slc35g1   | 0.004578306 | 2.302906416 | 0.012 | 0.001 | 1 CTRL | Slc35g1   | 0.011 |
| Ogfr      | 0.004606252 | 1.127055772 | 0.066 | 0.029 | 1 CTRL | Ogfr      | 0.037 |
| Cnot9     | 0.004622512 | 2.074208477 | 0.012 | 0.001 | 1 CTRL | Cnot9     | 0.011 |
| Hspa4     | 0.004632945 | 0.792522028 | 0.102 | 0.055 | 1 CTRL | Hspa4     | 0.047 |
| Pfkfb4    | 0.004638233 | 1.31629015  | 0.033 | 0.01  | 1 CTRL | Pfkfb4    | 0.023 |
| Rab3gap2  | 0.00475252  | 1.377170119 | 0.049 | 0.019 | 1 CTRL | Rab3gap2  | 0.03  |
| Rnf10     | 0.004765341 | 0.763047653 | 0.098 | 0.052 | 1 CTRL | Rnf10     | 0.046 |
| Prdx2     | 0.004881079 | 1.103565349 | 0.168 | 0.109 | 1 CTRL | Prdx2     | 0.059 |
| Tnfrsf12a | 0.004885965 | 1.320057101 | 0.049 | 0.019 | 1 CTRL | Tnfrsf12a | 0.03  |
| Fgd3      | 0.004887151 | 0.88363523  | 0.078 | 0.037 | 1 CTRL | Fgd3      | 0.041 |
| Hsp90aa1  | 0.00504911  | 0.704738795 | 0.57  | 0.46  | 1 CTRL | Hsp90aa1  | 0.11  |
| Mbd6      | 0.005086141 | 1.010240557 | 0.053 | 0.022 | 1 CTRL | Mbd6      | 0.031 |
| Hs3st1    | 0.005090426 | 3.372491767 | 0.016 | 0.003 | 1 CTRL | Hs3st1    | 0.013 |
| Ahnak2    | 0.005109627 | 2.831498271 | 0.016 | 0.003 | 1 CTRL | Ahnak2    | 0.013 |
| Ogg1      | 0.005128892 | 2.52803128  | 0.016 | 0.003 | 1 CTRL | Ogg1      | 0.013 |
| Rps6ka2   | 0.005164918 | 0.996915139 | 0.07  | 0.032 | 1 CTRL | Rps6ka2   | 0.038 |
| Enoph1    | 0.005167621 | 2.520133463 | 0.016 | 0.003 | 1 CTRL | Enoph1    | 0.013 |
| Sh3tc1    | 0.005187084 | 2.299741321 | 0.016 | 0.003 | 1 CTRL | Sh3tc1    | 0.013 |
| Rai14     | 0.005187084 | 2.182823508 | 0.016 | 0.003 | 1 CTRL | Rai14     | 0.013 |
| Med12l    | 0.005206613 | 2.359125214 | 0.016 | 0.003 | 1 CTRL | Med12l    | 0.013 |
| Tspan31   | 0.005221716 | 1.833143473 | 0.045 | 0.017 | 1 CTRL | Tspan31   | 0.028 |
| Gm32051   | 0.0052656   | 1.733731187 | 0.016 | 0.003 | 1 CTRL | Gm32051   | 0.013 |
| Fam58b    | 0.00530526  | 1.573035165 | 0.016 | 0.003 | 1 CTRL | Fam58b    | 0.013 |
| Mbip      | 0.00530526  | 1.341717253 | 0.016 | 0.003 | 1 CTRL | Mbip      | 0.013 |
| Adgrg3    | 0.005373583 | 0.895953581 | 0.057 | 0.024 | 1 CTRL | Adgrg3    | 0.033 |
| Sun2      | 0.005464691 | 0.943542682 | 0.078 | 0.038 | 1 CTRL | Sun2      | 0.04  |
| Cited1    | 0.005560042 | 1.81959548  | 0.041 | 0.015 | 1 CTRL | Cited1    | 0.026 |
| Top2a     | 0.005980836 | 1.357550809 | 0.057 | 0.025 | 1 CTRL | Top2a     | 0.032 |
| Lockd     | 0.00614054  | 1.781447361 | 0.025 | 0.006 | 1 CTRL | Lockd     | 0.019 |
| Lsm5      | 0.006260403 | 0.858213119 | 0.094 | 0.05  | 1 CTRL | Lsm5      | 0.044 |

|             |             |             |       |       |                 |             |       |
|-------------|-------------|-------------|-------|-------|-----------------|-------------|-------|
| A530032D15R | 0.006326605 | 0.846537487 | 0.045 | 0.017 | 1 CTRL          | A530032D15R | 0.028 |
| Pgm1        | 0.006670158 | 1.143048206 | 0.061 | 0.028 | 1 CTRL          | Pgm1        | 0.033 |
| Rreb1       | 0.006683771 | 1.801467758 | 0.029 | 0.009 | 1 CTRL          | Rreb1       | 0.02  |
| Smarcb1     | 0.006690861 | 1.350321304 | 0.037 | 0.013 | 1 CTRL          | Smarcb1     | 0.024 |
| Nifk        | 0.006785448 | 1.412037276 | 0.037 | 0.013 | 1 CTRL          | Nifk        | 0.024 |
| Anapc5      | 0.006828803 | 1.106908459 | 0.057 | 0.025 | 1 CTRL          | Anapc5      | 0.032 |
| Golgb1      | 0.006867477 | 1.386547779 | 0.037 | 0.013 | 1 CTRL          | Golgb1      | 0.024 |
| C1qtnf6     | 0.006877677 | 1.725546406 | 0.029 | 0.009 | 1 CTRL          | C1qtnf6     | 0.02  |
| Anapc10     | 0.006959952 | 1.623285011 | 0.029 | 0.009 | 1 CTRL          | Anapc10     | 0.02  |
| Vegfb       | 0.007085022 | 1.468748488 | 0.029 | 0.009 | 1 CTRL          | Vegfb       | 0.02  |
| Rab10os     | 0.007145423 | 1.308960121 | 0.053 | 0.023 | 1 CTRL          | Rab10os     | 0.03  |
| Cfl2        | 0.0071615   | 1.509805319 | 0.045 | 0.018 | 1 CTRL          | Cfl2        | 0.027 |
| Vps26a      | 0.00724804  | 1.052431395 | 0.086 | 0.045 | 1 CTRL          | Vps26a      | 0.041 |
| Bcl7b       | 0.007272688 | 1.325075649 | 0.033 | 0.011 | 1 CTRL          | Bcl7b       | 0.022 |
| Tspan14     | 0.007417676 | 0.862907736 | 0.057 | 0.025 | 1 CTRL          | Tspan14     | 0.032 |
| Txn2        | 0.007434123 | 1.169269302 | 0.078 | 0.039 | 1 CTRL          | Txn2        | 0.039 |
| Asap1       | 0.007584203 | 1.199541069 | 0.053 | 0.023 | 1 CTRL          | Asap1       | 0.03  |
| Nckap1      | 0.007646643 | 1.292061543 | 0.045 | 0.018 | 1 CTRL          | Nckap1      | 0.027 |
| Tbc1d15     | 0.007649342 | 0.882409103 | 0.119 | 0.07  | 1 CTRL          | Tbc1d15     | 0.049 |
| Selenos     | 0.007717571 | 0.76671264  | 0.107 | 0.06  | 1 CTRL          | Selenos     | 0.047 |
| Naa38       | 0.008358226 | 1.137521838 | 0.045 | 0.018 | 1 CTRL          | Naa38       | 0.027 |
| Tubb6       | 0.00838361  | 0.936899094 | 0.074 | 0.037 | 1 CTRL          | Tubb6       | 0.037 |
| Cyp51       | 0.008660361 | 1.420852456 | 0.041 | 0.016 | 1 CTRL          | Cyp51       | 0.025 |
| Fbxw8       | 0.008785706 | 2.06494284  | 0.02  | 0.005 | 1 CTRL          | Fbxw8       | 0.015 |
| Isca1       | 0.0088252   | 1.259023349 | 0.041 | 0.016 | 1 CTRL          | Isca1       | 0.025 |
| Reps2       | 0.008837024 | 2.004685947 | 0.02  | 0.005 | 1 CTRL          | Reps2       | 0.015 |
| Syt4        | 0.009036267 | 1.018733508 | 0.098 | 0.055 | 1 CTRL          | Syt4        | 0.043 |
| Gm7160      | 0.009071283 | 1.778405364 | 0.02  | 0.005 | 1 CTRL          | Gm7160      | 0.015 |
| Klh6        | 0.009075332 | 1.248637035 | 0.049 | 0.021 | 1 CTRL          | Klh6        | 0.028 |
| Nsrp1       | 0.009131663 | 0.873583307 | 0.057 | 0.026 | 1 CTRL          | Nsrp1       | 0.031 |
| Wwtr1       | 0.00923052  | 1.520798583 | 0.02  | 0.005 | 1 CTRL          | Wwtr1       | 0.015 |
| Pja2        | 0.009284151 | 1.302881411 | 0.02  | 0.005 | 1 CTRL          | Pja2        | 0.015 |
| Aimp1       | 0.009346225 | 1.319965056 | 0.053 | 0.024 | 1 CTRL          | Aimp1       | 0.029 |
| Ndufa11     | 0.009388922 | 0.759028309 | 0.094 | 0.052 | 1 CTRL          | Ndufa11     | 0.042 |
| Nenf        | 0.009502019 | 0.852180851 | 0.09  | 0.049 | 1 CTRL          | Nenf        | 0.041 |
| Cmc1        | 0.009516963 | 1.577500424 | 0.037 | 0.014 | 1 CTRL          | Cmc1        | 0.023 |
| Rhoh        | 0.00955561  | 0.928512889 | 0.066 | 0.032 | 1 CTRL          | Rhoh        | 0.034 |
| Cars        | 0.009662602 | 1.483336213 | 0.037 | 0.014 | 1 CTRL          | Cars        | 0.023 |
| Dnajb1      | 0.009779863 | 1.094636825 | 0.119 | 0.072 | 1 CTRL          | Dnajb1      | 0.047 |
| Rbm7        | 0.009873216 | 0.815969439 | 0.098 | 0.055 | 1 CTRL          | Rbm7        | 0.043 |
| Lcn2        | 5.65008E-22 | 1.909072842 | 0.604 | 0.287 | 1.75452E-17 M28 | Lcn2        | 0.317 |
| Lyz2        | 3.18014E-19 | 1.731983508 | 0.594 | 0.287 | 9.87528E-15 M28 | Lyz2        | 0.307 |
| Ets2        | 1.81913E-17 | 1.17107547  | 0.659 | 0.377 | 5.64894E-13 M28 | Ets2        | 0.282 |
| Ifitm1      | 5.54133E-17 | 1.545625154 | 0.557 | 0.299 | 1.72075E-12 M28 | Ifitm1      | 0.258 |
| Cd14        | 4.5122E-14  | 0.741114567 | 0.856 | 0.664 | 1.40117E-09 M28 | Cd14        | 0.192 |
| Wfdc21      | 4.70768E-12 | 2.061845166 | 0.381 | 0.168 | 1.46188E-07 M28 | Wfdc21      | 0.213 |
| Fcer1g      | 1.36388E-11 | 0.761027292 | 0.806 | 0.705 | 4.23526E-07 M28 | Fcer1g      | 0.101 |
| Sod2        | 3.75535E-11 | 1.258103896 | 0.463 | 0.262 | 1.16615E-06 M28 | Sod2        | 0.201 |
| Wfdc17      | 9.72577E-11 | 1.760357651 | 0.343 | 0.135 | 3.02014E-06 M28 | Wfdc17      | 0.208 |
| Saa3        | 2.83959E-10 | 5.682566378 | 0.165 | 0.012 | 8.81777E-06 M28 | Saa3        | 0.153 |
| Cyba        | 8.08934E-10 | 1.008244481 | 0.523 | 0.348 | 2.51198E-05 M28 | Cyba        | 0.175 |
| Nr4a1       | 1.07439E-09 | 1.216060775 | 0.339 | 0.139 | 3.33631E-05 M28 | Nr4a1       | 0.2   |
| Mpeg1       | 2.40814E-09 | 2.096758922 | 0.227 | 0.061 | 7.478E-05 M28   | Mpeg1       | 0.166 |
| Cd52        | 1.14399E-08 | 0.718491677 | 0.614 | 0.414 | 0.000355244 M28 | Cd52        | 0.2   |
| Marcks      | 1.6233E-08  | 1.241981053 | 0.337 | 0.164 | 0.000504085 M28 | Marcks      | 0.173 |
| Lst1        | 3.89962E-08 | 1.437243598 | 0.305 | 0.139 | 0.001210949 M28 | Lst1        | 0.166 |
| Dusp2       | 8.2288E-08  | 1.14804011  | 0.326 | 0.152 | 0.002555288 M28 | Dusp2       | 0.174 |

|          |             |             |       |       |             |     |          |       |
|----------|-------------|-------------|-------|-------|-------------|-----|----------|-------|
| Psap     | 1.22751E-07 | 1.028506509 | 0.422 | 0.258 | 0.003811784 | M28 | Psap     | 0.164 |
| Sh3bgrl3 | 1.26707E-07 | 0.795075466 | 0.519 | 0.348 | 0.003934622 | M28 | Sh3bgrl3 | 0.171 |
| Ifitm2   | 1.35397E-07 | 0.704908295 | 0.666 | 0.512 | 0.004204474 | M28 | Ifitm2   | 0.154 |
| Ptgs2    | 1.59736E-07 | 0.92035311  | 0.577 | 0.443 | 0.004960297 | M28 | Ptgs2    | 0.134 |
| Txnrd1   | 2.22205E-07 | 1.838710232 | 0.208 | 0.07  | 0.006900143 | M28 | Txnrd1   | 0.138 |
| Kdm6b    | 2.46128E-07 | 1.091387163 | 0.381 | 0.217 | 0.007643013 | M28 | Kdm6b    | 0.164 |
| Nlrp3    | 2.59962E-07 | 0.967599027 | 0.523 | 0.377 | 0.008072592 | M28 | Nlrp3    | 0.146 |
| Tnfrsf1b | 2.85373E-07 | 1.421605292 | 0.257 | 0.107 | 0.008861684 | M28 | Tnfrsf1b | 0.15  |
| Fyb      | 5.43908E-07 | 1.718785242 | 0.212 | 0.078 | 0.016889967 | M28 | Fyb      | 0.134 |
| Irak3    | 5.61109E-07 | 2.41359931  | 0.15  | 0.033 | 0.017424128 | M28 | Irak3    | 0.117 |
| Fpr2     | 8.25122E-07 | 1.520139242 | 0.244 | 0.107 | 0.025622526 | M28 | Fpr2     | 0.137 |
| Mmp9     | 1.13781E-06 | 1.383207906 | 0.306 | 0.168 | 0.035332518 | M28 | Mmp9     | 0.138 |
| C3       | 1.15534E-06 | 1.365476425 | 0.23  | 0.094 | 0.035876841 | M28 | C3       | 0.136 |
| Nr4a3    | 1.16271E-06 | 1.83004827  | 0.17  | 0.049 | 0.036105576 | M28 | Nr4a3    | 0.121 |
| Ikbke    | 1.49154E-06 | 2.689416485 | 0.125 | 0.02  | 0.046316826 | M28 | Ikbke    | 0.105 |
| Lcp1     | 1.72708E-06 | 0.912361788 | 0.379 | 0.225 | 0.053631165 | M28 | Lcp1     | 0.154 |
| Ptprc    | 1.81923E-06 | 1.250687305 | 0.287 | 0.148 | 0.056492584 | M28 | Ptprc    | 0.139 |
| Apoe     | 2.20548E-06 | 0.883719867 | 0.446 | 0.316 | 0.06848678  | M28 | Apoe     | 0.13  |
| Vasp     | 4.72823E-06 | 1.046445384 | 0.36  | 0.221 | 0.146825642 | M28 | Vasp     | 0.139 |
| Dusp16   | 4.85113E-06 | 1.185685886 | 0.253 | 0.119 | 0.15064224  | M28 | Dusp16   | 0.134 |
| Csf3     | 7.8726E-06  | 2.22211857  | 0.139 | 0.037 | 0.244467719 | M28 | Csf3     | 0.102 |
| Marcks1  | 7.95663E-06 | 0.830489824 | 0.459 | 0.32  | 0.247077109 | M28 | Marcks1  | 0.139 |
| Ctss     | 8.13524E-06 | 1.69420888  | 0.182 | 0.07  | 0.252623552 | M28 | Ctss     | 0.112 |
| Fosl2    | 1.16108E-05 | 1.264816552 | 0.271 | 0.148 | 0.360550324 | M28 | Fosl2    | 0.123 |
| Malt1    | 1.58323E-05 | 1.926015718 | 0.156 | 0.053 | 0.491640597 | M28 | Malt1    | 0.103 |
| Mapkapk2 | 1.5971E-05  | 1.06103029  | 0.293 | 0.168 | 0.495947598 | M28 | Mapkapk2 | 0.125 |
| Id3      | 2.04724E-05 | 2.978013297 | 0.112 | 0.025 | 0.635729557 | M28 | Id3      | 0.087 |
| Rel      | 2.31053E-05 | 1.709713288 | 0.165 | 0.061 | 0.71749023  | M28 | Rel      | 0.104 |
| Atox1    | 2.79385E-05 | 0.891254536 | 0.296 | 0.168 | 0.867574308 | M28 | Atox1    | 0.128 |
| C1qb     | 3.28308E-05 | 2.254904094 | 0.121 | 0.033 | 1           | M28 | C1qb     | 0.088 |
| Nab1     | 3.82585E-05 | 1.73872933  | 0.14  | 0.045 | 1           | M28 | Nab1     | 0.095 |
| Cst3     | 4.20714E-05 | 0.925653574 | 0.356 | 0.234 | 1           | M28 | Cst3     | 0.122 |
| Tnfaip2  | 4.54242E-05 | 0.860372174 | 0.269 | 0.143 | 1           | M28 | Tnfaip2  | 0.126 |
| Rac2     | 5.14464E-05 | 0.72133943  | 0.344 | 0.213 | 1           | M28 | Rac2     | 0.131 |
| Skil     | 5.5653E-05  | 1.066553054 | 0.247 | 0.135 | 1           | M28 | Skil     | 0.112 |
| Traf1    | 7.88433E-05 | 0.955737356 | 0.253 | 0.135 | 1           | M28 | Traf1    | 0.118 |
| Atp2b1   | 8.24567E-05 | 0.817667048 | 0.304 | 0.184 | 1           | M28 | Atp2b1   | 0.12  |
| Sema4d   | 8.50177E-05 | 1.361851259 | 0.19  | 0.09  | 1           | M28 | Sema4d   | 0.1   |
| Pou2f2   | 9.79185E-05 | 2.495204028 | 0.095 | 0.02  | 1           | M28 | Pou2f2   | 0.075 |
| Dot1l    | 0.000107578 | 1.614939728 | 0.138 | 0.049 | 1           | M28 | Dot1l    | 0.089 |
| Fosb     | 0.000119238 | 1.671383446 | 0.157 | 0.066 | 1           | M28 | Fosb     | 0.091 |
| Tgm2     | 0.000122154 | 1.100553561 | 0.302 | 0.193 | 1           | M28 | Tgm2     | 0.109 |
| Ubash3b  | 0.000125492 | 2.734580951 | 0.066 | 0.004 | 1           | M28 | Ubash3b  | 0.062 |
| Lrrc25   | 0.000132541 | 1.178296543 | 0.164 | 0.07  | 1           | M28 | Lrrc25   | 0.094 |
| Cd74     | 0.000138293 | 1.102757052 | 0.219 | 0.115 | 1           | M28 | Cd74     | 0.104 |
| Tnip1    | 0.000145114 | 1.857439521 | 0.123 | 0.041 | 1           | M28 | Tnip1    | 0.082 |
| H2-Aa    | 0.000149734 | 2.386449543 | 0.098 | 0.025 | 1           | M28 | H2-Aa    | 0.073 |
| Itm2b    | 0.000180913 | 0.758766552 | 0.406 | 0.299 | 1           | M28 | Itm2b    | 0.107 |
| Nadk     | 0.000212041 | 1.653054949 | 0.142 | 0.057 | 1           | M28 | Nadk     | 0.085 |
| Lyn      | 0.000212727 | 1.33795097  | 0.164 | 0.074 | 1           | M28 | Lyn      | 0.09  |
| Tapbp    | 0.000233042 | 1.321708683 | 0.148 | 0.061 | 1           | M28 | Tapbp    | 0.087 |
| Eil2     | 0.000241288 | 1.644442039 | 0.131 | 0.049 | 1           | M28 | Eil2     | 0.082 |
| Pla2g7   | 0.000303059 | 0.981993524 | 0.242 | 0.143 | 1           | M28 | Pla2g7   | 0.099 |
| Sbno2    | 0.000326271 | 1.759347963 | 0.1   | 0.029 | 1           | M28 | Sbno2    | 0.071 |
| Chil1    | 0.00032829  | 1.701270578 | 0.138 | 0.057 | 1           | M28 | Chil1    | 0.081 |
| Hck      | 0.000337888 | 1.678095641 | 0.093 | 0.025 | 1           | M28 | Hck      | 0.068 |
| Unc93b1  | 0.00037592  | 2.038642588 | 0.092 | 0.025 | 1           | M28 | Unc93b1  | 0.067 |

|           |             |             |       |       |   |     |           |       |
|-----------|-------------|-------------|-------|-------|---|-----|-----------|-------|
| Gsr       | 0.000398539 | 0.780516612 | 0.367 | 0.262 | 1 | M28 | Gsr       | 0.105 |
| Ncf4      | 0.000431369 | 0.732389196 | 0.232 | 0.131 | 1 | M28 | Ncf4      | 0.101 |
| H2-Ab1    | 0.000454772 | 1.764403238 | 0.114 | 0.041 | 1 | M28 | H2-Ab1    | 0.073 |
| Reep5     | 0.000496602 | 1.111561937 | 0.178 | 0.09  | 1 | M28 | Reep5     | 0.088 |
| Ltb       | 0.000609546 | 1.902125366 | 0.083 | 0.02  | 1 | M28 | Ltb       | 0.063 |
| Dock10    | 0.000611337 | 1.54106217  | 0.133 | 0.057 | 1 | M28 | Dock10    | 0.076 |
| Laptm5    | 0.00062769  | 0.930090492 | 0.281 | 0.189 | 1 | M28 | Laptm5    | 0.092 |
| Ccl5      | 0.000662198 | 2.790663622 | 0.062 | 0.008 | 1 | M28 | Ccl5      | 0.054 |
| Esd       | 0.000675337 | 0.880008098 | 0.245 | 0.148 | 1 | M28 | Esd       | 0.097 |
| Fas       | 0.000675643 | 1.618697919 | 0.131 | 0.057 | 1 | M28 | Fas       | 0.074 |
| Grk2      | 0.000696416 | 1.243233995 | 0.124 | 0.049 | 1 | M28 | Grk2      | 0.075 |
| Col1a2    | 0.000722918 | 3.625931471 | 0.053 | 0.004 | 1 | M28 | Col1a2    | 0.049 |
| Nos2      | 0.000839969 | 1.786428293 | 0.08  | 0.02  | 1 | M28 | Nos2      | 0.06  |
| Kdm7a     | 0.00084567  | 1.625727466 | 0.093 | 0.029 | 1 | M28 | Kdm7a     | 0.064 |
| Crip1     | 0.000868484 | 2.250174892 | 0.08  | 0.02  | 1 | M28 | Crip1     | 0.06  |
| Cd300a    | 0.000922156 | 0.991619948 | 0.143 | 0.066 | 1 | M28 | Cd300a    | 0.077 |
| Col3a1    | 0.001071259 | 5.764970914 | 0.042 | 0     | 1 | M28 | Col3a1    | 0.042 |
| Dgat1     | 0.001130366 | 0.80603968  | 0.143 | 0.066 | 1 | M28 | Dgat1     | 0.077 |
| Rnd1      | 0.001185834 | 5.691222733 | 0.042 | 0     | 1 | M28 | Rnd1      | 0.042 |
| Dennd4a   | 0.001234847 | 0.811898788 | 0.207 | 0.119 | 1 | M28 | Dennd4a   | 0.088 |
| Samhd1    | 0.001319775 | 1.087448026 | 0.181 | 0.098 | 1 | M28 | Samhd1    | 0.083 |
| Flna      | 0.001348915 | 1.581416925 | 0.111 | 0.045 | 1 | M28 | Flna      | 0.066 |
| Pirb      | 0.001452868 | 1.433611236 | 0.094 | 0.033 | 1 | M28 | Pirb      | 0.061 |
| Itgb2     | 0.001476376 | 1.216290346 | 0.133 | 0.061 | 1 | M28 | Itgb2     | 0.072 |
| Selenof   | 0.001518572 | 1.382512846 | 0.106 | 0.041 | 1 | M28 | Selenof   | 0.065 |
| Atxn7l3b  | 0.001534366 | 2.926476407 | 0.055 | 0.008 | 1 | M28 | Atxn7l3b  | 0.047 |
| Cpd       | 0.001568366 | 2.52571181  | 0.068 | 0.016 | 1 | M28 | Cpd       | 0.052 |
| Ptpn1     | 0.001578494 | 1.073101886 | 0.162 | 0.086 | 1 | M28 | Ptpn1     | 0.076 |
| Diaph1    | 0.001604623 | 0.880013171 | 0.189 | 0.107 | 1 | M28 | Diaph1    | 0.082 |
| Abr       | 0.001724454 | 1.611323737 | 0.098 | 0.037 | 1 | M28 | Abr       | 0.061 |
| Rbms1     | 0.001726803 | 1.078842385 | 0.153 | 0.078 | 1 | M28 | Rbms1     | 0.075 |
| Ehd1      | 0.001732166 | 0.821731599 | 0.275 | 0.184 | 1 | M28 | Ehd1      | 0.091 |
| Gbp2      | 0.001745107 | 1.270518184 | 0.105 | 0.041 | 1 | M28 | Gbp2      | 0.064 |
| R3hdm2    | 0.001780537 | 5.47186701  | 0.039 | 0     | 1 | M28 | R3hdm2    | 0.039 |
| Rnf144a   | 0.001808898 | 3.628529672 | 0.047 | 0.004 | 1 | M28 | Rnf144a   | 0.043 |
| Pde4b     | 0.001818134 | 0.881354709 | 0.219 | 0.135 | 1 | M28 | Pde4b     | 0.084 |
| Coq10b    | 0.001841358 | 1.110112786 | 0.16  | 0.086 | 1 | M28 | Coq10b    | 0.074 |
| Tmem88    | 0.001887143 | 1.896722202 | 0.055 | 0.008 | 1 | M28 | Tmem88    | 0.047 |
| Tgfbi     | 0.002307233 | 1.403368443 | 0.159 | 0.09  | 1 | M28 | Tgfbi     | 0.069 |
| Trem14    | 0.002415489 | 5.422408239 | 0.037 | 0     | 1 | M28 | Trem14    | 0.037 |
| Ncf1      | 0.002444522 | 0.976143955 | 0.192 | 0.115 | 1 | M28 | Ncf1      | 0.077 |
| Ly6e      | 0.002472649 | 1.062963393 | 0.118 | 0.053 | 1 | M28 | Ly6e      | 0.065 |
| Fus       | 0.002651522 | 0.797060504 | 0.239 | 0.156 | 1 | M28 | Fus       | 0.083 |
| Ctsa      | 0.00270162  | 1.708414438 | 0.083 | 0.029 | 1 | M28 | Ctsa      | 0.054 |
| Wipf1     | 0.002833535 | 1.38238059  | 0.09  | 0.033 | 1 | M28 | Wipf1     | 0.057 |
| Mob1a     | 0.002936888 | 1.53026247  | 0.083 | 0.029 | 1 | M28 | Mob1a     | 0.054 |
| Nfam1     | 0.002973571 | 1.343951285 | 0.1   | 0.041 | 1 | M28 | Nfam1     | 0.059 |
| Col1a1    | 0.003041428 | 1.780987369 | 0.058 | 0.012 | 1 | M28 | Col1a1    | 0.046 |
| Kmt5a     | 0.003105095 | 1.752715812 | 0.07  | 0.02  | 1 | M28 | Kmt5a     | 0.05  |
| Slco3a1   | 0.00343585  | 3.011989287 | 0.042 | 0.004 | 1 | M28 | Slco3a1   | 0.038 |
| Tsc22d3   | 0.003629977 | 0.908367598 | 0.234 | 0.156 | 1 | M28 | Tsc22d3   | 0.078 |
| Abca1     | 0.00366811  | 2.197894769 | 0.068 | 0.02  | 1 | M28 | Abca1     | 0.048 |
| Rab11fip1 | 0.003685205 | 1.070108427 | 0.19  | 0.119 | 1 | M28 | Rab11fip1 | 0.071 |
| Slc44a1   | 0.003732992 | 2.138482794 | 0.056 | 0.012 | 1 | M28 | Slc44a1   | 0.044 |
| Bcl2a1d   | 0.003792161 | 1.36835056  | 0.128 | 0.066 | 1 | M28 | Bcl2a1d   | 0.062 |
| Ptafr     | 0.003880233 | 0.847218848 | 0.298 | 0.225 | 1 | M28 | Ptafr     | 0.073 |
| Rtn4      | 0.004097208 | 0.809242641 | 0.174 | 0.102 | 1 | M28 | Rtn4      | 0.072 |



|             |             |             |       |       |       |             |       |
|-------------|-------------|-------------|-------|-------|-------|-------------|-------|
| Capzb       | 0.00410373  | 0.901616024 | 0.202 | 0.127 | 1 M28 | Capzb       | 0.075 |
| Trps1       | 0.004202618 | 1.651466865 | 0.085 | 0.033 | 1 M28 | Trps1       | 0.052 |
| Nfkb2       | 0.004410337 | 1.527075977 | 0.068 | 0.02  | 1 M28 | Nfkb2       | 0.048 |
| Adgre5      | 0.004607342 | 0.713367468 | 0.152 | 0.082 | 1 M28 | Adgre5      | 0.07  |
| Csf1r       | 0.004648507 | 1.685307332 | 0.079 | 0.029 | 1 M28 | Csf1r       | 0.05  |
| Ikzf1       | 0.004697727 | 2.449539761 | 0.047 | 0.008 | 1 M28 | Ikzf1       | 0.039 |
| Bcl10       | 0.004783233 | 1.317551385 | 0.12  | 0.061 | 1 M28 | Bcl10       | 0.059 |
| Clec4n      | 0.004941385 | 1.091352832 | 0.19  | 0.119 | 1 M28 | Clec4n      | 0.071 |
| Frrs1       | 0.004964227 | 2.829029636 | 0.053 | 0.012 | 1 M28 | Frrs1       | 0.041 |
| Ccl2        | 0.005219958 | 1.33912994  | 0.102 | 0.045 | 1 M28 | Ccl2        | 0.057 |
| Wac         | 0.005221982 | 1.926374463 | 0.082 | 0.033 | 1 M28 | Wac         | 0.049 |
| Son         | 0.00546515  | 0.89114748  | 0.196 | 0.127 | 1 M28 | Son         | 0.069 |
| Map4k4      | 0.005664246 | 1.215339698 | 0.126 | 0.066 | 1 M28 | Map4k4      | 0.06  |
| Lnpep       | 0.00592529  | 1.452514159 | 0.083 | 0.033 | 1 M28 | Lnpep       | 0.05  |
| Gpr132      | 0.00595986  | 1.071117574 | 0.101 | 0.045 | 1 M28 | Gpr132      | 0.056 |
| Egr3        | 0.006124793 | 1.601203495 | 0.077 | 0.029 | 1 M28 | Egr3        | 0.048 |
| 2310001H17R | 0.006257413 | 1.026011844 | 0.136 | 0.074 | 1 M28 | 2310001H17R | 0.062 |
| Rab5c       | 0.006492474 | 1.067157193 | 0.125 | 0.066 | 1 M28 | Rab5c       | 0.059 |
| Igsf6       | 0.006552454 | 0.977893468 | 0.126 | 0.066 | 1 M28 | Igsf6       | 0.06  |
| Emp3        | 0.006681009 | 1.106199805 | 0.155 | 0.09  | 1 M28 | Emp3        | 0.065 |
| Tmem208     | 0.006811591 | 3.146420378 | 0.037 | 0.004 | 1 M28 | Tmem208     | 0.033 |
| Neur13      | 0.006831123 | 1.150076931 | 0.138 | 0.078 | 1 M28 | Neur13      | 0.06  |
| Syk         | 0.006897433 | 0.944355904 | 0.148 | 0.086 | 1 M28 | Syk         | 0.062 |
| Nfkb1       | 0.007204627 | 0.740711938 | 0.161 | 0.094 | 1 M28 | Nfkb1       | 0.067 |
| AW112010    | 0.007348635 | 2.192998831 | 0.051 | 0.012 | 1 M28 | AW112010    | 0.039 |
| Itgal       | 0.007452615 | 1.515530937 | 0.07  | 0.025 | 1 M28 | Itgal       | 0.045 |
| Gm47283     | 0.007604666 | 0.921805663 | 0.105 | 0.049 | 1 M28 | Gm47283     | 0.056 |
| Sirt7       | 0.00821586  | 5.116959659 | 0.028 | 0     | 1 M28 | Sirt7       | 0.028 |
| Ggct        | 0.008350925 | 1.53088032  | 0.069 | 0.025 | 1 M28 | Ggct        | 0.044 |
| Itga5       | 0.008417242 | 2.897034738 | 0.036 | 0.004 | 1 M28 | Itga5       | 0.032 |
| C1qa        | 0.008545079 | 1.701757925 | 0.084 | 0.037 | 1 M28 | C1qa        | 0.047 |
| Med13l      | 0.008916116 | 1.442910795 | 0.068 | 0.025 | 1 M28 | Med13l      | 0.043 |
| Csf3r       | 0.008938696 | 0.693454915 | 0.281 | 0.213 | 1 M28 | Csf3r       | 0.068 |
| Retreg1     | 0.009100068 | 0.812963777 | 0.164 | 0.102 | 1 M28 | Retreg1     | 0.062 |
| Sirt1       | 0.009103238 | 5.05114993  | 0.027 | 0     | 1 M28 | Sirt1       | 0.027 |
| Pxn         | 0.009121179 | 0.969443961 | 0.127 | 0.07  | 1 M28 | Pxn         | 0.057 |
| Plekhb2     | 0.009260609 | 2.482295589 | 0.042 | 0.008 | 1 M28 | Plekhb2     | 0.034 |
| Cr1l        | 0.009431387 | 2.700457174 | 0.035 | 0.004 | 1 M28 | Cr1l        | 0.031 |
| Plekho2     | 0.009456294 | 1.134680076 | 0.106 | 0.053 | 1 M28 | Plekho2     | 0.053 |
| Inpp5d      | 0.009463948 | 1.519599945 | 0.078 | 0.033 | 1 M28 | Inpp5d      | 0.045 |
