# Supplementary material
Source: PubMed Central journal article supplement (PMC8940682)
Supplement: NIHMS1773905-supplement-20.pdf [file NIHMS1773905-supplement-20.pdf]

**Supplemental Table 8. Gene Expression Fold Change in NK cells of control vs m28 treated tumors**

| gene_name   | p_val       | avg_log2FC  | pct.1 | pct.2 | p_val_adj   | cluster | gene        | pct.diff |
|-------------|-------------|-------------|-------|-------|-------------|---------|-------------|----------|
| Gapdh       | 7.0601E-29  | 1.081482373 | 0.924 | 0.699 | 2.19237E-24 | CTRL    | Gapdh       | 0.225    |
| Tpi1        | 1.40992E-17 | 1.371791352 | 0.485 | 0.232 | 4.37822E-13 | CTRL    | Tpi1        | 0.253    |
| Dct         | 2.29615E-16 | 1.131593646 | 0.556 | 0.298 | 7.13024E-12 | CTRL    | Dct         | 0.258    |
| Pmel        | 1.5211E-15  | 1.166046176 | 0.49  | 0.238 | 4.72346E-11 | CTRL    | Pmel        | 0.252    |
| Mt1         | 2.93408E-14 | 1.421359789 | 0.429 | 0.211 | 9.11118E-10 | CTRL    | Mt1         | 0.218    |
| Aldoa       | 1.12033E-12 | 1.015280189 | 0.667 | 0.468 | 3.47896E-08 | CTRL    | Aldoa       | 0.199    |
| AY036118    | 1.42554E-12 | 0.773058633 | 0.828 | 0.671 | 4.42672E-08 | CTRL    | AY036118    | 0.157    |
| Eno1        | 4.59287E-11 | 1.221541516 | 0.404 | 0.211 | 1.42622E-06 | CTRL    | Eno1        | 0.193    |
| Pgk1        | 9.04967E-11 | 1.114755871 | 0.49  | 0.299 | 2.81019E-06 | CTRL    | Pgk1        | 0.191    |
| mt-Atp8     | 3.64958E-10 | 0.987665564 | 0.687 | 0.513 | 1.1333E-05  | CTRL    | mt-Atp8     | 0.174    |
| Cited1      | 4.81685E-10 | 2.931925848 | 0.071 | 0.01  | 1.49578E-05 | CTRL    | Cited1      | 0.061    |
| Mif         | 2.94896E-09 | 0.907440785 | 0.591 | 0.412 | 9.15739E-05 | CTRL    | Mif         | 0.179    |
| Pkm         | 1.57501E-08 | 0.863155584 | 0.581 | 0.425 | 0.000489089 | CTRL    | Pkm         | 0.156    |
| Tespa1      | 3.40601E-08 | 1.692762389 | 0.141 | 0.045 | 0.001057667 | CTRL    | Tespa1      | 0.096    |
| Nek3        | 3.46607E-08 | 4.378447511 | 0.02  | 0     | 0.001076318 | CTRL    | Nek3        | 0.02     |
| Gm32051     | 3.46607E-08 | 3.251070305 | 0.02  | 0     | 0.001076318 | CTRL    | Gm32051     | 0.02     |
| Ptgds       | 3.83046E-08 | 1.221159449 | 0.263 | 0.125 | 0.001189473 | CTRL    | Ptgds       | 0.138    |
| Zfp637      | 4.06236E-07 | 3.00859535  | 0.04  | 0.005 | 0.01261484  | CTRL    | Zfp637      | 0.035    |
| Gpnmb       | 6.49271E-07 | 0.828840822 | 0.328 | 0.183 | 0.020161825 | CTRL    | Gpnmb       | 0.145    |
| Tsc22d3     | 8.10047E-07 | 0.88127563  | 0.475 | 0.332 | 0.02515439  | CTRL    | Tsc22d3     | 0.143    |
| Mt2         | 9.60562E-07 | 1.683136186 | 0.152 | 0.06  | 0.029828332 | CTRL    | Mt2         | 0.092    |
| Hspb2       | 1.67307E-06 | 3.410374938 | 0.03  | 0.003 | 0.051953777 | CTRL    | Hspb2       | 0.027    |
| Tubg2       | 1.79339E-06 | 4.039821475 | 0.015 | 0     | 0.055690032 | CTRL    | Tubg2       | 0.015    |
| Rgs11       | 1.79339E-06 | 3.92774498  | 0.015 | 0     | 0.055690032 | CTRL    | Rgs11       | 0.015    |
| Podxl2      | 1.79339E-06 | 3.437193902 | 0.015 | 0     | 0.055690032 | CTRL    | Podxl2      | 0.015    |
| Nphp3       | 1.79339E-06 | 3.141339235 | 0.015 | 0     | 0.055690032 | CTRL    | Nphp3       | 0.015    |
| Palm        | 1.80257E-06 | 3.705997535 | 0.02  | 0.001 | 0.055975165 | CTRL    | Palm        | 0.019    |
| Ero1l       | 3.14982E-06 | 1.465911226 | 0.141 | 0.056 | 0.097811225 | CTRL    | Ero1l       | 0.085    |
| Gpi1        | 4.05878E-06 | 0.787795926 | 0.429 | 0.291 | 0.126037367 | CTRL    | Gpi1        | 0.138    |
| Txnip       | 4.34731E-06 | 1.627990266 | 0.217 | 0.111 | 0.134997146 | CTRL    | Txnip       | 0.106    |
| Bsg         | 4.78391E-06 | 0.871000445 | 0.369 | 0.236 | 0.148554886 | CTRL    | Bsg         | 0.133    |
| Tyrp1       | 6.56664E-06 | 0.831732236 | 0.323 | 0.195 | 0.203913923 | CTRL    | Tyrp1       | 0.128    |
| Trim13      | 6.64526E-06 | 2.661193432 | 0.045 | 0.008 | 0.206355129 | CTRL    | Trim13      | 0.037    |
| Gnb4        | 7.00554E-06 | 2.599366192 | 0.035 | 0.005 | 0.217543064 | CTRL    | Gnb4        | 0.03     |
| Tra2b       | 7.91715E-06 | 0.986732631 | 0.343 | 0.219 | 0.24585128  | CTRL    | Tra2b       | 0.124    |
| Ngrn        | 1.46639E-05 | 2.78258046  | 0.045 | 0.009 | 0.455356859 | CTRL    | Ngrn        | 0.036    |
| Fahd1       | 2.53866E-05 | 3.164752786 | 0.02  | 0.001 | 0.788329507 | CTRL    | Fahd1       | 0.019    |
| Got1        | 3.08916E-05 | 1.11648114  | 0.172 | 0.081 | 0.959275572 | CTRL    | Got1        | 0.091    |
| Fkbp6       | 3.45957E-05 | 2.383642242 | 0.061 | 0.016 | 1           | CTRL    | Fkbp6       | 0.045    |
| Cirbp       | 6.73917E-05 | 1.041543127 | 0.308 | 0.2   | 1           | CTRL    | Cirbp       | 0.108    |
| Lhpp        | 7.5574E-05  | 3.226994175 | 0.015 | 0.001 | 1           | CTRL    | Lhpp        | 0.014    |
| Erbp3       | 7.61563E-05 | 3.470944952 | 0.015 | 0.001 | 1           | CTRL    | Erbp3       | 0.014    |
| Arl11       | 7.73336E-05 | 3.195790113 | 0.015 | 0.001 | 1           | CTRL    | Arl11       | 0.014    |
| Thap3       | 8.21745E-05 | 1.722475023 | 0.096 | 0.037 | 1           | CTRL    | Thap3       | 0.059    |
| 3110062M04f | 9.48734E-05 | 2.832265461 | 0.03  | 0.005 | 1           | CTRL    | 3110062M04f | 0.025    |
| Tubb3       | 9.48734E-05 | 2.733470535 | 0.03  | 0.005 | 1           | CTRL    | Tubb3       | 0.025    |
| Xpo5        | 9.71785E-05 | 3.899439474 | 0.01  | 0     | 1           | CTRL    | Xpo5        | 0.01     |
| Fmo5        | 9.71785E-05 | 3.831212019 | 0.01  | 0     | 1           | CTRL    | Fmo5        | 0.01     |
| Lrrn4cl     | 9.71785E-05 | 3.340065407 | 0.01  | 0     | 1           | CTRL    | Lrrn4cl     | 0.01     |

|          |             |             |       |       |        |          |       |
|----------|-------------|-------------|-------|-------|--------|----------|-------|
| Lipt2    | 9.71785E-05 | 3.246995738 | 0.01  | 0     | 1 CTRL | Lipt2    | 0.01  |
| Trbv16   | 9.71785E-05 | 3.233768078 | 0.01  | 0     | 1 CTRL | Trbv16   | 0.01  |
| Rab17    | 9.71785E-05 | 3.180771668 | 0.01  | 0     | 1 CTRL | Rab17    | 0.01  |
| Fsd2     | 9.71785E-05 | 3.131520971 | 0.01  | 0     | 1 CTRL | Fsd2     | 0.01  |
| Adamtsl4 | 9.71785E-05 | 3.059230086 | 0.01  | 0     | 1 CTRL | Adamtsl4 | 0.01  |
| Gm26522  | 9.71785E-05 | 2.848392413 | 0.01  | 0     | 1 CTRL | Gm26522  | 0.01  |
| Clca3a1  | 9.71785E-05 | 2.723185398 | 0.01  | 0     | 1 CTRL | Clca3a1  | 0.01  |
| Gm16861  | 9.71785E-05 | 2.158448926 | 0.01  | 0     | 1 CTRL | Gm16861  | 0.01  |
| Zfp280d  | 0.000112808 | 1.72379177  | 0.066 | 0.02  | 1 CTRL | Zfp280d  | 0.046 |
| Etfbkmt  | 0.000163481 | 3.460326154 | 0.02  | 0.002 | 1 CTRL | Etfbkmt  | 0.018 |
| Zc3h8    | 0.000171857 | 2.500647801 | 0.02  | 0.002 | 1 CTRL | Zc3h8    | 0.018 |
| Pax3     | 0.00021465  | 2.269682953 | 0.045 | 0.011 | 1 CTRL | Pax3     | 0.034 |
| Rbm48    | 0.000227559 | 1.9487013   | 0.045 | 0.011 | 1 CTRL | Rbm48    | 0.034 |
| Tmem106b | 0.000240834 | 1.368553535 | 0.111 | 0.049 | 1 CTRL | Tmem106b | 0.062 |
| Mast4    | 0.00025105  | 2.510177828 | 0.03  | 0.005 | 1 CTRL | Mast4    | 0.025 |
| Preli2   | 0.000266226 | 2.095761124 | 0.04  | 0.009 | 1 CTRL | Preli2   | 0.031 |
| Tpx2     | 0.000273259 | 2.534009468 | 0.035 | 0.007 | 1 CTRL | Tpx2     | 0.028 |
| Uqcrq    | 0.00028568  | 0.792525439 | 0.379 | 0.274 | 1 CTRL | Uqcrq    | 0.105 |
| Chd6     | 0.000294525 | 1.323322732 | 0.111 | 0.049 | 1 CTRL | Chd6     | 0.062 |
| Tmem222  | 0.000315423 | 1.745194941 | 0.081 | 0.031 | 1 CTRL | Tmem222  | 0.05  |
| Iqcc     | 0.000443522 | 2.485494149 | 0.025 | 0.004 | 1 CTRL | Iqcc     | 0.021 |
| Snrpd1   | 0.00044503  | 1.071784652 | 0.177 | 0.099 | 1 CTRL | Snrpd1   | 0.078 |
| Als2     | 0.000462385 | 1.940447387 | 0.025 | 0.004 | 1 CTRL | Als2     | 0.021 |
| Pebp1    | 0.00053134  | 0.734049966 | 0.298 | 0.205 | 1 CTRL | Pebp1    | 0.093 |
| Srrm1    | 0.000554604 | 0.884631233 | 0.197 | 0.115 | 1 CTRL | Srrm1    | 0.082 |
| Phlda3   | 0.000575163 | 2.038218959 | 0.03  | 0.006 | 1 CTRL | Phlda3   | 0.024 |
| Nudt19   | 0.000595652 | 1.564844514 | 0.071 | 0.026 | 1 CTRL | Nudt19   | 0.045 |
| Hist1h1c | 0.000596049 | 1.840668713 | 0.076 | 0.029 | 1 CTRL | Hist1h1c | 0.047 |
| Timm8b   | 0.000598526 | 1.382693997 | 0.116 | 0.055 | 1 CTRL | Timm8b   | 0.061 |
| Ckap5    | 0.000639189 | 1.499090537 | 0.071 | 0.026 | 1 CTRL | Ckap5    | 0.045 |
| Spsb2    | 0.000673935 | 3.083518065 | 0.02  | 0.003 | 1 CTRL | Spsb2    | 0.017 |
| Dhodh    | 0.000680364 | 2.787795195 | 0.02  | 0.003 | 1 CTRL | Dhodh    | 0.017 |
| Cdh19    | 0.000696687 | 2.530240818 | 0.02  | 0.003 | 1 CTRL | Cdh19    | 0.017 |
| F3       | 0.000699994 | 2.387561398 | 0.02  | 0.003 | 1 CTRL | F3       | 0.017 |
| Aplf     | 0.000706654 | 2.240707086 | 0.02  | 0.003 | 1 CTRL | Aplf     | 0.017 |
| Coro2b   | 0.000721682 | 3.510532142 | 0.015 | 0.001 | 1 CTRL | Coro2b   | 0.014 |
| Hoxa10   | 0.000721682 | 3.195161593 | 0.015 | 0.001 | 1 CTRL | Hoxa10   | 0.014 |
| Rmi2     | 0.000721682 | 3.144970526 | 0.015 | 0.001 | 1 CTRL | Rmi2     | 0.014 |
| Fez1     | 0.000726004 | 3.167282757 | 0.015 | 0.001 | 1 CTRL | Fez1     | 0.014 |
| Anp32b   | 0.000729976 | 0.772101243 | 0.364 | 0.271 | 1 CTRL | Anp32b   | 0.093 |
| Cdca5    | 0.00073035  | 2.839492055 | 0.015 | 0.001 | 1 CTRL | Cdca5    | 0.014 |
| Gm15614  | 0.000734721 | 2.620451139 | 0.015 | 0.001 | 1 CTRL | Gm15614  | 0.014 |
| Sardh    | 0.000734721 | 2.594627269 | 0.015 | 0.001 | 1 CTRL | Sardh    | 0.014 |
| Ptcra    | 0.000734721 | 2.532086464 | 0.015 | 0.001 | 1 CTRL | Ptcra    | 0.014 |
| Gen1     | 0.000734721 | 2.398076909 | 0.015 | 0.001 | 1 CTRL | Gen1     | 0.014 |
| Epha3    | 0.000734721 | 2.276765167 | 0.015 | 0.001 | 1 CTRL | Epha3    | 0.014 |
| Sco1     | 0.000747978 | 2.265776628 | 0.015 | 0.001 | 1 CTRL | Sco1     | 0.014 |
| Kcnip3   | 0.000754258 | 2.358577684 | 0.04  | 0.011 | 1 CTRL | Kcnip3   | 0.029 |
| Akt1s1   | 0.000799802 | 2.08644395  | 0.04  | 0.011 | 1 CTRL | Akt1s1   | 0.029 |
| Ddx1     | 0.000837889 | 1.604776294 | 0.076 | 0.03  | 1 CTRL | Ddx1     | 0.046 |
| Higd1a   | 0.000940068 | 0.873720244 | 0.298 | 0.215 | 1 CTRL | Higd1a   | 0.083 |
| Cdca3    | 0.000967776 | 1.980158561 | 0.051 | 0.016 | 1 CTRL | Cdca3    | 0.035 |

|             |             |             |       |       |        |             |       |
|-------------|-------------|-------------|-------|-------|--------|-------------|-------|
| Nudc        | 0.00096891  | 1.116517279 | 0.162 | 0.092 | 1 CTRL | Nudc        | 0.07  |
| Nt5c2       | 0.000993249 | 1.948716793 | 0.051 | 0.016 | 1 CTRL | Nt5c2       | 0.035 |
| Gmps        | 0.000999504 | 1.353970665 | 0.091 | 0.04  | 1 CTRL | Gmps        | 0.051 |
| Galk1       | 0.001045906 | 1.464220276 | 0.096 | 0.043 | 1 CTRL | Galk1       | 0.053 |
| Jun         | 0.00105182  | 1.244598837 | 0.146 | 0.08  | 1 CTRL | Jun         | 0.066 |
| Acad11      | 0.001074559 | 2.921510502 | 0.025 | 0.005 | 1 CTRL | Acad11      | 0.02  |
| Dnal4       | 0.001078598 | 3.124757179 | 0.025 | 0.005 | 1 CTRL | Dnal4       | 0.02  |
| Eif4ebp1    | 0.001108334 | 1.382938445 | 0.111 | 0.055 | 1 CTRL | Eif4ebp1    | 0.056 |
| Cenpk       | 0.001111422 | 2.328860267 | 0.025 | 0.005 | 1 CTRL | Cenpk       | 0.02  |
| Gnb5        | 0.001115589 | 2.276138542 | 0.025 | 0.005 | 1 CTRL | Gnb5        | 0.02  |
| Apol11b     | 0.001136643 | 3.428521363 | 0.025 | 0.005 | 1 CTRL | Apol11b     | 0.02  |
| Arhgap11a   | 0.001136643 | 2.123592592 | 0.025 | 0.005 | 1 CTRL | Arhgap11a   | 0.02  |
| Polr3h      | 0.00117267  | 2.193117965 | 0.03  | 0.007 | 1 CTRL | Polr3h      | 0.023 |
| Rnf126      | 0.001262465 | 1.331310147 | 0.076 | 0.031 | 1 CTRL | Rnf126      | 0.045 |
| Tubg1       | 0.001293405 | 2.062381171 | 0.04  | 0.011 | 1 CTRL | Tubg1       | 0.029 |
| Rapsn       | 0.001310146 | 1.909867964 | 0.04  | 0.011 | 1 CTRL | Rapsn       | 0.029 |
| Plagl1      | 0.001372082 | 1.717469153 | 0.04  | 0.011 | 1 CTRL | Plagl1      | 0.029 |
| Pex11b      | 0.001438738 | 2.020876878 | 0.045 | 0.014 | 1 CTRL | Pex11b      | 0.031 |
| Thumpd3     | 0.001503244 | 1.739355658 | 0.051 | 0.017 | 1 CTRL | Thumpd3     | 0.034 |
| Igfbp4      | 0.001529378 | 1.777756132 | 0.051 | 0.017 | 1 CTRL | Igfbp4      | 0.034 |
| Cul5        | 0.001561056 | 1.425257181 | 0.056 | 0.019 | 1 CTRL | Cul5        | 0.037 |
| Nifk        | 0.001586306 | 1.521240772 | 0.051 | 0.017 | 1 CTRL | Nifk        | 0.034 |
| Srebf2      | 0.001620804 | 1.372542387 | 0.101 | 0.049 | 1 CTRL | Srebf2      | 0.052 |
| Met         | 0.00174444  | 1.218243514 | 0.086 | 0.038 | 1 CTRL | Met         | 0.048 |
| Gstm5       | 0.001872403 | 1.634588951 | 0.035 | 0.009 | 1 CTRL | Gstm5       | 0.026 |
| Pigo        | 0.00189806  | 1.345214547 | 0.035 | 0.009 | 1 CTRL | Pigo        | 0.026 |
| Tuba1b      | 0.001908725 | 0.939490496 | 0.192 | 0.119 | 1 CTRL | Tuba1b      | 0.073 |
| Syde1       | 0.002025555 | 3.079678167 | 0.02  | 0.003 | 1 CTRL | Syde1       | 0.017 |
| Zfp617      | 0.002042304 | 2.830646052 | 0.02  | 0.003 | 1 CTRL | Zfp617      | 0.017 |
| Sgcb        | 0.002067666 | 2.318499127 | 0.02  | 0.003 | 1 CTRL | Sgcb        | 0.017 |
| Gsta4       | 0.002076184 | 2.706749498 | 0.02  | 0.003 | 1 CTRL | Gsta4       | 0.017 |
| Hist3h2ba   | 0.002192449 | 1.914217884 | 0.03  | 0.007 | 1 CTRL | Hist3h2ba   | 0.023 |
| Emc6        | 0.002222802 | 0.96757094  | 0.172 | 0.102 | 1 CTRL | Emc6        | 0.07  |
| Plxna1      | 0.002339107 | 2.69261756  | 0.025 | 0.005 | 1 CTRL | Plxna1      | 0.02  |
| Stambp      | 0.002403342 | 2.486822782 | 0.025 | 0.005 | 1 CTRL | Stambp      | 0.02  |
| Hspd1       | 0.002413832 | 0.831294882 | 0.253 | 0.175 | 1 CTRL | Hspd1       | 0.078 |
| Ptk2        | 0.002452573 | 2.050407021 | 0.025 | 0.005 | 1 CTRL | Ptk2        | 0.02  |
| Bod1        | 0.002720488 | 1.537472031 | 0.056 | 0.021 | 1 CTRL | Bod1        | 0.035 |
| Hacd1       | 0.002789613 | 2.054108912 | 0.035 | 0.01  | 1 CTRL | Hacd1       | 0.025 |
| Cul7        | 0.002840291 | 2.035777645 | 0.035 | 0.01  | 1 CTRL | Cul7        | 0.025 |
| Arpc5l      | 0.002917678 | 1.019453551 | 0.167 | 0.102 | 1 CTRL | Arpc5l      | 0.065 |
| Hist1h4m    | 0.002922565 | 3.599245979 | 0.01  | 0.001 | 1 CTRL | Hist1h4m    | 0.009 |
| Gm10457     | 0.002922565 | 3.55932328  | 0.01  | 0.001 | 1 CTRL | Gm10457     | 0.009 |
| Creb5       | 0.002922565 | 3.504403473 | 0.01  | 0.001 | 1 CTRL | Creb5       | 0.009 |
| Lonrf3      | 0.002922565 | 3.438431856 | 0.01  | 0.001 | 1 CTRL | Lonrf3      | 0.009 |
| Lrrc56      | 0.002922565 | 3.358999386 | 0.01  | 0.001 | 1 CTRL | Lrrc56      | 0.009 |
| Ribc1       | 0.002922565 | 3.323110926 | 0.01  | 0.001 | 1 CTRL | Ribc1       | 0.009 |
| 2610020C07R | 0.002922565 | 3.204224513 | 0.01  | 0.001 | 1 CTRL | 2610020C07R | 0.009 |
| Gm34086     | 0.002922565 | 3.078950075 | 0.01  | 0.001 | 1 CTRL | Gm34086     | 0.009 |
| Ap5b1       | 0.002922565 | 2.957773332 | 0.01  | 0.001 | 1 CTRL | Ap5b1       | 0.009 |
| Prkar2b     | 0.002922565 | 2.827484036 | 0.01  | 0.001 | 1 CTRL | Prkar2b     | 0.009 |
| Ankrd24     | 0.002922565 | 2.745693187 | 0.01  | 0.001 | 1 CTRL | Ankrd24     | 0.009 |

|             |             |             |       |       |        |             |       |
|-------------|-------------|-------------|-------|-------|--------|-------------|-------|
| Mogat1      | 0.002922565 | 2.726310123 | 0.01  | 0.001 | 1 CTRL | Mogat1      | 0.009 |
| Amotl2      | 0.002922565 | 2.651556631 | 0.01  | 0.001 | 1 CTRL | Amotl2      | 0.009 |
| B430306N03F | 0.002922565 | 2.400005337 | 0.01  | 0.001 | 1 CTRL | B430306N03F | 0.009 |
| Pigb        | 0.002922565 | 2.384940612 | 0.01  | 0.001 | 1 CTRL | Pigb        | 0.009 |
| Vwa3b       | 0.002942804 | 3.222139537 | 0.01  | 0.001 | 1 CTRL | Vwa3b       | 0.009 |
| Ptgis       | 0.002942804 | 3.157628837 | 0.01  | 0.001 | 1 CTRL | Ptgis       | 0.009 |
| Dync2li1    | 0.002942804 | 2.905547449 | 0.01  | 0.001 | 1 CTRL | Dync2li1    | 0.009 |
| G630030J09R | 0.002942804 | 2.780818201 | 0.01  | 0.001 | 1 CTRL | G630030J09R | 0.009 |
| Apol9a      | 0.002942804 | 2.702659921 | 0.01  | 0.001 | 1 CTRL | Apol9a      | 0.009 |
| Aqp11       | 0.002942804 | 2.660381309 | 0.01  | 0.001 | 1 CTRL | Aqp11       | 0.009 |
| Extl1       | 0.002942804 | 2.433544813 | 0.01  | 0.001 | 1 CTRL | Extl1       | 0.009 |
| Hmcn1       | 0.002942804 | 2.423632094 | 0.01  | 0.001 | 1 CTRL | Hmcn1       | 0.009 |
| Nthl1       | 0.002942804 | 2.126772598 | 0.01  | 0.001 | 1 CTRL | Nthl1       | 0.009 |
| Gm44752     | 0.002942804 | 1.943699651 | 0.01  | 0.001 | 1 CTRL | Gm44752     | 0.009 |
| Nr1d1       | 0.002963171 | 2.662758614 | 0.01  | 0.001 | 1 CTRL | Nr1d1       | 0.009 |
| Cacnb3      | 0.002963171 | 2.345386326 | 0.01  | 0.001 | 1 CTRL | Cacnb3      | 0.009 |
| Zfp870      | 0.002963171 | 2.269747501 | 0.01  | 0.001 | 1 CTRL | Zfp870      | 0.009 |
| Glcci1      | 0.002963171 | 2.133774388 | 0.01  | 0.001 | 1 CTRL | Glcci1      | 0.009 |
| Znhit3      | 0.002965446 | 2.02852421  | 0.04  | 0.013 | 1 CTRL | Znhit3      | 0.027 |
| Mynn        | 0.002997411 | 1.620697168 | 0.035 | 0.01  | 1 CTRL | Mynn        | 0.025 |
| Tmem242     | 0.003136695 | 1.74393141  | 0.045 | 0.015 | 1 CTRL | Tmem242     | 0.03  |
| Ak4         | 0.00326715  | 2.816816001 | 0.015 | 0.002 | 1 CTRL | Ak4         | 0.013 |
| Hs3st1      | 0.003282991 | 4.015556688 | 0.015 | 0.002 | 1 CTRL | Hs3st1      | 0.013 |
| Ctdspl      | 0.003282991 | 3.128745992 | 0.015 | 0.002 | 1 CTRL | Ctdspl      | 0.013 |
| Rpp38       | 0.003282991 | 2.890102819 | 0.015 | 0.002 | 1 CTRL | Rpp38       | 0.013 |
| Zfp946      | 0.003282991 | 2.811501053 | 0.015 | 0.002 | 1 CTRL | Zfp946      | 0.013 |
| Trpc1       | 0.003298903 | 2.720965091 | 0.015 | 0.002 | 1 CTRL | Trpc1       | 0.013 |
| Fuk         | 0.003298903 | 2.719792539 | 0.015 | 0.002 | 1 CTRL | Fuk         | 0.013 |
| Pimreg      | 0.003298903 | 2.604704375 | 0.015 | 0.002 | 1 CTRL | Pimreg      | 0.013 |
| Gorab       | 0.003298903 | 2.478819169 | 0.015 | 0.002 | 1 CTRL | Gorab       | 0.013 |
| Tln2        | 0.003314884 | 2.60295268  | 0.015 | 0.002 | 1 CTRL | Tln2        | 0.013 |
| Il2         | 0.003314884 | 2.575533786 | 0.015 | 0.002 | 1 CTRL | Il2         | 0.013 |
| Lgr4        | 0.003330936 | 2.227268159 | 0.015 | 0.002 | 1 CTRL | Lgr4        | 0.013 |
| Pik3ip1     | 0.003345461 | 1.36913739  | 0.045 | 0.015 | 1 CTRL | Pik3ip1     | 0.03  |
| Hspa1a      | 0.003348544 | 1.204932042 | 0.066 | 0.027 | 1 CTRL | Hspa1a      | 0.039 |
| Ninj1       | 0.003353237 | 0.932309515 | 0.121 | 0.065 | 1 CTRL | Ninj1       | 0.056 |
| Gna11       | 0.003493417 | 1.362408121 | 0.066 | 0.027 | 1 CTRL | Gna11       | 0.039 |
| Psmb2       | 0.00351776  | 0.709428967 | 0.242 | 0.167 | 1 CTRL | Psmb2       | 0.075 |
| Mlana       | 0.003592234 | 0.819134648 | 0.187 | 0.118 | 1 CTRL | Mlana       | 0.069 |
| Kif3a       | 0.003647924 | 2.399388955 | 0.03  | 0.008 | 1 CTRL | Kif3a       | 0.022 |
| 2700062C07R | 0.00374009  | 2.321897558 | 0.03  | 0.008 | 1 CTRL | 2700062C07R | 0.022 |
| Slc25a4     | 0.003753355 | 0.782131843 | 0.298 | 0.219 | 1 CTRL | Slc25a4     | 0.079 |
| 1110065P20R | 0.003785426 | 1.606206394 | 0.061 | 0.025 | 1 CTRL | 1110065P20R | 0.036 |
| Pphln1      | 0.003802703 | 2.056589721 | 0.03  | 0.008 | 1 CTRL | Pphln1      | 0.022 |
| 0610009O20F | 0.003802703 | 1.941915326 | 0.03  | 0.008 | 1 CTRL | 0610009O20F | 0.022 |
| Mrpl2       | 0.003854995 | 1.2577952   | 0.071 | 0.031 | 1 CTRL | Mrpl2       | 0.04  |
| 2410004B18R | 0.003894202 | 1.603058792 | 0.051 | 0.019 | 1 CTRL | 2410004B18R | 0.032 |
| Bbc3        | 0.00390155  | 1.54834124  | 0.066 | 0.028 | 1 CTRL | Bbc3        | 0.038 |
| Car14       | 0.004028005 | 2.13630118  | 0.045 | 0.016 | 1 CTRL | Car14       | 0.029 |
| Nosip       | 0.004040305 | 1.319895229 | 0.091 | 0.045 | 1 CTRL | Nosip       | 0.046 |
| Tinagl1     | 0.004234269 | 1.325825021 | 0.051 | 0.019 | 1 CTRL | Tinagl1     | 0.032 |
| Cpe         | 0.004255865 | 1.381498304 | 0.081 | 0.038 | 1 CTRL | Cpe         | 0.043 |

|             |             |             |       |       |        |             |       |
|-------------|-------------|-------------|-------|-------|--------|-------------|-------|
| Cdc20       | 0.004306681 | 2.046354456 | 0.035 | 0.011 | 1 CTRL | Cdc20       | 0.024 |
| Mrps26      | 0.004325968 | 0.985182688 | 0.131 | 0.074 | 1 CTRL | Mrps26      | 0.057 |
| Cyb5a       | 0.004369305 | 1.028156033 | 0.217 | 0.151 | 1 CTRL | Cyb5a       | 0.066 |
| Uqcrc2      | 0.004536391 | 1.040425108 | 0.182 | 0.118 | 1 CTRL | Uqcrc2      | 0.064 |
| Ndufa12     | 0.004543694 | 1.078090069 | 0.187 | 0.123 | 1 CTRL | Ndufa12     | 0.064 |
| Adck1       | 0.004613395 | 1.625173677 | 0.035 | 0.011 | 1 CTRL | Adck1       | 0.024 |
| Cebpb       | 0.004621446 | 0.742239999 | 0.308 | 0.227 | 1 CTRL | Cebpb       | 0.081 |
| Arrdc3      | 0.004635211 | 1.753704445 | 0.04  | 0.013 | 1 CTRL | Arrdc3      | 0.027 |
| Tti2        | 0.004642894 | 2.310397743 | 0.025 | 0.006 | 1 CTRL | Tti2        | 0.019 |
| Car9        | 0.004708628 | 1.578265196 | 0.035 | 0.011 | 1 CTRL | Car9        | 0.024 |
| Sap30bp     | 0.004776378 | 1.199176931 | 0.066 | 0.028 | 1 CTRL | Sap30bp     | 0.038 |
| Ptch1       | 0.004876901 | 2.520189516 | 0.02  | 0.004 | 1 CTRL | Ptch1       | 0.016 |
| Secisbp2    | 0.004887192 | 1.520904391 | 0.056 | 0.022 | 1 CTRL | Secisbp2    | 0.034 |
| 0610009B22R | 0.004930066 | 2.560244649 | 0.02  | 0.004 | 1 CTRL | 0610009B22R | 0.016 |
| Timeless    | 0.004930066 | 2.411030578 | 0.02  | 0.004 | 1 CTRL | Timeless    | 0.016 |
| Foxr2       | 0.004947904 | 2.356969863 | 0.02  | 0.004 | 1 CTRL | Foxr2       | 0.016 |
| Maml3       | 0.005001768 | 2.135475523 | 0.02  | 0.004 | 1 CTRL | Maml3       | 0.016 |
| Rbsn        | 0.005019841 | 2.006695408 | 0.02  | 0.004 | 1 CTRL | Rbsn        | 0.016 |
| Bud13       | 0.005056162 | 1.999565379 | 0.02  | 0.004 | 1 CTRL | Bud13       | 0.016 |
| Washc1      | 0.00506959  | 1.5279956   | 0.061 | 0.025 | 1 CTRL | Washc1      | 0.036 |
| Xxylt1      | 0.005148008 | 1.677998462 | 0.02  | 0.004 | 1 CTRL | Xxylt1      | 0.016 |
| Lamtor3     | 0.005159212 | 1.044208493 | 0.096 | 0.049 | 1 CTRL | Lamtor3     | 0.047 |
| Ruvbl1      | 0.005262967 | 1.183265247 | 0.101 | 0.053 | 1 CTRL | Ruvbl1      | 0.048 |
| Dtnbp1      | 0.005380421 | 1.388899843 | 0.106 | 0.058 | 1 CTRL | Dtnbp1      | 0.048 |
| Mrpl19      | 0.005399156 | 1.128082803 | 0.056 | 0.022 | 1 CTRL | Mrpl19      | 0.034 |
| Ube2f       | 0.0054764   | 1.450183818 | 0.091 | 0.047 | 1 CTRL | Ube2f       | 0.044 |
| Mpzl1       | 0.005645195 | 1.38273261  | 0.051 | 0.019 | 1 CTRL | Mpzl1       | 0.032 |
| Ndufs7      | 0.005777638 | 0.816373295 | 0.177 | 0.115 | 1 CTRL | Ndufs7      | 0.062 |
| Rap2b       | 0.006000055 | 1.559717744 | 0.056 | 0.023 | 1 CTRL | Rap2b       | 0.033 |
| Slc25a38    | 0.006180766 | 1.573601708 | 0.045 | 0.017 | 1 CTRL | Slc25a38    | 0.028 |
| AI467606    | 0.006188243 | 1.908180429 | 0.04  | 0.014 | 1 CTRL | AI467606    | 0.026 |
| Plrg1       | 0.00629796  | 2.060294994 | 0.035 | 0.011 | 1 CTRL | Plrg1       | 0.024 |
| Mtdh        | 0.006339686 | 0.838320963 | 0.192 | 0.126 | 1 CTRL | Mtdh        | 0.066 |
| Maip1       | 0.006491688 | 1.717508415 | 0.04  | 0.014 | 1 CTRL | Maip1       | 0.026 |
| Cnpy3       | 0.006498004 | 1.50780699  | 0.045 | 0.017 | 1 CTRL | Cnpy3       | 0.028 |
| Crls1       | 0.00651728  | 2.05287164  | 0.035 | 0.011 | 1 CTRL | Crls1       | 0.024 |
| Usp20       | 0.006547036 | 2.156370539 | 0.035 | 0.011 | 1 CTRL | Usp20       | 0.024 |
| Spc24       | 0.006614025 | 1.614416986 | 0.04  | 0.014 | 1 CTRL | Spc24       | 0.026 |
| Fez2        | 0.006652147 | 1.966174443 | 0.035 | 0.011 | 1 CTRL | Fez2        | 0.024 |
| Clasrp      | 0.006866931 | 1.65574924  | 0.035 | 0.011 | 1 CTRL | Clasrp      | 0.024 |
| Psma6       | 0.006887016 | 1.033283089 | 0.182 | 0.122 | 1 CTRL | Psma6       | 0.06  |
| Gys1        | 0.007000354 | 1.590753306 | 0.035 | 0.011 | 1 CTRL | Gys1        | 0.024 |
| Cd81        | 0.007029583 | 1.212652274 | 0.076 | 0.036 | 1 CTRL | Cd81        | 0.04  |
| Spc25       | 0.008103104 | 2.331194051 | 0.025 | 0.007 | 1 CTRL | Spc25       | 0.018 |
| Dars        | 0.008105609 | 1.363642332 | 0.056 | 0.023 | 1 CTRL | Dars        | 0.033 |
| Pdcd2l      | 0.008171684 | 2.192485727 | 0.025 | 0.007 | 1 CTRL | Pdcd2l      | 0.018 |
| Supv3l1     | 0.008194659 | 2.228061709 | 0.025 | 0.007 | 1 CTRL | Supv3l1     | 0.018 |
| Osgepl1     | 0.008217692 | 2.082203588 | 0.025 | 0.007 | 1 CTRL | Osgepl1     | 0.018 |
| Ndufb2      | 0.008284436 | 1.094223929 | 0.121 | 0.07  | 1 CTRL | Ndufb2      | 0.051 |
| Alg3        | 0.008287139 | 2.029448926 | 0.025 | 0.007 | 1 CTRL | Alg3        | 0.018 |
| Vps18       | 0.008380552 | 1.936700591 | 0.025 | 0.007 | 1 CTRL | Vps18       | 0.018 |
| Ppfia1      | 0.008460996 | 1.202329976 | 0.071 | 0.033 | 1 CTRL | Ppfia1      | 0.038 |

|           |             |             |       |       |                 |           |        |
|-----------|-------------|-------------|-------|-------|-----------------|-----------|--------|
| Toe1      | 0.008498641 | 1.852604351 | 0.025 | 0.007 | 1 CTRL          | Toe1      | 0.018  |
| Slc16a3   | 0.008939155 | 1.681623076 | 0.051 | 0.021 | 1 CTRL          | Slc16a3   | 0.03   |
| Sap30     | 0.009091858 | 1.520393143 | 0.051 | 0.021 | 1 CTRL          | Sap30     | 0.03   |
| Fam213a   | 0.009146961 | 1.170815359 | 0.045 | 0.017 | 1 CTRL          | Fam213a   | 0.028  |
| H1f0      | 0.009152587 | 1.523153077 | 0.066 | 0.031 | 1 CTRL          | H1f0      | 0.035  |
| Dtymk     | 0.009197961 | 1.025493995 | 0.091 | 0.048 | 1 CTRL          | Dtymk     | 0.043  |
| Pf4       | 0.009220199 | 1.813432694 | 0.01  | 0.052 | 1 CTRL          | Pf4       | -0.042 |
| Naa16     | 0.009268602 | 1.57682553  | 0.04  | 0.015 | 1 CTRL          | Naa16     | 0.025  |
| Fam98b    | 0.009268602 | 1.367277494 | 0.04  | 0.015 | 1 CTRL          | Fam98b    | 0.025  |
| Fdps      | 0.009293614 | 1.305005815 | 0.076 | 0.037 | 1 CTRL          | Fdps      | 0.039  |
| Arrdc1    | 0.009369727 | 1.01586926  | 0.091 | 0.048 | 1 CTRL          | Arrdc1    | 0.043  |
| Cst6      | 0.009397064 | 1.46709512  | 0.04  | 0.015 | 1 CTRL          | Cst6      | 0.025  |
| Ado       | 0.009444004 | 2.155986835 | 0.03  | 0.009 | 1 CTRL          | Ado       | 0.021  |
| Eefsec    | 0.009536854 | 1.959094311 | 0.035 | 0.012 | 1 CTRL          | Eefsec    | 0.023  |
| Mapk3     | 0.00957013  | 1.110439123 | 0.081 | 0.041 | 1 CTRL          | Mapk3     | 0.04   |
| Gon7      | 0.009602144 | 1.388577211 | 0.04  | 0.015 | 1 CTRL          | Gon7      | 0.025  |
| Vps45     | 0.009603733 | 1.826866397 | 0.03  | 0.009 | 1 CTRL          | Vps45     | 0.021  |
| Cetn4     | 0.009633216 | 2.936727625 | 0.015 | 0.003 | 1 CTRL          | Cetn4     | 0.012  |
| Tnfrsf13b | 0.009633216 | 2.795243348 | 0.015 | 0.003 | 1 CTRL          | Tnfrsf13b | 0.012  |
| Dhx30     | 0.009639857 | 1.344454395 | 0.04  | 0.015 | 1 CTRL          | Dhx30     | 0.025  |
| Fkbp7     | 0.009672102 | 2.423737912 | 0.015 | 0.003 | 1 CTRL          | Fkbp7     | 0.012  |
| Trim21    | 0.009711129 | 2.423027054 | 0.015 | 0.003 | 1 CTRL          | Trim21    | 0.012  |
| Tmco3     | 0.009719296 | 1.852480729 | 0.03  | 0.009 | 1 CTRL          | Tmco3     | 0.021  |
| Gypa      | 0.009719296 | 1.84941437  | 0.03  | 0.009 | 1 CTRL          | Gypa      | 0.021  |
| Zfp110    | 0.009743472 | 1.755666515 | 0.035 | 0.012 | 1 CTRL          | Zfp110    | 0.023  |
| Gm42047   | 0.009750296 | 2.501784352 | 0.015 | 0.003 | 1 CTRL          | Gm42047   | 0.012  |
| Trf       | 0.009774994 | 1.355582711 | 0.061 | 0.027 | 1 CTRL          | Trf       | 0.034  |
| Gm26669   | 0.009789603 | 2.380502581 | 0.015 | 0.003 | 1 CTRL          | Gm26669   | 0.012  |
| Hao       | 0.009789603 | 2.326780006 | 0.015 | 0.003 | 1 CTRL          | Hao       | 0.012  |
| Gdpd1     | 0.009789603 | 2.13257324  | 0.015 | 0.003 | 1 CTRL          | Gdpd1     | 0.012  |
| Dmxl2     | 0.009789603 | 2.12403515  | 0.015 | 0.003 | 1 CTRL          | Dmxl2     | 0.012  |
| Tpcn2     | 0.009829052 | 2.303946116 | 0.015 | 0.003 | 1 CTRL          | Tpcn2     | 0.012  |
| Ctsf      | 0.009829052 | 2.291386511 | 0.015 | 0.003 | 1 CTRL          | Ctsf      | 0.012  |
| Ccdc138   | 0.009868642 | 2.033823917 | 0.015 | 0.003 | 1 CTRL          | Ccdc138   | 0.012  |
| Pter      | 0.009868642 | 1.892433488 | 0.015 | 0.003 | 1 CTRL          | Pter      | 0.012  |
| Foxp3     | 0.009908374 | 2.197439735 | 0.015 | 0.003 | 1 CTRL          | Foxp3     | 0.012  |
| Neil2     | 0.009908374 | 2.008160059 | 0.015 | 0.003 | 1 CTRL          | Neil2     | 0.012  |
| Npri3     | 0.009908374 | 1.772342512 | 0.015 | 0.003 | 1 CTRL          | Npri3     | 0.012  |
| Parvb     | 0.009956549 | 2.736181922 | 0.02  | 0.005 | 1 CTRL          | Parvb     | 0.015  |
| Cd52      | 4.68111E-14 | 0.802224012 | 0.828 | 0.631 | 1.45362E-09 M28 | Cd52      | 0.197  |
| Il2rb     | 2.68531E-09 | 0.866340239 | 0.6   | 0.374 | 8.33869E-05 M28 | Il2rb     | 0.226  |
| AW112010  | 5.56696E-09 | 0.876987696 | 0.781 | 0.677 | 0.000172871 M28 | AW112010  | 0.104  |
| Nr4a3     | 6.26323E-08 | 1.522507428 | 0.326 | 0.141 | 0.00194492 M28  | Nr4a3     | 0.185  |
| Lyz2      | 6.50878E-08 | 1.924972976 | 0.233 | 0.066 | 0.002021171 M28 | Lyz2      | 0.167  |
| Tyrobp    | 1.27161E-07 | 1.180711567 | 0.434 | 0.253 | 0.003948735 M28 | Tyrobp    | 0.181  |
| S100a6    | 9.97586E-07 | 0.723781168 | 0.545 | 0.348 | 0.030978038 M28 | S100a6    | 0.197  |
| Mxd1      | 1.86083E-06 | 1.64209281  | 0.227 | 0.081 | 0.057784234 M28 | Mxd1      | 0.146  |
| Kdm6b     | 3.655E-06   | 1.089892178 | 0.302 | 0.136 | 0.11349874 M28  | Kdm6b     | 0.166  |
| Cxcl2     | 6.96724E-06 | 1.820508742 | 0.191 | 0.061 | 0.216353561 M28 | Cxcl2     | 0.13   |
| Gzma      | 8.92845E-06 | 1.027233783 | 0.412 | 0.258 | 0.277255194 M28 | Gzma      | 0.154  |
| Ppp1r16b  | 1.56347E-05 | 2.017113813 | 0.172 | 0.056 | 0.485502939 M28 | Ppp1r16b  | 0.116  |
| Cd74      | 2.53081E-05 | 1.389605973 | 0.167 | 0.051 | 0.785890959 M28 | Cd74      | 0.116  |

|            |             |             |       |       |             |     |            |        |
|------------|-------------|-------------|-------|-------|-------------|-----|------------|--------|
| Irf8       | 2.93241E-05 | 1.13615093  | 0.311 | 0.172 | 0.910601901 | M28 | Irf8       | 0.139  |
| Nop53      | 3.16662E-05 | 1.005679216 | 0.276 | 0.136 | 0.98333018  | M28 | Nop53      | 0.14   |
| Nr4a2      | 4.75902E-05 | 0.75102209  | 0.309 | 0.162 | 1           | M28 | Nr4a2      | 0.147  |
| Gls        | 6.11864E-05 | 1.287357939 | 0.213 | 0.091 | 1           | M28 | Gls        | 0.122  |
| Tgfb1      | 7.43113E-05 | 0.81826911  | 0.285 | 0.146 | 1           | M28 | Tgfb1      | 0.139  |
| Klra9      | 8.70059E-05 | 1.491019884 | 0.156 | 0.051 | 1           | M28 | Klra9      | 0.105  |
| Tgif1      | 0.000119805 | 0.905955244 | 0.253 | 0.126 | 1           | M28 | Tgif1      | 0.127  |
| Klra7      | 0.00018697  | 1.090529173 | 0.199 | 0.086 | 1           | M28 | Klra7      | 0.113  |
| H2-Ab1     | 0.000203043 | 2.496842966 | 0.094 | 0.015 | 1           | M28 | H2-Ab1     | 0.079  |
| Satb1      | 0.000248623 | 0.768839517 | 0.326 | 0.192 | 1           | M28 | Satb1      | 0.134  |
| Nup210     | 0.000261387 | 1.624825315 | 0.144 | 0.051 | 1           | M28 | Nup210     | 0.093  |
| Hbb-bs     | 0.00029408  | 0.773377321 | 0.896 | 0.929 | 1           | M28 | Hbb-bs     | -0.033 |
| Saa3       | 0.000350024 | 6.307068689 | 0.061 | 0     | 1           | M28 | Saa3       | 0.061  |
| Msn        | 0.00050533  | 0.736636405 | 0.3   | 0.172 | 1           | M28 | Msn        | 0.128  |
| Cetn2      | 0.000642217 | 2.14116731  | 0.092 | 0.02  | 1           | M28 | Cetn2      | 0.072  |
| Nfatc1     | 0.000663294 | 1.150625814 | 0.13  | 0.045 | 1           | M28 | Nfatc1     | 0.085  |
| Samsn1     | 0.000791398 | 0.878288456 | 0.198 | 0.096 | 1           | M28 | Samsn1     | 0.102  |
| Mat2a      | 0.000794728 | 0.78489603  | 0.195 | 0.091 | 1           | M28 | Mat2a      | 0.104  |
| Mknk2      | 0.000824727 | 0.814189864 | 0.293 | 0.177 | 1           | M28 | Mknk2      | 0.116  |
| Ppp3ca     | 0.000864291 | 1.919809641 | 0.097 | 0.025 | 1           | M28 | Ppp3ca     | 0.072  |
| Heca       | 0.000955849 | 1.271796529 | 0.114 | 0.035 | 1           | M28 | Heca       | 0.079  |
| Dot1l      | 0.000971714 | 1.246147555 | 0.097 | 0.025 | 1           | M28 | Dot1l      | 0.072  |
| Klra1      | 0.000997038 | 1.979354512 | 0.096 | 0.025 | 1           | M28 | Klra1      | 0.071  |
| Ly6c2      | 0.001150021 | 0.83644374  | 0.216 | 0.111 | 1           | M28 | Ly6c2      | 0.105  |
| Adcy7      | 0.001165325 | 2.013788437 | 0.094 | 0.025 | 1           | M28 | Adcy7      | 0.069  |
| H2-Eb1     | 0.001212223 | 2.870879501 | 0.069 | 0.01  | 1           | M28 | H2-Eb1     | 0.059  |
| Mycbp2     | 0.00126247  | 0.95650362  | 0.172 | 0.081 | 1           | M28 | Mycbp2     | 0.091  |
| Rc3h1      | 0.001288751 | 2.457688409 | 0.077 | 0.015 | 1           | M28 | Rc3h1      | 0.062  |
| Xcl1       | 0.001384072 | 0.803131669 | 0.183 | 0.091 | 1           | M28 | Xcl1       | 0.092  |
| Psme2      | 0.001391652 | 0.871667321 | 0.239 | 0.136 | 1           | M28 | Psme2      | 0.103  |
| Thy1       | 0.001438288 | 0.847131444 | 0.227 | 0.126 | 1           | M28 | Thy1       | 0.101  |
| S100a13    | 0.001597147 | 0.85069688  | 0.247 | 0.146 | 1           | M28 | S100a13    | 0.101  |
| Nckap1l    | 0.001609131 | 2.413361088 | 0.075 | 0.015 | 1           | M28 | Nckap1l    | 0.06   |
| Cdk17      | 0.001833612 | 2.655970031 | 0.066 | 0.01  | 1           | M28 | Cdk17      | 0.056  |
| Anxa1      | 0.001935041 | 1.501265997 | 0.098 | 0.03  | 1           | M28 | Anxa1      | 0.068  |
| Ccr2       | 0.002015403 | 1.254493033 | 0.14  | 0.061 | 1           | M28 | Ccr2       | 0.079  |
| Mcmbp      | 0.002105453 | 5.319871533 | 0.046 | 0     | 1           | M28 | Mcmbp      | 0.046  |
| Itga1      | 0.00221738  | 2.735832905 | 0.064 | 0.01  | 1           | M28 | Itga1      | 0.054  |
| Sptbn1     | 0.002427549 | 1.067768591 | 0.14  | 0.061 | 1           | M28 | Sptbn1     | 0.079  |
| Runx3      | 0.002437814 | 0.716055022 | 0.244 | 0.141 | 1           | M28 | Runx3      | 0.103  |
| D16Ert472e | 0.0029012   | 0.929060111 | 0.177 | 0.091 | 1           | M28 | D16Ert472e | 0.086  |
| Lasp1      | 0.003028376 | 1.315083818 | 0.102 | 0.035 | 1           | M28 | Lasp1      | 0.067  |
| Cxcr4      | 0.003456046 | 0.730981103 | 0.257 | 0.157 | 1           | M28 | Cxcr4      | 0.1    |
| Col3a1     | 0.003629286 | 5.352194521 | 0.041 | 0     | 1           | M28 | Col3a1     | 0.041  |
| Itgam      | 0.003922957 | 5.205714499 | 0.041 | 0     | 1           | M28 | Itgam      | 0.041  |
| Xrn1       | 0.004060814 | 1.544406676 | 0.076 | 0.02  | 1           | M28 | Xrn1       | 0.056  |
| Elk4       | 0.004347222 | 2.269619305 | 0.074 | 0.02  | 1           | M28 | Elk4       | 0.054  |
| Khdrbs1    | 0.004633736 | 0.967502822 | 0.12  | 0.051 | 1           | M28 | Khdrbs1    | 0.069  |
| Serp1      | 0.004684725 | 0.746385192 | 0.18  | 0.096 | 1           | M28 | Serp1      | 0.084  |
| Trappc3    | 0.004691595 | 1.853939445 | 0.049 | 0.005 | 1           | M28 | Trappc3    | 0.044  |
| Nr4a1      | 0.004836115 | 0.742719985 | 0.223 | 0.131 | 1           | M28 | Nr4a1      | 0.092  |
| Tapbp      | 0.00511593  | 0.78495719  | 0.227 | 0.136 | 1           | M28 | Tapbp      | 0.091  |

|              |             |             |       |       |       |              |       |
|--------------|-------------|-------------|-------|-------|-------|--------------|-------|
| Rnf149       | 0.005265073 | 1.426479974 | 0.095 | 0.035 | 1 M28 | Rnf149       | 0.06  |
| Sh2b1        | 0.005283322 | 1.744198361 | 0.073 | 0.02  | 1 M28 | Sh2b1        | 0.053 |
| Acaa2        | 0.005434045 | 2.21167207  | 0.048 | 0.005 | 1 M28 | Acaa2        | 0.043 |
| Tob1         | 0.005454143 | 1.283269367 | 0.081 | 0.025 | 1 M28 | Tob1         | 0.056 |
| Stim1        | 0.005713761 | 1.166816921 | 0.074 | 0.02  | 1 M28 | Stim1        | 0.054 |
| Pgm2l1       | 0.005841039 | 1.324713757 | 0.073 | 0.02  | 1 M28 | Pgm2l1       | 0.053 |
| Caprin1      | 0.005854636 | 1.38036353  | 0.101 | 0.04  | 1 M28 | Caprin1      | 0.061 |
| Taok3        | 0.006107378 | 1.974744595 | 0.056 | 0.01  | 1 M28 | Taok3        | 0.046 |
| Drap1        | 0.006333306 | 0.733059373 | 0.164 | 0.086 | 1 M28 | Drap1        | 0.078 |
| Stk38        | 0.006342942 | 1.059200163 | 0.095 | 0.035 | 1 M28 | Stk38        | 0.06  |
| Jak2         | 0.006419208 | 1.386971039 | 0.08  | 0.025 | 1 M28 | Jak2         | 0.055 |
| Map4k2       | 0.006536458 | 1.800861991 | 0.063 | 0.015 | 1 M28 | Map4k2       | 0.048 |
| Rnf145       | 0.006895201 | 1.521294807 | 0.063 | 0.015 | 1 M28 | Rnf145       | 0.048 |
| Spp1         | 0.007040444 | 1.918680946 | 0.085 | 0.03  | 1 M28 | Spp1         | 0.055 |
| Creb1        | 0.007162842 | 0.947659469 | 0.128 | 0.061 | 1 M28 | Creb1        | 0.067 |
| 9930111J21Ri | 0.007626693 | 1.544151744 | 0.077 | 0.025 | 1 M28 | 9930111J21Ri | 0.052 |
| Stag2        | 0.008125761 | 1.32655617  | 0.092 | 0.035 | 1 M28 | Stag2        | 0.057 |
| Cap1         | 0.008164663 | 0.984717739 | 0.138 | 0.071 | 1 M28 | Cap1         | 0.067 |
| Pkp3         | 0.008235394 | 1.347095408 | 0.091 | 0.035 | 1 M28 | Pkp3         | 0.056 |
| Klra8        | 0.008273593 | 1.189889704 | 0.15  | 0.081 | 1 M28 | Klra8        | 0.069 |
| Rock1        | 0.008279725 | 0.705616101 | 0.203 | 0.121 | 1 M28 | Rock1        | 0.082 |
| Rnaseh2c     | 0.008331992 | 0.760828516 | 0.135 | 0.066 | 1 M28 | Rnaseh2c     | 0.069 |
| Nfat5        | 0.008485125 | 0.897077098 | 0.107 | 0.045 | 1 M28 | Nfat5        | 0.062 |
| Gm19585      | 0.008497415 | 0.783728928 | 0.115 | 0.051 | 1 M28 | Gm19585      | 0.064 |
| Rela         | 0.008597953 | 1.690240258 | 0.068 | 0.02  | 1 M28 | Rela         | 0.048 |
| Ndfip2       | 0.008966902 | 1.333223582 | 0.097 | 0.04  | 1 M28 | Ndfip2       | 0.057 |
| Hexim1       | 0.008969594 | 0.798430996 | 0.154 | 0.081 | 1 M28 | Hexim1       | 0.073 |
| Pan3         | 0.009073268 | 1.254653022 | 0.09  | 0.035 | 1 M28 | Pan3         | 0.055 |
| Ppp1r2       | 0.009075725 | 1.556799232 | 0.082 | 0.03  | 1 M28 | Ppp1r2       | 0.052 |
| Rprd2        | 0.009120251 | 2.114427564 | 0.06  | 0.015 | 1 M28 | Rprd2        | 0.045 |
| Taf1         | 0.009125454 | 2.132584068 | 0.06  | 0.015 | 1 M28 | Taf1         | 0.045 |
| Chmp5        | 0.009159035 | 1.487684353 | 0.076 | 0.025 | 1 M28 | Chmp5        | 0.051 |
| Kdm2b        | 0.009247478 | 0.696264064 | 0.167 | 0.091 | 1 M28 | Kdm2b        | 0.076 |
| Npc1         | 0.009247908 | 4.755238104 | 0.033 | 0     | 1 M28 | Npc1         | 0.033 |
| Atp6v0a2     | 0.009322252 | 2.057171826 | 0.052 | 0.01  | 1 M28 | Atp6v0a2     | 0.042 |
| H2-Aa        | 0.009341089 | 2.02187509  | 0.06  | 0.015 | 1 M28 | H2-Aa        | 0.045 |
