# Supplementary material
Source: PubMed Central journal article supplement (PMC8940682)
Supplement: NIHMS1773905-supplement-21.pdf [file NIHMS1773905-supplement-21.pdf]

**Supplemental Table 9. Gene Expression Fold Change in CD8+ T cells of WT vs. RNL5 KO tumors**

| gene_name | p_val       | avg_log2FC  | pct.1 | pct.2 | p_val_adj   | cluster | gene     | pct.diff |
|-----------|-------------|-------------|-------|-------|-------------|---------|----------|----------|
| Hbb-bs    | 8.4362E-121 | 5.083993559 | 0.997 | 0.462 | 2.6197E-116 | WT      | Hbb-bs   | 0.535    |
| mt-Atp6   | 3.0121E-109 | 2.507671872 | 1     | 0.996 | 9.3536E-105 | WT      | mt-Atp6  | 0.004    |
| mt-Atp8   | 1.1959E-107 | 4.139498292 | 0.976 | 0.756 | 3.7138E-103 | WT      | mt-Atp8  | 0.22     |
| Hbb-bt    | 1.37539E-92 | 6.07777452  | 0.859 | 0.08  | 4.27099E-88 | WT      | Hbb-bt   | 0.779    |
| Hba-a1    | 2.00877E-90 | 5.65962381  | 0.863 | 0.092 | 6.23783E-86 | WT      | Hba-a1   | 0.771    |
| mt-Co2    | 3.49607E-87 | 1.757565581 | 1     | 0.996 | 1.08564E-82 | WT      | mt-Co2   | 0.004    |
| mt-Co3    | 6.93616E-87 | 1.804684112 | 1     | 1     | 2.15389E-82 | WT      | mt-Co3   | 0        |
| mt-Cytb   | 1.73651E-85 | 1.828159382 | 0.996 | 0.996 | 5.39239E-81 | WT      | mt-Cytb  | 0        |
| mt-Nd4l   | 5.58901E-81 | 3.152673815 | 0.923 | 0.748 | 1.73556E-76 | WT      | mt-Nd4l  | 0.175    |
| Hba-a2    | 3.56997E-77 | 5.592873547 | 0.8   | 0.122 | 1.10858E-72 | WT      | Hba-a2   | 0.678    |
| mt-Nd5    | 2.02559E-72 | 2.515004592 | 0.938 | 0.887 | 6.29006E-68 | WT      | mt-Nd5   | 0.051    |
| mt-Co1    | 2.95175E-72 | 1.208842918 | 1     | 1     | 9.16605E-68 | WT      | mt-Co1   | 0        |
| mt-Nd4    | 4.44854E-51 | 1.020853094 | 0.993 | 0.992 | 1.3814E-46  | WT      | mt-Nd4   | 0.001    |
| Ftl1      | 1.61365E-32 | 1.355346376 | 0.87  | 0.941 | 5.01086E-28 | WT      | Ftl1     | -0.071   |
| mt-Nd2    | 8.49848E-31 | 0.713435733 | 0.963 | 0.992 | 2.63903E-26 | WT      | mt-Nd2   | -0.029   |
| Gm26917   | 8.55318E-27 | 2.394149975 | 0.784 | 0.857 | 2.65602E-22 | WT      | Gm26917  | -0.073   |
| Fabp4     | 3.0312E-22  | 6.116369019 | 0.331 | 0.021 | 9.41279E-18 | WT      | Fabp4    | 0.31     |
| Sparc     | 5.74066E-16 | 4.515541769 | 0.321 | 0.08  | 1.78265E-11 | WT      | Sparc    | 0.241    |
| S100a8    | 4.06514E-15 | 8.599426145 | 0.216 | 0     | 1.26235E-10 | WT      | S100a8   | 0.216    |
| S100a9    | 5.09003E-15 | 8.340388813 | 0.221 | 0.004 | 1.58061E-10 | WT      | S100a9   | 0.217    |
| Dapk3     | 1.08603E-12 | 0.754159724 | 0.125 | 0.357 | 3.37246E-08 | WT      | Dapk3    | -0.232   |
| Alas2     | 4.14272E-12 | 4.626384136 | 0.202 | 0.017 | 1.28644E-07 | WT      | Alas2    | 0.185    |
| Bcl2      | 9.00779E-12 | 0.747545092 | 0.206 | 0.508 | 2.79719E-07 | WT      | Bcl2     | -0.302   |
| Rbm7      | 4.38286E-11 | 0.6937263   | 0.118 | 0.324 | 1.36101E-06 | WT      | Rbm7     | -0.206   |
| Dct       | 1.26374E-10 | 3.469348725 | 0.322 | 0.151 | 3.9243E-06  | WT      | Dct      | 0.171    |
| Atp11b    | 2.92697E-10 | 0.869001836 | 0.227 | 0.534 | 9.08913E-06 | WT      | Atp11b   | -0.307   |
| Kmt2c     | 3.52762E-10 | 0.741911039 | 0.091 | 0.261 | 1.09543E-05 | WT      | Kmt2c    | -0.17    |
| Mosmo     | 4.73163E-10 | 0.719335879 | 0.078 | 0.231 | 1.46931E-05 | WT      | Mosmo    | -0.153   |
| Pnrc2     | 1.00812E-09 | 0.78892836  | 0.062 | 0.197 | 3.1305E-05  | WT      | Pnrc2    | -0.135   |
| Cndp2     | 1.64355E-09 | 0.730953705 | 0.112 | 0.294 | 5.10372E-05 | WT      | Cndp2    | -0.182   |
| Cyb5r3    | 2.84543E-09 | 0.898085674 | 0.119 | 0.307 | 8.83591E-05 | WT      | Cyb5r3   | -0.188   |
| Alkbh6    | 2.93631E-09 | 0.744516453 | 0.079 | 0.227 | 9.11813E-05 | WT      | Alkbh6   | -0.148   |
| Apoe      | 3.59882E-09 | 2.273718671 | 0.454 | 0.366 | 0.000111754 | WT      | Apoe     | 0.088    |
| Terf1     | 3.6455E-09  | 0.738295766 | 0.088 | 0.244 | 0.000113204 | WT      | Terf1    | -0.156   |
| Tmem106b  | 7.63221E-09 | 1.101322194 | 0.131 | 0.324 | 0.000237003 | WT      | Tmem106b | -0.193   |
| Yipf6     | 8.39026E-09 | 0.900204602 | 0.082 | 0.227 | 0.000260543 | WT      | Yipf6    | -0.145   |
| H2afj     | 1.03478E-08 | 1.048364977 | 0.675 | 0.861 | 0.000321329 | WT      | H2afj    | -0.186   |
| Guf1      | 1.03578E-08 | 0.76231162  | 0.057 | 0.176 | 0.000321642 | WT      | Guf1     | -0.119   |
| Tpm1      | 1.09386E-08 | 0.762467088 | 0.1   | 0.261 | 0.000339677 | WT      | Tpm1     | -0.161   |
| Gimap6    | 1.38966E-08 | 0.70569541  | 0.264 | 0.576 | 0.000431532 | WT      | Gimap6   | -0.312   |
| Snca      | 1.51103E-08 | 5.105436139 | 0.13  | 0.004 | 0.000469219 | WT      | Snca     | 0.126    |
| Kctd2     | 1.97875E-08 | 0.778747406 | 0.056 | 0.172 | 0.00061446  | WT      | Kctd2    | -0.116   |
| Tubgcp3   | 2.4406E-08  | 0.823303233 | 0.062 | 0.185 | 0.000757881 | WT      | Tubgcp3  | -0.123   |
| Mtx1      | 2.90318E-08 | 0.702527208 | 0.107 | 0.269 | 0.000901524 | WT      | Mtx1     | -0.162   |
| Mtif3     | 3.9153E-08  | 0.760732055 | 0.027 | 0.109 | 0.001215818 | WT      | Mtif3    | -0.082   |
| Hvcn1     | 3.98462E-08 | 0.700746928 | 0.06  | 0.176 | 0.001237343 | WT      | Hvcn1    | -0.116   |
| Dexi      | 4.20004E-08 | 0.733680679 | 0.035 | 0.126 | 0.001304239 | WT      | Dexi     | -0.091   |
| Lonp1     | 4.62435E-08 | 0.740912667 | 0.113 | 0.277 | 0.001436001 | WT      | Lonp1    | -0.164   |
| Pcyt2     | 6.85853E-08 | 0.725977565 | 0.071 | 0.197 | 0.002129778 | WT      | Pcyt2    | -0.126   |

|          |             |             |       |       |             |    |          |        |
|----------|-------------|-------------|-------|-------|-------------|----|----------|--------|
| Fbxl5    | 7.602E-08   | 0.778786573 | 0.103 | 0.256 | 0.002360649 | WT | Fbxl5    | -0.153 |
| Grina    | 8.90945E-08 | 0.703801051 | 0.252 | 0.538 | 0.00276665  | WT | Grina    | -0.286 |
| Mt1      | 1.05249E-07 | 1.548424619 | 0.606 | 0.63  | 0.003268298 | WT | Mt1      | -0.024 |
| Cfl2     | 1.07596E-07 | 0.850967364 | 0.063 | 0.181 | 0.003341178 | WT | Cfl2     | -0.118 |
| Pias4    | 1.15156E-07 | 0.76996605  | 0.06  | 0.172 | 0.003575938 | WT | Pias4    | -0.112 |
| Cdkn2d   | 1.21211E-07 | 0.786660782 | 0.125 | 0.294 | 0.003763963 | WT | Cdkn2d   | -0.169 |
| Gmeb1    | 1.22835E-07 | 0.857965758 | 0.051 | 0.155 | 0.003814404 | WT | Gmeb1    | -0.104 |
| Ube2e3   | 1.50524E-07 | 0.813681414 | 0.08  | 0.21  | 0.004674215 | WT | Ube2e3   | -0.13  |
| Acta2    | 1.56441E-07 | 5.921891376 | 0.113 | 0.004 | 0.004857963 | WT | Acta2    | 0.109  |
| Amn1     | 1.73051E-07 | 0.694193976 | 0.079 | 0.206 | 0.005373768 | WT | Amn1     | -0.127 |
| Cyb5a    | 1.87628E-07 | 0.72606634  | 0.271 | 0.567 | 0.005826397 | WT | Cyb5a    | -0.296 |
| Ulk3     | 1.94308E-07 | 0.718728763 | 0.018 | 0.084 | 0.006033835 | WT | Ulk3     | -0.066 |
| Eif2b2   | 3.21664E-07 | 0.89701291  | 0.143 | 0.324 | 0.00998864  | WT | Eif2b2   | -0.181 |
| Fkbp5    | 3.41217E-07 | 0.861262547 | 0.11  | 0.261 | 0.010595826 | WT | Fkbp5    | -0.151 |
| Aspscr1  | 3.4863E-07  | 0.966546329 | 0.085 | 0.214 | 0.010826    | WT | Aspscr1  | -0.129 |
| Akr1b10  | 3.62978E-07 | 0.701030051 | 0.04  | 0.13  | 0.011271557 | WT | Akr1b10  | -0.09  |
| Smg9     | 3.97887E-07 | 0.730046015 | 0.062 | 0.172 | 0.012355585 | WT | Smg9     | -0.11  |
| Slc25a39 | 4.69951E-07 | 0.988607207 | 0.132 | 0.303 | 0.014593397 | WT | Slc25a39 | -0.171 |
| Mrpl1    | 4.71544E-07 | 0.743734135 | 0.067 | 0.181 | 0.01464285  | WT | Mrpl1    | -0.114 |
| Al837181 | 6.95382E-07 | 0.717189973 | 0.055 | 0.155 | 0.021593705 | WT | Al837181 | -0.1   |
| Pja2     | 7.87172E-07 | 0.802963681 | 0.044 | 0.134 | 0.024444048 | WT | Pja2     | -0.09  |
| Tmem192  | 7.9013E-07  | 0.830034311 | 0.138 | 0.311 | 0.024535906 | WT | Tmem192  | -0.173 |
| Rlf      | 8.10631E-07 | 0.867092046 | 0.138 | 0.307 | 0.025172522 | WT | Rlf      | -0.169 |
| Tigd2    | 8.5808E-07  | 0.733427575 | 0.115 | 0.265 | 0.026645945 | WT | Tigd2    | -0.15  |
| Ddit3    | 8.74621E-07 | 0.930195582 | 0.114 | 0.265 | 0.027159617 | WT | Ddit3    | -0.151 |
| BC005561 | 9.97848E-07 | 0.794858129 | 0.069 | 0.181 | 0.030986178 | WT | BC005561 | -0.112 |
| C1qb     | 1.13312E-06 | 3.583594183 | 0.21  | 0.088 | 0.035186644 | WT | C1qb     | 0.122  |
| Rhoc     | 1.19086E-06 | 0.739081792 | 0.081 | 0.202 | 0.036979775 | WT | Rhoc     | -0.121 |
| Slc25a1  | 1.22517E-06 | 0.941763231 | 0.067 | 0.176 | 0.038045168 | WT | Slc25a1  | -0.109 |
| Klf7     | 1.26053E-06 | 0.697338036 | 0.063 | 0.168 | 0.039143262 | WT | Klf7     | -0.105 |
| Spsb3    | 1.28937E-06 | 0.933065302 | 0.09  | 0.218 | 0.040038786 | WT | Spsb3    | -0.128 |
| Sap30bp  | 1.39745E-06 | 0.755598986 | 0.087 | 0.21  | 0.043395149 | WT | Sap30bp  | -0.123 |
| Fmc1     | 1.42955E-06 | 0.734638441 | 0.116 | 0.265 | 0.044391916 | WT | Fmc1     | -0.149 |
| Gng11    | 1.73546E-06 | 4.87467691  | 0.124 | 0.021 | 0.05389138  | WT | Gng11    | 0.103  |
| Nosip    | 1.83019E-06 | 1.02040972  | 0.112 | 0.256 | 0.056832791 | WT | Nosip    | -0.144 |
| Ipo11    | 1.95192E-06 | 0.87666296  | 0.046 | 0.134 | 0.060612953 | WT | Ipo11    | -0.088 |
| Dgcr6    | 2.136E-06   | 0.868406764 | 0.053 | 0.147 | 0.066329281 | WT | Dgcr6    | -0.094 |
| Zfp593   | 2.41719E-06 | 0.909906023 | 0.169 | 0.361 | 0.07506113  | WT | Zfp593   | -0.192 |
| Ncoa4    | 2.46738E-06 | 0.919256567 | 0.086 | 0.206 | 0.07661943  | WT | Ncoa4    | -0.12  |
| Igfbp3   | 2.5911E-06  | 5.70208757  | 0.087 | 0     | 0.080461524 | WT | Igfbp3   | 0.087  |
| Gm9493   | 2.60529E-06 | 0.748669044 | 0.061 | 0.16  | 0.080902123 | WT | Gm9493   | -0.099 |
| Cnep1r1  | 2.67209E-06 | 0.960817118 | 0.074 | 0.185 | 0.082976499 | WT | Cnep1r1  | -0.111 |
| Spout1   | 2.91451E-06 | 0.804203685 | 0.04  | 0.122 | 0.090504149 | WT | Spout1   | -0.082 |
| Laptm4a  | 3.11991E-06 | 0.860860546 | 0.181 | 0.374 | 0.096882474 | WT | Laptm4a  | -0.193 |
| Pop7     | 3.57619E-06 | 0.823903807 | 0.119 | 0.265 | 0.11105155  | WT | Pop7     | -0.146 |
| Sos1     | 3.64396E-06 | 0.836917629 | 0.037 | 0.113 | 0.113156044 | WT | Sos1     | -0.076 |
| Tmem19   | 3.79326E-06 | 0.700498006 | 0.052 | 0.143 | 0.117792123 | WT | Tmem19   | -0.091 |
| Nfe2l2   | 3.81768E-06 | 0.711016302 | 0.052 | 0.143 | 0.118550274 | WT | Nfe2l2   | -0.091 |
| Ankrd54  | 4.16385E-06 | 0.953435948 | 0.057 | 0.151 | 0.129299958 | WT | Ankrd54  | -0.094 |
| Mrpl22   | 4.22142E-06 | 0.697196226 | 0.101 | 0.231 | 0.131087616 | WT | Mrpl22   | -0.13  |
| Clpp     | 4.55245E-06 | 0.865198532 | 0.095 | 0.218 | 0.141367202 | WT | Clpp     | -0.123 |

|               |             |             |       |       |             |    |               |        |
|---------------|-------------|-------------|-------|-------|-------------|----|---------------|--------|
| Dnase2a       | 6.12374E-06 | 0.752670709 | 0.025 | 0.088 | 0.190160568 | WT | Dnase2a       | -0.063 |
| Hist1h4c      | 6.50016E-06 | 0.852397442 | 0.036 | 0.109 | 0.201849362 | WT | Hist1h4c      | -0.073 |
| Ramp1         | 6.58341E-06 | 0.766767976 | 0.115 | 0.252 | 0.204434616 | WT | Ramp1         | -0.137 |
| Tfpt          | 6.66525E-06 | 0.716025178 | 0.065 | 0.164 | 0.206975987 | WT | Tfpt          | -0.099 |
| Grpel2        | 6.80353E-06 | 0.943943692 | 0.042 | 0.122 | 0.211270063 | WT | Grpel2        | -0.08  |
| Mkrn1         | 6.84589E-06 | 1.140672652 | 0.347 | 0.71  | 0.21258529  | WT | Mkrn1         | -0.363 |
| Spg20         | 6.99189E-06 | 0.783277073 | 0.042 | 0.122 | 0.217119233 | WT | Spg20         | -0.08  |
| Vars2         | 7.38702E-06 | 0.79075947  | 0.034 | 0.105 | 0.229389175 | WT | Vars2         | -0.071 |
| Ptgds         | 7.72039E-06 | 2.692997438 | 0.185 | 0.076 | 0.239741178 | WT | Ptgds         | 0.109  |
| Tmem222       | 8.60739E-06 | 0.993891796 | 0.125 | 0.269 | 0.267285159 | WT | Tmem222       | -0.144 |
| Zbtb43        | 8.84112E-06 | 0.694059051 | 0.038 | 0.113 | 0.274543407 | WT | Zbtb43        | -0.075 |
| Urod          | 9.37673E-06 | 0.837058463 | 0.094 | 0.214 | 0.291175518 | WT | Urod          | -0.12  |
| Ifi209        | 9.48689E-06 | 0.86809807  | 0.03  | 0.097 | 0.294596491 | WT | Ifi209        | -0.067 |
| Smyd2         | 1.02738E-05 | 0.953975785 | 0.088 | 0.202 | 0.319033405 | WT | Smyd2         | -0.114 |
| Ap3m2         | 1.12118E-05 | 0.829621111 | 0.043 | 0.122 | 0.348158754 | WT | Ap3m2         | -0.079 |
| Bgn           | 1.22052E-05 | 4.069238517 | 0.098 | 0.013 | 0.379006871 | WT | Bgn           | 0.085  |
| Retnlg        | 1.32912E-05 | 6.720413326 | 0.075 | 0     | 0.412731148 | WT | Retnlg        | 0.075  |
| Tyrobp        | 1.43668E-05 | 2.44519216  | 0.179 | 0.071 | 0.446133645 | WT | Tyrobp        | 0.108  |
| Acp5          | 1.53846E-05 | 0.786490851 | 0.121 | 0.256 | 0.477738678 | WT | Acp5          | -0.135 |
| Chchd4        | 1.60444E-05 | 0.818388328 | 0.056 | 0.143 | 0.498226718 | WT | Chchd4        | -0.087 |
| Arl3          | 1.61011E-05 | 0.705372751 | 0.067 | 0.164 | 0.499987722 | WT | Arl3          | -0.097 |
| Mrpl30        | 1.6213E-05  | 0.709928331 | 0.292 | 0.58  | 0.503461319 | WT | Mrpl30        | -0.288 |
| Tpd52         | 1.71569E-05 | 0.959451698 | 0.07  | 0.168 | 0.532773363 | WT | Tpd52         | -0.098 |
| Enkd1         | 1.81262E-05 | 0.766906816 | 0.036 | 0.105 | 0.562871886 | WT | Enkd1         | -0.069 |
| Cbr1          | 1.86751E-05 | 0.740636086 | 0.027 | 0.088 | 0.579916965 | WT | Cbr1          | -0.061 |
| Polr2i        | 1.88837E-05 | 0.922238463 | 0.182 | 0.366 | 0.586394672 | WT | Polr2i        | -0.184 |
| 1810058I24Ril | 2.13439E-05 | 0.769253777 | 0.322 | 0.647 | 0.662792321 | WT | 1810058I24Ril | -0.325 |
| Pole3         | 2.14911E-05 | 0.759154307 | 0.128 | 0.269 | 0.667361721 | WT | Pole3         | -0.141 |
| Asb8          | 2.22703E-05 | 0.721405783 | 0.052 | 0.134 | 0.691558754 | WT | Asb8          | -0.082 |
| Galt          | 2.24342E-05 | 0.786881991 | 0.04  | 0.113 | 0.696648047 | WT | Galt          | -0.073 |
| Col4a1        | 2.25108E-05 | 4.60439364  | 0.1   | 0.017 | 0.699028786 | WT | Col4a1        | 0.083  |
| Hagh          | 2.31664E-05 | 0.944814601 | 0.097 | 0.214 | 0.719385361 | WT | Hagh          | -0.117 |
| Zkscan1       | 2.32457E-05 | 0.806136758 | 0.021 | 0.076 | 0.721848341 | WT | Zkscan1       | -0.055 |
| Zfp422        | 2.39266E-05 | 0.757779811 | 0.038 | 0.109 | 0.742992867 | WT | Zfp422        | -0.071 |
| Fam160b2      | 2.41451E-05 | 0.826945451 | 0.032 | 0.097 | 0.749776539 | WT | Fam160b2      | -0.065 |
| Insrr         | 2.46609E-05 | 0.935278173 | 0.019 | 0.071 | 0.765793945 | WT | Insrr         | -0.052 |
| C1qa          | 2.47138E-05 | 3.454961974 | 0.156 | 0.059 | 0.767436357 | WT | C1qa          | 0.097  |
| Nr2c2ap       | 2.6595E-05  | 0.979555752 | 0.084 | 0.189 | 0.825853829 | WT | Nr2c2ap       | -0.105 |
| Slamf6        | 2.67311E-05 | 0.799296525 | 0.067 | 0.16  | 0.830080298 | WT | Slamf6        | -0.093 |
| Dnajc4        | 2.86266E-05 | 0.745795463 | 0.043 | 0.118 | 0.888941819 | WT | Dnajc4        | -0.075 |
| Sit1          | 3.05362E-05 | 0.727007156 | 0.048 | 0.126 | 0.948240076 | WT | Sit1          | -0.078 |
| Gpihbp1       | 3.08097E-05 | 5.251863219 | 0.077 | 0.004 | 0.956732636 | WT | Gpihbp1       | 0.073  |
| Zfp275        | 3.14623E-05 | 0.90554691  | 0.028 | 0.088 | 0.976999043 | WT | Zfp275        | -0.06  |
| Patz1         | 3.23304E-05 | 0.806387296 | 0.041 | 0.113 | 1           | WT | Patz1         | -0.072 |
| Smim20        | 3.28303E-05 | 0.761776542 | 0.108 | 0.227 | 1           | WT | Smim20        | -0.119 |
| Bcat2         | 3.34654E-05 | 0.985482135 | 0.053 | 0.134 | 1           | WT | Bcat2         | -0.081 |
| Atr           | 3.70788E-05 | 0.817353038 | 0.119 | 0.248 | 1           | WT | Atr           | -0.129 |
| Eogt          | 3.88131E-05 | 1.063731849 | 0.033 | 0.097 | 1           | WT | Eogt          | -0.064 |
| St6galnac3    | 4.09969E-05 | 0.978453472 | 0.063 | 0.151 | 1           | WT | St6galnac3    | -0.088 |
| Nt5c2         | 4.11975E-05 | 0.825230893 | 0.044 | 0.118 | 1           | WT | Nt5c2         | -0.074 |
| Rpap3         | 4.27866E-05 | 0.871302415 | 0.059 | 0.143 | 1           | WT | Rpap3         | -0.084 |

|            |             |             |       |       |   |    |            |        |
|------------|-------------|-------------|-------|-------|---|----|------------|--------|
| Grn        | 4.39051E-05 | 1.112095557 | 0.169 | 0.336 | 1 | WT | Grn        | -0.167 |
| Phf19      | 4.43605E-05 | 0.780644253 | 0.013 | 0.055 | 1 | WT | Phf19      | -0.042 |
| Slc4a1     | 4.47287E-05 | 5.693845605 | 0.066 | 0     | 1 | WT | Slc4a1     | 0.066  |
| Al413582   | 4.81344E-05 | 0.70786121  | 0.091 | 0.197 | 1 | WT | Al413582   | -0.106 |
| Odf2l      | 5.08336E-05 | 0.752100382 | 0.029 | 0.088 | 1 | WT | Odf2l      | -0.059 |
| Ppp1r21    | 5.1768E-05  | 1.120172696 | 0.042 | 0.113 | 1 | WT | Ppp1r21    | -0.071 |
| Mtg2       | 5.23885E-05 | 0.747818468 | 0.036 | 0.101 | 1 | WT | Mtg2       | -0.065 |
| E4f1       | 5.24191E-05 | 1.169973956 | 0.083 | 0.185 | 1 | WT | E4f1       | -0.102 |
| Parpbp     | 5.29969E-05 | 0.695988624 | 0.029 | 0.088 | 1 | WT | Parpbp     | -0.059 |
| Lcor       | 5.38438E-05 | 1.110004469 | 0.047 | 0.122 | 1 | WT | Lcor       | -0.075 |
| Tfdp2      | 5.55781E-05 | 0.699771032 | 0.088 | 0.193 | 1 | WT | Tfdp2      | -0.105 |
| Ccdc32     | 5.58008E-05 | 0.8830173   | 0.057 | 0.139 | 1 | WT | Ccdc32     | -0.082 |
| Aven       | 5.69968E-05 | 0.75815333  | 0.027 | 0.084 | 1 | WT | Aven       | -0.057 |
| Pnpla7     | 5.97624E-05 | 1.010452343 | 0.04  | 0.109 | 1 | WT | Pnpla7     | -0.069 |
| Jun        | 6.23176E-05 | 0.741176652 | 0.183 | 0.349 | 1 | WT | Jun        | -0.166 |
| Creb3      | 6.36874E-05 | 0.935153264 | 0.05  | 0.126 | 1 | WT | Creb3      | -0.076 |
| Samd8      | 6.37929E-05 | 0.6993189   | 0.025 | 0.08  | 1 | WT | Samd8      | -0.055 |
| Gm32051    | 6.68866E-05 | 4.841638969 | 0.063 | 0     | 1 | WT | Gm32051    | 0.063  |
| Asah1      | 7.07197E-05 | 0.699519804 | 0.053 | 0.13  | 1 | WT | Asah1      | -0.077 |
| Clcn7      | 7.0792E-05  | 1.086916574 | 0.038 | 0.105 | 1 | WT | Clcn7      | -0.067 |
| Ccdc84     | 7.19187E-05 | 0.897110787 | 0.023 | 0.076 | 1 | WT | Ccdc84     | -0.053 |
| Spindoc    | 7.66187E-05 | 0.704342909 | 0.021 | 0.071 | 1 | WT | Spindoc    | -0.05  |
| Smpd2      | 8.32893E-05 | 0.884247743 | 0.019 | 0.067 | 1 | WT | Smpd2      | -0.048 |
| Nr2f6      | 8.32893E-05 | 0.787870674 | 0.019 | 0.067 | 1 | WT | Nr2f6      | -0.048 |
| Rufy3      | 8.49537E-05 | 0.715628998 | 0.019 | 0.067 | 1 | WT | Rufy3      | -0.048 |
| Gm5617     | 8.63732E-05 | 0.906458573 | 0.041 | 0.109 | 1 | WT | Gm5617     | -0.068 |
| Col4a2     | 8.742E-05   | 5.053223747 | 0.062 | 0     | 1 | WT | Col4a2     | 0.062  |
| Rps6kb2    | 8.78904E-05 | 1.123819627 | 0.046 | 0.118 | 1 | WT | Rps6kb2    | -0.072 |
| Hist1h1b   | 8.90045E-05 | 0.719536946 | 0.159 | 0.298 | 1 | WT | Hist1h1b   | -0.139 |
| Sec22a     | 9.26446E-05 | 1.172816874 | 0.041 | 0.109 | 1 | WT | Sec22a     | -0.068 |
| Camta1     | 9.58634E-05 | 0.893403022 | 0.103 | 0.214 | 1 | WT | Camta1     | -0.111 |
| Poc1a      | 9.68125E-05 | 0.8076184   | 0.056 | 0.134 | 1 | WT | Poc1a      | -0.078 |
| Cyp4f13    | 0.000101444 | 0.790074465 | 0.026 | 0.08  | 1 | WT | Cyp4f13    | -0.054 |
| Lrrc45     | 0.000104064 | 0.845818289 | 0.033 | 0.092 | 1 | WT | Lrrc45     | -0.059 |
| Fam49a     | 0.000108469 | 0.953523072 | 0.026 | 0.08  | 1 | WT | Fam49a     | -0.054 |
| Spata6     | 0.00010904  | 1.008587935 | 0.059 | 0.139 | 1 | WT | Spata6     | -0.08  |
| Gm20186    | 0.000110596 | 0.783571877 | 0.044 | 0.113 | 1 | WT | Gm20186    | -0.069 |
| Gadd45gip1 | 0.000113859 | 1.001269852 | 0.178 | 0.345 | 1 | WT | Gadd45gip1 | -0.167 |
| Gypa       | 0.000114212 | 5.461984605 | 0.06  | 0     | 1 | WT | Gypa       | 0.06   |
| Wdfy2      | 0.000116837 | 0.904856611 | 0.024 | 0.076 | 1 | WT | Wdfy2      | -0.052 |
| Gne        | 0.000118033 | 0.805100673 | 0.024 | 0.076 | 1 | WT | Gne        | -0.052 |
| Piga       | 0.000124629 | 0.977310139 | 0.045 | 0.113 | 1 | WT | Piga       | -0.068 |
| Nr1d2      | 0.00013221  | 0.964487316 | 0.022 | 0.071 | 1 | WT | Nr1d2      | -0.049 |
| Borcs6     | 0.000133502 | 0.960089599 | 0.042 | 0.109 | 1 | WT | Borcs6     | -0.067 |
| Tmem191c   | 0.0001366   | 1.022539971 | 0.047 | 0.118 | 1 | WT | Tmem191c   | -0.071 |
| Epb41l4aos | 0.000137565 | 1.070842199 | 0.085 | 0.181 | 1 | WT | Epb41l4aos | -0.096 |
| Adck5      | 0.000139767 | 1.207387147 | 0.047 | 0.118 | 1 | WT | Adck5      | -0.071 |
| Manbal     | 0.000146072 | 0.793812985 | 0.09  | 0.189 | 1 | WT | Manbal     | -0.099 |
| Mrpl50     | 0.000150233 | 1.015182382 | 0.085 | 0.181 | 1 | WT | Mrpl50     | -0.096 |
| Tspan3     | 0.000150333 | 0.861309682 | 0.062 | 0.143 | 1 | WT | Tspan3     | -0.081 |
| Gm10138    | 0.000160925 | 0.858804328 | 0.018 | 0.063 | 1 | WT | Gm10138    | -0.045 |

|             |             |             |       |       |   |    |             |        |
|-------------|-------------|-------------|-------|-------|---|----|-------------|--------|
| Slc4a8      | 0.000167774 | 0.960420909 | 0.027 | 0.08  | 1 | WT | Slc4a8      | -0.053 |
| Tsr3        | 0.00017792  | 0.833062531 | 0.101 | 0.206 | 1 | WT | Tsr3        | -0.105 |
| Rcan3       | 0.000187775 | 1.185175241 | 0.048 | 0.118 | 1 | WT | Rcan3       | -0.07  |
| Rab37       | 0.000189559 | 0.869101711 | 0.032 | 0.088 | 1 | WT | Rab37       | -0.056 |
| Tm4sf1      | 0.000202301 | 4.145139276 | 0.071 | 0.008 | 1 | WT | Tm4sf1      | 0.063  |
| Rtl8a       | 0.000206005 | 1.01360438  | 0.051 | 0.122 | 1 | WT | Rtl8a       | -0.071 |
| Tfpi        | 0.000216648 | 0.787618526 | 0.023 | 0.071 | 1 | WT | Tfpi        | -0.048 |
| Champ1      | 0.000223179 | 0.862177195 | 0.03  | 0.084 | 1 | WT | Champ1      | -0.054 |
| Ptdss2      | 0.000223273 | 1.013368372 | 0.023 | 0.071 | 1 | WT | Ptdss2      | -0.048 |
| Gm43848     | 0.000226089 | 0.944030991 | 0.023 | 0.071 | 1 | WT | Gm43848     | -0.048 |
| Tagln       | 0.000234912 | 4.744432196 | 0.062 | 0.004 | 1 | WT | Tagln       | 0.058  |
| Cry1        | 0.000235037 | 0.923667299 | 0.039 | 0.101 | 1 | WT | Cry1        | -0.062 |
| Ift80       | 0.000237404 | 0.965476391 | 0.039 | 0.101 | 1 | WT | Ift80       | -0.062 |
| Wfdc17      | 0.000240497 | 3.810549293 | 0.118 | 0.042 | 1 | WT | Wfdc17      | 0.076  |
| Zfp120      | 0.000244989 | 0.762338698 | 0.049 | 0.118 | 1 | WT | Zfp120      | -0.069 |
| Tmem203     | 0.000248886 | 0.840345984 | 0.085 | 0.176 | 1 | WT | Tmem203     | -0.091 |
| Klhdc2      | 0.00025728  | 1.267723936 | 0.136 | 0.261 | 1 | WT | Klhdc2      | -0.125 |
| Nt5dc2      | 0.000312099 | 0.805931751 | 0.026 | 0.076 | 1 | WT | Nt5dc2      | -0.05  |
| 8430408G22R | 0.000331619 | 4.802365514 | 0.052 | 0     | 1 | WT | 8430408G22R | 0.052  |
| Ikbip       | 0.000331689 | 1.055248726 | 0.015 | 0.055 | 1 | WT | Ikbip       | -0.04  |
| Tex9        | 0.00033299  | 0.81643166  | 0.031 | 0.084 | 1 | WT | Tex9        | -0.053 |
| Eef2kmt     | 0.000361095 | 0.781472617 | 0.036 | 0.092 | 1 | WT | Eef2kmt     | -0.056 |
| Msrb1       | 0.000396753 | 1.376112228 | 0.16  | 0.303 | 1 | WT | Msrb1       | -0.143 |
| Gda         | 0.000402099 | 3.700744636 | 0.073 | 0.013 | 1 | WT | Gda         | 0.06   |
| Cd320       | 0.000417922 | 0.83909452  | 0.038 | 0.097 | 1 | WT | Cd320       | -0.059 |
| Lym7        | 0.000418837 | 0.736731159 | 0.005 | 0.029 | 1 | WT | Lym7        | -0.024 |
| Cep97       | 0.000422962 | 1.148849544 | 0.048 | 0.113 | 1 | WT | Cep97       | -0.065 |
| Gzme        | 0.000446956 | 0.705203917 | 0.042 | 0.101 | 1 | WT | Gzme        | -0.059 |
| Serpinh1    | 0.000451779 | 3.844953538 | 0.079 | 0.017 | 1 | WT | Serpinh1    | 0.062  |
| Rap2b       | 0.000459139 | 1.09019607  | 0.051 | 0.118 | 1 | WT | Rap2b       | -0.067 |
| Cenpu       | 0.000459963 | 0.712728376 | 0.02  | 0.063 | 1 | WT | Cenpu       | -0.043 |
| Cd24a       | 0.00048126  | 3.00505632  | 0.086 | 0.021 | 1 | WT | Cd24a       | 0.065  |
| Tbcc        | 0.000484598 | 0.962643602 | 0.054 | 0.122 | 1 | WT | Tbcc        | -0.068 |
| Ctsh        | 0.000498153 | 0.739505979 | 0.032 | 0.084 | 1 | WT | Ctsh        | -0.052 |
| Tma16       | 0.000506815 | 0.911719671 | 0.074 | 0.155 | 1 | WT | Tma16       | -0.081 |
| Tmem87b     | 0.000521304 | 0.74670964  | 0.049 | 0.113 | 1 | WT | Tmem87b     | -0.064 |
| Tmem97      | 0.000531768 | 0.749320635 | 0.093 | 0.185 | 1 | WT | Tmem97      | -0.092 |
| Ftl1-ps1    | 0.000538893 | 0.837117634 | 0.025 | 0.071 | 1 | WT | Ftl1-ps1    | -0.046 |
| Ddit4       | 0.000555943 | 0.957708266 | 0.207 | 0.374 | 1 | WT | Ddit4       | -0.167 |
| Man2a2      | 0.000558728 | 1.30106459  | 0.064 | 0.139 | 1 | WT | Man2a2      | -0.075 |
| Tpcn1       | 0.000578376 | 0.727110805 | 0.016 | 0.055 | 1 | WT | Tpcn1       | -0.039 |
| Akap12      | 0.000584757 | 0.733604597 | 0.016 | 0.055 | 1 | WT | Akap12      | -0.039 |
| Dync2h1     | 0.000591663 | 1.067799826 | 0.044 | 0.105 | 1 | WT | Dync2h1     | -0.061 |
| Fam210b     | 0.000592356 | 0.800004519 | 0.035 | 0.088 | 1 | WT | Fam210b     | -0.053 |
| Ctsz        | 0.00059397  | 0.823853302 | 0.175 | 0.319 | 1 | WT | Ctsz        | -0.144 |
| Armc5       | 0.000623541 | 0.93416858  | 0.023 | 0.067 | 1 | WT | Armc5       | -0.044 |
| Blvrb       | 0.000634569 | 3.328941549 | 0.132 | 0.059 | 1 | WT | Blvrb       | 0.073  |
| Sapcd2      | 0.000642756 | 1.009896791 | 0.052 | 0.118 | 1 | WT | Sapcd2      | -0.066 |
| Ss18l2      | 0.000704628 | 1.143406234 | 0.102 | 0.197 | 1 | WT | Ss18l2      | -0.095 |
| Abhd18      | 0.000724567 | 0.773334921 | 0.05  | 0.113 | 1 | WT | Abhd18      | -0.063 |
| Rmnd1       | 0.0007269   | 0.949153959 | 0.033 | 0.084 | 1 | WT | Rmnd1       | -0.051 |

|             |             |             |       |       |   |    |             |        |
|-------------|-------------|-------------|-------|-------|---|----|-------------|--------|
| 9430015G10R | 0.000739123 | 0.816826873 | 0.021 | 0.063 | 1 | WT | 9430015G10R | -0.042 |
| Zswim7      | 0.000816046 | 1.104143827 | 0.045 | 0.105 | 1 | WT | Zswim7      | -0.06  |
| Nkiras2     | 0.000830787 | 1.397873251 | 0.05  | 0.113 | 1 | WT | Nkiras2     | -0.063 |
| Myl9        | 0.000840099 | 4.75778815  | 0.045 | 0     | 1 | WT | Myl9        | 0.045  |
| Lcn2        | 0.0008401   | 5.459321882 | 0.045 | 0     | 1 | WT | Lcn2        | 0.045  |
| Emcn        | 0.0008401   | 4.638177148 | 0.045 | 0     | 1 | WT | Emcn        | 0.045  |
| Rasgrp2     | 0.000863479 | 1.315996995 | 0.056 | 0.122 | 1 | WT | Rasgrp2     | -0.066 |
| Hist1h2bg   | 0.000894786 | 1.16119856  | 0.036 | 0.088 | 1 | WT | Hist1h2bg   | -0.052 |
| Ppox        | 0.00097878  | 1.113707224 | 0.038 | 0.092 | 1 | WT | Ppox        | -0.054 |
| Hist2h2ac   | 0.000981958 | 1.043112204 | 0.043 | 0.101 | 1 | WT | Hist2h2ac   | -0.058 |
| Dhrs3       | 0.001002032 | 0.980552568 | 0.024 | 0.067 | 1 | WT | Dhrs3       | -0.043 |
| C1qc        | 0.001008968 | 3.193493937 | 0.113 | 0.046 | 1 | WT | C1qc        | 0.067  |
| Cerk        | 0.001054412 | 1.01958941  | 0.049 | 0.109 | 1 | WT | Cerk        | -0.06  |
| Tyrp1       | 0.00105864  | 3.145274963 | 0.18  | 0.109 | 1 | WT | Tyrp1       | 0.071  |
| Hist1h4h    | 0.001064053 | 1.085755777 | 0.112 | 0.21  | 1 | WT | Hist1h4h    | -0.098 |
| Tspyl2      | 0.001077301 | 1.241342351 | 0.029 | 0.076 | 1 | WT | Tspyl2      | -0.047 |
| Znhit2      | 0.001094905 | 1.07081672  | 0.057 | 0.122 | 1 | WT | Znhit2      | -0.065 |
| Mpp1        | 0.001099038 | 1.112447669 | 0.066 | 0.139 | 1 | WT | Mpp1        | -0.073 |
| Cpeb2       | 0.001107643 | 1.157880446 | 0.034 | 0.084 | 1 | WT | Cpeb2       | -0.05  |
| Eya2        | 0.001139434 | 0.818056902 | 0.006 | 0.029 | 1 | WT | Eya2        | -0.023 |
| Sirt3       | 0.001214107 | 1.106217454 | 0.037 | 0.088 | 1 | WT | Sirt3       | -0.051 |
| Spns1       | 0.001218748 | 1.449407973 | 0.041 | 0.097 | 1 | WT | Spns1       | -0.056 |
| Lst1        | 0.001238448 | 0.821091582 | 0.044 | 0.101 | 1 | WT | Lst1        | -0.057 |
| Bivm        | 0.001249377 | 0.720653244 | 0.013 | 0.046 | 1 | WT | Bivm        | -0.033 |
| Trmt11      | 0.001277296 | 0.856294945 | 0.032 | 0.08  | 1 | WT | Trmt11      | -0.048 |
| Fam213a     | 0.001312721 | 0.919044646 | 0.122 | 0.223 | 1 | WT | Fam213a     | -0.101 |
| Ciart       | 0.001369269 | 0.703216643 | 0.01  | 0.038 | 1 | WT | Ciart       | -0.028 |
| Zfp668      | 0.001372016 | 0.74883515  | 0.02  | 0.059 | 1 | WT | Zfp668      | -0.039 |
| Lef1        | 0.001414828 | 1.183271002 | 0.074 | 0.147 | 1 | WT | Lef1        | -0.073 |
| Il1b        | 0.001421174 | 1.305953402 | 0.035 | 0.084 | 1 | WT | Il1b        | -0.049 |
| Bola1       | 0.001428244 | 0.911791321 | 0.111 | 0.206 | 1 | WT | Bola1       | -0.095 |
| Ptges2      | 0.00146648  | 0.916779724 | 0.025 | 0.067 | 1 | WT | Ptges2      | -0.042 |
| Scpep1      | 0.001501973 | 0.841982718 | 0.025 | 0.067 | 1 | WT | Scpep1      | -0.042 |
| Qtrt2       | 0.001632535 | 1.320380583 | 0.018 | 0.055 | 1 | WT | Qtrt2       | -0.037 |
| Rabl3       | 0.001635762 | 0.840261726 | 0.038 | 0.088 | 1 | WT | Rabl3       | -0.05  |
| Trf         | 0.00172022  | 0.797972215 | 0.023 | 0.063 | 1 | WT | Trf         | -0.04  |
| Usp33       | 0.001786498 | 0.958053234 | 0.023 | 0.063 | 1 | WT | Usp33       | -0.04  |
| Def8        | 0.00180243  | 0.824710046 | 0.023 | 0.063 | 1 | WT | Def8        | -0.04  |
| Dtd2        | 0.00186966  | 0.92412442  | 0.04  | 0.092 | 1 | WT | Dtd2        | -0.052 |
| Arfip2      | 0.001893125 | 1.116404505 | 0.048 | 0.105 | 1 | WT | Arfip2      | -0.057 |
| Ext1        | 0.001900149 | 0.983718022 | 0.016 | 0.05  | 1 | WT | Ext1        | -0.034 |
| Ccl2        | 0.001939428 | 1.074797315 | 0.059 | 0.122 | 1 | WT | Ccl2        | -0.063 |
| Slc24a5     | 0.002077183 | 1.510361709 | 0.085 | 0.164 | 1 | WT | Slc24a5     | -0.079 |
| Zcchc4      | 0.002114131 | 0.846779701 | 0.046 | 0.101 | 1 | WT | Zcchc4      | -0.055 |
| Dennd3      | 0.00213491  | 1.26314376  | 0.014 | 0.046 | 1 | WT | Dennd3      | -0.032 |
| Adrb2       | 0.00213491  | 0.795141438 | 0.014 | 0.046 | 1 | WT | Adrb2       | -0.032 |
| Ick         | 0.002159556 | 0.842202818 | 0.026 | 0.067 | 1 | WT | Ick         | -0.041 |
| Cnpy3       | 0.002187028 | 1.144441321 | 0.062 | 0.126 | 1 | WT | Cnpy3       | -0.064 |
| Gm11131     | 0.002189721 | 1.138649864 | 0.021 | 0.059 | 1 | WT | Gm11131     | -0.038 |
| Rpap2       | 0.002196287 | 0.776458149 | 0.038 | 0.088 | 1 | WT | Rpap2       | -0.05  |
| Ino80b      | 0.002234849 | 1.003880259 | 0.113 | 0.206 | 1 | WT | Ino80b      | -0.093 |

|              |             |             |       |       |   |    |              |        |
|--------------|-------------|-------------|-------|-------|---|----|--------------|--------|
| Mfsd3        | 0.002260851 | 0.709300308 | 0.005 | 0.025 | 1 | WT | Mfsd3        | -0.02  |
| Tpm2         | 0.002270712 | 4.592342019 | 0.046 | 0.004 | 1 | WT | Tpm2         | 0.042  |
| Sgcb         | 0.002280413 | 0.85315115  | 0.034 | 0.08  | 1 | WT | Sgcb         | -0.046 |
| Stoml1       | 0.002307052 | 0.998094571 | 0.038 | 0.088 | 1 | WT | Stoml1       | -0.05  |
| Adgrg3       | 0.002412894 | 0.835792246 | 0.013 | 0.042 | 1 | WT | Adgrg3       | -0.029 |
| Zfp113       | 0.002600547 | 1.005025368 | 0.019 | 0.055 | 1 | WT | Zfp113       | -0.036 |
| Tns1         | 0.00260532  | 0.965919282 | 0.029 | 0.071 | 1 | WT | Tns1         | -0.042 |
| Miga1        | 0.002637429 | 0.769891615 | 0.024 | 0.063 | 1 | WT | Miga1        | -0.039 |
| Zfp316       | 0.002662664 | 1.015065555 | 0.007 | 0.029 | 1 | WT | Zfp316       | -0.022 |
| Hist1h2be    | 0.002683455 | 0.798814257 | 0.044 | 0.097 | 1 | WT | Hist1h2be    | -0.053 |
| Rnf25        | 0.002705418 | 0.973367344 | 0.024 | 0.063 | 1 | WT | Rnf25        | -0.039 |
| Usp49        | 0.002719053 | 0.758515933 | 0.009 | 0.034 | 1 | WT | Usp49        | -0.025 |
| Gm16740      | 0.002736611 | 0.754803351 | 0.009 | 0.034 | 1 | WT | Gm16740      | -0.025 |
| Fdps         | 0.002760899 | 0.735068894 | 0.127 | 0.223 | 1 | WT | Fdps         | -0.096 |
| Zfp637       | 0.002775564 | 1.100727332 | 0.037 | 0.084 | 1 | WT | Zfp637       | -0.047 |
| Tom1         | 0.002930007 | 0.805440603 | 0.017 | 0.05  | 1 | WT | Tom1         | -0.033 |
| Alg3         | 0.003124386 | 0.766343356 | 0.027 | 0.067 | 1 | WT | Alg3         | -0.04  |
| Hist3h2ba    | 0.003195525 | 1.42096709  | 0.047 | 0.101 | 1 | WT | Hist3h2ba    | -0.054 |
| Vat1         | 0.003211983 | 0.901991912 | 0.072 | 0.139 | 1 | WT | Vat1         | -0.067 |
| Rabac1       | 0.003212514 | 0.867275335 | 0.367 | 0.655 | 1 | WT | Rabac1       | -0.288 |
| Rnf185       | 0.003215831 | 0.975013367 | 0.022 | 0.059 | 1 | WT | Rnf185       | -0.037 |
| Trmu         | 0.003229798 | 1.365882344 | 0.022 | 0.059 | 1 | WT | Trmu         | -0.037 |
| 2700062C07R  | 0.003241587 | 0.825878539 | 0.053 | 0.109 | 1 | WT | 2700062C07R  | -0.056 |
| 4930522L14Ri | 0.003309831 | 0.927503383 | 0.053 | 0.109 | 1 | WT | 4930522L14Ri | -0.056 |
| Ecschr       | 0.003386729 | 4.469605077 | 0.043 | 0.004 | 1 | WT | Ecschr       | 0.039  |
| Gm10073      | 0.003620143 | 1.335044814 | 0.199 | 0.345 | 1 | WT | Gm10073      | -0.146 |
| 1600020E01Ri | 0.00366421  | 1.333044412 | 0.066 | 0.13  | 1 | WT | 1600020E01Ri | -0.064 |
| Ier3         | 0.003879242 | 0.752214085 | 0.147 | 0.252 | 1 | WT | Ier3         | -0.105 |
| Phf13        | 0.003946726 | 1.499968215 | 0.02  | 0.055 | 1 | WT | Phf13        | -0.035 |
| Cdk16        | 0.00396244  | 1.134135692 | 0.051 | 0.105 | 1 | WT | Cdk16        | -0.054 |
| Selenon      | 0.003983355 | 0.805039105 | 0.033 | 0.076 | 1 | WT | Selenon      | -0.043 |
| Rab33b       | 0.003986482 | 0.869876707 | 0.025 | 0.063 | 1 | WT | Rab33b       | -0.038 |
| Zfp787       | 0.004033254 | 1.173066436 | 0.116 | 0.206 | 1 | WT | Zfp787       | -0.09  |
| Ica1         | 0.004068393 | 0.82081535  | 0.013 | 0.042 | 1 | WT | Ica1         | -0.029 |
| Klc4         | 0.004111246 | 0.970464042 | 0.013 | 0.042 | 1 | WT | Klc4         | -0.029 |
| Syt4         | 0.004237219 | 3.903450013 | 0.056 | 0.013 | 1 | WT | Syt4         | 0.043  |
| Pias3        | 0.004272696 | 1.274504178 | 0.033 | 0.076 | 1 | WT | Pias3        | -0.043 |
| Lncpint      | 0.004448218 | 0.961504748 | 0.073 | 0.139 | 1 | WT | Lncpint      | -0.066 |
| Gzmc         | 0.004448627 | 1.156354337 | 0.114 | 0.189 | 1 | WT | Gzmc         | -0.075 |
| Pdlim1       | 0.00445363  | 0.832995576 | 0.049 | 0.101 | 1 | WT | Pdlim1       | -0.052 |
| Samd3        | 0.004678488 | 0.961710847 | 0.023 | 0.059 | 1 | WT | Samd3        | -0.036 |
| Glce         | 0.004697875 | 0.797834106 | 0.012 | 0.038 | 1 | WT | Glce         | -0.026 |
| Ipo13        | 0.004736842 | 1.175152093 | 0.023 | 0.059 | 1 | WT | Ipo13        | -0.036 |
| Hist1h3g     | 0.00477611  | 1.061386632 | 0.023 | 0.059 | 1 | WT | Hist1h3g     | -0.036 |
| Cald1        | 0.004789032 | 4.62769905  | 0.048 | 0.008 | 1 | WT | Cald1        | 0.04   |
| Nudt13       | 0.004944517 | 0.985483791 | 0.031 | 0.071 | 1 | WT | Nudt13       | -0.04  |
| Pinx1        | 0.004952428 | 0.70573771  | 0.052 | 0.105 | 1 | WT | Pinx1        | -0.053 |
| Tef          | 0.00504868  | 1.239219689 | 0.038 | 0.084 | 1 | WT | Tef          | -0.046 |
| Plvap        | 0.00505158  | 3.863270825 | 0.04  | 0.004 | 1 | WT | Plvap        | 0.036  |
| Angptl6      | 0.005154889 | 0.696653936 | 0.01  | 0.034 | 1 | WT | Angptl6      | -0.024 |
| Ndrp2        | 0.005170129 | 0.79066043  | 0.01  | 0.034 | 1 | WT | Ndrp2        | -0.024 |

|             |             |             |       |       |   |    |             |        |
|-------------|-------------|-------------|-------|-------|---|----|-------------|--------|
| Hrh2        | 0.00518541  | 0.725445313 | 0.01  | 0.034 | 1 | WT | Hrh2        | -0.024 |
| Lysmd1      | 0.005200731 | 0.883639278 | 0.01  | 0.034 | 1 | WT | Lysmd1      | -0.024 |
| Hist1h3e    | 0.005213793 | 1.33544246  | 0.122 | 0.214 | 1 | WT | Hist1h3e    | -0.092 |
| Cd63        | 0.005388808 | 2.454362409 | 0.194 | 0.139 | 1 | WT | Cd63        | 0.055  |
| Ctgf        | 0.00539423  | 4.008396657 | 0.032 | 0     | 1 | WT | Ctgf        | 0.032  |
| Kif24       | 0.005456519 | 0.709528526 | 0.008 | 0.029 | 1 | WT | Kif24       | -0.021 |
| Cela1       | 0.005601508 | 0.758673251 | 0.016 | 0.046 | 1 | WT | Cela1       | -0.03  |
| Gab3        | 0.005627975 | 0.814988208 | 0.016 | 0.046 | 1 | WT | Gab3        | -0.03  |
| Mlana       | 0.005664864 | 2.498709554 | 0.114 | 0.059 | 1 | WT | Mlana       | 0.055  |
| Mpp5        | 0.005736117 | 1.056831712 | 0.021 | 0.055 | 1 | WT | Mpp5        | -0.034 |
| Mgp         | 0.0057721   | 4.168511615 | 0.039 | 0.004 | 1 | WT | Mgp         | 0.035  |
| Pyroxd1     | 0.005824539 | 1.163611131 | 0.034 | 0.076 | 1 | WT | Pyroxd1     | -0.042 |
| Hist1h4i    | 0.005978585 | 1.125218954 | 0.202 | 0.34  | 1 | WT | Hist1h4i    | -0.138 |
| Dnajc17     | 0.006073768 | 0.795033169 | 0.037 | 0.08  | 1 | WT | Dnajc17     | -0.043 |
| Thbs1       | 0.006094307 | 3.556861323 | 0.083 | 0.034 | 1 | WT | Thbs1       | 0.049  |
| Irak1bp1    | 0.00612286  | 0.974572787 | 0.029 | 0.067 | 1 | WT | Irak1bp1    | -0.038 |
| Zfp397      | 0.006452373 | 1.273168502 | 0.05  | 0.101 | 1 | WT | Zfp397      | -0.051 |
| Mfge8       | 0.006573935 | 1.400602288 | 0.083 | 0.151 | 1 | WT | Mfge8       | -0.068 |
| Poli        | 0.00657432  | 0.94603674  | 0.014 | 0.042 | 1 | WT | Poli        | -0.028 |
| Dhcr24      | 0.006590255 | 1.028374167 | 0.063 | 0.122 | 1 | WT | Dhcr24      | -0.059 |
| Slpi        | 0.006595684 | 4.367002919 | 0.038 | 0.004 | 1 | WT | Slpi        | 0.034  |
| Rgs5        | 0.006608404 | 3.992480808 | 0.038 | 0.004 | 1 | WT | Rgs5        | 0.034  |
| Cdk14       | 0.006639105 | 0.746259569 | 0.014 | 0.042 | 1 | WT | Cdk14       | -0.028 |
| Tbc1d17     | 0.006664583 | 1.300363487 | 0.053 | 0.105 | 1 | WT | Tbc1d17     | -0.052 |
| Abcc5       | 0.006715081 | 1.005250711 | 0.024 | 0.059 | 1 | WT | Abcc5       | -0.035 |
| Mcrip2      | 0.006741591 | 1.375781385 | 0.024 | 0.059 | 1 | WT | Mcrip2      | -0.035 |
| Gtpbp3      | 0.006754881 | 1.099954856 | 0.024 | 0.059 | 1 | WT | Gtpbp3      | -0.035 |
| Mtmr4       | 0.006932335 | 0.931025654 | 0.019 | 0.05  | 1 | WT | Mtmr4       | -0.031 |
| Timp1       | 0.007044942 | 4.340239281 | 0.03  | 0     | 1 | WT | Timp1       | 0.03   |
| Ctsl        | 0.007054333 | 1.074705715 | 0.075 | 0.139 | 1 | WT | Ctsl        | -0.064 |
| 1110065P20R | 0.007209724 | 1.257963269 | 0.081 | 0.147 | 1 | WT | 1110065P20R | -0.066 |
| Ccl7        | 0.007238206 | 1.175444395 | 0.045 | 0.092 | 1 | WT | Ccl7        | -0.047 |
| Gatsl3      | 0.007465463 | 0.911049342 | 0.027 | 0.063 | 1 | WT | Gatsl3      | -0.036 |
| Hp          | 0.007537199 | 4.2454691   | 0.038 | 0.004 | 1 | WT | Hp          | 0.034  |
| Fbxw9       | 0.007704797 | 0.920416422 | 0.027 | 0.063 | 1 | WT | Fbxw9       | -0.036 |
| Tnfaip2     | 0.007737148 | 0.703322404 | 0.013 | 0.038 | 1 | WT | Tnfaip2     | -0.025 |
| Sertad3     | 0.008541279 | 0.896622197 | 0.03  | 0.067 | 1 | WT | Sertad3     | -0.037 |
| Tm9sf1      | 0.008559486 | 0.788668972 | 0.017 | 0.046 | 1 | WT | Tm9sf1      | -0.029 |
| Amigo3      | 0.008943452 | 0.800341087 | 0.003 | 0.017 | 1 | WT | Amigo3      | -0.014 |
| Sesn2       | 0.008996075 | 0.699406245 | 0.011 | 0.034 | 1 | WT | Sesn2       | -0.023 |
| Zfp90       | 0.009069667 | 0.913975735 | 0.011 | 0.034 | 1 | WT | Zfp90       | -0.023 |
| Mccc1       | 0.009094317 | 1.001525379 | 0.011 | 0.034 | 1 | WT | Mccc1       | -0.023 |
| Pkig        | 0.009096785 | 0.926606774 | 0.049 | 0.097 | 1 | WT | Pkig        | -0.048 |
| Txnip       | 0.009097012 | 2.21866781  | 0.326 | 0.319 | 1 | WT | Txnip       | 0.007  |
| Haspin      | 0.009161455 | 0.762250869 | 0.025 | 0.059 | 1 | WT | Haspin      | -0.034 |
| Tspo2       | 0.009207339 | 3.363574432 | 0.028 | 0     | 1 | WT | Tspo2       | 0.028  |
| Zfp52       | 0.009283014 | 0.899128125 | 0.025 | 0.059 | 1 | WT | Zfp52       | -0.034 |
| Amdhd2      | 0.009702095 | 1.130377098 | 0.049 | 0.097 | 1 | WT | Amdhd2      | -0.048 |
| Tmem154     | 0.009737472 | 1.104774776 | 0.036 | 0.076 | 1 | WT | Tmem154     | -0.04  |
| Cirbp       | 0.009784844 | 0.948311675 | 0.347 | 0.609 | 1 | WT | Cirbp       | -0.262 |
| Nudt14      | 0.009796402 | 1.307360752 | 0.052 | 0.101 | 1 | WT | Nudt14      | -0.049 |



|             |             |             |       |       |             |      |             |        |
|-------------|-------------|-------------|-------|-------|-------------|------|-------------|--------|
| Ass1        | 0.00980949  | 1.08428269  | 0.157 | 0.256 |             | 1 WT | Ass1        | -0.099 |
| Hist1h2bb   | 0.009816227 | 1.598575323 | 0.085 | 0.151 |             | 1 WT | Hist1h2bb   | -0.066 |
| S100b       | 0.009863614 | 3.693704491 | 0.036 | 0.004 |             | 1 WT | S100b       | 0.032  |
| Rbp7        | 0.009882533 | 3.656805001 | 0.036 | 0.004 |             | 1 WT | Rbp7        | 0.032  |
| Il21r       | 1.2173E-118 | 3.118049979 | 0.782 | 0.088 | 3.7802E-114 | KO   | Il21r       | 0.694  |
| Rgs2        | 3.3109E-111 | 2.721919022 | 0.878 | 0.145 | 1.0281E-106 | KO   | Rgs2        | 0.733  |
| Klre1       | 5.2272E-105 | 3.028314916 | 0.622 | 0.046 | 1.6232E-100 | KO   | Klre1       | 0.576  |
| Nr4a2       | 7.4707E-103 | 3.164217513 | 0.765 | 0.117 | 2.31987E-98 | KO   | Nr4a2       | 0.648  |
| Kdm6b       | 7.1289E-101 | 2.664071277 | 0.639 | 0.054 | 2.21374E-96 | KO   | Kdm6b       | 0.585  |
| Nr4a3       | 4.399E-100  | 3.015771206 | 0.622 | 0.051 | 1.36603E-95 | KO   | Nr4a3       | 0.571  |
| Crem        | 1.4853E-99  | 2.465115639 | 0.756 | 0.1   | 4.61233E-95 | KO   | Crem        | 0.656  |
| Tnfrsf1b    | 6.74582E-98 | 2.206193382 | 0.786 | 0.109 | 2.09478E-93 | KO   | Tnfrsf1b    | 0.677  |
| Rgs16       | 3.6372E-93  | 3.272299924 | 0.718 | 0.11  | 1.12946E-88 | KO   | Rgs16       | 0.608  |
| Nr4a1       | 1.42007E-89 | 2.702101662 | 0.563 | 0.045 | 4.40976E-85 | KO   | Nr4a1       | 0.518  |
| H2-T23      | 3.24125E-88 | 2.300800976 | 0.878 | 0.216 | 1.00651E-83 | KO   | H2-T23      | 0.662  |
| Pim1        | 3.87025E-87 | 2.745705704 | 0.765 | 0.138 | 1.20183E-82 | KO   | Pim1        | 0.627  |
| Gpr132      | 1.5837E-86  | 2.259319624 | 0.723 | 0.101 | 4.91787E-82 | KO   | Gpr132      | 0.622  |
| Gem         | 1.99715E-84 | 2.359135338 | 0.639 | 0.079 | 6.20176E-80 | KO   | Gem         | 0.56   |
| Vps37b      | 3.22844E-82 | 2.056462296 | 0.908 | 0.228 | 1.00253E-77 | KO   | Vps37b      | 0.68   |
| Neurl3      | 1.47423E-80 | 1.854401925 | 0.613 | 0.069 | 4.57793E-76 | KO   | Neurl3      | 0.544  |
| Dock8       | 5.89206E-80 | 1.746405672 | 0.706 | 0.103 | 1.82966E-75 | KO   | Dock8       | 0.603  |
| Cap1        | 2.06789E-79 | 1.963366528 | 0.731 | 0.121 | 6.42141E-75 | KO   | Cap1        | 0.61   |
| H2-T22      | 4.87899E-79 | 1.651435518 | 0.849 | 0.176 | 1.51507E-74 | KO   | H2-T22      | 0.673  |
| Gtf2i       | 7.10042E-79 | 1.805885432 | 0.647 | 0.085 | 2.20489E-74 | KO   | Gtf2i       | 0.562  |
| Fosl2       | 9.22466E-79 | 1.746547092 | 0.853 | 0.173 | 2.86453E-74 | KO   | Fosl2       | 0.68   |
| F2r         | 9.48438E-79 | 2.276569556 | 0.517 | 0.044 | 2.94518E-74 | KO   | F2r         | 0.473  |
| Ppp1r16b    | 4.32107E-78 | 1.554970117 | 0.718 | 0.111 | 1.34182E-73 | KO   | Ppp1r16b    | 0.607  |
| Atxn1       | 6.84869E-77 | 1.753401354 | 0.777 | 0.14  | 2.12672E-72 | KO   | Atxn1       | 0.637  |
| Ndfip2      | 1.50814E-76 | 1.697056236 | 0.685 | 0.104 | 4.68324E-72 | KO   | Ndfip2      | 0.581  |
| Mid1        | 1.90529E-76 | 3.065628762 | 0.403 | 0.018 | 5.91649E-72 | KO   | Mid1        | 0.385  |
| Nr3c1       | 5.02015E-76 | 1.651394768 | 0.731 | 0.124 | 1.55891E-71 | KO   | Nr3c1       | 0.607  |
| Cox17       | 5.051E-76   | 1.997156818 | 0.866 | 0.221 | 1.56849E-71 | KO   | Cox17       | 0.645  |
| Prkca       | 7.87362E-76 | 1.795410342 | 0.639 | 0.088 | 2.44499E-71 | KO   | Prkca       | 0.551  |
| Nfil3       | 2.92652E-75 | 1.646526773 | 0.605 | 0.076 | 9.08771E-71 | KO   | Nfil3       | 0.529  |
| Cd27        | 3.6052E-75  | 1.730716077 | 0.739 | 0.13  | 1.11952E-70 | KO   | Cd27        | 0.609  |
| Nabp1       | 4.08142E-75 | 1.719410677 | 0.807 | 0.16  | 1.2674E-70  | KO   | Nabp1       | 0.647  |
| Arsb        | 1.06522E-74 | 1.966392818 | 0.697 | 0.118 | 3.30782E-70 | KO   | Arsb        | 0.579  |
| Hivep2      | 4.82619E-74 | 2.223702519 | 0.5   | 0.044 | 1.49868E-69 | KO   | Hivep2      | 0.456  |
| Ddx17       | 2.96182E-73 | 1.428936643 | 0.798 | 0.155 | 9.19735E-69 | KO   | Ddx17       | 0.643  |
| Itgb2       | 3.04909E-73 | 1.580704503 | 0.819 | 0.175 | 9.46834E-69 | KO   | Itgb2       | 0.644  |
| 2900026A02R | 7.98663E-73 | 4.032032341 | 0.353 | 0.011 | 2.48009E-68 | KO   | 2900026A02R | 0.342  |
| Pabpc1      | 6.83377E-72 | 1.402296257 | 0.971 | 0.601 | 2.12209E-67 | KO   | Pabpc1      | 0.37   |
| Sytl2       | 2.10718E-71 | 1.790459398 | 0.588 | 0.075 | 6.54342E-67 | KO   | Sytl2       | 0.513  |
| Tnfaip3     | 2.29381E-71 | 1.777062226 | 0.95  | 0.295 | 7.12298E-67 | KO   | Tnfaip3     | 0.655  |
| Rbpj        | 3.93893E-71 | 1.880340291 | 0.832 | 0.207 | 1.22316E-66 | KO   | Rbpj        | 0.625  |
| Sorl1       | 4.74145E-71 | 1.50496094  | 0.58  | 0.071 | 1.47236E-66 | KO   | Sorl1       | 0.509  |
| Lag3        | 5.65113E-71 | 1.978886782 | 0.836 | 0.207 | 1.75484E-66 | KO   | Lag3        | 0.629  |
| Pdcd6ip     | 2.81239E-70 | 1.437782608 | 0.786 | 0.156 | 8.73331E-66 | KO   | Pdcd6ip     | 0.63   |
| Dusp4       | 8.07368E-70 | 1.976886279 | 0.5   | 0.05  | 2.50712E-65 | KO   | Dusp4       | 0.45   |
| Ifng        | 9.47818E-70 | 3.01989345  | 0.563 | 0.076 | 2.94326E-65 | KO   | Ifng        | 0.487  |
| Pdcd1       | 1.29326E-69 | 2.145783509 | 0.794 | 0.214 | 4.01597E-65 | KO   | Pdcd1       | 0.58   |

|           |             |             |       |       |             |    |           |       |
|-----------|-------------|-------------|-------|-------|-------------|----|-----------|-------|
| B2m       | 1.42625E-69 | 1.100378486 | 0.987 | 0.848 | 4.42892E-65 | KO | B2m       | 0.139 |
| Sec62     | 1.60811E-69 | 1.438606976 | 0.798 | 0.164 | 4.99366E-65 | KO | Sec62     | 0.634 |
| Irf1      | 1.7604E-69  | 1.68269656  | 0.651 | 0.103 | 5.46656E-65 | KO | Irf1      | 0.548 |
| Hopx      | 2.97247E-69 | 1.720059994 | 0.676 | 0.113 | 9.2304E-65  | KO | Hopx      | 0.563 |
| Tagap1    | 5.94075E-69 | 3.035774257 | 0.357 | 0.014 | 1.84478E-64 | KO | Tagap1    | 0.343 |
| Kdm2b     | 9.49555E-69 | 1.74142401  | 0.685 | 0.121 | 2.94865E-64 | KO | Kdm2b     | 0.564 |
| Samsn1    | 1.0544E-68  | 1.810271936 | 0.819 | 0.2   | 3.27423E-64 | KO | Samsn1    | 0.619 |
| Smad7     | 1.61698E-68 | 1.679151605 | 0.756 | 0.153 | 5.02121E-64 | KO | Smad7     | 0.603 |
| Stat1     | 2.24303E-68 | 1.880060075 | 0.765 | 0.163 | 6.96527E-64 | KO | Stat1     | 0.602 |
| Gm10036   | 1.22116E-67 | 2.579676747 | 0.378 | 0.02  | 3.79205E-63 | KO | Gm10036   | 0.358 |
| Kras      | 1.37334E-67 | 1.42887621  | 0.618 | 0.093 | 4.26464E-63 | KO | Kras      | 0.525 |
| Gstp1     | 3.29332E-67 | 1.386362497 | 0.609 | 0.088 | 1.02268E-62 | KO | Gstp1     | 0.521 |
| Atp8b2    | 5.95136E-67 | 1.808435438 | 0.412 | 0.029 | 1.84808E-62 | KO | Atp8b2    | 0.383 |
| Sik1      | 7.66918E-67 | 1.491788018 | 0.592 | 0.083 | 2.38151E-62 | KO | Sik1      | 0.509 |
| Inpp4b    | 9.0022E-67  | 1.602367322 | 0.718 | 0.136 | 2.79545E-62 | KO | Inpp4b    | 0.582 |
| Ubash3b   | 2.31738E-66 | 1.634448735 | 0.618 | 0.094 | 7.19615E-62 | KO | Ubash3b   | 0.524 |
| Map3k1    | 3.08355E-66 | 1.427043617 | 0.647 | 0.104 | 9.57533E-62 | KO | Map3k1    | 0.543 |
| Nfkb1     | 3.17185E-66 | 1.777678345 | 0.798 | 0.188 | 9.84954E-62 | KO | Nfkb1     | 0.61  |
| Mob1a     | 4.11864E-66 | 1.310013755 | 0.769 | 0.155 | 1.27896E-61 | KO | Mob1a     | 0.614 |
| Pde4d     | 4.16165E-66 | 1.616078075 | 0.471 | 0.046 | 1.29232E-61 | KO | Pde4d     | 0.425 |
| Lasp1     | 9.33159E-66 | 1.251525091 | 0.668 | 0.112 | 2.89774E-61 | KO | Lasp1     | 0.556 |
| Prf1      | 1.96779E-65 | 2.230868768 | 0.714 | 0.166 | 6.11058E-61 | KO | Prf1      | 0.548 |
| Rbms1     | 2.89804E-65 | 1.548759292 | 0.761 | 0.16  | 8.99928E-61 | KO | Rbms1     | 0.601 |
| Ifnar1    | 6.17438E-65 | 1.116284203 | 0.697 | 0.123 | 1.91733E-60 | KO | Ifnar1    | 0.574 |
| Tapbpl    | 9.01785E-65 | 1.771473954 | 0.508 | 0.06  | 2.80031E-60 | KO | Tapbpl    | 0.448 |
| Ccl4      | 1.16896E-64 | 2.463078565 | 0.647 | 0.127 | 3.62998E-60 | KO | Ccl4      | 0.52  |
| Vgll4     | 1.28157E-64 | 1.184987099 | 0.761 | 0.152 | 3.97965E-60 | KO | Vgll4     | 0.609 |
| Eif3j2    | 1.95304E-64 | 4.800827672 | 0.269 | 0.001 | 6.06479E-60 | KO | Eif3j2    | 0.268 |
| Acsl5     | 2.09448E-64 | 1.483964844 | 0.618 | 0.099 | 6.504E-60   | KO | Acsl5     | 0.519 |
| Sla       | 2.24468E-64 | 1.495249598 | 0.727 | 0.145 | 6.9704E-60  | KO | Sla       | 0.582 |
| Mxi1      | 3.28402E-64 | 1.840406378 | 0.571 | 0.082 | 1.01979E-59 | KO | Mxi1      | 0.489 |
| Areg      | 5.94736E-64 | 5.941379975 | 0.353 | 0.021 | 1.84683E-59 | KO | Areg      | 0.332 |
| Ctcf      | 6.98599E-64 | 1.401091438 | 0.664 | 0.118 | 2.16936E-59 | KO | Ctcf      | 0.546 |
| Gadd45b   | 7.46818E-64 | 2.230252396 | 0.681 | 0.145 | 2.31909E-59 | KO | Gadd45b   | 0.536 |
| Tm6sf1    | 1.04229E-63 | 1.825782774 | 0.513 | 0.063 | 3.23662E-59 | KO | Tm6sf1    | 0.45  |
| Bend4     | 1.83998E-63 | 1.613768289 | 0.5   | 0.058 | 5.7137E-59  | KO | Bend4     | 0.442 |
| Ap2b1     | 2.35184E-63 | 1.242468918 | 0.588 | 0.088 | 7.30318E-59 | KO | Ap2b1     | 0.5   |
| Fgl2      | 2.69202E-63 | 1.63232646  | 0.601 | 0.093 | 8.35953E-59 | KO | Fgl2      | 0.508 |
| Cbx4      | 6.94116E-63 | 1.436761842 | 0.567 | 0.083 | 2.15544E-58 | KO | Cbx4      | 0.484 |
| Irf8      | 7.15042E-63 | 2.112311063 | 0.748 | 0.192 | 2.22042E-58 | KO | Irf8      | 0.556 |
| Snx9      | 1.02159E-62 | 2.440816721 | 0.45  | 0.045 | 3.17235E-58 | KO | Snx9      | 0.405 |
| Itpkb     | 1.97856E-62 | 1.182291704 | 0.718 | 0.135 | 6.14403E-58 | KO | Itpkb     | 0.583 |
| Anxa11    | 2.56668E-62 | 1.215270295 | 0.651 | 0.111 | 7.97031E-58 | KO | Anxa11    | 0.54  |
| Dock2     | 3.12398E-62 | 1.309295366 | 0.874 | 0.215 | 9.7009E-58  | KO | Dock2     | 0.659 |
| Cst7      | 3.72953E-62 | 1.668269092 | 0.748 | 0.164 | 1.15813E-57 | KO | Cst7      | 0.584 |
| Prr5l     | 4.82153E-62 | 3.073848589 | 0.311 | 0.011 | 1.49723E-57 | KO | Prr5l     | 0.3   |
| Srpr      | 4.83528E-62 | 1.493505875 | 0.542 | 0.075 | 1.5015E-57  | KO | Srpr      | 0.467 |
| Cish      | 1.96132E-61 | 1.892381798 | 0.517 | 0.068 | 6.0905E-57  | KO | Cish      | 0.449 |
| Chd7      | 3.00572E-61 | 1.272529037 | 0.655 | 0.115 | 9.33367E-57 | KO | Chd7      | 0.54  |
| Rel       | 4.17123E-61 | 2.23107356  | 0.592 | 0.104 | 1.29529E-56 | KO | Rel       | 0.488 |
| Serpinb6b | 4.20245E-61 | 1.955157494 | 0.681 | 0.143 | 1.30499E-56 | KO | Serpinb6b | 0.538 |

|          |             |             |       |       |             |    |          |       |
|----------|-------------|-------------|-------|-------|-------------|----|----------|-------|
| Sh3kbp1  | 8.35232E-61 | 1.35712843  | 0.744 | 0.162 | 2.59365E-56 | KO | Sh3kbp1  | 0.582 |
| Ier5l    | 1.80204E-60 | 1.888474761 | 0.634 | 0.117 | 5.59586E-56 | KO | Ier5l    | 0.517 |
| Orai1    | 1.91683E-60 | 1.369628551 | 0.639 | 0.114 | 5.95234E-56 | KO | Orai1    | 0.525 |
| Gimap8   | 1.99824E-60 | 2.239999142 | 0.429 | 0.042 | 6.20514E-56 | KO | Gimap8   | 0.387 |
| Rpl27    | 2.11601E-60 | 1.377674231 | 0.937 | 0.573 | 6.57085E-56 | KO | Rpl27    | 0.364 |
| Abcb9    | 2.41445E-60 | 2.60294311  | 0.361 | 0.024 | 7.4976E-56  | KO | Abcb9    | 0.337 |
| Gata3    | 3.70542E-60 | 2.276113837 | 0.458 | 0.052 | 1.15064E-55 | KO | Gata3    | 0.406 |
| Cdc5l    | 5.42666E-60 | 1.290845368 | 0.609 | 0.102 | 1.68514E-55 | KO | Cdc5l    | 0.507 |
| Gm8186   | 7.03552E-60 | 1.392974219 | 0.613 | 0.108 | 2.18474E-55 | KO | Gm8186   | 0.505 |
| Nfkbid   | 9.26134E-60 | 2.707586879 | 0.387 | 0.032 | 2.87592E-55 | KO | Nfkbid   | 0.355 |
| Zc3h12a  | 9.38284E-60 | 1.499261723 | 0.441 | 0.045 | 2.91365E-55 | KO | Zc3h12a  | 0.396 |
| Was      | 9.39691E-60 | 1.39221523  | 0.45  | 0.048 | 2.91802E-55 | KO | Was      | 0.402 |
| Ezr      | 1.24074E-59 | 1.487063429 | 0.836 | 0.224 | 3.85287E-55 | KO | Ezr      | 0.612 |
| Glud1    | 2.35608E-59 | 1.272119902 | 0.777 | 0.178 | 7.31634E-55 | KO | Glud1    | 0.599 |
| Sla2     | 3.55211E-59 | 1.564984288 | 0.504 | 0.067 | 1.10304E-54 | KO | Sla2     | 0.437 |
| Mlec     | 4.31275E-59 | 1.320947116 | 0.618 | 0.11  | 1.33924E-54 | KO | Mlec     | 0.508 |
| Ier3ip1  | 4.37948E-59 | 1.278479542 | 0.769 | 0.172 | 1.35996E-54 | KO | Ier3ip1  | 0.597 |
| Actg1    | 4.71725E-59 | 1.163171161 | 0.979 | 0.897 | 1.46485E-54 | KO | Actg1    | 0.082 |
| Nucb1    | 4.75252E-59 | 1.118381046 | 0.773 | 0.174 | 1.4758E-54  | KO | Nucb1    | 0.599 |
| Man2b1   | 4.95497E-59 | 1.157685971 | 0.655 | 0.122 | 1.53867E-54 | KO | Man2b1   | 0.533 |
| Itk      | 5.5012E-59  | 1.276647408 | 0.828 | 0.206 | 1.70829E-54 | KO | Itk      | 0.622 |
| Numa1    | 7.96646E-59 | 1.465946787 | 0.576 | 0.091 | 2.47382E-54 | KO | Numa1    | 0.485 |
| Auh      | 8.46795E-59 | 1.136483375 | 0.534 | 0.075 | 2.62955E-54 | KO | Auh      | 0.459 |
| Stk39    | 1.39511E-58 | 1.488019975 | 0.559 | 0.088 | 4.33224E-54 | KO | Stk39    | 0.471 |
| Dennd4a  | 1.47285E-58 | 1.683689673 | 0.929 | 0.324 | 4.57365E-54 | KO | Dennd4a  | 0.605 |
| Entpd1   | 1.51939E-58 | 1.700575374 | 0.483 | 0.061 | 4.71815E-54 | KO | Entpd1   | 0.422 |
| Ppp3cc   | 1.54842E-58 | 1.6110359   | 0.441 | 0.047 | 4.80831E-54 | KO | Ppp3cc   | 0.394 |
| Cox20    | 2.92081E-58 | 1.400964169 | 0.63  | 0.116 | 9.07001E-54 | KO | Cox20    | 0.514 |
| Tox      | 2.98334E-58 | 1.601595296 | 0.744 | 0.177 | 9.26417E-54 | KO | Tox      | 0.567 |
| P2ry10   | 3.02844E-58 | 0.956054448 | 0.786 | 0.173 | 9.40421E-54 | KO | P2ry10   | 0.613 |
| Lrmp     | 5.47857E-58 | 1.209232492 | 0.618 | 0.108 | 1.70126E-53 | KO | Lrmp     | 0.51  |
| Tob2     | 9.6798E-58  | 2.199310731 | 0.466 | 0.059 | 3.00587E-53 | KO | Tob2     | 0.407 |
| B4galt1  | 1.10019E-57 | 1.150317616 | 0.601 | 0.102 | 3.41642E-53 | KO | B4galt1  | 0.499 |
| Ppp1r18  | 1.90988E-57 | 1.328338854 | 0.718 | 0.152 | 5.93074E-53 | KO | Ppp1r18  | 0.566 |
| Bhlhe40  | 2.12602E-57 | 1.656901453 | 0.916 | 0.368 | 6.60192E-53 | KO | Bhlhe40  | 0.548 |
| Sfr1     | 3.94035E-57 | 1.311496848 | 0.702 | 0.156 | 1.2236E-52  | KO | Sfr1     | 0.546 |
| Csnk2a1  | 4.81955E-57 | 1.388665852 | 0.521 | 0.075 | 1.49661E-52 | KO | Csnk2a1  | 0.446 |
| Il2rg    | 5.89087E-57 | 1.184170363 | 0.794 | 0.187 | 1.82929E-52 | KO | Il2rg    | 0.607 |
| Slc7a1   | 5.9591E-57  | 1.656253277 | 0.487 | 0.066 | 1.85048E-52 | KO | Slc7a1   | 0.421 |
| Sept6    | 6.70041E-57 | 1.387659298 | 0.55  | 0.088 | 2.08068E-52 | KO | Sept6    | 0.462 |
| Tnfrsf9  | 6.76183E-57 | 1.659486996 | 0.878 | 0.332 | 2.09975E-52 | KO | Tnfrsf9  | 0.546 |
| Snhg6    | 1.07963E-56 | 1.589644029 | 0.454 | 0.055 | 3.35257E-52 | KO | Snhg6    | 0.399 |
| Diaph1   | 1.30919E-56 | 1.230012187 | 0.777 | 0.186 | 4.06544E-52 | KO | Diaph1   | 0.591 |
| Ccr5     | 1.31702E-56 | 1.58881494  | 0.639 | 0.127 | 4.08974E-52 | KO | Ccr5     | 0.512 |
| Rnaset2a | 1.53958E-56 | 2.168270069 | 0.324 | 0.018 | 4.78085E-52 | KO | Rnaset2a | 0.306 |
| Ppp1r15a | 1.65177E-56 | 1.213912204 | 0.542 | 0.083 | 5.12925E-52 | KO | Ppp1r15a | 0.459 |
| Cers4    | 1.65969E-56 | 1.413368816 | 0.546 | 0.086 | 5.15383E-52 | KO | Cers4    | 0.46  |
| Cxcr6    | 2.59641E-56 | 1.501696867 | 0.744 | 0.176 | 8.06263E-52 | KO | Cxcr6    | 0.568 |
| Nup98    | 3.43489E-56 | 0.985210211 | 0.571 | 0.093 | 1.06664E-51 | KO | Nup98    | 0.478 |
| B4galt5  | 3.83976E-56 | 1.30382227  | 0.483 | 0.064 | 1.19236E-51 | KO | B4galt5  | 0.419 |
| Csrnp1   | 4.15797E-56 | 1.595016246 | 0.454 | 0.055 | 1.29117E-51 | KO | Csrnp1   | 0.399 |

|               |             |             |       |       |             |    |               |       |
|---------------|-------------|-------------|-------|-------|-------------|----|---------------|-------|
| Il4ra         | 5.07452E-56 | 1.167200588 | 0.588 | 0.099 | 1.57579E-51 | KO | Il4ra         | 0.489 |
| Litaf         | 6.18594E-56 | 1.508863131 | 0.803 | 0.217 | 1.92092E-51 | KO | Litaf         | 0.586 |
| Crybg1        | 1.02154E-55 | 0.900461808 | 0.592 | 0.102 | 3.1722E-51  | KO | Crybg1        | 0.49  |
| Prrc2a        | 1.64926E-55 | 1.125298024 | 0.735 | 0.163 | 5.12144E-51 | KO | Prrc2a        | 0.572 |
| Zeb2          | 1.92255E-55 | 1.381180593 | 0.592 | 0.105 | 5.97008E-51 | KO | Zeb2          | 0.487 |
| Dctn4         | 2.29612E-55 | 1.18194114  | 0.521 | 0.078 | 7.13014E-51 | KO | Dctn4         | 0.443 |
| Isy1          | 4.04637E-55 | 1.416614244 | 0.622 | 0.12  | 1.25652E-50 | KO | Isy1          | 0.502 |
| Wdtn1         | 5.87078E-55 | 1.502572966 | 0.374 | 0.033 | 1.82305E-50 | KO | Wdtn1         | 0.341 |
| Tln1          | 7.69646E-55 | 1.175124187 | 0.777 | 0.195 | 2.38998E-50 | KO | Tln1          | 0.582 |
| Zc3hav1       | 9.95678E-55 | 1.135177111 | 0.832 | 0.221 | 3.09188E-50 | KO | Zc3hav1       | 0.611 |
| Osbpl3        | 1.09675E-54 | 1.376635254 | 0.601 | 0.112 | 3.40574E-50 | KO | Osbpl3        | 0.489 |
| Nlrc5         | 1.0989E-54  | 0.96400723  | 0.588 | 0.102 | 3.4124E-50  | KO | Nlrc5         | 0.486 |
| Btg3          | 1.13012E-54 | 1.960737692 | 0.374 | 0.034 | 3.50937E-50 | KO | Btg3          | 0.34  |
| Ost4          | 1.55487E-54 | 1.326889545 | 0.815 | 0.224 | 4.82833E-50 | KO | Ost4          | 0.591 |
| Pik3cd        | 1.62674E-54 | 1.318213062 | 0.601 | 0.112 | 5.05153E-50 | KO | Pik3cd        | 0.489 |
| Cyth4         | 1.66159E-54 | 1.071651817 | 0.685 | 0.141 | 5.15974E-50 | KO | Cyth4         | 0.544 |
| Zdhhc2        | 1.68597E-54 | 1.929819951 | 0.466 | 0.064 | 5.23545E-50 | KO | Zdhhc2        | 0.402 |
| Eea1          | 1.76405E-54 | 1.489202198 | 0.639 | 0.129 | 5.4779E-50  | KO | Eea1          | 0.51  |
| Cmip          | 1.80674E-54 | 1.189267281 | 0.529 | 0.083 | 5.61048E-50 | KO | Cmip          | 0.446 |
| Tap2          | 1.83169E-54 | 1.094382302 | 0.756 | 0.181 | 5.68793E-50 | KO | Tap2          | 0.575 |
| Cd8a          | 2.22603E-54 | 1.868094588 | 0.79  | 0.298 | 6.91249E-50 | KO | Cd8a          | 0.492 |
| Jak3          | 2.60408E-54 | 1.176730116 | 0.529 | 0.083 | 8.08644E-50 | KO | Jak3          | 0.446 |
| Sema4a        | 3.26922E-54 | 1.391675726 | 0.496 | 0.072 | 1.01519E-49 | KO | Sema4a        | 0.424 |
| Chst11        | 4.13969E-54 | 1.778638225 | 0.395 | 0.04  | 1.2855E-49  | KO | Chst11        | 0.355 |
| Il27ra        | 5.0173E-54  | 1.698983557 | 0.395 | 0.04  | 1.55802E-49 | KO | Il27ra        | 0.355 |
| Mettl23       | 5.56062E-54 | 1.00872205  | 0.71  | 0.153 | 1.72674E-49 | KO | Mettl23       | 0.557 |
| Esyt1         | 6.78235E-54 | 1.238750675 | 0.807 | 0.21  | 2.10612E-49 | KO | Esyt1         | 0.597 |
| Agfg1         | 7.0536E-54  | 1.080005448 | 0.714 | 0.162 | 2.19035E-49 | KO | Agfg1         | 0.552 |
| Ccnt1         | 7.59111E-54 | 1.085485349 | 0.613 | 0.113 | 2.35727E-49 | KO | Ccnt1         | 0.5   |
| Hdac1         | 9.29307E-54 | 1.3749765   | 0.643 | 0.132 | 2.88578E-49 | KO | Hdac1         | 0.511 |
| Tox4          | 1.04385E-53 | 1.132378757 | 0.576 | 0.102 | 3.24147E-49 | KO | Tox4          | 0.474 |
| Icam1         | 1.07642E-53 | 1.754749318 | 0.517 | 0.085 | 3.34262E-49 | KO | Icam1         | 0.432 |
| Icos          | 1.15923E-53 | 1.198866424 | 0.782 | 0.197 | 3.59975E-49 | KO | Icos          | 0.585 |
| Rgs3          | 1.26166E-53 | 1.296871681 | 0.513 | 0.079 | 3.91784E-49 | KO | Rgs3          | 0.434 |
| Fasl          | 1.2642E-53  | 1.598080335 | 0.391 | 0.039 | 3.92571E-49 | KO | Fasl          | 0.352 |
| Tbx21         | 1.5547E-53  | 1.578955019 | 0.445 | 0.056 | 4.82781E-49 | KO | Tbx21         | 0.389 |
| Gpd2          | 1.65071E-53 | 1.599087225 | 0.466 | 0.064 | 5.12595E-49 | KO | Gpd2          | 0.402 |
| Stk10         | 2.00378E-53 | 1.083992811 | 0.5   | 0.074 | 6.22233E-49 | KO | Stk10         | 0.426 |
| Dgat1         | 2.15453E-53 | 1.509108955 | 0.79  | 0.204 | 6.69047E-49 | KO | Dgat1         | 0.586 |
| Thy1          | 2.82657E-53 | 1.518750895 | 0.929 | 0.379 | 8.77735E-49 | KO | Thy1          | 0.55  |
| Uhrf2         | 3.00583E-53 | 1.58411895  | 0.853 | 0.292 | 9.334E-49   | KO | Uhrf2         | 0.561 |
| 1810037117Ril | 3.40535E-53 | 1.503184527 | 0.878 | 0.305 | 1.05746E-48 | KO | 1810037117Ril | 0.573 |
| Thap12        | 3.71806E-53 | 1.225264576 | 0.576 | 0.104 | 1.15457E-48 | KO | Thap12        | 0.472 |
| Fmnl1         | 3.93397E-53 | 1.20635086  | 0.828 | 0.236 | 1.22162E-48 | KO | Fmnl1         | 0.592 |
| Creb3l2       | 4.09327E-53 | 1.922017409 | 0.387 | 0.039 | 1.27108E-48 | KO | Creb3l2       | 0.348 |
| Arid5b        | 6.91614E-53 | 1.255579182 | 0.521 | 0.083 | 2.14767E-48 | KO | Arid5b        | 0.438 |
| Stat3         | 7.9509E-53  | 1.478408716 | 0.92  | 0.457 | 2.46899E-48 | KO | Stat3         | 0.463 |
| Dnajc1        | 9.12478E-53 | 1.046888009 | 0.613 | 0.115 | 2.83352E-48 | KO | Dnajc1        | 0.498 |
| Ttpal         | 1.26192E-52 | 1.742647191 | 0.336 | 0.026 | 3.91862E-48 | KO | Ttpal         | 0.31  |
| Baz1a         | 1.4758E-52  | 1.443644473 | 0.681 | 0.154 | 4.5828E-48  | KO | Baz1a         | 0.527 |
| Slc26a2       | 1.77783E-52 | 1.596157571 | 0.395 | 0.042 | 5.5207E-48  | KO | Slc26a2       | 0.353 |

|          |             |             |       |       |             |    |          |       |
|----------|-------------|-------------|-------|-------|-------------|----|----------|-------|
| Klrc2    | 1.9763E-52  | 1.188152731 | 0.517 | 0.082 | 6.13701E-48 | KO | Klrc2    | 0.435 |
| Ppp1r12a | 2.10916E-52 | 0.951253264 | 0.752 | 0.18  | 6.54959E-48 | KO | Ppp1r12a | 0.572 |
| Map2k3   | 2.14829E-52 | 1.070005299 | 0.626 | 0.124 | 6.67107E-48 | KO | Map2k3   | 0.502 |
| Twsg1    | 2.71929E-52 | 2.029964478 | 0.378 | 0.038 | 8.44421E-48 | KO | Twsg1    | 0.34  |
| Hacd2    | 2.90002E-52 | 1.983638232 | 0.34  | 0.028 | 9.00543E-48 | KO | Hacd2    | 0.312 |
| Atp2b4   | 3.14401E-52 | 1.064861177 | 0.538 | 0.088 | 9.76308E-48 | KO | Atp2b4   | 0.45  |
| Csf1     | 3.94683E-52 | 2.171190958 | 0.391 | 0.042 | 1.22561E-47 | KO | Csf1     | 0.349 |
| Grccl10  | 4.78242E-52 | 0.874114799 | 0.517 | 0.082 | 1.48509E-47 | KO | Grccl10  | 0.435 |
| Gxylt1   | 6.11509E-52 | 1.215767675 | 0.555 | 0.097 | 1.89892E-47 | KO | Gxylt1   | 0.458 |
| Rnf125   | 6.91643E-52 | 1.18667691  | 0.517 | 0.083 | 2.14776E-47 | KO | Rnf125   | 0.434 |
| Myo1f    | 7.40715E-52 | 1.634875385 | 0.441 | 0.058 | 2.30014E-47 | KO | Myo1f    | 0.383 |
| Erp44    | 7.51719E-52 | 1.100325538 | 0.63  | 0.127 | 2.33431E-47 | KO | Erp44    | 0.503 |
| Tnrc18   | 9.16643E-52 | 1.360192086 | 0.382 | 0.039 | 2.84645E-47 | KO | Tnrc18   | 0.343 |
| Klf6     | 9.61375E-52 | 1.47432793  | 0.84  | 0.259 | 2.98536E-47 | KO | Klf6     | 0.581 |
| Dusp10   | 1.03566E-51 | 2.041917671 | 0.374 | 0.038 | 3.21602E-47 | KO | Dusp10   | 0.336 |
| Adipor2  | 1.25927E-51 | 1.171481316 | 0.613 | 0.122 | 3.91042E-47 | KO | Adipor2  | 0.491 |
| Klrc1    | 1.26506E-51 | 1.353257823 | 0.681 | 0.159 | 3.9284E-47  | KO | Klrc1    | 0.522 |
| Itih5    | 1.28076E-51 | 2.07175313  | 0.277 | 0.013 | 3.97715E-47 | KO | Itih5    | 0.264 |
| Smc3     | 1.45961E-51 | 1.258141577 | 0.651 | 0.14  | 4.53253E-47 | KO | Smc3     | 0.511 |
| Rnf157   | 1.46327E-51 | 1.812906301 | 0.458 | 0.065 | 4.54391E-47 | KO | Rnf157   | 0.393 |
| Rasal3   | 1.60305E-51 | 0.968469695 | 0.626 | 0.121 | 4.97796E-47 | KO | Rasal3   | 0.505 |
| Zap70    | 1.70969E-51 | 1.077873268 | 0.798 | 0.204 | 5.3091E-47  | KO | Zap70    | 0.594 |
| Trbc2    | 1.7167E-51  | 1.428764382 | 0.941 | 0.551 | 5.33087E-47 | KO | Trbc2    | 0.39  |
| Dusp5    | 1.75677E-51 | 1.239115836 | 0.702 | 0.163 | 5.45531E-47 | KO | Dusp5    | 0.539 |
| Fam102a  | 2.46725E-51 | 1.305065666 | 0.588 | 0.111 | 7.66157E-47 | KO | Fam102a  | 0.477 |
| Nedd9    | 2.55607E-51 | 1.003385352 | 0.626 | 0.123 | 7.93737E-47 | KO | Nedd9    | 0.503 |
| Uap1     | 2.59473E-51 | 1.643514237 | 0.475 | 0.071 | 8.05742E-47 | KO | Uap1     | 0.404 |
| Sp110    | 2.67814E-51 | 1.012723033 | 0.563 | 0.1   | 8.31642E-47 | KO | Sp110    | 0.463 |
| Rock1    | 3.49592E-51 | 1.097681009 | 0.748 | 0.187 | 1.08559E-46 | KO | Rock1    | 0.561 |
| Top1     | 3.94392E-51 | 1.037895469 | 0.727 | 0.169 | 1.2247E-46  | KO | Top1     | 0.558 |
| Lin54    | 3.99937E-51 | 1.790698259 | 0.483 | 0.076 | 1.24192E-46 | KO | Lin54    | 0.407 |
| S100a4   | 5.10613E-51 | 1.614034011 | 0.916 | 0.493 | 1.58561E-46 | KO | S100a4   | 0.423 |
| Chd4     | 5.21456E-51 | 1.198286467 | 0.84  | 0.247 | 1.61928E-46 | KO | Chd4     | 0.593 |
| Skil     | 5.92746E-51 | 1.143563541 | 0.588 | 0.112 | 1.84066E-46 | KO | Skil     | 0.476 |
| Pde4b    | 6.89091E-51 | 1.531718526 | 0.492 | 0.078 | 2.13984E-46 | KO | Pde4b    | 0.414 |
| Nsmaf    | 7.92251E-51 | 0.788830438 | 0.626 | 0.125 | 2.46018E-46 | KO | Nsmaf    | 0.501 |
| Lfng     | 7.94886E-51 | 1.575541886 | 0.433 | 0.057 | 2.46836E-46 | KO | Lfng     | 0.376 |
| Zbtb1    | 8.88934E-51 | 1.355777382 | 0.445 | 0.061 | 2.76041E-46 | KO | Zbtb1    | 0.384 |
| Elmo1    | 1.28477E-50 | 1.303460821 | 0.605 | 0.123 | 3.98961E-46 | KO | Elmo1    | 0.482 |
| Rsrc2    | 1.33876E-50 | 1.003874956 | 0.765 | 0.189 | 4.15724E-46 | KO | Rsrc2    | 0.576 |
| Ide      | 1.47405E-50 | 1.387321975 | 0.437 | 0.059 | 4.57737E-46 | KO | Ide      | 0.378 |
| Emsy     | 1.77034E-50 | 1.220097218 | 0.5   | 0.08  | 5.49744E-46 | KO | Emsy     | 0.42  |
| Dhrs7    | 1.77476E-50 | 1.051612979 | 0.462 | 0.065 | 5.51116E-46 | KO | Dhrs7    | 0.397 |
| Stk4     | 1.87113E-50 | 0.882052865 | 0.668 | 0.142 | 5.81042E-46 | KO | Stk4     | 0.526 |
| Rpa3     | 2.53737E-50 | 1.556264909 | 0.521 | 0.093 | 7.87928E-46 | KO | Rpa3     | 0.428 |
| Gramd3   | 2.6322E-50  | 1.389223588 | 0.58  | 0.112 | 8.17377E-46 | KO | Gramd3   | 0.468 |
| Itgal    | 2.74332E-50 | 1.303406704 | 0.832 | 0.255 | 8.51882E-46 | KO | Itgal    | 0.577 |
| Atg12    | 2.82147E-50 | 1.616688293 | 0.408 | 0.05  | 8.76151E-46 | KO | Atg12    | 0.358 |
| Pak2     | 3.1372E-50  | 1.157406786 | 0.79  | 0.218 | 9.74195E-46 | KO | Pak2     | 0.572 |
| Il2rb    | 3.62033E-50 | 1.38134281  | 0.937 | 0.528 | 1.12422E-45 | KO | Il2rb    | 0.409 |
| Prpf8    | 3.70603E-50 | 1.032227241 | 0.622 | 0.13  | 1.15083E-45 | KO | Prpf8    | 0.492 |

|             |             |             |       |       |             |    |             |       |
|-------------|-------------|-------------|-------|-------|-------------|----|-------------|-------|
| Stap1       | 3.71592E-50 | 1.295776221 | 0.483 | 0.076 | 1.15391E-45 | KO | Stap1       | 0.407 |
| Sp100       | 4.42027E-50 | 1.01029826  | 0.697 | 0.164 | 1.37263E-45 | KO | Sp100       | 0.533 |
| Cetn2       | 4.85224E-50 | 1.124039914 | 0.592 | 0.114 | 1.50676E-45 | KO | Cetn2       | 0.478 |
| Grb2        | 6.0993E-50  | 1.204020633 | 0.752 | 0.195 | 1.89402E-45 | KO | Grb2        | 0.557 |
| Spn         | 8.48325E-50 | 0.960205057 | 0.739 | 0.18  | 2.6343E-45  | KO | Spn         | 0.559 |
| Nfkbiz      | 1.81141E-49 | 1.448265297 | 0.634 | 0.141 | 5.62498E-45 | KO | Nfkbiz      | 0.493 |
| Fyn         | 1.97015E-49 | 0.97000333  | 0.765 | 0.193 | 6.1179E-45  | KO | Fyn         | 0.572 |
| Fam129a     | 2.18657E-49 | 1.280674642 | 0.508 | 0.087 | 6.78995E-45 | KO | Fam129a     | 0.421 |
| Ralbp1      | 2.35855E-49 | 1.098601004 | 0.563 | 0.106 | 7.32399E-45 | KO | Ralbp1      | 0.457 |
| Crbn        | 2.37661E-49 | 1.214604914 | 0.622 | 0.136 | 7.38008E-45 | KO | Crbn        | 0.486 |
| Rap1gds1    | 2.3944E-49  | 0.705298156 | 0.471 | 0.069 | 7.43534E-45 | KO | Rap1gds1    | 0.402 |
| Glipr2      | 2.75516E-49 | 1.040374772 | 0.525 | 0.09  | 8.55559E-45 | KO | Glipr2      | 0.435 |
| Uhmk1       | 3.3368E-49  | 0.91208099  | 0.555 | 0.1   | 1.03618E-44 | KO | Uhmk1       | 0.455 |
| Sdf2        | 3.51565E-49 | 0.736519782 | 0.576 | 0.107 | 1.09171E-44 | KO | Sdf2        | 0.469 |
| Ifrd1       | 3.77303E-49 | 1.312994937 | 0.651 | 0.152 | 1.17164E-44 | KO | Ifrd1       | 0.499 |
| Rpl27-ps3   | 3.94111E-49 | 1.080928521 | 0.504 | 0.084 | 1.22383E-44 | KO | Rpl27-ps3   | 0.42  |
| Gng2        | 4.13243E-49 | 1.286022907 | 0.765 | 0.214 | 1.28325E-44 | KO | Gng2        | 0.551 |
| Plekha2     | 4.15107E-49 | 0.894735685 | 0.681 | 0.156 | 1.28903E-44 | KO | Plekha2     | 0.525 |
| Igf2r       | 4.62358E-49 | 1.341351038 | 0.466 | 0.071 | 1.43576E-44 | KO | Igf2r       | 0.395 |
| Gzmb        | 4.66214E-49 | 1.907543261 | 0.739 | 0.249 | 1.44773E-44 | KO | Gzmb        | 0.49  |
| Znrf2       | 6.49976E-49 | 0.817457966 | 0.563 | 0.105 | 2.01837E-44 | KO | Znrf2       | 0.458 |
| Tgif1       | 7.27787E-49 | 0.976589308 | 0.508 | 0.086 | 2.26E-44    | KO | Tgif1       | 0.422 |
| Ubxn11      | 7.34573E-49 | 1.396721828 | 0.378 | 0.042 | 2.28107E-44 | KO | Ubxn11      | 0.336 |
| Elk3        | 7.68587E-49 | 1.742382901 | 0.462 | 0.073 | 2.38669E-44 | KO | Elk3        | 0.389 |
| Lta4h       | 8.50877E-49 | 1.055175983 | 0.508 | 0.087 | 2.64223E-44 | KO | Lta4h       | 0.421 |
| Ugcg        | 8.64802E-49 | 1.150310569 | 0.735 | 0.188 | 2.68547E-44 | KO | Ugcg        | 0.547 |
| Adora2a     | 8.89428E-49 | 1.874666214 | 0.408 | 0.053 | 2.76194E-44 | KO | Adora2a     | 0.355 |
| Lrrc8c      | 1.09691E-48 | 1.391974122 | 0.466 | 0.072 | 3.40623E-44 | KO | Lrrc8c      | 0.394 |
| Atp8b4      | 1.11438E-48 | 1.123591628 | 0.517 | 0.091 | 3.46048E-44 | KO | Atp8b4      | 0.426 |
| Ahsa1       | 1.25106E-48 | 1.098385311 | 0.605 | 0.125 | 3.8849E-44  | KO | Ahsa1       | 0.48  |
| Acsl4       | 1.34051E-48 | 1.168250555 | 0.487 | 0.079 | 4.16269E-44 | KO | Acsl4       | 0.408 |
| Med14       | 1.48422E-48 | 1.006455024 | 0.479 | 0.076 | 4.60893E-44 | KO | Med14       | 0.403 |
| Usp25       | 1.51067E-48 | 1.066420399 | 0.597 | 0.122 | 4.69109E-44 | KO | Usp25       | 0.475 |
| Selplg      | 1.51736E-48 | 1.299039811 | 0.916 | 0.353 | 4.71186E-44 | KO | Selplg      | 0.563 |
| Copb2       | 1.55926E-48 | 0.9420181   | 0.571 | 0.112 | 4.84196E-44 | KO | Copb2       | 0.459 |
| Dusp1       | 1.58121E-48 | 1.177840329 | 0.828 | 0.249 | 4.91013E-44 | KO | Dusp1       | 0.579 |
| 4930523C07R | 1.60052E-48 | 0.946236065 | 0.752 | 0.189 | 4.97008E-44 | KO | 4930523C07R | 0.563 |
| Smarcc1     | 1.7313E-48  | 1.400327021 | 0.521 | 0.093 | 5.37619E-44 | KO | Smarcc1     | 0.428 |
| Irf2        | 1.77224E-48 | 0.798540104 | 0.517 | 0.088 | 5.50335E-44 | KO | Irf2        | 0.429 |
| Mxd1        | 1.81781E-48 | 1.057715625 | 0.542 | 0.098 | 5.64484E-44 | KO | Mxd1        | 0.444 |
| Aida        | 2.13321E-48 | 1.280999075 | 0.387 | 0.045 | 6.62425E-44 | KO | Aida        | 0.342 |
| Msi2        | 2.63998E-48 | 0.941447132 | 0.693 | 0.163 | 8.19794E-44 | KO | Msi2        | 0.53  |
| Gm19585     | 2.91215E-48 | 1.418579953 | 0.454 | 0.07  | 9.04309E-44 | KO | Gm19585     | 0.384 |
| Sec23b      | 3.51875E-48 | 1.182356923 | 0.504 | 0.086 | 1.09268E-43 | KO | Sec23b      | 0.418 |
| Anapc11     | 3.54965E-48 | 1.009622271 | 0.601 | 0.121 | 1.10227E-43 | KO | Anapc11     | 0.48  |
| Sdhd        | 4.38447E-48 | 1.01885965  | 0.609 | 0.127 | 1.36151E-43 | KO | Sdhd        | 0.482 |
| Cdk6        | 5.35783E-48 | 1.428550882 | 0.761 | 0.221 | 1.66377E-43 | KO | Cdk6        | 0.54  |
| Larp7       | 6.30066E-48 | 1.249763366 | 0.517 | 0.093 | 1.95654E-43 | KO | Larp7       | 0.424 |
| Dgkd        | 6.49592E-48 | 1.155149598 | 0.382 | 0.044 | 2.01718E-43 | KO | Dgkd        | 0.338 |
| Glo1        | 6.99999E-48 | 0.9170508   | 0.588 | 0.119 | 2.17371E-43 | KO | Glo1        | 0.469 |
| Ndfip1      | 8.49792E-48 | 1.044801791 | 0.786 | 0.215 | 2.63886E-43 | KO | Ndfip1      | 0.571 |

|          |             |             |       |       |             |    |          |       |
|----------|-------------|-------------|-------|-------|-------------|----|----------|-------|
| Prkcq    | 8.71895E-48 | 0.701345418 | 0.441 | 0.062 | 2.7075E-43  | KO | Prkcq    | 0.379 |
| Pigs     | 9.22229E-48 | 1.263982767 | 0.45  | 0.067 | 2.8638E-43  | KO | Pigs     | 0.383 |
| Ep400    | 9.50296E-48 | 0.922703482 | 0.576 | 0.113 | 2.95095E-43 | KO | Ep400    | 0.463 |
| Iqgap1   | 9.61194E-48 | 1.308498406 | 0.908 | 0.35  | 2.9848E-43  | KO | Iqgap1   | 0.558 |
| Metrn1   | 1.26377E-47 | 1.162478536 | 0.374 | 0.042 | 3.92438E-43 | KO | Metrn1   | 0.332 |
| Hcfc1    | 1.29596E-47 | 1.459763385 | 0.471 | 0.077 | 4.02434E-43 | KO | Hcfc1    | 0.394 |
| Tmed5    | 1.39097E-47 | 1.043640106 | 0.697 | 0.17  | 4.31937E-43 | KO | Tmed5    | 0.527 |
| Usp38    | 1.39725E-47 | 1.004645909 | 0.475 | 0.076 | 4.33887E-43 | KO | Usp38    | 0.399 |
| Nfkb1a   | 2.31799E-47 | 1.886045994 | 0.836 | 0.336 | 7.19805E-43 | KO | Nfkb1a   | 0.5   |
| Capza1   | 2.62864E-47 | 0.959355978 | 0.824 | 0.233 | 8.16273E-43 | KO | Capza1   | 0.591 |
| Golph3   | 2.78568E-47 | 1.119409262 | 0.542 | 0.103 | 8.65036E-43 | KO | Golph3   | 0.439 |
| Ppm1h    | 2.9471E-47  | 1.203962036 | 0.395 | 0.05  | 9.15162E-43 | KO | Ppm1h    | 0.345 |
| Mef2d    | 3.04338E-47 | 0.739380233 | 0.601 | 0.122 | 9.4506E-43  | KO | Mef2d    | 0.479 |
| Rab1b    | 3.11646E-47 | 0.819092071 | 0.58  | 0.114 | 9.67753E-43 | KO | Rab1b    | 0.466 |
| Taok3    | 3.62304E-47 | 0.92001148  | 0.45  | 0.068 | 1.12506E-42 | KO | Taok3    | 0.382 |
| Arpc4    | 3.66966E-47 | 1.059383293 | 0.765 | 0.205 | 1.13954E-42 | KO | Arpc4    | 0.56  |
| Pdcd1lg2 | 3.73662E-47 | 1.301241175 | 0.424 | 0.06  | 1.16033E-42 | KO | Pdcd1lg2 | 0.364 |
| Cops4    | 3.78021E-47 | 0.813071889 | 0.571 | 0.111 | 1.17387E-42 | KO | Cops4    | 0.46  |
| Ptpn7    | 3.88362E-47 | 1.041826637 | 0.597 | 0.124 | 1.20598E-42 | KO | Ptpn7    | 0.473 |
| Cd200r1  | 4.25154E-47 | 1.972608942 | 0.294 | 0.021 | 1.32023E-42 | KO | Cd200r1  | 0.273 |
| Man1a2   | 6.92257E-47 | 0.998806233 | 0.471 | 0.075 | 2.14967E-42 | KO | Man1a2   | 0.396 |
| Ier5     | 6.94083E-47 | 0.893785712 | 0.576 | 0.116 | 2.15533E-42 | KO | Ier5     | 0.46  |
| Syt11    | 7.38035E-47 | 1.542728971 | 0.433 | 0.064 | 2.29182E-42 | KO | Syt11    | 0.369 |
| Hnrnp1   | 7.77646E-47 | 0.807291581 | 0.668 | 0.154 | 2.41482E-42 | KO | Hnrnp1   | 0.514 |
| Med13l   | 8.61485E-47 | 1.621995642 | 0.387 | 0.049 | 2.67517E-42 | KO | Med13l   | 0.338 |
| Uggt1    | 9.14702E-47 | 0.989540994 | 0.45  | 0.068 | 2.84042E-42 | KO | Uggt1    | 0.382 |
| Ahr      | 9.17234E-47 | 1.676373201 | 0.282 | 0.018 | 2.84829E-42 | KO | Ahr      | 0.264 |
| Tsc22d4  | 1.08386E-46 | 0.740403724 | 0.723 | 0.175 | 3.36571E-42 | KO | Tsc22d4  | 0.548 |
| Plek     | 1.10776E-46 | 1.25101685  | 0.66  | 0.16  | 3.43993E-42 | KO | Plek     | 0.5   |
| Dnah8    | 1.13482E-46 | 2.434031123 | 0.265 | 0.014 | 3.52397E-42 | KO | Dnah8    | 0.251 |
| Slc3a2   | 1.19762E-46 | 1.093112667 | 0.849 | 0.266 | 3.71898E-42 | KO | Slc3a2   | 0.583 |
| Raf1     | 1.22421E-46 | 0.893699545 | 0.525 | 0.096 | 3.80154E-42 | KO | Raf1     | 0.429 |
| Casp4    | 1.29896E-46 | 1.668226681 | 0.366 | 0.042 | 4.03365E-42 | KO | Casp4    | 0.324 |
| Spag9    | 1.32722E-46 | 0.948982551 | 0.655 | 0.147 | 4.1214E-42  | KO | Spag9    | 0.508 |
| Wac      | 1.52723E-46 | 0.876391282 | 0.605 | 0.128 | 4.74251E-42 | KO | Wac      | 0.477 |
| Pip4k2a  | 1.7199E-46  | 0.92588364  | 0.45  | 0.069 | 5.34081E-42 | KO | Pip4k2a  | 0.381 |
| Ikzf3    | 1.73023E-46 | 1.119235856 | 0.618 | 0.139 | 5.3729E-42  | KO | Ikzf3    | 0.479 |
| Ell2     | 1.81818E-46 | 1.992501878 | 0.324 | 0.03  | 5.64599E-42 | KO | Ell2     | 0.294 |
| Map4     | 1.87691E-46 | 1.027951021 | 0.492 | 0.085 | 5.82837E-42 | KO | Map4     | 0.407 |
| Abi1     | 1.90829E-46 | 0.866735214 | 0.567 | 0.113 | 5.92582E-42 | KO | Abi1     | 0.454 |
| Btg2     | 1.92609E-46 | 1.11877429  | 0.697 | 0.169 | 5.98109E-42 | KO | Btg2     | 0.528 |
| Psm11    | 2.09663E-46 | 1.075051978 | 0.613 | 0.137 | 6.51067E-42 | KO | Psm11    | 0.476 |
| Ndel1    | 2.27274E-46 | 1.423818924 | 0.437 | 0.066 | 7.05755E-42 | KO | Ndel1    | 0.371 |
| Slc16a6  | 2.2794E-46  | 1.389386285 | 0.403 | 0.055 | 7.07823E-42 | KO | Slc16a6  | 0.348 |
| Tab2     | 2.46558E-46 | 0.871347326 | 0.685 | 0.16  | 7.65636E-42 | KO | Tab2     | 0.525 |
| Phf6     | 2.46893E-46 | 1.285799102 | 0.429 | 0.062 | 7.66676E-42 | KO | Phf6     | 0.367 |
| Trrap    | 2.48771E-46 | 0.86221981  | 0.429 | 0.062 | 7.72508E-42 | KO | Trrap    | 0.367 |
| Zfand3   | 2.58022E-46 | 1.081843685 | 0.399 | 0.052 | 8.01235E-42 | KO | Zfand3   | 0.347 |
| Cyfp2    | 2.60121E-46 | 0.931046692 | 0.697 | 0.17  | 8.07755E-42 | KO | Cyfp2    | 0.527 |
| Lcp2     | 2.84584E-46 | 1.021232788 | 0.643 | 0.146 | 8.83719E-42 | KO | Lcp2     | 0.497 |
| Tnfsf10  | 2.91446E-46 | 1.771726309 | 0.336 | 0.034 | 9.05028E-42 | KO | Tnfsf10  | 0.302 |

|             |             |             |       |       |             |    |             |       |
|-------------|-------------|-------------|-------|-------|-------------|----|-------------|-------|
| Traf4       | 3.36774E-46 | 1.30894488  | 0.445 | 0.07  | 1.04578E-41 | KO | Traf4       | 0.375 |
| AC163354.1  | 3.50837E-46 | 1.297660564 | 0.441 | 0.066 | 1.08945E-41 | KO | AC163354.1  | 0.375 |
| Zcchc6      | 3.53911E-46 | 0.800339193 | 0.605 | 0.129 | 1.099E-41   | KO | Zcchc6      | 0.476 |
| Chic2       | 3.63054E-46 | 0.809649831 | 0.647 | 0.143 | 1.12739E-41 | KO | Chic2       | 0.504 |
| Ogdh        | 3.67099E-46 | 1.017078579 | 0.567 | 0.114 | 1.13995E-41 | KO | Ogdh        | 0.453 |
| Ubtf        | 3.75902E-46 | 1.066140899 | 0.613 | 0.134 | 1.16729E-41 | KO | Ubtf        | 0.479 |
| Itsn2       | 4.07133E-46 | 0.991061254 | 0.555 | 0.112 | 1.26427E-41 | KO | Itsn2       | 0.443 |
| Ptpa        | 4.88276E-46 | 1.332469972 | 0.475 | 0.079 | 1.51624E-41 | KO | Ptpa        | 0.396 |
| Zc3h18      | 5.13728E-46 | 0.95627874  | 0.391 | 0.05  | 1.59528E-41 | KO | Zc3h18      | 0.341 |
| Psemb9      | 5.38571E-46 | 1.222778728 | 0.891 | 0.329 | 1.67242E-41 | KO | Psemb9      | 0.562 |
| H2-K1       | 5.93527E-46 | 0.933120317 | 0.996 | 0.916 | 1.84308E-41 | KO | H2-K1       | 0.08  |
| Arid1a      | 6.37821E-46 | 0.840706351 | 0.66  | 0.152 | 1.98063E-41 | KO | Arid1a      | 0.508 |
| Gimap3      | 6.44207E-46 | 0.96539181  | 0.731 | 0.187 | 2.00046E-41 | KO | Gimap3      | 0.544 |
| Madd        | 6.88458E-46 | 0.815331839 | 0.534 | 0.099 | 2.13787E-41 | KO | Madd        | 0.435 |
| Rpl36al     | 7.38535E-46 | 1.05671258  | 0.887 | 0.291 | 2.29337E-41 | KO | Rpl36al     | 0.596 |
| Tshz1       | 1.04691E-45 | 1.186352287 | 0.45  | 0.071 | 3.25098E-41 | KO | Tshz1       | 0.379 |
| Sigirr      | 1.11392E-45 | 0.92038795  | 0.349 | 0.038 | 3.45907E-41 | KO | Sigirr      | 0.311 |
| Eif3c       | 1.12286E-45 | 1.167427529 | 0.857 | 0.28  | 3.48681E-41 | KO | Eif3c       | 0.577 |
| Dbnl        | 1.24402E-45 | 0.85732565  | 0.63  | 0.14  | 3.86306E-41 | KO | Dbnl        | 0.49  |
| Brd2        | 1.67195E-45 | 0.767142445 | 0.702 | 0.174 | 5.1919E-41  | KO | Brd2        | 0.528 |
| Atxn2l      | 1.72338E-45 | 0.926884445 | 0.605 | 0.134 | 5.35163E-41 | KO | Atxn2l      | 0.471 |
| Rtn3        | 1.79563E-45 | 1.147096794 | 0.609 | 0.137 | 5.57596E-41 | KO | Rtn3        | 0.472 |
| Serpinb9    | 1.84938E-45 | 1.411346202 | 0.702 | 0.202 | 5.74289E-41 | KO | Serpinb9    | 0.5   |
| Pitpnc1     | 1.87515E-45 | 0.900069887 | 0.521 | 0.097 | 5.8229E-41  | KO | Pitpnc1     | 0.424 |
| Atad2       | 1.88088E-45 | 1.228245136 | 0.622 | 0.146 | 5.84071E-41 | KO | Atad2       | 0.476 |
| St8sia4     | 2.38076E-45 | 0.851818929 | 0.458 | 0.073 | 7.39298E-41 | KO | St8sia4     | 0.385 |
| Polr2m      | 2.63829E-45 | 0.801751806 | 0.576 | 0.117 | 8.19269E-41 | KO | Polr2m      | 0.459 |
| Gpr174      | 2.78745E-45 | 1.346324826 | 0.458 | 0.076 | 8.65588E-41 | KO | Gpr174      | 0.382 |
| Rab11fip4   | 3.1665E-45  | 2.511884874 | 0.298 | 0.025 | 9.83294E-41 | KO | Rab11fip4   | 0.273 |
| Rpl13a      | 3.28415E-45 | 1.02391446  | 0.899 | 0.309 | 1.01983E-40 | KO | Rpl13a      | 0.59  |
| D16Ertd472e | 4.15441E-45 | 1.118631373 | 0.761 | 0.215 | 1.29007E-40 | KO | D16Ertd472e | 0.546 |
| H2-M3       | 4.39221E-45 | 1.092119102 | 0.429 | 0.064 | 1.36391E-40 | KO | H2-M3       | 0.365 |
| Josd1       | 5.14346E-45 | 2.234508765 | 0.294 | 0.024 | 1.5972E-40  | KO | Josd1       | 0.27  |
| Calm1       | 5.16309E-45 | 1.14089737  | 0.958 | 0.582 | 1.60329E-40 | KO | Calm1       | 0.376 |
| Gimap7      | 5.71038E-45 | 1.117117207 | 0.542 | 0.11  | 1.77324E-40 | KO | Gimap7      | 0.432 |
| Fhl2        | 5.75408E-45 | 1.555019027 | 0.328 | 0.034 | 1.78681E-40 | KO | Fhl2        | 0.294 |
| Aco2        | 6.81721E-45 | 1.047849369 | 0.559 | 0.114 | 2.11695E-40 | KO | Aco2        | 0.445 |
| Carnmt1     | 7.0803E-45  | 1.044566365 | 0.538 | 0.106 | 2.19864E-40 | KO | Carnmt1     | 0.432 |
| Prex1       | 8.06867E-45 | 0.899790628 | 0.571 | 0.12  | 2.50556E-40 | KO | Prex1       | 0.451 |
| Smarcd2     | 8.77171E-45 | 0.892803018 | 0.492 | 0.087 | 2.72388E-40 | KO | Smarcd2     | 0.405 |
| Il2ra       | 9.71181E-45 | 2.038864802 | 0.45  | 0.079 | 3.01581E-40 | KO | Il2ra       | 0.371 |
| Ptpn6       | 1.02727E-44 | 1.14684577  | 0.546 | 0.112 | 3.18999E-40 | KO | Ptpn6       | 0.434 |
| Gm29243     | 1.11508E-44 | 1.584025793 | 0.298 | 0.025 | 3.46267E-40 | KO | Gm29243     | 0.273 |
| Zcchc14     | 1.12601E-44 | 3.701714946 | 0.21  | 0.005 | 3.49661E-40 | KO | Zcchc14     | 0.205 |
| Eif2s3x     | 1.16872E-44 | 0.988391575 | 0.706 | 0.181 | 3.62923E-40 | KO | Eif2s3x     | 0.525 |
| Zfp36       | 1.21541E-44 | 1.289729895 | 0.517 | 0.1   | 3.77423E-40 | KO | Zfp36       | 0.417 |
| Aplp2       | 1.27455E-44 | 0.80403176  | 0.492 | 0.088 | 3.95786E-40 | KO | Aplp2       | 0.404 |
| Ddx6        | 1.27735E-44 | 0.757478166 | 0.786 | 0.212 | 3.96656E-40 | KO | Ddx6        | 0.574 |
| Slamf1      | 1.59535E-44 | 1.808476485 | 0.353 | 0.041 | 4.95405E-40 | KO | Slamf1      | 0.312 |
| Susd6       | 1.64703E-44 | 1.158228657 | 0.336 | 0.036 | 5.11453E-40 | KO | Susd6       | 0.3   |
| Herc2       | 1.67964E-44 | 1.064760206 | 0.391 | 0.053 | 5.21579E-40 | KO | Herc2       | 0.338 |



|           |             |             |       |       |             |    |           |       |
|-----------|-------------|-------------|-------|-------|-------------|----|-----------|-------|
| Sf3b2     | 1.68024E-44 | 1.006855339 | 0.815 | 0.245 | 5.21766E-40 | KO | Sf3b2     | 0.57  |
| Lrrfip1   | 1.70079E-44 | 0.793274836 | 0.685 | 0.17  | 5.28145E-40 | KO | Lrrfip1   | 0.515 |
| Abcb1b    | 1.94005E-44 | 1.545182144 | 0.42  | 0.064 | 6.02443E-40 | KO | Abcb1b    | 0.356 |
| Gpr68     | 2.00716E-44 | 1.43772158  | 0.429 | 0.066 | 6.23283E-40 | KO | Gpr68     | 0.363 |
| Cebpg     | 2.0092E-44  | 0.975922243 | 0.382 | 0.05  | 6.23918E-40 | KO | Cebpg     | 0.332 |
| Cd274     | 2.0136E-44  | 1.60478803  | 0.315 | 0.03  | 6.25285E-40 | KO | Cd274     | 0.285 |
| Polr2l    | 2.2769E-44  | 1.08874015  | 0.454 | 0.075 | 7.07047E-40 | KO | Polr2l    | 0.379 |
| Mta1      | 2.63255E-44 | 0.971215991 | 0.496 | 0.089 | 8.17487E-40 | KO | Mta1      | 0.407 |
| Slc35a4   | 2.66684E-44 | 0.818125758 | 0.42  | 0.063 | 8.28133E-40 | KO | Slc35a4   | 0.357 |
| Sept11    | 2.76387E-44 | 0.917293693 | 0.748 | 0.206 | 8.58265E-40 | KO | Sept11    | 0.542 |
| Dock11    | 2.88329E-44 | 0.969308977 | 0.496 | 0.09  | 8.95348E-40 | KO | Dock11    | 0.406 |
| Gsk3b     | 3.04336E-44 | 0.781360351 | 0.639 | 0.144 | 9.45056E-40 | KO | Gsk3b     | 0.495 |
| Kpna4     | 3.68333E-44 | 0.878963045 | 0.63  | 0.145 | 1.14378E-39 | KO | Kpna4     | 0.485 |
| Sema4d    | 3.78763E-44 | 0.946752867 | 0.697 | 0.18  | 1.17617E-39 | KO | Sema4d    | 0.517 |
| Hnrnpul1  | 3.79146E-44 | 0.945063849 | 0.706 | 0.181 | 1.17736E-39 | KO | Hnrnpul1  | 0.525 |
| Virma     | 3.81272E-44 | 1.090887458 | 0.403 | 0.058 | 1.18396E-39 | KO | Virma     | 0.345 |
| Psm1      | 4.35574E-44 | 0.83829566  | 0.609 | 0.137 | 1.35259E-39 | KO | Psm1      | 0.472 |
| Cd244     | 4.37034E-44 | 1.923888377 | 0.273 | 0.019 | 1.35712E-39 | KO | Cd244     | 0.254 |
| Dusp14    | 4.46019E-44 | 2.360729832 | 0.34  | 0.039 | 1.38502E-39 | KO | Dusp14    | 0.301 |
| Eif4g3    | 4.92116E-44 | 0.834604736 | 0.58  | 0.123 | 1.52817E-39 | KO | Eif4g3    | 0.457 |
| Glt1      | 5.15986E-44 | 1.107846816 | 0.626 | 0.146 | 1.60229E-39 | KO | Glt1      | 0.48  |
| Cd3g      | 5.88427E-44 | 1.274669343 | 0.929 | 0.539 | 1.82724E-39 | KO | Cd3g      | 0.39  |
| Hscb      | 6.12329E-44 | 1.222825151 | 0.445 | 0.072 | 1.90146E-39 | KO | Hscb      | 0.373 |
| Baz1b     | 6.16563E-44 | 0.955511324 | 0.601 | 0.135 | 1.91461E-39 | KO | Baz1b     | 0.466 |
| Aak1      | 6.9918E-44  | 0.87901321  | 0.504 | 0.094 | 2.17116E-39 | KO | Aak1      | 0.41  |
| Arhgap30  | 7.62049E-44 | 0.883336457 | 0.803 | 0.223 | 2.36639E-39 | KO | Arhgap30  | 0.58  |
| Rab5a     | 8.94563E-44 | 0.93422998  | 0.454 | 0.075 | 2.77789E-39 | KO | Rab5a     | 0.379 |
| Erap1     | 9.2684E-44  | 0.801448292 | 0.471 | 0.082 | 2.87812E-39 | KO | Erap1     | 0.389 |
| Vps36     | 1.01639E-43 | 0.946294417 | 0.605 | 0.139 | 3.15619E-39 | KO | Vps36     | 0.466 |
| Mxd4      | 1.03491E-43 | 0.731116775 | 0.487 | 0.087 | 3.21371E-39 | KO | Mxd4      | 0.4   |
| Vasp      | 1.18236E-43 | 1.074227264 | 0.828 | 0.262 | 3.67159E-39 | KO | Vasp      | 0.566 |
| Nab1      | 1.32008E-43 | 0.833526179 | 0.601 | 0.134 | 4.09925E-39 | KO | Nab1      | 0.467 |
| Smarca4   | 1.44732E-43 | 0.747650981 | 0.609 | 0.138 | 4.49435E-39 | KO | Smarca4   | 0.471 |
| Exoc4     | 1.59469E-43 | 0.871299019 | 0.424 | 0.065 | 4.95198E-39 | KO | Exoc4     | 0.359 |
| Hist1h2ap | 1.6871E-43  | 3.269938379 | 0.626 | 0.19  | 5.23894E-39 | KO | Hist1h2ap | 0.436 |
| Lcp1      | 1.69751E-43 | 1.12739671  | 0.958 | 0.512 | 5.27129E-39 | KO | Lcp1      | 0.446 |
| Zdhhc18   | 2.02581E-43 | 0.939066318 | 0.786 | 0.226 | 6.29075E-39 | KO | Zdhhc18   | 0.56  |
| Cdk17     | 2.31193E-43 | 0.818157887 | 0.492 | 0.09  | 7.17924E-39 | KO | Cdk17     | 0.402 |
| Rassf5    | 2.33109E-43 | 0.745534699 | 0.559 | 0.117 | 7.23872E-39 | KO | Rassf5    | 0.442 |
| Mrps21    | 2.49909E-43 | 1.020269261 | 0.765 | 0.215 | 7.76044E-39 | KO | Mrps21    | 0.55  |
| Gsk3a     | 2.50304E-43 | 1.058869205 | 0.445 | 0.074 | 7.77269E-39 | KO | Gsk3a     | 0.371 |
| Gfpt1     | 3.25532E-43 | 0.8800135   | 0.466 | 0.082 | 1.01087E-38 | KO | Gfpt1     | 0.384 |
| Cers2     | 3.34036E-43 | 1.077525566 | 0.559 | 0.119 | 1.03728E-38 | KO | Cers2     | 0.44  |
| Tes       | 3.43267E-43 | 0.754210532 | 0.647 | 0.152 | 1.06595E-38 | KO | Tes       | 0.495 |
| Gatad2b   | 3.98119E-43 | 0.93921854  | 0.588 | 0.131 | 1.23628E-38 | KO | Gatad2b   | 0.457 |
| Cdipt     | 4.2477E-43  | 0.841438846 | 0.492 | 0.091 | 1.31904E-38 | KO | Cdipt     | 0.401 |
| Raph1     | 4.57774E-43 | 1.088501948 | 0.492 | 0.091 | 1.42153E-38 | KO | Raph1     | 0.401 |
| Smc1a     | 4.6354E-43  | 0.977488137 | 0.672 | 0.173 | 1.43943E-38 | KO | Smc1a     | 0.499 |
| Foxo1     | 4.6881E-43  | 0.910637425 | 0.445 | 0.075 | 1.45579E-38 | KO | Foxo1     | 0.37  |
| Rab27a    | 4.80547E-43 | 0.774675628 | 0.525 | 0.104 | 1.49224E-38 | KO | Rab27a    | 0.421 |
| Irak2     | 4.86432E-43 | 0.950092565 | 0.399 | 0.058 | 1.51052E-38 | KO | Irak2     | 0.341 |

|          |             |             |       |       |             |    |          |       |
|----------|-------------|-------------|-------|-------|-------------|----|----------|-------|
| Trim26   | 4.9711E-43  | 1.146360687 | 0.408 | 0.061 | 1.54367E-38 | KO | Trim26   | 0.347 |
| Smap1    | 5.37663E-43 | 1.240298046 | 0.542 | 0.114 | 1.6696E-38  | KO | Smap1    | 0.428 |
| Stat4    | 5.45655E-43 | 0.984356301 | 0.639 | 0.156 | 1.69442E-38 | KO | Stat4    | 0.483 |
| Chtf8    | 5.6773E-43  | 1.041443385 | 0.382 | 0.053 | 1.76297E-38 | KO | Chtf8    | 0.329 |
| Zgpat    | 5.79014E-43 | 1.351591195 | 0.324 | 0.035 | 1.79801E-38 | KO | Zgpat    | 0.289 |
| Cnot6l   | 6.64985E-43 | 0.948339369 | 0.685 | 0.179 | 2.06498E-38 | KO | Cnot6l   | 0.506 |
| Fli1     | 6.83135E-43 | 0.748981291 | 0.555 | 0.116 | 2.12134E-38 | KO | Fli1     | 0.439 |
| Ncoa2    | 8.69919E-43 | 0.991946705 | 0.5   | 0.096 | 2.70136E-38 | KO | Ncoa2    | 0.404 |
| Snrnp200 | 8.88728E-43 | 0.874591799 | 0.508 | 0.096 | 2.75977E-38 | KO | Snrnp200 | 0.412 |
| Eprs     | 8.94662E-43 | 1.049363643 | 0.626 | 0.151 | 2.77819E-38 | KO | Eprs     | 0.475 |
| Oxct1    | 1.04997E-42 | 0.885204582 | 0.563 | 0.121 | 3.26046E-38 | KO | Oxct1    | 0.442 |
| Socs1    | 1.10196E-42 | 1.08846125  | 0.391 | 0.056 | 3.42193E-38 | KO | Socs1    | 0.335 |
| Cdip1    | 1.13806E-42 | 1.253246191 | 0.336 | 0.038 | 3.53401E-38 | KO | Cdip1    | 0.298 |
| Ube3a    | 1.21779E-42 | 0.742197908 | 0.651 | 0.157 | 3.78159E-38 | KO | Ube3a    | 0.494 |
| Ahcyl1   | 1.22167E-42 | 0.888484042 | 0.479 | 0.088 | 3.79364E-38 | KO | Ahcyl1   | 0.391 |
| Hikeshi  | 1.23584E-42 | 1.098023913 | 0.45  | 0.078 | 3.83764E-38 | KO | Hikeshi  | 0.372 |
| Ganab    | 1.25489E-42 | 0.864642818 | 0.454 | 0.079 | 3.89681E-38 | KO | Ganab    | 0.375 |
| Rab8a    | 1.27706E-42 | 0.723249716 | 0.668 | 0.162 | 3.96567E-38 | KO | Rab8a    | 0.506 |
| Capn1    | 1.27883E-42 | 0.827291263 | 0.525 | 0.103 | 3.97115E-38 | KO | Capn1    | 0.422 |
| Ragef1   | 1.40253E-42 | 0.71561135  | 0.5   | 0.096 | 4.35529E-38 | KO | Ragef1   | 0.404 |
| Cr1l     | 1.48438E-42 | 0.721070803 | 0.571 | 0.123 | 4.60944E-38 | KO | Cr1l     | 0.448 |
| Rangap1  | 1.68942E-42 | 1.044783393 | 0.55  | 0.118 | 5.24617E-38 | KO | Rangap1  | 0.432 |
| Wbp2     | 1.80334E-42 | 0.880952465 | 0.479 | 0.087 | 5.59992E-38 | KO | Wbp2     | 0.392 |
| Flii     | 1.89983E-42 | 0.815272837 | 0.542 | 0.111 | 5.89955E-38 | KO | Flii     | 0.431 |
| Irs2     | 2.00706E-42 | 2.430871612 | 0.265 | 0.019 | 6.23252E-38 | KO | Irs2     | 0.246 |
| Rasgef1a | 2.15295E-42 | 4.362112979 | 0.185 | 0.002 | 6.68556E-38 | KO | Rasgef1a | 0.183 |
| Hspd1    | 2.20116E-42 | 1.059019689 | 0.773 | 0.229 | 6.83527E-38 | KO | Hspd1    | 0.544 |
| Ppp2r5c  | 2.47127E-42 | 0.720315002 | 0.664 | 0.164 | 7.67402E-38 | KO | Ppp2r5c  | 0.5   |
| Gm16286  | 2.54534E-42 | 0.837359419 | 0.651 | 0.159 | 7.90404E-38 | KO | Gm16286  | 0.492 |
| Rps6ka1  | 2.57512E-42 | 0.88846992  | 0.508 | 0.099 | 7.99652E-38 | KO | Rps6ka1  | 0.409 |
| Ep300    | 2.62266E-42 | 0.774112496 | 0.517 | 0.103 | 8.14414E-38 | KO | Ep300    | 0.414 |
| Traf1    | 2.72082E-42 | 1.444683785 | 0.794 | 0.282 | 8.44895E-38 | KO | Traf1    | 0.512 |
| Chd1     | 3.05318E-42 | 0.849927511 | 0.445 | 0.075 | 9.48104E-38 | KO | Chd1     | 0.37  |
| Cmpk1    | 3.73363E-42 | 0.886283397 | 0.605 | 0.143 | 1.1594E-37  | KO | Cmpk1    | 0.462 |
| Akt2     | 3.80364E-42 | 1.021192881 | 0.441 | 0.075 | 1.18115E-37 | KO | Akt2     | 0.366 |
| Elmo2    | 4.28349E-42 | 0.958606781 | 0.328 | 0.037 | 1.33015E-37 | KO | Elmo2    | 0.291 |
| Cd200    | 4.59062E-42 | 1.537871337 | 0.454 | 0.083 | 1.42553E-37 | KO | Cd200    | 0.371 |
| Trp53    | 4.617E-42   | 0.94090097  | 0.609 | 0.144 | 1.43372E-37 | KO | Trp53    | 0.465 |
| Slc1a5   | 4.89749E-42 | 0.904044563 | 0.601 | 0.138 | 1.52082E-37 | KO | Slc1a5   | 0.463 |
| Tmx3     | 5.22818E-42 | 1.044187798 | 0.437 | 0.074 | 1.62351E-37 | KO | Tmx3     | 0.363 |
| Ahnak    | 5.72076E-42 | 1.026890909 | 0.878 | 0.299 | 1.77647E-37 | KO | Ahnak    | 0.579 |
| Man2b2   | 5.73813E-42 | 2.618801101 | 0.231 | 0.012 | 1.78186E-37 | KO | Man2b2   | 0.219 |
| Cebpz    | 5.7636E-42  | 1.130578535 | 0.504 | 0.1   | 1.78977E-37 | KO | Cebpz    | 0.404 |
| Bet1     | 6.06009E-42 | 1.332784294 | 0.382 | 0.055 | 1.88184E-37 | KO | Bet1     | 0.327 |
| Cd86     | 6.60504E-42 | 2.228507939 | 0.239 | 0.013 | 2.05106E-37 | KO | Cd86     | 0.226 |
| Pdia4    | 6.73318E-42 | 1.068018582 | 0.441 | 0.076 | 2.09085E-37 | KO | Pdia4    | 0.365 |
| Hsph1    | 7.07656E-42 | 1.552662185 | 0.391 | 0.06  | 2.19748E-37 | KO | Hsph1    | 0.331 |
| Rnps1    | 7.50596E-42 | 0.920414599 | 0.55  | 0.119 | 2.33082E-37 | KO | Rnps1    | 0.431 |
| Atic     | 8.20164E-42 | 0.954805456 | 0.391 | 0.058 | 2.54686E-37 | KO | Atic     | 0.333 |
| Pafah1b1 | 8.73004E-42 | 0.816709994 | 0.786 | 0.23  | 2.71094E-37 | KO | Pafah1b1 | 0.556 |
| Cx3cr1   | 8.9494E-42  | 2.045435844 | 0.319 | 0.036 | 2.77906E-37 | KO | Cx3cr1   | 0.283 |

|             |             |             |       |       |             |    |             |       |
|-------------|-------------|-------------|-------|-------|-------------|----|-------------|-------|
| Emd         | 9.01806E-42 | 0.880965597 | 0.664 | 0.169 | 2.80038E-37 | KO | Emd         | 0.495 |
| Ubr4        | 9.15754E-42 | 0.975127393 | 0.433 | 0.072 | 2.84369E-37 | KO | Ubr4        | 0.361 |
| Synrg       | 9.18072E-42 | 1.314830232 | 0.311 | 0.033 | 2.85089E-37 | KO | Synrg       | 0.278 |
| Mis18a      | 9.27905E-42 | 1.478476061 | 0.315 | 0.034 | 2.88142E-37 | KO | Mis18a      | 0.281 |
| Pik3r1      | 9.40282E-42 | 0.720310129 | 0.634 | 0.153 | 2.91986E-37 | KO | Pik3r1      | 0.481 |
| Gnpda1      | 9.69233E-42 | 1.289267729 | 0.315 | 0.034 | 3.00976E-37 | KO | Gnpda1      | 0.281 |
| Eif4ebp2    | 1.00808E-41 | 0.70377388  | 0.542 | 0.112 | 3.13038E-37 | KO | Eif4ebp2    | 0.43  |
| H2-D1       | 1.00841E-41 | 0.872596006 | 0.983 | 0.838 | 3.13142E-37 | KO | H2-D1       | 0.145 |
| Dot1l       | 1.08967E-41 | 1.218249011 | 0.378 | 0.054 | 3.38374E-37 | KO | Dot1l       | 0.324 |
| Ptch1       | 1.11895E-41 | 1.716498007 | 0.378 | 0.056 | 3.47469E-37 | KO | Ptch1       | 0.322 |
| Snx18       | 1.17948E-41 | 0.948715918 | 0.529 | 0.111 | 3.66263E-37 | KO | Snx18       | 0.418 |
| Smap2       | 1.36217E-41 | 0.700456606 | 0.559 | 0.119 | 4.22995E-37 | KO | Smap2       | 0.44  |
| Bcl2a1d     | 1.84381E-41 | 1.304776768 | 0.739 | 0.233 | 5.72559E-37 | KO | Bcl2a1d     | 0.506 |
| Tgoln1      | 1.88677E-41 | 0.831104316 | 0.643 | 0.155 | 5.859E-37   | KO | Tgoln1      | 0.488 |
| Havcr2      | 1.89073E-41 | 1.129053954 | 0.592 | 0.139 | 5.87128E-37 | KO | Havcr2      | 0.453 |
| Rab8b       | 1.89415E-41 | 0.904503327 | 0.79  | 0.232 | 5.8819E-37  | KO | Rab8b       | 0.558 |
| Cnppd1      | 2.18784E-41 | 0.875266761 | 0.454 | 0.081 | 6.7939E-37  | KO | Cnppd1      | 0.373 |
| Rbm14       | 2.29523E-41 | 1.50203326  | 0.361 | 0.049 | 7.12738E-37 | KO | Rbm14       | 0.312 |
| Tapbp       | 2.38513E-41 | 1.009931647 | 0.819 | 0.259 | 7.40655E-37 | KO | Tapbp       | 0.56  |
| Hcst        | 2.71132E-41 | 1.052889406 | 0.929 | 0.355 | 8.41947E-37 | KO | Hcst        | 0.574 |
| Erh         | 2.74471E-41 | 1.181351849 | 0.731 | 0.212 | 8.52314E-37 | KO | Erh         | 0.519 |
| Rab10       | 2.79073E-41 | 0.947089925 | 0.689 | 0.184 | 8.66604E-37 | KO | Rab10       | 0.505 |
| Itpr2       | 2.90095E-41 | 1.006053731 | 0.324 | 0.037 | 9.00832E-37 | KO | Itpr2       | 0.287 |
| Eif4e3      | 2.96487E-41 | 1.44388182  | 0.303 | 0.031 | 9.20682E-37 | KO | Eif4e3      | 0.272 |
| Notch1      | 2.98334E-41 | 0.921323572 | 0.445 | 0.078 | 9.26417E-37 | KO | Notch1      | 0.367 |
| Pabpn1      | 3.01305E-41 | 0.837837489 | 0.42  | 0.068 | 9.35644E-37 | KO | Pabpn1      | 0.352 |
| Actb        | 3.10433E-41 | 0.849805107 | 0.996 | 0.971 | 9.63988E-37 | KO | Actb        | 0.025 |
| Rad21       | 3.21106E-41 | 1.130706532 | 0.672 | 0.185 | 9.97129E-37 | KO | Rad21       | 0.487 |
| Slc30a9     | 3.35341E-41 | 0.783849719 | 0.508 | 0.101 | 1.04133E-36 | KO | Slc30a9     | 0.407 |
| Tstd3       | 3.42103E-41 | 1.77023734  | 0.307 | 0.033 | 1.06233E-36 | KO | Tstd3       | 0.274 |
| Khsrp       | 3.58288E-41 | 0.723493601 | 0.571 | 0.127 | 1.11259E-36 | KO | Khsrp       | 0.444 |
| Runx1       | 4.19336E-41 | 1.355667532 | 0.403 | 0.064 | 1.30217E-36 | KO | Runx1       | 0.339 |
| Kctd10      | 4.43466E-41 | 1.210182962 | 0.391 | 0.059 | 1.3771E-36  | KO | Kctd10      | 0.332 |
| Plac8       | 4.45942E-41 | 1.963103193 | 0.66  | 0.238 | 1.38478E-36 | KO | Plac8       | 0.422 |
| Elf1        | 5.62851E-41 | 0.70691299  | 0.769 | 0.218 | 1.74782E-36 | KO | Elf1        | 0.551 |
| Sh2d1a      | 5.82462E-41 | 0.918034639 | 0.613 | 0.147 | 1.80872E-36 | KO | Sh2d1a      | 0.466 |
| Wdr95       | 6.00106E-41 | 1.649547642 | 0.345 | 0.044 | 1.86351E-36 | KO | Wdr95       | 0.301 |
| D030056L22R | 6.14468E-41 | 1.667287968 | 0.315 | 0.036 | 1.90811E-36 | KO | D030056L22R | 0.279 |
| Purb        | 6.20545E-41 | 0.971356958 | 0.824 | 0.261 | 1.92698E-36 | KO | Purb        | 0.563 |
| Mfap1a      | 6.38219E-41 | 1.694291103 | 0.328 | 0.039 | 1.98186E-36 | KO | Mfap1a      | 0.289 |
| Atp10a      | 8.80154E-41 | 0.915420345 | 0.408 | 0.065 | 2.73314E-36 | KO | Atp10a      | 0.343 |
| Ptpn2       | 9.66085E-41 | 1.355629806 | 0.437 | 0.078 | 2.99998E-36 | KO | Ptpn2       | 0.359 |
| Nfatc1      | 1.05864E-40 | 1.001749801 | 0.504 | 0.103 | 3.2874E-36  | KO | Nfatc1      | 0.401 |
| Srgap3      | 1.06612E-40 | 1.740695054 | 0.269 | 0.022 | 3.31062E-36 | KO | Srgap3      | 0.247 |
| Dusp2       | 1.07088E-40 | 1.147157311 | 0.668 | 0.178 | 3.32541E-36 | KO | Dusp2       | 0.49  |
| Fam110a     | 1.2494E-40  | 1.090847713 | 0.433 | 0.076 | 3.87978E-36 | KO | Fam110a     | 0.357 |
| Chtop       | 1.28794E-40 | 0.783669691 | 0.584 | 0.137 | 3.99944E-36 | KO | Chtop       | 0.447 |
| Dpm1        | 1.3206E-40  | 1.13312898  | 0.357 | 0.048 | 4.10084E-36 | KO | Dpm1        | 0.309 |
| Ggta1       | 1.32513E-40 | 1.695225772 | 0.315 | 0.036 | 4.11493E-36 | KO | Ggta1       | 0.279 |
| Setd1b      | 1.58252E-40 | 1.500520568 | 0.328 | 0.039 | 4.9142E-36  | KO | Setd1b      | 0.289 |
| Gls         | 1.62063E-40 | 0.829410749 | 0.803 | 0.243 | 5.03253E-36 | KO | Gls         | 0.56  |

|           |             |             |       |       |             |    |           |        |
|-----------|-------------|-------------|-------|-------|-------------|----|-----------|--------|
| Gmfb      | 1.6231E-40  | 0.932442144 | 0.513 | 0.107 | 5.0402E-36  | KO | Gmfb      | 0.406  |
| Epsti1    | 1.62639E-40 | 0.861638992 | 0.651 | 0.164 | 5.05043E-36 | KO | Epsti1    | 0.487  |
| Cdc14a    | 1.62781E-40 | 1.086080123 | 0.349 | 0.046 | 5.05483E-36 | KO | Cdc14a    | 0.303  |
| Gpcpd1    | 1.94936E-40 | 1.103417921 | 0.412 | 0.067 | 6.05333E-36 | KO | Gpcpd1    | 0.345  |
| Ywhaz     | 1.95664E-40 | 1.017738792 | 0.903 | 0.339 | 6.07594E-36 | KO | Ywhaz     | 0.564  |
| Chordc1   | 1.98198E-40 | 0.859005566 | 0.378 | 0.056 | 6.15463E-36 | KO | Chordc1   | 0.322  |
| Kpnb1     | 2.12907E-40 | 0.840648267 | 0.592 | 0.14  | 6.61141E-36 | KO | Kpnb1     | 0.452  |
| Vmp1      | 2.35831E-40 | 1.158698582 | 0.803 | 0.255 | 7.32324E-36 | KO | Vmp1      | 0.548  |
| Sept9     | 2.44458E-40 | 0.787821785 | 0.79  | 0.236 | 7.59116E-36 | KO | Sept9     | 0.554  |
| Agpat4    | 2.48671E-40 | 0.938259454 | 0.416 | 0.069 | 7.72197E-36 | KO | Agpat4    | 0.347  |
| Emc7      | 2.6887E-40  | 0.786206622 | 0.597 | 0.143 | 8.34923E-36 | KO | Emc7      | 0.454  |
| Nek7      | 2.95548E-40 | 0.925272833 | 0.408 | 0.066 | 9.17765E-36 | KO | Nek7      | 0.342  |
| Anxa6     | 3.04039E-40 | 0.930991596 | 0.878 | 0.305 | 9.44132E-36 | KO | Anxa6     | 0.573  |
| Fnbp1     | 3.1333E-40  | 0.917306902 | 0.723 | 0.2   | 9.72984E-36 | KO | Fnbp1     | 0.523  |
| Crebbp    | 3.30426E-40 | 0.721720992 | 0.508 | 0.104 | 1.02607E-35 | KO | Crebbp    | 0.404  |
| Hypk      | 3.44488E-40 | 0.998898292 | 0.462 | 0.086 | 1.06974E-35 | KO | Hypk      | 0.376  |
| Ms4a4b    | 3.55355E-40 | 1.273664181 | 0.866 | 0.407 | 1.10349E-35 | KO | Ms4a4b    | 0.459  |
| Smco4     | 3.69139E-40 | 1.350862657 | 0.387 | 0.061 | 1.14629E-35 | KO | Smco4     | 0.326  |
| Ablim1    | 3.83093E-40 | 0.697801301 | 0.752 | 0.213 | 1.18962E-35 | KO | Ablim1    | 0.539  |
| Ntan1     | 3.92991E-40 | 0.75186584  | 0.597 | 0.14  | 1.22036E-35 | KO | Ntan1     | 0.457  |
| Galnt3    | 4.13039E-40 | 1.596123498 | 0.29  | 0.029 | 1.28261E-35 | KO | Galnt3    | 0.261  |
| Fosb      | 4.99679E-40 | 2.132916938 | 0.298 | 0.032 | 1.55165E-35 | KO | Fosb      | 0.266  |
| Ss18      | 5.07176E-40 | 0.747246278 | 0.492 | 0.097 | 1.57493E-35 | KO | Ss18      | 0.395  |
| Pspc1     | 5.95135E-40 | 0.918246106 | 0.412 | 0.068 | 1.84807E-35 | KO | Pspc1     | 0.344  |
| Ilk       | 6.29208E-40 | 0.727488497 | 0.508 | 0.104 | 1.95388E-35 | KO | Ilk       | 0.404  |
| Rhoq      | 6.76546E-40 | 1.633735165 | 0.303 | 0.033 | 2.10088E-35 | KO | Rhoq      | 0.27   |
| Atp6v0a2  | 7.35254E-40 | 0.719844516 | 0.391 | 0.061 | 2.28318E-35 | KO | Atp6v0a2  | 0.33   |
| Lsm12     | 8.60701E-40 | 0.814558707 | 0.685 | 0.181 | 2.67273E-35 | KO | Lsm12     | 0.504  |
| Tram1     | 8.74984E-40 | 0.717360743 | 0.727 | 0.202 | 2.71709E-35 | KO | Tram1     | 0.525  |
| Cd3e      | 9.89297E-40 | 0.980006964 | 0.882 | 0.333 | 3.07206E-35 | KO | Cd3e      | 0.549  |
| Slc2a3    | 9.97813E-40 | 1.436857383 | 0.429 | 0.078 | 3.09851E-35 | KO | Slc2a3    | 0.351  |
| Stag2     | 1.05696E-39 | 0.808675705 | 0.529 | 0.114 | 3.28218E-35 | KO | Stag2     | 0.415  |
| Cpsf2     | 1.06331E-39 | 1.350455664 | 0.429 | 0.077 | 3.30189E-35 | KO | Cpsf2     | 0.352  |
| Hcls1     | 1.07297E-39 | 0.843529686 | 0.731 | 0.207 | 3.3319E-35  | KO | Hcls1     | 0.524  |
| Cd5       | 1.10093E-39 | 1.185930065 | 0.458 | 0.088 | 3.4187E-35  | KO | Cd5       | 0.37   |
| C1galt1   | 1.20104E-39 | 0.700280845 | 0.408 | 0.067 | 3.72958E-35 | KO | C1galt1   | 0.341  |
| Hnrnpa2b1 | 1.32958E-39 | 1.057211692 | 0.954 | 0.492 | 4.12874E-35 | KO | Hnrnpa2b1 | 0.462  |
| Uba52     | 1.52702E-39 | 1.04157996  | 0.916 | 0.458 | 4.74184E-35 | KO | Uba52     | 0.458  |
| Actn4     | 1.58416E-39 | 0.928308039 | 0.676 | 0.187 | 4.9193E-35  | KO | Actn4     | 0.489  |
| Cmtm6     | 1.66861E-39 | 0.86073038  | 0.412 | 0.068 | 5.18155E-35 | KO | Cmtm6     | 0.344  |
| Dnajc9    | 1.67973E-39 | 1.162366442 | 0.592 | 0.148 | 5.21607E-35 | KO | Dnajc9    | 0.444  |
| Mycbp2    | 1.86356E-39 | 0.69346813  | 0.693 | 0.186 | 5.78691E-35 | KO | Mycbp2    | 0.507  |
| Bscl2     | 1.88451E-39 | 0.827514207 | 0.429 | 0.075 | 5.85197E-35 | KO | Bscl2     | 0.354  |
| Pygb      | 2.15604E-39 | 1.147853471 | 0.345 | 0.046 | 6.69514E-35 | KO | Pygb      | 0.299  |
| Eif4enif1 | 2.24938E-39 | 0.750922843 | 0.475 | 0.093 | 6.985E-35   | KO | Eif4enif1 | 0.382  |
| Prkcsh    | 2.27346E-39 | 0.722036192 | 0.626 | 0.154 | 7.05977E-35 | KO | Prkcsh    | 0.472  |
| Klrd1     | 2.3045E-39  | 1.322918395 | 0.761 | 0.287 | 7.15617E-35 | KO | Klrd1     | 0.474  |
| Gm42418   | 2.35777E-39 | 0.793844664 | 0.996 | 0.999 | 7.32159E-35 | KO | Gm42418   | -0.003 |
| Ppp1r15b  | 2.42783E-39 | 0.832410591 | 0.424 | 0.074 | 7.53915E-35 | KO | Ppp1r15b  | 0.35   |
| Pdcl3     | 2.73479E-39 | 0.846325902 | 0.496 | 0.103 | 8.49234E-35 | KO | Pdcl3     | 0.393  |
| Lmnb1     | 2.93543E-39 | 1.181423175 | 0.66  | 0.186 | 9.11539E-35 | KO | Lmnb1     | 0.474  |

|         |             |             |       |       |             |    |         |       |
|---------|-------------|-------------|-------|-------|-------------|----|---------|-------|
| Nup210  | 2.97958E-39 | 0.892855428 | 0.693 | 0.193 | 9.25249E-35 | KO | Nup210  | 0.5   |
| Mtf2    | 2.99317E-39 | 1.009662547 | 0.466 | 0.09  | 9.29469E-35 | KO | Mtf2    | 0.376 |
| Copb1   | 3.11538E-39 | 0.818756879 | 0.529 | 0.115 | 9.67418E-35 | KO | Copb1   | 0.414 |
| Trmt1l  | 3.27909E-39 | 0.940025376 | 0.349 | 0.048 | 1.01825E-34 | KO | Trmt1l  | 0.301 |
| Pank2   | 3.32285E-39 | 0.834392314 | 0.458 | 0.087 | 1.03185E-34 | KO | Pank2   | 0.371 |
| Fcrl6   | 3.48213E-39 | 2.439857006 | 0.214 | 0.011 | 1.0813E-34  | KO | Fcrl6   | 0.203 |
| Bdp1    | 3.5462E-39  | 0.979882609 | 0.399 | 0.064 | 1.1012E-34  | KO | Bdp1    | 0.335 |
| Cntrl   | 3.74567E-39 | 0.700743148 | 0.685 | 0.183 | 1.16314E-34 | KO | Cntrl   | 0.502 |
| Chfr    | 3.75857E-39 | 0.942404079 | 0.45  | 0.084 | 1.16715E-34 | KO | Chfr    | 0.366 |
| Ilf3    | 3.98935E-39 | 0.743351075 | 0.42  | 0.073 | 1.23881E-34 | KO | Ilf3    | 0.347 |
| Ubn1    | 3.99893E-39 | 0.77877923  | 0.504 | 0.105 | 1.24179E-34 | KO | Ubn1    | 0.399 |
| Hexim1  | 4.02023E-39 | 0.829477426 | 0.437 | 0.079 | 1.2484E-34  | KO | Hexim1  | 0.358 |
| Tcea1   | 4.03924E-39 | 0.735795714 | 0.58  | 0.137 | 1.2543E-34  | KO | Tcea1   | 0.443 |
| Ccrl2   | 4.26759E-39 | 1.171128455 | 0.424 | 0.075 | 1.32522E-34 | KO | Ccrl2   | 0.349 |
| Kat6a   | 4.51686E-39 | 0.70850117  | 0.395 | 0.063 | 1.40262E-34 | KO | Kat6a   | 0.332 |
| Helz2   | 4.74116E-39 | 1.433712126 | 0.311 | 0.037 | 1.47227E-34 | KO | Helz2   | 0.274 |
| Nfyb    | 4.77603E-39 | 0.780473919 | 0.458 | 0.088 | 1.4831E-34  | KO | Nfyb    | 0.37  |
| Socs3   | 5.01758E-39 | 1.062227644 | 0.37  | 0.056 | 1.55811E-34 | KO | Socs3   | 0.314 |
| Dpp9    | 5.17585E-39 | 0.962935681 | 0.332 | 0.042 | 1.60726E-34 | KO | Dpp9    | 0.29  |
| Rfc1    | 5.28657E-39 | 1.483618295 | 0.378 | 0.061 | 1.64164E-34 | KO | Rfc1    | 0.317 |
| Stx11   | 5.35023E-39 | 1.327670342 | 0.487 | 0.104 | 1.66141E-34 | KO | Stx11   | 0.383 |
| Ppm1j   | 5.44802E-39 | 1.127787209 | 0.269 | 0.024 | 1.69177E-34 | KO | Ppm1j   | 0.245 |
| Dusp16  | 5.65272E-39 | 1.479630051 | 0.298 | 0.033 | 1.75534E-34 | KO | Dusp16  | 0.265 |
| Ttc7    | 6.32791E-39 | 0.834980404 | 0.42  | 0.073 | 1.96501E-34 | KO | Ttc7    | 0.347 |
| Cmc1    | 6.55351E-39 | 0.720058886 | 0.626 | 0.158 | 2.03506E-34 | KO | Cmc1    | 0.468 |
| Tmbim6  | 7.68745E-39 | 0.90679322  | 0.878 | 0.317 | 2.38718E-34 | KO | Tmbim6  | 0.561 |
| Senp2   | 8.06454E-39 | 0.780243863 | 0.462 | 0.088 | 2.50428E-34 | KO | Senp2   | 0.374 |
| Gbp7    | 8.59525E-39 | 0.96312342  | 0.492 | 0.104 | 2.66908E-34 | KO | Gbp7    | 0.388 |
| Nrf1    | 8.6051E-39  | 0.986261314 | 0.424 | 0.076 | 2.67214E-34 | KO | Nrf1    | 0.348 |
| Fam46a  | 1.02974E-38 | 1.614719303 | 0.571 | 0.152 | 3.19765E-34 | KO | Fam46a  | 0.419 |
| Osgep   | 1.14082E-38 | 0.839023141 | 0.466 | 0.091 | 3.54259E-34 | KO | Osgep   | 0.375 |
| Themis  | 1.14152E-38 | 0.71534321  | 0.626 | 0.157 | 3.54475E-34 | KO | Themis  | 0.469 |
| Panx1   | 1.26726E-38 | 1.508368689 | 0.298 | 0.034 | 3.93521E-34 | KO | Panx1   | 0.264 |
| Plp2    | 1.40073E-38 | 0.852386163 | 0.487 | 0.101 | 4.34967E-34 | KO | Plp2    | 0.386 |
| Rbm27   | 1.43251E-38 | 0.989265641 | 0.42  | 0.074 | 4.44836E-34 | KO | Rbm27   | 0.346 |
| Mthfd1l | 1.46288E-38 | 0.965095361 | 0.458 | 0.088 | 4.54269E-34 | KO | Mthfd1l | 0.37  |
| Rnf114  | 1.51369E-38 | 0.812028995 | 0.487 | 0.1   | 4.70045E-34 | KO | Rnf114  | 0.387 |
| C2cd3   | 1.58658E-38 | 1.017752752 | 0.328 | 0.042 | 4.92681E-34 | KO | C2cd3   | 0.286 |
| Amfr    | 1.67481E-38 | 0.735942329 | 0.525 | 0.114 | 5.20079E-34 | KO | Amfr    | 0.411 |
| Rap2a   | 1.78603E-38 | 1.153257724 | 0.42  | 0.077 | 5.54617E-34 | KO | Rap2a   | 0.343 |
| Dok2    | 1.79227E-38 | 0.948418488 | 0.504 | 0.108 | 5.56555E-34 | KO | Dok2    | 0.396 |
| Fam76a  | 1.84413E-38 | 0.901773374 | 0.353 | 0.05  | 5.72657E-34 | KO | Fam76a  | 0.303 |
| Irf9    | 1.91936E-38 | 1.466902544 | 0.319 | 0.04  | 5.96019E-34 | KO | Irf9    | 0.279 |
| Dnajc13 | 1.93474E-38 | 1.09199476  | 0.403 | 0.068 | 6.00794E-34 | KO | Dnajc13 | 0.335 |
| Jak2    | 1.94029E-38 | 1.110002372 | 0.5   | 0.109 | 6.02517E-34 | KO | Jak2    | 0.391 |
| Ddost   | 1.99268E-38 | 0.754771924 | 0.706 | 0.196 | 6.18786E-34 | KO | Ddost   | 0.51  |
| Tgfb1   | 1.99451E-38 | 1.08912423  | 0.786 | 0.255 | 6.19357E-34 | KO | Tgfb1   | 0.531 |
| Rpia    | 2.10086E-38 | 0.96901624  | 0.34  | 0.047 | 6.52379E-34 | KO | Rpia    | 0.293 |
| Tnks2   | 2.3614E-38  | 0.71315422  | 0.555 | 0.126 | 7.33286E-34 | KO | Tnks2   | 0.429 |
| Dck     | 2.46611E-38 | 1.89823849  | 0.294 | 0.034 | 7.658E-34   | KO | Dck     | 0.26  |
| Ubl3    | 2.47418E-38 | 0.727904294 | 0.748 | 0.221 | 7.68308E-34 | KO | Ubl3    | 0.527 |

|             |             |             |       |       |             |    |             |       |
|-------------|-------------|-------------|-------|-------|-------------|----|-------------|-------|
| Hif1a       | 2.52385E-38 | 0.966185671 | 0.916 | 0.362 | 7.83731E-34 | KO | Hif1a       | 0.554 |
| Parp8       | 2.52928E-38 | 1.262311634 | 0.324 | 0.041 | 7.85417E-34 | KO | Parp8       | 0.283 |
| Pcgf5       | 2.68361E-38 | 0.945680475 | 0.504 | 0.11  | 8.33342E-34 | KO | Pcgf5       | 0.394 |
| Pcmt1       | 2.84017E-38 | 1.066272206 | 0.45  | 0.087 | 8.81957E-34 | KO | Pcmt1       | 0.363 |
| Sp3         | 2.94767E-38 | 0.783498615 | 0.592 | 0.145 | 9.1534E-34  | KO | Sp3         | 0.447 |
| Zmiz1       | 3.05712E-38 | 0.705366494 | 0.513 | 0.11  | 9.49327E-34 | KO | Zmiz1       | 0.403 |
| Ube2d2a     | 3.4908E-38  | 0.704022356 | 0.735 | 0.207 | 1.084E-33   | KO | Ube2d2a     | 0.528 |
| 2810403A07R | 3.66232E-38 | 0.727335396 | 0.441 | 0.082 | 1.13726E-33 | KO | 2810403A07R | 0.359 |
| Mien1       | 3.92594E-38 | 0.784378725 | 0.672 | 0.184 | 1.21912E-33 | KO | Mien1       | 0.488 |
| Actr2       | 4.28485E-38 | 0.958815728 | 0.882 | 0.326 | 1.33058E-33 | KO | Actr2       | 0.556 |
| Vamp2       | 4.35104E-38 | 0.718843931 | 0.483 | 0.098 | 1.35113E-33 | KO | Vamp2       | 0.385 |
| Tcof1       | 4.43025E-38 | 1.018559392 | 0.471 | 0.097 | 1.37573E-33 | KO | Tcof1       | 0.374 |
| Pcna        | 4.43644E-38 | 1.31411106  | 0.609 | 0.172 | 1.37765E-33 | KO | Pcna        | 0.437 |
| Fbxw11      | 4.57639E-38 | 0.832202374 | 0.37  | 0.057 | 1.42111E-33 | KO | Fbxw11      | 0.313 |
| Mapk1       | 4.98481E-38 | 0.812824682 | 0.647 | 0.17  | 1.54793E-33 | KO | Mapk1       | 0.477 |
| Prps2       | 5.06514E-38 | 0.757642985 | 0.387 | 0.062 | 1.57288E-33 | KO | Prps2       | 0.325 |
| Snw1        | 6.34268E-38 | 0.82493388  | 0.513 | 0.112 | 1.96959E-33 | KO | Snw1        | 0.401 |
| Brip1os     | 6.90631E-38 | 1.27404183  | 0.273 | 0.027 | 2.14462E-33 | KO | Brip1os     | 0.246 |
| Pi4ka       | 6.94118E-38 | 0.92206651  | 0.353 | 0.051 | 2.15545E-33 | KO | Pi4ka       | 0.302 |
| Hp1bp3      | 7.32058E-38 | 0.756356019 | 0.639 | 0.169 | 2.27326E-33 | KO | Hp1bp3      | 0.47  |
| Hsp90b1     | 8.15769E-38 | 1.16393141  | 0.92  | 0.426 | 2.53321E-33 | KO | Hsp90b1     | 0.494 |
| Ddx18       | 8.18745E-38 | 0.731850065 | 0.471 | 0.095 | 2.54245E-33 | KO | Ddx18       | 0.376 |
| G3bp1       | 8.90164E-38 | 1.013160631 | 0.744 | 0.236 | 2.76423E-33 | KO | G3bp1       | 0.508 |
| Specc1l     | 9.2903E-38  | 0.875976634 | 0.387 | 0.063 | 2.88492E-33 | KO | Specc1l     | 0.324 |
| Skap1       | 9.84284E-38 | 0.935144935 | 0.672 | 0.191 | 3.0565E-33  | KO | Skap1       | 0.481 |
| Smad3       | 1.08054E-37 | 0.904641699 | 0.462 | 0.093 | 3.35539E-33 | KO | Smad3       | 0.369 |
| Ctsc        | 1.1335E-37  | 0.734728572 | 0.563 | 0.133 | 3.51987E-33 | KO | Ctsc        | 0.43  |
| Spata13     | 1.17908E-37 | 0.831039236 | 0.454 | 0.088 | 3.6614E-33  | KO | Spata13     | 0.366 |
| Efh2        | 1.23778E-37 | 0.740287045 | 0.697 | 0.196 | 3.84369E-33 | KO | Efh2        | 0.501 |
| Fam98b      | 1.27718E-37 | 1.212622611 | 0.34  | 0.048 | 3.96602E-33 | KO | Fam98b      | 0.292 |
| Dnmt3a      | 1.42335E-37 | 0.810222521 | 0.395 | 0.067 | 4.41993E-33 | KO | Dnmt3a      | 0.328 |
| Zfp148      | 1.62744E-37 | 0.841704189 | 0.441 | 0.084 | 5.05368E-33 | KO | Zfp148      | 0.357 |
| Col4a3bp    | 1.65458E-37 | 0.771501238 | 0.387 | 0.064 | 5.13797E-33 | KO | Col4a3bp    | 0.323 |
| Cnot4       | 1.67082E-37 | 0.909176798 | 0.378 | 0.062 | 5.18841E-33 | KO | Cnot4       | 0.316 |
| Khdrbs1     | 1.68268E-37 | 0.704359503 | 0.731 | 0.21  | 5.22524E-33 | KO | Khdrbs1     | 0.521 |
| Synj2bp     | 1.75994E-37 | 0.959293109 | 0.403 | 0.071 | 5.46514E-33 | KO | Synj2bp     | 0.332 |
| Cs          | 1.78869E-37 | 0.849513616 | 0.559 | 0.133 | 5.55443E-33 | KO | Cs          | 0.426 |
| Abce1       | 1.80005E-37 | 1.133249081 | 0.437 | 0.085 | 5.5897E-33  | KO | Abce1       | 0.352 |
| Rnf5        | 1.9428E-37  | 1.767599616 | 0.235 | 0.017 | 6.03299E-33 | KO | Rnf5        | 0.218 |
| Tnfrsf18    | 1.97587E-37 | 0.9691723   | 0.664 | 0.187 | 6.13567E-33 | KO | Tnfrsf18    | 0.477 |
| Gm17745     | 2.02296E-37 | 1.005702697 | 0.387 | 0.064 | 6.28189E-33 | KO | Gm17745     | 0.323 |
| Prkar2a     | 2.04299E-37 | 1.488293565 | 0.311 | 0.039 | 6.34409E-33 | KO | Prkar2a     | 0.272 |
| Myo10       | 2.16428E-37 | 1.514312121 | 0.345 | 0.051 | 6.72075E-33 | KO | Myo10       | 0.294 |
| Tipr1       | 2.17184E-37 | 0.896821408 | 0.651 | 0.182 | 6.74422E-33 | KO | Tipr1       | 0.469 |
| Ap3b1       | 2.18907E-37 | 0.766435407 | 0.525 | 0.118 | 6.79771E-33 | KO | Ap3b1       | 0.407 |
| Cbx6        | 2.25102E-37 | 0.861719451 | 0.319 | 0.041 | 6.99008E-33 | KO | Cbx6        | 0.278 |
| Nkg7        | 2.28123E-37 | 1.435523821 | 0.849 | 0.599 | 7.0839E-33  | KO | Nkg7        | 0.25  |
| Mcm6        | 2.36101E-37 | 1.002803739 | 0.639 | 0.18  | 7.33165E-33 | KO | Mcm6        | 0.459 |
| Bak1        | 2.50787E-37 | 0.853206241 | 0.496 | 0.107 | 7.78768E-33 | KO | Bak1        | 0.389 |
| Kmt2a       | 3.13688E-37 | 0.777273389 | 0.664 | 0.181 | 9.74094E-33 | KO | Kmt2a       | 0.483 |
| Tpm4        | 3.35056E-37 | 0.876058606 | 0.845 | 0.298 | 1.04045E-32 | KO | Tpm4        | 0.547 |

|          |             |             |       |       |             |    |          |       |
|----------|-------------|-------------|-------|-------|-------------|----|----------|-------|
| Ankrd13c | 3.35478E-37 | 0.937353382 | 0.387 | 0.064 | 1.04176E-32 | KO | Ankrd13c | 0.323 |
| Ppp1r3b  | 3.62214E-37 | 1.546149267 | 0.273 | 0.028 | 1.12478E-32 | KO | Ppp1r3b  | 0.245 |
| Actr1b   | 3.63697E-37 | 1.157292287 | 0.37  | 0.06  | 1.12939E-32 | KO | Actr1b   | 0.31  |
| Nadk     | 3.75622E-37 | 1.17995717  | 0.391 | 0.067 | 1.16642E-32 | KO | Nadk     | 0.324 |
| Ccng1    | 3.80645E-37 | 0.916331925 | 0.534 | 0.124 | 1.18202E-32 | KO | Ccng1    | 0.41  |
| Prkch    | 4.02498E-37 | 0.720317577 | 0.71  | 0.208 | 1.24988E-32 | KO | Prkch    | 0.502 |
| Ndufa1   | 4.0787E-37  | 0.902217386 | 0.866 | 0.311 | 1.26656E-32 | KO | Ndufa1   | 0.555 |
| Ubxn2a   | 4.29462E-37 | 0.935758024 | 0.361 | 0.056 | 1.33361E-32 | KO | Ubxn2a   | 0.305 |
| Med30    | 4.82358E-37 | 0.841816795 | 0.555 | 0.133 | 1.49787E-32 | KO | Med30    | 0.422 |
| Rtn4     | 4.88284E-37 | 0.771148006 | 0.618 | 0.159 | 1.51627E-32 | KO | Rtn4     | 0.459 |
| Phb      | 5.1448E-37  | 1.191924165 | 0.458 | 0.096 | 1.59761E-32 | KO | Phb      | 0.362 |
| Ncoa3    | 5.24367E-37 | 1.004366014 | 0.361 | 0.056 | 1.62832E-32 | KO | Ncoa3    | 0.305 |
| Mllt10   | 5.28085E-37 | 1.049179765 | 0.433 | 0.083 | 1.63986E-32 | KO | Mllt10   | 0.35  |
| Cdk5rap1 | 5.3207E-37  | 1.696482038 | 0.202 | 0.01  | 1.65224E-32 | KO | Cdk5rap1 | 0.192 |
| Ipo7     | 5.72154E-37 | 0.75766395  | 0.513 | 0.114 | 1.77671E-32 | KO | Ipo7     | 0.399 |
| Snrpg    | 5.7487E-37  | 1.099220056 | 0.887 | 0.394 | 1.78514E-32 | KO | Snrpg    | 0.493 |
| Rpa1     | 6.32549E-37 | 0.772214711 | 0.504 | 0.112 | 1.96425E-32 | KO | Rpa1     | 0.392 |
| Alcam    | 6.53474E-37 | 1.563211953 | 0.366 | 0.061 | 2.02923E-32 | KO | Alcam    | 0.305 |
| Psm2     | 6.6279E-37  | 0.754824891 | 0.63  | 0.167 | 2.05816E-32 | KO | Psm2     | 0.463 |
| Pbrm1    | 7.60225E-37 | 0.74146387  | 0.727 | 0.211 | 2.36073E-32 | KO | Pbrm1    | 0.516 |
| Mkl1     | 7.88354E-37 | 1.296356067 | 0.315 | 0.041 | 2.44807E-32 | KO | Mkl1     | 0.274 |
| Lrrc8d   | 8.72541E-37 | 1.080276459 | 0.29  | 0.034 | 2.7095E-32  | KO | Lrrc8d   | 0.256 |
| Ppwd1    | 8.76718E-37 | 0.843913367 | 0.374 | 0.062 | 2.72247E-32 | KO | Ppwd1    | 0.312 |
| Pabpc4   | 8.88779E-37 | 0.977229429 | 0.471 | 0.099 | 2.75993E-32 | KO | Pabpc4   | 0.372 |
| Hdac3    | 9.33847E-37 | 1.025820937 | 0.403 | 0.072 | 2.89987E-32 | KO | Hdac3    | 0.331 |
| Rpe      | 9.41358E-37 | 1.223717823 | 0.332 | 0.047 | 2.9232E-32  | KO | Rpe      | 0.285 |
| Epdr1    | 9.75048E-37 | 2.909633619 | 0.172 | 0.004 | 3.02782E-32 | KO | Epdr1    | 0.168 |
| Gpr171   | 1.07724E-36 | 0.811110198 | 0.483 | 0.103 | 3.34515E-32 | KO | Gpr171   | 0.38  |
| Pdpk1    | 1.11528E-36 | 0.816078665 | 0.412 | 0.075 | 3.46328E-32 | KO | Pdpk1    | 0.337 |
| Sipa1l1  | 1.34111E-36 | 0.829704326 | 0.521 | 0.118 | 4.16455E-32 | KO | Sipa1l1  | 0.403 |
| Mcm2     | 1.34286E-36 | 1.114259627 | 0.466 | 0.1   | 4.16998E-32 | KO | Mcm2     | 0.366 |
| Dennd1b  | 1.37591E-36 | 0.702269906 | 0.584 | 0.146 | 4.27261E-32 | KO | Dennd1b  | 0.438 |
| Podnl1   | 1.40459E-36 | 1.017940579 | 0.307 | 0.038 | 4.36166E-32 | KO | Podnl1   | 0.269 |
| Acat1    | 1.49723E-36 | 0.81136507  | 0.378 | 0.062 | 4.64936E-32 | KO | Acat1    | 0.316 |
| Hivep1   | 1.55219E-36 | 0.957717355 | 0.374 | 0.062 | 4.82003E-32 | KO | Hivep1   | 0.312 |
| Impact   | 1.63566E-36 | 1.409657798 | 0.349 | 0.054 | 5.0792E-32  | KO | Impact   | 0.295 |
| Tle3     | 1.73554E-36 | 0.955460994 | 0.475 | 0.102 | 5.38937E-32 | KO | Tle3     | 0.373 |
| Hars     | 1.78995E-36 | 0.98265761  | 0.424 | 0.081 | 5.55832E-32 | KO | Hars     | 0.343 |
| Pik3cg   | 1.8325E-36  | 0.994978225 | 0.328 | 0.045 | 5.69047E-32 | KO | Pik3cg   | 0.283 |
| Ints11   | 1.84496E-36 | 0.760327632 | 0.366 | 0.059 | 5.72916E-32 | KO | Ints11   | 0.307 |
| Runx2    | 1.98367E-36 | 0.715894204 | 0.706 | 0.206 | 6.15988E-32 | KO | Runx2    | 0.5   |
| Nrp1     | 1.99412E-36 | 1.095607005 | 0.357 | 0.056 | 6.19236E-32 | KO | Nrp1     | 0.301 |
| Ocel1    | 2.14681E-36 | 1.039052175 | 0.286 | 0.033 | 6.66648E-32 | KO | Ocel1    | 0.253 |
| Mnt      | 2.20017E-36 | 1.087195028 | 0.298 | 0.037 | 6.83219E-32 | KO | Mnt      | 0.261 |
| Igbbp1   | 2.35655E-36 | 0.775947282 | 0.479 | 0.104 | 7.31779E-32 | KO | Igbbp1   | 0.375 |
| Coro2a   | 2.36792E-36 | 0.759742157 | 0.487 | 0.108 | 7.35309E-32 | KO | Coro2a   | 0.379 |
| Tpr      | 2.44342E-36 | 0.798450426 | 0.811 | 0.272 | 7.58754E-32 | KO | Tpr      | 0.539 |
| Uba1     | 2.63553E-36 | 0.896281408 | 0.647 | 0.179 | 8.1841E-32  | KO | Uba1     | 0.468 |
| Ptbp3    | 2.654E-36   | 0.832890021 | 0.849 | 0.287 | 8.24148E-32 | KO | Ptbp3    | 0.562 |
| Srprb    | 2.91072E-36 | 1.337643076 | 0.29  | 0.035 | 9.03867E-32 | KO | Srprb    | 0.255 |
| Naxd     | 2.99235E-36 | 1.200787496 | 0.391 | 0.069 | 9.29216E-32 | KO | Naxd     | 0.322 |

|             |             |             |       |       |             |    |             |       |
|-------------|-------------|-------------|-------|-------|-------------|----|-------------|-------|
| Smarca5     | 3.09113E-36 | 0.931370353 | 0.769 | 0.249 | 9.5989E-32  | KO | Smarca5     | 0.52  |
| Atp2b1      | 3.12857E-36 | 0.934679917 | 0.685 | 0.202 | 9.71514E-32 | KO | Atp2b1      | 0.483 |
| Lrba        | 3.15183E-36 | 1.151786334 | 0.399 | 0.072 | 9.78737E-32 | KO | Lrba        | 0.327 |
| Chst2       | 3.40491E-36 | 1.322684946 | 0.294 | 0.036 | 1.05733E-31 | KO | Chst2       | 0.258 |
| Dnaja1      | 3.56067E-36 | 0.855049713 | 0.84  | 0.294 | 1.1057E-31  | KO | Dnaja1      | 0.546 |
| Btbd9       | 3.63913E-36 | 1.080724961 | 0.269 | 0.028 | 1.13006E-31 | KO | Btbd9       | 0.241 |
| Al467606    | 3.65412E-36 | 1.259552096 | 0.29  | 0.035 | 1.13471E-31 | KO | Al467606    | 0.255 |
| Exosc3      | 3.93139E-36 | 0.710936618 | 0.492 | 0.108 | 1.22082E-31 | KO | Exosc3      | 0.384 |
| Apeh        | 4.02074E-36 | 1.060718995 | 0.303 | 0.038 | 1.24856E-31 | KO | Apeh        | 0.265 |
| Stip1       | 4.28061E-36 | 0.796639613 | 0.546 | 0.132 | 1.32926E-31 | KO | Stip1       | 0.414 |
| Rbl2        | 4.85994E-36 | 0.762139004 | 0.655 | 0.184 | 1.50916E-31 | KO | Rbl2        | 0.471 |
| Pcbd2       | 4.92211E-36 | 0.908349734 | 0.458 | 0.094 | 1.52846E-31 | KO | Pcbd2       | 0.364 |
| Larp1       | 5.64607E-36 | 0.767590524 | 0.597 | 0.155 | 1.75327E-31 | KO | Larp1       | 0.442 |
| Wipf1       | 5.8161E-36  | 0.725945482 | 0.761 | 0.236 | 1.80607E-31 | KO | Wipf1       | 0.525 |
| Neat1       | 6.36551E-36 | 0.96144075  | 0.714 | 0.211 | 1.97668E-31 | KO | Neat1       | 0.503 |
| Smim3       | 6.53655E-36 | 1.037911413 | 0.395 | 0.072 | 2.02979E-31 | KO | Smim3       | 0.323 |
| 0610010K14R | 6.75929E-36 | 1.074032462 | 0.412 | 0.078 | 2.09896E-31 | KO | 0610010K14R | 0.334 |
| Dnm1l       | 6.76803E-36 | 1.058278133 | 0.378 | 0.064 | 2.10168E-31 | KO | Dnm1l       | 0.314 |
| Cox16       | 7.03838E-36 | 1.185257826 | 0.273 | 0.03  | 2.18563E-31 | KO | Cox16       | 0.243 |
| Ttc39b      | 7.08187E-36 | 0.696798787 | 0.613 | 0.161 | 2.19913E-31 | KO | Ttc39b      | 0.452 |
| Ankra2      | 7.18537E-36 | 0.823614796 | 0.277 | 0.031 | 2.23127E-31 | KO | Ankra2      | 0.246 |
| Myo1g       | 7.28755E-36 | 0.889467015 | 0.685 | 0.202 | 2.263E-31   | KO | Myo1g       | 0.483 |
| 1810022K09R | 7.31963E-36 | 0.7193703   | 0.689 | 0.194 | 2.27296E-31 | KO | 1810022K09R | 0.495 |
| Aagab       | 7.72896E-36 | 1.435513533 | 0.256 | 0.025 | 2.40007E-31 | KO | Aagab       | 0.231 |
| Bcl11b      | 8.21327E-36 | 0.726442896 | 0.605 | 0.158 | 2.55047E-31 | KO | Bcl11b      | 0.447 |
| Trim56      | 8.94727E-36 | 1.554129611 | 0.307 | 0.04  | 2.7784E-31  | KO | Trim56      | 0.267 |
| Pmaip1      | 9.33888E-36 | 1.064466935 | 0.374 | 0.063 | 2.9E-31     | KO | Pmaip1      | 0.311 |
| Flt3l       | 9.59579E-36 | 0.858031715 | 0.303 | 0.038 | 2.97978E-31 | KO | Flt3l       | 0.265 |
| Lpcat4      | 1.01116E-35 | 2.029825873 | 0.231 | 0.018 | 3.13996E-31 | KO | Lpcat4      | 0.213 |
| Selenoi     | 1.04409E-35 | 1.098600106 | 0.361 | 0.059 | 3.2422E-31  | KO | Selenoi     | 0.302 |
| Tmem163     | 1.05361E-35 | 1.076111548 | 0.315 | 0.042 | 3.27176E-31 | KO | Tmem163     | 0.273 |
| Tnpo3       | 1.10231E-35 | 0.704734612 | 0.483 | 0.105 | 3.42301E-31 | KO | Tnpo3       | 0.378 |
| Glrx2       | 1.1638E-35  | 0.809222743 | 0.504 | 0.116 | 3.61396E-31 | KO | Glrx2       | 0.388 |
| Irak1       | 1.19078E-35 | 0.798174153 | 0.529 | 0.126 | 3.69773E-31 | KO | Irak1       | 0.403 |
| Srbd1       | 1.21668E-35 | 1.573550609 | 0.252 | 0.024 | 3.77816E-31 | KO | Srbd1       | 0.228 |
| Sptbn1      | 1.2217E-35  | 0.728055336 | 0.542 | 0.131 | 3.79373E-31 | KO | Sptbn1      | 0.411 |
| Shisa5      | 1.26002E-35 | 0.912196558 | 0.929 | 0.406 | 3.91275E-31 | KO | Shisa5      | 0.523 |
| Dcun1d1     | 1.30961E-35 | 0.967253901 | 0.361 | 0.06  | 4.06672E-31 | KO | Dcun1d1     | 0.301 |
| Ezh2        | 1.40523E-35 | 1.256653573 | 0.475 | 0.108 | 4.36365E-31 | KO | Ezh2        | 0.367 |
| Capn2       | 1.40727E-35 | 0.760068695 | 0.391 | 0.069 | 4.37E-31    | KO | Capn2       | 0.322 |
| Casp8ap2    | 1.41728E-35 | 0.889888789 | 0.445 | 0.091 | 4.40108E-31 | KO | Casp8ap2    | 0.354 |
| Sbds        | 1.45501E-35 | 0.855834075 | 0.437 | 0.088 | 4.51824E-31 | KO | Sbds        | 0.349 |
| Bcr         | 1.46607E-35 | 0.760015163 | 0.319 | 0.044 | 4.55258E-31 | KO | Bcr         | 0.275 |
| Hspa1b      | 1.49643E-35 | 2.133930781 | 0.353 | 0.06  | 4.64688E-31 | KO | Hspa1b      | 0.293 |
| Cdk2ap1     | 1.50749E-35 | 1.077776823 | 0.412 | 0.078 | 4.68121E-31 | KO | Cdk2ap1     | 0.334 |
| Ap1s3       | 1.62342E-35 | 1.556366892 | 0.223 | 0.016 | 5.04121E-31 | KO | Ap1s3       | 0.207 |
| Pigp        | 1.62818E-35 | 0.740038004 | 0.408 | 0.076 | 5.056E-31   | KO | Pigp        | 0.332 |
| Rgs1        | 1.66383E-35 | 1.214937441 | 0.832 | 0.322 | 5.16669E-31 | KO | Rgs1        | 0.51  |
| Dnttip2     | 1.66914E-35 | 1.204922322 | 0.34  | 0.053 | 5.18319E-31 | KO | Dnttip2     | 0.287 |
| Tmem30a     | 1.83833E-35 | 0.870792428 | 0.618 | 0.17  | 5.70856E-31 | KO | Tmem30a     | 0.448 |
| Pqlc3       | 1.95922E-35 | 1.004505031 | 0.328 | 0.048 | 6.08397E-31 | KO | Pqlc3       | 0.28  |



|             |             |             |       |       |             |    |             |       |
|-------------|-------------|-------------|-------|-------|-------------|----|-------------|-------|
| Bbip1       | 2.0204E-35  | 0.94443143  | 0.395 | 0.072 | 6.27394E-31 | KO | Bbip1       | 0.323 |
| Tomm7       | 2.06733E-35 | 0.988162372 | 0.933 | 0.438 | 6.41969E-31 | KO | Tomm7       | 0.495 |
| Ddx21       | 2.105E-35   | 0.969216875 | 0.525 | 0.128 | 6.53666E-31 | KO | Ddx21       | 0.397 |
| Nono        | 2.29722E-35 | 0.777779561 | 0.79  | 0.255 | 7.13355E-31 | KO | Nono        | 0.535 |
| Eif4g1      | 2.37994E-35 | 0.699869782 | 0.693 | 0.203 | 7.39042E-31 | KO | Eif4g1      | 0.49  |
| Cnot6       | 2.38975E-35 | 0.754260376 | 0.618 | 0.163 | 7.4209E-31  | KO | Cnot6       | 0.455 |
| Gtdc1       | 2.40434E-35 | 1.962675282 | 0.269 | 0.03  | 7.4662E-31  | KO | Gtdc1       | 0.239 |
| Ppp2r2d     | 2.41517E-35 | 0.872272392 | 0.403 | 0.075 | 7.49982E-31 | KO | Ppp2r2d     | 0.328 |
| Mllt3       | 2.49296E-35 | 1.073346457 | 0.466 | 0.1   | 7.74139E-31 | KO | Mllt3       | 0.366 |
| Lockd       | 2.66866E-35 | 1.107175406 | 0.471 | 0.106 | 8.28698E-31 | KO | Lockd       | 0.365 |
| Dcps        | 2.72243E-35 | 0.875216263 | 0.416 | 0.08  | 8.45396E-31 | KO | Dcps        | 0.336 |
| A930024E05R | 3.17616E-35 | 1.820569826 | 0.21  | 0.013 | 9.86293E-31 | KO | A930024E05R | 0.197 |
| Lars        | 3.48209E-35 | 0.834818086 | 0.416 | 0.081 | 1.08129E-30 | KO | Lars        | 0.335 |
| Wdr82       | 3.49937E-35 | 1.337413311 | 0.349 | 0.057 | 1.08666E-30 | KO | Wdr82       | 0.292 |
| Cyb5b       | 3.75113E-35 | 0.706043528 | 0.517 | 0.122 | 1.16484E-30 | KO | Cyb5b       | 0.395 |
| Ebna1bp2    | 3.75144E-35 | 0.711466072 | 0.567 | 0.14  | 1.16493E-30 | KO | Ebna1bp2    | 0.427 |
| Aff1        | 3.78041E-35 | 0.881036359 | 0.277 | 0.032 | 1.17393E-30 | KO | Aff1        | 0.245 |
| Igtp        | 4.05587E-35 | 1.132462169 | 0.391 | 0.072 | 1.25947E-30 | KO | Igtp        | 0.319 |
| Cers6       | 4.17117E-35 | 1.347068982 | 0.256 | 0.026 | 1.29527E-30 | KO | Cers6       | 0.23  |
| Nars        | 4.19195E-35 | 0.783251257 | 0.458 | 0.097 | 1.30173E-30 | KO | Nars        | 0.361 |
| Ccnd2       | 4.32549E-35 | 1.048903889 | 0.71  | 0.228 | 1.34319E-30 | KO | Ccnd2       | 0.482 |
| Hilpda      | 4.70493E-35 | 0.79705141  | 0.744 | 0.236 | 1.46102E-30 | KO | Hilpda      | 0.508 |
| Hexb        | 5.10096E-35 | 1.087953192 | 0.311 | 0.043 | 1.584E-30   | KO | Hexb        | 0.268 |
| Cnn2        | 5.37727E-35 | 0.913245599 | 0.853 | 0.316 | 1.6698E-30  | KO | Cnn2        | 0.537 |
| Sod1        | 5.40139E-35 | 0.782734289 | 0.798 | 0.258 | 1.67729E-30 | KO | Sod1        | 0.54  |
| Ybx3        | 5.50747E-35 | 1.068802836 | 0.739 | 0.252 | 1.71023E-30 | KO | Ybx3        | 0.487 |
| Clcf1       | 5.56851E-35 | 1.524980411 | 0.235 | 0.02  | 1.72919E-30 | KO | Clcf1       | 0.215 |
| Lamb3       | 5.63419E-35 | 1.92899607  | 0.235 | 0.02  | 1.74958E-30 | KO | Lamb3       | 0.215 |
| Adam10      | 5.79578E-35 | 0.969620139 | 0.429 | 0.088 | 1.79976E-30 | KO | Adam10      | 0.341 |
| Birc3       | 6.56632E-35 | 1.266271924 | 0.408 | 0.081 | 2.03904E-30 | KO | Birc3       | 0.327 |
| Prpf6       | 6.86671E-35 | 1.289139635 | 0.311 | 0.043 | 2.13232E-30 | KO | Prpf6       | 0.268 |
| Kcnn4       | 7.19704E-35 | 1.039739249 | 0.483 | 0.112 | 2.2349E-30  | KO | Kcnn4       | 0.371 |
| Pus1        | 7.27642E-35 | 1.389289996 | 0.319 | 0.047 | 2.25955E-30 | KO | Pus1        | 0.272 |
| Mfsd14a     | 7.35539E-35 | 0.818951023 | 0.37  | 0.063 | 2.28407E-30 | KO | Mfsd14a     | 0.307 |
| Rin3        | 8.13542E-35 | 1.06759467  | 0.332 | 0.051 | 2.52629E-30 | KO | Rin3        | 0.281 |
| Spty2d1     | 8.75042E-35 | 1.05433477  | 0.34  | 0.054 | 2.71727E-30 | KO | Spty2d1     | 0.286 |
| Minpp1      | 9.63859E-35 | 1.143783832 | 0.303 | 0.04  | 2.99307E-30 | KO | Minpp1      | 0.263 |
| Mark2       | 1.00819E-34 | 0.72670717  | 0.571 | 0.146 | 3.13073E-30 | KO | Mark2       | 0.425 |
| Fyb         | 1.03813E-34 | 0.763839626 | 0.87  | 0.309 | 3.22369E-30 | KO | Fyb         | 0.561 |
| Cbx1        | 1.05358E-34 | 0.840465248 | 0.513 | 0.123 | 3.27167E-30 | KO | Cbx1        | 0.39  |
| Trac        | 1.07853E-34 | 1.000186007 | 0.924 | 0.466 | 3.34917E-30 | KO | Trac        | 0.458 |
| Fam103a1    | 1.09465E-34 | 0.908616848 | 0.513 | 0.123 | 3.39922E-30 | KO | Fam103a1    | 0.39  |
| Stard3nl    | 1.19752E-34 | 0.823808386 | 0.399 | 0.075 | 3.71867E-30 | KO | Stard3nl    | 0.324 |
| Cdc123      | 1.21147E-34 | 0.743178341 | 0.433 | 0.088 | 3.76197E-30 | KO | Cdc123      | 0.345 |
| Zfp384      | 1.21551E-34 | 1.174901857 | 0.244 | 0.023 | 3.77452E-30 | KO | Zfp384      | 0.221 |
| Ilvbl       | 1.32175E-34 | 0.85872854  | 0.298 | 0.039 | 4.10444E-30 | KO | Ilvbl       | 0.259 |
| Rabep1      | 1.32975E-34 | 1.475032677 | 0.319 | 0.047 | 4.12926E-30 | KO | Rabep1      | 0.272 |
| Ywhah       | 1.36377E-34 | 0.818539684 | 0.798 | 0.273 | 4.23492E-30 | KO | Ywhah       | 0.525 |
| Far1        | 1.36537E-34 | 0.855521469 | 0.487 | 0.111 | 4.2399E-30  | KO | Far1        | 0.376 |
| Adam8       | 1.42957E-34 | 0.784092951 | 0.462 | 0.1   | 4.43924E-30 | KO | Adam8       | 0.362 |
| Rad50       | 1.45206E-34 | 0.994435542 | 0.378 | 0.068 | 4.50908E-30 | KO | Rad50       | 0.31  |

|          |             |             |       |       |             |    |          |       |
|----------|-------------|-------------|-------|-------|-------------|----|----------|-------|
| Efcab14  | 1.57579E-34 | 0.881993454 | 0.361 | 0.062 | 4.8933E-30  | KO | Efcab14  | 0.299 |
| Bloc1s1  | 1.58789E-34 | 1.121406671 | 0.277 | 0.033 | 4.93089E-30 | KO | Bloc1s1  | 0.244 |
| Rnf14    | 1.63287E-34 | 0.861188901 | 0.324 | 0.048 | 5.07056E-30 | KO | Rnf14    | 0.276 |
| Jaml     | 1.66166E-34 | 1.48745657  | 0.29  | 0.038 | 5.15997E-30 | KO | Jaml     | 0.252 |
| Plscr1   | 1.76595E-34 | 0.901102825 | 0.466 | 0.104 | 5.48381E-30 | KO | Plscr1   | 0.362 |
| Galk2    | 1.86303E-34 | 1.371087711 | 0.269 | 0.031 | 5.78528E-30 | KO | Galk2    | 0.238 |
| Gm26532  | 2.1575E-34  | 1.61279457  | 0.252 | 0.026 | 6.69969E-30 | KO | Gm26532  | 0.226 |
| Rai1     | 2.27405E-34 | 1.230440185 | 0.269 | 0.031 | 7.0616E-30  | KO | Rai1     | 0.238 |
| Sh3bp1   | 2.66801E-34 | 0.759770197 | 0.412 | 0.08  | 8.28497E-30 | KO | Sh3bp1   | 0.332 |
| Aftph    | 2.95991E-34 | 0.725936371 | 0.433 | 0.088 | 9.19142E-30 | KO | Aftph    | 0.345 |
| Magohb   | 3.01521E-34 | 1.239901619 | 0.408 | 0.081 | 9.36312E-30 | KO | Magohb   | 0.327 |
| Acadl    | 3.19816E-34 | 0.77015496  | 0.651 | 0.186 | 9.93123E-30 | KO | Acadl    | 0.465 |
| Hspa14   | 3.45573E-34 | 0.777509308 | 0.517 | 0.125 | 1.07311E-29 | KO | Hspa14   | 0.392 |
| Ciabin1  | 3.56237E-34 | 0.753391544 | 0.765 | 0.253 | 1.10622E-29 | KO | Ciabin1  | 0.512 |
| Ifi27l2a | 3.68664E-34 | 1.4152959   | 0.79  | 0.32  | 1.14481E-29 | KO | Ifi27l2a | 0.47  |
| Rnaseh2b | 3.70363E-34 | 1.001524144 | 0.416 | 0.083 | 1.15009E-29 | KO | Rnaseh2b | 0.333 |
| Endod1   | 4.31094E-34 | 0.810209406 | 0.336 | 0.053 | 1.33868E-29 | KO | Endod1   | 0.283 |
| Mef2a    | 4.32133E-34 | 0.73208962  | 0.403 | 0.077 | 1.3419E-29  | KO | Mef2a    | 0.326 |
| Cd8b1    | 4.53695E-34 | 1.137328228 | 0.773 | 0.307 | 1.40886E-29 | KO | Cd8b1    | 0.466 |
| Dtx3l    | 4.60072E-34 | 1.222835153 | 0.328 | 0.051 | 1.42866E-29 | KO | Dtx3l    | 0.277 |
| Ccl3     | 4.61477E-34 | 1.287976338 | 0.437 | 0.094 | 1.43303E-29 | KO | Ccl3     | 0.343 |
| Mta3     | 4.733E-34   | 0.777226459 | 0.387 | 0.071 | 1.46974E-29 | KO | Mta3     | 0.316 |
| Acbd3    | 4.89485E-34 | 1.104182955 | 0.403 | 0.08  | 1.52E-29    | KO | Acbd3    | 0.323 |
| Xlr      | 5.07549E-34 | 4.100817348 | 0.139 | 0     | 1.57609E-29 | KO | Xlr      | 0.139 |
| Sh2d2a   | 5.18839E-34 | 1.085752873 | 0.908 | 0.46  | 1.61115E-29 | KO | Sh2d2a   | 0.448 |
| Cldnd1   | 5.2856E-34  | 1.059432265 | 0.336 | 0.054 | 1.64134E-29 | KO | Cldnd1   | 0.282 |
| Opa3     | 5.59175E-34 | 1.402781062 | 0.223 | 0.018 | 1.73641E-29 | KO | Opa3     | 0.205 |
| Paip1    | 5.82638E-34 | 1.140399914 | 0.248 | 0.025 | 1.80927E-29 | KO | Paip1    | 0.223 |
| Ddi2     | 6.04755E-34 | 1.459171095 | 0.319 | 0.048 | 1.87795E-29 | KO | Ddi2     | 0.271 |
| Pcnt     | 6.48599E-34 | 0.799956775 | 0.324 | 0.049 | 2.01409E-29 | KO | Pcnt     | 0.275 |
| Sik3     | 6.98933E-34 | 0.707335003 | 0.433 | 0.089 | 2.1704E-29  | KO | Sik3     | 0.344 |
| Hsd11b1  | 7.01988E-34 | 1.111272018 | 0.273 | 0.033 | 2.17988E-29 | KO | Hsd11b1  | 0.24  |
| Pced1b   | 7.16047E-34 | 1.285271976 | 0.256 | 0.028 | 2.22354E-29 | KO | Pced1b   | 0.228 |
| Trim12c  | 7.34845E-34 | 1.182297746 | 0.29  | 0.038 | 2.28192E-29 | KO | Trim12c  | 0.252 |
| Mcm3     | 7.47645E-34 | 1.416890057 | 0.508 | 0.135 | 2.32166E-29 | KO | Mcm3     | 0.373 |
| Fuca2    | 7.75843E-34 | 0.844648549 | 0.303 | 0.042 | 2.40923E-29 | KO | Fuca2    | 0.261 |
| Il3ra    | 7.91141E-34 | 0.802848363 | 0.328 | 0.05  | 2.45673E-29 | KO | Il3ra    | 0.278 |
| Capzb    | 7.95185E-34 | 0.963394692 | 0.924 | 0.412 | 2.46929E-29 | KO | Capzb    | 0.512 |
| Sltm     | 8.4473E-34  | 0.808621543 | 0.613 | 0.172 | 2.62314E-29 | KO | Sltm     | 0.441 |
| Lig1     | 8.50662E-34 | 1.310490432 | 0.525 | 0.138 | 2.64156E-29 | KO | Lig1     | 0.387 |
| Ern1     | 8.66721E-34 | 1.000553457 | 0.244 | 0.024 | 2.69143E-29 | KO | Ern1     | 0.22  |
| Gatad1   | 9.84463E-34 | 0.816995491 | 0.458 | 0.103 | 3.05705E-29 | KO | Gatad1   | 0.355 |
| Noc2l    | 1.07691E-33 | 0.726106601 | 0.521 | 0.127 | 3.34413E-29 | KO | Noc2l    | 0.394 |
| Slc37a2  | 1.12674E-33 | 1.613397339 | 0.218 | 0.017 | 3.49887E-29 | KO | Slc37a2  | 0.201 |
| Trnt1    | 1.16971E-33 | 1.012520608 | 0.429 | 0.089 | 3.63231E-29 | KO | Trnt1    | 0.34  |
| Paics    | 1.22394E-33 | 0.745309842 | 0.534 | 0.134 | 3.8007E-29  | KO | Paics    | 0.4   |
| Taf1     | 1.27394E-33 | 0.797654901 | 0.391 | 0.074 | 3.95597E-29 | KO | Taf1     | 0.317 |
| Zc3h4    | 1.29709E-33 | 1.255231322 | 0.29  | 0.038 | 4.02784E-29 | KO | Zc3h4    | 0.252 |
| Banp     | 1.30882E-33 | 1.508745567 | 0.252 | 0.027 | 4.06429E-29 | KO | Banp     | 0.225 |
| Runx3    | 1.36732E-33 | 0.834129188 | 0.777 | 0.265 | 4.24594E-29 | KO | Runx3    | 0.512 |
| Sept7    | 1.40627E-33 | 0.755069151 | 0.836 | 0.297 | 4.36689E-29 | KO | Sept7    | 0.539 |

|              |             |             |       |       |             |    |              |       |
|--------------|-------------|-------------|-------|-------|-------------|----|--------------|-------|
| Vrk3         | 1.43671E-33 | 0.699253774 | 0.311 | 0.045 | 4.46141E-29 | KO | Vrk3         | 0.266 |
| Chst12       | 1.45003E-33 | 0.696670331 | 0.357 | 0.062 | 4.50278E-29 | KO | Chst12       | 0.295 |
| Abhd2        | 1.49292E-33 | 0.944143465 | 0.361 | 0.062 | 4.63597E-29 | KO | Abhd2        | 0.299 |
| Itgb1        | 1.72836E-33 | 1.143338145 | 0.731 | 0.241 | 5.36707E-29 | KO | Itgb1        | 0.49  |
| Mat2a        | 1.84928E-33 | 0.787235549 | 0.546 | 0.141 | 5.74257E-29 | KO | Mat2a        | 0.405 |
| Tmem229b     | 1.88807E-33 | 1.182748587 | 0.252 | 0.027 | 5.86303E-29 | KO | Tmem229b     | 0.225 |
| Rb1          | 2.01176E-33 | 1.032671939 | 0.307 | 0.044 | 6.24713E-29 | KO | Rb1          | 0.263 |
| Ufsp2        | 2.0704E-33  | 1.161621566 | 0.307 | 0.045 | 6.42921E-29 | KO | Ufsp2        | 0.262 |
| Fubp1        | 2.14027E-33 | 0.722658663 | 0.739 | 0.234 | 6.64618E-29 | KO | Fubp1        | 0.505 |
| Akap13       | 2.38459E-33 | 1.025355656 | 0.937 | 0.485 | 7.40488E-29 | KO | Akap13       | 0.452 |
| Add3         | 2.68928E-33 | 0.835117343 | 0.324 | 0.05  | 8.35103E-29 | KO | Add3         | 0.274 |
| Serpine2     | 2.69746E-33 | 1.954472337 | 0.324 | 0.054 | 8.37641E-29 | KO | Serpine2     | 0.27  |
| Sms          | 2.83614E-33 | 0.878295174 | 0.685 | 0.213 | 8.80707E-29 | KO | Sms          | 0.472 |
| Rcn1         | 2.85217E-33 | 0.792089988 | 0.336 | 0.055 | 8.85686E-29 | KO | Rcn1         | 0.281 |
| Elavl1       | 2.91723E-33 | 0.697860768 | 0.647 | 0.188 | 9.05887E-29 | KO | Elavl1       | 0.459 |
| Fam204a      | 2.98729E-33 | 0.735188809 | 0.416 | 0.086 | 9.27642E-29 | KO | Fam204a      | 0.33  |
| Cd96         | 3.07515E-33 | 0.746091915 | 0.412 | 0.082 | 9.54925E-29 | KO | Cd96         | 0.33  |
| Mov10        | 3.09091E-33 | 1.244713231 | 0.244 | 0.025 | 9.59819E-29 | KO | Mov10        | 0.219 |
| Dnajib11     | 3.29064E-33 | 0.714470306 | 0.492 | 0.119 | 1.02184E-28 | KO | Dnajib11     | 0.373 |
| Perp         | 3.41132E-33 | 1.418221372 | 0.244 | 0.025 | 1.05932E-28 | KO | Perp         | 0.219 |
| Ddb1         | 3.57158E-33 | 0.693337588 | 0.664 | 0.193 | 1.10908E-28 | KO | Ddb1         | 0.471 |
| Cbx5         | 3.6539E-33  | 0.968412103 | 0.521 | 0.134 | 1.13465E-28 | KO | Cbx5         | 0.387 |
| Stard4       | 3.71339E-33 | 1.083745255 | 0.391 | 0.077 | 1.15312E-28 | KO | Stard4       | 0.314 |
| Ets2         | 3.77013E-33 | 0.943847596 | 0.315 | 0.048 | 1.17074E-28 | KO | Ets2         | 0.267 |
| Cd47         | 3.88482E-33 | 0.960445009 | 0.882 | 0.363 | 1.20635E-28 | KO | Cd47         | 0.519 |
| Myh9         | 3.99259E-33 | 0.950990534 | 0.912 | 0.409 | 1.23982E-28 | KO | Myh9         | 0.503 |
| Thap2        | 4.05584E-33 | 1.692737352 | 0.239 | 0.024 | 1.25946E-28 | KO | Thap2        | 0.215 |
| H2-Q7        | 4.18738E-33 | 1.022223712 | 0.95  | 0.653 | 1.30031E-28 | KO | H2-Q7        | 0.297 |
| Usp50        | 4.22205E-33 | 1.068224561 | 0.353 | 0.062 | 1.31107E-28 | KO | Usp50        | 0.291 |
| Agps         | 4.39048E-33 | 0.891976323 | 0.332 | 0.054 | 1.36338E-28 | KO | Agps         | 0.278 |
| Phactr2      | 4.77695E-33 | 1.093539393 | 0.29  | 0.039 | 1.48339E-28 | KO | Phactr2      | 0.251 |
| Ptms         | 4.84381E-33 | 0.962733139 | 0.765 | 0.277 | 1.50415E-28 | KO | Ptms         | 0.488 |
| Cox7c        | 5.1072E-33  | 0.864215405 | 0.941 | 0.593 | 1.58594E-28 | KO | Cox7c        | 0.348 |
| Rilpl2       | 5.19168E-33 | 0.818824839 | 0.609 | 0.172 | 1.61217E-28 | KO | Rilpl2       | 0.437 |
| Mrpl21       | 5.97135E-33 | 0.863447279 | 0.521 | 0.128 | 1.85428E-28 | KO | Mrpl21       | 0.393 |
| 9530068E07Ri | 6.06269E-33 | 0.697350592 | 0.487 | 0.113 | 1.88265E-28 | KO | 9530068E07Ri | 0.374 |
| Dapk2        | 6.06717E-33 | 1.901343229 | 0.218 | 0.018 | 1.88404E-28 | KO | Dapk2        | 0.2   |
| Hnrnpa0      | 6.73934E-33 | 0.905942958 | 0.891 | 0.374 | 2.09277E-28 | KO | Hnrnpa0      | 0.517 |
| Hpf1         | 6.78852E-33 | 0.743273718 | 0.634 | 0.188 | 2.10804E-28 | KO | Hpf1         | 0.446 |
| Mepce        | 7.44554E-33 | 0.855588659 | 0.361 | 0.064 | 2.31206E-28 | KO | Mepce        | 0.297 |
| Tollip       | 7.47886E-33 | 0.887195533 | 0.298 | 0.042 | 2.32241E-28 | KO | Tollip       | 0.256 |
| Dhps         | 7.54416E-33 | 1.094979436 | 0.395 | 0.078 | 2.34269E-28 | KO | Dhps         | 0.317 |
| Tmem230      | 8.59373E-33 | 0.993367702 | 0.273 | 0.035 | 2.66861E-28 | KO | Tmem230      | 0.238 |
| Nrm          | 1.00584E-32 | 0.885428049 | 0.345 | 0.06  | 3.12344E-28 | KO | Nrm          | 0.285 |
| Sppl2a       | 1.07312E-32 | 0.701822679 | 0.416 | 0.086 | 3.33236E-28 | KO | Sppl2a       | 0.33  |
| Baiap2       | 1.08305E-32 | 1.28796854  | 0.282 | 0.038 | 3.36318E-28 | KO | Baiap2       | 0.244 |
| Traf3ip3     | 1.14621E-32 | 0.777561635 | 0.45  | 0.102 | 3.55931E-28 | KO | Traf3ip3     | 0.348 |
| Micu2        | 1.15407E-32 | 0.89286432  | 0.349 | 0.061 | 3.58373E-28 | KO | Micu2        | 0.288 |
| Lsm8         | 1.25317E-32 | 0.763117248 | 0.584 | 0.162 | 3.89146E-28 | KO | Lsm8         | 0.422 |
| Hook3        | 1.34171E-32 | 0.742946218 | 0.382 | 0.073 | 4.16642E-28 | KO | Hook3        | 0.309 |
| Plagl2       | 1.38975E-32 | 0.985628467 | 0.286 | 0.039 | 4.31558E-28 | KO | Plagl2       | 0.247 |

|          |             |             |       |       |             |    |          |       |
|----------|-------------|-------------|-------|-------|-------------|----|----------|-------|
| Slc9a1   | 1.42954E-32 | 0.983516727 | 0.273 | 0.035 | 4.43916E-28 | KO | Slc9a1   | 0.238 |
| Rbbp8    | 1.48077E-32 | 0.70338161  | 0.345 | 0.059 | 4.59824E-28 | KO | Rbbp8    | 0.286 |
| Tmem258  | 1.4848E-32  | 0.753381788 | 0.782 | 0.268 | 4.61076E-28 | KO | Tmem258  | 0.514 |
| Parvg    | 1.52515E-32 | 0.743387632 | 0.403 | 0.083 | 4.73606E-28 | KO | Parvg    | 0.32  |
| Psip1    | 1.58745E-32 | 0.821730177 | 0.496 | 0.123 | 4.9295E-28  | KO | Psip1    | 0.373 |
| Mms22l   | 1.65852E-32 | 0.858558058 | 0.319 | 0.05  | 5.1502E-28  | KO | Mms22l   | 0.269 |
| Impa1    | 1.71208E-32 | 0.815234925 | 0.429 | 0.092 | 5.31652E-28 | KO | Impa1    | 0.337 |
| Klf10    | 1.78509E-32 | 1.630337385 | 0.244 | 0.026 | 5.54325E-28 | KO | Klf10    | 0.218 |
| Nde1     | 1.82461E-32 | 0.922131168 | 0.366 | 0.067 | 5.66597E-28 | KO | Nde1     | 0.299 |
| Pes1     | 1.88491E-32 | 0.930245108 | 0.336 | 0.057 | 5.8532E-28  | KO | Pes1     | 0.279 |
| Ssbp3    | 2.2551E-32  | 0.855041738 | 0.525 | 0.135 | 7.00278E-28 | KO | Ssbp3    | 0.39  |
| Mthfd1   | 2.41379E-32 | 1.224262937 | 0.34  | 0.06  | 7.49555E-28 | KO | Mthfd1   | 0.28  |
| Pdcl     | 2.43828E-32 | 1.580188933 | 0.252 | 0.029 | 7.57158E-28 | KO | Pdcl     | 0.223 |
| Gbp2     | 2.44546E-32 | 1.245800227 | 0.311 | 0.048 | 7.59389E-28 | KO | Gbp2     | 0.263 |
| Tet3     | 2.47833E-32 | 0.723403739 | 0.378 | 0.072 | 7.69596E-28 | KO | Tet3     | 0.306 |
| Ints7    | 2.48489E-32 | 0.82345946  | 0.298 | 0.043 | 7.71632E-28 | KO | Ints7    | 0.255 |
| Aebp2    | 2.49041E-32 | 0.840836643 | 0.849 | 0.336 | 7.73348E-28 | KO | Aebp2    | 0.513 |
| Cep41    | 2.51103E-32 | 2.275858839 | 0.189 | 0.012 | 7.79751E-28 | KO | Cep41    | 0.177 |
| Herc6    | 2.5895E-32  | 1.514498762 | 0.252 | 0.029 | 8.04118E-28 | KO | Herc6    | 0.223 |
| Impa2    | 2.72744E-32 | 0.716302904 | 0.529 | 0.136 | 8.46951E-28 | KO | Impa2    | 0.393 |
| Furin    | 2.84467E-32 | 1.304399221 | 0.42  | 0.092 | 8.83355E-28 | KO | Furin    | 0.328 |
| Colgalt1 | 3.18187E-32 | 0.938310627 | 0.328 | 0.054 | 9.88066E-28 | KO | Colgalt1 | 0.274 |
| Ccdc6    | 3.30076E-32 | 0.725543289 | 0.378 | 0.073 | 1.02498E-27 | KO | Ccdc6    | 0.305 |
| Inf2     | 3.41694E-32 | 0.817191192 | 0.349 | 0.062 | 1.06106E-27 | KO | Inf2     | 0.287 |
| Ppfia1   | 3.42402E-32 | 0.781979821 | 0.303 | 0.045 | 1.06326E-27 | KO | Ppfia1   | 0.258 |
| Borcs8   | 3.53051E-32 | 0.714015817 | 0.433 | 0.093 | 1.09633E-27 | KO | Borcs8   | 0.34  |
| Hnrnpc   | 3.72698E-32 | 0.707959528 | 0.807 | 0.27  | 1.15734E-27 | KO | Hnrnpc   | 0.537 |
| Dnmt1    | 3.96607E-32 | 1.250580092 | 0.513 | 0.141 | 1.23158E-27 | KO | Dnmt1    | 0.372 |
| Arid4a   | 4.21189E-32 | 1.018123826 | 0.403 | 0.083 | 1.30792E-27 | KO | Arid4a   | 0.32  |
| Fam114a2 | 4.28813E-32 | 0.724887884 | 0.311 | 0.048 | 1.33159E-27 | KO | Fam114a2 | 0.263 |
| Bcl2l11  | 4.42733E-32 | 0.959220651 | 0.529 | 0.139 | 1.37482E-27 | KO | Bcl2l11  | 0.39  |
| Slc30a5  | 4.47214E-32 | 1.020243642 | 0.324 | 0.053 | 1.38873E-27 | KO | Slc30a5  | 0.271 |
| Stx6     | 4.84309E-32 | 1.059765181 | 0.366 | 0.068 | 1.50393E-27 | KO | Stx6     | 0.298 |
| Prelid2  | 4.89653E-32 | 0.875898048 | 0.374 | 0.072 | 1.52052E-27 | KO | Prelid2  | 0.302 |
| Lpgat1   | 4.94348E-32 | 1.311816628 | 0.29  | 0.042 | 1.5351E-27  | KO | Lpgat1   | 0.248 |
| Rgcc     | 4.96317E-32 | 1.668162813 | 0.353 | 0.066 | 1.54121E-27 | KO | Rgcc     | 0.287 |
| Inpp5d   | 5.87554E-32 | 0.833498245 | 0.454 | 0.103 | 1.82453E-27 | KO | Inpp5d   | 0.351 |
| Trim35   | 6.05614E-32 | 0.735308566 | 0.441 | 0.097 | 1.88061E-27 | KO | Trim35   | 0.344 |
| Psme2    | 6.27876E-32 | 0.936428464 | 0.866 | 0.331 | 1.94974E-27 | KO | Psme2    | 0.535 |
| Pkp4     | 8.75392E-32 | 0.940161698 | 0.479 | 0.117 | 2.71836E-27 | KO | Pkp4     | 0.362 |
| Gch1     | 9.4608E-32  | 0.93555765  | 0.399 | 0.083 | 2.93786E-27 | KO | Gch1     | 0.316 |
| Scamp2   | 9.99607E-32 | 0.766154631 | 0.361 | 0.067 | 3.10408E-27 | KO | Scamp2   | 0.294 |
| Nap1l1   | 1.02228E-31 | 1.006727184 | 0.878 | 0.395 | 3.17448E-27 | KO | Nap1l1   | 0.483 |
| Hacd3    | 1.0824E-31  | 0.778030938 | 0.391 | 0.079 | 3.36119E-27 | KO | Hacd3    | 0.312 |
| Gm12840  | 1.2351E-31  | 2.803772138 | 0.218 | 0.021 | 3.83537E-27 | KO | Gm12840  | 0.197 |
| Wdr1     | 1.33784E-31 | 0.779938241 | 0.769 | 0.269 | 4.15439E-27 | KO | Wdr1     | 0.5   |
| Cep120   | 1.38885E-31 | 1.23206461  | 0.282 | 0.039 | 4.31281E-27 | KO | Cep120   | 0.243 |
| Cd38     | 1.4504E-31  | 1.401377974 | 0.235 | 0.025 | 4.50392E-27 | KO | Cd38     | 0.21  |
| Exoc2    | 1.56469E-31 | 0.718864322 | 0.324 | 0.054 | 4.85882E-27 | KO | Exoc2    | 0.27  |
| Fh1      | 1.71566E-31 | 1.024673559 | 0.395 | 0.083 | 5.32763E-27 | KO | Fh1      | 0.312 |
| AB124611 | 1.79103E-31 | 0.843181375 | 0.286 | 0.04  | 5.56169E-27 | KO | AB124611 | 0.246 |

|          |             |             |       |       |             |    |          |       |
|----------|-------------|-------------|-------|-------|-------------|----|----------|-------|
| Ptger4   | 1.88901E-31 | 1.329349073 | 0.269 | 0.036 | 5.86595E-27 | KO | Ptger4   | 0.233 |
| Cd200r4  | 1.94576E-31 | 1.887645257 | 0.181 | 0.011 | 6.04216E-27 | KO | Cd200r4  | 0.17  |
| Ppp2cb   | 2.19311E-31 | 1.854123558 | 0.248 | 0.03  | 6.81026E-27 | KO | Ppp2cb   | 0.218 |
| Nfya     | 2.26225E-31 | 1.877056566 | 0.21  | 0.018 | 7.02496E-27 | KO | Nfya     | 0.192 |
| Larp1b   | 2.36996E-31 | 1.478331885 | 0.315 | 0.052 | 7.35943E-27 | KO | Larp1b   | 0.263 |
| Lrch4    | 2.61358E-31 | 1.266130358 | 0.185 | 0.012 | 8.11596E-27 | KO | Lrch4    | 0.173 |
| Ncaph    | 2.61881E-31 | 1.382938873 | 0.29  | 0.043 | 8.1322E-27  | KO | Ncaph    | 0.247 |
| Coa6     | 2.72324E-31 | 0.885025152 | 0.29  | 0.042 | 8.45648E-27 | KO | Coa6     | 0.248 |
| Pdcd11   | 2.8313E-31  | 1.011732625 | 0.319 | 0.053 | 8.79205E-27 | KO | Pdcd11   | 0.266 |
| Nudt16l1 | 2.96952E-31 | 0.695997766 | 0.319 | 0.053 | 9.22126E-27 | KO | Nudt16l1 | 0.266 |
| Cdyl     | 3.11982E-31 | 1.779100102 | 0.227 | 0.023 | 9.68797E-27 | KO | Cdyl     | 0.204 |
| Rpl23a   | 3.13691E-31 | 0.841041562 | 0.962 | 0.661 | 9.74105E-27 | KO | Rpl23a   | 0.301 |
| Parp1    | 3.36636E-31 | 0.905833016 | 0.374 | 0.074 | 1.04535E-26 | KO | Parp1    | 0.3   |
| Rbms2    | 3.65243E-31 | 1.291625091 | 0.231 | 0.024 | 1.13419E-26 | KO | Rbms2    | 0.207 |
| Lclat1   | 3.66928E-31 | 1.028380839 | 0.286 | 0.041 | 1.13942E-26 | KO | Lclat1   | 0.245 |
| Hccs     | 3.81637E-31 | 0.877501348 | 0.416 | 0.09  | 1.1851E-26  | KO | Hccs     | 0.326 |
| Lonp2    | 4.03925E-31 | 0.804162576 | 0.303 | 0.047 | 1.25431E-26 | KO | Lonp2    | 0.256 |
| Lilr4b   | 4.27273E-31 | 0.827417153 | 0.424 | 0.093 | 1.32681E-26 | KO | Lilr4b   | 0.331 |
| Rab19    | 4.29102E-31 | 1.14114602  | 0.303 | 0.048 | 1.33249E-26 | KO | Rab19    | 0.255 |
| Mcur1    | 4.63722E-31 | 1.093268393 | 0.315 | 0.052 | 1.44E-26    | KO | Mcur1    | 0.263 |
| Tfe3     | 5.28109E-31 | 0.759417915 | 0.269 | 0.036 | 1.63994E-26 | KO | Tfe3     | 0.233 |
| Pum3     | 5.28357E-31 | 0.89000549  | 0.37  | 0.073 | 1.64071E-26 | KO | Pum3     | 0.297 |
| Adssl1   | 5.32497E-31 | 0.949619328 | 0.286 | 0.041 | 1.65356E-26 | KO | Adssl1   | 0.245 |
| Ywhab    | 5.54429E-31 | 0.75528872  | 0.739 | 0.258 | 1.72167E-26 | KO | Ywhab    | 0.481 |
| Prep     | 5.69075E-31 | 0.973948402 | 0.298 | 0.046 | 1.76715E-26 | KO | Prep     | 0.252 |
| Clec2d   | 5.72686E-31 | 0.69415891  | 0.63  | 0.189 | 1.77836E-26 | KO | Clec2d   | 0.441 |
| Pou2f2   | 6.05379E-31 | 2.83918814  | 0.193 | 0.014 | 1.87988E-26 | KO | Pou2f2   | 0.179 |
| Pglyrp2  | 7.36286E-31 | 1.289285938 | 0.223 | 0.022 | 2.28639E-26 | KO | Pglyrp2  | 0.201 |
| Samd1    | 7.51902E-31 | 1.509039297 | 0.265 | 0.036 | 2.33488E-26 | KO | Samd1    | 0.229 |
| Rab3ip   | 8.65564E-31 | 0.751961092 | 0.353 | 0.066 | 2.68783E-26 | KO | Rab3ip   | 0.287 |
| Dnaja2   | 8.85094E-31 | 0.695830741 | 0.63  | 0.187 | 2.74848E-26 | KO | Dnaja2   | 0.443 |
| Cbx3     | 9.51318E-31 | 0.908369085 | 0.815 | 0.325 | 2.95413E-26 | KO | Cbx3     | 0.49  |
| Prps1    | 9.88065E-31 | 0.77425146  | 0.357 | 0.068 | 3.06824E-26 | KO | Prps1    | 0.289 |
| Meaf6    | 9.8914E-31  | 1.202937603 | 0.353 | 0.067 | 3.07158E-26 | KO | Meaf6    | 0.286 |
| Galnt12  | 1.04107E-30 | 1.119781196 | 0.248 | 0.03  | 3.23283E-26 | KO | Galnt12  | 0.218 |
| Lpin2    | 1.14471E-30 | 0.991672389 | 0.34  | 0.062 | 3.55466E-26 | KO | Lpin2    | 0.278 |
| Jade2    | 1.17033E-30 | 1.138407319 | 0.336 | 0.062 | 3.63422E-26 | KO | Jade2    | 0.274 |
| Slc35e1  | 1.19098E-30 | 1.324037932 | 0.261 | 0.035 | 3.69834E-26 | KO | Slc35e1  | 0.226 |
| Stk26    | 1.19839E-30 | 1.044639604 | 0.34  | 0.062 | 3.72137E-26 | KO | Stk26    | 0.278 |
| Smc4     | 1.24415E-30 | 1.035861904 | 0.706 | 0.258 | 3.86346E-26 | KO | Smc4     | 0.448 |
| Mafg     | 1.28595E-30 | 0.809679163 | 0.324 | 0.056 | 3.99327E-26 | KO | Mafg     | 0.268 |
| Bccip    | 1.49978E-30 | 0.769689686 | 0.399 | 0.086 | 4.65728E-26 | KO | Bccip    | 0.313 |
| Arl1     | 1.53077E-30 | 0.726155082 | 0.538 | 0.147 | 4.7535E-26  | KO | Arl1     | 0.391 |
| Htatsf1  | 1.53671E-30 | 0.909029337 | 0.328 | 0.058 | 4.77196E-26 | KO | Htatsf1  | 0.27  |
| Gfod1    | 1.58919E-30 | 1.863292607 | 0.21  | 0.019 | 4.93492E-26 | KO | Gfod1    | 0.191 |
| Cmtm7    | 1.72124E-30 | 0.926272823 | 0.744 | 0.269 | 5.34496E-26 | KO | Cmtm7    | 0.475 |
| Cul2     | 1.73553E-30 | 0.945003961 | 0.324 | 0.057 | 5.38933E-26 | KO | Cul2     | 0.267 |
| Hspa8    | 1.85191E-30 | 0.74410049  | 0.966 | 0.784 | 5.75074E-26 | KO | Hspa8    | 0.182 |
| Cxcr4    | 1.92246E-30 | 0.862040702 | 0.424 | 0.098 | 5.9698E-26  | KO | Cxcr4    | 0.326 |
| Arnt2    | 1.99014E-30 | 2.265472973 | 0.164 | 0.008 | 6.18E-26    | KO | Arnt2    | 0.156 |
| Suco     | 2.00338E-30 | 0.712760596 | 0.408 | 0.088 | 6.2211E-26  | KO | Suco     | 0.32  |

|              |             |             |       |       |             |    |              |       |
|--------------|-------------|-------------|-------|-------|-------------|----|--------------|-------|
| Cdt1         | 2.10784E-30 | 0.773083501 | 0.378 | 0.077 | 6.54546E-26 | KO | Cdt1         | 0.301 |
| Gm45902      | 2.17838E-30 | 1.668190697 | 0.181 | 0.012 | 6.76452E-26 | KO | Gm45902      | 0.169 |
| Msh2         | 2.18739E-30 | 0.788244811 | 0.345 | 0.063 | 6.79251E-26 | KO | Msh2         | 0.282 |
| Mfsd6        | 2.3859E-30  | 1.412112873 | 0.311 | 0.053 | 7.40893E-26 | KO | Mfsd6        | 0.258 |
| Srsf6        | 2.53252E-30 | 0.766565064 | 0.668 | 0.208 | 7.86422E-26 | KO | Srsf6        | 0.46  |
| Erg28        | 2.59192E-30 | 0.713686525 | 0.471 | 0.115 | 8.04869E-26 | KO | Erg28        | 0.356 |
| Cfap43       | 2.63975E-30 | 1.500251729 | 0.21  | 0.019 | 8.19723E-26 | KO | Cfap43       | 0.191 |
| Kif13b       | 2.8633E-30  | 0.82791764  | 0.332 | 0.06  | 8.89141E-26 | KO | Kif13b       | 0.272 |
| Itpr3        | 3.17292E-30 | 0.786906264 | 0.261 | 0.035 | 9.85287E-26 | KO | Itpr3        | 0.226 |
| Nfe2l1       | 3.21611E-30 | 0.694503503 | 0.307 | 0.05  | 9.98699E-26 | KO | Nfe2l1       | 0.257 |
| Tap1         | 3.40537E-30 | 0.821119029 | 0.84  | 0.338 | 1.05747E-25 | KO | Tap1         | 0.502 |
| Coq10b       | 3.44921E-30 | 0.78467554  | 0.441 | 0.104 | 1.07108E-25 | KO | Coq10b       | 0.337 |
| Hsd17b7      | 3.60151E-30 | 1.671847223 | 0.218 | 0.022 | 1.11838E-25 | KO | Hsd17b7      | 0.196 |
| Pstk         | 3.66589E-30 | 1.167422131 | 0.265 | 0.037 | 1.13837E-25 | KO | Pstk         | 0.228 |
| Slfn2        | 3.69125E-30 | 0.907247724 | 0.458 | 0.113 | 1.14624E-25 | KO | Slfn2        | 0.345 |
| Wnk1         | 3.85802E-30 | 0.871835678 | 0.92  | 0.414 | 1.19803E-25 | KO | Wnk1         | 0.506 |
| Tpm3         | 3.93261E-30 | 0.897194622 | 0.866 | 0.388 | 1.22119E-25 | KO | Tpm3         | 0.478 |
| Rgs8         | 4.62769E-30 | 1.642561207 | 0.252 | 0.033 | 1.43704E-25 | KO | Rgs8         | 0.219 |
| Mon2         | 4.70038E-30 | 0.78177405  | 0.315 | 0.054 | 1.45961E-25 | KO | Mon2         | 0.261 |
| Soat1        | 4.73249E-30 | 0.697982342 | 0.303 | 0.049 | 1.46958E-25 | KO | Soat1        | 0.254 |
| Sub1         | 4.7712E-30  | 0.97250972  | 0.937 | 0.545 | 1.4816E-25  | KO | Sub1         | 0.392 |
| Slc25a24     | 4.81871E-30 | 0.860258706 | 0.231 | 0.026 | 1.49635E-25 | KO | Slc25a24     | 0.205 |
| Slc17a6      | 4.90214E-30 | 3.653582646 | 0.176 | 0.012 | 1.52226E-25 | KO | Slc17a6      | 0.164 |
| Cfl1         | 5.19535E-30 | 0.807376403 | 0.958 | 0.656 | 1.61331E-25 | KO | Cfl1         | 0.302 |
| Atp6v1c1     | 5.40458E-30 | 0.83298335  | 0.349 | 0.066 | 1.67828E-25 | KO | Atp6v1c1     | 0.283 |
| Gtf3c1       | 5.46553E-30 | 0.736902126 | 0.303 | 0.049 | 1.69721E-25 | KO | Gtf3c1       | 0.254 |
| Slbp         | 5.57023E-30 | 0.778801197 | 0.605 | 0.184 | 1.72972E-25 | KO | Slbp         | 0.421 |
| Bcl2l1       | 6.35588E-30 | 0.981561185 | 0.424 | 0.1   | 1.97369E-25 | KO | Bcl2l1       | 0.324 |
| Mcm5         | 6.79581E-30 | 1.052217557 | 0.508 | 0.143 | 2.1103E-25  | KO | Mcm5         | 0.365 |
| Lrch1        | 6.92481E-30 | 1.058684706 | 0.332 | 0.061 | 2.15036E-25 | KO | Lrch1        | 0.271 |
| St3gal4      | 7.04974E-30 | 1.063627284 | 0.282 | 0.042 | 2.18915E-25 | KO | St3gal4      | 0.24  |
| Gm28875      | 7.57176E-30 | 1.01649557  | 0.265 | 0.037 | 2.35126E-25 | KO | Gm28875      | 0.228 |
| Tbc1d5       | 7.93216E-30 | 1.077202736 | 0.214 | 0.021 | 2.46317E-25 | KO | Tbc1d5       | 0.193 |
| Atg101       | 7.99133E-30 | 0.69843037  | 0.361 | 0.071 | 2.48155E-25 | KO | Atg101       | 0.29  |
| Ppm1m        | 8.29444E-30 | 1.416528952 | 0.227 | 0.025 | 2.57567E-25 | KO | Ppm1m        | 0.202 |
| Ppa1         | 8.29591E-30 | 0.765770223 | 0.504 | 0.133 | 2.57613E-25 | KO | Ppa1         | 0.371 |
| Zfp142       | 8.9644E-30  | 0.985969049 | 0.265 | 0.037 | 2.78371E-25 | KO | Zfp142       | 0.228 |
| Gm45716      | 9.14429E-30 | 0.799720764 | 0.504 | 0.135 | 2.83958E-25 | KO | Gm45716      | 0.369 |
| Hsp90ab1     | 9.71622E-30 | 0.768362819 | 0.966 | 0.734 | 3.01718E-25 | KO | Hsp90ab1     | 0.232 |
| Trap1        | 1.01823E-29 | 0.729496431 | 0.361 | 0.072 | 3.16192E-25 | KO | Trap1        | 0.289 |
| Nlk          | 1.04955E-29 | 0.983014707 | 0.239 | 0.029 | 3.25916E-25 | KO | Nlk          | 0.21  |
| Nsd2         | 1.0982E-29  | 0.754298446 | 0.571 | 0.171 | 3.41023E-25 | KO | Nsd2         | 0.4   |
| 2410002F23Ri | 1.15628E-29 | 0.802602204 | 0.286 | 0.044 | 3.5906E-25  | KO | 2410002F23Ri | 0.242 |
| Mkrn2        | 1.20073E-29 | 1.45139128  | 0.273 | 0.04  | 3.72862E-25 | KO | Mkrn2        | 0.233 |
| Nol7         | 1.22192E-29 | 0.84707379  | 0.836 | 0.339 | 3.79442E-25 | KO | Nol7         | 0.497 |
| Ahi1         | 1.28541E-29 | 0.831007707 | 0.277 | 0.041 | 3.99157E-25 | KO | Ahi1         | 0.236 |
| Eef1akmt2    | 1.36641E-29 | 1.174673406 | 0.273 | 0.04  | 4.24311E-25 | KO | Eef1akmt2    | 0.233 |
| Snd1         | 1.5027E-29  | 0.7604684   | 0.387 | 0.083 | 4.66633E-25 | KO | Snd1         | 0.304 |
| N4bp1        | 1.50986E-29 | 1.116921633 | 0.382 | 0.082 | 4.68858E-25 | KO | N4bp1        | 0.3   |
| Ints3        | 1.59582E-29 | 1.779900568 | 0.218 | 0.023 | 4.95551E-25 | KO | Ints3        | 0.195 |
| Chn2         | 1.66369E-29 | 2.353376627 | 0.16  | 0.008 | 5.16624E-25 | KO | Chn2         | 0.152 |

|             |             |             |       |       |             |    |             |       |
|-------------|-------------|-------------|-------|-------|-------------|----|-------------|-------|
| Cntln       | 1.73127E-29 | 1.784951208 | 0.168 | 0.01  | 5.37612E-25 | KO | Cntln       | 0.158 |
| Cytip       | 1.85057E-29 | 0.859973706 | 0.845 | 0.35  | 5.74656E-25 | KO | Cytip       | 0.495 |
| Mrps6       | 1.90661E-29 | 0.763158468 | 0.378 | 0.081 | 5.92061E-25 | KO | Mrps6       | 0.297 |
| Tex2        | 1.94723E-29 | 0.784121768 | 0.256 | 0.035 | 6.04673E-25 | KO | Tex2        | 0.221 |
| Map3k7      | 1.95386E-29 | 0.923949563 | 0.319 | 0.057 | 6.06733E-25 | KO | Map3k7      | 0.262 |
| Cd82        | 1.96692E-29 | 0.796494189 | 0.777 | 0.289 | 6.10789E-25 | KO | Cd82        | 0.488 |
| Dek         | 2.16796E-29 | 0.95693231  | 0.773 | 0.304 | 6.73217E-25 | KO | Dek         | 0.469 |
| Pola1       | 2.19365E-29 | 0.96568239  | 0.286 | 0.045 | 6.81194E-25 | KO | Pola1       | 0.241 |
| Abrac1      | 2.30954E-29 | 0.857201078 | 0.908 | 0.407 | 7.17182E-25 | KO | Abrac1      | 0.501 |
| Pcyt1a      | 2.37247E-29 | 0.943289656 | 0.366 | 0.075 | 7.36724E-25 | KO | Pcyt1a      | 0.291 |
| Tbc1d20     | 2.42205E-29 | 0.835834834 | 0.307 | 0.052 | 7.52119E-25 | KO | Tbc1d20     | 0.255 |
| Ubfd1       | 2.69152E-29 | 1.180642224 | 0.261 | 0.037 | 8.35799E-25 | KO | Ubfd1       | 0.224 |
| Crkl        | 2.81072E-29 | 0.820365082 | 0.307 | 0.053 | 8.72813E-25 | KO | Crkl        | 0.254 |
| Brcc3       | 2.82681E-29 | 0.969478187 | 0.361 | 0.073 | 8.77809E-25 | KO | Brcc3       | 0.288 |
| Zbp1        | 2.87828E-29 | 0.713391514 | 0.357 | 0.071 | 8.93792E-25 | KO | Zbp1        | 0.286 |
| Prr12       | 3.18286E-29 | 1.933702289 | 0.214 | 0.022 | 9.88373E-25 | KO | Prr12       | 0.192 |
| Dclre1c     | 3.3244E-29  | 1.165663472 | 0.214 | 0.022 | 1.03233E-24 | KO | Dclre1c     | 0.192 |
| Ciao1       | 3.35632E-29 | 1.378487719 | 0.248 | 0.033 | 1.04224E-24 | KO | Ciao1       | 0.215 |
| Kpna2       | 3.45904E-29 | 1.674817969 | 0.223 | 0.025 | 1.07414E-24 | KO | Kpna2       | 0.198 |
| Ttll12      | 4.04313E-29 | 0.832666791 | 0.252 | 0.034 | 1.25551E-24 | KO | Ttll12      | 0.218 |
| Spata5      | 4.12887E-29 | 1.151277    | 0.227 | 0.026 | 1.28214E-24 | KO | Spata5      | 0.201 |
| Llgl1       | 4.20083E-29 | 1.772862596 | 0.21  | 0.021 | 1.30448E-24 | KO | Llgl1       | 0.189 |
| Xdh         | 4.55349E-29 | 1.067351942 | 0.277 | 0.042 | 1.414E-24   | KO | Xdh         | 0.235 |
| Tmem181a    | 4.58118E-29 | 0.770083341 | 0.286 | 0.045 | 1.42259E-24 | KO | Tmem181a    | 0.241 |
| Tbc1d9b     | 4.60517E-29 | 0.918893671 | 0.277 | 0.042 | 1.43004E-24 | KO | Tbc1d9b     | 0.235 |
| Rrm1        | 5.19174E-29 | 1.012135204 | 0.513 | 0.148 | 1.61219E-24 | KO | Rrm1        | 0.365 |
| Sreb1       | 5.30074E-29 | 0.742032258 | 0.286 | 0.045 | 1.64604E-24 | KO | Sreb1       | 0.241 |
| Ctnna1      | 5.72831E-29 | 0.974188205 | 0.261 | 0.037 | 1.77881E-24 | KO | Ctnna1      | 0.224 |
| Umps        | 5.81995E-29 | 1.097964472 | 0.273 | 0.041 | 1.80727E-24 | KO | Umps        | 0.232 |
| Brd8        | 5.96038E-29 | 0.750890485 | 0.424 | 0.1   | 1.85088E-24 | KO | Brd8        | 0.324 |
| Eif3a       | 6.7922E-29  | 0.753983009 | 0.828 | 0.317 | 2.10918E-24 | KO | Eif3a       | 0.511 |
| 5430416N02R | 7.0197E-29  | 1.044547007 | 0.29  | 0.048 | 2.17983E-24 | KO | 5430416N02R | 0.242 |
| Ccnc        | 7.53651E-29 | 1.091649847 | 0.252 | 0.035 | 2.34031E-24 | KO | Ccnc        | 0.217 |
| Cdk4        | 7.63434E-29 | 0.756658176 | 0.55  | 0.164 | 2.37069E-24 | KO | Cdk4        | 0.386 |
| Arrdc3      | 7.83377E-29 | 0.891715658 | 0.248 | 0.033 | 2.43262E-24 | KO | Arrdc3      | 0.215 |
| Armc7       | 8.25348E-29 | 0.866649984 | 0.273 | 0.041 | 2.56295E-24 | KO | Armc7       | 0.232 |
| Ly9         | 8.9013E-29  | 1.004298364 | 0.231 | 0.028 | 2.76412E-24 | KO | Ly9         | 0.203 |
| Nipal3      | 9.94212E-29 | 1.47078684  | 0.206 | 0.02  | 3.08733E-24 | KO | Nipal3      | 0.186 |
| Nat10       | 1.00051E-28 | 1.366430077 | 0.231 | 0.028 | 3.1069E-24  | KO | Nat10       | 0.203 |
| Nfkbie      | 1.05337E-28 | 0.779312934 | 0.332 | 0.062 | 3.27103E-24 | KO | Nfkbie      | 0.27  |
| Gpr160      | 1.13419E-28 | 1.392605243 | 0.214 | 0.023 | 3.522E-24   | KO | Gpr160      | 0.191 |
| Anp32e      | 1.14946E-28 | 0.821199219 | 0.697 | 0.243 | 3.56942E-24 | KO | Anp32e      | 0.454 |
| Gse1        | 1.16249E-28 | 1.46293777  | 0.261 | 0.038 | 3.60989E-24 | KO | Gse1        | 0.223 |
| Vcpkmt      | 1.18203E-28 | 0.958754897 | 0.277 | 0.043 | 3.67057E-24 | KO | Vcpkmt      | 0.234 |
| Lactb2      | 1.19623E-28 | 1.094853872 | 0.218 | 0.024 | 3.71465E-24 | KO | Lactb2      | 0.194 |
| Ak3         | 1.3244E-28  | 0.835248804 | 0.261 | 0.038 | 4.11267E-24 | KO | Ak3         | 0.223 |
| Med11       | 1.65947E-28 | 0.864688763 | 0.345 | 0.068 | 5.15315E-24 | KO | Med11       | 0.277 |
| Aifm1       | 1.6793E-28  | 1.2059449   | 0.248 | 0.034 | 5.21473E-24 | KO | Aifm1       | 0.214 |
| Tdg         | 1.78257E-28 | 0.761451462 | 0.399 | 0.091 | 5.53542E-24 | KO | Tdg         | 0.308 |
| Tma7        | 1.81144E-28 | 0.863916459 | 0.912 | 0.443 | 5.62507E-24 | KO | Tma7        | 0.469 |
| Atl2        | 2.05206E-28 | 0.70787811  | 0.239 | 0.031 | 6.37225E-24 | KO | Atl2        | 0.208 |

|             |             |             |       |       |             |    |             |       |
|-------------|-------------|-------------|-------|-------|-------------|----|-------------|-------|
| Bsdc1       | 2.05424E-28 | 1.627364441 | 0.252 | 0.036 | 6.37903E-24 | KO | Bsdc1       | 0.216 |
| Zdhhc8      | 2.06251E-28 | 0.760659541 | 0.214 | 0.023 | 6.40471E-24 | KO | Zdhhc8      | 0.191 |
| Gnptab      | 2.13159E-28 | 0.823678411 | 0.29  | 0.048 | 6.61922E-24 | KO | Gnptab      | 0.242 |
| Dhx29       | 2.26929E-28 | 1.290153207 | 0.21  | 0.022 | 7.04683E-24 | KO | Dhx29       | 0.188 |
| Nelfa       | 2.26973E-28 | 0.88303777  | 0.256 | 0.037 | 7.04819E-24 | KO | Nelfa       | 0.219 |
| Cdkn2aip    | 2.66258E-28 | 0.778765356 | 0.273 | 0.042 | 8.26812E-24 | KO | Cdkn2aip    | 0.231 |
| Pip4k2b     | 2.73808E-28 | 0.737383732 | 0.303 | 0.053 | 8.50255E-24 | KO | Pip4k2b     | 0.25  |
| Pola2       | 2.77061E-28 | 0.778409693 | 0.29  | 0.048 | 8.60358E-24 | KO | Pola2       | 0.242 |
| Ptprs       | 3.12665E-28 | 0.895263701 | 0.529 | 0.154 | 9.70918E-24 | KO | Ptprs       | 0.375 |
| Rab3gap2    | 3.17223E-28 | 1.036005347 | 0.223 | 0.026 | 9.85073E-24 | KO | Rab3gap2    | 0.197 |
| Atf6b       | 3.53798E-28 | 0.89756801  | 0.261 | 0.038 | 1.09865E-23 | KO | Atf6b       | 0.223 |
| Ebpl        | 3.54175E-28 | 0.860561232 | 0.34  | 0.067 | 1.09982E-23 | KO | Ebpl        | 0.273 |
| Rwdd1       | 3.62853E-28 | 0.715989939 | 0.769 | 0.288 | 1.12677E-23 | KO | Rwdd1       | 0.481 |
| Mfap3       | 4.36231E-28 | 1.655042693 | 0.202 | 0.02  | 1.35463E-23 | KO | Mfap3       | 0.182 |
| Hells       | 4.3668E-28  | 1.014297759 | 0.412 | 0.101 | 1.35602E-23 | KO | Hells       | 0.311 |
| Fam168a     | 4.38599E-28 | 0.994788197 | 0.231 | 0.029 | 1.36198E-23 | KO | Fam168a     | 0.202 |
| Hmgxb4      | 4.46877E-28 | 1.764854392 | 0.181 | 0.014 | 1.38769E-23 | KO | Hmgxb4      | 0.167 |
| Mybbp1a     | 5.02166E-28 | 0.811968033 | 0.45  | 0.114 | 1.55937E-23 | KO | Mybbp1a     | 0.336 |
| Gsdmd       | 5.13504E-28 | 0.696134838 | 0.307 | 0.055 | 1.59458E-23 | KO | Gsdmd       | 0.252 |
| Odc1        | 6.08962E-28 | 0.80279384  | 0.878 | 0.398 | 1.89101E-23 | KO | Odc1        | 0.48  |
| Dusp6       | 6.71541E-28 | 1.242374903 | 0.277 | 0.045 | 2.08534E-23 | KO | Dusp6       | 0.232 |
| Tmem106c    | 6.90892E-28 | 1.301358212 | 0.181 | 0.014 | 2.14543E-23 | KO | Tmem106c    | 0.167 |
| Srd5a3      | 8.27416E-28 | 1.084285389 | 0.214 | 0.024 | 2.56937E-23 | KO | Srd5a3      | 0.19  |
| Gbp6        | 8.31795E-28 | 1.299004453 | 0.176 | 0.013 | 2.58297E-23 | KO | Gbp6        | 0.163 |
| Siah2       | 8.76813E-28 | 0.774943288 | 0.273 | 0.043 | 2.72277E-23 | KO | Siah2       | 0.23  |
| Fen1        | 9.48118E-28 | 0.72210647  | 0.378 | 0.085 | 2.94419E-23 | KO | Fen1        | 0.293 |
| Gbf1        | 9.73964E-28 | 0.906787429 | 0.282 | 0.046 | 3.02445E-23 | KO | Gbf1        | 0.236 |
| Usp1        | 1.06583E-27 | 0.7944149   | 0.454 | 0.117 | 3.30972E-23 | KO | Usp1        | 0.337 |
| Edaradd     | 1.11372E-27 | 2.277525868 | 0.143 | 0.006 | 3.45845E-23 | KO | Edaradd     | 0.137 |
| Dlat        | 1.1325E-27  | 0.779765386 | 0.277 | 0.045 | 3.51677E-23 | KO | Dlat        | 0.232 |
| Trmt10a     | 1.24226E-27 | 1.937647479 | 0.16  | 0.01  | 3.8576E-23  | KO | Trmt10a     | 0.15  |
| Gtf2h1      | 1.41332E-27 | 1.103348765 | 0.286 | 0.049 | 4.38879E-23 | KO | Gtf2h1      | 0.237 |
| Rad51       | 1.43616E-27 | 1.191766332 | 0.311 | 0.059 | 4.45972E-23 | KO | Rad51       | 0.252 |
| Stk17b      | 1.50428E-27 | 0.837861805 | 0.874 | 0.379 | 4.67123E-23 | KO | Stk17b      | 0.495 |
| Ccr8        | 1.50914E-27 | 1.85583318  | 0.16  | 0.01  | 4.68633E-23 | KO | Ccr8        | 0.15  |
| Zfp664      | 1.59598E-27 | 1.220282451 | 0.261 | 0.039 | 4.956E-23   | KO | Zfp664      | 0.222 |
| Arl8a       | 1.68602E-27 | 1.035316689 | 0.248 | 0.036 | 5.23561E-23 | KO | Arl8a       | 0.212 |
| Laptm5      | 1.81335E-27 | 0.790915846 | 0.962 | 0.586 | 5.63099E-23 | KO | Laptm5      | 0.376 |
| Zfp655      | 1.81655E-27 | 0.77049015  | 0.252 | 0.037 | 5.64093E-23 | KO | Zfp655      | 0.215 |
| Gnai2       | 1.82018E-27 | 0.792255908 | 0.924 | 0.491 | 5.65222E-23 | KO | Gnai2       | 0.433 |
| Dnajc14     | 1.8892E-27  | 0.721854136 | 0.277 | 0.045 | 5.86654E-23 | KO | Dnajc14     | 0.232 |
| Mrps28      | 2.05103E-27 | 0.726668305 | 0.349 | 0.073 | 6.36906E-23 | KO | Mrps28      | 0.276 |
| Cdc42       | 2.15062E-27 | 0.802013987 | 0.933 | 0.465 | 6.67831E-23 | KO | Cdc42       | 0.468 |
| Cox18       | 2.15199E-27 | 1.012905154 | 0.273 | 0.044 | 6.68256E-23 | KO | Cox18       | 0.229 |
| Fbxo9       | 2.25568E-27 | 0.715808179 | 0.277 | 0.045 | 7.00457E-23 | KO | Fbxo9       | 0.232 |
| 1810030007R | 2.3365E-27  | 0.776827925 | 0.248 | 0.036 | 7.25554E-23 | KO | 1810030007R | 0.212 |
| Cit         | 2.44328E-27 | 0.881545588 | 0.315 | 0.061 | 7.58711E-23 | KO | Cit         | 0.254 |
| Hprt        | 2.47232E-27 | 0.707074796 | 0.731 | 0.256 | 7.67728E-23 | KO | Hprt        | 0.475 |
| Isg20l2     | 2.56581E-27 | 1.141578511 | 0.277 | 0.046 | 7.9676E-23  | KO | Isg20l2     | 0.231 |
| Cyfi1       | 2.65558E-27 | 1.154971204 | 0.277 | 0.046 | 8.24636E-23 | KO | Cyfi1       | 0.231 |
| Hmgn2       | 2.79182E-27 | 1.129901079 | 0.605 | 0.219 | 8.66944E-23 | KO | Hmgn2       | 0.386 |



|            |             |             |       |       |             |    |            |       |
|------------|-------------|-------------|-------|-------|-------------|----|------------|-------|
| Sec11c     | 2.83538E-27 | 0.867857847 | 0.84  | 0.359 | 8.8047E-23  | KO | Sec11c     | 0.481 |
| Tnfrsf18   | 3.08019E-27 | 0.832879699 | 0.866 | 0.39  | 9.56493E-23 | KO | Tnfrsf18   | 0.476 |
| Qdpr       | 3.2913E-27  | 0.699467217 | 0.395 | 0.091 | 1.02205E-22 | KO | Qdpr       | 0.304 |
| Ubqln1     | 3.35766E-27 | 0.756289563 | 0.37  | 0.084 | 1.04265E-22 | KO | Ubqln1     | 0.286 |
| Gripap1    | 3.4945E-27  | 0.715520849 | 0.227 | 0.029 | 1.08515E-22 | KO | Gripap1    | 0.198 |
| Ubash3a    | 3.55649E-27 | 1.14615996  | 0.311 | 0.06  | 1.1044E-22  | KO | Ubash3a    | 0.251 |
| Atxn7l1    | 3.59876E-27 | 0.846048335 | 0.324 | 0.063 | 1.11752E-22 | KO | Atxn7l1    | 0.261 |
| Zbtb44     | 3.66627E-27 | 1.086055447 | 0.311 | 0.059 | 1.13849E-22 | KO | Zbtb44     | 0.252 |
| Lgals3     | 4.21636E-27 | 1.004692074 | 0.794 | 0.332 | 1.30931E-22 | KO | Lgals3     | 0.462 |
| Diaph3     | 4.42948E-27 | 0.855470905 | 0.29  | 0.051 | 1.37549E-22 | KO | Diaph3     | 0.239 |
| Bcl3       | 4.43669E-27 | 1.425195686 | 0.239 | 0.034 | 1.37773E-22 | KO | Bcl3       | 0.205 |
| Ptprc      | 4.80207E-27 | 0.876569824 | 0.966 | 0.619 | 1.49119E-22 | KO | Ptprc      | 0.347 |
| AC160336.1 | 4.94702E-27 | 0.794300193 | 0.504 | 0.151 | 1.5362E-22  | KO | AC160336.1 | 0.353 |
| Gnpda2     | 4.97135E-27 | 0.756749756 | 0.303 | 0.057 | 1.54375E-22 | KO | Gnpda2     | 0.246 |
| Hira       | 5.09185E-27 | 0.821553102 | 0.282 | 0.048 | 1.58117E-22 | KO | Hira       | 0.234 |
| Hsf1       | 5.13563E-27 | 1.191127463 | 0.239 | 0.034 | 1.59477E-22 | KO | Hsf1       | 0.205 |
| Rbl1       | 5.17808E-27 | 0.974944093 | 0.311 | 0.06  | 1.60795E-22 | KO | Rbl1       | 0.251 |
| Cept1      | 5.50001E-27 | 0.935488368 | 0.294 | 0.053 | 1.70792E-22 | KO | Cept1      | 0.241 |
| Sf3a3      | 5.56827E-27 | 0.874342802 | 0.399 | 0.095 | 1.72912E-22 | KO | Sf3a3      | 0.304 |
| Bach2      | 5.59927E-27 | 2.052039858 | 0.168 | 0.013 | 1.73874E-22 | KO | Bach2      | 0.155 |
| Ptprcap    | 6.25315E-27 | 0.736301613 | 0.903 | 0.424 | 1.94179E-22 | KO | Ptprcap    | 0.479 |
| Sart3      | 6.26886E-27 | 0.986352737 | 0.298 | 0.055 | 1.94667E-22 | KO | Sart3      | 0.243 |
| Adcy3      | 6.85209E-27 | 1.386813165 | 0.206 | 0.023 | 2.12778E-22 | KO | Adcy3      | 0.183 |
| Cwc25      | 6.91815E-27 | 0.853841862 | 0.286 | 0.05  | 2.14829E-22 | KO | Cwc25      | 0.236 |
| Zfp62      | 7.4605E-27  | 1.145984446 | 0.256 | 0.039 | 2.31671E-22 | KO | Zfp62      | 0.217 |
| Cad        | 7.50052E-27 | 0.707600434 | 0.311 | 0.06  | 2.32914E-22 | KO | Cad        | 0.251 |
| Mapkap1    | 7.51372E-27 | 0.824603468 | 0.248 | 0.037 | 2.33324E-22 | KO | Mapkap1    | 0.211 |
| Heatr1     | 7.60044E-27 | 1.154854888 | 0.227 | 0.03  | 2.36017E-22 | KO | Heatr1     | 0.197 |
| Atl3       | 7.99412E-27 | 1.173962026 | 0.332 | 0.068 | 2.48241E-22 | KO | Atl3       | 0.264 |
| Hnrnph3    | 8.30412E-27 | 0.725668879 | 0.353 | 0.077 | 2.57868E-22 | KO | Hnrnph3    | 0.276 |
| Ndr3       | 8.88024E-27 | 0.738787543 | 0.286 | 0.05  | 2.75758E-22 | KO | Ndr3       | 0.236 |
| Gabpb1     | 9.81123E-27 | 0.728702973 | 0.336 | 0.07  | 3.04668E-22 | KO | Gabpb1     | 0.266 |
| Spry1      | 1.09198E-26 | 1.586786191 | 0.185 | 0.017 | 3.39093E-22 | KO | Spry1      | 0.168 |
| Id2        | 1.24563E-26 | 0.83603225  | 0.924 | 0.494 | 3.86805E-22 | KO | Id2        | 0.43  |
| Hmces      | 1.27119E-26 | 1.20548577  | 0.256 | 0.04  | 3.94742E-22 | KO | Hmces      | 0.216 |
| Bspry      | 1.35467E-26 | 1.185970137 | 0.273 | 0.046 | 4.20666E-22 | KO | Bspry      | 0.227 |
| Vsir       | 1.40958E-26 | 0.785270177 | 0.315 | 0.062 | 4.37716E-22 | KO | Vsir       | 0.253 |
| Rnf31      | 1.4486E-26  | 0.712129584 | 0.214 | 0.026 | 4.49834E-22 | KO | Rnf31      | 0.188 |
| Arl6ip1    | 1.56825E-26 | 0.864798567 | 0.899 | 0.423 | 4.86989E-22 | KO | Arl6ip1    | 0.476 |
| Actr3      | 1.59944E-26 | 0.82455933  | 0.912 | 0.459 | 4.96674E-22 | KO | Actr3      | 0.453 |
| Etaa1      | 1.7708E-26  | 0.72101115  | 0.202 | 0.022 | 5.49887E-22 | KO | Etaa1      | 0.18  |
| Nsf        | 1.77721E-26 | 0.964293493 | 0.307 | 0.06  | 5.51878E-22 | KO | Nsf        | 0.247 |
| Nrgn       | 1.84727E-26 | 1.537382945 | 0.668 | 0.288 | 5.73631E-22 | KO | Nrgn       | 0.38  |
| Aldh18a1   | 1.86033E-26 | 0.978385962 | 0.239 | 0.035 | 5.77689E-22 | KO | Aldh18a1   | 0.204 |
| Fkbp2      | 2.05246E-26 | 0.693674887 | 0.555 | 0.169 | 6.3735E-22  | KO | Fkbp2      | 0.386 |
| Hnrnpa3    | 2.12896E-26 | 0.862268145 | 0.887 | 0.449 | 6.61106E-22 | KO | Hnrnpa3    | 0.438 |
| Mdh2       | 2.15791E-26 | 0.701835492 | 0.853 | 0.338 | 6.70096E-22 | KO | Mdh2       | 0.515 |
| Ctps2      | 2.33342E-26 | 0.730314465 | 0.248 | 0.038 | 7.24596E-22 | KO | Ctps2      | 0.21  |
| Asf1b      | 2.5294E-26  | 1.482249496 | 0.294 | 0.056 | 7.85454E-22 | KO | Asf1b      | 0.238 |
| Cntrob     | 2.65325E-26 | 2.530249265 | 0.118 | 0.002 | 8.23913E-22 | KO | Cntrob     | 0.116 |
| Ncf1       | 2.73146E-26 | 2.044509123 | 0.189 | 0.019 | 8.48199E-22 | KO | Ncf1       | 0.17  |

|               |             |             |       |       |             |    |               |       |
|---------------|-------------|-------------|-------|-------|-------------|----|---------------|-------|
| Lamc1         | 2.84632E-26 | 0.973647133 | 0.311 | 0.062 | 8.83867E-22 | KO | Lamc1         | 0.249 |
| Tbc1d22b      | 2.84939E-26 | 1.334588572 | 0.227 | 0.031 | 8.84822E-22 | KO | Tbc1d22b      | 0.196 |
| Tmem109       | 2.95737E-26 | 0.71113714  | 0.412 | 0.103 | 9.18353E-22 | KO | Tmem109       | 0.309 |
| Taf4          | 2.96111E-26 | 1.007078494 | 0.193 | 0.02  | 9.19514E-22 | KO | Taf4          | 0.173 |
| Dcaf1         | 3.00851E-26 | 0.857127231 | 0.269 | 0.045 | 9.34234E-22 | KO | Dcaf1         | 0.224 |
| Psmd5         | 3.72176E-26 | 0.954186435 | 0.235 | 0.034 | 1.15572E-21 | KO | Psmd5         | 0.201 |
| Ccdc43        | 3.88394E-26 | 1.324797015 | 0.248 | 0.038 | 1.20608E-21 | KO | Ccdc43        | 0.21  |
| Itfg1         | 3.94144E-26 | 0.730380392 | 0.328 | 0.068 | 1.22393E-21 | KO | Itfg1         | 0.26  |
| Jpt2          | 4.21147E-26 | 1.268109228 | 0.214 | 0.027 | 1.30779E-21 | KO | Jpt2          | 0.187 |
| Cd80          | 4.27002E-26 | 0.944258762 | 0.227 | 0.031 | 1.32597E-21 | KO | Cd80          | 0.196 |
| Diablo        | 4.5982E-26  | 0.725122021 | 0.227 | 0.031 | 1.42788E-21 | KO | Diablo        | 0.196 |
| Lgalsl        | 4.90329E-26 | 1.300847247 | 0.185 | 0.018 | 1.52262E-21 | KO | Lgalsl        | 0.167 |
| O610030E20Ri  | 5.55194E-26 | 0.70613065  | 0.273 | 0.047 | 1.72404E-21 | KO | O610030E20Ri  | 0.226 |
| Extl3         | 5.83802E-26 | 0.886708183 | 0.273 | 0.047 | 1.81288E-21 | KO | Extl3         | 0.226 |
| Patl1         | 6.43269E-26 | 1.060280445 | 0.223 | 0.03  | 1.99754E-21 | KO | Patl1         | 0.193 |
| Gpm6b         | 6.97244E-26 | 1.037513061 | 0.269 | 0.046 | 2.16515E-21 | KO | Gpm6b         | 0.223 |
| Rbm10         | 8.04237E-26 | 0.720251914 | 0.277 | 0.049 | 2.4974E-21  | KO | Rbm10         | 0.228 |
| Il12rb1       | 8.14204E-26 | 0.91121311  | 0.223 | 0.03  | 2.52835E-21 | KO | Il12rb1       | 0.193 |
| Rwdd4a        | 8.38361E-26 | 0.812143915 | 0.294 | 0.056 | 2.60336E-21 | KO | Rwdd4a        | 0.238 |
| Kif18b        | 8.58031E-26 | 2.238577646 | 0.143 | 0.008 | 2.66444E-21 | KO | Kif18b        | 0.135 |
| Kcnq1ot1      | 8.62926E-26 | 0.792940191 | 0.361 | 0.084 | 2.67964E-21 | KO | Kcnq1ot1      | 0.277 |
| Prkaca        | 9.24612E-26 | 0.843111667 | 0.239 | 0.036 | 2.8712E-21  | KO | Prkaca        | 0.203 |
| Wipf2         | 9.44511E-26 | 0.711976494 | 0.277 | 0.049 | 2.93299E-21 | KO | Wipf2         | 0.228 |
| Ubap2         | 9.46593E-26 | 0.696636976 | 0.324 | 0.067 | 2.93945E-21 | KO | Ubap2         | 0.257 |
| Fam20b        | 9.67913E-26 | 1.040647141 | 0.197 | 0.022 | 3.00566E-21 | KO | Fam20b        | 0.175 |
| Dpy19l1       | 1.05275E-25 | 1.050905372 | 0.273 | 0.048 | 3.26912E-21 | KO | Dpy19l1       | 0.225 |
| Rab2b         | 1.09088E-25 | 1.562018223 | 0.151 | 0.01  | 3.38751E-21 | KO | Rab2b         | 0.141 |
| Fbxo34        | 1.14431E-25 | 1.52652415  | 0.176 | 0.016 | 3.55344E-21 | KO | Fbxo34        | 0.16  |
| Rhot2         | 1.22905E-25 | 0.896164667 | 0.235 | 0.035 | 3.81658E-21 | KO | Rhot2         | 0.2   |
| Cyp51         | 1.2447E-25  | 0.823374506 | 0.328 | 0.069 | 3.86516E-21 | KO | Cyp51         | 0.259 |
| Ezh1          | 1.32015E-25 | 1.090053647 | 0.227 | 0.032 | 4.09948E-21 | KO | Ezh1          | 0.195 |
| Nucks1        | 1.33339E-25 | 0.726072925 | 0.756 | 0.29  | 4.14056E-21 | KO | Nucks1        | 0.466 |
| Sertad2       | 1.33874E-25 | 0.69774935  | 0.273 | 0.048 | 4.15719E-21 | KO | Sertad2       | 0.225 |
| Eif4g2        | 1.41546E-25 | 0.766204225 | 0.895 | 0.397 | 4.39543E-21 | KO | Eif4g2        | 0.498 |
| Fdxr          | 1.58464E-25 | 0.707516266 | 0.286 | 0.053 | 4.92078E-21 | KO | Fdxr          | 0.233 |
| Inpp5b        | 1.64682E-25 | 0.829009166 | 0.256 | 0.042 | 5.11388E-21 | KO | Inpp5b        | 0.214 |
| Cotl1         | 1.67292E-25 | 0.879140306 | 0.857 | 0.416 | 5.19491E-21 | KO | Cotl1         | 0.441 |
| Rps6ka4       | 1.7296E-25  | 0.749446293 | 0.244 | 0.038 | 5.37093E-21 | KO | Rps6ka4       | 0.206 |
| Lsp1          | 1.81931E-25 | 0.724915153 | 0.887 | 0.383 | 5.64951E-21 | KO | Lsp1          | 0.504 |
| 1190007I07Ril | 1.90737E-25 | 1.019790057 | 0.282 | 0.052 | 5.92297E-21 | KO | 1190007I07Ril | 0.23  |
| Slc25a30      | 1.92277E-25 | 0.820684149 | 0.256 | 0.042 | 5.97077E-21 | KO | Slc25a30      | 0.214 |
| Sdf2l1        | 1.9455E-25  | 0.711042232 | 0.395 | 0.098 | 6.04136E-21 | KO | Sdf2l1        | 0.297 |
| Hyou1         | 2.13171E-25 | 0.81296023  | 0.256 | 0.042 | 6.6196E-21  | KO | Hyou1         | 0.214 |
| Sclt1         | 2.50893E-25 | 0.99843733  | 0.223 | 0.031 | 7.79099E-21 | KO | Sclt1         | 0.192 |
| Cep55         | 2.63003E-25 | 1.1458324   | 0.252 | 0.041 | 8.16704E-21 | KO | Cep55         | 0.211 |
| Gnl2          | 2.85582E-25 | 0.729696907 | 0.273 | 0.049 | 8.86819E-21 | KO | Gnl2          | 0.224 |
| Rac2          | 2.9794E-25  | 0.769418811 | 0.924 | 0.56  | 9.25193E-21 | KO | Rac2          | 0.364 |
| Vamp7         | 3.04872E-25 | 0.826346193 | 0.248 | 0.039 | 9.46718E-21 | KO | Vamp7         | 0.209 |
| Mettl3        | 3.27106E-25 | 0.965748255 | 0.168 | 0.014 | 1.01576E-20 | KO | Mettl3        | 0.154 |
| Ints10        | 3.39597E-25 | 1.101006803 | 0.21  | 0.027 | 1.05455E-20 | KO | Ints10        | 0.183 |
| Fam53c        | 3.48442E-25 | 0.888044833 | 0.265 | 0.046 | 1.08202E-20 | KO | Fam53c        | 0.219 |

|           |             |             |       |       |             |    |           |       |
|-----------|-------------|-------------|-------|-------|-------------|----|-----------|-------|
| Usp37     | 3.80704E-25 | 0.9914634   | 0.29  | 0.056 | 1.1822E-20  | KO | Usp37     | 0.234 |
| Il10rb    | 3.94708E-25 | 0.966470348 | 0.269 | 0.047 | 1.22569E-20 | KO | Il10rb    | 0.222 |
| Slc35d1   | 4.04892E-25 | 2.223355027 | 0.16  | 0.013 | 1.25731E-20 | KO | Slc35d1   | 0.147 |
| Suox      | 4.09368E-25 | 0.997339876 | 0.185 | 0.019 | 1.27121E-20 | KO | Suox      | 0.166 |
| Xpot      | 4.55659E-25 | 1.264349674 | 0.282 | 0.053 | 1.41496E-20 | KO | Xpot      | 0.229 |
| Secisbp2l | 4.59857E-25 | 0.70732128  | 0.269 | 0.047 | 1.42799E-20 | KO | Secisbp2l | 0.222 |
| Tmbim1    | 4.91932E-25 | 1.095991889 | 0.256 | 0.043 | 1.5276E-20  | KO | Tmbim1    | 0.213 |
| Rrad      | 5.3175E-25  | 1.227570017 | 0.202 | 0.025 | 1.65124E-20 | KO | Rrad      | 0.177 |
| E2f1      | 5.32726E-25 | 0.918584047 | 0.265 | 0.046 | 1.65427E-20 | KO | E2f1      | 0.219 |
| Tmem184b  | 5.36561E-25 | 1.156806382 | 0.16  | 0.013 | 1.66618E-20 | KO | Tmem184b  | 0.147 |
| Ramp3     | 5.38463E-25 | 0.771238519 | 0.345 | 0.079 | 1.67209E-20 | KO | Ramp3     | 0.266 |
| Arpc2     | 5.79381E-25 | 0.736132305 | 0.916 | 0.523 | 1.79915E-20 | KO | Arpc2     | 0.393 |
| Hmg20a    | 6.25336E-25 | 0.803506543 | 0.193 | 0.022 | 1.94186E-20 | KO | Hmg20a    | 0.171 |
| Gzmk      | 6.5558E-25  | 1.842960745 | 0.248 | 0.042 | 2.03577E-20 | KO | Gzmk      | 0.206 |
| Haus1     | 6.74879E-25 | 0.753608423 | 0.265 | 0.046 | 2.0957E-20  | KO | Haus1     | 0.219 |
| Polk      | 7.29625E-25 | 0.806999254 | 0.231 | 0.035 | 2.2657E-20  | KO | Polk      | 0.196 |
| Tm9sf4    | 7.70339E-25 | 0.976069802 | 0.261 | 0.045 | 2.39213E-20 | KO | Tm9sf4    | 0.216 |
| Pgrmc2    | 7.88336E-25 | 0.779334432 | 0.273 | 0.05  | 2.44802E-20 | KO | Pgrmc2    | 0.223 |
| Parp9     | 7.90573E-25 | 0.925484158 | 0.29  | 0.056 | 2.45497E-20 | KO | Parp9     | 0.234 |
| Cbx8      | 7.9816E-25  | 1.660558528 | 0.126 | 0.005 | 2.47852E-20 | KO | Cbx8      | 0.121 |
| Rybp      | 8.38319E-25 | 0.880549591 | 0.202 | 0.025 | 2.60323E-20 | KO | Rybp      | 0.177 |
| Slc25a20  | 9.1069E-25  | 0.814953267 | 0.239 | 0.038 | 2.82796E-20 | KO | Slc25a20  | 0.201 |
| Ing5      | 9.37162E-25 | 0.694447198 | 0.261 | 0.045 | 2.91017E-20 | KO | Ing5      | 0.216 |
| Plcb2     | 9.63015E-25 | 2.377940969 | 0.134 | 0.007 | 2.99045E-20 | KO | Plcb2     | 0.127 |
| Ptpn5     | 9.70929E-25 | 1.611238379 | 0.139 | 0.008 | 3.01503E-20 | KO | Ptpn5     | 0.131 |
| Prdm2     | 1.00653E-24 | 1.030900233 | 0.231 | 0.035 | 3.12557E-20 | KO | Prdm2     | 0.196 |
| Seh1l     | 1.01088E-24 | 0.98934308  | 0.298 | 0.061 | 3.13909E-20 | KO | Seh1l     | 0.237 |
| Arpc1b    | 1.02082E-24 | 0.722588716 | 0.908 | 0.462 | 3.16995E-20 | KO | Arpc1b    | 0.446 |
| Ap1g2     | 1.09289E-24 | 0.8266291   | 0.252 | 0.042 | 3.39376E-20 | KO | Ap1g2     | 0.21  |
| Bcl2l13   | 1.1548E-24  | 0.861135757 | 0.197 | 0.024 | 3.58601E-20 | KO | Bcl2l13   | 0.173 |
| Rsrp1     | 1.19769E-24 | 0.703499947 | 0.815 | 0.327 | 3.71918E-20 | KO | Rsrp1     | 0.488 |
| Rnf121    | 1.27536E-24 | 0.865623787 | 0.248 | 0.041 | 3.96038E-20 | KO | Rnf121    | 0.207 |
| Hsdl2     | 1.38443E-24 | 1.328358033 | 0.197 | 0.024 | 4.29908E-20 | KO | Hsdl2     | 0.173 |
| Slc5a3    | 1.46273E-24 | 0.938482438 | 0.269 | 0.049 | 4.54223E-20 | KO | Slc5a3    | 0.22  |
| Mdn1      | 1.51964E-24 | 0.912155947 | 0.294 | 0.059 | 4.71893E-20 | KO | Mdn1      | 0.235 |
| Nop58     | 1.53427E-24 | 0.750717753 | 0.508 | 0.158 | 4.76436E-20 | KO | Nop58     | 0.35  |
| Snx25     | 1.54384E-24 | 1.329455651 | 0.206 | 0.027 | 4.79409E-20 | KO | Snx25     | 0.179 |
| Med20     | 1.55135E-24 | 1.419284613 | 0.214 | 0.03  | 4.81742E-20 | KO | Med20     | 0.184 |
| Lzts1     | 1.56209E-24 | 0.800687097 | 0.197 | 0.024 | 4.85076E-20 | KO | Lzts1     | 0.173 |
| Cd101     | 1.58455E-24 | 1.482041144 | 0.164 | 0.014 | 4.92051E-20 | KO | Cd101     | 0.15  |
| Mthfs     | 1.6255E-24  | 1.319452011 | 0.168 | 0.015 | 5.04767E-20 | KO | Mthfs     | 0.153 |
| Cdk19     | 1.6765E-24  | 0.904647709 | 0.227 | 0.034 | 5.20602E-20 | KO | Cdk19     | 0.193 |
| Sec61b    | 1.69998E-24 | 0.772926309 | 0.924 | 0.476 | 5.27895E-20 | KO | Sec61b    | 0.448 |
| Pitpnm2   | 1.71636E-24 | 1.259354869 | 0.231 | 0.036 | 5.32981E-20 | KO | Pitpnm2   | 0.195 |
| Osbp      | 1.904E-24   | 1.265364281 | 0.223 | 0.033 | 5.9125E-20  | KO | Osbp      | 0.19  |
| Ccdc186   | 1.90592E-24 | 0.932361855 | 0.252 | 0.043 | 5.91845E-20 | KO | Ccdc186   | 0.209 |
| Rmi2      | 1.99444E-24 | 1.970636245 | 0.189 | 0.022 | 6.19334E-20 | KO | Rmi2      | 0.167 |
| Cysltr2   | 2.036E-24   | 0.819395017 | 0.261 | 0.046 | 6.3224E-20  | KO | Cysltr2   | 0.215 |
| Plod2     | 2.14675E-24 | 0.990797316 | 0.231 | 0.036 | 6.66629E-20 | KO | Plod2     | 0.195 |
| Clspn     | 2.32008E-24 | 1.04524775  | 0.328 | 0.074 | 7.20456E-20 | KO | Clspn     | 0.254 |
| Tpp1      | 2.48195E-24 | 1.156287867 | 0.239 | 0.038 | 7.7072E-20  | KO | Tpp1      | 0.201 |

|             |             |             |       |       |             |    |             |       |
|-------------|-------------|-------------|-------|-------|-------------|----|-------------|-------|
| Gm47015     | 2.56526E-24 | 1.376536694 | 0.248 | 0.042 | 7.96591E-20 | KO | Gm47015     | 0.206 |
| 2810004N23R | 2.60621E-24 | 0.765052949 | 0.261 | 0.046 | 8.09307E-20 | KO | 2810004N23R | 0.215 |
| Icmt        | 2.79846E-24 | 1.038080839 | 0.223 | 0.033 | 8.69004E-20 | KO | Icmt        | 0.19  |
| Smc2        | 2.80144E-24 | 1.183228749 | 0.496 | 0.17  | 8.6993E-20  | KO | Smc2        | 0.326 |
| Cyb561d2    | 2.83749E-24 | 1.165537187 | 0.214 | 0.03  | 8.81125E-20 | KO | Cyb561d2    | 0.184 |
| Qrfp        | 2.89945E-24 | 1.380223973 | 0.176 | 0.018 | 9.00366E-20 | KO | Qrfp        | 0.158 |
| Tcrg-C2     | 3.02525E-24 | 1.460632847 | 0.189 | 0.022 | 9.3943E-20  | KO | Tcrg-C2     | 0.167 |
| Wnt10b      | 3.09363E-24 | 2.263642784 | 0.151 | 0.012 | 9.60665E-20 | KO | Wnt10b      | 0.139 |
| Slc52a3     | 3.40244E-24 | 1.293629035 | 0.16  | 0.013 | 1.05656E-19 | KO | Slc52a3     | 0.147 |
| Snrpf       | 3.73429E-24 | 0.721552016 | 0.891 | 0.431 | 1.15961E-19 | KO | Snrpf       | 0.46  |
| Polb        | 3.79652E-24 | 0.921464316 | 0.277 | 0.053 | 1.17893E-19 | KO | Polb        | 0.224 |
| Galnt7      | 3.82149E-24 | 0.95053081  | 0.218 | 0.032 | 1.18669E-19 | KO | Galnt7      | 0.186 |
| Nuf2        | 3.90163E-24 | 1.554870928 | 0.218 | 0.032 | 1.21157E-19 | KO | Nuf2        | 0.186 |
| Hspbp1      | 3.95328E-24 | 0.943607025 | 0.332 | 0.076 | 1.22761E-19 | KO | Hspbp1      | 0.256 |
| Slf2        | 4.00955E-24 | 0.814731553 | 0.235 | 0.038 | 1.24509E-19 | KO | Slf2        | 0.197 |
| Hivep3      | 4.3021E-24  | 1.892944636 | 0.185 | 0.021 | 1.33593E-19 | KO | Hivep3      | 0.164 |
| Ncbp2       | 4.65556E-24 | 0.862317603 | 0.361 | 0.088 | 1.44569E-19 | KO | Ncbp2       | 0.273 |
| Iffo2       | 5.17187E-24 | 1.051183074 | 0.151 | 0.012 | 1.60602E-19 | KO | Iffo2       | 0.139 |
| Gabpa       | 5.56206E-24 | 0.745377492 | 0.294 | 0.06  | 1.72719E-19 | KO | Gabpa       | 0.234 |
| Atp2b2      | 5.6482E-24  | 2.44629664  | 0.143 | 0.01  | 1.75394E-19 | KO | Atp2b2      | 0.133 |
| Mcm4        | 6.2643E-24  | 0.787742435 | 0.424 | 0.12  | 1.94525E-19 | KO | Mcm4        | 0.304 |
| Mb21d1      | 6.44444E-24 | 1.280137648 | 0.143 | 0.01  | 2.00119E-19 | KO | Mb21d1      | 0.133 |
| Atp5f1      | 6.49921E-24 | 0.745609553 | 0.878 | 0.41  | 2.0182E-19  | KO | Atp5f1      | 0.468 |
| Gtpbp4      | 6.78954E-24 | 0.806192751 | 0.445 | 0.126 | 2.10836E-19 | KO | Gtpbp4      | 0.319 |
| Tmprss6     | 6.85414E-24 | 1.785135122 | 0.168 | 0.016 | 2.12842E-19 | KO | Tmprss6     | 0.152 |
| Erf         | 7.12508E-24 | 1.318281823 | 0.168 | 0.016 | 2.21255E-19 | KO | Erf         | 0.152 |
| Kif15       | 7.25693E-24 | 0.869208182 | 0.37  | 0.095 | 2.25349E-19 | KO | Kif15       | 0.275 |
| Cd160       | 7.28987E-24 | 1.035813493 | 0.307 | 0.066 | 2.26372E-19 | KO | Cd160       | 0.241 |
| Wdr6        | 7.5054E-24  | 0.726679148 | 0.206 | 0.028 | 2.33065E-19 | KO | Wdr6        | 0.178 |
| Cpox        | 8.80984E-24 | 1.407381748 | 0.193 | 0.024 | 2.73572E-19 | KO | Cpox        | 0.169 |
| Tgif2       | 8.88956E-24 | 1.038384585 | 0.168 | 0.016 | 2.76048E-19 | KO | Tgif2       | 0.152 |
| Klhl28      | 9.0218E-24  | 0.710635211 | 0.244 | 0.041 | 2.80154E-19 | KO | Klhl28      | 0.203 |
| Cd55        | 9.04601E-24 | 1.379020768 | 0.181 | 0.02  | 2.80906E-19 | KO | Cd55        | 0.161 |
| Ndc80       | 9.05575E-24 | 0.969110167 | 0.235 | 0.038 | 2.81208E-19 | KO | Ndc80       | 0.197 |
| Exoc3       | 9.40081E-24 | 0.722864015 | 0.294 | 0.061 | 2.91923E-19 | KO | Exoc3       | 0.233 |
| Nrbf2       | 9.49531E-24 | 0.814193649 | 0.282 | 0.056 | 2.94858E-19 | KO | Nrbf2       | 0.226 |
| Tbc1d10a    | 1.1001E-23  | 1.053529557 | 0.244 | 0.041 | 3.41613E-19 | KO | Tbc1d10a    | 0.203 |
| Spry2       | 1.13523E-23 | 1.082988675 | 0.214 | 0.031 | 3.52524E-19 | KO | Spry2       | 0.183 |
| Abtb2       | 1.18062E-23 | 0.890812789 | 0.181 | 0.02  | 3.66618E-19 | KO | Abtb2       | 0.161 |
| Tpx2        | 1.23267E-23 | 1.091125456 | 0.34  | 0.083 | 3.8278E-19  | KO | Tpx2        | 0.257 |
| Tmed8       | 1.23734E-23 | 0.983600995 | 0.181 | 0.02  | 3.84231E-19 | KO | Tmed8       | 0.161 |
| Usp24       | 1.26034E-23 | 0.891690041 | 0.282 | 0.056 | 3.91374E-19 | KO | Usp24       | 0.226 |
| Eomes       | 1.40943E-23 | 1.665781463 | 0.218 | 0.034 | 4.3767E-19  | KO | Eomes       | 0.184 |
| Tob1        | 1.41509E-23 | 1.559124566 | 0.176 | 0.019 | 4.39429E-19 | KO | Tob1        | 0.157 |
| Rad54l      | 1.43776E-23 | 0.993130237 | 0.21  | 0.03  | 4.46466E-19 | KO | Rad54l      | 0.18  |
| Taf9b       | 1.66945E-23 | 1.320086399 | 0.16  | 0.014 | 5.18415E-19 | KO | Taf9b       | 0.146 |
| Aspm        | 1.70447E-23 | 1.297095082 | 0.252 | 0.046 | 5.29289E-19 | KO | Aspm        | 0.206 |
| Creld2      | 1.74269E-23 | 0.979288913 | 0.265 | 0.05  | 5.41158E-19 | KO | Creld2      | 0.215 |
| Pkmyt1      | 1.78454E-23 | 0.811861955 | 0.265 | 0.05  | 5.54154E-19 | KO | Pkmyt1      | 0.215 |
| Zfp367      | 1.99273E-23 | 0.777071598 | 0.218 | 0.033 | 6.18802E-19 | KO | Zfp367      | 0.185 |
| Tnfsf9      | 2.04048E-23 | 2.076771541 | 0.172 | 0.018 | 6.33631E-19 | KO | Tnfsf9      | 0.154 |

|             |             |             |       |       |             |    |             |       |
|-------------|-------------|-------------|-------|-------|-------------|----|-------------|-------|
| Kptn        | 2.24845E-23 | 1.014349131 | 0.185 | 0.022 | 6.98211E-19 | KO | Kptn        | 0.163 |
| Junb        | 2.29504E-23 | 0.866076681 | 0.945 | 0.539 | 7.1268E-19  | KO | Junb        | 0.406 |
| Napsa       | 2.37938E-23 | 0.790458856 | 0.303 | 0.064 | 7.38869E-19 | KO | Napsa       | 0.239 |
| Pwwp2a      | 2.53584E-23 | 0.766507212 | 0.265 | 0.05  | 7.87454E-19 | KO | Pwwp2a      | 0.215 |
| Myl12a      | 2.64355E-23 | 0.740673055 | 0.908 | 0.462 | 8.20903E-19 | KO | Myl12a      | 0.446 |
| Pex6        | 2.96623E-23 | 0.775222306 | 0.197 | 0.026 | 9.21103E-19 | KO | Pex6        | 0.171 |
| Ptgr2       | 3.06563E-23 | 1.117827853 | 0.193 | 0.025 | 9.51969E-19 | KO | Ptgr2       | 0.168 |
| Senp5       | 3.08479E-23 | 0.77994812  | 0.223 | 0.035 | 9.57918E-19 | KO | Senp5       | 0.188 |
| Evi2a       | 3.09166E-23 | 0.739112143 | 0.235 | 0.039 | 9.60053E-19 | KO | Evi2a       | 0.196 |
| Prkdc       | 3.18397E-23 | 0.979145771 | 0.214 | 0.032 | 9.88718E-19 | KO | Prkdc       | 0.182 |
| Pdcd2       | 3.298E-23   | 0.826889165 | 0.298 | 0.063 | 1.02413E-18 | KO | Pdcd2       | 0.235 |
| Strbp       | 3.33187E-23 | 0.799865727 | 0.227 | 0.037 | 1.03465E-18 | KO | Strbp       | 0.19  |
| Zufsp       | 3.37281E-23 | 0.766718513 | 0.324 | 0.075 | 1.04736E-18 | KO | Zufsp       | 0.249 |
| Egr1        | 3.49873E-23 | 0.786279707 | 0.303 | 0.065 | 1.08646E-18 | KO | Egr1        | 0.238 |
| Fancm       | 3.8191E-23  | 0.891138061 | 0.168 | 0.017 | 1.18595E-18 | KO | Fancm       | 0.151 |
| Npnt        | 4.38946E-23 | 1.65090475  | 0.176 | 0.02  | 1.36306E-18 | KO | Npnt        | 0.156 |
| Ctnnd2      | 4.81091E-23 | 3.018291003 | 0.092 | 0     | 1.49393E-18 | KO | Ctnnd2      | 0.092 |
| Hnrnpu      | 5.77537E-23 | 0.743813156 | 0.853 | 0.385 | 1.79343E-18 | KO | Hnrnpu      | 0.468 |
| Hspa4l      | 6.38397E-23 | 1.25817154  | 0.227 | 0.038 | 1.98242E-18 | KO | Hspa4l      | 0.189 |
| Adamts6     | 6.40859E-23 | 1.096232165 | 0.189 | 0.024 | 1.99006E-18 | KO | Adamts6     | 0.165 |
| Elp5        | 6.6604E-23  | 0.829712482 | 0.34  | 0.082 | 2.06825E-18 | KO | Elp5        | 0.258 |
| Diaph2      | 6.88072E-23 | 0.803124244 | 0.214 | 0.033 | 2.13667E-18 | KO | Diaph2      | 0.181 |
| Slc14a1     | 7.05606E-23 | 2.29270203  | 0.126 | 0.007 | 2.19112E-18 | KO | Slc14a1     | 0.119 |
| Sgk1        | 7.12096E-23 | 0.875923967 | 0.235 | 0.04  | 2.21127E-18 | KO | Sgk1        | 0.195 |
| Ncapg2      | 7.26542E-23 | 0.747361186 | 0.332 | 0.081 | 2.25613E-18 | KO | Ncapg2      | 0.251 |
| Fkrp        | 7.4762E-23  | 1.822817447 | 0.13  | 0.008 | 2.32158E-18 | KO | Fkrp        | 0.122 |
| Nup35       | 8.05184E-23 | 1.30251942  | 0.16  | 0.015 | 2.50034E-18 | KO | Nup35       | 0.145 |
| Spc25       | 8.19274E-23 | 1.195587762 | 0.29  | 0.062 | 2.54409E-18 | KO | Spc25       | 0.228 |
| Chmp7       | 8.40749E-23 | 0.695531752 | 0.239 | 0.041 | 2.61078E-18 | KO | Chmp7       | 0.198 |
| Itpripl1    | 8.53067E-23 | 1.546283724 | 0.193 | 0.026 | 2.64903E-18 | KO | Itpripl1    | 0.167 |
| Ppif        | 8.96755E-23 | 0.956859446 | 0.235 | 0.04  | 2.78469E-18 | KO | Ppif        | 0.195 |
| Shkbp1      | 9.05435E-23 | 0.927388833 | 0.282 | 0.058 | 2.81165E-18 | KO | Shkbp1      | 0.224 |
| Memo1       | 9.14392E-23 | 0.808122103 | 0.303 | 0.066 | 2.83946E-18 | KO | Memo1       | 0.237 |
| Irf4        | 1.04094E-22 | 1.654935766 | 0.189 | 0.025 | 3.23243E-18 | KO | Irf4        | 0.164 |
| Uck2        | 1.08276E-22 | 0.923553802 | 0.282 | 0.059 | 3.3623E-18  | KO | Uck2        | 0.223 |
| Zfp646      | 1.23473E-22 | 0.786243468 | 0.248 | 0.045 | 3.8342E-18  | KO | Zfp646      | 0.203 |
| Notch2      | 1.29459E-22 | 1.611089285 | 0.168 | 0.018 | 4.02008E-18 | KO | Notch2      | 0.15  |
| Rnf19b      | 1.31956E-22 | 0.776925826 | 0.273 | 0.056 | 4.09764E-18 | KO | Rnf19b      | 0.217 |
| Mrpl10      | 1.41884E-22 | 0.850770564 | 0.21  | 0.032 | 4.40593E-18 | KO | Mrpl10      | 0.178 |
| Ccl5        | 1.55437E-22 | 2.024283041 | 0.815 | 0.544 | 4.82679E-18 | KO | Ccl5        | 0.271 |
| Fem1c       | 1.57011E-22 | 0.718551076 | 0.273 | 0.055 | 4.87566E-18 | KO | Fem1c       | 0.218 |
| Tmem164     | 1.57106E-22 | 0.881135766 | 0.239 | 0.042 | 4.87862E-18 | KO | Tmem164     | 0.197 |
| Ncapd2      | 1.6835E-22  | 0.922989503 | 0.412 | 0.12  | 5.22778E-18 | KO | Ncapd2      | 0.292 |
| 4930579G24R | 1.87373E-22 | 1.190329284 | 0.151 | 0.013 | 5.81848E-18 | KO | 4930579G24R | 0.138 |
| H2afv       | 1.98979E-22 | 0.778896357 | 0.752 | 0.324 | 6.1789E-18  | KO | H2afv       | 0.428 |
| Sgms1       | 2.00696E-22 | 1.197228875 | 0.248 | 0.046 | 6.23222E-18 | KO | Sgms1       | 0.202 |
| Foxp4       | 2.06599E-22 | 1.245253081 | 0.214 | 0.034 | 6.41553E-18 | KO | Foxp4       | 0.18  |
| Tjp2        | 2.07043E-22 | 0.959372449 | 0.189 | 0.025 | 6.4293E-18  | KO | Tjp2        | 0.164 |
| Traf5       | 2.14979E-22 | 1.117891044 | 0.176 | 0.021 | 6.67575E-18 | KO | Traf5       | 0.155 |
| Ing3        | 2.15634E-22 | 0.837015045 | 0.244 | 0.044 | 6.6961E-18  | KO | Ing3        | 0.2   |
| Slc39a1     | 2.24421E-22 | 0.791324278 | 0.239 | 0.042 | 6.96893E-18 | KO | Slc39a1     | 0.197 |

|             |             |             |       |       |             |    |             |       |
|-------------|-------------|-------------|-------|-------|-------------|----|-------------|-------|
| Neil1       | 2.48747E-22 | 1.244502865 | 0.147 | 0.013 | 7.72434E-18 | KO | Neil1       | 0.134 |
| Jade1       | 2.58469E-22 | 0.821219157 | 0.248 | 0.046 | 8.02624E-18 | KO | Jade1       | 0.202 |
| Gan         | 2.83308E-22 | 1.572138757 | 0.181 | 0.023 | 8.79757E-18 | KO | Gan         | 0.158 |
| Cryzl1      | 2.9354E-22  | 1.07801987  | 0.197 | 0.028 | 9.11529E-18 | KO | Cryzl1      | 0.169 |
| Agtppb1     | 3.0502E-22  | 0.828328569 | 0.214 | 0.034 | 9.47179E-18 | KO | Agtppb1     | 0.18  |
| Ly6c2       | 3.33269E-22 | 1.609382282 | 0.349 | 0.095 | 1.0349E-17  | KO | Ly6c2       | 0.254 |
| Ostf1       | 3.47248E-22 | 0.731791717 | 0.937 | 0.539 | 1.07831E-17 | KO | Ostf1       | 0.398 |
| Scly        | 3.49491E-22 | 0.752587256 | 0.214 | 0.034 | 1.08527E-17 | KO | Scly        | 0.18  |
| Tpra1       | 3.55836E-22 | 1.148886675 | 0.16  | 0.016 | 1.10498E-17 | KO | Tpra1       | 0.144 |
| Ptprj       | 3.62557E-22 | 0.771200648 | 0.227 | 0.038 | 1.12585E-17 | KO | Ptprj       | 0.189 |
| Psme2b      | 3.65606E-22 | 1.038756595 | 0.16  | 0.016 | 1.13532E-17 | KO | Psme2b      | 0.144 |
| Wdr83       | 3.7395E-22  | 0.814811937 | 0.265 | 0.053 | 1.16123E-17 | KO | Wdr83       | 0.212 |
| Ltv1        | 3.97474E-22 | 1.326908438 | 0.239 | 0.044 | 1.23428E-17 | KO | Ltv1        | 0.195 |
| Tiam1       | 4.03744E-22 | 1.100299147 | 0.235 | 0.042 | 1.25375E-17 | KO | Tiam1       | 0.193 |
| Pdzd11      | 4.05905E-22 | 0.989366928 | 0.235 | 0.041 | 1.26046E-17 | KO | Pdzd11      | 0.194 |
| Btbd10      | 4.22601E-22 | 1.01415362  | 0.202 | 0.03  | 1.3123E-17  | KO | Btbd10      | 0.172 |
| Nfyc        | 4.50799E-22 | 0.985182775 | 0.235 | 0.042 | 1.39987E-17 | KO | Nfyc        | 0.193 |
| Nudt18      | 4.90156E-22 | 0.818757662 | 0.193 | 0.027 | 1.52208E-17 | KO | Nudt18      | 0.166 |
| Hace1       | 5.04543E-22 | 1.089090243 | 0.185 | 0.024 | 1.56676E-17 | KO | Hace1       | 0.161 |
| Dip2a       | 5.12161E-22 | 1.769172013 | 0.109 | 0.004 | 1.59041E-17 | KO | Dip2a       | 0.105 |
| Nek8        | 5.40866E-22 | 0.714069791 | 0.193 | 0.027 | 1.67955E-17 | KO | Nek8        | 0.166 |
| Mcee        | 5.60884E-22 | 0.712427245 | 0.21  | 0.033 | 1.74171E-17 | KO | Mcee        | 0.177 |
| Nipsnap2    | 5.93038E-22 | 0.980488289 | 0.181 | 0.023 | 1.84156E-17 | KO | Nipsnap2    | 0.158 |
| Gpn2        | 6.04894E-22 | 1.125099763 | 0.168 | 0.019 | 1.87838E-17 | KO | Gpn2        | 0.149 |
| Hist1h2ab   | 6.25204E-22 | 1.862102984 | 0.118 | 0.006 | 1.94145E-17 | KO | Hist1h2ab   | 0.112 |
| Camk2n1     | 6.31754E-22 | 1.036520945 | 0.206 | 0.032 | 1.96179E-17 | KO | Camk2n1     | 0.174 |
| 9030025P20R | 6.9695E-22  | 2.004556991 | 0.118 | 0.006 | 2.16424E-17 | KO | 9030025P20R | 0.112 |
| Lmnb2       | 8.22557E-22 | 1.191706268 | 0.151 | 0.014 | 2.55429E-17 | KO | Lmnb2       | 0.137 |
| Mcu         | 8.56388E-22 | 1.189405684 | 0.21  | 0.034 | 2.65934E-17 | KO | Mcu         | 0.176 |
| Tbc1d7      | 8.74862E-22 | 1.037492312 | 0.189 | 0.026 | 2.71671E-17 | KO | Tbc1d7      | 0.163 |
| Ccp110      | 8.99001E-22 | 0.903772008 | 0.197 | 0.029 | 2.79167E-17 | KO | Ccp110      | 0.168 |
| Atpaf2      | 9.39491E-22 | 1.603369764 | 0.176 | 0.022 | 2.9174E-17  | KO | Atpaf2      | 0.154 |
| Ermp1       | 1.03343E-21 | 0.747207826 | 0.244 | 0.046 | 3.2091E-17  | KO | Ermp1       | 0.198 |
| Slc10a7     | 1.08741E-21 | 1.541608171 | 0.164 | 0.018 | 3.37674E-17 | KO | Slc10a7     | 0.146 |
| Fam120b     | 1.23047E-21 | 0.719498377 | 0.239 | 0.044 | 3.82097E-17 | KO | Fam120b     | 0.195 |
| Arhgap4     | 1.45756E-21 | 0.83481395  | 0.231 | 0.041 | 4.52616E-17 | KO | Arhgap4     | 0.19  |
| Hsp90aa1    | 1.53898E-21 | 0.894462394 | 0.912 | 0.488 | 4.77898E-17 | KO | Hsp90aa1    | 0.424 |
| Rgs14       | 1.5468E-21  | 0.934442479 | 0.193 | 0.028 | 4.80329E-17 | KO | Rgs14       | 0.165 |
| Nemp2       | 1.54845E-21 | 1.026321767 | 0.185 | 0.025 | 4.8084E-17  | KO | Nemp2       | 0.16  |
| Hmgb1       | 1.72245E-21 | 0.901975356 | 0.866 | 0.49  | 5.34872E-17 | KO | Hmgb1       | 0.376 |
| Rabgef1     | 1.80002E-21 | 0.701557088 | 0.202 | 0.031 | 5.5896E-17  | KO | Rabgef1     | 0.171 |
| Slc16a1     | 1.82396E-21 | 0.958217411 | 0.265 | 0.056 | 5.66395E-17 | KO | Slc16a1     | 0.209 |
| Arhgef3     | 1.96057E-21 | 0.748208924 | 0.218 | 0.038 | 6.08817E-17 | KO | Arhgef3     | 0.18  |
| Actn1       | 2.02166E-21 | 0.712545199 | 0.366 | 0.1   | 6.27787E-17 | KO | Actn1       | 0.266 |
| Umad1       | 2.05146E-21 | 1.469888325 | 0.139 | 0.012 | 6.37038E-17 | KO | Umad1       | 0.127 |
| Pprc1       | 2.05261E-21 | 0.881687821 | 0.172 | 0.021 | 6.37396E-17 | KO | Pprc1       | 0.151 |
| Tacc2       | 2.11241E-21 | 1.370100571 | 0.139 | 0.012 | 6.55967E-17 | KO | Tacc2       | 0.127 |
| Ap1s2       | 2.17783E-21 | 0.873632934 | 0.223 | 0.038 | 6.76282E-17 | KO | Ap1s2       | 0.185 |
| Rab11fip1   | 2.36404E-21 | 0.79291953  | 0.248 | 0.048 | 7.34106E-17 | KO | Rab11fip1   | 0.2   |
| Ap1ar       | 2.37751E-21 | 1.033235795 | 0.256 | 0.052 | 7.38289E-17 | KO | Ap1ar       | 0.204 |
| BC037034    | 2.40506E-21 | 0.852175119 | 0.206 | 0.033 | 7.46842E-17 | KO | BC037034    | 0.173 |

|             |             |             |       |       |             |    |             |       |
|-------------|-------------|-------------|-------|-------|-------------|----|-------------|-------|
| Hmgb2       | 2.4387E-21  | 1.057464769 | 0.92  | 0.566 | 7.5729E-17  | KO | Hmgb2       | 0.354 |
| Snip1       | 2.48965E-21 | 1.112729048 | 0.218 | 0.038 | 7.7311E-17  | KO | Snip1       | 0.18  |
| Mmadhc      | 2.97813E-21 | 0.792669635 | 0.319 | 0.079 | 9.24797E-17 | KO | Mmadhc      | 0.24  |
| Slc37a3     | 3.15268E-21 | 0.967312036 | 0.197 | 0.03  | 9.79002E-17 | KO | Slc37a3     | 0.167 |
| Rnf34       | 3.16349E-21 | 0.825066061 | 0.189 | 0.027 | 9.82358E-17 | KO | Rnf34       | 0.162 |
| Dynlt1a     | 3.20688E-21 | 1.079189724 | 0.134 | 0.011 | 9.95832E-17 | KO | Dynlt1a     | 0.123 |
| Cops7a      | 3.21394E-21 | 0.803071339 | 0.239 | 0.045 | 9.98024E-17 | KO | Cops7a      | 0.194 |
| Zbtb2       | 3.30003E-21 | 1.54744344  | 0.13  | 0.01  | 1.02476E-16 | KO | Zbtb2       | 0.12  |
| Wdr20       | 3.38102E-21 | 0.970965732 | 0.21  | 0.035 | 1.04991E-16 | KO | Wdr20       | 0.175 |
| Ofd1        | 3.51271E-21 | 0.807445038 | 0.176 | 0.023 | 1.0908E-16  | KO | Ofd1        | 0.153 |
| Lmtk3       | 3.525E-21   | 0.775341332 | 0.155 | 0.016 | 1.09462E-16 | KO | Lmtk3       | 0.139 |
| Eif2ak2     | 3.57986E-21 | 1.106300673 | 0.202 | 0.032 | 1.11165E-16 | KO | Eif2ak2     | 0.17  |
| Prdm4       | 3.67174E-21 | 1.18701156  | 0.197 | 0.03  | 1.14018E-16 | KO | Prdm4       | 0.167 |
| Supt3       | 3.87211E-21 | 1.03771308  | 0.193 | 0.029 | 1.20241E-16 | KO | Supt3       | 0.164 |
| Gnl3l       | 4.31418E-21 | 0.759128289 | 0.244 | 0.047 | 1.33968E-16 | KO | Gnl3l       | 0.197 |
| Itln1       | 4.59687E-21 | 3.320776696 | 0.084 | 0     | 1.42747E-16 | KO | Itln1       | 0.084 |
| Mcph1       | 4.89525E-21 | 1.066302187 | 0.151 | 0.015 | 1.52012E-16 | KO | Mcph1       | 0.136 |
| Tmem39a     | 4.93089E-21 | 0.99506731  | 0.185 | 0.026 | 1.53119E-16 | KO | Tmem39a     | 0.159 |
| 1600014C10R | 5.07931E-21 | 0.698799554 | 0.218 | 0.038 | 1.57728E-16 | KO | 1600014C10R | 0.18  |
| Focad       | 5.20253E-21 | 1.652510165 | 0.109 | 0.005 | 1.61554E-16 | KO | Focad       | 0.104 |
| Lpcat3      | 5.31671E-21 | 0.762581063 | 0.218 | 0.038 | 1.651E-16   | KO | Lpcat3      | 0.18  |
| Fgd3        | 5.40727E-21 | 1.631752079 | 0.147 | 0.014 | 1.67912E-16 | KO | Fgd3        | 0.133 |
| Tlnrd1      | 6.51226E-21 | 1.177773214 | 0.181 | 0.025 | 2.02225E-16 | KO | Tlnrd1      | 0.156 |
| Hectd3      | 6.6116E-21  | 0.949003257 | 0.172 | 0.022 | 2.0531E-16  | KO | Hectd3      | 0.15  |
| Pank3       | 6.78274E-21 | 0.725092324 | 0.214 | 0.037 | 2.10624E-16 | KO | Pank3       | 0.177 |
| Eif2d       | 6.82895E-21 | 0.844083689 | 0.239 | 0.046 | 2.12059E-16 | KO | Eif2d       | 0.193 |
| Slnf9       | 7.97849E-21 | 1.355474492 | 0.143 | 0.013 | 2.47756E-16 | KO | Slnf9       | 0.13  |
| Cenpe       | 9.11099E-21 | 1.151106657 | 0.294 | 0.071 | 2.82924E-16 | KO | Cenpe       | 0.223 |
| Cd83        | 9.46553E-21 | 1.808933296 | 0.197 | 0.032 | 2.93933E-16 | KO | Cd83        | 0.165 |
| Aldh3a2     | 1.09499E-20 | 0.868134409 | 0.168 | 0.021 | 3.40028E-16 | KO | Aldh3a2     | 0.147 |
| Txn1        | 1.11669E-20 | 0.704846859 | 0.908 | 0.546 | 3.46767E-16 | KO | Txn1        | 0.362 |
| Eps8l1      | 1.11774E-20 | 2.731712867 | 0.088 | 0.001 | 3.47091E-16 | KO | Eps8l1      | 0.087 |
| Fiz1        | 1.22326E-20 | 1.061268735 | 0.176 | 0.024 | 3.79858E-16 | KO | Fiz1        | 0.152 |
| Nup133      | 1.24521E-20 | 1.197526614 | 0.21  | 0.036 | 3.86675E-16 | KO | Nup133      | 0.174 |
| Cdc45       | 1.26211E-20 | 1.278160283 | 0.239 | 0.047 | 3.91923E-16 | KO | Cdc45       | 0.192 |
| Dhrs7b      | 1.29045E-20 | 0.815030888 | 0.21  | 0.036 | 4.00724E-16 | KO | Dhrs7b      | 0.174 |
| Pacs2       | 1.36433E-20 | 0.754726348 | 0.176 | 0.024 | 4.23664E-16 | KO | Pacs2       | 0.152 |
| Polr3b      | 1.37535E-20 | 1.56256308  | 0.151 | 0.016 | 4.27088E-16 | KO | Polr3b      | 0.135 |
| Gbp3        | 1.40804E-20 | 0.902891197 | 0.248 | 0.051 | 4.3724E-16  | KO | Gbp3        | 0.197 |
| Ppil3       | 1.50173E-20 | 0.788148    | 0.319 | 0.08  | 4.66334E-16 | KO | Ppil3       | 0.239 |
| Rfx1        | 1.56525E-20 | 0.697638022 | 0.202 | 0.033 | 4.86056E-16 | KO | Rfx1        | 0.169 |
| Gcnt1       | 1.60287E-20 | 0.93971766  | 0.185 | 0.027 | 4.9774E-16  | KO | Gcnt1       | 0.158 |
| Slc4a1ap    | 2.14429E-20 | 0.891488965 | 0.244 | 0.049 | 6.65867E-16 | KO | Slc4a1ap    | 0.195 |
| Fzd5        | 2.39582E-20 | 2.214865934 | 0.126 | 0.01  | 7.43975E-16 | KO | Fzd5        | 0.116 |
| Utp20       | 2.42152E-20 | 1.358585281 | 0.16  | 0.019 | 7.51955E-16 | KO | Utp20       | 0.141 |
| Tpmt        | 2.46086E-20 | 1.230055012 | 0.13  | 0.011 | 7.64172E-16 | KO | Tpmt        | 0.119 |
| Poc1b       | 2.57264E-20 | 0.833067272 | 0.16  | 0.019 | 7.98881E-16 | KO | Poc1b       | 0.141 |
| Nqo2        | 2.61015E-20 | 1.407393051 | 0.13  | 0.011 | 8.1053E-16  | KO | Nqo2        | 0.119 |
| Crmp1       | 2.70656E-20 | 1.282068627 | 0.172 | 0.023 | 8.40467E-16 | KO | Crmp1       | 0.149 |
| Pmepa1      | 2.96238E-20 | 1.304994381 | 0.181 | 0.026 | 9.19909E-16 | KO | Pmepa1      | 0.155 |
| Nxn         | 3.03507E-20 | 0.788051266 | 0.189 | 0.029 | 9.4248E-16  | KO | Nxn         | 0.16  |

|              |             |             |       |       |             |    |              |       |
|--------------|-------------|-------------|-------|-------|-------------|----|--------------|-------|
| Gdf11        | 3.16616E-20 | 2.783844358 | 0.097 | 0.003 | 9.83189E-16 | KO | Gdf11        | 0.094 |
| Ift140       | 3.21847E-20 | 1.204809381 | 0.126 | 0.01  | 9.99431E-16 | KO | Ift140       | 0.116 |
| Sertad1      | 3.22484E-20 | 0.857945214 | 0.248 | 0.051 | 1.00141E-15 | KO | Sertad1      | 0.197 |
| Usb1         | 3.25741E-20 | 1.131697496 | 0.126 | 0.01  | 1.01152E-15 | KO | Usb1         | 0.116 |
| Eil          | 3.36727E-20 | 0.894102518 | 0.176 | 0.025 | 1.04564E-15 | KO | Eil          | 0.151 |
| Sptlc1       | 3.55813E-20 | 0.810950561 | 0.244 | 0.049 | 1.10491E-15 | KO | Sptlc1       | 0.195 |
| Rfc3         | 3.65316E-20 | 0.75977495  | 0.298 | 0.074 | 1.13441E-15 | KO | Rfc3         | 0.224 |
| Ckap2l       | 3.9584E-20  | 1.006151254 | 0.214 | 0.038 | 1.2292E-15  | KO | Ckap2l       | 0.176 |
| Mtf1         | 4.08689E-20 | 0.883059539 | 0.227 | 0.043 | 1.2691E-15  | KO | Mtf1         | 0.184 |
| Muc1         | 4.12046E-20 | 2.030030322 | 0.101 | 0.004 | 1.27953E-15 | KO | Muc1         | 0.097 |
| Pitrm1       | 4.15084E-20 | 0.863558268 | 0.202 | 0.034 | 1.28896E-15 | KO | Pitrm1       | 0.168 |
| Espl1        | 4.29927E-20 | 1.174246979 | 0.185 | 0.028 | 1.33505E-15 | KO | Espl1        | 0.157 |
| Il13         | 4.47754E-20 | 5.870952057 | 0.08  | 0     | 1.39041E-15 | KO | Il13         | 0.08  |
| Abcd1        | 4.56683E-20 | 0.824986712 | 0.168 | 0.022 | 1.41814E-15 | KO | Abcd1        | 0.146 |
| Sufu         | 4.6854E-20  | 0.956586251 | 0.155 | 0.018 | 1.45496E-15 | KO | Sufu         | 0.137 |
| Snx27        | 5.25762E-20 | 0.754945795 | 0.206 | 0.036 | 1.63265E-15 | KO | Snx27        | 0.17  |
| S100a6       | 5.37926E-20 | 0.951764292 | 0.882 | 0.693 | 1.67042E-15 | KO | S100a6       | 0.189 |
| Ankrd27      | 5.38131E-20 | 1.00000023  | 0.185 | 0.028 | 1.67106E-15 | KO | Ankrd27      | 0.157 |
| Casp7        | 5.74545E-20 | 0.83436115  | 0.193 | 0.031 | 1.78413E-15 | KO | Casp7        | 0.162 |
| Figl1        | 5.91486E-20 | 1.006661875 | 0.21  | 0.038 | 1.83674E-15 | KO | Figl1        | 0.172 |
| 1110004E09Ri | 6.0651E-20  | 1.107801608 | 0.239 | 0.049 | 1.8834E-15  | KO | 1110004E09Ri | 0.19  |
| E2f6         | 6.07652E-20 | 1.347983664 | 0.139 | 0.013 | 1.88694E-15 | KO | E2f6         | 0.126 |
| Rab6b        | 6.31599E-20 | 1.532715323 | 0.139 | 0.013 | 1.9613E-15  | KO | Rab6b        | 0.126 |
| Myb          | 6.61124E-20 | 0.744766776 | 0.269 | 0.062 | 2.05299E-15 | KO | Myb          | 0.207 |
| Cep162       | 6.70174E-20 | 0.725978717 | 0.185 | 0.028 | 2.08109E-15 | KO | Cep162       | 0.157 |
| Cobll1       | 6.88707E-20 | 1.204441158 | 0.151 | 0.017 | 2.13864E-15 | KO | Cobll1       | 0.134 |
| Zfp703       | 7.11928E-20 | 1.259428088 | 0.164 | 0.021 | 2.21075E-15 | KO | Zfp703       | 0.143 |
| Mir155hg     | 8.35762E-20 | 1.002002333 | 0.256 | 0.057 | 2.59529E-15 | KO | Mir155hg     | 0.199 |
| Pepd         | 8.51769E-20 | 1.545540451 | 0.16  | 0.02  | 2.645E-15   | KO | Pepd         | 0.14  |
| Kctd5        | 8.99705E-20 | 0.856414336 | 0.189 | 0.03  | 2.79385E-15 | KO | Kctd5        | 0.159 |
| Ctla2b       | 9.08762E-20 | 1.142228868 | 0.134 | 0.013 | 2.82198E-15 | KO | Ctla2b       | 0.121 |
| Ero1lb       | 9.14263E-20 | 0.954244217 | 0.151 | 0.017 | 2.83906E-15 | KO | Ero1lb       | 0.134 |
| Ammecr1l     | 9.21533E-20 | 0.841964867 | 0.223 | 0.042 | 2.86164E-15 | KO | Ammecr1l     | 0.181 |
| Ncoa1        | 9.21536E-20 | 0.736485958 | 0.218 | 0.04  | 2.86165E-15 | KO | Ncoa1        | 0.178 |
| Pgghg        | 9.42907E-20 | 1.122975195 | 0.151 | 0.017 | 2.92801E-15 | KO | Pgghg        | 0.134 |
| Fam26f       | 9.8713E-20  | 1.164238819 | 0.193 | 0.032 | 3.06533E-15 | KO | Fam26f       | 0.161 |
| Rfc5         | 1.05433E-19 | 0.889242391 | 0.282 | 0.067 | 3.27402E-15 | KO | Rfc5         | 0.215 |
| Slfn8        | 1.07039E-19 | 0.828761867 | 0.181 | 0.027 | 3.32387E-15 | KO | Slfn8        | 0.154 |
| Cog6         | 1.16365E-19 | 1.218927585 | 0.13  | 0.012 | 3.61348E-15 | KO | Cog6         | 0.118 |
| Crls1        | 1.2164E-19  | 0.719552779 | 0.202 | 0.035 | 3.7773E-15  | KO | Crls1        | 0.167 |
| B3glct       | 1.34368E-19 | 1.153927005 | 0.147 | 0.016 | 4.17252E-15 | KO | B3glct       | 0.131 |
| Snx16        | 1.35012E-19 | 1.135256943 | 0.13  | 0.012 | 4.19253E-15 | KO | Snx16        | 0.118 |
| Lmtk2        | 1.38436E-19 | 2.434478037 | 0.126 | 0.011 | 4.29887E-15 | KO | Lmtk2        | 0.115 |
| Ikzf4        | 1.39206E-19 | 1.233196284 | 0.168 | 0.023 | 4.32277E-15 | KO | Ikzf4        | 0.145 |
| Ece1         | 1.40515E-19 | 0.944963327 | 0.273 | 0.064 | 4.3634E-15  | KO | Ece1         | 0.209 |
| Kif11        | 1.46532E-19 | 1.090815245 | 0.303 | 0.079 | 4.55025E-15 | KO | Kif11        | 0.224 |
| Yeats2       | 1.47817E-19 | 0.806176019 | 0.206 | 0.037 | 4.59017E-15 | KO | Yeats2       | 0.169 |
| Wdr36        | 1.58953E-19 | 0.723596184 | 0.197 | 0.034 | 4.93597E-15 | KO | Wdr36        | 0.163 |
| Car5b        | 1.71874E-19 | 1.445866865 | 0.155 | 0.019 | 5.33721E-15 | KO | Car5b        | 0.136 |
| Ank          | 1.82429E-19 | 0.96180105  | 0.143 | 0.015 | 5.66496E-15 | KO | Ank          | 0.128 |
| Izumo1r      | 1.88097E-19 | 0.965863462 | 0.21  | 0.038 | 5.84099E-15 | KO | Izumo1r      | 0.172 |



|              |             |             |       |       |             |    |              |       |
|--------------|-------------|-------------|-------|-------|-------------|----|--------------|-------|
| Phtf2        | 2.00066E-19 | 0.913314903 | 0.172 | 0.025 | 6.21266E-15 | KO | Phtf2        | 0.147 |
| Top2a        | 2.11911E-19 | 1.420614697 | 0.504 | 0.22  | 6.58048E-15 | KO | Top2a        | 0.284 |
| Rad52        | 2.26575E-19 | 0.753855403 | 0.143 | 0.015 | 7.03584E-15 | KO | Rad52        | 0.128 |
| Zfp865       | 2.45655E-19 | 0.742464163 | 0.189 | 0.031 | 7.62833E-15 | KO | Zfp865       | 0.158 |
| Taf8         | 2.70345E-19 | 1.464088634 | 0.139 | 0.014 | 8.39501E-15 | KO | Taf8         | 0.125 |
| Mettl7a1     | 2.93E-19    | 2.215478755 | 0.113 | 0.008 | 9.09852E-15 | KO | Mettl7a1     | 0.105 |
| Hist1h2ai    | 2.95702E-19 | 1.898752934 | 0.092 | 0.003 | 9.18243E-15 | KO | Hist1h2ai    | 0.089 |
| Spdl1        | 3.31215E-19 | 1.666877156 | 0.16  | 0.021 | 1.02852E-14 | KO | Spdl1        | 0.139 |
| Arfp1        | 3.31258E-19 | 0.919931953 | 0.181 | 0.028 | 1.02866E-14 | KO | Arfp1        | 0.153 |
| Hist1h2ae    | 3.43916E-19 | 1.003501207 | 0.395 | 0.128 | 1.06796E-14 | KO | Hist1h2ae    | 0.267 |
| Ube2w        | 3.60659E-19 | 0.913447533 | 0.214 | 0.04  | 1.11995E-14 | KO | Ube2w        | 0.174 |
| Syap1        | 3.98881E-19 | 0.704139288 | 0.193 | 0.033 | 1.23865E-14 | KO | Syap1        | 0.16  |
| Phlda1       | 4.31273E-19 | 1.250139048 | 0.336 | 0.096 | 1.33923E-14 | KO | Phlda1       | 0.24  |
| Sik2         | 4.42534E-19 | 0.754004073 | 0.176 | 0.027 | 1.3742E-14  | KO | Sik2         | 0.149 |
| Cep128       | 4.61586E-19 | 1.110248893 | 0.168 | 0.024 | 1.43336E-14 | KO | Cep128       | 0.144 |
| Tmem175      | 4.62897E-19 | 1.310994555 | 0.134 | 0.013 | 1.43744E-14 | KO | Tmem175      | 0.121 |
| Tmem86b      | 4.63596E-19 | 0.805674712 | 0.105 | 0.006 | 1.43961E-14 | KO | Tmem86b      | 0.099 |
| Sdr39u1      | 4.93443E-19 | 0.8810428   | 0.185 | 0.03  | 1.53229E-14 | KO | Sdr39u1      | 0.155 |
| Ccne2        | 6.82103E-19 | 1.531486596 | 0.155 | 0.02  | 2.11813E-14 | KO | Ccne2        | 0.135 |
| Slc25a16     | 6.90626E-19 | 1.328933403 | 0.164 | 0.023 | 2.1446E-14  | KO | Slc25a16     | 0.141 |
| Irgm1        | 7.23591E-19 | 0.850899493 | 0.164 | 0.023 | 2.24697E-14 | KO | Irgm1        | 0.141 |
| Thoc6        | 7.28334E-19 | 1.083323321 | 0.214 | 0.041 | 2.2617E-14  | KO | Thoc6        | 0.173 |
| Alg1         | 7.51076E-19 | 0.96542645  | 0.164 | 0.023 | 2.33232E-14 | KO | Alg1         | 0.141 |
| Lrrc42       | 8.16748E-19 | 0.977989955 | 0.164 | 0.023 | 2.53625E-14 | KO | Lrrc42       | 0.141 |
| Gstcd        | 8.68033E-19 | 0.958788073 | 0.172 | 0.026 | 2.6955E-14  | KO | Gstcd        | 0.146 |
| Trim5        | 8.93175E-19 | 0.804595982 | 0.181 | 0.029 | 2.77358E-14 | KO | Trim5        | 0.152 |
| AU040320     | 8.98994E-19 | 0.767866467 | 0.155 | 0.02  | 2.79165E-14 | KO | AU040320     | 0.135 |
| 9330175E14Ri | 9.10739E-19 | 1.296141057 | 0.143 | 0.016 | 2.82812E-14 | KO | 9330175E14Ri | 0.127 |
| Usp42        | 9.88254E-19 | 0.694228819 | 0.164 | 0.023 | 3.06882E-14 | KO | Usp42        | 0.141 |
| Exph5        | 9.98206E-19 | 1.089243717 | 0.235 | 0.051 | 3.09973E-14 | KO | Exph5        | 0.184 |
| Dffa         | 1.16987E-18 | 1.325807677 | 0.139 | 0.015 | 3.63281E-14 | KO | Dffa         | 0.124 |
| Spp1         | 1.18575E-18 | 1.610276837 | 0.303 | 0.088 | 3.68212E-14 | KO | Spp1         | 0.215 |
| Srxn1        | 1.25207E-18 | 1.102459192 | 0.139 | 0.015 | 3.88804E-14 | KO | Srxn1        | 0.124 |
| Csgalnact2   | 1.26907E-18 | 1.291354038 | 0.151 | 0.019 | 3.94084E-14 | KO | Csgalnact2   | 0.132 |
| Ppa2         | 1.34216E-18 | 0.926037849 | 0.218 | 0.044 | 4.16782E-14 | KO | Ppa2         | 0.174 |
| Rabif        | 1.39718E-18 | 0.75750099  | 0.218 | 0.043 | 4.33866E-14 | KO | Rabif        | 0.175 |
| Fanci        | 1.43322E-18 | 1.143526588 | 0.122 | 0.011 | 4.45059E-14 | KO | Fanci        | 0.111 |
| Zscan29      | 1.46414E-18 | 0.997063403 | 0.139 | 0.015 | 4.54658E-14 | KO | Zscan29      | 0.124 |
| Myc          | 1.46914E-18 | 0.764566052 | 0.227 | 0.047 | 4.56213E-14 | KO | Myc          | 0.18  |
| Tor4a        | 1.52644E-18 | 0.884693084 | 0.139 | 0.015 | 4.74006E-14 | KO | Tor4a        | 0.124 |
| Tmco6        | 1.7403E-18  | 1.588834891 | 0.118 | 0.01  | 5.40415E-14 | KO | Tmco6        | 0.108 |
| E130308A19R  | 1.79544E-18 | 1.016929717 | 0.202 | 0.038 | 5.57537E-14 | KO | E130308A19R  | 0.164 |
| Izumo4       | 1.91369E-18 | 0.694134677 | 0.176 | 0.028 | 5.94257E-14 | KO | Izumo4       | 0.148 |
| Hmmr         | 2.0027E-18  | 0.756310124 | 0.239 | 0.054 | 6.21899E-14 | KO | Hmmr         | 0.185 |
| Cant1        | 2.0475E-18  | 0.795716418 | 0.214 | 0.042 | 6.35811E-14 | KO | Cant1        | 0.172 |
| Dcaf17       | 2.0682E-18  | 1.456339438 | 0.155 | 0.021 | 6.42239E-14 | KO | Dcaf17       | 0.134 |
| Wdr55        | 2.30097E-18 | 0.763732041 | 0.147 | 0.018 | 7.14521E-14 | KO | Wdr55        | 0.129 |
| Rad51d       | 2.38443E-18 | 0.952516188 | 0.155 | 0.021 | 7.40436E-14 | KO | Rad51d       | 0.134 |
| Ino80c       | 2.44864E-18 | 0.907651976 | 0.248 | 0.056 | 7.60375E-14 | KO | Ino80c       | 0.192 |
| Mycbp        | 2.87533E-18 | 0.938528405 | 0.164 | 0.024 | 8.92876E-14 | KO | Mycbp        | 0.14  |
| Dnajc10      | 2.95554E-18 | 0.792220671 | 0.244 | 0.055 | 9.17785E-14 | KO | Dnajc10      | 0.189 |

|             |             |             |       |       |             |    |             |       |
|-------------|-------------|-------------|-------|-------|-------------|----|-------------|-------|
| Arl13b      | 3.08218E-18 | 2.046383066 | 0.143 | 0.017 | 9.5711E-14  | KO | Arl13b      | 0.126 |
| Leo1        | 3.11732E-18 | 1.013632681 | 0.176 | 0.029 | 9.68021E-14 | KO | Leo1        | 0.147 |
| Gphn        | 3.20032E-18 | 2.445681533 | 0.105 | 0.007 | 9.93795E-14 | KO | Gphn        | 0.098 |
| Tacc3       | 3.2757E-18  | 0.813497119 | 0.34  | 0.102 | 1.0172E-13  | KO | Tacc3       | 0.238 |
| Entpd6      | 3.31074E-18 | 1.25081947  | 0.13  | 0.013 | 1.02808E-13 | KO | Entpd6      | 0.117 |
| Bub1b       | 3.35012E-18 | 0.712101991 | 0.265 | 0.064 | 1.04031E-13 | KO | Bub1b       | 0.201 |
| Mafk        | 3.35643E-18 | 1.005537127 | 0.143 | 0.017 | 1.04227E-13 | KO | Mafk        | 0.126 |
| Tnfsf13b    | 3.39176E-18 | 0.796353886 | 0.13  | 0.013 | 1.05324E-13 | KO | Tnfsf13b    | 0.117 |
| Slc10a3     | 3.4358E-18  | 1.893913783 | 0.092 | 0.004 | 1.06692E-13 | KO | Slc10a3     | 0.088 |
| Slx4ip      | 3.55971E-18 | 0.913718672 | 0.13  | 0.013 | 1.1054E-13  | KO | Slx4ip      | 0.117 |
| Gypc        | 3.61834E-18 | 0.846238907 | 0.143 | 0.017 | 1.1236E-13  | KO | Gypc        | 0.126 |
| Zfp831      | 3.69816E-18 | 2.513429408 | 0.097 | 0.005 | 1.14839E-13 | KO | Zfp831      | 0.092 |
| Pigh        | 3.78139E-18 | 1.237984899 | 0.101 | 0.006 | 1.17424E-13 | KO | Pigh        | 0.095 |
| Igsf5       | 4.22086E-18 | 2.675605262 | 0.071 | 0     | 1.31071E-13 | KO | Igsf5       | 0.071 |
| Eml3        | 4.98157E-18 | 0.732527444 | 0.206 | 0.04  | 1.54693E-13 | KO | Eml3        | 0.166 |
| Dhrs1       | 5.05844E-18 | 0.890839188 | 0.206 | 0.04  | 1.5708E-13  | KO | Dhrs1       | 0.166 |
| Ncald       | 5.13315E-18 | 0.989971818 | 0.181 | 0.031 | 1.594E-13   | KO | Ncald       | 0.15  |
| Fam20a      | 5.45522E-18 | 0.95389741  | 0.139 | 0.016 | 1.69401E-13 | KO | Fam20a      | 0.123 |
| Suv39h2     | 5.48298E-18 | 1.098271337 | 0.139 | 0.016 | 1.70263E-13 | KO | Suv39h2     | 0.123 |
| Vps18       | 6.09911E-18 | 1.207674696 | 0.139 | 0.016 | 1.89396E-13 | KO | Vps18       | 0.123 |
| Rrp36       | 6.56954E-18 | 0.810334349 | 0.181 | 0.031 | 2.04004E-13 | KO | Rrp36       | 0.15  |
| Slc39a9     | 7.06433E-18 | 1.07779845  | 0.147 | 0.019 | 2.19369E-13 | KO | Slc39a9     | 0.128 |
| Ubxn8       | 7.14813E-18 | 0.876846365 | 0.193 | 0.036 | 2.21971E-13 | KO | Ubxn8       | 0.157 |
| Ccr7        | 7.80204E-18 | 1.46455442  | 0.416 | 0.159 | 2.42277E-13 | KO | Ccr7        | 0.257 |
| Txlng       | 8.57976E-18 | 0.773504518 | 0.185 | 0.033 | 2.66427E-13 | KO | Txlng       | 0.152 |
| Trmt13      | 8.75471E-18 | 0.852544728 | 0.197 | 0.038 | 2.7186E-13  | KO | Trmt13      | 0.159 |
| Nol6        | 8.97877E-18 | 0.944542238 | 0.172 | 0.028 | 2.78818E-13 | KO | Nol6        | 0.144 |
| Melk        | 9.01065E-18 | 1.218838929 | 0.185 | 0.033 | 2.79808E-13 | KO | Melk        | 0.152 |
| Net1        | 9.08452E-18 | 0.846005302 | 0.185 | 0.033 | 2.82101E-13 | KO | Net1        | 0.152 |
| Crtam       | 9.13453E-18 | 2.416658898 | 0.202 | 0.041 | 2.83655E-13 | KO | Crtam       | 0.161 |
| Gcc1        | 9.75792E-18 | 1.032841647 | 0.134 | 0.015 | 3.03013E-13 | KO | Gcc1        | 0.119 |
| Gemin5      | 1.0093E-17  | 1.162440524 | 0.164 | 0.025 | 3.13417E-13 | KO | Gemin5      | 0.139 |
| Adgrl1      | 1.06454E-17 | 0.727050647 | 0.164 | 0.025 | 3.30571E-13 | KO | Adgrl1      | 0.139 |
| Tnfsf4      | 1.08161E-17 | 1.66739767  | 0.189 | 0.036 | 3.35874E-13 | KO | Tnfsf4      | 0.153 |
| Mrc2        | 1.0915E-17  | 1.019835324 | 0.118 | 0.011 | 3.38942E-13 | KO | Mrc2        | 0.107 |
| Exd2        | 1.14324E-17 | 1.488676514 | 0.13  | 0.014 | 3.55009E-13 | KO | Exd2        | 0.116 |
| Dph6        | 1.19161E-17 | 1.292745123 | 0.143 | 0.018 | 3.7003E-13  | KO | Dph6        | 0.125 |
| Gbp5        | 1.20006E-17 | 0.730838483 | 0.176 | 0.03  | 3.72656E-13 | KO | Gbp5        | 0.146 |
| Zbtb21      | 1.243E-17   | 0.914650526 | 0.13  | 0.014 | 3.8599E-13  | KO | Zbtb21      | 0.116 |
| Heg1        | 1.29399E-17 | 0.859161074 | 0.16  | 0.024 | 4.01824E-13 | KO | Heg1        | 0.136 |
| Tec         | 1.33732E-17 | 1.052724906 | 0.13  | 0.014 | 4.15277E-13 | KO | Tec         | 0.116 |
| Ryk         | 1.40295E-17 | 1.077216064 | 0.16  | 0.024 | 4.35658E-13 | KO | Ryk         | 0.136 |
| Kntc1       | 1.41833E-17 | 1.242307132 | 0.151 | 0.021 | 4.40435E-13 | KO | Kntc1       | 0.13  |
| Zc3h12d     | 1.57468E-17 | 0.927198529 | 0.197 | 0.038 | 4.88986E-13 | KO | Zc3h12d     | 0.159 |
| Ccr2        | 1.71536E-17 | 1.189231709 | 0.269 | 0.07  | 5.3267E-13  | KO | Ccr2        | 0.199 |
| 0610009O20R | 1.80734E-17 | 0.699269856 | 0.151 | 0.021 | 5.61232E-13 | KO | 0610009O20R | 0.13  |
| Epas1       | 1.83145E-17 | 0.780603296 | 0.214 | 0.045 | 5.6872E-13  | KO | Epas1       | 0.169 |
| Tmem107     | 1.85796E-17 | 1.912747743 | 0.109 | 0.009 | 5.76953E-13 | KO | Tmem107     | 0.1   |
| Rbm45       | 2.06091E-17 | 1.138862992 | 0.126 | 0.013 | 6.39974E-13 | KO | Rbm45       | 0.113 |
| Micu1       | 2.08214E-17 | 1.0471919   | 0.181 | 0.032 | 6.46568E-13 | KO | Micu1       | 0.149 |
| Myo1e       | 2.18906E-17 | 1.045574043 | 0.139 | 0.017 | 6.79769E-13 | KO | Myo1e       | 0.122 |

|              |             |             |       |       |             |    |              |       |
|--------------|-------------|-------------|-------|-------|-------------|----|--------------|-------|
| Csf2         | 2.21901E-17 | 4.446188801 | 0.088 | 0.004 | 6.89068E-13 | KO | Csf2         | 0.084 |
| Rrm2         | 2.25826E-17 | 1.161914485 | 0.315 | 0.096 | 7.01258E-13 | KO | Rrm2         | 0.219 |
| Galnt18      | 2.51356E-17 | 2.048130325 | 0.084 | 0.003 | 7.80537E-13 | KO | Galnt18      | 0.081 |
| Ccdc80       | 2.58673E-17 | 2.688759863 | 0.088 | 0.004 | 8.03259E-13 | KO | Ccdc80       | 0.084 |
| Mcub         | 2.71251E-17 | 0.875572729 | 0.185 | 0.034 | 8.42317E-13 | KO | Mcub         | 0.151 |
| Rab11fip2    | 2.75534E-17 | 0.916924428 | 0.164 | 0.026 | 8.55617E-13 | KO | Rab11fip2    | 0.138 |
| Ebag9        | 2.75565E-17 | 0.974273697 | 0.176 | 0.031 | 8.55712E-13 | KO | Ebag9        | 0.145 |
| Unc13b       | 2.79549E-17 | 2.917460524 | 0.092 | 0.005 | 8.68083E-13 | KO | Unc13b       | 0.087 |
| Pde4dip      | 2.95393E-17 | 1.033929432 | 0.164 | 0.026 | 9.17284E-13 | KO | Pde4dip      | 0.138 |
| Il1rap       | 3.11656E-17 | 0.809180574 | 0.122 | 0.013 | 9.67785E-13 | KO | Il1rap       | 0.109 |
| Usp22        | 3.26252E-17 | 0.973875655 | 0.176 | 0.031 | 1.01311E-12 | KO | Usp22        | 0.145 |
| Exoc3l       | 3.29955E-17 | 1.455320776 | 0.097 | 0.006 | 1.02461E-12 | KO | Exoc3l       | 0.091 |
| Aldoc        | 3.30099E-17 | 1.396388003 | 0.134 | 0.016 | 1.02506E-12 | KO | Aldoc        | 0.118 |
| Ccl27a       | 3.36092E-17 | 1.489758728 | 0.122 | 0.013 | 1.04367E-12 | KO | Ccl27a       | 0.109 |
| Tmem251      | 3.50692E-17 | 0.773521254 | 0.189 | 0.036 | 1.089E-12   | KO | Tmem251      | 0.153 |
| Nusap1       | 4.05863E-17 | 1.220599532 | 0.324 | 0.102 | 1.26033E-12 | KO | Nusap1       | 0.222 |
| Nudt2        | 4.10098E-17 | 0.886706588 | 0.189 | 0.036 | 1.27348E-12 | KO | Nudt2        | 0.153 |
| Kdm1b        | 4.13329E-17 | 0.702005961 | 0.134 | 0.016 | 1.28351E-12 | KO | Kdm1b        | 0.118 |
| N6amt1       | 4.38028E-17 | 0.947877389 | 0.151 | 0.022 | 1.36021E-12 | KO | N6amt1       | 0.129 |
| Tmem167b     | 4.8915E-17  | 0.952919542 | 0.143 | 0.019 | 1.51896E-12 | KO | Tmem167b     | 0.124 |
| Pde6d        | 4.89774E-17 | 1.041524368 | 0.118 | 0.012 | 1.52089E-12 | KO | Pde6d        | 0.106 |
| Fbxo4        | 4.98341E-17 | 0.749984257 | 0.16  | 0.025 | 1.5475E-12  | KO | Fbxo4        | 0.135 |
| Zfp513       | 5.00907E-17 | 0.845145488 | 0.143 | 0.019 | 1.55547E-12 | KO | Zfp513       | 0.124 |
| 1110032F04Ri | 5.20247E-17 | 1.272550566 | 0.118 | 0.012 | 1.61552E-12 | KO | 1110032F04Ri | 0.106 |
| Gmppb        | 6.24936E-17 | 0.905289434 | 0.185 | 0.035 | 1.94062E-12 | KO | Gmppb        | 0.15  |
| Chd1l        | 6.27438E-17 | 0.822712272 | 0.172 | 0.03  | 1.94838E-12 | KO | Chd1l        | 0.142 |
| Dsn1         | 6.96431E-17 | 0.943591929 | 0.13  | 0.015 | 2.16263E-12 | KO | Dsn1         | 0.115 |
| Fancl        | 7.10175E-17 | 1.044653219 | 0.164 | 0.027 | 2.20531E-12 | KO | Fancl        | 0.137 |
| Slc20a2      | 8.08687E-17 | 1.160173722 | 0.113 | 0.011 | 2.51122E-12 | KO | Slc20a2      | 0.102 |
| Homer1       | 8.87414E-17 | 0.991072216 | 0.147 | 0.021 | 2.75569E-12 | KO | Homer1       | 0.126 |
| Tmsb15b1     | 9.06369E-17 | 1.176158052 | 0.126 | 0.014 | 2.81455E-12 | KO | Tmsb15b1     | 0.112 |
| 1500009L16Ri | 9.22735E-17 | 1.262250218 | 0.21  | 0.046 | 2.86537E-12 | KO | 1500009L16Ri | 0.164 |
| Gm17173      | 9.46293E-17 | 1.402681195 | 0.109 | 0.01  | 2.93852E-12 | KO | Gm17173      | 0.099 |
| Zbtb32       | 1.10672E-16 | 0.869462658 | 0.227 | 0.053 | 3.4367E-12  | KO | Zbtb32       | 0.174 |
| Cep76        | 1.11699E-16 | 0.761106756 | 0.109 | 0.01  | 3.46859E-12 | KO | Cep76        | 0.099 |
| Dcun1d3      | 1.25878E-16 | 0.82462331  | 0.134 | 0.017 | 3.9089E-12  | KO | Dcun1d3      | 0.117 |
| Isoc1        | 1.26519E-16 | 0.817457662 | 0.151 | 0.023 | 3.92878E-12 | KO | Isoc1        | 0.128 |
| Trp53inp2    | 1.35517E-16 | 1.956055519 | 0.105 | 0.009 | 4.20822E-12 | KO | Trp53inp2    | 0.096 |
| Itm2a        | 1.3983E-16  | 0.783956449 | 0.193 | 0.038 | 4.34215E-12 | KO | Itm2a        | 0.155 |
| Tmem237      | 1.53627E-16 | 0.803405464 | 0.134 | 0.017 | 4.77058E-12 | KO | Tmem237      | 0.117 |
| Zfp180       | 1.55443E-16 | 1.117444108 | 0.122 | 0.013 | 4.82698E-12 | KO | Zfp180       | 0.109 |
| Nipsnap1     | 1.58803E-16 | 0.883159413 | 0.16  | 0.026 | 4.9313E-12  | KO | Nipsnap1     | 0.134 |
| Smcr8        | 1.66582E-16 | 1.029234503 | 0.143 | 0.02  | 5.17287E-12 | KO | Smcr8        | 0.123 |
| Utp15        | 1.73224E-16 | 0.907323064 | 0.189 | 0.038 | 5.37914E-12 | KO | Utp15        | 0.151 |
| Tmem260      | 1.79218E-16 | 1.222324991 | 0.164 | 0.028 | 5.56524E-12 | KO | Tmem260      | 0.136 |
| Ice1         | 1.84632E-16 | 0.863608387 | 0.197 | 0.04  | 5.73336E-12 | KO | Ice1         | 0.157 |
| Slc35g1      | 1.98951E-16 | 0.784313418 | 0.164 | 0.028 | 6.17802E-12 | KO | Slc35g1      | 0.136 |
| Wdr92        | 2.15803E-16 | 0.771761208 | 0.13  | 0.016 | 6.70134E-12 | KO | Wdr92        | 0.114 |
| Slco4a1      | 2.18212E-16 | 1.085436944 | 0.139 | 0.019 | 6.77615E-12 | KO | Slco4a1      | 0.12  |
| Alg8         | 2.2831E-16  | 0.730687177 | 0.164 | 0.028 | 7.0897E-12  | KO | Alg8         | 0.136 |
| Grb7         | 2.41487E-16 | 1.870333671 | 0.084 | 0.004 | 7.49889E-12 | KO | Grb7         | 0.08  |

|              |             |             |       |       |             |    |              |       |
|--------------|-------------|-------------|-------|-------|-------------|----|--------------|-------|
| Zc3h10       | 2.58534E-16 | 1.178946536 | 0.118 | 0.013 | 8.02826E-12 | KO | Zc3h10       | 0.105 |
| Gale         | 2.6066E-16  | 0.725789486 | 0.155 | 0.025 | 8.09427E-12 | KO | Gale         | 0.13  |
| Haus8        | 2.80476E-16 | 0.931873836 | 0.155 | 0.025 | 8.70963E-12 | KO | Haus8        | 0.13  |
| Tmem131l     | 2.81587E-16 | 0.969019683 | 0.197 | 0.041 | 8.74413E-12 | KO | Tmem131l     | 0.156 |
| Hps5         | 2.89051E-16 | 0.745235616 | 0.139 | 0.019 | 8.9759E-12  | KO | Hps5         | 0.12  |
| Cdc6         | 3.08598E-16 | 0.927059658 | 0.139 | 0.019 | 9.58288E-12 | KO | Cdc6         | 0.12  |
| Tada3        | 3.16739E-16 | 0.694230487 | 0.189 | 0.038 | 9.83568E-12 | KO | Tada3        | 0.151 |
| Tbck         | 3.30112E-16 | 1.048552121 | 0.16  | 0.027 | 1.0251E-11  | KO | Tbck         | 0.133 |
| Hist3h2a     | 3.44048E-16 | 1.649190869 | 0.113 | 0.012 | 1.06837E-11 | KO | Hist3h2a     | 0.101 |
| Orc1         | 3.5157E-16  | 0.814458138 | 0.113 | 0.012 | 1.09173E-11 | KO | Orc1         | 0.101 |
| Cradd        | 3.71931E-16 | 1.14670732  | 0.126 | 0.015 | 1.15496E-11 | KO | Cradd        | 0.111 |
| Vps4a        | 3.78229E-16 | 0.983960317 | 0.181 | 0.035 | 1.17452E-11 | KO | Vps4a        | 0.146 |
| Tcf19        | 3.79424E-16 | 0.95049783  | 0.126 | 0.015 | 1.17823E-11 | KO | Tcf19        | 0.111 |
| Gm47415      | 3.94953E-16 | 3.106767257 | 0.063 | 0     | 1.22645E-11 | KO | Gm47415      | 0.063 |
| Cables2      | 4.10633E-16 | 0.720689073 | 0.16  | 0.027 | 1.27514E-11 | KO | Cables2      | 0.133 |
| Rmdn3        | 4.3944E-16  | 1.254178358 | 0.143 | 0.021 | 1.36459E-11 | KO | Rmdn3        | 0.122 |
| Chpf         | 4.4546E-16  | 0.824706206 | 0.151 | 0.024 | 1.38329E-11 | KO | Chpf         | 0.127 |
| Papolg       | 5.0103E-16  | 1.166520807 | 0.143 | 0.021 | 1.55585E-11 | KO | Papolg       | 0.122 |
| Hmgxb3       | 5.05679E-16 | 0.892610452 | 0.134 | 0.018 | 1.57029E-11 | KO | Hmgxb3       | 0.116 |
| Mrrf         | 5.20508E-16 | 1.448040369 | 0.122 | 0.014 | 1.61633E-11 | KO | Mrrf         | 0.108 |
| Abcg1        | 5.24694E-16 | 1.194987285 | 0.109 | 0.011 | 1.62933E-11 | KO | Abcg1        | 0.098 |
| Stn1         | 5.29021E-16 | 0.992780669 | 0.172 | 0.032 | 1.64277E-11 | KO | Stn1         | 0.14  |
| Tbrg4        | 5.42314E-16 | 0.868801719 | 0.218 | 0.051 | 1.68405E-11 | KO | Tbrg4        | 0.167 |
| Klf4         | 5.90785E-16 | 1.305902555 | 0.122 | 0.014 | 1.83457E-11 | KO | Klf4         | 0.108 |
| Exosc2       | 5.91867E-16 | 0.923537136 | 0.223 | 0.054 | 1.83793E-11 | KO | Exosc2       | 0.169 |
| Mki67        | 6.32252E-16 | 1.080459712 | 0.479 | 0.211 | 1.96333E-11 | KO | Mki67        | 0.268 |
| Tnip3        | 6.53948E-16 | 1.074212314 | 0.147 | 0.023 | 2.03071E-11 | KO | Tnip3        | 0.124 |
| Nup188       | 6.87418E-16 | 0.746426767 | 0.193 | 0.04  | 2.13464E-11 | KO | Nup188       | 0.153 |
| Zfp729b      | 7.44497E-16 | 1.260360297 | 0.105 | 0.01  | 2.31189E-11 | KO | Zfp729b      | 0.095 |
| Trim37       | 7.83569E-16 | 0.922907716 | 0.13  | 0.017 | 2.43322E-11 | KO | Trim37       | 0.113 |
| Fbxo25       | 7.84257E-16 | 1.675507334 | 0.118 | 0.013 | 2.43535E-11 | KO | Fbxo25       | 0.105 |
| E330009J07Ri | 8.15681E-16 | 0.845095249 | 0.181 | 0.036 | 2.53293E-11 | KO | E330009J07Ri | 0.145 |
| Ttc27        | 8.21966E-16 | 1.169722976 | 0.13  | 0.017 | 2.55245E-11 | KO | Ttc27        | 0.113 |
| Praf2        | 8.9551E-16  | 0.757955325 | 0.155 | 0.026 | 2.78083E-11 | KO | Praf2        | 0.129 |
| Abcd4        | 9.16209E-16 | 0.877838346 | 0.147 | 0.023 | 2.84511E-11 | KO | Abcd4        | 0.124 |
| Nrn1         | 9.24116E-16 | 1.081871719 | 0.433 | 0.178 | 2.86966E-11 | KO | Nrn1         | 0.255 |
| Tesk1        | 9.90198E-16 | 0.746574454 | 0.172 | 0.033 | 3.07486E-11 | KO | Tesk1        | 0.139 |
| Cyb561d1     | 9.97352E-16 | 1.537756416 | 0.101 | 0.009 | 3.09708E-11 | KO | Cyb561d1     | 0.092 |
| Tsen54       | 1.05949E-15 | 0.867726695 | 0.139 | 0.02  | 3.29003E-11 | KO | Tsen54       | 0.119 |
| Ddx19b       | 1.06621E-15 | 0.82896216  | 0.172 | 0.033 | 3.31091E-11 | KO | Ddx19b       | 0.139 |
| Naf1         | 1.26376E-15 | 0.765440781 | 0.151 | 0.025 | 3.92437E-11 | KO | Naf1         | 0.126 |
| Nek6         | 1.34311E-15 | 0.926949424 | 0.126 | 0.016 | 4.17076E-11 | KO | Nek6         | 0.11  |
| Ms4a4c       | 1.51704E-15 | 1.363812542 | 0.176 | 0.036 | 4.71088E-11 | KO | Ms4a4c       | 0.14  |
| Rad51ap1     | 1.56006E-15 | 0.823272701 | 0.202 | 0.045 | 4.84445E-11 | KO | Rad51ap1     | 0.157 |
| Senp7        | 1.59517E-15 | 0.779312362 | 0.176 | 0.035 | 4.95348E-11 | KO | Senp7        | 0.141 |
| Mier3        | 1.60002E-15 | 0.861009388 | 0.134 | 0.019 | 4.96855E-11 | KO | Mier3        | 0.115 |
| Hic2         | 1.74221E-15 | 2.198202172 | 0.092 | 0.007 | 5.41008E-11 | KO | Hic2         | 0.085 |
| Gtf2h4       | 1.77453E-15 | 1.057827417 | 0.155 | 0.027 | 5.51045E-11 | KO | Gtf2h4       | 0.128 |
| Adck1        | 2.10907E-15 | 1.86445669  | 0.122 | 0.015 | 6.54929E-11 | KO | Adck1        | 0.107 |
| Atrn         | 2.34305E-15 | 0.854462315 | 0.168 | 0.032 | 7.27588E-11 | KO | Atrn         | 0.136 |
| Plscr4       | 2.40438E-15 | 1.632320867 | 0.08  | 0.004 | 7.46631E-11 | KO | Plscr4       | 0.076 |

|             |             |             |       |       |             |    |             |       |
|-------------|-------------|-------------|-------|-------|-------------|----|-------------|-------|
| Pcgf6       | 2.40604E-15 | 1.384584733 | 0.139 | 0.021 | 7.47146E-11 | KO | Pcgf6       | 0.118 |
| Mettl4      | 2.57137E-15 | 0.809200528 | 0.109 | 0.012 | 7.98488E-11 | KO | Mettl4      | 0.097 |
| Znfx1       | 2.59885E-15 | 1.017008361 | 0.109 | 0.012 | 8.07021E-11 | KO | Znfx1       | 0.097 |
| Rfc4        | 2.90941E-15 | 0.735365326 | 0.303 | 0.092 | 9.03458E-11 | KO | Rfc4        | 0.211 |
| Stmn1       | 2.92863E-15 | 1.217662523 | 0.584 | 0.32  | 9.09428E-11 | KO | Stmn1       | 0.264 |
| Slc16a11    | 3.00626E-15 | 0.724181255 | 0.244 | 0.064 | 9.33535E-11 | KO | Slc16a11    | 0.18  |
| 1700048O20R | 3.15734E-15 | 1.555952785 | 0.118 | 0.014 | 9.80448E-11 | KO | 1700048O20R | 0.104 |
| Sema6d      | 3.18683E-15 | 0.982054762 | 0.164 | 0.031 | 9.89605E-11 | KO | Sema6d      | 0.133 |
| Ccdc66      | 3.60485E-15 | 1.029823389 | 0.151 | 0.026 | 1.11941E-10 | KO | Ccdc66      | 0.125 |
| Pvrig       | 3.81202E-15 | 2.118704015 | 0.059 | 0     | 1.18375E-10 | KO | Pvrig       | 0.059 |
| Vps37c      | 3.99032E-15 | 0.735533094 | 0.118 | 0.014 | 1.23912E-10 | KO | Vps37c      | 0.104 |
| Zdhhc16     | 4.25838E-15 | 0.719617591 | 0.181 | 0.038 | 1.32236E-10 | KO | Zdhhc16     | 0.143 |
| Tspan5      | 4.43804E-15 | 0.814311092 | 0.134 | 0.02  | 1.37814E-10 | KO | Tspan5      | 0.114 |
| Dhfr        | 4.67217E-15 | 0.872008119 | 0.252 | 0.069 | 1.45085E-10 | KO | Dhfr        | 0.183 |
| Rrp12       | 4.918E-15   | 1.387748463 | 0.113 | 0.013 | 1.52719E-10 | KO | Rrp12       | 0.1   |
| Klf11       | 5.19989E-15 | 1.178514593 | 0.101 | 0.01  | 1.61472E-10 | KO | Klf11       | 0.091 |
| Elac2       | 5.22348E-15 | 0.80539212  | 0.16  | 0.03  | 1.62205E-10 | KO | Elac2       | 0.13  |
| Ccdc92      | 5.35262E-15 | 0.888908417 | 0.155 | 0.028 | 1.66215E-10 | KO | Ccdc92      | 0.127 |
| Slc25a10    | 5.46609E-15 | 1.364467554 | 0.101 | 0.01  | 1.69739E-10 | KO | Slc25a10    | 0.091 |
| Ociad2      | 5.53831E-15 | 1.037780395 | 0.147 | 0.025 | 1.71981E-10 | KO | Ociad2      | 0.122 |
| Pofut1      | 5.95891E-15 | 0.941219639 | 0.172 | 0.035 | 1.85042E-10 | KO | Pofut1      | 0.137 |
| Cdk5        | 6.13014E-15 | 0.920546223 | 0.181 | 0.038 | 1.90359E-10 | KO | Cdk5        | 0.143 |
| Gar1        | 6.39593E-15 | 0.907361278 | 0.319 | 0.103 | 1.98613E-10 | KO | Gar1        | 0.216 |
| Abcc1       | 6.43137E-15 | 0.799858583 | 0.227 | 0.058 | 1.99713E-10 | KO | Abcc1       | 0.169 |
| Zfp938      | 6.93708E-15 | 1.09062028  | 0.113 | 0.013 | 2.15417E-10 | KO | Zfp938      | 0.1   |
| Nbn         | 8.0485E-15  | 1.026627611 | 0.097 | 0.009 | 2.4993E-10  | KO | Nbn         | 0.088 |
| Tmem68      | 8.23322E-15 | 0.892535164 | 0.13  | 0.019 | 2.55666E-10 | KO | Tmem68      | 0.111 |
| Trim30d     | 8.53691E-15 | 1.517836918 | 0.13  | 0.019 | 2.65097E-10 | KO | Trim30d     | 0.111 |
| Mrps2       | 9.40832E-15 | 0.861451709 | 0.139 | 0.022 | 2.92156E-10 | KO | Mrps2       | 0.117 |
| Zbtb14      | 9.54739E-15 | 1.400718869 | 0.109 | 0.013 | 2.96475E-10 | KO | Zbtb14      | 0.096 |
| 2410004B18R | 9.6943E-15  | 0.837029842 | 0.168 | 0.034 | 3.01037E-10 | KO | 2410004B18R | 0.134 |
| Bcl6        | 1.0223E-14  | 1.518176627 | 0.092 | 0.008 | 3.17454E-10 | KO | Bcl6        | 0.084 |
| Gins1       | 1.03907E-14 | 0.772765632 | 0.139 | 0.022 | 3.22662E-10 | KO | Gins1       | 0.117 |
| 2810006K23R | 1.04644E-14 | 1.436472815 | 0.092 | 0.008 | 3.24951E-10 | KO | 2810006K23R | 0.084 |
| Pfkm        | 1.13688E-14 | 0.809346845 | 0.109 | 0.013 | 3.53034E-10 | KO | Pfkm        | 0.096 |
| Tuba1b      | 1.16938E-14 | 0.997356222 | 0.672 | 0.369 | 3.63127E-10 | KO | Tuba1b      | 0.303 |
| 2700097O09R | 1.40944E-14 | 0.937653516 | 0.134 | 0.021 | 4.37672E-10 | KO | 2700097O09R | 0.113 |
| Slc25a45    | 1.43274E-14 | 1.807124476 | 0.105 | 0.012 | 4.44907E-10 | KO | Slc25a45    | 0.093 |
| Cenpn       | 1.43354E-14 | 1.021268595 | 0.118 | 0.015 | 4.45157E-10 | KO | Cenpn       | 0.103 |
| Mtmr9       | 1.45319E-14 | 0.883787739 | 0.134 | 0.021 | 4.51261E-10 | KO | Mtmr9       | 0.113 |
| Pogz        | 1.46963E-14 | 0.908980244 | 0.168 | 0.034 | 4.56365E-10 | KO | Pogz        | 0.134 |
| Rasd2       | 1.49419E-14 | 1.226478312 | 0.088 | 0.007 | 4.6399E-10  | KO | Rasd2       | 0.081 |
| Dars2       | 1.5098E-14  | 1.892220629 | 0.105 | 0.012 | 4.68838E-10 | KO | Dars2       | 0.093 |
| Gm4707      | 1.52618E-14 | 0.716559159 | 0.118 | 0.015 | 4.73926E-10 | KO | Gm4707      | 0.103 |
| Rhebl1      | 1.5337E-14  | 1.262078592 | 0.105 | 0.012 | 4.76261E-10 | KO | Rhebl1      | 0.093 |
| Hist1h2ac   | 1.54976E-14 | 1.467932267 | 0.126 | 0.018 | 4.81248E-10 | KO | Hist1h2ac   | 0.108 |
| Rab3d       | 1.54985E-14 | 1.539440808 | 0.105 | 0.012 | 4.81274E-10 | KO | Rab3d       | 0.093 |
| Rnf41       | 1.62471E-14 | 0.696498456 | 0.118 | 0.015 | 5.04522E-10 | KO | Rnf41       | 0.103 |
| Stk35       | 1.64832E-14 | 0.787951892 | 0.118 | 0.015 | 5.11854E-10 | KO | Stk35       | 0.103 |
| Elmod2      | 1.6749E-14  | 0.879294795 | 0.126 | 0.018 | 5.20105E-10 | KO | Elmod2      | 0.108 |
| Mt3         | 1.71067E-14 | 0.705563166 | 0.176 | 0.038 | 5.31214E-10 | KO | Mt3         | 0.138 |

|             |             |             |       |       |             |    |             |       |
|-------------|-------------|-------------|-------|-------|-------------|----|-------------|-------|
| Galns       | 1.72139E-14 | 0.894769141 | 0.126 | 0.018 | 5.34544E-10 | KO | Galns       | 0.108 |
| Ptpn3       | 1.73314E-14 | 1.362934804 | 0.084 | 0.006 | 5.38191E-10 | KO | Ptpn3       | 0.078 |
| Tbc1d13     | 1.77724E-14 | 0.771050441 | 0.126 | 0.018 | 5.51887E-10 | KO | Tbc1d13     | 0.108 |
| D630039A03R | 1.93268E-14 | 1.851005512 | 0.08  | 0.005 | 6.00155E-10 | KO | D630039A03R | 0.075 |
| Gm20069     | 1.9442E-14  | 1.720111432 | 0.076 | 0.004 | 6.03732E-10 | KO | Gm20069     | 0.072 |
| Nek4        | 1.97052E-14 | 1.367589039 | 0.076 | 0.004 | 6.11906E-10 | KO | Nek4        | 0.072 |
| Slc25a32    | 2.21218E-14 | 1.190808766 | 0.13  | 0.02  | 6.86949E-10 | KO | Slc25a32    | 0.11  |
| Spred2      | 2.44872E-14 | 1.123753573 | 0.122 | 0.017 | 7.60401E-10 | KO | Spred2      | 0.105 |
| Ercc6l      | 2.60142E-14 | 0.725361837 | 0.101 | 0.011 | 8.0782E-10  | KO | Ercc6l      | 0.09  |
| Nek1        | 2.62931E-14 | 1.006264834 | 0.101 | 0.011 | 8.16481E-10 | KO | Nek1        | 0.09  |
| Ric8b       | 2.63596E-14 | 0.701753435 | 0.113 | 0.014 | 8.18544E-10 | KO | Ric8b       | 0.099 |
| Xpnpep3     | 2.6717E-14  | 0.838325948 | 0.101 | 0.011 | 8.29644E-10 | KO | Xpnpep3     | 0.09  |
| Pot1b       | 2.72927E-14 | 1.043372948 | 0.101 | 0.011 | 8.47521E-10 | KO | Pot1b       | 0.09  |
| BC030867    | 2.80853E-14 | 0.806757113 | 0.113 | 0.014 | 8.72133E-10 | KO | BC030867    | 0.099 |
| Slc41a1     | 2.83146E-14 | 0.869677235 | 0.13  | 0.02  | 8.79253E-10 | KO | Slc41a1     | 0.11  |
| Ttc7b       | 3.53666E-14 | 0.988019607 | 0.155 | 0.03  | 1.09824E-09 | KO | Ttc7b       | 0.125 |
| Gm156       | 3.67531E-14 | 4.049669143 | 0.055 | 0     | 1.14129E-09 | KO | Gm156       | 0.055 |
| Retnla      | 3.67531E-14 | 3.758888346 | 0.055 | 0     | 1.14129E-09 | KO | Retnla      | 0.055 |
| Ogg1        | 3.68868E-14 | 0.941551663 | 0.097 | 0.01  | 1.14545E-09 | KO | Ogg1        | 0.087 |
| Xxylt1      | 3.9793E-14  | 1.451000816 | 0.109 | 0.013 | 1.23569E-09 | KO | Xxylt1      | 0.096 |
| Als2        | 4.00304E-14 | 1.421534254 | 0.097 | 0.01  | 1.24306E-09 | KO | Als2        | 0.087 |
| Zdhhc15     | 4.27337E-14 | 0.831685321 | 0.097 | 0.01  | 1.32701E-09 | KO | Zdhhc15     | 0.087 |
| Cenpi       | 4.42141E-14 | 1.572823678 | 0.134 | 0.022 | 1.37298E-09 | KO | Cenpi       | 0.112 |
| Gprin3      | 4.61523E-14 | 1.086037351 | 0.164 | 0.034 | 1.43317E-09 | KO | Gprin3      | 0.13  |
| Tmem39b     | 4.95145E-14 | 1.537185648 | 0.147 | 0.027 | 1.53757E-09 | KO | Tmem39b     | 0.12  |
| Zfp426      | 5.27134E-14 | 0.813813191 | 0.118 | 0.016 | 1.63691E-09 | KO | Zfp426      | 0.102 |
| Clgn        | 5.65845E-14 | 1.335618225 | 0.092 | 0.009 | 1.75712E-09 | KO | Clgn        | 0.083 |
| Hspa1a      | 5.67255E-14 | 1.022494413 | 0.252 | 0.075 | 1.7615E-09  | KO | Hspa1a      | 0.177 |
| Eme1        | 5.78625E-14 | 1.117401674 | 0.092 | 0.009 | 1.79681E-09 | KO | Eme1        | 0.083 |
| Invs        | 5.81864E-14 | 1.491979874 | 0.092 | 0.009 | 1.80686E-09 | KO | Invs        | 0.083 |
| Ksr1        | 5.90674E-14 | 1.104626817 | 0.105 | 0.013 | 1.83422E-09 | KO | Ksr1        | 0.092 |
| Rps6ka5     | 6.70145E-14 | 1.261786436 | 0.105 | 0.013 | 2.081E-09   | KO | Rps6ka5     | 0.092 |
| 1700096K18R | 6.80361E-14 | 1.371198851 | 0.105 | 0.013 | 2.11273E-09 | KO | 1700096K18R | 0.092 |
| Rbm19       | 6.86794E-14 | 0.718621469 | 0.139 | 0.024 | 2.1327E-09  | KO | Rbm19       | 0.115 |
| Filip1      | 7.26091E-14 | 0.888240825 | 0.143 | 0.026 | 2.25473E-09 | KO | Filip1      | 0.117 |
| Calca       | 8.27391E-14 | 1.684880778 | 0.059 | 0.001 | 2.5693E-09  | KO | Calca       | 0.058 |
| Pogk        | 8.44442E-14 | 0.808970256 | 0.113 | 0.015 | 2.62225E-09 | KO | Pogk        | 0.098 |
| Dhx32       | 9.10818E-14 | 0.826862954 | 0.113 | 0.015 | 2.82836E-09 | KO | Dhx32       | 0.098 |
| Dnajb14     | 9.40135E-14 | 0.760193897 | 0.13  | 0.021 | 2.9194E-09  | KO | Dnajb14     | 0.109 |
| Rasgef1b    | 1.05942E-13 | 1.484530223 | 0.084 | 0.007 | 3.28982E-09 | KO | Rasgef1b    | 0.077 |
| Plxdc2      | 1.08901E-13 | 1.396369948 | 0.101 | 0.012 | 3.38169E-09 | KO | Plxdc2      | 0.089 |
| Cep170b     | 1.17615E-13 | 0.783536315 | 0.101 | 0.012 | 3.65229E-09 | KO | Cep170b     | 0.089 |
| Ago1        | 1.18354E-13 | 0.740492431 | 0.147 | 0.028 | 3.67525E-09 | KO | Ago1        | 0.119 |
| Alg2        | 1.20052E-13 | 0.704540939 | 0.101 | 0.012 | 3.72797E-09 | KO | Alg2        | 0.089 |
| Tmc8        | 1.2984E-13  | 1.779892352 | 0.08  | 0.006 | 4.03191E-09 | KO | Tmc8        | 0.074 |
| Sema7a      | 1.34722E-13 | 0.802828535 | 0.134 | 0.023 | 4.18352E-09 | KO | Sema7a      | 0.111 |
| Bcl7a       | 1.38613E-13 | 2.830340042 | 0.076 | 0.005 | 4.30435E-09 | KO | Bcl7a       | 0.071 |
| Rida        | 1.40407E-13 | 0.732064833 | 0.134 | 0.023 | 4.36006E-09 | KO | Rida        | 0.111 |
| Mier2       | 1.41763E-13 | 1.594640696 | 0.109 | 0.014 | 4.40216E-09 | KO | Mier2       | 0.095 |
| Socs2       | 1.43301E-13 | 1.360594744 | 0.118 | 0.017 | 4.44992E-09 | KO | Socs2       | 0.101 |
| Parp11      | 1.49953E-13 | 1.14143521  | 0.118 | 0.017 | 4.65648E-09 | KO | Parp11      | 0.101 |

|             |             |             |       |       |             |    |             |       |
|-------------|-------------|-------------|-------|-------|-------------|----|-------------|-------|
| Zfp950      | 1.5178E-13  | 0.768997643 | 0.176 | 0.04  | 4.71323E-09 | KO | Zfp950      | 0.136 |
| Edrf1       | 1.53081E-13 | 0.833140418 | 0.126 | 0.02  | 4.75364E-09 | KO | Edrf1       | 0.106 |
| Aplp1       | 1.58412E-13 | 1.495148127 | 0.076 | 0.005 | 4.91917E-09 | KO | Aplp1       | 0.071 |
| C230024C17R | 1.59421E-13 | 1.675771793 | 0.076 | 0.005 | 4.9505E-09  | KO | C230024C17R | 0.071 |
| Slc35b4     | 1.63438E-13 | 1.207099788 | 0.118 | 0.017 | 5.07524E-09 | KO | Slc35b4     | 0.101 |
| Igf2bp2     | 1.6434E-13  | 1.908088921 | 0.067 | 0.003 | 5.10324E-09 | KO | Igf2bp2     | 0.064 |
| Dis3l       | 1.64357E-13 | 0.848743271 | 0.097 | 0.011 | 5.10379E-09 | KO | Dis3l       | 0.086 |
| Pdp1        | 1.65655E-13 | 1.348264738 | 0.097 | 0.011 | 5.14409E-09 | KO | Pdp1        | 0.086 |
| Trim68      | 1.66647E-13 | 1.313890043 | 0.067 | 0.003 | 5.17488E-09 | KO | Trim68      | 0.064 |
| Dlg2        | 1.66664E-13 | 1.209289579 | 0.076 | 0.005 | 5.17541E-09 | KO | Dlg2        | 0.071 |
| B3galt5     | 1.76663E-13 | 1.070257404 | 0.071 | 0.004 | 5.48592E-09 | KO | B3galt5     | 0.067 |
| Rab43       | 1.7892E-13  | 0.854081728 | 0.118 | 0.017 | 5.556E-09   | KO | Rab43       | 0.101 |
| Ccna2       | 1.91932E-13 | 0.954789267 | 0.319 | 0.115 | 5.96006E-09 | KO | Ccna2       | 0.204 |
| 2310031A07R | 1.94036E-13 | 0.823152109 | 0.168 | 0.038 | 6.02539E-09 | KO | 2310031A07R | 0.13  |
| Riox1       | 2.21846E-13 | 1.19378626  | 0.13  | 0.022 | 6.88898E-09 | KO | Riox1       | 0.108 |
| Arhgap19    | 2.4383E-13  | 0.96104431  | 0.122 | 0.019 | 7.57165E-09 | KO | Arhgap19    | 0.103 |
| Capn10      | 2.6073E-13  | 1.482898167 | 0.092 | 0.01  | 8.09645E-09 | KO | Capn10      | 0.082 |
| Osgin1      | 2.63321E-13 | 0.891288099 | 0.105 | 0.013 | 8.17691E-09 | KO | Osgin1      | 0.092 |
| Tnfsf11     | 3.23904E-13 | 1.568336682 | 0.143 | 0.028 | 1.00582E-08 | KO | Tnfsf11     | 0.115 |
| Rfx5        | 3.52498E-13 | 0.752831009 | 0.113 | 0.016 | 1.09461E-08 | KO | Rfx5        | 0.097 |
| Tmem140     | 3.80119E-13 | 1.613966565 | 0.088 | 0.009 | 1.18038E-08 | KO | Tmem140     | 0.079 |
| Pef1        | 3.81729E-13 | 0.860461297 | 0.151 | 0.031 | 1.18538E-08 | KO | Pef1        | 0.12  |
| Naaa        | 3.97178E-13 | 1.628211765 | 0.088 | 0.009 | 1.23336E-08 | KO | Naaa        | 0.079 |
| Timmdc1     | 4.18448E-13 | 0.741846901 | 0.126 | 0.021 | 1.29941E-08 | KO | Timmdc1     | 0.105 |
| Zfp760      | 4.21869E-13 | 1.003783142 | 0.088 | 0.009 | 1.31003E-08 | KO | Zfp760      | 0.079 |
| Slc39a11    | 4.54457E-13 | 1.118272501 | 0.101 | 0.013 | 1.41122E-08 | KO | Slc39a11    | 0.088 |
| Mettl14     | 4.55821E-13 | 0.752095205 | 0.151 | 0.031 | 1.41546E-08 | KO | Mettl14     | 0.12  |
| Filip1l     | 4.62775E-13 | 0.727690346 | 0.126 | 0.021 | 1.43705E-08 | KO | Filip1l     | 0.105 |
| Med26       | 4.72774E-13 | 0.712697739 | 0.101 | 0.013 | 1.46811E-08 | KO | Med26       | 0.088 |
| Pacsin1     | 5.38089E-13 | 1.557510681 | 0.122 | 0.02  | 1.67093E-08 | KO | Pacsin1     | 0.102 |
| Prdm10      | 5.49847E-13 | 2.101867224 | 0.084 | 0.008 | 1.70744E-08 | KO | Prdm10      | 0.076 |
| Simc1       | 5.75216E-13 | 1.495552486 | 0.084 | 0.008 | 1.78622E-08 | KO | Simc1       | 0.076 |
| Mrm1        | 5.81735E-13 | 1.282667977 | 0.084 | 0.008 | 1.80646E-08 | KO | Mrm1        | 0.076 |
| Gm42670     | 5.81735E-13 | 0.959135179 | 0.084 | 0.008 | 1.80646E-08 | KO | Gm42670     | 0.076 |
| Ildr1       | 5.86396E-13 | 0.826560703 | 0.118 | 0.018 | 1.82093E-08 | KO | Ildr1       | 0.1   |
| Syvn1       | 6.00607E-13 | 0.817724898 | 0.139 | 0.026 | 1.86507E-08 | KO | Syvn1       | 0.113 |
| Crim1       | 6.23237E-13 | 1.675227478 | 0.097 | 0.012 | 1.93534E-08 | KO | Crim1       | 0.085 |
| Pxmp2       | 6.27921E-13 | 0.694872557 | 0.143 | 0.028 | 1.94988E-08 | KO | Pxmp2       | 0.115 |
| Ltb4r1      | 7.10538E-13 | 2.469228411 | 0.08  | 0.007 | 2.20643E-08 | KO | Ltb4r1      | 0.073 |
| Taf5        | 7.59919E-13 | 0.695702333 | 0.151 | 0.032 | 2.35978E-08 | KO | Taf5        | 0.119 |
| Bdh2        | 7.71875E-13 | 3.218573136 | 0.055 | 0.001 | 2.3969E-08  | KO | Bdh2        | 0.054 |
| Ahcy        | 7.76306E-13 | 0.923101325 | 0.113 | 0.017 | 2.41066E-08 | KO | Ahcy        | 0.096 |
| Ppm1f       | 7.98491E-13 | 0.838842271 | 0.122 | 0.02  | 2.47955E-08 | KO | Ppm1f       | 0.102 |
| Pclaf       | 8.05182E-13 | 1.019833143 | 0.445 | 0.211 | 2.50033E-08 | KO | Pclaf       | 0.234 |
| Aaed1       | 8.07467E-13 | 1.078374259 | 0.105 | 0.014 | 2.50743E-08 | KO | Aaed1       | 0.091 |
| Cep57l1     | 9.10192E-13 | 0.804278763 | 0.122 | 0.02  | 2.82642E-08 | KO | Cep57l1     | 0.102 |
| Lrr1        | 9.34171E-13 | 1.054393425 | 0.105 | 0.014 | 2.90088E-08 | KO | Lrr1        | 0.091 |
| Supt7l      | 9.34171E-13 | 0.897074903 | 0.105 | 0.014 | 2.90088E-08 | KO | Supt7l      | 0.091 |
| Myo18a      | 9.46154E-13 | 0.845832722 | 0.134 | 0.025 | 2.93809E-08 | KO | Myo18a      | 0.109 |
| Mknk1       | 9.71021E-13 | 0.789711619 | 0.126 | 0.022 | 3.01531E-08 | KO | Mknk1       | 0.104 |
| Acot2       | 9.77994E-13 | 0.934157135 | 0.113 | 0.017 | 3.03697E-08 | KO | Acot2       | 0.096 |

|             |             |             |       |       |             |    |             |       |
|-------------|-------------|-------------|-------|-------|-------------|----|-------------|-------|
| Gm20342     | 1.02683E-12 | 1.19151062  | 0.118 | 0.019 | 3.1886E-08  | KO | Gm20342     | 0.099 |
| Pwwp2b      | 1.08802E-12 | 1.464038085 | 0.076 | 0.006 | 3.37862E-08 | KO | Pwwp2b      | 0.07  |
| Rcc1l       | 1.10306E-12 | 0.746547232 | 0.143 | 0.029 | 3.42534E-08 | KO | Rcc1l       | 0.114 |
| Socs5       | 1.12793E-12 | 1.4007068   | 0.076 | 0.006 | 3.50257E-08 | KO | Socs5       | 0.07  |
| Ckap2       | 1.16021E-12 | 1.052866529 | 0.218 | 0.062 | 3.6028E-08  | KO | Ckap2       | 0.156 |
| Evi2        | 1.19194E-12 | 1.80274859  | 0.059 | 0.002 | 3.70133E-08 | KO | Evi2        | 0.057 |
| Cenpf       | 1.19333E-12 | 0.78742781  | 0.311 | 0.114 | 3.70565E-08 | KO | Cenpf       | 0.197 |
| Smyd1       | 1.21755E-12 | 2.183514813 | 0.071 | 0.005 | 3.78085E-08 | KO | Smyd1       | 0.066 |
| Agbl5       | 1.22607E-12 | 0.906146171 | 0.092 | 0.011 | 3.80733E-08 | KO | Agbl5       | 0.081 |
| Ccnyl1      | 1.2641E-12  | 2.522799915 | 0.071 | 0.005 | 3.9254E-08  | KO | Ccnyl1      | 0.066 |
| Tsga10      | 1.28802E-12 | 1.568827612 | 0.071 | 0.005 | 3.9997E-08  | KO | Tsga10      | 0.066 |
| Enox2       | 1.31239E-12 | 0.845172314 | 0.071 | 0.005 | 4.07538E-08 | KO | Enox2       | 0.066 |
| Hdac10      | 1.32062E-12 | 1.515669438 | 0.071 | 0.005 | 4.10091E-08 | KO | Hdac10      | 0.066 |
| Chrne       | 1.34559E-12 | 1.542451666 | 0.071 | 0.005 | 4.17847E-08 | KO | Chrne       | 0.066 |
| Dab2ip      | 1.34559E-12 | 1.431365268 | 0.071 | 0.005 | 4.17847E-08 | KO | Dab2ip      | 0.066 |
| Ltf         | 1.35005E-12 | 2.974544234 | 0.063 | 0.003 | 4.19232E-08 | KO | Ltf         | 0.06  |
| Tmem35b     | 1.35939E-12 | 2.860890272 | 0.063 | 0.003 | 4.22131E-08 | KO | Tmem35b     | 0.06  |
| Gm20045     | 1.44466E-12 | 2.032286263 | 0.067 | 0.004 | 4.4861E-08  | KO | Gm20045     | 0.063 |
| Acyp2       | 1.49263E-12 | 0.835386074 | 0.067 | 0.004 | 4.63506E-08 | KO | Acyp2       | 0.063 |
| Galm        | 1.50241E-12 | 1.412855303 | 0.067 | 0.004 | 4.66542E-08 | KO | Galm        | 0.063 |
| Ltk         | 1.50241E-12 | 1.324507251 | 0.067 | 0.004 | 4.66542E-08 | KO | Ltk         | 0.063 |
| Kif3c       | 1.50241E-12 | 1.011464487 | 0.067 | 0.004 | 4.66542E-08 | KO | Kif3c       | 0.063 |
| Alg6        | 1.6121E-12  | 1.135325575 | 0.101 | 0.013 | 5.00605E-08 | KO | Alg6        | 0.088 |
| Marveld1    | 1.6121E-12  | 1.069696961 | 0.101 | 0.013 | 5.00605E-08 | KO | Marveld1    | 0.088 |
| Noct        | 1.64267E-12 | 0.829108497 | 0.151 | 0.033 | 5.101E-08   | KO | Noct        | 0.118 |
| Rad54b      | 1.6988E-12  | 0.699026584 | 0.101 | 0.013 | 5.27529E-08 | KO | Rad54b      | 0.088 |
| Ano8        | 1.84141E-12 | 1.191687795 | 0.088 | 0.01  | 5.71812E-08 | KO | Ano8        | 0.078 |
| Btd         | 1.84141E-12 | 0.842013295 | 0.088 | 0.01  | 5.71812E-08 | KO | Btd         | 0.078 |
| Pigq        | 1.9468E-12  | 0.881607824 | 0.147 | 0.031 | 6.0454E-08  | KO | Pigq        | 0.116 |
| Slc29a3     | 2.03665E-12 | 1.39077569  | 0.122 | 0.021 | 6.32441E-08 | KO | Slc29a3     | 0.101 |
| Ccdc102a    | 2.22949E-12 | 0.919822246 | 0.122 | 0.021 | 6.92324E-08 | KO | Ccdc102a    | 0.101 |
| Pus7        | 2.36557E-12 | 0.898020846 | 0.113 | 0.018 | 7.34579E-08 | KO | Pus7        | 0.095 |
| Gpt         | 2.77664E-12 | 1.242864198 | 0.084 | 0.009 | 8.62229E-08 | KO | Gpt         | 0.075 |
| Cyp4v3      | 2.8523E-12  | 1.121990748 | 0.084 | 0.009 | 8.85725E-08 | KO | Cyp4v3      | 0.075 |
| Ttc38       | 2.94577E-12 | 0.913691709 | 0.084 | 0.009 | 9.14751E-08 | KO | Ttc38       | 0.075 |
| Btbd6       | 2.96164E-12 | 1.147786077 | 0.084 | 0.009 | 9.19678E-08 | KO | Btbd6       | 0.075 |
| Cdon        | 3.14281E-12 | 0.788913335 | 0.105 | 0.015 | 9.75937E-08 | KO | Cdon        | 0.09  |
| Tfb2m       | 3.3747E-12  | 1.017551075 | 0.118 | 0.02  | 1.04795E-07 | KO | Tfb2m       | 0.098 |
| Dynlt1c     | 3.41082E-12 | 2.266060678 | 0.046 | 0     | 1.05916E-07 | KO | Dynlt1c     | 0.046 |
| Tbc1d4      | 3.53712E-12 | 1.372343324 | 0.122 | 0.022 | 1.09838E-07 | KO | Tbc1d4      | 0.1   |
| Mturn       | 4.32831E-12 | 0.828631158 | 0.08  | 0.008 | 1.34407E-07 | KO | Mturn       | 0.072 |
| Fancc       | 4.44017E-12 | 0.888070068 | 0.092 | 0.012 | 1.37881E-07 | KO | Fancc       | 0.08  |
| Cstad       | 4.44944E-12 | 0.792707986 | 0.08  | 0.008 | 1.38168E-07 | KO | Cstad       | 0.072 |
| Tspyl3      | 4.66347E-12 | 0.713044528 | 0.109 | 0.017 | 1.44815E-07 | KO | Tspyl3      | 0.092 |
| 2900093K20R | 4.82816E-12 | 1.339784521 | 0.092 | 0.012 | 1.49929E-07 | KO | 2900093K20R | 0.08  |
| Sirt1       | 5.36443E-12 | 0.699632445 | 0.151 | 0.034 | 1.66582E-07 | KO | Sirt1       | 0.117 |
| Zdhhc9      | 5.40533E-12 | 1.260650941 | 0.109 | 0.017 | 1.67852E-07 | KO | Zdhhc9      | 0.092 |
| Spef1       | 6.21077E-12 | 1.316605324 | 0.076 | 0.007 | 1.92863E-07 | KO | Spef1       | 0.069 |
| Nmral1      | 6.63788E-12 | 0.876415701 | 0.122 | 0.022 | 2.06126E-07 | KO | Nmral1      | 0.1   |
| Raver1      | 7.41256E-12 | 2.177766218 | 0.05  | 0.001 | 2.30182E-07 | KO | Raver1      | 0.049 |
| Sept2       | 7.47825E-12 | 1.010340583 | 0.088 | 0.011 | 2.32222E-07 | KO | Sept2       | 0.077 |



|             |             |             |       |       |             |    |             |       |
|-------------|-------------|-------------|-------|-------|-------------|----|-------------|-------|
| Tmem171     | 7.66855E-12 | 1.183295447 | 0.088 | 0.011 | 2.38132E-07 | KO | Tmem171     | 0.077 |
| Nrros       | 7.70522E-12 | 1.23042303  | 0.151 | 0.035 | 2.3927E-07  | KO | Nrros       | 0.116 |
| Fam83d      | 7.76668E-12 | 0.970693859 | 0.097 | 0.013 | 2.41179E-07 | KO | Fam83d      | 0.084 |
| Pi4kb       | 8.02008E-12 | 0.772998923 | 0.113 | 0.019 | 2.49047E-07 | KO | Pi4kb       | 0.094 |
| Mtrr        | 8.02008E-12 | 0.694970195 | 0.113 | 0.019 | 2.49047E-07 | KO | Mtrr        | 0.094 |
| Ccsap       | 8.14487E-12 | 0.69420398  | 0.088 | 0.011 | 2.52923E-07 | KO | Ccsap       | 0.077 |
| Poc5        | 8.66688E-12 | 0.968149938 | 0.105 | 0.016 | 2.69133E-07 | KO | Poc5        | 0.089 |
| Mex3b       | 8.67427E-12 | 0.697289978 | 0.071 | 0.006 | 2.69362E-07 | KO | Mex3b       | 0.065 |
| Abhd17c     | 8.67696E-12 | 0.845231934 | 0.13  | 0.026 | 2.69446E-07 | KO | Abhd17c     | 0.104 |
| Kn1         | 1.02085E-11 | 0.870492952 | 0.248 | 0.083 | 3.17005E-07 | KO | Kn1         | 0.165 |
| Rad51b      | 1.03731E-11 | 0.710587029 | 0.097 | 0.013 | 3.22115E-07 | KO | Rad51b      | 0.084 |
| Gm17767     | 1.03844E-11 | 2.42863086  | 0.055 | 0.002 | 3.22466E-07 | KO | Gm17767     | 0.053 |
| Arc         | 1.15161E-11 | 2.381537423 | 0.063 | 0.004 | 3.57609E-07 | KO | Arc         | 0.059 |
| Zfp825      | 1.15689E-11 | 1.339195031 | 0.084 | 0.01  | 3.59249E-07 | KO | Zfp825      | 0.074 |
| Upk1a       | 1.15904E-11 | 1.797288531 | 0.063 | 0.004 | 3.59917E-07 | KO | Upk1a       | 0.059 |
| Ccdc112     | 1.25102E-11 | 1.678566585 | 0.059 | 0.003 | 3.8848E-07  | KO | Ccdc112     | 0.056 |
| Fktn        | 1.26248E-11 | 0.911917238 | 0.084 | 0.01  | 3.92038E-07 | KO | Fktn        | 0.074 |
| Zfp747      | 1.27674E-11 | 1.236810974 | 0.059 | 0.003 | 3.96467E-07 | KO | Zfp747      | 0.056 |
| Sass6       | 1.51571E-11 | 0.823623018 | 0.109 | 0.018 | 4.70672E-07 | KO | Sass6       | 0.091 |
| Frmd4b      | 1.62709E-11 | 0.801303427 | 0.126 | 0.025 | 5.0526E-07  | KO | Frmd4b      | 0.101 |
| Pced1a      | 1.65553E-11 | 1.09288259  | 0.101 | 0.015 | 5.1409E-07  | KO | Pced1a      | 0.086 |
| Trappc2     | 1.70019E-11 | 0.764463331 | 0.101 | 0.015 | 5.2796E-07  | KO | Trappc2     | 0.086 |
| Tarsl2      | 1.73509E-11 | 1.613033289 | 0.08  | 0.009 | 5.38799E-07 | KO | Tarsl2      | 0.071 |
| Asb2        | 1.91778E-11 | 1.498474318 | 0.08  | 0.009 | 5.9553E-07  | KO | Asb2        | 0.071 |
| Tmem206     | 1.96891E-11 | 1.218989368 | 0.08  | 0.009 | 6.11406E-07 | KO | Tmem206     | 0.071 |
| Plekhm3     | 2.0535E-11  | 1.110221009 | 0.08  | 0.009 | 6.37674E-07 | KO | Plekhm3     | 0.071 |
| Nefh        | 2.9719E-11  | 1.189392835 | 0.097 | 0.014 | 9.22865E-07 | KO | Nefh        | 0.083 |
| Vsig10      | 2.99651E-11 | 0.793475846 | 0.088 | 0.012 | 9.30505E-07 | KO | Vsig10      | 0.076 |
| Ndufaf5     | 3.02031E-11 | 0.962418601 | 0.118 | 0.022 | 9.37897E-07 | KO | Ndufaf5     | 0.096 |
| Elk1        | 3.06184E-11 | 0.806346767 | 0.076 | 0.008 | 9.50792E-07 | KO | Elk1        | 0.068 |
| Arhgef10    | 3.11187E-11 | 0.808544886 | 0.076 | 0.008 | 9.6633E-07  | KO | Arhgef10    | 0.068 |
| Rfxank      | 3.13649E-11 | 0.94971616  | 0.097 | 0.014 | 9.73974E-07 | KO | Rfxank      | 0.083 |
| Ifi214      | 3.16271E-11 | 0.785897062 | 0.076 | 0.008 | 9.82116E-07 | KO | Ifi214      | 0.068 |
| D830025C05R | 3.17984E-11 | 0.728948394 | 0.076 | 0.008 | 9.87434E-07 | KO | D830025C05R | 0.068 |
| Pgap3       | 3.21436E-11 | 0.768623271 | 0.076 | 0.008 | 9.98154E-07 | KO | Pgap3       | 0.068 |
| Atxn2       | 3.60749E-11 | 0.701116707 | 0.122 | 0.024 | 1.12023E-06 | KO | Atxn2       | 0.098 |
| Abcb10      | 4.29548E-11 | 1.537535621 | 0.071 | 0.007 | 1.33388E-06 | KO | Abcb10      | 0.064 |
| Zdhhc24     | 4.49148E-11 | 1.501255629 | 0.071 | 0.007 | 1.39474E-06 | KO | Zdhhc24     | 0.064 |
| Gm14326     | 4.77784E-11 | 1.014051134 | 0.084 | 0.011 | 1.48366E-06 | KO | Gm14326     | 0.073 |
| Golm1       | 4.9207E-11  | 0.760688569 | 0.084 | 0.011 | 1.52803E-06 | KO | Golm1       | 0.073 |
| Pisd        | 4.96642E-11 | 0.988113987 | 0.101 | 0.016 | 1.54222E-06 | KO | Pisd        | 0.085 |
| Cd1d1       | 5.00915E-11 | 0.769602604 | 0.101 | 0.016 | 1.55549E-06 | KO | Cd1d1       | 0.085 |
| Jrkl        | 5.06601E-11 | 2.01700643  | 0.092 | 0.013 | 1.57315E-06 | KO | Jrkl        | 0.079 |
| Pcgf2       | 5.08357E-11 | 1.103875665 | 0.113 | 0.021 | 1.5786E-06  | KO | Pcgf2       | 0.092 |
| P2rx4       | 5.27821E-11 | 1.027145856 | 0.092 | 0.013 | 1.63904E-06 | KO | P2rx4       | 0.079 |
| Nkiras1     | 5.70678E-11 | 0.707047665 | 0.134 | 0.03  | 1.77213E-06 | KO | Nkiras1     | 0.104 |
| C2cd4b      | 5.8594E-11  | 2.201792338 | 0.067 | 0.006 | 1.81952E-06 | KO | C2cd4b      | 0.061 |
| Recql5      | 6.06625E-11 | 1.808204525 | 0.067 | 0.006 | 1.88375E-06 | KO | Recql5      | 0.061 |
| CAAA0114733 | 6.9894E-11  | 1.794363868 | 0.046 | 0.001 | 2.17042E-06 | KO | CAAA0114733 | 0.045 |
| Hmga1b      | 6.9894E-11  | 1.722229652 | 0.046 | 0.001 | 2.17042E-06 | KO | Hmga1b      | 0.045 |
| 3300005D01R | 7.39873E-11 | 1.072794002 | 0.08  | 0.01  | 2.29753E-06 | KO | 3300005D01R | 0.07  |

|              |             |             |       |       |             |    |              |       |
|--------------|-------------|-------------|-------|-------|-------------|----|--------------|-------|
| Cdh24        | 7.85913E-11 | 2.381085497 | 0.063 | 0.005 | 2.4405E-06  | KO | Cdh24        | 0.058 |
| Pask         | 8.26268E-11 | 0.881539893 | 0.08  | 0.01  | 2.56581E-06 | KO | Pask         | 0.07  |
| Zfp169       | 8.44769E-11 | 0.862010985 | 0.063 | 0.005 | 2.62326E-06 | KO | Zfp169       | 0.058 |
| Hook2        | 8.77459E-11 | 0.919410389 | 0.097 | 0.015 | 2.72477E-06 | KO | Hook2        | 0.082 |
| AU041133     | 8.77473E-11 | 0.779441799 | 0.08  | 0.01  | 2.72482E-06 | KO | AU041133     | 0.07  |
| Zfp983       | 9.25053E-11 | 2.384261925 | 0.05  | 0.002 | 2.87257E-06 | KO | Zfp983       | 0.048 |
| Gm10031      | 9.38385E-11 | 2.336611511 | 0.05  | 0.002 | 2.91397E-06 | KO | Gm10031      | 0.048 |
| Zfp973       | 9.58736E-11 | 1.81936274  | 0.05  | 0.002 | 2.97716E-06 | KO | Zfp973       | 0.048 |
| Gm6710       | 9.60903E-11 | 1.324336515 | 0.088 | 0.013 | 2.98389E-06 | KO | Gm6710       | 0.075 |
| Ii5          | 9.65615E-11 | 2.916162615 | 0.05  | 0.002 | 2.99853E-06 | KO | Ii5          | 0.048 |
| Wscd2        | 9.79518E-11 | 2.266363252 | 0.05  | 0.002 | 3.0417E-06  | KO | Wscd2        | 0.048 |
| Slc37a1      | 9.82004E-11 | 0.762254472 | 0.097 | 0.015 | 3.04942E-06 | KO | Slc37a1      | 0.082 |
| Gm7160       | 9.86541E-11 | 1.358277019 | 0.05  | 0.002 | 3.06351E-06 | KO | Gm7160       | 0.048 |
| Grk5         | 1.01446E-10 | 1.211767971 | 0.059 | 0.004 | 3.1502E-06  | KO | Grk5         | 0.055 |
| Hacl1        | 1.02734E-10 | 0.873061477 | 0.059 | 0.004 | 3.19019E-06 | KO | Hacl1        | 0.055 |
| Ddias        | 1.04906E-10 | 0.828654881 | 0.088 | 0.013 | 3.25763E-06 | KO | Ddias        | 0.075 |
| Atxn1l       | 1.10914E-10 | 0.757849478 | 0.109 | 0.02  | 3.44422E-06 | KO | Atxn1l       | 0.089 |
| Susd1        | 1.16529E-10 | 1.163832762 | 0.076 | 0.009 | 3.61858E-06 | KO | Susd1        | 0.067 |
| Zfp280b      | 1.27385E-10 | 0.706163913 | 0.113 | 0.022 | 3.95568E-06 | KO | Zfp280b      | 0.091 |
| Tada2b       | 1.27841E-10 | 1.269531853 | 0.076 | 0.009 | 3.96985E-06 | KO | Tada2b       | 0.067 |
| Klhl18       | 1.27933E-10 | 0.862674238 | 0.101 | 0.017 | 3.9727E-06  | KO | Klhl18       | 0.084 |
| Ddx11        | 1.36703E-10 | 1.122664543 | 0.101 | 0.017 | 4.24503E-06 | KO | Ddx11        | 0.084 |
| Frmf6        | 1.50291E-10 | 1.565416855 | 0.092 | 0.014 | 4.66698E-06 | KO | Frmf6        | 0.078 |
| Palb2        | 1.71058E-10 | 0.741470035 | 0.084 | 0.012 | 5.31186E-06 | KO | Palb2        | 0.072 |
| Zfp626       | 1.7446E-10  | 1.056212481 | 0.092 | 0.014 | 5.4175E-06  | KO | Zfp626       | 0.078 |
| Zfp653       | 1.76766E-10 | 0.828538241 | 0.092 | 0.014 | 5.48912E-06 | KO | Zfp653       | 0.078 |
| Bcl2l2       | 2.00469E-10 | 0.933045725 | 0.071 | 0.008 | 6.22517E-06 | KO | Bcl2l2       | 0.063 |
| Gm16754      | 2.04751E-10 | 0.988916187 | 0.071 | 0.008 | 6.35812E-06 | KO | Gm16754      | 0.063 |
| Ccdc138      | 2.1246E-10  | 0.95596197  | 0.071 | 0.008 | 6.59751E-06 | KO | Ccdc138      | 0.063 |
| Dna2         | 2.52631E-10 | 0.770093219 | 0.109 | 0.021 | 7.84494E-06 | KO | Dna2         | 0.088 |
| Pxylp1       | 2.64583E-10 | 0.703198449 | 0.097 | 0.016 | 8.21608E-06 | KO | Pxylp1       | 0.081 |
| Irgm2        | 2.70163E-10 | 1.197110858 | 0.097 | 0.016 | 8.38938E-06 | KO | Irgm2        | 0.081 |
| Yipf2        | 3.00181E-10 | 0.957208246 | 0.088 | 0.013 | 9.32154E-06 | KO | Yipf2        | 0.075 |
| Usp11        | 3.0124E-10  | 0.773623005 | 0.08  | 0.011 | 9.35442E-06 | KO | Usp11        | 0.069 |
| Trmo         | 3.02164E-10 | 1.282053595 | 0.067 | 0.007 | 9.3831E-06  | KO | Trmo         | 0.06  |
| Gins3        | 3.05562E-10 | 1.23157212  | 0.088 | 0.013 | 9.4886E-06  | KO | Gins3        | 0.075 |
| Ebi3         | 3.09658E-10 | 1.248413185 | 0.088 | 0.013 | 9.61582E-06 | KO | Ebi3         | 0.075 |
| Nsl1         | 3.13809E-10 | 0.700768821 | 0.088 | 0.013 | 9.7447E-06  | KO | Nsl1         | 0.075 |
| Fsbp         | 3.17067E-10 | 1.804764496 | 0.038 | 0     | 9.84589E-06 | KO | Fsbp         | 0.038 |
| Chek2        | 3.22581E-10 | 1.193588507 | 0.067 | 0.007 | 1.00171E-05 | KO | Chek2        | 0.06  |
| Zfp991       | 3.27892E-10 | 1.022340381 | 0.067 | 0.007 | 1.0182E-05  | KO | Zfp991       | 0.06  |
| Trgv2        | 3.3148E-10  | 0.779942074 | 0.067 | 0.007 | 1.02934E-05 | KO | Trgv2        | 0.06  |
| Efcab11      | 3.33288E-10 | 0.78587953  | 0.067 | 0.007 | 1.03496E-05 | KO | Efcab11      | 0.06  |
| Numb         | 3.57509E-10 | 0.823186212 | 0.101 | 0.018 | 1.11017E-05 | KO | Numb         | 0.083 |
| Egr2         | 4.13909E-10 | 2.310568697 | 0.063 | 0.006 | 1.28531E-05 | KO | Egr2         | 0.057 |
| Snx29        | 4.3307E-10  | 1.72140237  | 0.063 | 0.006 | 1.34481E-05 | KO | Snx29        | 0.057 |
| Olfr1369-ps1 | 4.50544E-10 | 1.960930928 | 0.063 | 0.006 | 1.39907E-05 | KO | Olfr1369-ps1 | 0.057 |
| Poll         | 4.72075E-10 | 0.708941864 | 0.092 | 0.015 | 1.46594E-05 | KO | Poll         | 0.077 |
| Rnf43        | 4.82114E-10 | 0.813664227 | 0.063 | 0.006 | 1.49711E-05 | KO | Rnf43        | 0.057 |
| Mpv17        | 5.05785E-10 | 1.16334626  | 0.076 | 0.01  | 1.57062E-05 | KO | Mpv17        | 0.066 |
| Sipa1l3      | 5.13261E-10 | 0.928902168 | 0.076 | 0.01  | 1.59383E-05 | KO | Sipa1l3      | 0.066 |

|             |             |             |       |       |             |    |             |       |
|-------------|-------------|-------------|-------|-------|-------------|----|-------------|-------|
| Gemin8      | 5.20162E-10 | 0.838743631 | 0.092 | 0.015 | 1.61526E-05 | KO | Gemin8      | 0.077 |
| Abhd4       | 5.35723E-10 | 0.715971482 | 0.092 | 0.015 | 1.66358E-05 | KO | Abhd4       | 0.077 |
| Trim36      | 5.41179E-10 | 1.322106874 | 0.084 | 0.013 | 1.68052E-05 | KO | Trim36      | 0.071 |
| Dhrs13      | 5.63572E-10 | 0.925207983 | 0.084 | 0.013 | 1.75006E-05 | KO | Dhrs13      | 0.071 |
| Mettl21a    | 6.00114E-10 | 0.931659104 | 0.109 | 0.022 | 1.86353E-05 | KO | Mettl21a    | 0.087 |
| Platr17     | 6.57352E-10 | 1.282488487 | 0.042 | 0.001 | 2.04127E-05 | KO | Platr17     | 0.041 |
| Zfp236      | 6.83257E-10 | 0.717876095 | 0.109 | 0.022 | 2.12172E-05 | KO | Zfp236      | 0.087 |
| Styk1       | 8.23243E-10 | 3.262629985 | 0.046 | 0.002 | 2.55642E-05 | KO | Styk1       | 0.044 |
| Ighmbp2     | 8.5043E-10  | 0.953420337 | 0.071 | 0.009 | 2.64084E-05 | KO | Ighmbp2     | 0.062 |
| Ovol2       | 8.64877E-10 | 1.859601061 | 0.046 | 0.002 | 2.6857E-05  | KO | Ovol2       | 0.044 |
| Gm26510     | 8.8076E-10  | 1.126707445 | 0.071 | 0.009 | 2.73502E-05 | KO | Gm26510     | 0.062 |
| Katnal1     | 8.83342E-10 | 1.602608659 | 0.046 | 0.002 | 2.74304E-05 | KO | Katnal1     | 0.044 |
| Nap1l3      | 8.89582E-10 | 1.603744181 | 0.046 | 0.002 | 2.76242E-05 | KO | Nap1l3      | 0.044 |
| BC048403    | 9.08125E-10 | 1.764815168 | 0.05  | 0.003 | 2.82E-05    | KO | BC048403    | 0.047 |
| Serpinb1b   | 9.20106E-10 | 1.705945926 | 0.05  | 0.003 | 2.85721E-05 | KO | Serpinb1b   | 0.047 |
| Ralgps1     | 9.32242E-10 | 0.71579513  | 0.05  | 0.003 | 2.89489E-05 | KO | Ralgps1     | 0.047 |
| Phf11a      | 1.00005E-09 | 0.881842642 | 0.08  | 0.012 | 3.10545E-05 | KO | Phf11a      | 0.068 |
| Hspa2       | 1.01197E-09 | 0.716926641 | 0.126 | 0.03  | 3.14246E-05 | KO | Hspa2       | 0.096 |
| Gm14325     | 1.17927E-09 | 1.008614875 | 0.067 | 0.008 | 3.662E-05   | KO | Gm14325     | 0.059 |
| Zfp317      | 1.22075E-09 | 0.890534825 | 0.105 | 0.021 | 3.7908E-05  | KO | Zfp317      | 0.084 |
| Xcl1        | 1.28003E-09 | 2.989411149 | 0.202 | 0.071 | 3.97487E-05 | KO | Xcl1        | 0.131 |
| Trbc1       | 1.31442E-09 | 0.776400307 | 0.618 | 0.427 | 4.08166E-05 | KO | Trbc1       | 0.191 |
| Hsh2d       | 1.32784E-09 | 0.955554579 | 0.067 | 0.008 | 4.12333E-05 | KO | Hsh2d       | 0.059 |
| Igip        | 1.34159E-09 | 1.284625268 | 0.067 | 0.008 | 4.16603E-05 | KO | Igip        | 0.059 |
| Mgme1       | 1.34851E-09 | 1.523006734 | 0.067 | 0.008 | 4.18753E-05 | KO | Mgme1       | 0.059 |
| Gm49359     | 1.35547E-09 | 1.047651061 | 0.067 | 0.008 | 4.20915E-05 | KO | Gm49359     | 0.059 |
| Lppos       | 1.3597E-09  | 0.80112688  | 0.105 | 0.021 | 4.22229E-05 | KO | Lppos       | 0.084 |
| Pdp2        | 1.3695E-09  | 0.817810801 | 0.067 | 0.008 | 4.25271E-05 | KO | Pdp2        | 0.059 |
| Urgcp       | 1.42731E-09 | 0.87733288  | 0.109 | 0.023 | 4.43224E-05 | KO | Urgcp       | 0.086 |
| Armc3       | 1.47173E-09 | 0.725339822 | 0.067 | 0.008 | 4.57016E-05 | KO | Armc3       | 0.059 |
| Gm37494     | 2.00403E-09 | 0.74712574  | 0.097 | 0.018 | 6.22312E-05 | KO | Gm37494     | 0.079 |
| Arl10       | 2.0392E-09  | 0.87594911  | 0.063 | 0.007 | 6.33234E-05 | KO | Arl10       | 0.056 |
| Ntrk3       | 2.07055E-09 | 1.807436365 | 0.088 | 0.015 | 6.42969E-05 | KO | Ntrk3       | 0.073 |
| Socs6       | 2.11005E-09 | 1.616701063 | 0.101 | 0.02  | 6.55234E-05 | KO | Socs6       | 0.081 |
| D11Wsu47e   | 2.16194E-09 | 1.11357359  | 0.063 | 0.007 | 6.71348E-05 | KO | D11Wsu47e   | 0.056 |
| Tpst1       | 2.19665E-09 | 1.118248476 | 0.063 | 0.007 | 6.82124E-05 | KO | Tpst1       | 0.056 |
| Ccdc137     | 2.22008E-09 | 0.898035851 | 0.063 | 0.007 | 6.89402E-05 | KO | Ccdc137     | 0.056 |
| Adal        | 2.22008E-09 | 0.837084631 | 0.063 | 0.007 | 6.89402E-05 | KO | Adal        | 0.056 |
| 2900076A07R | 2.89722E-09 | 1.790530242 | 0.071 | 0.01  | 8.99672E-05 | KO | 2900076A07R | 0.061 |
| Mettl13     | 3.00975E-09 | 1.062653566 | 0.071 | 0.01  | 9.34616E-05 | KO | Mettl13     | 0.061 |
| Magi3       | 3.03854E-09 | 0.815881515 | 0.071 | 0.01  | 9.43557E-05 | KO | Magi3       | 0.061 |
| Trav7d-3    | 3.06556E-09 | 2.345156513 | 0.034 | 0     | 9.51947E-05 | KO | Trav7d-3    | 0.034 |
| Spint1      | 3.06556E-09 | 2.340418324 | 0.034 | 0     | 9.51947E-05 | KO | Spint1      | 0.034 |
| Gm6594      | 3.06556E-09 | 1.466581111 | 0.034 | 0     | 9.51947E-05 | KO | Gm6594      | 0.034 |
| Jazf1       | 3.22728E-09 | 1.593638326 | 0.059 | 0.006 | 0.000100217 | KO | Jazf1       | 0.053 |
| Map6        | 3.2451E-09  | 1.700512928 | 0.059 | 0.006 | 0.00010077  | KO | Map6        | 0.053 |
| Gm21887     | 3.29913E-09 | 1.006082207 | 0.059 | 0.006 | 0.000102448 | KO | Gm21887     | 0.053 |
| Galnt10     | 3.31733E-09 | 1.059857447 | 0.059 | 0.006 | 0.000103013 | KO | Galnt10     | 0.053 |
| Tpm3-rs7    | 4.48376E-09 | 1.799363302 | 0.055 | 0.005 | 0.000139234 | KO | Tpm3-rs7    | 0.05  |
| Arl4d       | 4.53315E-09 | 1.028796062 | 0.084 | 0.014 | 0.000140768 | KO | Arl4d       | 0.07  |
| Tmem185b    | 4.72169E-09 | 1.806947494 | 0.055 | 0.005 | 0.000146622 | KO | Tmem185b    | 0.05  |

|              |             |             |       |       |             |    |              |       |
|--------------|-------------|-------------|-------|-------|-------------|----|--------------|-------|
| Spo11        | 4.7762E-09  | 1.09241843  | 0.055 | 0.005 | 0.000148315 | KO | Spo11        | 0.05  |
| Syngn3       | 4.88708E-09 | 1.235503549 | 0.055 | 0.005 | 0.000151759 | KO | Syngn3       | 0.05  |
| 1110046J04Ri | 4.88708E-09 | 0.956764195 | 0.055 | 0.005 | 0.000151759 | KO | 1110046J04Ri | 0.05  |
| Prune2       | 4.91519E-09 | 0.74686682  | 0.055 | 0.005 | 0.000152631 | KO | Prune2       | 0.05  |
| Cnih2        | 5.07183E-09 | 1.189633996 | 0.067 | 0.009 | 0.000157495 | KO | Cnih2        | 0.058 |
| Ankle1       | 5.50959E-09 | 0.955206234 | 0.067 | 0.009 | 0.000171089 | KO | Ankle1       | 0.058 |
| Art2b        | 5.98075E-09 | 2.300697295 | 0.038 | 0.001 | 0.00018572  | KO | Art2b        | 0.037 |
| Gm20300      | 6.07269E-09 | 2.014191508 | 0.038 | 0.001 | 0.000188575 | KO | Gm20300      | 0.037 |
| Gm11707      | 6.16142E-09 | 1.331870192 | 0.05  | 0.004 | 0.00019133  | KO | Gm11707      | 0.046 |
| Mir17hg      | 6.16142E-09 | 0.938389003 | 0.05  | 0.004 | 0.00019133  | KO | Mir17hg      | 0.046 |
| Pus3         | 6.16397E-09 | 0.744510146 | 0.088 | 0.016 | 0.00019141  | KO | Pus3         | 0.072 |
| Wwc1         | 6.166E-09   | 1.558962856 | 0.038 | 0.001 | 0.000191473 | KO | Wwc1         | 0.037 |
| Etaa1os      | 6.31206E-09 | 1.337229383 | 0.05  | 0.004 | 0.000196008 | KO | Etaa1os      | 0.046 |
| Ifit1bl1     | 6.54476E-09 | 0.937298971 | 0.05  | 0.004 | 0.000203234 | KO | Ifit1bl1     | 0.046 |
| Frs2         | 7.19344E-09 | 0.766384404 | 0.118 | 0.029 | 0.000223378 | KO | Frs2         | 0.089 |
| Pak6         | 7.34947E-09 | 2.190225563 | 0.046 | 0.003 | 0.000228223 | KO | Pak6         | 0.043 |
| Gm6793       | 7.49239E-09 | 1.352061337 | 0.046 | 0.003 | 0.000232661 | KO | Gm6793       | 0.043 |
| Pomt2        | 7.54063E-09 | 0.984955342 | 0.046 | 0.003 | 0.000234159 | KO | Pomt2        | 0.043 |
| Gstt3        | 7.63801E-09 | 1.321313387 | 0.046 | 0.003 | 0.000237183 | KO | Gstt3        | 0.043 |
| Gm20498      | 7.68716E-09 | 1.726450205 | 0.046 | 0.003 | 0.000238709 | KO | Gm20498      | 0.043 |
| Klra3        | 7.73662E-09 | 1.65708361  | 0.046 | 0.003 | 0.000240245 | KO | Klra3        | 0.043 |
| 9130011E15Ri | 7.73662E-09 | 1.099918233 | 0.046 | 0.003 | 0.000240245 | KO | 9130011E15Ri | 0.043 |
| Zfp58        | 7.78638E-09 | 1.103548201 | 0.046 | 0.003 | 0.000241791 | KO | Zfp58        | 0.043 |
| Atrnl1       | 7.78638E-09 | 0.780514413 | 0.046 | 0.003 | 0.000241791 | KO | Atrnl1       | 0.043 |
| Zkscan7      | 7.78638E-09 | 0.750134856 | 0.046 | 0.003 | 0.000241791 | KO | Zkscan7      | 0.043 |
| Afg1l        | 7.83078E-09 | 1.46424401  | 0.042 | 0.002 | 0.000243169 | KO | Afg1l        | 0.04  |
| Gm10658      | 7.88514E-09 | 1.441677427 | 0.042 | 0.002 | 0.000244857 | KO | Gm10658      | 0.04  |
| 2210011C24R  | 7.88514E-09 | 0.940114863 | 0.042 | 0.002 | 0.000244857 | KO | 2210011C24R  | 0.04  |
| Rgs11        | 8.71502E-09 | 1.440803942 | 0.063 | 0.008 | 0.000270628 | KO | Rgs11        | 0.055 |
| Wdr74        | 8.71502E-09 | 1.418021679 | 0.063 | 0.008 | 0.000270628 | KO | Wdr74        | 0.055 |
| Kcnq5        | 9.25393E-09 | 1.044178775 | 0.063 | 0.008 | 0.000287362 | KO | Kcnq5        | 0.055 |
| Gm16062      | 9.44066E-09 | 1.01220294  | 0.063 | 0.008 | 0.000293161 | KO | Gm16062      | 0.055 |
| Hlcs         | 9.51801E-09 | 0.932535547 | 0.097 | 0.02  | 0.000295563 | KO | Hlcs         | 0.077 |
| AC165953.2   | 1.04762E-08 | 0.83823323  | 0.071 | 0.011 | 0.000325318 | KO | AC165953.2   | 0.06  |
| Gla          | 1.18256E-08 | 0.97690143  | 0.084 | 0.015 | 0.000367222 | KO | Gla          | 0.069 |
| Il1rl1       | 1.2431E-08  | 2.696016761 | 0.076 | 0.013 | 0.000386019 | KO | Il1rl1       | 0.063 |
| Zfp282       | 1.2477E-08  | 0.704757811 | 0.122 | 0.032 | 0.000387448 | KO | Zfp282       | 0.09  |
| Ydjc         | 1.32445E-08 | 0.707696154 | 0.105 | 0.024 | 0.000411282 | KO | Ydjc         | 0.081 |
| D930016D06R  | 1.40952E-08 | 1.156122696 | 0.059 | 0.007 | 0.000437698 | KO | D930016D06R  | 0.052 |
| Oas3         | 1.44636E-08 | 1.346048787 | 0.059 | 0.007 | 0.000449139 | KO | Oas3         | 0.052 |
| Dpy19l3      | 1.46136E-08 | 1.144501673 | 0.059 | 0.007 | 0.000453796 | KO | Dpy19l3      | 0.052 |
| Tmem177      | 1.49181E-08 | 0.96380877  | 0.059 | 0.007 | 0.000463252 | KO | Tmem177      | 0.052 |
| 4833407H14R  | 1.51505E-08 | 0.791958879 | 0.059 | 0.007 | 0.000470469 | KO | 4833407H14R  | 0.052 |
| St3gal3      | 1.59885E-08 | 1.053818867 | 0.076 | 0.013 | 0.000496491 | KO | St3gal3      | 0.063 |
| Nkrf         | 1.65774E-08 | 1.089961967 | 0.067 | 0.01  | 0.000514778 | KO | Nkrf         | 0.057 |
| Prkab2       | 1.66823E-08 | 0.875004011 | 0.076 | 0.013 | 0.000518035 | KO | Prkab2       | 0.063 |
| Vwa5a        | 1.79456E-08 | 1.825070022 | 0.088 | 0.017 | 0.000557264 | KO | Vwa5a        | 0.071 |
| Gm20275      | 2.14229E-08 | 0.966362027 | 0.055 | 0.006 | 0.000665245 | KO | Gm20275      | 0.049 |
| Zfp827       | 2.23605E-08 | 1.388483033 | 0.055 | 0.006 | 0.000694361 | KO | Zfp827       | 0.049 |
| Unc5cl       | 2.24805E-08 | 1.816961363 | 0.055 | 0.006 | 0.000698086 | KO | Unc5cl       | 0.049 |
| Slc9b2       | 2.27223E-08 | 1.19228864  | 0.055 | 0.006 | 0.000705595 | KO | Slc9b2       | 0.049 |

|             |             |             |       |       |             |    |             |       |
|-------------|-------------|-------------|-------|-------|-------------|----|-------------|-------|
| Gm33782     | 2.29666E-08 | 1.51773537  | 0.055 | 0.006 | 0.000713183 | KO | Gm33782     | 0.049 |
| Prr11       | 2.3266E-08  | 1.026814843 | 0.105 | 0.025 | 0.000722478 | KO | Prr11       | 0.08  |
| Gm20707     | 2.33379E-08 | 0.750921145 | 0.055 | 0.006 | 0.000724712 | KO | Gm20707     | 0.049 |
| St3gal1     | 2.37116E-08 | 0.815096356 | 0.134 | 0.038 | 0.000736317 | KO | St3gal1     | 0.096 |
| Slc35e3     | 2.3715E-08  | 0.987593766 | 0.055 | 0.006 | 0.000736423 | KO | Slc35e3     | 0.049 |
| Apol7e      | 2.3715E-08  | 0.866497783 | 0.055 | 0.006 | 0.000736423 | KO | Apol7e      | 0.049 |
| Caprin2     | 2.38421E-08 | 0.710881111 | 0.055 | 0.006 | 0.000740367 | KO | Caprin2     | 0.049 |
| Srp54c      | 2.9748E-08  | 1.446141015 | 0.029 | 0     | 0.000923765 | KO | Srp54c      | 0.029 |
| Slc32a1     | 2.9748E-08  | 1.418508266 | 0.029 | 0     | 0.000923765 | KO | Slc32a1     | 0.029 |
| Pigg        | 3.12163E-08 | 1.033049953 | 0.063 | 0.009 | 0.00096936  | KO | Pigg        | 0.054 |
| Chst10      | 3.23622E-08 | 0.755087463 | 0.071 | 0.012 | 0.001004942 | KO | Chst10      | 0.059 |
| Zfyve21     | 3.35059E-08 | 0.823501324 | 0.063 | 0.009 | 0.00104046  | KO | Zfyve21     | 0.054 |
| Ankrd29     | 3.36512E-08 | 1.579135756 | 0.05  | 0.005 | 0.001044972 | KO | Ankrd29     | 0.045 |
| Phf11d      | 3.40292E-08 | 1.324920443 | 0.05  | 0.005 | 0.001056707 | KO | Phf11d      | 0.045 |
| Miga2       | 3.4992E-08  | 1.58221764  | 0.05  | 0.005 | 0.001086607 | KO | Miga2       | 0.045 |
| Gm10184     | 3.53845E-08 | 1.063546842 | 0.05  | 0.005 | 0.001098795 | KO | Gm10184     | 0.045 |
| Ccl1        | 3.5797E-08  | 2.635460305 | 0.126 | 0.037 | 0.001111605 | KO | Ccl1        | 0.089 |
| Noc3l       | 4.0059E-08  | 0.859998789 | 0.092 | 0.02  | 0.001243953 | KO | Noc3l       | 0.072 |
| Usp54       | 4.90451E-08 | 1.016355351 | 0.046 | 0.004 | 0.001522997 | KO | Usp54       | 0.042 |
| Pop1        | 5.00196E-08 | 0.723009669 | 0.105 | 0.026 | 0.001553259 | KO | Pop1        | 0.079 |
| Atcay       | 5.02105E-08 | 0.882413543 | 0.046 | 0.004 | 0.001559187 | KO | Atcay       | 0.042 |
| Kcnip3      | 5.02105E-08 | 0.876262925 | 0.046 | 0.004 | 0.001559187 | KO | Kcnip3      | 0.042 |
| Xpo5        | 5.29789E-08 | 1.18059181  | 0.067 | 0.011 | 0.001645155 | KO | Xpo5        | 0.056 |
| Lcn4        | 5.41537E-08 | 0.870479818 | 0.067 | 0.011 | 0.001681635 | KO | Lcn4        | 0.056 |
| Prmt2       | 5.51117E-08 | 0.949535066 | 0.067 | 0.011 | 0.001711383 | KO | Prmt2       | 0.056 |
| Urb1        | 5.55968E-08 | 0.751718806 | 0.067 | 0.011 | 0.001726447 | KO | Urb1        | 0.056 |
| 2410131K14R | 5.60413E-08 | 0.819785482 | 0.08  | 0.015 | 0.00174025  | KO | 2410131K14R | 0.065 |
| Lif         | 5.68101E-08 | 2.834863269 | 0.034 | 0.001 | 0.001764125 | KO | Lif         | 0.033 |
| 4930570N18R | 5.7672E-08  | 1.737081098 | 0.034 | 0.001 | 0.001790888 | KO | 4930570N18R | 0.033 |
| Zfp420      | 5.7672E-08  | 1.486912342 | 0.034 | 0.001 | 0.001790888 | KO | Zfp420      | 0.033 |
| Myo16       | 5.7672E-08  | 0.962165577 | 0.034 | 0.001 | 0.001790888 | KO | Myo16       | 0.033 |
| Mccc2       | 6.30215E-08 | 1.397219971 | 0.042 | 0.003 | 0.001957007 | KO | Mccc2       | 0.039 |
| Nrbp2       | 6.38147E-08 | 1.226589991 | 0.042 | 0.003 | 0.001981638 | KO | Nrbp2       | 0.039 |
| Hyal1       | 6.72113E-08 | 2.132568576 | 0.038 | 0.002 | 0.002087111 | KO | Hyal1       | 0.036 |
| C030037D09R | 6.81288E-08 | 1.619953968 | 0.038 | 0.002 | 0.002115604 | KO | C030037D09R | 0.036 |
| Tgtp2       | 6.81288E-08 | 1.5743498   | 0.038 | 0.002 | 0.002115604 | KO | Tgtp2       | 0.036 |
| Ptgr1       | 6.81288E-08 | 1.029444404 | 0.038 | 0.002 | 0.002115604 | KO | Ptgr1       | 0.036 |
| Ube2c       | 6.85503E-08 | 0.693899402 | 0.399 | 0.207 | 0.002128691 | KO | Ube2c       | 0.192 |
| Osr2        | 6.85921E-08 | 1.429183963 | 0.038 | 0.002 | 0.002129991 | KO | Osr2        | 0.036 |
| Slc2a9      | 6.90585E-08 | 1.388197421 | 0.038 | 0.002 | 0.002144473 | KO | Slc2a9      | 0.036 |
| Kdm8        | 6.90585E-08 | 1.175370137 | 0.038 | 0.002 | 0.002144473 | KO | Kdm8        | 0.036 |
| Gm2682      | 7.18619E-08 | 1.030947568 | 0.084 | 0.017 | 0.002231528 | KO | Gm2682      | 0.067 |
| Ptprk       | 7.31964E-08 | 1.210850714 | 0.092 | 0.021 | 0.002272967 | KO | Ptprk       | 0.071 |
| Fbxo32      | 7.84873E-08 | 0.701043321 | 0.084 | 0.017 | 0.002437265 | KO | Fbxo32      | 0.067 |
| Fam122b     | 7.90653E-08 | 0.776422148 | 0.084 | 0.017 | 0.002455216 | KO | Fam122b     | 0.067 |
| Itga1       | 8.52236E-08 | 0.940117724 | 0.088 | 0.019 | 0.002646448 | KO | Itga1       | 0.069 |
| Bckdhb      | 8.57431E-08 | 0.861581012 | 0.071 | 0.013 | 0.00266258  | KO | Bckdhb      | 0.058 |
| Ust         | 9.64924E-08 | 1.587966701 | 0.055 | 0.007 | 0.002996377 | KO | Ust         | 0.048 |
| Polr1e      | 9.68165E-08 | 0.808918053 | 0.092 | 0.021 | 0.003006443 | KO | Polr1e      | 0.071 |
| Fchsd1      | 9.74599E-08 | 0.871747795 | 0.055 | 0.007 | 0.003026423 | KO | Fchsd1      | 0.048 |
| Tmtc4       | 9.79472E-08 | 0.77386819  | 0.055 | 0.007 | 0.003041554 | KO | Tmtc4       | 0.048 |

|              |             |             |       |       |             |    |              |       |
|--------------|-------------|-------------|-------|-------|-------------|----|--------------|-------|
| Itgb8        | 1.04877E-07 | 1.114011167 | 0.063 | 0.01  | 0.003256746 | KO | Itgb8        | 0.053 |
| Ccdc28b      | 1.10915E-07 | 0.916966915 | 0.105 | 0.027 | 0.003444231 | KO | Ccdc28b      | 0.078 |
| 3010003L21Ri | 1.1338E-07  | 1.1363752   | 0.076 | 0.014 | 0.00352079  | KO | 3010003L21Ri | 0.062 |
| Gpr19        | 1.54046E-07 | 1.40078611  | 0.05  | 0.006 | 0.004783605 | KO | Gpr19        | 0.044 |
| Rad51c       | 1.56457E-07 | 1.13430996  | 0.05  | 0.006 | 0.004858445 | KO | Rad51c       | 0.044 |
| Armc6        | 1.58684E-07 | 1.00888611  | 0.067 | 0.012 | 0.004927628 | KO | Armc6        | 0.055 |
| Bace2        | 1.61348E-07 | 0.763325642 | 0.067 | 0.012 | 0.005010333 | KO | Bace2        | 0.055 |
| Tlcd2        | 1.64738E-07 | 0.817071334 | 0.067 | 0.012 | 0.005115604 | KO | Tlcd2        | 0.055 |
| Serpinb1a    | 1.79253E-07 | 1.721467958 | 0.059 | 0.009 | 0.005566336 | KO | Serpinb1a    | 0.05  |
| Kcnmb4       | 1.8507E-07  | 1.219119296 | 0.059 | 0.009 | 0.005746984 | KO | Kcnmb4       | 0.05  |
| Hus1         | 1.88069E-07 | 1.059145146 | 0.088 | 0.02  | 0.005840104 | KO | Hus1         | 0.068 |
| Harbi1       | 1.90201E-07 | 0.850138424 | 0.059 | 0.009 | 0.005906324 | KO | Harbi1       | 0.05  |
| Syne2        | 2.30599E-07 | 0.779899109 | 0.071 | 0.013 | 0.007160794 | KO | Syne2        | 0.058 |
| Cxxc5        | 2.35523E-07 | 1.511528642 | 0.046 | 0.005 | 0.0073137   | KO | Cxxc5        | 0.041 |
| 4930524J08Ri | 2.55398E-07 | 0.861855864 | 0.046 | 0.005 | 0.007930885 | KO | 4930524J08Ri | 0.041 |
| Csrnp2       | 2.56779E-07 | 0.980670202 | 0.046 | 0.005 | 0.007973772 | KO | Csrnp2       | 0.041 |
| Bik          | 2.56779E-07 | 0.701712548 | 0.046 | 0.005 | 0.007973772 | KO | Bik          | 0.041 |
| Mid2         | 2.6367E-07  | 1.190549078 | 0.076 | 0.015 | 0.008187743 | KO | Mid2         | 0.061 |
| Il4          | 2.90339E-07 | 2.412720684 | 0.025 | 0     | 0.009015911 | KO | Il4          | 0.025 |
| Gm20139      | 2.90339E-07 | 2.088350581 | 0.025 | 0     | 0.009015911 | KO | Gm20139      | 0.025 |
| Ttbk2        | 2.90339E-07 | 1.879937495 | 0.025 | 0     | 0.009015911 | KO | Ttbk2        | 0.025 |
| Slc15a1      | 2.90339E-07 | 1.834918816 | 0.025 | 0     | 0.009015911 | KO | Slc15a1      | 0.025 |
| Pdzd2        | 2.90339E-07 | 1.624547647 | 0.025 | 0     | 0.009015911 | KO | Pdzd2        | 0.025 |
| Cfap126      | 2.90339E-07 | 1.616541057 | 0.025 | 0     | 0.009015911 | KO | Cfap126      | 0.025 |
| Gm3435       | 2.90339E-07 | 1.466576227 | 0.025 | 0     | 0.009015911 | KO | Gm3435       | 0.025 |
| Slc17a9      | 2.93963E-07 | 1.246906528 | 0.063 | 0.011 | 0.009128422 | KO | Slc17a9      | 0.052 |
| Sumf2        | 3.0024E-07  | 0.909189127 | 0.063 | 0.011 | 0.009323351 | KO | Sumf2        | 0.052 |
| Gm5141       | 3.09246E-07 | 0.715430281 | 0.063 | 0.011 | 0.009603016 | KO | Gm5141       | 0.052 |
| A430078G23R  | 3.11867E-07 | 0.849684268 | 0.063 | 0.011 | 0.009684397 | KO | A430078G23R  | 0.052 |
| Zbtb34       | 3.14509E-07 | 1.249374255 | 0.063 | 0.011 | 0.009766443 | KO | Zbtb34       | 0.052 |
| Usp21        | 3.19858E-07 | 0.830455194 | 0.063 | 0.011 | 0.009932554 | KO | Usp21        | 0.052 |
| Rab23        | 3.40907E-07 | 1.431110748 | 0.055 | 0.008 | 0.010586188 | KO | Rab23        | 0.047 |
| Plagl1       | 3.40907E-07 | 1.302209126 | 0.055 | 0.008 | 0.010586188 | KO | Plagl1       | 0.047 |
| Slc27a4      | 3.40907E-07 | 0.709730859 | 0.055 | 0.008 | 0.010586188 | KO | Slc27a4      | 0.047 |
| Rpp38        | 3.42503E-07 | 1.285643017 | 0.055 | 0.008 | 0.010635743 | KO | Rpp38        | 0.047 |
| Kantr        | 3.50591E-07 | 0.880872146 | 0.055 | 0.008 | 0.010886898 | KO | Kantr        | 0.047 |
| Abhd6        | 3.5223E-07  | 0.916224625 | 0.055 | 0.008 | 0.010937811 | KO | Abhd6        | 0.047 |
| Gm10827      | 3.56036E-07 | 1.64077939  | 0.042 | 0.004 | 0.011055982 | KO | Gm10827      | 0.038 |
| Zfp940       | 3.58069E-07 | 1.105122135 | 0.042 | 0.004 | 0.01111913  | KO | Zfp940       | 0.038 |
| Mettl8       | 3.6217E-07  | 1.160818263 | 0.042 | 0.004 | 0.011246472 | KO | Mettl8       | 0.038 |
| Ninj2        | 3.66316E-07 | 1.289453347 | 0.042 | 0.004 | 0.01137522  | KO | Ninj2        | 0.038 |
| Reck         | 3.68407E-07 | 1.27250047  | 0.042 | 0.004 | 0.011440127 | KO | Reck         | 0.038 |
| Hist1h2ag    | 3.76883E-07 | 0.879751411 | 0.042 | 0.004 | 0.011703347 | KO | Hist1h2ag    | 0.038 |
| Acpp         | 3.79031E-07 | 1.027341084 | 0.042 | 0.004 | 0.011770059 | KO | Acpp         | 0.038 |
| 6330418K02R  | 3.79031E-07 | 0.987897783 | 0.042 | 0.004 | 0.011770059 | KO | 6330418K02R  | 0.038 |
| Naif1        | 3.79031E-07 | 0.862956127 | 0.042 | 0.004 | 0.011770059 | KO | Naif1        | 0.038 |
| Glis1        | 3.79031E-07 | 0.781025204 | 0.042 | 0.004 | 0.011770059 | KO | Glis1        | 0.038 |
| Tnfsf14      | 5.05002E-07 | 1.289332877 | 0.038 | 0.003 | 0.015681814 | KO | Tnfsf14      | 0.035 |
| Gpr35        | 5.08077E-07 | 0.930606342 | 0.038 | 0.003 | 0.015777318 | KO | Gpr35        | 0.035 |
| Depdc1b      | 5.11171E-07 | 1.125278687 | 0.038 | 0.003 | 0.015873383 | KO | Depdc1b      | 0.035 |
| Gipc3        | 5.11171E-07 | 1.11513648  | 0.038 | 0.003 | 0.015873383 | KO | Gipc3        | 0.035 |

|              |             |             |       |       |             |    |              |       |
|--------------|-------------|-------------|-------|-------|-------------|----|--------------|-------|
| Gm26614      | 5.14247E-07 | 1.908964904 | 0.029 | 0.001 | 0.015968898 | KO | Gm26614      | 0.028 |
| Alpk2        | 5.33672E-07 | 3.070544864 | 0.029 | 0.001 | 0.016572111 | KO | Alpk2        | 0.028 |
| Chrnbl       | 5.33672E-07 | 1.74598667  | 0.029 | 0.001 | 0.016572111 | KO | Chrnbl       | 0.028 |
| Gm28187      | 5.37641E-07 | 1.420645412 | 0.029 | 0.001 | 0.016695362 | KO | Gm28187      | 0.028 |
| Psd          | 5.37641E-07 | 1.290679287 | 0.029 | 0.001 | 0.016695362 | KO | Psd          | 0.028 |
| Gm4668       | 5.37641E-07 | 1.28081636  | 0.029 | 0.001 | 0.016695362 | KO | Gm4668       | 0.028 |
| Gprc5a       | 5.37641E-07 | 1.265712486 | 0.029 | 0.001 | 0.016695362 | KO | Gprc5a       | 0.028 |
| Ccr4         | 5.37641E-07 | 1.025654664 | 0.029 | 0.001 | 0.016695362 | KO | Ccr4         | 0.028 |
| Tmppe        | 5.37641E-07 | 0.970772473 | 0.029 | 0.001 | 0.016695362 | KO | Tmppe        | 0.028 |
| Il10         | 5.4866E-07  | 2.872344017 | 0.05  | 0.007 | 0.017037547 | KO | Il10         | 0.043 |
| Ptgfrn       | 5.51585E-07 | 1.338510283 | 0.059 | 0.01  | 0.01712838  | KO | Ptgfrn       | 0.049 |
| 6720489N17R  | 5.84203E-07 | 1.567294732 | 0.034 | 0.002 | 0.018141246 | KO | 6720489N17R  | 0.032 |
| Gm340        | 5.88078E-07 | 2.715788723 | 0.034 | 0.002 | 0.01826158  | KO | Gm340        | 0.032 |
| Gm27003      | 5.89784E-07 | 0.797414796 | 0.05  | 0.007 | 0.018314568 | KO | Gm27003      | 0.043 |
| Adarb2       | 5.91978E-07 | 0.938379687 | 0.034 | 0.002 | 0.018382684 | KO | Adarb2       | 0.032 |
| Serpini1     | 5.91978E-07 | 0.79796297  | 0.034 | 0.002 | 0.018382684 | KO | Serpini1     | 0.032 |
| Fam19a3      | 5.95903E-07 | 1.45226583  | 0.034 | 0.002 | 0.018504561 | KO | Fam19a3      | 0.032 |
| Cdk5r1       | 5.95903E-07 | 1.191903363 | 0.034 | 0.002 | 0.018504561 | KO | Cdk5r1       | 0.032 |
| Dlg3         | 5.95903E-07 | 1.183117239 | 0.034 | 0.002 | 0.018504561 | KO | Dlg3         | 0.032 |
| Fam89a       | 5.95903E-07 | 1.139893476 | 0.034 | 0.002 | 0.018504561 | KO | Fam89a       | 0.032 |
| 2810455O05R  | 5.95903E-07 | 0.762717899 | 0.034 | 0.002 | 0.018504561 | KO | 2810455O05R  | 0.032 |
| Top1mt       | 6.04141E-07 | 0.990965627 | 0.05  | 0.007 | 0.018760386 | KO | Top1mt       | 0.043 |
| Bdh1         | 6.67519E-07 | 0.697117572 | 0.08  | 0.018 | 0.020728455 | KO | Bdh1         | 0.062 |
| Lta          | 7.65661E-07 | 1.504369226 | 0.063 | 0.012 | 0.023776075 | KO | Lta          | 0.051 |
| Acss2        | 9.73385E-07 | 1.169813842 | 0.067 | 0.013 | 0.030226526 | KO | Acss2        | 0.054 |
| Mfsd2a       | 9.98218E-07 | 1.253144737 | 0.055 | 0.009 | 0.030997662 | KO | Mfsd2a       | 0.046 |
| 1700020L24Ri | 1.02642E-06 | 0.968160198 | 0.046 | 0.006 | 0.031873418 | KO | 1700020L24Ri | 0.04  |
| L2hgdh       | 1.05229E-06 | 0.916998995 | 0.046 | 0.006 | 0.032676809 | KO | L2hgdh       | 0.04  |
| Tedc2        | 1.11381E-06 | 0.720577327 | 0.055 | 0.009 | 0.034587051 | KO | Tedc2        | 0.046 |
| Egr3         | 1.67717E-06 | 1.617831426 | 0.042 | 0.005 | 0.052081233 | KO | Egr3         | 0.037 |
| Gm20939      | 1.6947E-06  | 1.213642712 | 0.042 | 0.005 | 0.052625606 | KO | Gm20939      | 0.037 |
| Macrodl      | 1.74836E-06 | 0.760814804 | 0.042 | 0.005 | 0.054291734 | KO | Macrodl      | 0.037 |
| Naa25        | 1.78797E-06 | 0.715199803 | 0.105 | 0.032 | 0.055521707 | KO | Naa25        | 0.073 |
| Tnfsf8       | 1.84759E-06 | 1.354170778 | 0.101 | 0.03  | 0.057373197 | KO | Tnfsf8       | 0.071 |
| Smug1        | 2.22016E-06 | 1.146389883 | 0.067 | 0.014 | 0.068942778 | KO | Smug1        | 0.053 |
| Mcoln2       | 2.63286E-06 | 0.962887873 | 0.038 | 0.004 | 0.081758141 | KO | Mcoln2       | 0.034 |
| Pus7l        | 2.64733E-06 | 1.186350623 | 0.038 | 0.004 | 0.082207585 | KO | Pus7l        | 0.034 |
| Samd11       | 2.66188E-06 | 2.116084758 | 0.038 | 0.004 | 0.082659401 | KO | Samd11       | 0.034 |
| Zfp324       | 2.69121E-06 | 0.981796391 | 0.038 | 0.004 | 0.083570191 | KO | Zfp324       | 0.034 |
| Gm26890      | 2.70599E-06 | 0.744433568 | 0.038 | 0.004 | 0.08402919  | KO | Gm26890      | 0.034 |
| Hgh1         | 2.75203E-06 | 0.776852528 | 0.071 | 0.016 | 0.085458902 | KO | Hgh1         | 0.055 |
| Esrp1        | 2.85911E-06 | 2.35926077  | 0.021 | 0     | 0.088784094 | KO | Esrp1        | 0.021 |
| Gm47997      | 2.85911E-06 | 1.712342752 | 0.021 | 0     | 0.088784094 | KO | Gm47997      | 0.021 |
| Trim6        | 2.85911E-06 | 1.701925036 | 0.021 | 0     | 0.088784094 | KO | Trim6        | 0.021 |
| Eepd1        | 2.85911E-06 | 1.542724244 | 0.021 | 0     | 0.088784094 | KO | Eepd1        | 0.021 |
| Zfp383       | 2.85911E-06 | 1.527386175 | 0.021 | 0     | 0.088784094 | KO | Zfp383       | 0.021 |
| Adora2b      | 2.85911E-06 | 1.491984029 | 0.021 | 0     | 0.088784094 | KO | Adora2b      | 0.021 |
| Gm30918      | 2.85911E-06 | 1.437309633 | 0.021 | 0     | 0.088784094 | KO | Gm30918      | 0.021 |
| Gm49032      | 2.85911E-06 | 1.343728925 | 0.021 | 0     | 0.088784094 | KO | Gm49032      | 0.021 |
| Erfe         | 2.85911E-06 | 1.024725103 | 0.021 | 0     | 0.088784094 | KO | Erfe         | 0.021 |
| AC168090.1   | 2.85911E-06 | 0.950584604 | 0.021 | 0     | 0.088784094 | KO | AC168090.1   | 0.021 |

|              |             |             |       |       |             |    |              |       |
|--------------|-------------|-------------|-------|-------|-------------|----|--------------|-------|
| Gm21994      | 2.85911E-06 | 0.916665197 | 0.021 | 0     | 0.088784094 | KO | Gm21994      | 0.021 |
| Vav2         | 3.06067E-06 | 1.409898864 | 0.055 | 0.01  | 0.095042993 | KO | Vav2         | 0.045 |
| Mx1          | 3.08595E-06 | 0.73036597  | 0.055 | 0.01  | 0.095827931 | KO | Mx1          | 0.045 |
| Zfp873       | 3.41165E-06 | 1.088807958 | 0.046 | 0.007 | 0.105941951 | KO | Zfp873       | 0.039 |
| Axin2        | 3.42745E-06 | 1.325500303 | 0.046 | 0.007 | 0.10643246  | KO | Axin2        | 0.039 |
| Sirt4        | 3.5728E-06  | 0.969734026 | 0.046 | 0.007 | 0.110946132 | KO | Sirt4        | 0.039 |
| Hist1h2af    | 3.62255E-06 | 0.912660268 | 0.046 | 0.007 | 0.112491059 | KO | Hist1h2af    | 0.039 |
| Apobec2      | 3.65609E-06 | 0.983454799 | 0.046 | 0.007 | 0.113532446 | KO | Apobec2      | 0.039 |
| F2rl2        | 3.66667E-06 | 2.182611514 | 0.034 | 0.003 | 0.113861124 | KO | F2rl2        | 0.031 |
| 1700056N10R  | 3.79815E-06 | 1.732889696 | 0.034 | 0.003 | 0.117943907 | KO | 1700056N10R  | 0.031 |
| Rsad1        | 3.8883E-06  | 1.279710302 | 0.034 | 0.003 | 0.120743332 | KO | Rsad1        | 0.031 |
| Gm15326      | 3.93414E-06 | 1.280445458 | 0.034 | 0.003 | 0.122166819 | KO | Gm15326      | 0.031 |
| Lrrc9        | 3.93414E-06 | 0.95143454  | 0.034 | 0.003 | 0.122166819 | KO | Lrrc9        | 0.031 |
| Zc2hc1a      | 3.95725E-06 | 1.013999963 | 0.034 | 0.003 | 0.122884581 | KO | Zc2hc1a      | 0.031 |
| Gm20517      | 3.9805E-06  | 1.143900285 | 0.034 | 0.003 | 0.123606383 | KO | Gm20517      | 0.031 |
| Fam171b      | 3.9805E-06  | 0.718665186 | 0.034 | 0.003 | 0.123606383 | KO | Fam171b      | 0.031 |
| Ccr3         | 4.73188E-06 | 2.105930509 | 0.029 | 0.002 | 0.146939093 | KO | Ccr3         | 0.027 |
| Kyat1        | 4.85495E-06 | 1.865865277 | 0.029 | 0.002 | 0.150760611 | KO | Kyat1        | 0.027 |
| Zbtb12       | 4.91928E-06 | 1.311879326 | 0.025 | 0.001 | 0.152758276 | KO | Zbtb12       | 0.024 |
| Tmprss3      | 4.94925E-06 | 1.585699893 | 0.029 | 0.002 | 0.153689027 | KO | Tmprss3      | 0.027 |
| Cyp11a1      | 4.95514E-06 | 2.74889045  | 0.025 | 0.001 | 0.153871859 | KO | Cyp11a1      | 0.024 |
| Gm3604       | 4.95514E-06 | 1.715412876 | 0.025 | 0.001 | 0.153871859 | KO | Gm3604       | 0.024 |
| Lig4         | 4.98107E-06 | 1.828999731 | 0.029 | 0.002 | 0.154677215 | KO | Lig4         | 0.027 |
| Gm14410      | 4.99125E-06 | 1.392276309 | 0.025 | 0.001 | 0.154993213 | KO | Gm14410      | 0.024 |
| 1700021A07R  | 4.99125E-06 | 1.351561962 | 0.025 | 0.001 | 0.154993213 | KO | 1700021A07R  | 0.024 |
| Lhpp         | 4.99125E-06 | 1.248013242 | 0.025 | 0.001 | 0.154993213 | KO | Lhpp         | 0.024 |
| Gm14698      | 4.99125E-06 | 1.12373009  | 0.025 | 0.001 | 0.154993213 | KO | Gm14698      | 0.024 |
| Gm29394      | 4.99125E-06 | 1.113144076 | 0.025 | 0.001 | 0.154993213 | KO | Gm29394      | 0.024 |
| Uprt         | 4.99125E-06 | 1.052386201 | 0.025 | 0.001 | 0.154993213 | KO | Uprt         | 0.024 |
| P2ry10b      | 4.99125E-06 | 1.017504186 | 0.025 | 0.001 | 0.154993213 | KO | P2ry10b      | 0.024 |
| Amdhd1       | 4.99125E-06 | 0.887373168 | 0.025 | 0.001 | 0.154993213 | KO | Amdhd1       | 0.024 |
| 4930590J08Ri | 4.99125E-06 | 0.776505419 | 0.025 | 0.001 | 0.154993213 | KO | 4930590J08Ri | 0.024 |
| B630019A10R  | 4.99125E-06 | 0.751415219 | 0.025 | 0.001 | 0.154993213 | KO | B630019A10R  | 0.024 |
| Tex15        | 5.01309E-06 | 1.436631068 | 0.029 | 0.002 | 0.155671485 | KO | Tex15        | 0.027 |
| Ppm1n        | 5.01309E-06 | 1.390591539 | 0.029 | 0.002 | 0.155671485 | KO | Ppm1n        | 0.027 |
| Tsacc        | 5.01309E-06 | 1.347011266 | 0.029 | 0.002 | 0.155671485 | KO | Tsacc        | 0.027 |
| Pank1        | 5.01309E-06 | 1.250912917 | 0.029 | 0.002 | 0.155671485 | KO | Pank1        | 0.027 |
| Efcab7       | 5.01309E-06 | 0.823874867 | 0.029 | 0.002 | 0.155671485 | KO | Efcab7       | 0.027 |
| C130013H08R  | 5.04531E-06 | 1.362180765 | 0.029 | 0.002 | 0.156671875 | KO | C130013H08R  | 0.027 |
| Heatr9       | 5.04531E-06 | 1.188736008 | 0.029 | 0.002 | 0.156671875 | KO | Heatr9       | 0.027 |
| Vsig10l      | 5.04531E-06 | 1.120138552 | 0.029 | 0.002 | 0.156671875 | KO | Vsig10l      | 0.027 |
| Actn2        | 5.04531E-06 | 0.789472198 | 0.029 | 0.002 | 0.156671875 | KO | Actn2        | 0.027 |
| Gm47769      | 5.04531E-06 | 0.764810035 | 0.029 | 0.002 | 0.156671875 | KO | Gm47769      | 0.027 |
| Sepsecs      | 5.17816E-06 | 0.967860223 | 0.067 | 0.015 | 0.160797357 | KO | Sepsecs      | 0.052 |
| Calclrl      | 5.39514E-06 | 0.821847666 | 0.067 | 0.015 | 0.167535359 | KO | Calclrl      | 0.052 |
| Znrf3        | 5.40346E-06 | 2.430388415 | 0.05  | 0.009 | 0.16779363  | KO | Znrf3        | 0.041 |
| Coil         | 5.70242E-06 | 1.459444244 | 0.071 | 0.017 | 0.177077211 | KO | Coil         | 0.054 |
| Ccdc73       | 5.73033E-06 | 0.98923406  | 0.05  | 0.009 | 0.177943898 | KO | Ccdc73       | 0.041 |
| Tlr12        | 6.44451E-06 | 1.337835561 | 0.042 | 0.006 | 0.200121293 | KO | Tlr12        | 0.036 |
| Mex3d        | 6.59987E-06 | 0.951218387 | 0.042 | 0.006 | 0.204945613 | KO | Mex3d        | 0.036 |
| Atat1        | 7.7746E-06  | 0.758376095 | 0.055 | 0.011 | 0.241424539 | KO | Atat1        | 0.044 |



|               |             |             |       |       |                |               |       |
|---------------|-------------|-------------|-------|-------|----------------|---------------|-------|
| Zfp428        | 7.83503E-06 | 0.76050752  | 0.055 | 0.011 | 0.243301275 KO | Zfp428        | 0.044 |
| Arsk          | 1.09125E-05 | 0.947073232 | 0.046 | 0.008 | 0.338867016 KO | Arsk          | 0.038 |
| Rasl11b       | 1.09628E-05 | 1.316570951 | 0.038 | 0.005 | 0.340427512 KO | Rasl11b       | 0.033 |
| Zfp60         | 1.09628E-05 | 1.002859341 | 0.038 | 0.005 | 0.340427512 KO | Zfp60         | 0.033 |
| Galnt9        | 1.10724E-05 | 1.432800374 | 0.038 | 0.005 | 0.343829885 KO | Galnt9        | 0.033 |
| Rsl1          | 1.10724E-05 | 0.847429063 | 0.038 | 0.005 | 0.343829885 KO | Rsl1          | 0.033 |
| 1700066B19R   | 1.11275E-05 | 1.10966667  | 0.038 | 0.005 | 0.345543222 KO | 1700066B19R   | 0.033 |
| Mrgpre        | 1.12946E-05 | 1.119974851 | 0.038 | 0.005 | 0.350732276 KO | Mrgpre        | 0.033 |
| A130010J15Ri  | 1.12946E-05 | 0.815716044 | 0.038 | 0.005 | 0.350732276 KO | A130010J15Ri  | 0.033 |
| Angptl2       | 1.39015E-05 | 1.729099824 | 0.05  | 0.01  | 0.431684621 KO | Angptl2       | 0.04  |
| Ccdc166       | 1.76273E-05 | 0.696393087 | 0.055 | 0.012 | 0.547379817 KO | Ccdc166       | 0.043 |
| Prdm9         | 1.81863E-05 | 1.735929864 | 0.034 | 0.004 | 0.564739045 KO | Prdm9         | 0.03  |
| Usp18         | 1.8378E-05  | 2.010481735 | 0.034 | 0.004 | 0.570691182 KO | Usp18         | 0.03  |
| Ficd          | 1.86203E-05 | 0.796722308 | 0.034 | 0.004 | 0.578214844 KO | Ficd          | 0.03  |
| 3110001I22Ril | 1.86691E-05 | 0.794016149 | 0.034 | 0.004 | 0.579731561 KO | 3110001I22Ril | 0.03  |
| Cd40lg        | 1.87671E-05 | 1.210139327 | 0.034 | 0.004 | 0.582775217 KO | Cd40lg        | 0.03  |
| Cdh17         | 1.87671E-05 | 1.151982388 | 0.034 | 0.004 | 0.582775217 KO | Cdh17         | 0.03  |
| Mgat3         | 1.89646E-05 | 1.272465404 | 0.034 | 0.004 | 0.588908253 KO | Mgat3         | 0.03  |
| Tctn1         | 1.90641E-05 | 0.723783328 | 0.034 | 0.004 | 0.591997776 KO | Tctn1         | 0.03  |
| Pkdcc         | 1.91641E-05 | 0.835460412 | 0.034 | 0.004 | 0.595102734 KO | Pkdcc         | 0.03  |
| Tnfrsf8       | 1.96258E-05 | 1.044448903 | 0.067 | 0.017 | 0.609439875 KO | Tnfrsf8       | 0.05  |
| Tnks1bp1      | 2.00377E-05 | 0.870670452 | 0.042 | 0.007 | 0.62223213 KO  | Tnks1bp1      | 0.035 |
| Slx1b         | 2.04826E-05 | 1.087094376 | 0.042 | 0.007 | 0.636045916 KO | Slx1b         | 0.035 |
| Tctn3         | 2.06631E-05 | 1.44050922  | 0.042 | 0.007 | 0.64165278 KO  | Tctn3         | 0.035 |
| Dph7          | 2.20205E-05 | 0.743725566 | 0.071 | 0.019 | 0.683802344 KO | Dph7          | 0.052 |
| Sirt5         | 2.85317E-05 | 1.49772147  | 0.046 | 0.009 | 0.885995185 KO | Sirt5         | 0.037 |
| 5830416I19Ril | 2.85549E-05 | 2.702034066 | 0.017 | 0     | 0.886714755 KO | 5830416I19Ril | 0.017 |
| Gm16230       | 2.85549E-05 | 2.246853603 | 0.017 | 0     | 0.886714755 KO | Gm16230       | 0.017 |
| Lsmem1        | 2.85549E-05 | 1.936542127 | 0.017 | 0     | 0.886714755 KO | Lsmem1        | 0.017 |
| Tmem220       | 2.85549E-05 | 1.870859667 | 0.017 | 0     | 0.886714755 KO | Tmem220       | 0.017 |
| Gm45351       | 2.85549E-05 | 1.855293919 | 0.017 | 0     | 0.886714755 KO | Gm45351       | 0.017 |
| Actbl2        | 2.85549E-05 | 1.841538205 | 0.017 | 0     | 0.886714755 KO | Actbl2        | 0.017 |
| Trbv20        | 2.85549E-05 | 1.820720235 | 0.017 | 0     | 0.886714755 KO | Trbv20        | 0.017 |
| Tprg          | 2.85549E-05 | 1.72705727  | 0.017 | 0     | 0.886714755 KO | Tprg          | 0.017 |
| Gm13522       | 2.85549E-05 | 1.602888375 | 0.017 | 0     | 0.886714755 KO | Gm13522       | 0.017 |
| Gm7334        | 2.85549E-05 | 1.552725649 | 0.017 | 0     | 0.886714755 KO | Gm7334        | 0.017 |
| Gm26756       | 2.85549E-05 | 1.490258978 | 0.017 | 0     | 0.886714755 KO | Gm26756       | 0.017 |
| Lrrc75aos2    | 2.85549E-05 | 1.489729968 | 0.017 | 0     | 0.886714755 KO | Lrrc75aos2    | 0.017 |
| Kcnf1         | 2.85549E-05 | 1.461135957 | 0.017 | 0     | 0.886714755 KO | Kcnf1         | 0.017 |
| A530040E14R   | 2.85549E-05 | 1.455588064 | 0.017 | 0     | 0.886714755 KO | A530040E14R   | 0.017 |
| Rpl13a-ps1    | 2.85549E-05 | 1.452621908 | 0.017 | 0     | 0.886714755 KO | Rpl13a-ps1    | 0.017 |
| Ehbp1         | 2.85549E-05 | 1.390609953 | 0.017 | 0     | 0.886714755 KO | Ehbp1         | 0.017 |
| Gm11767       | 2.85549E-05 | 1.294326255 | 0.017 | 0     | 0.886714755 KO | Gm11767       | 0.017 |
| Prss36        | 2.85549E-05 | 1.224065125 | 0.017 | 0     | 0.886714755 KO | Prss36        | 0.017 |
| CT030713.2    | 2.85549E-05 | 1.223141458 | 0.017 | 0     | 0.886714755 KO | CT030713.2    | 0.017 |
| Arhgap27os1   | 2.85549E-05 | 1.203780953 | 0.017 | 0     | 0.886714755 KO | Arhgap27os1   | 0.017 |
| Zfp459        | 2.85549E-05 | 1.196786447 | 0.017 | 0     | 0.886714755 KO | Zfp459        | 0.017 |
| Chl1          | 2.85549E-05 | 1.182744251 | 0.017 | 0     | 0.886714755 KO | Chl1          | 0.017 |
| Rbm3os        | 2.85549E-05 | 1.158372696 | 0.017 | 0     | 0.886714755 KO | Rbm3os        | 0.017 |
| Gm16894       | 2.85549E-05 | 1.128272336 | 0.017 | 0     | 0.886714755 KO | Gm16894       | 0.017 |
| Tcrg-C3       | 2.85549E-05 | 1.099845144 | 0.017 | 0     | 0.886714755 KO | Tcrg-C3       | 0.017 |

|              |             |             |       |       |             |    |              |       |
|--------------|-------------|-------------|-------|-------|-------------|----|--------------|-------|
| 9230111E07Ri | 2.85549E-05 | 1.090960343 | 0.017 | 0     | 0.886714755 | KO | 9230111E07Ri | 0.017 |
| Nup210l      | 2.85549E-05 | 1.044636814 | 0.017 | 0     | 0.886714755 | KO | Nup210l      | 0.017 |
| Afp          | 2.85549E-05 | 1.018454752 | 0.017 | 0     | 0.886714755 | KO | Afp          | 0.017 |
| Slc16a7      | 2.85549E-05 | 0.744894021 | 0.017 | 0     | 0.886714755 | KO | Slc16a7      | 0.017 |
| Nicn1        | 2.89187E-05 | 1.292315318 | 0.029 | 0.003 | 0.898011078 | KO | Nicn1        | 0.026 |
| Vdr          | 2.9245E-05  | 0.895503951 | 0.029 | 0.003 | 0.908144653 | KO | Vdr          | 0.026 |
| Pkd2         | 2.94095E-05 | 2.055751532 | 0.029 | 0.003 | 0.913252109 | KO | Pkd2         | 0.026 |
| Trim45       | 2.95748E-05 | 1.097076025 | 0.029 | 0.003 | 0.918386861 | KO | Trim45       | 0.026 |
| 5031425F14Ri | 2.95748E-05 | 0.75928099  | 0.029 | 0.003 | 0.918386861 | KO | 5031425F14Ri | 0.026 |
| Gm14419      | 2.97411E-05 | 0.925981662 | 0.029 | 0.003 | 0.923549046 | KO | Gm14419      | 0.026 |
| Gm48529      | 2.99082E-05 | 0.773533868 | 0.029 | 0.003 | 0.928738801 | KO | Gm48529      | 0.026 |
| Mrm2         | 3.80782E-05 | 0.715621204 | 0.038 | 0.006 | 1           | KO | Mrm2         | 0.032 |
| Mettl25      | 3.84246E-05 | 0.832590464 | 0.038 | 0.006 | 1           | KO | Mettl25      | 0.032 |
| Rpusd1       | 4.02497E-05 | 0.777598731 | 0.067 | 0.018 | 1           | KO | Rpusd1       | 0.049 |
| Dhdh         | 4.03896E-05 | 1.016982743 | 0.025 | 0.002 | 1           | KO | Dhdh         | 0.023 |
| Spsb1        | 4.08906E-05 | 2.14626955  | 0.025 | 0.002 | 1           | KO | Spsb1        | 0.023 |
| Mansc1       | 4.13974E-05 | 1.191188038 | 0.025 | 0.002 | 1           | KO | Mansc1       | 0.023 |
| Kank3        | 4.13974E-05 | 1.109474679 | 0.025 | 0.002 | 1           | KO | Kank3        | 0.023 |
| Cyb5rl       | 4.13974E-05 | 0.812261899 | 0.025 | 0.002 | 1           | KO | Cyb5rl       | 0.023 |
| Gm4673       | 4.14163E-05 | 0.962007557 | 0.055 | 0.013 | 1           | KO | Gm4673       | 0.042 |
| Lama5        | 4.16531E-05 | 0.713728851 | 0.025 | 0.002 | 1           | KO | Lama5        | 0.023 |
| Ifi202b      | 4.50973E-05 | 2.209311793 | 0.021 | 0.001 | 1           | KO | Ifi202b      | 0.02  |
| AF529169     | 4.54174E-05 | 1.149017621 | 0.021 | 0.001 | 1           | KO | AF529169     | 0.02  |
| Afmid        | 4.54174E-05 | 1.080476498 | 0.021 | 0.001 | 1           | KO | Afmid        | 0.02  |
| Ccl24        | 4.57396E-05 | 1.910206889 | 0.021 | 0.001 | 1           | KO | Ccl24        | 0.02  |
| Tmem91       | 4.57396E-05 | 1.843303885 | 0.021 | 0.001 | 1           | KO | Tmem91       | 0.02  |
| Gm26698      | 4.57396E-05 | 1.788488111 | 0.021 | 0.001 | 1           | KO | Gm26698      | 0.02  |
| Cdh23        | 4.57396E-05 | 1.530866521 | 0.021 | 0.001 | 1           | KO | Cdh23        | 0.02  |
| A530010L16Ri | 4.57396E-05 | 1.522004758 | 0.021 | 0.001 | 1           | KO | A530010L16Ri | 0.02  |
| Faxc         | 4.57396E-05 | 1.20013379  | 0.021 | 0.001 | 1           | KO | Faxc         | 0.02  |
| 2510017J16Ri | 4.6064E-05  | 1.809347773 | 0.021 | 0.001 | 1           | KO | 2510017J16Ri | 0.02  |
| Kif19a       | 4.6064E-05  | 1.520245082 | 0.021 | 0.001 | 1           | KO | Kif19a       | 0.02  |
| Capn5        | 4.6064E-05  | 1.427496597 | 0.021 | 0.001 | 1           | KO | Capn5        | 0.02  |
| 2410004P03R  | 4.6064E-05  | 1.388538181 | 0.021 | 0.001 | 1           | KO | 2410004P03R  | 0.02  |
| Gm31763      | 4.6064E-05  | 1.207101874 | 0.021 | 0.001 | 1           | KO | Gm31763      | 0.02  |
| Stc2         | 4.6064E-05  | 1.190932595 | 0.021 | 0.001 | 1           | KO | Stc2         | 0.02  |
| Megf11       | 4.6064E-05  | 1.131499493 | 0.021 | 0.001 | 1           | KO | Megf11       | 0.02  |
| Susd2        | 4.6064E-05  | 1.017678027 | 0.021 | 0.001 | 1           | KO | Susd2        | 0.02  |
| Rassf6       | 4.6064E-05  | 0.997214698 | 0.021 | 0.001 | 1           | KO | Rassf6       | 0.02  |
| Sv2a         | 4.6064E-05  | 0.937623398 | 0.021 | 0.001 | 1           | KO | Sv2a         | 0.02  |
| Pkn3         | 4.6064E-05  | 0.847820523 | 0.021 | 0.001 | 1           | KO | Pkn3         | 0.02  |
| Gnrh1        | 4.6064E-05  | 0.810012944 | 0.021 | 0.001 | 1           | KO | Gnrh1        | 0.02  |
| Sugct        | 4.6064E-05  | 0.753592512 | 0.021 | 0.001 | 1           | KO | Sugct        | 0.02  |
| Klhl30       | 4.6064E-05  | 0.706465488 | 0.021 | 0.001 | 1           | KO | Klhl30       | 0.02  |
| Tbc1d8b      | 5.70216E-05 | 1.677239975 | 0.042 | 0.008 | 1           | KO | Tbc1d8b      | 0.034 |
| Plxdc1       | 5.70216E-05 | 0.850735377 | 0.042 | 0.008 | 1           | KO | Plxdc1       | 0.034 |
| Wfs1         | 7.00393E-05 | 0.900352832 | 0.034 | 0.005 | 1           | KO | Wfs1         | 0.029 |
| Ckm          | 7.17065E-05 | 0.719938233 | 0.034 | 0.005 | 1           | KO | Ckm          | 0.029 |
| Zfp599       | 0.000106678 | 0.986166291 | 0.038 | 0.007 | 1           | KO | Zfp599       | 0.031 |
| Ankrd13d     | 0.000108015 | 1.691393296 | 0.038 | 0.007 | 1           | KO | Ankrd13d     | 0.031 |
| Fbxl4        | 0.000111195 | 1.107302034 | 0.038 | 0.007 | 1           | KO | Fbxl4        | 0.031 |

|              |             |             |       |       |      |              |       |
|--------------|-------------|-------------|-------|-------|------|--------------|-------|
| Nat8f4       | 0.000123791 | 0.728763386 | 0.029 | 0.004 | 1 KO | Nat8f4       | 0.025 |
| Krtcap3      | 0.000153172 | 1.037195412 | 0.046 | 0.011 | 1 KO | Krtcap3      | 0.035 |
| Ccdc171      | 0.000205616 | 1.304897026 | 0.025 | 0.003 | 1 KO | Ccdc171      | 0.022 |
| Nutf2        | 0.000208215 | 0.742719253 | 0.034 | 0.006 | 1 KO | Nutf2        | 0.028 |
| Pcna-ps2     | 0.000208917 | 1.039356749 | 0.025 | 0.003 | 1 KO | Pcna-ps2     | 0.022 |
| BC049715     | 0.000210029 | 1.065078798 | 0.025 | 0.003 | 1 KO | BC049715     | 0.022 |
| Ernm         | 0.000210029 | 1.02100669  | 0.025 | 0.003 | 1 KO | Ernm         | 0.022 |
| Mtrf1        | 0.000210895 | 0.97627844  | 0.034 | 0.006 | 1 KO | Mtrf1        | 0.028 |
| Gm15247      | 0.000211146 | 1.061155172 | 0.025 | 0.003 | 1 KO | Gm15247      | 0.022 |
| Mycl         | 0.000211146 | 1.019873255 | 0.025 | 0.003 | 1 KO | Mycl         | 0.022 |
| 1700019L13Ri | 0.000213397 | 0.797388013 | 0.025 | 0.003 | 1 KO | 1700019L13Ri | 0.022 |
| Zc4h2        | 0.000213397 | 0.761273365 | 0.025 | 0.003 | 1 KO | Zc4h2        | 0.022 |
| Slc5a6       | 0.000213397 | 0.758051433 | 0.025 | 0.003 | 1 KO | Slc5a6       | 0.022 |
| Gstk1        | 0.000213397 | 0.704858074 | 0.025 | 0.003 | 1 KO | Gstk1        | 0.022 |
| Stx3         | 0.00021453  | 1.01851552  | 0.025 | 0.003 | 1 KO | Stx3         | 0.022 |
| 2700081O15R  | 0.00021453  | 0.942537599 | 0.025 | 0.003 | 1 KO | 2700081O15R  | 0.022 |
| Rbm47        | 0.000265769 | 0.875863498 | 0.055 | 0.015 | 1 KO | Rbm47        | 0.04  |
| Zfp341       | 0.000275266 | 0.828945991 | 0.038 | 0.008 | 1 KO | Zfp341       | 0.03  |
| Rbm12b1      | 0.000279489 | 1.384437137 | 0.038 | 0.008 | 1 KO | Rbm12b1      | 0.03  |
| Selenoo      | 0.000289322 | 1.134722709 | 0.055 | 0.015 | 1 KO | Selenoo      | 0.04  |
| AC124490.1   | 0.000291946 | 1.957888441 | 0.013 | 0     | 1 KO | AC124490.1   | 0.013 |
| Ptch2        | 0.000291946 | 1.743199732 | 0.013 | 0     | 1 KO | Ptch2        | 0.013 |
| Gm48089      | 0.000291946 | 1.672497241 | 0.013 | 0     | 1 KO | Gm48089      | 0.013 |
| Slc7a2       | 0.000291946 | 1.578061238 | 0.013 | 0     | 1 KO | Slc7a2       | 0.013 |
| Slc30a3      | 0.000291946 | 1.570208155 | 0.013 | 0     | 1 KO | Slc30a3      | 0.013 |
| Trav7-4      | 0.000291946 | 1.499301314 | 0.013 | 0     | 1 KO | Trav7-4      | 0.013 |
| Derl3        | 0.000291946 | 1.473897899 | 0.013 | 0     | 1 KO | Derl3        | 0.013 |
| 2900089D17R  | 0.000291946 | 1.446026351 | 0.013 | 0     | 1 KO | 2900089D17R  | 0.013 |
| Gm6634       | 0.000291946 | 1.371181721 | 0.013 | 0     | 1 KO | Gm6634       | 0.013 |
| Gm36839      | 0.000291946 | 1.359559156 | 0.013 | 0     | 1 KO | Gm36839      | 0.013 |
| Apoc1        | 0.000291946 | 1.293709637 | 0.013 | 0     | 1 KO | Apoc1        | 0.013 |
| Gm614        | 0.000291946 | 1.213795244 | 0.013 | 0     | 1 KO | Gm614        | 0.013 |
| Gm9947       | 0.000291946 | 1.205752838 | 0.013 | 0     | 1 KO | Gm9947       | 0.013 |
| Actrt3       | 0.000291946 | 1.12135346  | 0.013 | 0     | 1 KO | Actrt3       | 0.013 |
| Gm36198      | 0.000291946 | 1.0690527   | 0.013 | 0     | 1 KO | Gm36198      | 0.013 |
| Trbv13-2     | 0.000291946 | 1.042983131 | 0.013 | 0     | 1 KO | Trbv13-2     | 0.013 |
| Gm40304      | 0.000291946 | 1.033937989 | 0.013 | 0     | 1 KO | Gm40304      | 0.013 |
| Cntfr        | 0.000291946 | 1.021698075 | 0.013 | 0     | 1 KO | Cntfr        | 0.013 |
| Hc           | 0.000291946 | 1.019023922 | 0.013 | 0     | 1 KO | Hc           | 0.013 |
| Gm47802      | 0.000291946 | 1.016786799 | 0.013 | 0     | 1 KO | Gm47802      | 0.013 |
| C78859       | 0.000291946 | 1.002884123 | 0.013 | 0     | 1 KO | C78859       | 0.013 |
| Unc5a        | 0.000291946 | 0.998658829 | 0.013 | 0     | 1 KO | Unc5a        | 0.013 |
| Antxr1       | 0.000291946 | 0.938436661 | 0.013 | 0     | 1 KO | Antxr1       | 0.013 |
| Tub          | 0.000291946 | 0.934030538 | 0.013 | 0     | 1 KO | Tub          | 0.013 |
| Sox5         | 0.000291946 | 0.914222941 | 0.013 | 0     | 1 KO | Sox5         | 0.013 |
| Colq         | 0.000291946 | 0.902551728 | 0.013 | 0     | 1 KO | Colq         | 0.013 |
| Slc2a12      | 0.000291946 | 0.896357852 | 0.013 | 0     | 1 KO | Slc2a12      | 0.013 |
| Fam131a      | 0.000291946 | 0.896042926 | 0.013 | 0     | 1 KO | Fam131a      | 0.013 |
| Gm12185      | 0.000291946 | 0.89322257  | 0.013 | 0     | 1 KO | Gm12185      | 0.013 |
| Zfp972       | 0.000291946 | 0.882514707 | 0.013 | 0     | 1 KO | Zfp972       | 0.013 |
| Gm30214      | 0.000291946 | 0.85853208  | 0.013 | 0     | 1 KO | Gm30214      | 0.013 |

|              |             |             |       |       |      |              |       |
|--------------|-------------|-------------|-------|-------|------|--------------|-------|
| Hoxb6        | 0.000291946 | 0.846112537 | 0.013 | 0     | 1 KO | Hoxb6        | 0.013 |
| Cage1        | 0.000291946 | 0.836704338 | 0.013 | 0     | 1 KO | Cage1        | 0.013 |
| D430019H16F  | 0.000291946 | 0.831850287 | 0.013 | 0     | 1 KO | D430019H16F  | 0.013 |
| Mmp10        | 0.000291946 | 0.787535283 | 0.013 | 0     | 1 KO | Mmp10        | 0.013 |
| Slc6a11      | 0.000291946 | 0.768859871 | 0.013 | 0     | 1 KO | Slc6a11      | 0.013 |
| 2700016F22Ri | 0.000291946 | 0.759900146 | 0.013 | 0     | 1 KO | 2700016F22Ri | 0.013 |
| Pip5k1b      | 0.000291946 | 0.748278118 | 0.013 | 0     | 1 KO | Pip5k1b      | 0.013 |
| Gm14391      | 0.000291946 | 0.73599013  | 0.013 | 0     | 1 KO | Gm14391      | 0.013 |
| Nutf2-ps1    | 0.000291946 | 0.735767491 | 0.013 | 0     | 1 KO | Nutf2-ps1    | 0.013 |
| Gm7125       | 0.000291946 | 0.724834207 | 0.013 | 0     | 1 KO | Gm7125       | 0.013 |
| Gm2245       | 0.000291946 | 0.716721786 | 0.013 | 0     | 1 KO | Gm2245       | 0.013 |
| Il6          | 0.000291946 | 0.698395336 | 0.013 | 0     | 1 KO | Il6          | 0.013 |
| Gm49207      | 0.000291946 | 0.696292317 | 0.013 | 0     | 1 KO | Gm49207      | 0.013 |
| Cpm          | 0.000315642 | 1.293182546 | 0.042 | 0.01  | 1 KO | Cpm          | 0.032 |
| Il23a        | 0.000324376 | 0.98707266  | 0.021 | 0.002 | 1 KO | Il23a        | 0.019 |
| Gm9803       | 0.000326279 | 1.207937718 | 0.021 | 0.002 | 1 KO | Gm9803       | 0.019 |
| Gm14508      | 0.000328192 | 1.958078356 | 0.021 | 0.002 | 1 KO | Gm14508      | 0.019 |
| Zbed5        | 0.000328192 | 1.170626918 | 0.021 | 0.002 | 1 KO | Zbed5        | 0.019 |
| Gm6225       | 0.000330116 | 1.152961339 | 0.021 | 0.002 | 1 KO | Gm6225       | 0.019 |
| Slc9a7       | 0.000330116 | 0.943101212 | 0.021 | 0.002 | 1 KO | Slc9a7       | 0.019 |
| Gm13546      | 0.000330116 | 0.883892362 | 0.021 | 0.002 | 1 KO | Gm13546      | 0.019 |
| Nphp4        | 0.000330116 | 0.706209054 | 0.021 | 0.002 | 1 KO | Nphp4        | 0.019 |
| Smim24       | 0.00033205  | 0.994717125 | 0.021 | 0.002 | 1 KO | Smim24       | 0.019 |
| Gm26610      | 0.00033205  | 0.833127351 | 0.021 | 0.002 | 1 KO | Gm26610      | 0.019 |
| Myo3b        | 0.00033205  | 0.792288651 | 0.021 | 0.002 | 1 KO | Myo3b        | 0.019 |
| Slc6a20b     | 0.00033205  | 0.751961286 | 0.021 | 0.002 | 1 KO | Slc6a20b     | 0.019 |
| Actr3b       | 0.000407908 | 0.822064798 | 0.029 | 0.005 | 1 KO | Actr3b       | 0.024 |
| Gdpgp1       | 0.000407908 | 0.693451987 | 0.029 | 0.005 | 1 KO | Gdpgp1       | 0.024 |
| Ica1l        | 0.000411521 | 1.021106802 | 0.029 | 0.005 | 1 KO | Ica1l        | 0.024 |
| Atf7ip2      | 0.000413339 | 0.700535274 | 0.029 | 0.005 | 1 KO | Atf7ip2      | 0.024 |
| Gm34093      | 0.000415404 | 1.750927622 | 0.017 | 0.001 | 1 KO | Gm34093      | 0.016 |
| Nos1         | 0.000415404 | 1.65357066  | 0.017 | 0.001 | 1 KO | Nos1         | 0.016 |
| Lim2         | 0.000415404 | 1.158941324 | 0.017 | 0.001 | 1 KO | Lim2         | 0.016 |
| Star         | 0.000415404 | 0.998759098 | 0.017 | 0.001 | 1 KO | Star         | 0.016 |
| Dsp          | 0.000418241 | 2.881959139 | 0.017 | 0.001 | 1 KO | Dsp          | 0.016 |
| Hcn2         | 0.000418241 | 2.363431761 | 0.017 | 0.001 | 1 KO | Hcn2         | 0.016 |
| Pde10a       | 0.000418241 | 1.218295448 | 0.017 | 0.001 | 1 KO | Pde10a       | 0.016 |
| Mpzl2        | 0.000421095 | 1.541378096 | 0.017 | 0.001 | 1 KO | Mpzl2        | 0.016 |
| Fbxl22       | 0.000421095 | 1.227423831 | 0.017 | 0.001 | 1 KO | Fbxl22       | 0.016 |
| Gm6712       | 0.000421095 | 1.141457718 | 0.017 | 0.001 | 1 KO | Gm6712       | 0.016 |
| Gm43057      | 0.000421095 | 1.130702556 | 0.017 | 0.001 | 1 KO | Gm43057      | 0.016 |
| Gm14718      | 0.000421095 | 1.128686851 | 0.017 | 0.001 | 1 KO | Gm14718      | 0.016 |
| Mogat1       | 0.000421095 | 1.098701632 | 0.017 | 0.001 | 1 KO | Mogat1       | 0.016 |
| Cnih3        | 0.000421095 | 1.086807934 | 0.017 | 0.001 | 1 KO | Cnih3        | 0.016 |
| Gm27029      | 0.000421095 | 1.083649725 | 0.017 | 0.001 | 1 KO | Gm27029      | 0.016 |
| Pcyt1b       | 0.000421095 | 1.022979752 | 0.017 | 0.001 | 1 KO | Pcyt1b       | 0.016 |
| Tssk4        | 0.000421095 | 0.999355802 | 0.017 | 0.001 | 1 KO | Tssk4        | 0.016 |
| 3110070M22F  | 0.000421095 | 0.961171849 | 0.017 | 0.001 | 1 KO | 3110070M22F  | 0.016 |
| Gm10131      | 0.000421095 | 0.93839558  | 0.017 | 0.001 | 1 KO | Gm10131      | 0.016 |
| Sarm1        | 0.000421095 | 0.932396994 | 0.017 | 0.001 | 1 KO | Sarm1        | 0.016 |
| 4930535E02Ri | 0.000421095 | 0.924147833 | 0.017 | 0.001 | 1 KO | 4930535E02Ri | 0.016 |

|               |             |             |       |       |      |               |       |
|---------------|-------------|-------------|-------|-------|------|---------------|-------|
| Fndc10        | 0.000421095 | 0.900022288 | 0.017 | 0.001 | 1 KO | Fndc10        | 0.016 |
| Gm10501       | 0.000421095 | 0.886903154 | 0.017 | 0.001 | 1 KO | Gm10501       | 0.016 |
| Xylb          | 0.000421095 | 0.859973268 | 0.017 | 0.001 | 1 KO | Xylb          | 0.016 |
| Ccno          | 0.000421095 | 0.859921899 | 0.017 | 0.001 | 1 KO | Ccno          | 0.016 |
| C230037L18Ri  | 0.000421095 | 0.856713883 | 0.017 | 0.001 | 1 KO | C230037L18Ri  | 0.016 |
| Gm15265       | 0.000421095 | 0.819141649 | 0.017 | 0.001 | 1 KO | Gm15265       | 0.016 |
| Disc1         | 0.000421095 | 0.791347475 | 0.017 | 0.001 | 1 KO | Disc1         | 0.016 |
| Gm28874       | 0.000421095 | 0.704411353 | 0.017 | 0.001 | 1 KO | Gm28874       | 0.016 |
| Pros1         | 0.000548029 | 0.896332374 | 0.034 | 0.007 | 1 KO | Pros1         | 0.027 |
| Gm45871       | 0.000550155 | 0.915954941 | 0.034 | 0.007 | 1 KO | Gm45871       | 0.027 |
| Klf8          | 0.000556579 | 1.015778545 | 0.034 | 0.007 | 1 KO | Klf8          | 0.027 |
| Olfm1         | 0.000583071 | 1.057395369 | 0.05  | 0.014 | 1 KO | Olfm1         | 0.036 |
| Il18bp        | 0.000642736 | 1.253962989 | 0.038 | 0.009 | 1 KO | Il18bp        | 0.029 |
| Cuedc1        | 0.000660958 | 1.075509101 | 0.042 | 0.011 | 1 KO | Cuedc1        | 0.031 |
| Camk2n2       | 0.000766218 | 0.809885278 | 0.025 | 0.004 | 1 KO | Camk2n2       | 0.021 |
| Hsf4          | 0.000769768 | 1.33174407  | 0.025 | 0.004 | 1 KO | Hsf4          | 0.021 |
| Msc           | 0.000773334 | 1.007952058 | 0.025 | 0.004 | 1 KO | Msc           | 0.021 |
| Vipr2         | 0.000776914 | 0.765617955 | 0.025 | 0.004 | 1 KO | Vipr2         | 0.021 |
| Nudt15        | 0.001073857 | 0.848438387 | 0.029 | 0.006 | 1 KO | Nudt15        | 0.023 |
| Slc26a11      | 0.001104013 | 0.987388615 | 0.029 | 0.006 | 1 KO | Slc26a11      | 0.023 |
| Dglucy        | 0.001291914 | 1.242511477 | 0.038 | 0.01  | 1 KO | Dglucy        | 0.028 |
| Cxcl3         | 0.001348654 | 1.838230586 | 0.055 | 0.018 | 1 KO | Cxcl3         | 0.037 |
| Zfp623        | 0.001424898 | 1.940132607 | 0.021 | 0.003 | 1 KO | Zfp623        | 0.018 |
| Gm49180       | 0.001424898 | 1.590748712 | 0.021 | 0.003 | 1 KO | Gm49180       | 0.018 |
| Anpep         | 0.00143194  | 1.003212124 | 0.021 | 0.003 | 1 KO | Anpep         | 0.018 |
| Ino80dos      | 0.00143194  | 0.960350249 | 0.021 | 0.003 | 1 KO | Ino80dos      | 0.018 |
| 1110035H17R   | 0.00143194  | 0.854827713 | 0.021 | 0.003 | 1 KO | 1110035H17R   | 0.018 |
| Angel1        | 0.001439014 | 0.844750484 | 0.021 | 0.003 | 1 KO | Angel1        | 0.018 |
| Lipt1         | 0.001439014 | 0.777600439 | 0.021 | 0.003 | 1 KO | Lipt1         | 0.018 |
| Aste1         | 0.001759683 | 0.963520505 | 0.05  | 0.016 | 1 KO | Aste1         | 0.034 |
| Gm8817        | 0.002188577 | 0.921831979 | 0.025 | 0.005 | 1 KO | Gm8817        | 0.02  |
| Gm47438       | 0.002206444 | 0.877192507 | 0.025 | 0.005 | 1 KO | Gm47438       | 0.02  |
| Nudt10        | 0.002421031 | 1.326115878 | 0.017 | 0.002 | 1 KO | Nudt10        | 0.015 |
| Gfod2         | 0.002460906 | 0.995980173 | 0.017 | 0.002 | 1 KO | Gfod2         | 0.015 |
| Crabp2        | 0.00247433  | 2.354917502 | 0.017 | 0.002 | 1 KO | Crabp2        | 0.015 |
| Mtus1         | 0.00247433  | 1.945445006 | 0.017 | 0.002 | 1 KO | Mtus1         | 0.015 |
| Bahcc1        | 0.002487822 | 2.532520892 | 0.017 | 0.002 | 1 KO | Bahcc1        | 0.015 |
| Gm26884       | 0.002487822 | 1.349387904 | 0.017 | 0.002 | 1 KO | Gm26884       | 0.015 |
| Rgs9          | 0.002487822 | 1.177126775 | 0.017 | 0.002 | 1 KO | Rgs9          | 0.015 |
| Gm26720       | 0.002487822 | 1.141613598 | 0.017 | 0.002 | 1 KO | Gm26720       | 0.015 |
| 4930518I15Ril | 0.002487822 | 1.077505877 | 0.017 | 0.002 | 1 KO | 4930518I15Ril | 0.015 |
| Jam2          | 0.002501381 | 1.059639523 | 0.017 | 0.002 | 1 KO | Jam2          | 0.015 |
| Vash1         | 0.002501381 | 0.970429943 | 0.017 | 0.002 | 1 KO | Vash1         | 0.015 |
| Gm15492       | 0.002501381 | 0.766963183 | 0.017 | 0.002 | 1 KO | Gm15492       | 0.015 |
| Gm15445       | 0.002515008 | 0.941925282 | 0.017 | 0.002 | 1 KO | Gm15445       | 0.015 |
| Ctdspl        | 0.002515008 | 0.864302118 | 0.017 | 0.002 | 1 KO | Ctdspl        | 0.015 |
| Gm14966       | 0.002515008 | 0.857737836 | 0.017 | 0.002 | 1 KO | Gm14966       | 0.015 |
| 4933406I18Ril | 0.002515008 | 0.823260593 | 0.017 | 0.002 | 1 KO | 4933406I18Ril | 0.015 |
| Adora3        | 0.002515008 | 0.816186029 | 0.017 | 0.002 | 1 KO | Adora3        | 0.015 |
| Fam83g        | 0.002515008 | 0.713306234 | 0.017 | 0.002 | 1 KO | Fam83g        | 0.015 |
| Mast4         | 0.002615851 | 1.30533544  | 0.034 | 0.009 | 1 KO | Mast4         | 0.025 |

|             |             |             |       |       |      |             |       |
|-------------|-------------|-------------|-------|-------|------|-------------|-------|
| Acot1       | 0.003710039 | 1.124073449 | 0.013 | 0.001 | 1 KO | Acot1       | 0.012 |
| Gm26541     | 0.003710039 | 1.106426605 | 0.013 | 0.001 | 1 KO | Gm26541     | 0.012 |
| Hus1b       | 0.003733394 | 1.511682618 | 0.013 | 0.001 | 1 KO | Hus1b       | 0.012 |
| Aldh4a1     | 0.003757981 | 2.555374083 | 0.013 | 0.001 | 1 KO | Aldh4a1     | 0.012 |
| Tchh        | 0.003757981 | 2.384720175 | 0.013 | 0.001 | 1 KO | Tchh        | 0.012 |
| St8sia6     | 0.003757981 | 1.272906016 | 0.013 | 0.001 | 1 KO | St8sia6     | 0.012 |
| Gm28043     | 0.003757981 | 1.25168976  | 0.013 | 0.001 | 1 KO | Gm28043     | 0.012 |
| Fam212b     | 0.003757981 | 1.099396296 | 0.013 | 0.001 | 1 KO | Fam212b     | 0.012 |
| Ccdc173     | 0.003757981 | 0.961804844 | 0.013 | 0.001 | 1 KO | Ccdc173     | 0.012 |
| Fcrl1       | 0.003757981 | 0.917516518 | 0.013 | 0.001 | 1 KO | Fcrl1       | 0.012 |
| Siah3       | 0.003757981 | 0.797097671 | 0.013 | 0.001 | 1 KO | Siah3       | 0.012 |
| Pou2af1     | 0.003782163 | 1.193389781 | 0.013 | 0.001 | 1 KO | Pou2af1     | 0.012 |
| Oas2        | 0.003782163 | 1.15392568  | 0.013 | 0.001 | 1 KO | Oas2        | 0.012 |
| Tnfaip6     | 0.003782163 | 1.053250419 | 0.013 | 0.001 | 1 KO | Tnfaip6     | 0.012 |
| Gm26664     | 0.003782163 | 1.012860136 | 0.013 | 0.001 | 1 KO | Gm26664     | 0.012 |
| Klrc3       | 0.003782163 | 0.990526525 | 0.013 | 0.001 | 1 KO | Klrc3       | 0.012 |
| Pde4c       | 0.003782163 | 0.953331727 | 0.013 | 0.001 | 1 KO | Pde4c       | 0.012 |
| Col14a1     | 0.003782163 | 0.921260205 | 0.013 | 0.001 | 1 KO | Col14a1     | 0.012 |
| Fbxo41      | 0.003782163 | 0.912299359 | 0.013 | 0.001 | 1 KO | Fbxo41      | 0.012 |
| Pcdhgc5     | 0.003782163 | 0.853671331 | 0.013 | 0.001 | 1 KO | Pcdhgc5     | 0.012 |
| Gm19325     | 0.003782163 | 0.823329566 | 0.013 | 0.001 | 1 KO | Gm19325     | 0.012 |
| Plscr2      | 0.003782163 | 0.822982188 | 0.013 | 0.001 | 1 KO | Plscr2      | 0.012 |
| Gm26764     | 0.003782163 | 0.807777042 | 0.013 | 0.001 | 1 KO | Gm26764     | 0.012 |
| B230208H11R | 0.003782163 | 0.801670538 | 0.013 | 0.001 | 1 KO | B230208H11R | 0.012 |
| Wdr78       | 0.003782163 | 0.772321956 | 0.013 | 0.001 | 1 KO | Wdr78       | 0.012 |
| Gm38394     | 0.003782163 | 0.76803186  | 0.013 | 0.001 | 1 KO | Gm38394     | 0.012 |
| Twist1      | 0.003782163 | 0.762471794 | 0.013 | 0.001 | 1 KO | Twist1      | 0.012 |
| 4930537H2OR | 0.003782163 | 0.756664031 | 0.013 | 0.001 | 1 KO | 4930537H2OR | 0.012 |
| Pdzk1       | 0.003782163 | 0.745082914 | 0.013 | 0.001 | 1 KO | Pdzk1       | 0.012 |
| Pi16        | 0.003782163 | 0.734853576 | 0.013 | 0.001 | 1 KO | Pi16        | 0.012 |
| Siglecg     | 0.003782163 | 0.69677332  | 0.013 | 0.001 | 1 KO | Siglecg     | 0.012 |
| Tbc1d9      | 0.004385179 | 1.332709625 | 0.021 | 0.004 | 1 KO | Tbc1d9      | 0.017 |
| Zfp971      | 0.004385179 | 0.951162728 | 0.021 | 0.004 | 1 KO | Zfp971      | 0.017 |
| Car12       | 0.004385179 | 0.826408677 | 0.021 | 0.004 | 1 KO | Car12       | 0.017 |
| Fam129c     | 0.004403742 | 1.025850668 | 0.021 | 0.004 | 1 KO | Fam129c     | 0.017 |
| Popdc2      | 0.004422376 | 0.70528869  | 0.021 | 0.004 | 1 KO | Popdc2      | 0.017 |
| Mrnip       | 0.004887424 | 0.854461803 | 0.034 | 0.01  | 1 KO | Mrnip       | 0.024 |
| Lipo3       | 0.005049342 | 1.317080695 | 0.034 | 0.01  | 1 KO | Lipo3       | 0.024 |
| Wars2       | 0.005183328 | 0.729086699 | 0.025 | 0.006 | 1 KO | Wars2       | 0.019 |
| Gm46430     | 0.005232875 | 1.237703459 | 0.029 | 0.008 | 1 KO | Gm46430     | 0.021 |
| Gm11579     | 0.005277537 | 0.870447521 | 0.025 | 0.006 | 1 KO | Gm11579     | 0.019 |
| Cxcl5       | 0.008785241 | 1.05538736  | 0.017 | 0.003 | 1 KO | Cxcl5       | 0.014 |
| Pard6g      | 0.00880243  | 0.927660024 | 0.034 | 0.011 | 1 KO | Pard6g      | 0.023 |
| Tert        | 0.008824558 | 1.630764773 | 0.017 | 0.003 | 1 KO | Tert        | 0.014 |
| Casc1       | 0.008824558 | 1.09680797  | 0.017 | 0.003 | 1 KO | Casc1       | 0.014 |
| Zfp354c     | 0.008824558 | 0.970446468 | 0.017 | 0.003 | 1 KO | Zfp354c     | 0.014 |
| Trim7       | 0.008864031 | 0.903672182 | 0.017 | 0.003 | 1 KO | Trim7       | 0.014 |
| Slc30a2     | 0.008864031 | 0.841878347 | 0.017 | 0.003 | 1 KO | Slc30a2     | 0.014 |
| Xkr6        | 0.008864031 | 0.7769946   | 0.017 | 0.003 | 1 KO | Xkr6        | 0.014 |
| Rab32       | 0.009854512 | 1.033023701 | 0.029 | 0.009 | 1 KO | Rab32       | 0.02  |
