# Supplementary material
Source: PubMed Central journal article supplement (PMC8940682)
Supplement: NIHMS1773905-supplement-22.pdf [file NIHMS1773905-supplement-22.pdf]

**Supplemental Table 10. Gene Expression Fold Change in Macrophages of WT vs. RNLS KO tumors**

| gene_name | p_val       | avg_log2FC | pct.1      | pct.2 | p_val_adj   | cluster | gene     | pct.diff |
|-----------|-------------|------------|------------|-------|-------------|---------|----------|----------|
| Hbb-bs    |             | 0          | 3.05392174 | 0.997 | 0.478       | 0 WT    | Hbb-bs   | 0.519    |
| mt-Atp8   | 1.4322E-299 | 3.5400738  | 0.973      | 0.633 | 4.4474E-295 | WT      | mt-Atp8  | 0.34     |
| Hbb-bt    | 8.3899E-286 | 4.64290415 | 0.882      | 0.105 | 2.6053E-281 | WT      | Hbb-bt   | 0.777    |
| mt-Atp6   | 9.9112E-282 | 2.02219781 | 1          | 0.988 | 3.0777E-277 | WT      | mt-Atp6  | 0.012    |
| Hba-a1    | 2.8614E-264 | 3.30639723 | 0.877      | 0.159 | 8.8856E-260 | WT      | Hba-a1   | 0.718    |
| Hba-a2    | 2.9578E-228 | 3.09266581 | 0.802      | 0.119 | 9.1849E-224 | WT      | Hba-a2   | 0.683    |
| Lgals1    | 3.9256E-197 | 1.76786048 | 0.948      | 0.832 | 1.219E-192  | WT      | Lgals1   | 0.116    |
| Rps2      | 1.9901E-192 | 1.47638261 | 0.956      | 0.834 | 6.1799E-188 | WT      | Rps2     | 0.122    |
| mt-Nd4l   | 1.291E-191  | 2.53853582 | 0.914      | 0.622 | 4.009E-187  | WT      | mt-Nd4l  | 0.292    |
| Rpl13     | 3.9058E-191 | 1.07984888 | 0.986      | 0.96  | 1.2129E-186 | WT      | Rpl13    | 0.026    |
| Rpl11     | 5.0026E-184 | 1.16643932 | 0.965      | 0.879 | 1.5535E-179 | WT      | Rpl11    | 0.086    |
| Sh3bgrl3  | 2.0357E-179 | 1.51706195 | 0.922      | 0.802 | 6.3213E-175 | WT      | Sh3bgrl3 | 0.12     |
| Rpl32     | 4.9904E-164 | 1.00436861 | 0.974      | 0.941 | 1.5497E-159 | WT      | Rpl32    | 0.033    |
| mt-Nd5    | 1.4275E-161 | 2.15257468 | 0.932      | 0.757 | 4.4327E-157 | WT      | mt-Nd5   | 0.175    |
| Gapdh     | 2.1247E-160 | 1.24753468 | 0.986      | 0.853 | 6.5978E-156 | WT      | Gapdh    | 0.133    |
| Rpl18     | 6.2987E-157 | 1.08150103 | 0.961      | 0.891 | 1.9559E-152 | WT      | Rpl18    | 0.07     |
| Rps18     | 1.6364E-153 | 1.2450785  | 0.947      | 0.868 | 5.0814E-149 | WT      | Rps18    | 0.079    |
| Rpl18a    | 2.9866E-150 | 0.9267398  | 0.977      | 0.931 | 9.2744E-146 | WT      | Rpl18a   | 0.046    |
| Rpl26     | 2.9499E-148 | 0.93071737 | 0.968      | 0.892 | 9.1604E-144 | WT      | Rpl26    | 0.076    |
| mt-Co3    | 1.2399E-143 | 1.12676419 | 1          | 0.991 | 3.8502E-139 | WT      | mt-Co3   | 0.009    |
| mt-Co2    | 2.7185E-141 | 1.06254467 | 1          | 0.987 | 8.4417E-137 | WT      | mt-Co2   | 0.013    |
| Rpl15     | 8.8642E-140 | 1.13753106 | 0.931      | 0.874 | 2.7526E-135 | WT      | Rpl15    | 0.057    |
| Rpl28     | 3.3448E-139 | 0.93128441 | 0.961      | 0.909 | 1.0387E-134 | WT      | Rpl28    | 0.052    |
| Rpl8      | 4.0025E-136 | 0.95017635 | 0.962      | 0.937 | 1.2429E-131 | WT      | Rpl8     | 0.025    |
| Rpl12     | 2.7587E-133 | 1.14889572 | 0.916      | 0.85  | 8.5665E-129 | WT      | Rpl12    | 0.066    |
| mt-Cytb   | 4.7698E-132 | 1.21997863 | 0.999      | 0.968 | 1.4812E-127 | WT      | mt-Cytb  | 0.031    |
| Rps3      | 7.802E-131  | 1.04941831 | 0.941      | 0.881 | 2.4228E-126 | WT      | Rps3     | 0.06     |
| Rplp0     | 2.9199E-129 | 0.99632161 | 0.962      | 0.931 | 9.067E-125  | WT      | Rplp0    | 0.031    |
| Rbm3      | 7.1301E-128 | 1.27467463 | 0.883      | 0.842 | 2.2141E-123 | WT      | Rbm3     | 0.041    |
| Rpl36     | 1.4349E-127 | 0.8452235  | 0.971      | 0.916 | 4.4559E-123 | WT      | Rpl36    | 0.055    |
| Rpl21     | 1.1368E-123 | 1.11514115 | 0.909      | 0.833 | 3.5302E-119 | WT      | Rpl21    | 0.076    |
| Ppia      | 8.2849E-123 | 0.9533389  | 0.97       | 0.952 | 2.5727E-118 | WT      | Ppia     | 0.018    |
| Rps11     | 5.832E-118  | 0.84447118 | 0.961      | 0.923 | 1.811E-113  | WT      | Rps11    | 0.038    |
| Rpl14     | 1.9029E-115 | 1.00099102 | 0.907      | 0.858 | 5.909E-111  | WT      | Rpl14    | 0.049    |
| Rpl29     | 3.8461E-113 | 1.16161596 | 0.874      | 0.778 | 1.1943E-108 | WT      | Rpl29    | 0.096    |
| Rps19     | 3.6589E-106 | 0.73556793 | 0.976      | 0.951 | 1.1362E-101 | WT      | Rps19    | 0.025    |
| Rpl39     | 1.7512E-105 | 0.71681099 | 0.972      | 0.935 | 5.4379E-101 | WT      | Rpl39    | 0.037    |
| Rpl24     | 8.3501E-103 | 0.77044023 | 0.946      | 0.915 | 2.59297E-98 | WT      | Rpl24    | 0.031    |
| Clic1     | 5.0151E-102 | 1.33368944 | 0.825      | 0.73  | 1.55734E-97 | WT      | Clic1    | 0.095    |
| Rpl22l1   | 2.38495E-92 | 1.36827949 | 0.809      | 0.668 | 7.40599E-88 | WT      | Rpl22l1  | 0.141    |
| Rps15a    | 9.56181E-91 | 0.74998405 | 0.964      | 0.884 | 2.96923E-86 | WT      | Rps15a   | 0.08     |
| Ubb       | 2.1196E-90  | 0.96001423 | 0.939      | 0.857 | 6.58199E-86 | WT      | Ubb      | 0.082    |
| Xist      | 1.08621E-84 | 1.1948465  | 0.879      | 0.753 | 3.37301E-80 | WT      | Xist     | 0.126    |
| Fcer1g    | 4.77799E-82 | 0.78604029 | 0.944      | 0.891 | 1.48371E-77 | WT      | Fcer1g   | 0.053    |
| Atp5g1    | 5.4795E-81  | 1.40597769 | 0.754      | 0.656 | 1.70155E-76 | WT      | Atp5g1   | 0.098    |
| Mif       | 2.85621E-80 | 1.04505819 | 0.927      | 0.817 | 8.86938E-76 | WT      | Mif      | 0.11     |
| Pfn1      | 2.38536E-78 | 0.72433595 | 0.933      | 0.931 | 7.40726E-74 | WT      | Pfn1     | 0.002    |
| Rps5      | 3.5686E-76  | 0.70390628 | 0.942      | 0.927 | 1.10816E-71 | WT      | Rps5     | 0.015    |
| Rpl10a    | 6.079E-76   | 0.74147673 | 0.926      | 0.903 | 1.88771E-71 | WT      | Rpl10a   | 0.023    |
| H3f3a     | 7.99822E-75 | 0.75759404 | 0.931      | 0.892 | 2.48369E-70 | WT      | H3f3a    | 0.039    |
| Elob      | 1.42823E-74 | 1.01323688 | 0.819      | 0.73  | 4.43509E-70 | WT      | Elob     | 0.089    |

|             |             |            |       |       |             |    |            |        |
|-------------|-------------|------------|-------|-------|-------------|----|------------|--------|
| Uqcrb       | 3.48748E-67 | 1.04116041 | 0.782 | 0.737 | 1.08297E-62 | WT | Uqcrb      | 0.045  |
| Mt1         | 2.47649E-62 | 0.83974752 | 0.886 | 0.76  | 7.69024E-58 | WT | Mt1        | 0.126  |
| Eif5a       | 5.10552E-62 | 1.07432729 | 0.786 | 0.764 | 1.58542E-57 | WT | Eif5a      | 0.022  |
| Hint1       | 1.47458E-57 | 0.89736698 | 0.812 | 0.784 | 4.57901E-53 | WT | Hint1      | 0.028  |
| Pkm         | 1.69946E-55 | 0.72056803 | 0.934 | 0.846 | 5.27733E-51 | WT | Pkm        | 0.088  |
| S100a9      | 3.00439E-54 | 5.25890546 | 0.261 | 0.001 | 9.32953E-50 | WT | S100a9     | 0.26   |
| Naca        | 4.05215E-54 | 0.71072085 | 0.866 | 0.841 | 1.25831E-49 | WT | Naca       | 0.025  |
| Eif4ebp1    | 1.50038E-52 | 1.65649281 | 0.612 | 0.418 | 4.65913E-48 | WT | Eif4ebp1   | 0.194  |
| Ssr4        | 2.87878E-52 | 1.11662455 | 0.718 | 0.656 | 8.93947E-48 | WT | Ssr4       | 0.062  |
| Prdx2       | 7.87633E-47 | 1.37553829 | 0.665 | 0.593 | 2.44584E-42 | WT | Prdx2      | 0.072  |
| Ctla2a      | 1.06328E-45 | 3.5846832  | 0.287 | 0.044 | 3.3018E-41  | WT | Ctla2a     | 0.243  |
| Aprt        | 4.80507E-45 | 0.86347841 | 0.781 | 0.724 | 1.49212E-40 | WT | Aprt       | 0.057  |
| Tagln2      | 4.4164E-44  | 0.94376053 | 0.757 | 0.726 | 1.37142E-39 | WT | Tagln2     | 0.031  |
| Pgam1       | 3.382E-42   | 0.80107143 | 0.823 | 0.716 | 1.05021E-37 | WT | Pgam1      | 0.107  |
| Stmn1       | 1.56996E-40 | 1.97619437 | 0.408 | 0.179 | 4.87521E-36 | WT | Stmn1      | 0.229  |
| Ifitm2      | 2.74577E-40 | 0.95936155 | 0.817 | 0.781 | 8.52642E-36 | WT | Ifitm2     | 0.036  |
| Park7       | 6.12349E-40 | 1.26911023 | 0.612 | 0.519 | 1.90153E-35 | WT | Park7      | 0.093  |
| O610012G03F | 8.97071E-38 | 1.3384693  | 0.605 | 0.515 | 2.78568E-33 | WT | O610012G03 | 0.09   |
| Ppib        | 3.01439E-37 | 0.84120113 | 0.736 | 0.676 | 9.36057E-33 | WT | Ppib       | 0.06   |
| Sparc       | 4.22641E-36 | 2.44040605 | 0.319 | 0.105 | 1.31243E-31 | WT | Sparc      | 0.214  |
| Cd81        | 2.48064E-35 | 2.0056166  | 0.372 | 0.159 | 7.70313E-31 | WT | Cd81       | 0.213  |
| Alas2       | 1.32423E-34 | 4.01736211 | 0.189 | 0.008 | 4.11213E-30 | WT | Alas2      | 0.181  |
| Psemb3      | 1.47623E-34 | 1.02739198 | 0.662 | 0.629 | 4.58414E-30 | WT | Psemb3     | 0.033  |
| Scand1      | 1.50082E-34 | 0.77017563 | 0.767 | 0.754 | 4.66048E-30 | WT | Scand1     | 0.013  |
| S100a8      | 3.02361E-34 | 5.06047426 | 0.308 | 0.112 | 9.38921E-30 | WT | S100a8     | 0.196  |
| Wfdc17      | 3.37907E-34 | 0.85608494 | 0.87  | 0.844 | 1.0493E-29  | WT | Wfdc17     | 0.026  |
| Bax         | 2.0488E-33  | 1.07889621 | 0.648 | 0.586 | 6.36215E-29 | WT | Bax        | 0.062  |
| Edf1        | 2.20099E-33 | 1.01116761 | 0.666 | 0.619 | 6.83472E-29 | WT | Edf1       | 0.047  |
| Fkbp5       | 8.58372E-33 | 2.45575398 | 0.285 | 0.088 | 2.6655E-28  | WT | Fkbp5      | 0.197  |
| Snrpd2      | 9.27161E-33 | 1.07317826 | 0.637 | 0.597 | 2.87911E-28 | WT | Snrpd2     | 0.04   |
| Dab2        | 3.64633E-32 | 0.94335974 | 0.681 | 0.606 | 1.13229E-27 | WT | Dab2       | 0.075  |
| H2afj       | 5.11393E-31 | 0.82165142 | 0.751 | 0.73  | 1.58803E-26 | WT | H2afj      | 0.021  |
| D8Ertd738e  | 8.3156E-30  | 0.87080892 | 0.695 | 0.66  | 2.58224E-25 | WT | D8Ertd738e | 0.035  |
| Tubb5       | 1.11385E-29 | 0.86018635 | 0.746 | 0.752 | 3.45885E-25 | WT | Tubb5      | -0.006 |
| Atp5d       | 2.52213E-28 | 0.87231628 | 0.682 | 0.673 | 7.83196E-24 | WT | Atp5d      | 0.009  |
| Psemb2      | 6.74239E-28 | 1.01354321 | 0.602 | 0.579 | 2.09371E-23 | WT | Psemb2     | 0.023  |
| Hmgn1       | 9.81837E-28 | 1.55813435 | 0.439 | 0.292 | 3.0489E-23  | WT | Hmgn1      | 0.147  |
| Rnh1        | 1.81787E-27 | 0.84649774 | 0.694 | 0.619 | 5.64505E-23 | WT | Rnh1       | 0.075  |
| Cope        | 3.17133E-27 | 1.22581332 | 0.561 | 0.494 | 9.84793E-23 | WT | Cope       | 0.067  |
| Ppp1r14b    | 5.1295E-27  | 1.20073063 | 0.581 | 0.546 | 1.59286E-22 | WT | Ppp1r14b   | 0.035  |
| Dynll1      | 5.67086E-27 | 0.86342373 | 0.699 | 0.68  | 1.76097E-22 | WT | Dynll1     | 0.019  |
| Ap2s1       | 7.1572E-27  | 0.78645613 | 0.682 | 0.673 | 2.22253E-22 | WT | Ap2s1      | 0.009  |
| Hgsnat      | 1.38521E-26 | 2.20998221 | 0.348 | 0.187 | 4.30148E-22 | WT | Hgsnat     | 0.161  |
| Ran         | 1.46112E-26 | 0.93458183 | 0.65  | 0.646 | 4.53722E-22 | WT | Ran        | 0.004  |
| Pgls        | 9.53241E-26 | 0.9433928  | 0.629 | 0.619 | 2.9601E-21  | WT | Pgls       | 0.01   |
| Ranbp1      | 2.51434E-25 | 1.39984624 | 0.535 | 0.493 | 7.80779E-21 | WT | Ranbp1     | 0.042  |
| Igfbp7      | 5.46851E-25 | 2.74052688 | 0.192 | 0.04  | 1.69814E-20 | WT | Igfbp7     | 0.152  |
| Srsf3       | 1.00285E-24 | 0.8234379  | 0.674 | 0.676 | 3.11415E-20 | WT | Srsf3      | -0.002 |
| Fabp4       | 1.04739E-24 | 0.76303408 | 0.479 | 0.272 | 3.25246E-20 | WT | Fabp4      | 0.207  |
| H2afz       | 1.82978E-24 | 0.72930558 | 0.819 | 0.841 | 5.68202E-20 | WT | H2afz      | -0.022 |
| Pycard      | 1.88651E-24 | 0.84867616 | 0.708 | 0.724 | 5.85816E-20 | WT | Pycard     | -0.016 |
| Ndufa11     | 6.16991E-24 | 0.94128188 | 0.606 | 0.567 | 1.91594E-19 | WT | Ndufa11    | 0.039  |
| Clec4a2     | 2.31245E-23 | 1.08367878 | 0.57  | 0.505 | 7.18086E-19 | WT | Clec4a2    | 0.065  |
| Ms4a6d      | 3.94702E-23 | 0.97238211 | 0.633 | 0.59  | 1.22567E-18 | WT | Ms4a6d     | 0.043  |

|             |             |            |       |       |             |    |            |        |
|-------------|-------------|------------|-------|-------|-------------|----|------------|--------|
| Birc5       | 6.81743E-23 | 2.37912337 | 0.25  | 0.096 | 2.11702E-18 | WT | Birc5      | 0.154  |
| Selenoh     | 7.44003E-23 | 1.72007623 | 0.419 | 0.307 | 2.31035E-18 | WT | Selenoh    | 0.112  |
| Sumo2       | 7.7797E-23  | 0.92611177 | 0.63  | 0.653 | 2.41583E-18 | WT | Sumo2      | -0.023 |
| Stab1       | 1.55211E-22 | 1.29200648 | 0.507 | 0.389 | 4.81978E-18 | WT | Stab1      | 0.118  |
| Eef1d       | 2.09962E-22 | 0.95381013 | 0.595 | 0.589 | 6.51995E-18 | WT | Eef1d      | 0.006  |
| Bpgm        | 6.79599E-21 | 3.63285034 | 0.161 | 0.033 | 2.11036E-16 | WT | Bpgm       | 0.128  |
| Krtcap2     | 3.95292E-20 | 1.24104779 | 0.529 | 0.486 | 1.2275E-15  | WT | Krtcap2    | 0.043  |
| Timm13      | 1.8169E-19  | 0.8202177  | 0.635 | 0.641 | 5.64203E-15 | WT | Timm13     | -0.006 |
| Nt5dc2      | 1.85895E-19 | 2.17678269 | 0.241 | 0.105 | 5.7726E-15  | WT | Nt5dc2     | 0.136  |
| Ptgds       | 2.81557E-19 | 2.37882309 | 0.221 | 0.087 | 8.74318E-15 | WT | Ptgds      | 0.134  |
| Rbfa        | 4.6865E-19  | 1.79855714 | 0.329 | 0.206 | 1.4553E-14  | WT | Rbfa       | 0.123  |
| Card19      | 1.29476E-18 | 1.01302723 | 0.615 | 0.575 | 4.02062E-14 | WT | Card19     | 0.04   |
| Pclaf       | 3.26676E-18 | 1.3296038  | 0.22  | 0.088 | 1.01443E-13 | WT | Pclaf      | 0.132  |
| Tk1         | 3.35733E-18 | 2.4973527  | 0.157 | 0.039 | 1.04255E-13 | WT | Tk1        | 0.118  |
| Ddit4       | 3.9256E-18  | 2.36007888 | 0.153 | 0.036 | 1.21902E-13 | WT | Ddit4      | 0.117  |
| Dad1        | 8.54142E-18 | 0.75332477 | 0.626 | 0.646 | 2.65237E-13 | WT | Dad1       | -0.02  |
| Higd1a      | 2.48451E-17 | 0.92577689 | 0.616 | 0.585 | 7.71514E-13 | WT | Higd1a     | 0.031  |
| Cdca3       | 3.03429E-17 | 2.05135082 | 0.192 | 0.069 | 9.42238E-13 | WT | Cdca3      | 0.123  |
| Acta2       | 3.51585E-17 | 4.25450326 | 0.116 | 0.016 | 1.09178E-12 | WT | Acta2      | 0.1    |
| Ube2c       | 4.68961E-17 | 2.03347724 | 0.213 | 0.088 | 1.45626E-12 | WT | Ube2c      | 0.125  |
| Cks1b       | 4.90061E-17 | 1.82424459 | 0.231 | 0.107 | 1.52179E-12 | WT | Cks1b      | 0.124  |
| Snrpd1      | 1.11033E-16 | 1.08567089 | 0.522 | 0.513 | 3.4479E-12  | WT | Snrpd1     | 0.009  |
| Retnlg      | 1.47666E-16 | 6.63458058 | 0.088 | 0.001 | 4.58548E-12 | WT | Retnlg     | 0.087  |
| Ndufa12     | 1.95426E-16 | 0.96331229 | 0.537 | 0.518 | 6.06856E-12 | WT | Ndufa12    | 0.019  |
| Tyms        | 3.13409E-16 | 2.38406463 | 0.151 | 0.043 | 9.7323E-12  | WT | Tyms       | 0.108  |
| Hist1h1d    | 3.26964E-16 | 3.26768572 | 0.152 | 0.044 | 1.01532E-11 | WT | Hist1h1d   | 0.108  |
| Hist1h2bj   | 3.71909E-16 | 3.93370638 | 0.109 | 0.015 | 1.15489E-11 | WT | Hist1h2bj  | 0.094  |
| Tmem167     | 4.37574E-16 | 0.97559738 | 0.543 | 0.535 | 1.3588E-11  | WT | Tmem167    | 0.008  |
| Nhp2        | 6.47094E-16 | 1.19347444 | 0.455 | 0.405 | 2.00942E-11 | WT | Nhp2       | 0.05   |
| Mrpl12      | 8.67176E-16 | 1.37658365 | 0.402 | 0.331 | 2.69284E-11 | WT | Mrpl12     | 0.071  |
| Mrpl30      | 1.64924E-15 | 0.9995818  | 0.517 | 0.494 | 5.12138E-11 | WT | Mrpl30     | 0.023  |
| Gfer        | 1.89321E-15 | 2.21438006 | 0.199 | 0.088 | 5.879E-11   | WT | Gfer       | 0.111  |
| Ndufb10     | 3.28834E-15 | 0.88238711 | 0.568 | 0.562 | 1.02113E-10 | WT | Ndufb10    | 0.006  |
| Sh2d1b1     | 3.48028E-15 | 3.41270552 | 0.104 | 0.015 | 1.08073E-10 | WT | Sh2d1b1    | 0.089  |
| Mrps24      | 4.18E-15    | 0.94663787 | 0.509 | 0.491 | 1.29802E-10 | WT | Mrps24     | 0.018  |
| Tubb4b      | 5.43174E-15 | 1.56409164 | 0.37  | 0.284 | 1.68672E-10 | WT | Tubb4b     | 0.086  |
| Tmed9       | 7.52345E-15 | 1.00212499 | 0.512 | 0.501 | 2.33626E-10 | WT | Tmed9      | 0.011  |
| Snca        | 1.06449E-14 | 2.94903972 | 0.126 | 0.031 | 3.30557E-10 | WT | Snca       | 0.095  |
| Prelid1     | 1.33562E-14 | 0.76237367 | 0.62  | 0.642 | 4.14749E-10 | WT | Prelid1    | -0.022 |
| Gpihbp1     | 1.93736E-14 | 4.81206781 | 0.076 | 0.001 | 6.01607E-10 | WT | Gpihbp1    | 0.075  |
| Cdk1        | 6.6602E-14  | 2.23575191 | 0.191 | 0.087 | 2.06819E-09 | WT | Cdk1       | 0.104  |
| Manf        | 7.89519E-14 | 1.03131818 | 0.527 | 0.513 | 2.45169E-09 | WT | Manf       | 0.014  |
| Spc24       | 1.08865E-13 | 1.93695029 | 0.15  | 0.052 | 3.3806E-09  | WT | Spc24      | 0.098  |
| Dctpp1      | 1.5868E-13  | 1.5022418  | 0.307 | 0.215 | 4.92748E-09 | WT | Dctpp1     | 0.092  |
| Prune2      | 3.9502E-13  | 2.40938863 | 0.136 | 0.044 | 1.22666E-08 | WT | Prune2     | 0.092  |
| Ccnb2       | 5.17577E-13 | 2.14279576 | 0.141 | 0.048 | 1.60723E-08 | WT | Ccnb2      | 0.093  |
| Ndufv2      | 5.75689E-13 | 1.07252758 | 0.473 | 0.459 | 1.78769E-08 | WT | Ndufv2     | 0.014  |
| Hist1h1b    | 7.91487E-13 | 3.66263001 | 0.093 | 0.016 | 2.4578E-08  | WT | Hist1h1b   | 0.077  |
| 8430408G22F | 8.57048E-13 | 4.62556513 | 0.065 | 0     | 2.66139E-08 | WT | 8430408G22 | 0.065  |
| Slc4a1      | 8.57048E-13 | 5.21657704 | 0.065 | 0     | 2.66139E-08 | WT | Slc4a1     | 0.065  |
| 2410015M20I | 9.31061E-13 | 0.88209326 | 0.527 | 0.523 | 2.89123E-08 | WT | 2410015M20 | 0.004  |
| Hras        | 9.38331E-13 | 1.36247025 | 0.339 | 0.259 | 2.9138E-08  | WT | Hras       | 0.08   |
| Ssr2        | 9.95244E-13 | 1.35148061 | 0.411 | 0.367 | 3.09053E-08 | WT | Ssr2       | 0.044  |
| Ube2m       | 9.96112E-13 | 1.0710288  | 0.473 | 0.465 | 3.09323E-08 | WT | Ube2m      | 0.008  |

|              |             |            |       |       |             |    |             |        |
|--------------|-------------|------------|-------|-------|-------------|----|-------------|--------|
| Polr2j       | 1.24778E-12 | 1.59735066 | 0.349 | 0.284 | 3.87474E-08 | WT | Polr2j      | 0.065  |
| Ms4a6b       | 2.09121E-12 | 1.01982224 | 0.475 | 0.425 | 6.49384E-08 | WT | Ms4a6b      | 0.05   |
| Cdkn3        | 3.03072E-12 | 2.70529204 | 0.109 | 0.028 | 9.41129E-08 | WT | Cdkn3       | 0.081  |
| Igfbp3       | 3.82416E-12 | 2.88847688 | 0.088 | 0.015 | 1.18752E-07 | WT | Igfbp3      | 0.073  |
| Ccnb1        | 5.62487E-12 | 2.19417145 | 0.117 | 0.035 | 1.74669E-07 | WT | Ccnb1       | 0.082  |
| Lcn2         | 6.0824E-12  | 4.98106827 | 0.07  | 0.005 | 1.88877E-07 | WT | Lcn2        | 0.065  |
| Aes          | 6.21332E-12 | 0.78454355 | 0.549 | 0.566 | 1.92942E-07 | WT | Aes         | -0.017 |
| Gypa         | 6.57007E-12 | 4.9436338  | 0.06  | 0     | 2.0402E-07  | WT | Gypa        | 0.06   |
| Tmem37       | 6.60952E-12 | 1.97929247 | 0.223 | 0.131 | 2.05245E-07 | WT | Tmem37      | 0.092  |
| Hist1h1e     | 7.13059E-12 | 2.15554842 | 0.227 | 0.132 | 2.21426E-07 | WT | Hist1h1e    | 0.095  |
| Ccna2        | 7.54252E-12 | 1.84523833 | 0.127 | 0.043 | 2.34218E-07 | WT | Ccna2       | 0.084  |
| Cdca8        | 1.02497E-11 | 1.83626946 | 0.152 | 0.063 | 3.18284E-07 | WT | Cdca8       | 0.089  |
| Mki67        | 1.08099E-11 | 1.5012786  | 0.199 | 0.101 | 3.3568E-07  | WT | Mki67       | 0.098  |
| Bgn          | 1.49542E-11 | 2.42171866 | 0.105 | 0.028 | 4.64373E-07 | WT | Bgn         | 0.077  |
| Cirbp        | 1.54509E-11 | 1.36341922 | 0.332 | 0.251 | 4.79797E-07 | WT | Cirbp       | 0.081  |
| Bex3         | 2.19622E-11 | 1.65152114 | 0.229 | 0.138 | 6.81994E-07 | WT | Bex3        | 0.091  |
| Gm47283      | 2.31068E-11 | 1.39185743 | 0.322 | 0.236 | 7.17536E-07 | WT | Gm47283     | 0.086  |
| Col4a1       | 2.66901E-11 | 1.84254136 | 0.108 | 0.031 | 8.28808E-07 | WT | Col4a1      | 0.077  |
| Hist1h2br    | 5.78055E-11 | 3.77771438 | 0.077 | 0.012 | 1.79504E-06 | WT | Hist1h2br   | 0.065  |
| Arpp19       | 8.38702E-11 | 0.81284413 | 0.556 | 0.578 | 2.60442E-06 | WT | Arpp19      | -0.022 |
| Rtraf        | 1.01225E-10 | 0.73042149 | 0.562 | 0.598 | 3.14334E-06 | WT | Rtraf       | -0.036 |
| Mrpl20       | 1.10921E-10 | 0.81239246 | 0.512 | 0.529 | 3.44444E-06 | WT | Mrpl20      | -0.017 |
| Gm32051      | 1.7514E-10  | 4.06856227 | 0.052 | 0     | 5.43862E-06 | WT | Gm32051     | 0.052  |
| Polr2f       | 2.06011E-10 | 1.11282671 | 0.444 | 0.425 | 6.39725E-06 | WT | Polr2f      | 0.019  |
| Cenpx        | 2.64445E-10 | 0.94913431 | 0.461 | 0.454 | 8.2118E-06  | WT | Cenpx       | 0.007  |
| Prdx4        | 2.70166E-10 | 1.15931074 | 0.379 | 0.334 | 8.38948E-06 | WT | Prdx4       | 0.045  |
| Dok3         | 3.11891E-10 | 1.58277505 | 0.231 | 0.148 | 9.68516E-06 | WT | Dok3        | 0.083  |
| Ankrd37      | 3.806E-10   | 1.98954182 | 0.141 | 0.061 | 1.18188E-05 | WT | Ankrd37     | 0.08   |
| Slc13a3      | 3.84788E-10 | 2.5985867  | 0.099 | 0.029 | 1.19488E-05 | WT | Slc13a3     | 0.07   |
| U2af1        | 3.85954E-10 | 1.0145282  | 0.443 | 0.426 | 1.1985E-05  | WT | U2af1       | 0.017  |
| Ifi213       | 4.81595E-10 | 4.12224771 | 0.052 | 0.001 | 1.4955E-05  | WT | Ifi213      | 0.051  |
| Adm          | 8.59865E-10 | 2.27823958 | 0.091 | 0.025 | 2.67014E-05 | WT | Adm         | 0.066  |
| Taf10        | 9.48579E-10 | 0.70407247 | 0.563 | 0.581 | 2.94562E-05 | WT | Taf10       | -0.018 |
| Emcn         | 1.6452E-09  | 4.24386651 | 0.049 | 0.001 | 5.10885E-05 | WT | Emcn        | 0.048  |
| Ndufs8       | 1.7181E-09  | 0.94821427 | 0.441 | 0.418 | 5.33522E-05 | WT | Ndufs8      | 0.023  |
| Gadd45gip1   | 2.09291E-09 | 1.76596682 | 0.24  | 0.168 | 6.49911E-05 | WT | Gadd45gip1  | 0.072  |
| F11r         | 2.45117E-09 | 3.30858752 | 0.061 | 0.008 | 7.61161E-05 | WT | F11r        | 0.053  |
| Cdc20        | 4.06819E-09 | 2.55169227 | 0.085 | 0.024 | 0.000126329 | WT | Cdc20       | 0.061  |
| Gmnn         | 4.46946E-09 | 1.52649508 | 0.214 | 0.136 | 0.00013879  | WT | Gmnn        | 0.078  |
| Dtymk        | 5.63768E-09 | 1.27826087 | 0.297 | 0.235 | 0.000175067 | WT | Dtymk       | 0.062  |
| Slc25a4      | 6.21966E-09 | 0.77166694 | 0.472 | 0.461 | 0.000193139 | WT | Slc25a4     | 0.011  |
| Pdcd5        | 6.64409E-09 | 0.70605628 | 0.539 | 0.562 | 0.000206319 | WT | Pdcd5       | -0.023 |
| 1810058I24Ri | 7.04325E-09 | 0.73178753 | 0.561 | 0.57  | 0.000218714 | WT | 1810058I24F | -0.009 |
| Tpm2         | 8.50277E-09 | 3.63812886 | 0.048 | 0.003 | 0.000264036 | WT | Tpm2        | 0.045  |
| Hist1h2bb    | 8.92173E-09 | 3.19692829 | 0.051 | 0.004 | 0.000277046 | WT | Hist1h2bb   | 0.047  |
| Hist1h2bm    | 9.45682E-09 | 3.58347188 | 0.05  | 0.004 | 0.000293663 | WT | Hist1h2bm   | 0.046  |
| Lsm2         | 1.20027E-08 | 1.52900576 | 0.226 | 0.155 | 0.00037272  | WT | Lsm2        | 0.071  |
| Nsd2         | 1.86114E-08 | 1.6535212  | 0.239 | 0.17  | 0.00057794  | WT | Nsd2        | 0.069  |
| Incenp       | 1.9699E-08  | 1.78329799 | 0.147 | 0.076 | 0.000611714 | WT | Incenp      | 0.071  |
| Uqcrc1       | 2.06049E-08 | 0.96125307 | 0.444 | 0.442 | 0.000639845 | WT | Uqcrc1      | 0.002  |
| Shcbp1       | 2.39172E-08 | 2.19852792 | 0.064 | 0.013 | 0.0007427   | WT | Shcbp1      | 0.051  |
| S100a11      | 3.37034E-08 | 0.83993663 | 0.664 | 0.669 | 0.001046593 | WT | S100a11     | -0.005 |
| Tpx2         | 3.8355E-08  | 1.67513847 | 0.114 | 0.049 | 0.001191036 | WT | Tpx2        | 0.065  |
| Pold4        | 4.17207E-08 | 1.15565214 | 0.399 | 0.383 | 0.001295554 | WT | Pold4       | 0.016  |

|          |             |            |       |       |             |    |          |        |
|----------|-------------|------------|-------|-------|-------------|----|----------|--------|
| Med21    | 4.68557E-08 | 1.43194137 | 0.307 | 0.256 | 0.001455011 | WT | Med21    | 0.051  |
| Tmem119  | 4.86792E-08 | 3.12668327 | 0.064 | 0.015 | 0.001511635 | WT | Tmem119  | 0.049  |
| Id1      | 5.62171E-08 | 3.53462191 | 0.053 | 0.008 | 0.001745709 | WT | Id1      | 0.045  |
| Nusap1   | 7.06513E-08 | 1.80596844 | 0.09  | 0.032 | 0.002193935 | WT | Nusap1   | 0.058  |
| Eccscr   | 7.57395E-08 | 2.75594246 | 0.048 | 0.005 | 0.00235194  | WT | Eccscr   | 0.043  |
| Fam96a   | 8.28462E-08 | 0.78209834 | 0.48  | 0.491 | 0.002572623 | WT | Fam96a   | -0.011 |
| Ube2s    | 8.94101E-08 | 0.88571853 | 0.494 | 0.526 | 0.002776451 | WT | Ube2s    | -0.032 |
| Aurkb    | 1.12427E-07 | 1.54314804 | 0.09  | 0.033 | 0.003491188 | WT | Aurkb    | 0.057  |
| Cenpf    | 1.13355E-07 | 1.92252363 | 0.09  | 0.033 | 0.003520026 | WT | Cenpf    | 0.057  |
| Tagln    | 1.35904E-07 | 3.38627959 | 0.044 | 0.004 | 0.004220219 | WT | Tagln    | 0.04   |
| Tomm40   | 1.46512E-07 | 1.24304568 | 0.259 | 0.195 | 0.004549624 | WT | Tomm40   | 0.064  |
| Mrpl54   | 1.5704E-07  | 0.8531329  | 0.486 | 0.51  | 0.004876554 | WT | Mrpl54   | -0.024 |
| Hist1h3a | 1.66376E-07 | 3.23480012 | 0.063 | 0.016 | 0.005166488 | WT | Hist1h3a | 0.047  |
| Rnf7     | 1.76101E-07 | 0.87950835 | 0.479 | 0.506 | 0.005468453 | WT | Rnf7     | -0.027 |
| Cenpk    | 1.93647E-07 | 2.76807596 | 0.055 | 0.011 | 0.006013332 | WT | Cenpk    | 0.044  |
| Camta1   | 2.09457E-07 | 1.64399415 | 0.19  | 0.126 | 0.006504278 | WT | Camta1   | 0.064  |
| Aurkaip1 | 2.21735E-07 | 0.8536223  | 0.487 | 0.506 | 0.006885533 | WT | Aurkaip1 | -0.019 |
| Gdpd5    | 2.32547E-07 | 2.31660389 | 0.087 | 0.033 | 0.007221271 | WT | Gdpd5    | 0.054  |
| Scoc     | 2.47335E-07 | 1.54183219 | 0.186 | 0.121 | 0.007680502 | WT | Scoc     | 0.065  |
| Ifi206   | 2.73131E-07 | 3.35780851 | 0.04  | 0.003 | 0.008481525 | WT | Ifi206   | 0.037  |
| Ncapd2   | 3.12197E-07 | 1.6250765  | 0.105 | 0.047 | 0.009694646 | WT | Ncapd2   | 0.058  |
| Cenpm    | 3.2644E-07  | 1.86649647 | 0.07  | 0.021 | 0.010136952 | WT | Cenpm    | 0.049  |
| Apol11b  | 3.46962E-07 | 3.88062915 | 0.034 | 0     | 0.010774214 | WT | Apol11b  | 0.034  |
| Apold1   | 3.52417E-07 | 3.32051079 | 0.053 | 0.011 | 0.010943595 | WT | Apold1   | 0.042  |
| G0s2     | 3.75395E-07 | 1.32644025 | 0.036 | 0.001 | 0.011657139 | WT | G0s2     | 0.035  |
| Tm4sf1   | 3.96519E-07 | 2.07600772 | 0.075 | 0.025 | 0.01231312  | WT | Tm4sf1   | 0.05   |
| Mrps34   | 4.65307E-07 | 1.55207871 | 0.245 | 0.191 | 0.014449174 | WT | Mrps34   | 0.054  |
| Smc2     | 4.77221E-07 | 1.34742594 | 0.164 | 0.099 | 0.014819147 | WT | Smc2     | 0.065  |
| Wfdc21   | 4.90464E-07 | 3.99412473 | 0.038 | 0.003 | 0.015230364 | WT | Wfdc21   | 0.035  |
| Srm      | 5.16882E-07 | 1.42037473 | 0.167 | 0.104 | 0.01605074  | WT | Srm      | 0.063  |
| Atp13a2  | 5.35202E-07 | 0.90598274 | 0.491 | 0.499 | 0.016619641 | WT | Atp13a2  | -0.008 |
| Bola3    | 5.40426E-07 | 1.09392774 | 0.338 | 0.302 | 0.016781841 | WT | Bola3    | 0.036  |
| Plvap    | 5.61004E-07 | 3.47120872 | 0.038 | 0.003 | 0.01742085  | WT | Plvap    | 0.035  |
| Gins2    | 7.65566E-07 | 2.01134374 | 0.11  | 0.055 | 0.023773127 | WT | Gins2    | 0.055  |
| Pfdn6    | 8.07066E-07 | 1.16973731 | 0.349 | 0.324 | 0.025061819 | WT | Pfdn6    | 0.025  |
| Egfl7    | 8.62262E-07 | 3.16358806 | 0.051 | 0.011 | 0.026775811 | WT | Egfl7    | 0.04   |
| Esam     | 9.30822E-07 | 3.67446986 | 0.031 | 0     | 0.028904818 | WT | Esam     | 0.031  |
| Rad51    | 9.76493E-07 | 2.09789604 | 0.059 | 0.016 | 0.030323041 | WT | Rad51    | 0.043  |
| Dtl      | 1.41665E-06 | 2.24454718 | 0.066 | 0.021 | 0.04399135  | WT | Dtl      | 0.045  |
| Carhsp1  | 1.55047E-06 | 1.57876994 | 0.227 | 0.172 | 0.048146854 | WT | Carhsp1  | 0.055  |
| Fundc2   | 1.70818E-06 | 0.87044808 | 0.415 | 0.414 | 0.053044224 | WT | Fundc2   | 0.001  |
| Myl9     | 1.85476E-06 | 2.29694119 | 0.033 | 0.001 | 0.057596006 | WT | Myl9     | 0.032  |
| Ngp      | 2.4943E-06  | 5.3954447  | 0.029 | 0     | 0.077455364 | WT | Ngp      | 0.029  |
| C1qbp    | 2.72956E-06 | 0.97563821 | 0.38  | 0.37  | 0.084761127 | WT | C1qbp    | 0.01   |
| Vcan     | 2.83149E-06 | 2.03494261 | 0.048 | 0.011 | 0.087926344 | WT | Vcan     | 0.037  |
| Mrps14   | 2.85841E-06 | 0.74075842 | 0.485 | 0.514 | 0.08876219  | WT | Mrps14   | -0.029 |
| Car2     | 3.0453E-06  | 2.78843543 | 0.041 | 0.007 | 0.094565613 | WT | Car2     | 0.034  |
| Snx2     | 3.0635E-06  | 0.72642351 | 0.497 | 0.533 | 0.095130942 | WT | Snx2     | -0.036 |
| Sparcl1  | 3.54866E-06 | 3.00363058 | 0.049 | 0.012 | 0.110196575 | WT | Sparcl1  | 0.037  |
| Pbk      | 3.71775E-06 | 1.17735818 | 0.056 | 0.016 | 0.115447152 | WT | Pbk      | 0.04   |
| Phb2     | 3.79502E-06 | 0.75446317 | 0.465 | 0.494 | 0.117846788 | WT | Phb2     | -0.029 |
| Lipg     | 3.98251E-06 | 3.86737778 | 0.033 | 0.003 | 0.123668798 | WT | Lipg     | 0.03   |
| Mrpl17   | 4.07097E-06 | 1.15515505 | 0.344 | 0.331 | 0.126415712 | WT | Mrpl17   | 0.013  |
| Rgs5     | 4.10489E-06 | 3.36695861 | 0.036 | 0.004 | 0.127469096 | WT | Rgs5     | 0.032  |

|           |             |            |       |       |             |    |           |        |
|-----------|-------------|------------|-------|-------|-------------|----|-----------|--------|
| Cited1    | 4.29232E-06 | 2.48690819 | 0.055 | 0.016 | 0.133289331 | WT | Cited1    | 0.039  |
| Yif1b     | 4.36623E-06 | 0.97489586 | 0.336 | 0.31  | 0.135584391 | WT | Yif1b     | 0.026  |
| Pop5      | 4.52425E-06 | 1.14053464 | 0.205 | 0.15  | 0.140491655 | WT | Pop5      | 0.055  |
| Ctgf      | 4.66979E-06 | 3.44759431 | 0.03  | 0.001 | 0.14501092  | WT | Ctgf      | 0.029  |
| Dut       | 4.92794E-06 | 1.3716244  | 0.201 | 0.144 | 0.15302738  | WT | Dut       | 0.057  |
| Mrpl23    | 5.15023E-06 | 0.71069008 | 0.492 | 0.53  | 0.159930056 | WT | Mrpl23    | -0.038 |
| Ech1      | 5.30197E-06 | 1.15436887 | 0.326 | 0.308 | 0.164642229 | WT | Ech1      | 0.018  |
| Ubl4a     | 5.59382E-06 | 1.15996097 | 0.275 | 0.235 | 0.173704942 | WT | Ubl4a     | 0.04   |
| Pin1      | 5.95386E-06 | 1.19512636 | 0.298 | 0.264 | 0.184885307 | WT | Pin1      | 0.034  |
| Aqp1      | 5.97667E-06 | 3.3376282  | 0.03  | 0.001 | 0.185593402 | WT | Aqp1      | 0.029  |
| Col4a2    | 6.1335E-06  | 1.7286009  | 0.061 | 0.02  | 0.190463603 | WT | Col4a2    | 0.041  |
| Esm1      | 6.18353E-06 | 2.42665756 | 0.032 | 0.003 | 0.192017266 | WT | Esm1      | 0.029  |
| Hist2h3b  | 6.53719E-06 | 3.28725211 | 0.037 | 0.005 | 0.202999257 | WT | Hist2h3b  | 0.032  |
| Magoh     | 6.96963E-06 | 1.02930396 | 0.345 | 0.326 | 0.216427918 | WT | Magoh     | 0.019  |
| Eif1ax    | 7.09763E-06 | 0.85593434 | 0.383 | 0.372 | 0.220402794 | WT | Eif1ax    | 0.011  |
| Kif22     | 7.31319E-06 | 2.21170438 | 0.072 | 0.029 | 0.227096552 | WT | Kif22     | 0.043  |
| Psat1     | 8.58274E-06 | 1.69339082 | 0.124 | 0.072 | 0.266519808 | WT | Psat1     | 0.052  |
| Mrps11    | 9.02443E-06 | 1.56840392 | 0.203 | 0.154 | 0.280235526 | WT | Mrps11    | 0.049  |
| Cenpe     | 9.32232E-06 | 1.7223557  | 0.074 | 0.031 | 0.2894859   | WT | Cenpe     | 0.043  |
| Ntpcr     | 9.78087E-06 | 1.37488752 | 0.25  | 0.21  | 0.303725229 | WT | Ntpcr     | 0.04   |
| Mest      | 9.82459E-06 | 3.32371758 | 0.028 | 0.001 | 0.305083134 | WT | Mest      | 0.027  |
| Cst6      | 1.05789E-05 | 2.00006224 | 0.047 | 0.012 | 0.328505513 | WT | Cst6      | 0.035  |
| Tmem252   | 1.23598E-05 | 3.36928873 | 0.025 | 0     | 0.383808273 | WT | Tmem252   | 0.025  |
| Cavin3    | 1.38419E-05 | 3.05092213 | 0.035 | 0.005 | 0.429831654 | WT | Cavin3    | 0.03   |
| Ska3      | 1.41707E-05 | 2.6631021  | 0.027 | 0.001 | 0.440044075 | WT | Ska3      | 0.026  |
| Hp        | 1.59864E-05 | 1.73902685 | 0.088 | 0.043 | 0.49642609  | WT | Hp        | 0.045  |
| Rbbp7     | 1.64608E-05 | 1.20442299 | 0.256 | 0.214 | 0.511157695 | WT | Rbbp7     | 0.042  |
| Cdh5      | 1.76619E-05 | 3.21168057 | 0.032 | 0.004 | 0.548454645 | WT | Cdh5      | 0.028  |
| Pilra     | 1.91847E-05 | 1.36516114 | 0.151 | 0.097 | 0.595742229 | WT | Pilra     | 0.054  |
| Tspo2     | 2.02242E-05 | 3.10568645 | 0.024 | 0     | 0.628023118 | WT | Tspo2     | 0.024  |
| Tacc3     | 2.16487E-05 | 1.23362189 | 0.133 | 0.08  | 0.67225574  | WT | Tacc3     | 0.053  |
| Hmgn2     | 2.21389E-05 | 1.07513807 | 0.349 | 0.338 | 0.687480016 | WT | Hmgn2     | 0.011  |
| Vdac3     | 2.47803E-05 | 0.71418826 | 0.457 | 0.493 | 0.769503145 | WT | Vdac3     | -0.036 |
| Hmga1     | 2.54622E-05 | 2.29540194 | 0.089 | 0.045 | 0.790678405 | WT | Hmga1     | 0.044  |
| Cenpq     | 2.57101E-05 | 0.92822312 | 0.068 | 0.028 | 0.798376375 | WT | Cenpq     | 0.04   |
| Cox4i2    | 2.80098E-05 | 1.28677655 | 0.083 | 0.039 | 0.869787906 | WT | Cox4i2    | 0.044  |
| Tubg1     | 2.81409E-05 | 1.28204544 | 0.111 | 0.064 | 0.873858112 | WT | Tubg1     | 0.047  |
| Dct       | 3.09069E-05 | 1.04864708 | 0.354 | 0.331 | 0.959752663 | WT | Dct       | 0.023  |
| Pfdn1     | 3.70778E-05 | 0.89782979 | 0.405 | 0.426 | 1           | WT | Pfdn1     | -0.021 |
| Cldn5     | 3.80011E-05 | 3.32107425 | 0.025 | 0.001 | 1           | WT | Cldn5     | 0.024  |
| Nr2c2ap   | 3.88057E-05 | 1.4977634  | 0.142 | 0.095 | 1           | WT | Nr2c2ap   | 0.047  |
| Cela1     | 4.0695E-05  | 0.91136044 | 0.164 | 0.112 | 1           | WT | Cela1     | 0.052  |
| Hist1h3e  | 4.08341E-05 | 2.63596083 | 0.049 | 0.016 | 1           | WT | Hist1h3e  | 0.033  |
| Rab33a    | 4.15323E-05 | 2.4512799  | 0.027 | 0.003 | 1           | WT | Rab33a    | 0.024  |
| Sgo2a     | 4.19306E-05 | 1.49594054 | 0.041 | 0.011 | 1           | WT | Sgo2a     | 0.03   |
| Nudc      | 4.29728E-05 | 0.94954596 | 0.357 | 0.351 | 1           | WT | Nudc      | 0.006  |
| Smagp     | 4.32306E-05 | 1.55301108 | 0.115 | 0.068 | 1           | WT | Smagp     | 0.047  |
| Mcm5      | 4.36873E-05 | 1.04006387 | 0.135 | 0.084 | 1           | WT | Mcm5      | 0.051  |
| mt-Nd6    | 4.5041E-05  | 1.65983146 | 0.197 | 0.152 | 1           | WT | mt-Nd6    | 0.045  |
| Gsto1     | 4.91165E-05 | 1.10207578 | 0.266 | 0.23  | 1           | WT | Gsto1     | 0.036  |
| Ncapg     | 5.23481E-05 | 1.43214481 | 0.063 | 0.025 | 1           | WT | Ncapg     | 0.038  |
| S100b     | 6.75613E-05 | 2.70306162 | 0.04  | 0.011 | 1           | WT | S100b     | 0.029  |
| Hist2h2bb | 6.78961E-05 | 2.75569018 | 0.026 | 0.003 | 1           | WT | Hist2h2bb | 0.023  |
| Alg5      | 7.14149E-05 | 1.19432491 | 0.291 | 0.271 | 1           | WT | Alg5      | 0.02   |

|             |             |            |       |       |   |    |             |        |
|-------------|-------------|------------|-------|-------|---|----|-------------|--------|
| Mad2l1      | 7.28836E-05 | 1.14195181 | 0.096 | 0.052 | 1 | WT | Mad2l1      | 0.044  |
| Tyrp1       | 7.35316E-05 | 1.26768839 | 0.212 | 0.167 | 1 | WT | Tyrp1       | 0.045  |
| Tfdp2       | 7.64658E-05 | 2.16263497 | 0.059 | 0.024 | 1 | WT | Tfdp2       | 0.035  |
| Rpa2        | 8.06065E-05 | 1.40262494 | 0.096 | 0.053 | 1 | WT | Rpa2        | 0.043  |
| Cenpu       | 8.20283E-05 | 1.86391864 | 0.047 | 0.016 | 1 | WT | Cenpu       | 0.031  |
| Cdkn2d      | 8.39258E-05 | 1.53633182 | 0.157 | 0.111 | 1 | WT | Cdkn2d      | 0.046  |
| Mrps26      | 8.75146E-05 | 1.04592212 | 0.238 | 0.2   | 1 | WT | Mrps26      | 0.038  |
| Rad51ap1    | 9.12526E-05 | 1.7221151  | 0.047 | 0.016 | 1 | WT | Rad51ap1    | 0.031  |
| Mgp         | 9.30996E-05 | 1.82835847 | 0.035 | 0.008 | 1 | WT | Mgp         | 0.027  |
| Hmgb3       | 9.3369E-05  | 1.70184379 | 0.066 | 0.029 | 1 | WT | Hmgb3       | 0.037  |
| Rnaseh2c    | 9.67916E-05 | 1.00725421 | 0.317 | 0.302 | 1 | WT | Rnaseh2c    | 0.015  |
| Prc1        | 9.88835E-05 | 0.70464333 | 0.082 | 0.041 | 1 | WT | Prc1        | 0.041  |
| Hist2h2aa1  | 0.000104127 | 2.06129346 | 0.099 | 0.057 | 1 | WT | Hist2h2aa1  | 0.042  |
| St3gal5     | 0.000104921 | 0.94944601 | 0.155 | 0.104 | 1 | WT | St3gal5     | 0.051  |
| 1700003F12R | 0.000105816 | 1.60434114 | 0.068 | 0.032 | 1 | WT | 1700003F12I | 0.036  |
| Spta1       | 0.000113565 | 2.44291748 | 0.02  | 0     | 1 | WT | Spta1       | 0.02   |
| Kif18a      | 0.000115343 | 2.21789788 | 0.022 | 0.001 | 1 | WT | Kif18a      | 0.021  |
| Tigd2       | 0.000116057 | 1.42768057 | 0.229 | 0.192 | 1 | WT | Tigd2       | 0.037  |
| Gstm5       | 0.000120882 | 2.16950425 | 0.066 | 0.031 | 1 | WT | Gstm5       | 0.035  |
| Kif20a      | 0.000125287 | 2.10409213 | 0.046 | 0.016 | 1 | WT | Kif20a      | 0.03   |
| Wdhd1       | 0.000126079 | 2.04106297 | 0.073 | 0.036 | 1 | WT | Wdhd1       | 0.037  |
| Psmc4       | 0.000126692 | 0.8536055  | 0.348 | 0.343 | 1 | WT | Psmc4       | 0.005  |
| Plk1        | 0.000127872 | 1.26721043 | 0.061 | 0.027 | 1 | WT | Plk1        | 0.034  |
| Alyref      | 0.000129376 | 0.75013896 | 0.408 | 0.438 | 1 | WT | Alyref      | -0.03  |
| Map3k6      | 0.000130499 | 2.69514908 | 0.022 | 0.001 | 1 | WT | Map3k6      | 0.021  |
| Ppp1r3b     | 0.000140131 | 2.06225785 | 0.096 | 0.056 | 1 | WT | Ppp1r3b     | 0.04   |
| Col15a1     | 0.000149041 | 2.63045788 | 0.044 | 0.015 | 1 | WT | Col15a1     | 0.029  |
| Pdlim7      | 0.000169314 | 1.10211659 | 0.102 | 0.06  | 1 | WT | Pdlim7      | 0.042  |
| Top2a       | 0.000172953 | 1.06270693 | 0.164 | 0.117 | 1 | WT | Top2a       | 0.047  |
| Zfp593      | 0.00017694  | 1.19662159 | 0.219 | 0.182 | 1 | WT | Zfp593      | 0.037  |
| Mcm7        | 0.000179009 | 0.97308855 | 0.142 | 0.096 | 1 | WT | Mcm7        | 0.046  |
| Fignl1      | 0.000186447 | 1.51335192 | 0.043 | 0.015 | 1 | WT | Fignl1      | 0.028  |
| Angptl4     | 0.000188169 | 2.55119439 | 0.037 | 0.011 | 1 | WT | Angptl4     | 0.026  |
| Hist1h2bp   | 0.000221619 | 2.01647511 | 0.021 | 0.001 | 1 | WT | Hist1h2bp   | 0.02   |
| Mybl2       | 0.000225094 | 1.78683343 | 0.039 | 0.012 | 1 | WT | Mybl2       | 0.027  |
| Ptges3      | 0.000225946 | 0.82158878 | 0.4   | 0.422 | 1 | WT | Ptges3      | -0.022 |
| Cyc1        | 0.000227788 | 0.84904272 | 0.404 | 0.431 | 1 | WT | Cyc1        | -0.027 |
| Sptb        | 0.000242169 | 2.38557904 | 0.02  | 0.001 | 1 | WT | Sptb        | 0.019  |
| Ska1        | 0.000261581 | 1.96631248 | 0.04  | 0.013 | 1 | WT | Ska1        | 0.027  |
| Bub1        | 0.000263744 | 1.66669055 | 0.059 | 0.027 | 1 | WT | Bub1        | 0.032  |
| Kif4        | 0.000270025 | 2.19994446 | 0.04  | 0.013 | 1 | WT | Kif4        | 0.027  |
| Cenpw       | 0.00028763  | 1.60223845 | 0.13  | 0.089 | 1 | WT | Cenpw       | 0.041  |
| Tipin       | 0.000288006 | 1.24930042 | 0.139 | 0.097 | 1 | WT | Tipin       | 0.042  |
| Naa10       | 0.000288203 | 1.18910448 | 0.188 | 0.148 | 1 | WT | Naa10       | 0.04   |
| Foxm1       | 0.000295851 | 1.45041634 | 0.054 | 0.023 | 1 | WT | Foxm1       | 0.031  |
| Racgap1     | 0.000296791 | 1.27378626 | 0.145 | 0.103 | 1 | WT | Racgap1     | 0.042  |
| Uhrf1       | 0.000320153 | 1.37646855 | 0.092 | 0.053 | 1 | WT | Uhrf1       | 0.039  |
| Ptprm       | 0.000330373 | 2.56729046 | 0.031 | 0.008 | 1 | WT | Ptprm       | 0.023  |
| Cit         | 0.000332505 | 2.15353798 | 0.042 | 0.015 | 1 | WT | Cit         | 0.027  |
| Nid1        | 0.000344552 | 2.28230763 | 0.025 | 0.004 | 1 | WT | Nid1        | 0.021  |
| Hbq1b       | 0.00034561  | 2.35504274 | 0.017 | 0     | 1 | WT | Hbq1b       | 0.017  |
| Hist1h1a    | 0.000379011 | 2.47887383 | 0.029 | 0.007 | 1 | WT | Hist1h1a    | 0.022  |
| Trim10      | 0.000391219 | 2.57393115 | 0.017 | 0     | 1 | WT | Trim10      | 0.017  |
| Hist1h2bn   | 0.000391219 | 2.35881988 | 0.017 | 0     | 1 | WT | Hist1h2bn   | 0.017  |

|             |             |            |       |       |      |            |        |
|-------------|-------------|------------|-------|-------|------|------------|--------|
| Elof1       | 0.000396343 | 0.89447962 | 0.353 | 0.359 | 1 WT | Elof1      | -0.006 |
| Slamf9      | 0.000408201 | 0.71724138 | 0.297 | 0.258 | 1 WT | Slamf9     | 0.039  |
| Bhlhe41     | 0.000409777 | 1.58241035 | 0.142 | 0.101 | 1 WT | Bhlhe41    | 0.041  |
| Gm26724     | 0.000422313 | 2.55921676 | 0.029 | 0.007 | 1 WT | Gm26724    | 0.022  |
| Rrm1        | 0.000431442 | 0.76754867 | 0.17  | 0.126 | 1 WT | Rrm1       | 0.044  |
| Gm38832     | 0.000449802 | 2.04540666 | 0.019 | 0.001 | 1 WT | Gm38832    | 0.018  |
| Jpt2        | 0.000461002 | 1.23609418 | 0.122 | 0.083 | 1 WT | Jpt2       | 0.039  |
| Gm5483      | 0.000501402 | 4.07577721 | 0.016 | 0     | 1 WT | Gm5483     | 0.016  |
| Dnajc17     | 0.000501571 | 2.06675347 | 0.071 | 0.039 | 1 WT | Dnajc17    | 0.032  |
| Ccdc124     | 0.000505564 | 1.06655094 | 0.333 | 0.34  | 1 WT | Ccdc124    | -0.007 |
| Hjurp       | 0.000520222 | 0.94470829 | 0.13  | 0.088 | 1 WT | Hjurp      | 0.042  |
| Sap30       | 0.000523839 | 1.16487926 | 0.289 | 0.27  | 1 WT | Sap30      | 0.019  |
| Mrps16      | 0.000536677 | 0.97123882 | 0.377 | 0.405 | 1 WT | Mrps16     | -0.028 |
| Cdkn2c      | 0.000559821 | 1.34263201 | 0.098 | 0.061 | 1 WT | Cdkn2c     | 0.037  |
| Cdca5       | 0.000561817 | 2.07606461 | 0.036 | 0.012 | 1 WT | Cdca5      | 0.024  |
| Lsm5        | 0.000564827 | 0.8219343  | 0.374 | 0.387 | 1 WT | Lsm5       | -0.013 |
| Galk1       | 0.000591411 | 0.88645558 | 0.246 | 0.212 | 1 WT | Galk1      | 0.034  |
| Rac3        | 0.000609616 | 2.01141219 | 0.038 | 0.013 | 1 WT | Rac3       | 0.025  |
| Clspn       | 0.00061419  | 1.30150868 | 0.063 | 0.032 | 1 WT | Clspn      | 0.031  |
| Smn1        | 0.000623822 | 1.0378556  | 0.195 | 0.159 | 1 WT | Smn1       | 0.036  |
| Cep55       | 0.0006386   | 1.4680343  | 0.045 | 0.019 | 1 WT | Cep55      | 0.026  |
| Pkmyt1      | 0.000653357 | 0.84820338 | 0.07  | 0.037 | 1 WT | Pkmyt1     | 0.033  |
| Cks2        | 0.000683951 | 0.74172148 | 0.204 | 0.166 | 1 WT | Cks2       | 0.038  |
| Unc119      | 0.000690838 | 1.16536322 | 0.194 | 0.156 | 1 WT | Unc119     | 0.038  |
| Adgrf5      | 0.000695067 | 2.3525727  | 0.02  | 0.003 | 1 WT | Adgrf5     | 0.017  |
| Neil3       | 0.000706775 | 2.00419203 | 0.039 | 0.015 | 1 WT | Neil3      | 0.024  |
| Timm50      | 0.000711673 | 1.28559844 | 0.21  | 0.179 | 1 WT | Timm50     | 0.031  |
| Ssna1       | 0.000718618 | 1.17276892 | 0.245 | 0.223 | 1 WT | Ssna1      | 0.022  |
| Asf1b       | 0.000724048 | 1.06315445 | 0.08  | 0.045 | 1 WT | Asf1b      | 0.035  |
| Hist1h2ae   | 0.00072424  | 1.72824026 | 0.12  | 0.083 | 1 WT | Hist1h2ae  | 0.037  |
| Bfsp2       | 0.000727964 | 2.45346624 | 0.015 | 0     | 1 WT | Bfsp2      | 0.015  |
| Spata24     | 0.000750066 | 0.94536785 | 0.047 | 0.02  | 1 WT | Spata24    | 0.027  |
| Bub1b       | 0.000753137 | 1.61148336 | 0.089 | 0.055 | 1 WT | Bub1b      | 0.034  |
| Cdr2        | 0.000806846 | 1.73173298 | 0.048 | 0.021 | 1 WT | Cdr2       | 0.027  |
| Col6a3      | 0.000810982 | 2.26415344 | 0.048 | 0.021 | 1 WT | Col6a3     | 0.027  |
| Dlgap5      | 0.000818996 | 1.51731177 | 0.05  | 0.023 | 1 WT | Dlgap5     | 0.027  |
| 2610524H06F | 0.000836632 | 1.51641779 | 0.129 | 0.092 | 1 WT | 2610524H06 | 0.037  |
| Skp2        | 0.000875415 | 1.6737937  | 0.059 | 0.029 | 1 WT | Skp2       | 0.03   |
| Cald1       | 0.000889988 | 2.28219567 | 0.044 | 0.019 | 1 WT | Cald1      | 0.025  |
| 2610318N02F | 0.000923397 | 1.89192321 | 0.024 | 0.005 | 1 WT | 2610318N02 | 0.019  |
| Gm807       | 0.000933832 | 2.02853427 | 0.014 | 0     | 1 WT | Gm807      | 0.014  |
| Polr2e      | 0.000955047 | 0.85507641 | 0.291 | 0.272 | 1 WT | Polr2e     | 0.019  |
| Poc1a       | 0.000969239 | 1.6948823  | 0.06  | 0.031 | 1 WT | Poc1a      | 0.029  |
| Rbp7        | 0.000970685 | 2.35149506 | 0.027 | 0.007 | 1 WT | Rbp7       | 0.02   |
| Col18a1     | 0.001020492 | 1.71161454 | 0.037 | 0.013 | 1 WT | Col18a1    | 0.024  |
| Kn1l        | 0.00106204  | 1.76355014 | 0.049 | 0.023 | 1 WT | Kn1l       | 0.026  |
| Rrm2        | 0.001074858 | 0.95061905 | 0.102 | 0.065 | 1 WT | Rrm2       | 0.037  |
| Ifit3       | 0.001107569 | 0.90312235 | 0.057 | 0.092 | 1 WT | Ifit3      | -0.035 |
| Uchl3       | 0.00111089  | 1.43226277 | 0.156 | 0.121 | 1 WT | Uchl3      | 0.035  |
| Gm5914      | 0.001116473 | 2.29407068 | 0.019 | 0.003 | 1 WT | Gm5914     | 0.016  |
| E230001N04F | 0.001168449 | 1.19079484 | 0.022 | 0.004 | 1 WT | E230001N04 | 0.018  |
| Hist3h2ba   | 0.001234487 | 0.99286863 | 0.024 | 0.005 | 1 WT | Hist3h2ba  | 0.019  |
| Nek2        | 0.001238673 | 1.35796817 | 0.036 | 0.013 | 1 WT | Nek2       | 0.023  |
| Cdca2       | 0.001259676 | 1.1197556  | 0.034 | 0.012 | 1 WT | Cdca2      | 0.022  |

|             |             |            |       |       |      |             |        |
|-------------|-------------|------------|-------|-------|------|-------------|--------|
| Prr11       | 0.001287658 | 1.40933913 | 0.038 | 0.015 | 1 WT | Prr11       | 0.023  |
| Snrpa1      | 0.001334493 | 0.92148725 | 0.254 | 0.232 | 1 WT | Snrpa1      | 0.022  |
| Rnf26       | 0.001378807 | 1.49595714 | 0.096 | 0.063 | 1 WT | Rnf26       | 0.033  |
| Hist1h3i    | 0.001408362 | 2.1118165  | 0.021 | 0.004 | 1 WT | Hist1h3i    | 0.017  |
| Nxt1        | 0.001416508 | 1.16195137 | 0.137 | 0.103 | 1 WT | Nxt1        | 0.034  |
| Kif2c       | 0.001430023 | 1.78028298 | 0.045 | 0.02  | 1 WT | Kif2c       | 0.025  |
| Mrpl50      | 0.001487874 | 1.44395476 | 0.146 | 0.113 | 1 WT | Mrpl50      | 0.033  |
| Ska2        | 0.001504318 | 1.71388495 | 0.041 | 0.017 | 1 WT | Ska2        | 0.024  |
| Plp2        | 0.001504566 | 1.10055259 | 0.193 | 0.162 | 1 WT | Plp2        | 0.031  |
| Kif15       | 0.001505987 | 1.08790502 | 0.072 | 0.041 | 1 WT | Kif15       | 0.031  |
| Lsm11       | 0.001519464 | 1.06534545 | 0.058 | 0.031 | 1 WT | Lsm11       | 0.027  |
| Nuf2        | 0.001604885 | 1.65595162 | 0.045 | 0.02  | 1 WT | Nuf2        | 0.025  |
| Gtf2a2      | 0.001608462 | 0.98718625 | 0.302 | 0.3   | 1 WT | Gtf2a2      | 0.002  |
| Nrm         | 0.001702466 | 1.16544707 | 0.12  | 0.085 | 1 WT | Nrm         | 0.035  |
| B930036N10F | 0.001710114 | 1.60725818 | 0.086 | 0.055 | 1 WT | B930036N10C | 0.031  |
| Pa2g4       | 0.00172803  | 0.93264063 | 0.334 | 0.339 | 1 WT | Pa2g4       | -0.005 |
| Actg2       | 0.001744049 | 2.35327605 | 0.013 | 0     | 1 WT | Actg2       | 0.013  |
| Cd248       | 0.001766157 | 2.41000414 | 0.016 | 0.001 | 1 WT | Cd248       | 0.015  |
| Lrr1        | 0.001808865 | 2.02044877 | 0.029 | 0.009 | 1 WT | Lrr1        | 0.02   |
| Bora        | 0.001838669 | 1.03859642 | 0.053 | 0.027 | 1 WT | Bora        | 0.026  |
| Spc25       | 0.001933499 | 1.00745414 | 0.071 | 0.041 | 1 WT | Spc25       | 0.03   |
| Prss23      | 0.001943583 | 2.43606027 | 0.027 | 0.008 | 1 WT | Prss23      | 0.019  |
| Tmem238     | 0.001955258 | 1.61583977 | 0.074 | 0.044 | 1 WT | Tmem238     | 0.03   |
| Pmf1        | 0.001957093 | 0.80042709 | 0.216 | 0.187 | 1 WT | Pmf1        | 0.029  |
| Psmc3ip     | 0.002031292 | 1.09946063 | 0.042 | 0.019 | 1 WT | Psmc3ip     | 0.023  |
| Pgp         | 0.002075518 | 1.1927258  | 0.227 | 0.204 | 1 WT | Pgp         | 0.023  |
| Stfa2l1     | 0.00224129  | 2.72887464 | 0.012 | 0     | 1 WT | Stfa2l1     | 0.012  |
| Adrb1       | 0.002259748 | 2.26257272 | 0.015 | 0.001 | 1 WT | Adrb1       | 0.014  |
| Haus4       | 0.002276648 | 0.87364426 | 0.081 | 0.051 | 1 WT | Haus4       | 0.03   |
| Orc6        | 0.002298791 | 1.6276293  | 0.103 | 0.072 | 1 WT | Orc6        | 0.031  |
| Pex13       | 0.002429305 | 1.33212551 | 0.189 | 0.163 | 1 WT | Pex13       | 0.026  |
| Mrto4       | 0.002432579 | 1.17611176 | 0.216 | 0.195 | 1 WT | Mrto4       | 0.021  |
| Camp        | 0.002541403 | 4.6470883  | 0.012 | 0     | 1 WT | Camp        | 0.012  |
| Asprv1      | 0.002541403 | 2.46543182 | 0.012 | 0     | 1 WT | Asprv1      | 0.012  |
| Gm42031     | 0.002541403 | 2.19755933 | 0.012 | 0     | 1 WT | Gm42031     | 0.012  |
| Cdc25c      | 0.002558853 | 1.26696685 | 0.026 | 0.008 | 1 WT | Cdc25c      | 0.018  |
| Mrps23      | 0.002644948 | 1.02305975 | 0.24  | 0.222 | 1 WT | Mrps23      | 0.018  |
| Zfp958      | 0.002734492 | 1.87111386 | 0.024 | 0.007 | 1 WT | Zfp958      | 0.017  |
| Ramp2       | 0.002742099 | 1.37479579 | 0.02  | 0.004 | 1 WT | Ramp2       | 0.016  |
| Aspm        | 0.00275705  | 1.42991499 | 0.036 | 0.015 | 1 WT | Aspm        | 0.021  |
| Lrg1        | 0.002770459 | 1.97697668 | 0.022 | 0.005 | 1 WT | Lrg1        | 0.017  |
| Melk        | 0.002789698 | 0.72715033 | 0.038 | 0.016 | 1 WT | Melk        | 0.022  |
| Crip2       | 0.002807403 | 2.19812293 | 0.046 | 0.023 | 1 WT | Crip2       | 0.023  |
| Hspb1       | 0.002821032 | 1.67803586 | 0.036 | 0.015 | 1 WT | Hspb1       | 0.021  |
| Cdkn2a      | 0.002882208 | 1.52245421 | 0.012 | 0     | 1 WT | Cdkn2a      | 0.012  |
| Hist1h2bh   | 0.002982538 | 2.00920663 | 0.017 | 0.003 | 1 WT | Hist1h2bh   | 0.014  |
| Oscp1       | 0.00300705  | 1.84886482 | 0.017 | 0.003 | 1 WT | Oscp1       | 0.014  |
| Ctnnbip1    | 0.003021751 | 1.27408493 | 0.169 | 0.142 | 1 WT | Ctnnbip1    | 0.027  |
| Pimreg      | 0.003052877 | 1.22167575 | 0.046 | 0.023 | 1 WT | Pimreg      | 0.023  |
| Col5a3      | 0.003105905 | 2.05441148 | 0.023 | 0.007 | 1 WT | Col5a3      | 0.016  |
| Ect2        | 0.003110579 | 1.70397845 | 0.035 | 0.015 | 1 WT | Ect2        | 0.02   |
| Aurka       | 0.003162005 | 1.31806449 | 0.056 | 0.031 | 1 WT | Aurka       | 0.025  |
| Cpe         | 0.00316637  | 1.70336396 | 0.046 | 0.023 | 1 WT | Cpe         | 0.023  |
| Timm8a1     | 0.003233995 | 0.8885984  | 0.192 | 0.163 | 1 WT | Timm8a1     | 0.029  |

|             |             |            |       |       |      |            |        |
|-------------|-------------|------------|-------|-------|------|------------|--------|
| Hspg2       | 0.003444332 | 0.89157356 | 0.039 | 0.017 | 1 WT | Hspg2      | 0.022  |
| Mcm6        | 0.003459311 | 1.07826072 | 0.164 | 0.132 | 1 WT | Mcm6       | 0.032  |
| Pcdh17      | 0.003709165 | 2.24764778 | 0.011 | 0     | 1 WT | Pcdh17     | 0.011  |
| Rnaset2b    | 0.00373773  | 1.72429753 | 0.033 | 0.013 | 1 WT | Rnaset2b   | 0.02   |
| Adgrl4      | 0.00381337  | 2.52060043 | 0.016 | 0.003 | 1 WT | Adgrl4     | 0.013  |
| Mrpl35      | 0.004010172 | 0.8705741  | 0.29  | 0.286 | 1 WT | Mrpl35     | 0.004  |
| Hist1h2bg   | 0.004025157 | 2.45096855 | 0.027 | 0.009 | 1 WT | Hist1h2bg  | 0.018  |
| Impa2       | 0.004116111 | 1.58606711 | 0.152 | 0.123 | 1 WT | Impa2      | 0.029  |
| Mrnip       | 0.004137148 | 2.10369188 | 0.018 | 0.004 | 1 WT | Mrnip      | 0.014  |
| Ube2o       | 0.00419436  | 1.66661945 | 0.083 | 0.055 | 1 WT | Ube2o      | 0.028  |
| Pomk        | 0.004194762 | 1.83897443 | 0.05  | 0.027 | 1 WT | Pomk       | 0.023  |
| MIana       | 0.004305298 | 1.25564181 | 0.155 | 0.127 | 1 WT | MIana      | 0.028  |
| Cav1        | 0.004309278 | 1.40225335 | 0.033 | 0.013 | 1 WT | Cav1       | 0.02   |
| Ebf1        | 0.004321465 | 2.7038491  | 0.016 | 0.003 | 1 WT | Ebf1       | 0.013  |
| Ptp4a3      | 0.004322496 | 1.39545408 | 0.115 | 0.085 | 1 WT | Ptp4a3     | 0.03   |
| 8030462N17F | 0.004418624 | 0.75190619 | 0.019 | 0.036 | 1 WT | 8030462N17 | -0.017 |
| Cadm1       | 0.00446411  | 0.83321747 | 0.215 | 0.184 | 1 WT | Cadm1      | 0.031  |
| Mcam        | 0.004513495 | 1.55677237 | 0.034 | 0.015 | 1 WT | Mcam       | 0.019  |
| Zkscan14    | 0.004649272 | 1.93636675 | 0.058 | 0.033 | 1 WT | Zkscan14   | 0.025  |
| Kif11       | 0.004752841 | 1.17765506 | 0.057 | 0.032 | 1 WT | Kif11      | 0.025  |
| Myct1       | 0.004777409 | 2.30494297 | 0.011 | 0     | 1 WT | Myct1      | 0.011  |
| Aunip       | 0.004873594 | 1.55586216 | 0.016 | 0.003 | 1 WT | Aunip      | 0.013  |
| Suv39h2     | 0.005128737 | 0.92139637 | 0.022 | 0.007 | 1 WT | Suv39h2    | 0.015  |
| 1110008P14R | 0.005189727 | 1.27280529 | 0.211 | 0.194 | 1 WT | 1110008P14 | 0.017  |
| Clpp        | 0.005338507 | 0.95191586 | 0.161 | 0.134 | 1 WT | Clpp       | 0.027  |
| Map3k8      | 0.005383062 | 0.95460928 | 0.252 | 0.232 | 1 WT | Map3k8     | 0.02   |
| Rfc4        | 0.005405276 | 1.03484893 | 0.094 | 0.065 | 1 WT | Rfc4       | 0.029  |
| Tinagl1     | 0.005518719 | 1.93025556 | 0.03  | 0.012 | 1 WT | Tinagl1    | 0.018  |
| Gys1        | 0.005530237 | 0.71850831 | 0.093 | 0.135 | 1 WT | Gys1       | -0.042 |
| Blm         | 0.005656155 | 1.13706781 | 0.053 | 0.029 | 1 WT | Blm        | 0.024  |
| Ndufa4l2    | 0.005689999 | 1.43148759 | 0.028 | 0.011 | 1 WT | Ndufa4l2   | 0.017  |
| Pgf         | 0.00569839  | 1.47764426 | 0.039 | 0.019 | 1 WT | Pgf        | 0.02   |
| Eid1        | 0.00570914  | 0.71016024 | 0.411 | 0.437 | 1 WT | Eid1       | -0.026 |
| C1d         | 0.005857317 | 0.93337352 | 0.295 | 0.298 | 1 WT | C1d        | -0.003 |
| Chaf1b      | 0.005892942 | 1.63422803 | 0.083 | 0.056 | 1 WT | Chaf1b     | 0.027  |
| Pigyl       | 0.005969476 | 1.16654904 | 0.148 | 0.12  | 1 WT | Pigyl      | 0.028  |
| Commd9      | 0.005976447 | 1.44965402 | 0.15  | 0.124 | 1 WT | Commd9     | 0.026  |
| Fbxo5       | 0.006101522 | 0.76258714 | 0.039 | 0.019 | 1 WT | Fbxo5      | 0.02   |
| Fam220a     | 0.006233371 | 1.36344968 | 0.137 | 0.109 | 1 WT | Fam220a    | 0.028  |
| Igsf9       | 0.00628244  | 2.21509322 | 0.026 | 0.009 | 1 WT | Igsf9      | 0.017  |
| Agpat2      | 0.006413248 | 0.69375826 | 0.064 | 0.097 | 1 WT | Agpat2     | -0.033 |
| Pole        | 0.006636382 | 0.71211679 | 0.027 | 0.011 | 1 WT | Pole       | 0.016  |
| Saa3        | 0.006705653 | 2.49377383 | 0.042 | 0.021 | 1 WT | Saa3       | 0.021  |
| Sdhaf1      | 0.006714838 | 1.07318562 | 0.14  | 0.112 | 1 WT | Sdhaf1     | 0.028  |
| Pald1       | 0.006736972 | 1.60502963 | 0.045 | 0.024 | 1 WT | Pald1      | 0.021  |
| Mylk        | 0.006755397 | 1.78814382 | 0.023 | 0.008 | 1 WT | Mylk       | 0.015  |
| Trem3       | 0.006911522 | 1.9961395  | 0.019 | 0.005 | 1 WT | Trem3      | 0.014  |
| Hist1h4m    | 0.006996156 | 2.36848003 | 0.01  | 0     | 1 WT | Hist1h4m   | 0.01   |
| Emc6        | 0.007045959 | 0.76929778 | 0.352 | 0.379 | 1 WT | Emc6       | -0.027 |
| Arl6ip4     | 0.007060915 | 0.81231705 | 0.245 | 0.232 | 1 WT | Arl6ip4    | 0.013  |
| Serpinh1    | 0.007099692 | 1.45949967 | 0.069 | 0.044 | 1 WT | Serpinh1   | 0.025  |
| Apoo        | 0.007186311 | 1.23896139 | 0.077 | 0.051 | 1 WT | Apoo       | 0.026  |
| Mydgf       | 0.007320734 | 0.75301552 | 0.403 | 0.445 | 1 WT | Mydgf      | -0.042 |
| Dst         | 0.007382503 | 0.75805626 | 0.132 | 0.101 | 1 WT | Dst        | 0.031  |

|          |             |            |       |       |                |          |        |
|----------|-------------|------------|-------|-------|----------------|----------|--------|
| Oip5     | 0.007506816 | 1.91050436 | 0.021 | 0.007 | 1 WT           | Oip5     | 0.014  |
| Mrpl55   | 0.007585154 | 0.95161506 | 0.236 | 0.222 | 1 WT           | Mrpl55   | 0.014  |
| Ifi27    | 0.007720221 | 0.81870775 | 0.328 | 0.334 | 1 WT           | Ifi27    | -0.006 |
| Negr1    | 0.007814544 | 1.87728328 | 0.019 | 0.005 | 1 WT           | Negr1    | 0.014  |
| Rraga    | 0.007897378 | 1.02069922 | 0.278 | 0.278 | 1 WT           | Rraga    | 0      |
| Gipr     | 0.007929561 | 2.91528346 | 0.012 | 0.001 | 1 WT           | Gipr     | 0.011  |
| Sephs2   | 0.008018533 | 1.43273888 | 0.082 | 0.056 | 1 WT           | Sephs2   | 0.026  |
| Chtf18   | 0.008213782 | 1.89284528 | 0.029 | 0.012 | 1 WT           | Chtf18   | 0.017  |
| Iqgap3   | 0.008253591 | 1.1606485  | 0.068 | 0.043 | 1 WT           | Iqgap3   | 0.025  |
| Pfdn2    | 0.008329327 | 0.76859147 | 0.39  | 0.434 | 1 WT           | Pfdn2    | -0.044 |
| Pole3    | 0.008348422 | 0.99691085 | 0.183 | 0.162 | 1 WT           | Pole3    | 0.021  |
| Enkd1    | 0.0083583   | 1.55053359 | 0.036 | 0.017 | 1 WT           | Enkd1    | 0.019  |
| Pkd2     | 0.008378981 | 0.75458076 | 0.029 | 0.049 | 1 WT           | Pkd2     | -0.02  |
| Hist1h3d | 0.008789262 | 1.31997094 | 0.027 | 0.011 | 1 WT           | Hist1h3d | 0.016  |
| Zfp580   | 0.008893471 | 1.5283141  | 0.025 | 0.009 | 1 WT           | Zfp580   | 0.016  |
| Mphosph6 | 0.008932366 | 1.18541738 | 0.145 | 0.119 | 1 WT           | Mphosph6 | 0.026  |
| Smad7    | 0.008973003 | 0.73686619 | 0.087 | 0.124 | 1 WT           | Smad7    | -0.037 |
| Hist1h3g | 0.008992335 | 1.65614423 | 0.012 | 0.001 | 1 WT           | Hist1h3g | 0.011  |
| Akap12   | 0.009029508 | 2.13786255 | 0.012 | 0.001 | 1 WT           | Akap12   | 0.011  |
| Cd300e   | 0.009482208 | 1.12485071 | 0.036 | 0.017 | 1 WT           | Cd300e   | 0.019  |
| Pdpf     | 0.009533696 | 1.02634173 | 0.247 | 0.239 | 1 WT           | Pdpf     | 0.008  |
| Eif1ad   | 0.009573063 | 0.82945621 | 0.268 | 0.264 | 1 WT           | Eif1ad   | 0.004  |
| Cox6b2   | 0.009699228 | 1.87932625 | 0.042 | 0.023 | 1 WT           | Cox6b2   | 0.019  |
| Dbn1     | 0.009802945 | 1.30471364 | 0.016 | 0.004 | 1 WT           | Dbn1     | 0.012  |
| Ifi202b  | 0           | 7.28847635 | 0.591 | 0     | 0 KO           | Ifi202b  | 0.591  |
| Il1b     | 0           | 5.14388449 | 0.678 | 0.077 | 0 KO           | Il1b     | 0.601  |
| Egr2     | 0           | 4.82742898 | 0.65  | 0.031 | 0 KO           | Egr2     | 0.619  |
| Nr4a1    | 0           | 4.40889882 | 0.728 | 0.067 | 0 KO           | Nr4a1    | 0.661  |
| Tnfaip2  | 0           | 4.00960679 | 0.753 | 0.131 | 0 KO           | Tnfaip2  | 0.622  |
| Cd83     | 0           | 3.77375322 | 0.825 | 0.188 | 0 KO           | Cd83     | 0.637  |
| H2-Aa    | 0           | 3.44948449 | 0.949 | 0.41  | 0 KO           | H2-Aa    | 0.539  |
| Fosb     | 3.7088E-299 | 3.38160842 | 0.734 | 0.118 | 1.1517E-294 KO | Fosb     | 0.616  |
| Tnfaip3  | 4.8203E-299 | 3.3776113  | 0.776 | 0.149 | 1.4968E-294 KO | Tnfaip3  | 0.627  |
| Egr1     | 2.6341E-268 | 3.94357421 | 0.64  | 0.093 | 8.1797E-264 KO | Egr1     | 0.547  |
| H2-T23   | 1.016E-265  | 3.03126398 | 0.805 | 0.247 | 3.1549E-261 KO | H2-T23   | 0.558  |
| Csrnp1   | 1.4329E-264 | 3.30133165 | 0.664 | 0.101 | 4.4496E-260 KO | Csrnp1   | 0.563  |
| H2-Eb1   | 1.8883E-262 | 2.91325231 | 0.909 | 0.368 | 5.8636E-258 KO | H2-Eb1   | 0.541  |
| Kdm6b    | 6.5025E-262 | 3.09744494 | 0.724 | 0.139 | 2.0192E-257 KO | Kdm6b    | 0.585  |
| Gm42418  | 5.6531E-259 | 2.03999883 | 0.999 | 0.994 | 1.7555E-254 KO | Gm42418  | 0.005  |
| H2-Ab1   | 7.5967E-259 | 2.95273078 | 0.944 | 0.5   | 2.359E-254 KO  | H2-Ab1   | 0.444  |
| Gpr132   | 2.1607E-243 | 4.2836523  | 0.438 | 0.027 | 6.7096E-239 KO | Gpr132   | 0.411  |
| Irf1     | 4.7432E-237 | 3.183759   | 0.619 | 0.097 | 1.4729E-232 KO | Irf1     | 0.522  |
| H2-K1    | 7.7082E-236 | 1.46472585 | 0.981 | 0.886 | 2.3936E-231 KO | H2-K1    | 0.095  |
| Rel      | 1.2295E-235 | 2.80676953 | 0.649 | 0.111 | 3.8179E-231 KO | Rel      | 0.538  |
| Rnf19b   | 1.9811E-235 | 2.68266186 | 0.758 | 0.193 | 6.152E-231 KO  | Rnf19b   | 0.565  |
| Egr3     | 8.424E-230  | 6.22045779 | 0.314 | 0.003 | 2.6159E-225 KO | Egr3     | 0.311  |
| Nlrp3    | 5.42E-228   | 3.37152173 | 0.517 | 0.059 | 1.6831E-223 KO | Nlrp3    | 0.458  |
| Ets2     | 4.6585E-227 | 2.47671717 | 0.702 | 0.144 | 1.4466E-222 KO | Ets2     | 0.558  |
| Ptgs2    | 7.9608E-227 | 4.25196383 | 0.475 | 0.047 | 2.4721E-222 KO | Ptgs2    | 0.428  |
| Tnip3    | 1.5624E-226 | 3.79917514 | 0.507 | 0.058 | 4.8518E-222 KO | Tnip3    | 0.449  |
| Psap     | 1.0398E-224 | 1.67048984 | 0.993 | 0.94  | 3.2289E-220 KO | Psap     | 0.053  |
| Cd74     | 1.5904E-224 | 2.52396034 | 0.957 | 0.638 | 4.9388E-220 KO | Cd74     | 0.319  |
| Acod1    | 5.6181E-222 | 3.90148291 | 0.446 | 0.038 | 1.7446E-217 KO | Acod1    | 0.408  |
| Junb     | 1.4009E-220 | 2.72453674 | 0.94  | 0.544 | 4.3503E-216 KO | Junb     | 0.396  |

|         |             |            |       |       |                |         |       |
|---------|-------------|------------|-------|-------|----------------|---------|-------|
| Btg2    | 2.5209E-219 | 2.79279595 | 0.752 | 0.19  | 7.828E-215 KO  | Btg2    | 0.562 |
| Trib1   | 1.0121E-218 | 2.61967977 | 0.607 | 0.099 | 3.143E-214 KO  | Trib1   | 0.508 |
| Sgms1   | 3.4007E-218 | 2.76213073 | 0.629 | 0.111 | 1.056E-213 KO  | Sgms1   | 0.518 |
| Stat1   | 5.5951E-215 | 2.75488557 | 0.701 | 0.171 | 1.7374E-210 KO | Stat1   | 0.53  |
| Retnla  | 8.6471E-213 | 11.2618874 | 0.286 | 0.002 | 2.6852E-208 KO | Retnla  | 0.284 |
| Pde4b   | 6.4596E-211 | 2.71214592 | 0.55  | 0.077 | 2.0059E-206 KO | Pde4b   | 0.473 |
| Malt1   | 2.6779E-209 | 3.01677222 | 0.575 | 0.093 | 8.3158E-205 KO | Malt1   | 0.482 |
| Dusp5   | 3.6886E-209 | 3.68734241 | 0.469 | 0.051 | 1.1454E-204 KO | Dusp5   | 0.418 |
| Nfkbia  | 5.2081E-208 | 2.80981567 | 0.885 | 0.451 | 1.6173E-203 KO | Nfkbia  | 0.434 |
| C3      | 3.1201E-207 | 3.59045396 | 0.446 | 0.044 | 9.6888E-203 KO | C3      | 0.402 |
| Zfp36   | 4.373E-206  | 2.96403315 | 0.907 | 0.469 | 1.3579E-201 KO | Zfp36   | 0.438 |
| Nfkbie  | 9.7834E-205 | 3.37678934 | 0.374 | 0.022 | 3.038E-200 KO  | Nfkbie  | 0.352 |
| Pim1    | 1.5473E-204 | 2.39409889 | 0.885 | 0.378 | 4.805E-200 KO  | Pim1    | 0.507 |
| Samhd1  | 2.7602E-201 | 2.34608617 | 0.869 | 0.385 | 8.5713E-197 KO | Samhd1  | 0.484 |
| Cd14    | 1.8582E-197 | 2.64177241 | 0.818 | 0.331 | 5.7704E-193 KO | Cd14    | 0.487 |
| Slamf8  | 7.0108E-197 | 2.85931546 | 0.497 | 0.067 | 2.1771E-192 KO | Slamf8  | 0.43  |
| Hbegf   | 9.8658E-195 | 4.96637258 | 0.302 | 0.009 | 3.0636E-190 KO | Hbegf   | 0.293 |
| B2m     | 6.0079E-194 | 1.17952056 | 0.98  | 0.943 | 1.8656E-189 KO | B2m     | 0.037 |
| Nr4a3   | 2.3479E-192 | 4.67619994 | 0.302 | 0.01  | 7.291E-188 KO  | Nr4a3   | 0.292 |
| Klf6    | 5.4867E-192 | 2.04290327 | 0.928 | 0.56  | 1.7038E-187 KO | Klf6    | 0.368 |
| H2-DMb1 | 3.2666E-189 | 2.35683136 | 0.754 | 0.248 | 1.0144E-184 KO | H2-DMb1 | 0.506 |
| Il1rn   | 8.7774E-187 | 2.89621691 | 0.736 | 0.24  | 2.7257E-182 KO | Il1rn   | 0.496 |
| Cxcl2   | 7.0371E-186 | 2.05168167 | 0.761 | 0.245 | 2.1852E-181 KO | Cxcl2   | 0.516 |
| Nfkbiz  | 3.6252E-183 | 2.90809628 | 0.684 | 0.192 | 1.1257E-178 KO | Nfkbiz  | 0.492 |
| H2-D1   | 5.0295E-183 | 1.2261289  | 0.975 | 0.901 | 1.5618E-178 KO | H2-D1   | 0.074 |
| Gbp4    | 2.7677E-182 | 2.96590945 | 0.433 | 0.05  | 8.5946E-178 KO | Gbp4    | 0.383 |
| Klf4    | 1.5109E-180 | 2.79775469 | 0.652 | 0.162 | 4.6919E-176 KO | Klf4    | 0.49  |
| Jund    | 4.2645E-180 | 1.91107993 | 0.964 | 0.673 | 1.3243E-175 KO | Jund    | 0.291 |
| Gpr35   | 3.367E-179  | 2.48969037 | 0.511 | 0.083 | 1.0455E-174 KO | Gpr35   | 0.428 |
| Fam26f  | 4.0812E-178 | 3.37166592 | 0.473 | 0.072 | 1.2673E-173 KO | Fam26f  | 0.401 |
| Mmp19   | 3.0147E-176 | 3.28784755 | 0.463 | 0.067 | 9.3614E-172 KO | Mmp19   | 0.396 |
| Gbp2b   | 4.6791E-176 | 5.94533661 | 0.254 | 0.004 | 1.453E-171 KO  | Gbp2b   | 0.25  |
| Cish    | 2.7753E-173 | 4.37711999 | 0.282 | 0.011 | 8.6183E-169 KO | Cish    | 0.271 |
| Irgm1   | 9.3531E-171 | 2.74364595 | 0.457 | 0.066 | 2.9044E-166 KO | Irgm1   | 0.391 |
| Cybb    | 2.919E-168  | 1.85843228 | 0.865 | 0.517 | 9.0644E-164 KO | Cybb    | 0.348 |
| Adgre5  | 1.3736E-167 | 2.33529943 | 0.538 | 0.098 | 4.2656E-163 KO | Adgre5  | 0.44  |
| Socs3   | 3.6846E-167 | 2.35895711 | 0.729 | 0.239 | 1.1442E-162 KO | Socs3   | 0.49  |
| Dusp1   | 9.9375E-166 | 2.2018539  | 0.923 | 0.61  | 3.0859E-161 KO | Dusp1   | 0.313 |
| Tapbp   | 1.7067E-165 | 1.81925071 | 0.834 | 0.395 | 5.2998E-161 KO | Tapbp   | 0.439 |
| Nr4a2   | 7.4842E-164 | 3.37399727 | 0.311 | 0.02  | 2.3241E-159 KO | Nr4a2   | 0.291 |
| Ralgds  | 4.5603E-163 | 2.43939162 | 0.505 | 0.089 | 1.4161E-158 KO | Ralgds  | 0.416 |
| Gm6377  | 6.0997E-163 | 2.43395421 | 0.509 | 0.091 | 1.8941E-158 KO | Gm6377  | 0.418 |
| Rcan1   | 3.2358E-162 | 3.52603585 | 0.385 | 0.045 | 1.0048E-157 KO | Rcan1   | 0.34  |
| Ptafr   | 7.9573E-162 | 2.21002684 | 0.599 | 0.136 | 2.471E-157 KO  | Ptafr   | 0.463 |
| Tnf     | 1.0187E-160 | 3.4639782  | 0.506 | 0.099 | 3.1633E-156 KO | Tnf     | 0.407 |
| Plekho2 | 1.8203E-160 | 1.80832043 | 0.742 | 0.251 | 5.6526E-156 KO | Plekho2 | 0.491 |
| Mefv    | 1.0793E-159 | 3.05171932 | 0.314 | 0.022 | 3.3516E-155 KO | Mefv    | 0.292 |
| Ly86    | 1.3666E-159 | 2.06719585 | 0.826 | 0.412 | 4.2436E-155 KO | Ly86    | 0.414 |
| Nfkbid  | 2.7206E-157 | 3.2007227  | 0.36  | 0.038 | 8.4482E-153 KO | Nfkbid  | 0.322 |
| Laptm5  | 9.6779E-157 | 1.22154796 | 0.951 | 0.789 | 3.0053E-152 KO | Laptm5  | 0.162 |
| Fgl2    | 2.5763E-153 | 2.31283458 | 0.75  | 0.31  | 8.0001E-149 KO | Fgl2    | 0.44  |
| Pabpc1  | 5.4867E-152 | 1.53714079 | 0.924 | 0.641 | 1.7038E-147 KO | Pabpc1  | 0.283 |
| Ifrd1   | 6.164E-151  | 2.42505395 | 0.752 | 0.288 | 1.9141E-146 KO | Ifrd1   | 0.464 |
| Prdm1   | 3.1498E-150 | 2.75022432 | 0.344 | 0.035 | 9.7809E-146 KO | Prdm1   | 0.309 |

|             |             |            |       |       |                |            |       |
|-------------|-------------|------------|-------|-------|----------------|------------|-------|
| Nfkb1       | 1.1451E-147 | 2.27323776 | 0.634 | 0.173 | 3.556E-143 KO  | Nfkb1      | 0.461 |
| Casp4       | 2.6001E-147 | 2.02761857 | 0.498 | 0.095 | 8.0741E-143 KO | Casp4      | 0.403 |
| Fosl2       | 3.9793E-143 | 2.00815664 | 0.668 | 0.195 | 1.2357E-138 KO | Fosl2      | 0.473 |
| Ell2        | 8.7431E-142 | 2.35950462 | 0.497 | 0.102 | 2.715E-137 KO  | Ell2       | 0.395 |
| Gbp5        | 2.7295E-141 | 3.08762026 | 0.344 | 0.041 | 8.4761E-137 KO | Gbp5       | 0.303 |
| Plek        | 4.9239E-141 | 1.72544244 | 0.856 | 0.483 | 1.529E-136 KO  | Plek       | 0.373 |
| Ctss        | 2.0377E-140 | 1.50905368 | 0.971 | 0.899 | 6.3276E-136 KO | Ctss       | 0.072 |
| Ciita       | 1.9995E-139 | 3.12823267 | 0.242 | 0.011 | 6.2091E-135 KO | Ciita      | 0.231 |
| Tap2        | 3.0161E-138 | 1.96648883 | 0.562 | 0.137 | 9.3658E-134 KO | Tap2       | 0.425 |
| Nfe2l2      | 3.0816E-137 | 1.93388149 | 0.686 | 0.23  | 9.5693E-133 KO | Nfe2l2     | 0.456 |
| Ier2        | 1.2864E-135 | 2.48933456 | 0.652 | 0.205 | 3.9947E-131 KO | Ier2       | 0.447 |
| Gbp2        | 2.7409E-135 | 2.32550622 | 0.662 | 0.227 | 8.5113E-131 KO | Gbp2       | 0.435 |
| Nrros       | 9.228E-135  | 1.8909126  | 0.649 | 0.202 | 2.8656E-130 KO | Nrros      | 0.447 |
| Ccl4        | 1.4762E-134 | 2.18573976 | 0.778 | 0.339 | 4.584E-130 KO  | Ccl4       | 0.439 |
| Ier5        | 2.5926E-133 | 1.79532241 | 0.794 | 0.347 | 8.0508E-129 KO | Ier5       | 0.447 |
| Plbd1       | 1.0014E-132 | 2.18918776 | 0.717 | 0.273 | 3.1098E-128 KO | Plbd1      | 0.444 |
| Itga4       | 3.1875E-132 | 2.12628061 | 0.482 | 0.1   | 9.8982E-128 KO | Itga4      | 0.382 |
| Rab7b       | 3.279E-132  | 1.82663144 | 0.714 | 0.268 | 1.0182E-127 KO | Rab7b      | 0.446 |
| Ahnak       | 7.3562E-132 | 1.61027274 | 0.887 | 0.55  | 2.2843E-127 KO | Ahnak      | 0.337 |
| Ccr12       | 8.9274E-132 | 1.75154547 | 0.614 | 0.173 | 2.7722E-127 KO | Ccr12      | 0.441 |
| Sema4a      | 3.0267E-131 | 2.49828782 | 0.348 | 0.045 | 9.3987E-127 KO | Sema4a     | 0.303 |
| Rasgef1b    | 7.6117E-131 | 1.95713286 | 0.554 | 0.14  | 2.3637E-126 KO | Rasgef1b   | 0.414 |
| Dusp2       | 8.4975E-131 | 3.24336626 | 0.393 | 0.067 | 2.6387E-126 KO | Dusp2      | 0.326 |
| Maff        | 2.77E-130   | 2.39290287 | 0.326 | 0.038 | 8.6018E-126 KO | Maff       | 0.288 |
| H2-Q7       | 5.4813E-130 | 1.61507717 | 0.662 | 0.208 | 1.7021E-125 KO | H2-Q7      | 0.454 |
| Iigp1       | 5.4858E-128 | 2.65381    | 0.423 | 0.081 | 1.7035E-123 KO | Iigp1      | 0.342 |
| Lacc1       | 2.3429E-124 | 2.1438968  | 0.449 | 0.091 | 7.2753E-120 KO | Lacc1      | 0.358 |
| Cnn3        | 2.7504E-124 | 2.57222854 | 0.315 | 0.038 | 8.5407E-120 KO | Cnn3       | 0.277 |
| Tec         | 3.0151E-124 | 2.34426135 | 0.314 | 0.037 | 9.3628E-120 KO | Tec        | 0.277 |
| Dot1l       | 3.2343E-124 | 2.01833478 | 0.425 | 0.078 | 1.0044E-119 KO | Dot1l      | 0.347 |
| Ubc         | 8.2339E-123 | 1.36033374 | 0.908 | 0.7   | 2.5569E-118 KO | Ubc        | 0.208 |
| Sema4d      | 2.2368E-122 | 2.0139676  | 0.35  | 0.05  | 6.9459E-118 KO | Sema4d     | 0.3   |
| Fos         | 2.1329E-121 | 1.69492043 | 0.844 | 0.436 | 6.6232E-117 KO | Fos        | 0.408 |
| Mndal       | 2.7151E-121 | 1.76057516 | 0.649 | 0.21  | 8.4313E-117 KO | Mndal      | 0.439 |
| Plk2        | 3.2533E-121 | 1.88398923 | 0.59  | 0.179 | 1.0102E-116 KO | Plk2       | 0.411 |
| Prcp        | 3.2842E-121 | 1.64553265 | 0.69  | 0.242 | 1.0199E-116 KO | Prcp       | 0.448 |
| Stxbp3      | 1.8302E-120 | 1.78484725 | 0.537 | 0.137 | 5.6832E-116 KO | Stxbp3     | 0.4   |
| Il2rg       | 1.4016E-119 | 2.01403545 | 0.398 | 0.072 | 4.3524E-115 KO | Il2rg      | 0.326 |
| H2-DMa      | 4.8134E-119 | 1.72229008 | 0.777 | 0.419 | 1.4947E-114 KO | H2-DMa     | 0.358 |
| Il18bp      | 5.2514E-119 | 2.16603895 | 0.549 | 0.163 | 1.6307E-114 KO | Il18bp     | 0.386 |
| Naaa        | 5.8932E-119 | 2.16762999 | 0.669 | 0.255 | 1.83E-114 KO   | Naaa       | 0.414 |
| Cd44        | 1.4226E-118 | 1.66161238 | 0.832 | 0.452 | 4.4177E-114 KO | Cd44       | 0.38  |
| Ccr2        | 2.0325E-118 | 2.27505899 | 0.513 | 0.141 | 6.3116E-114 KO | Ccr2       | 0.372 |
| Cox17       | 1.0545E-117 | 1.60019845 | 0.642 | 0.208 | 3.2747E-113 KO | Cox17      | 0.434 |
| Csf2rb      | 8.9761E-117 | 1.4905097  | 0.626 | 0.193 | 2.7873E-112 KO | Csf2rb     | 0.433 |
| 4930523C07R | 1.035E-116  | 2.20580862 | 0.355 | 0.056 | 3.2138E-112 KO | 4930523C07 | 0.299 |
| Actg1       | 2.5375E-116 | 0.94717638 | 0.979 | 0.961 | 7.8796E-112 KO | Actg1      | 0.018 |
| H2-T22      | 2.7517E-116 | 1.67980188 | 0.582 | 0.175 | 8.5449E-112 KO | H2-T22     | 0.407 |
| Prkcd       | 7.7032E-116 | 1.72203519 | 0.658 | 0.226 | 2.3921E-111 KO | Prkcd      | 0.432 |
| Slc15a3     | 1.2679E-115 | 1.50246806 | 0.698 | 0.267 | 3.9372E-111 KO | Slc15a3    | 0.431 |
| Cyth1       | 1.3124E-115 | 1.83369989 | 0.485 | 0.113 | 4.0755E-111 KO | Cyth1      | 0.372 |
| Gatm        | 9.3418E-115 | 1.88415642 | 0.75  | 0.332 | 2.9009E-110 KO | Gatm       | 0.418 |
| Myadm       | 2.2154E-114 | 1.94844008 | 0.431 | 0.09  | 6.8795E-110 KO | Myadm      | 0.341 |
| Plaur       | 4.8243E-114 | 1.71021244 | 0.697 | 0.293 | 1.4981E-109 KO | Plaur      | 0.404 |

|           |             |            |       |       |                |           |       |
|-----------|-------------|------------|-------|-------|----------------|-----------|-------|
| Birc3     | 7.1286E-114 | 1.92162896 | 0.43  | 0.089 | 2.2136E-109 KO | Birc3     | 0.341 |
| Gbp3      | 1.4184E-113 | 2.11851257 | 0.418 | 0.088 | 4.4045E-109 KO | Gbp3      | 0.33  |
| Ahr       | 3.174E-113  | 2.86599513 | 0.254 | 0.024 | 9.8562E-109 KO | Ahr       | 0.23  |
| Tob2      | 5.4684E-113 | 2.02451755 | 0.485 | 0.12  | 1.6981E-108 KO | Tob2      | 0.365 |
| Batf2     | 6.6182E-113 | 3.08705344 | 0.256 | 0.025 | 2.0552E-108 KO | Batf2     | 0.231 |
| Ddx17     | 1.1687E-112 | 1.57061475 | 0.585 | 0.167 | 3.6292E-108 KO | Ddx17     | 0.418 |
| Atp2b1    | 2.0485E-112 | 1.28068928 | 0.899 | 0.608 | 6.3612E-108 KO | Atp2b1    | 0.291 |
| Btg1      | 1.2076E-111 | 1.36208909 | 0.917 | 0.66  | 3.75E-107 KO   | Btg1      | 0.257 |
| Adora2b   | 2.4578E-111 | 3.17837244 | 0.215 | 0.014 | 7.6323E-107 KO | Adora2b   | 0.201 |
| Ldlr      | 4.7891E-111 | 2.22276871 | 0.368 | 0.065 | 1.4872E-106 KO | Ldlr      | 0.303 |
| Ly6a      | 5.9809E-111 | 1.95623233 | 0.644 | 0.246 | 1.8572E-106 KO | Ly6a      | 0.398 |
| Mpeg1     | 1.5192E-110 | 1.2902706  | 0.866 | 0.658 | 4.7175E-106 KO | Mpeg1     | 0.208 |
| Serpina3f | 3.8911E-110 | 3.56675424 | 0.206 | 0.012 | 1.2083E-105 KO | Serpina3f | 0.194 |
| Tap1      | 4.8221E-110 | 1.58826133 | 0.708 | 0.298 | 1.4974E-105 KO | Tap1      | 0.41  |
| Sdc3      | 9.1036E-110 | 1.48459499 | 0.825 | 0.509 | 2.8269E-105 KO | Sdc3      | 0.316 |
| Ccl24     | 9.097E-109  | 4.64005656 | 0.239 | 0.023 | 2.8249E-104 KO | Ccl24     | 0.216 |
| Ifi47     | 1.5955E-108 | 2.10889179 | 0.462 | 0.115 | 4.9545E-104 KO | Ifi47     | 0.347 |
| Ifi203    | 4.1534E-108 | 1.57067827 | 0.566 | 0.171 | 1.2898E-103 KO | Ifi203    | 0.395 |
| Gbp7      | 4.815E-108  | 2.0250112  | 0.495 | 0.135 | 1.4952E-103 KO | Gbp7      | 0.36  |
| Psme2b    | 4.8308E-108 | 2.96786131 | 0.211 | 0.014 | 1.5001E-103 KO | Psme2b    | 0.197 |
| Cers6     | 9.9762E-108 | 1.68439237 | 0.41  | 0.084 | 3.0979E-103 KO | Cers6     | 0.326 |
| Bach1     | 1.2825E-107 | 1.89637527 | 0.602 | 0.199 | 3.9825E-103 KO | Bach1     | 0.403 |
| Slc39a1   | 1.9031E-107 | 1.67612802 | 0.545 | 0.153 | 5.9096E-103 KO | Slc39a1   | 0.392 |
| Igtp      | 9.9232E-107 | 2.2437115  | 0.374 | 0.073 | 3.0814E-102 KO | Igtp      | 0.301 |
| Clic4     | 4.2786E-106 | 1.55930221 | 0.704 | 0.291 | 1.3286E-101 KO | Clic4     | 0.413 |
| Ly6c2     | 6.5137E-106 | 2.58552691 | 0.338 | 0.058 | 2.0227E-101 KO | Ly6c2     | 0.28  |
| Plk3      | 8.151E-106  | 1.79505227 | 0.419 | 0.091 | 2.5311E-101 KO | Plk3      | 0.328 |
| Lrrc8c    | 2.1656E-105 | 1.93845447 | 0.359 | 0.065 | 6.7249E-101 KO | Lrrc8c    | 0.294 |
| Ptpn2     | 3.6467E-105 | 2.20618158 | 0.406 | 0.086 | 1.1324E-100 KO | Ptpn2     | 0.32  |
| Mid1      | 4.127E-105  | 2.28542299 | 0.27  | 0.033 | 1.2815E-100 KO | Mid1      | 0.237 |
| Glipr2    | 9.606E-105  | 2.07866556 | 0.33  | 0.053 | 2.9829E-100 KO | Glipr2    | 0.277 |
| Crip1     | 1.813E-104  | 1.40190585 | 0.945 | 0.791 | 5.63E-100 KO   | Crip1     | 0.154 |
| Nabp1     | 4.5533E-104 | 2.15628672 | 0.348 | 0.062 | 1.4139E-99 KO  | Nabp1     | 0.286 |
| Sowahc    | 1.8516E-103 | 2.24441037 | 0.407 | 0.089 | 5.7499E-99 KO  | Sowahc    | 0.318 |
| Hsd17b11  | 1.4186E-102 | 1.65246021 | 0.462 | 0.114 | 4.40507E-98 KO | Hsd17b11  | 0.348 |
| Rab11fip1 | 2.1685E-102 | 2.39704839 | 0.243 | 0.025 | 6.73389E-98 KO | Rab11fip1 | 0.218 |
| Vim       | 2.9471E-102 | 0.82850135 | 0.975 | 0.946 | 9.15163E-98 KO | Vim       | 0.029 |
| Cd300a    | 6.0732E-102 | 1.55405632 | 0.605 | 0.211 | 1.88591E-97 KO | Cd300a    | 0.394 |
| Rab20     | 1.0682E-101 | 1.58951571 | 0.482 | 0.124 | 3.3171E-97 KO  | Rab20     | 0.358 |
| Atxn2l    | 4.5283E-101 | 1.43152408 | 0.486 | 0.123 | 1.40618E-96 KO | Atxn2l    | 0.363 |
| Cox20     | 5.6515E-101 | 1.77709839 | 0.443 | 0.105 | 1.75495E-96 KO | Cox20     | 0.338 |
| Ppp1r15a  | 5.7717E-101 | 2.09544976 | 0.613 | 0.222 | 1.79227E-96 KO | Ppp1r15a  | 0.391 |
| Il10ra    | 9.2499E-101 | 1.54250473 | 0.487 | 0.128 | 2.87239E-96 KO | Il10ra    | 0.359 |
| Gadd45b   | 1.6121E-100 | 1.44872565 | 0.7   | 0.297 | 5.00592E-96 KO | Gadd45b   | 0.403 |
| Il1a      | 2.1461E-100 | 2.97566606 | 0.223 | 0.021 | 6.66415E-96 KO | Il1a      | 0.202 |
| Al504432  | 2.3503E-100 | 2.37596963 | 0.295 | 0.045 | 7.29837E-96 KO | Al504432  | 0.25  |
| Slfn2     | 5.123E-100  | 1.3855153  | 0.836 | 0.519 | 1.59086E-95 KO | Slfn2     | 0.317 |
| Itgb7     | 2.536E-99   | 1.61277432 | 0.368 | 0.072 | 7.8749E-95 KO  | Itgb7     | 0.296 |
| Ncf2      | 2.639E-99   | 1.35301177 | 0.753 | 0.348 | 8.19496E-95 KO | Ncf2      | 0.405 |
| Eif3j2    | 3.4122E-99  | 3.80935899 | 0.146 | 0.002 | 1.05958E-94 KO | Eif3j2    | 0.144 |
| Cfap43    | 4.0973E-99  | 2.03748019 | 0.256 | 0.031 | 1.27235E-94 KO | Cfap43    | 0.225 |
| Traf1     | 5.1614E-99  | 2.31184828 | 0.303 | 0.048 | 1.60278E-94 KO | Traf1     | 0.255 |
| Kctd12    | 8.0489E-99  | 1.85275957 | 0.706 | 0.315 | 2.49942E-94 KO | Kctd12    | 0.391 |
| Serpina3g | 1.64139E-98 | 2.23110975 | 0.379 | 0.083 | 5.09701E-94 KO | Serpina3g | 0.296 |

|          |             |            |       |       |                |          |       |
|----------|-------------|------------|-------|-------|----------------|----------|-------|
| Sqstm1   | 2.02264E-98 | 1.7847702  | 0.68  | 0.273 | 6.2809E-94 KO  | Sqstm1   | 0.407 |
| Klf2     | 3.04834E-98 | 1.79313278 | 0.642 | 0.247 | 9.466E-94 KO   | Klf2     | 0.395 |
| Hk3      | 4.46196E-98 | 1.57056594 | 0.617 | 0.24  | 1.38557E-93 KO | Hk3      | 0.377 |
| Ptpn12   | 5.27542E-98 | 1.81332652 | 0.394 | 0.086 | 1.63818E-93 KO | Ptpn12   | 0.308 |
| Mgl2     | 1.77763E-97 | 4.48879496 | 0.2   | 0.016 | 5.52007E-93 KO | Mgl2     | 0.184 |
| Ppp1r15b | 2.74286E-97 | 1.43256888 | 0.523 | 0.15  | 8.51739E-93 KO | Ppp1r15b | 0.373 |
| Zc3h12a  | 2.9753E-97  | 1.61584111 | 0.425 | 0.101 | 9.23919E-93 KO | Zc3h12a  | 0.324 |
| Nfil3    | 6.29352E-97 | 1.34066085 | 0.574 | 0.18  | 1.95433E-92 KO | Nfil3    | 0.394 |
| Npc2     | 3.13536E-96 | 0.87428693 | 0.935 | 0.874 | 9.73625E-92 KO | Npc2     | 0.061 |
| Ptprc    | 1.51333E-95 | 1.33507036 | 0.818 | 0.439 | 4.69933E-91 KO | Ptprc    | 0.379 |
| Noct     | 1.43401E-94 | 1.56925349 | 0.491 | 0.14  | 4.45302E-90 KO | Noct     | 0.351 |
| Creg1    | 2.34202E-94 | 1.90506673 | 0.8   | 0.474 | 7.27267E-90 KO | Creg1    | 0.326 |
| Ndel1    | 1.54704E-93 | 1.37327816 | 0.57  | 0.183 | 4.80401E-89 KO | Ndel1    | 0.387 |
| Scimp    | 1.84246E-93 | 1.76121101 | 0.358 | 0.073 | 5.7214E-89 KO  | Scimp    | 0.285 |
| Rgl1     | 8.06697E-93 | 1.3862019  | 0.633 | 0.239 | 2.50504E-88 KO | Rgl1     | 0.394 |
| N4bp1    | 9.00653E-93 | 1.62996264 | 0.518 | 0.156 | 2.7968E-88 KO  | N4bp1    | 0.362 |
| Susd6    | 2.12222E-92 | 1.63163769 | 0.386 | 0.086 | 6.59012E-88 KO | Susd6    | 0.3   |
| Myo1f    | 4.67324E-92 | 1.39189276 | 0.523 | 0.162 | 1.45118E-87 KO | Myo1f    | 0.361 |
| Slc7a2   | 1.00376E-91 | 2.71436704 | 0.276 | 0.043 | 3.11697E-87 KO | Slc7a2   | 0.233 |
| Rilpl2   | 1.02171E-91 | 1.27357456 | 0.677 | 0.274 | 3.17271E-87 KO | Rilpl2   | 0.403 |
| Rnase6   | 1.77878E-91 | 2.61256883 | 0.211 | 0.021 | 5.52363E-87 KO | Rnase6   | 0.19  |
| Spag9    | 2.91572E-91 | 1.41618534 | 0.593 | 0.205 | 9.05417E-87 KO | Spag9    | 0.388 |
| Olr1     | 1.52589E-90 | 4.42979081 | 0.14  | 0.004 | 4.73836E-86 KO | Olr1     | 0.136 |
| Irf4     | 2.18062E-90 | 5.02021475 | 0.134 | 0.002 | 6.77148E-86 KO | Irf4     | 0.132 |
| Phlda1   | 4.53484E-90 | 2.56852845 | 0.401 | 0.103 | 1.4082E-85 KO  | Phlda1   | 0.298 |
| Rnf213   | 5.42458E-90 | 1.50636141 | 0.469 | 0.135 | 1.68449E-85 KO | Rnf213   | 0.334 |
| Etv3     | 4.39926E-89 | 2.0495045  | 0.437 | 0.119 | 1.3661E-84 KO  | Etv3     | 0.318 |
| Itm2c    | 6.11901E-89 | 1.39318067 | 0.722 | 0.35  | 1.90014E-84 KO | Itm2c    | 0.372 |
| Tmcc3    | 6.57046E-89 | 2.17963926 | 0.259 | 0.038 | 2.04032E-84 KO | Tmcc3    | 0.221 |
| Marcksl1 | 7.44188E-88 | 2.53650204 | 0.477 | 0.158 | 2.31093E-83 KO | Marcksl1 | 0.319 |
| Osm      | 2.06176E-87 | 2.29350097 | 0.415 | 0.112 | 6.40238E-83 KO | Osm      | 0.303 |
| Pik3cd   | 2.55514E-87 | 1.64994843 | 0.454 | 0.127 | 7.93447E-83 KO | Pik3cd   | 0.327 |
| Dyrk2    | 2.75658E-87 | 1.6243692  | 0.347 | 0.073 | 8.56002E-83 KO | Dyrk2    | 0.274 |
| Arhgap31 | 3.45519E-87 | 2.01621927 | 0.383 | 0.093 | 1.07294E-82 KO | Arhgap31 | 0.29  |
| Sp140    | 4.16904E-87 | 1.51183879 | 0.418 | 0.106 | 1.29461E-82 KO | Sp140    | 0.312 |
| Sirpa    | 7.95476E-87 | 1.13656653 | 0.86  | 0.6   | 2.47019E-82 KO | Sirpa    | 0.26  |
| Sdc4     | 2.12389E-86 | 1.85146426 | 0.828 | 0.55  | 6.59533E-82 KO | Sdc4     | 0.278 |
| Clec10a  | 3.92047E-86 | 3.00223012 | 0.439 | 0.129 | 1.21742E-81 KO | Clec10a  | 0.31  |
| Rgs2     | 6.41312E-86 | 1.86464867 | 0.577 | 0.219 | 1.99147E-81 KO | Rgs2     | 0.358 |
| Hif1a    | 7.24302E-86 | 1.4337054  | 0.666 | 0.276 | 2.24918E-81 KO | Hif1a    | 0.39  |
| Anpep    | 1.1271E-85  | 1.71076308 | 0.491 | 0.164 | 3.49997E-81 KO | Anpep    | 0.327 |
| Plxnd1   | 1.20821E-85 | 1.63748079 | 0.409 | 0.105 | 3.75187E-81 KO | Plxnd1   | 0.304 |
| Nfkb2    | 1.52649E-85 | 2.0194056  | 0.288 | 0.051 | 4.74021E-81 KO | Nfkb2    | 0.237 |
| Cxcl10   | 1.76642E-85 | 2.5230755  | 0.371 | 0.094 | 5.48526E-81 KO | Cxcl10   | 0.277 |
| St8sia4  | 3.17681E-85 | 1.50759919 | 0.375 | 0.086 | 9.86496E-81 KO | St8sia4  | 0.289 |
| Pmaip1   | 4.077E-85   | 2.67859156 | 0.247 | 0.037 | 1.26603E-80 KO | Pmaip1   | 0.21  |
| Cxcr4    | 5.44067E-85 | 1.50005223 | 0.525 | 0.175 | 1.68949E-80 KO | Cxcr4    | 0.35  |
| Tmbim6   | 7.49124E-85 | 1.0539091  | 0.833 | 0.586 | 2.32625E-80 KO | Tmbim6   | 0.247 |
| Tnfrsf1b | 8.30348E-85 | 1.18054533 | 0.618 | 0.223 | 2.57848E-80 KO | Tnfrsf1b | 0.395 |
| Coro2a   | 9.46554E-85 | 1.6556115  | 0.355 | 0.079 | 2.93933E-80 KO | Coro2a   | 0.276 |
| Il6      | 2.42025E-84 | 6.55720404 | 0.119 | 0.001 | 7.51562E-80 KO | Il6      | 0.118 |
| Stx3     | 5.86011E-84 | 1.36523192 | 0.356 | 0.079 | 1.81974E-79 KO | Stx3     | 0.277 |
| Sp110    | 6.9439E-84  | 1.46604978 | 0.479 | 0.142 | 2.15629E-79 KO | Sp110    | 0.337 |
| Zyx      | 7.029E-84   | 1.38022941 | 0.749 | 0.388 | 2.18272E-79 KO | Zyx      | 0.361 |

|          |             |            |       |       |             |    |          |       |
|----------|-------------|------------|-------|-------|-------------|----|----------|-------|
| Akap13   | 1.85972E-83 | 1.28077846 | 0.642 | 0.257 | 5.77498E-79 | KO | Akap13   | 0.385 |
| Mcl1     | 2.31608E-83 | 0.83625307 | 0.936 | 0.819 | 7.19211E-79 | KO | Mcl1     | 0.117 |
| Grb2     | 3.61497E-83 | 1.13703165 | 0.785 | 0.449 | 1.12256E-78 | KO | Grb2     | 0.336 |
| Il6ra    | 3.89957E-83 | 1.48116501 | 0.413 | 0.108 | 1.21093E-78 | KO | Il6ra    | 0.305 |
| Chd7     | 5.10264E-83 | 1.41172496 | 0.453 | 0.13  | 1.58452E-78 | KO | Chd7     | 0.323 |
| Rnaset2a | 7.5895E-83  | 2.12852565 | 0.243 | 0.035 | 2.35677E-78 | KO | Rnaset2a | 0.208 |
| Dennd4a  | 1.07748E-82 | 1.75415508 | 0.457 | 0.134 | 3.3459E-78  | KO | Dennd4a  | 0.323 |
| Rnase2a  | 1.79444E-82 | 6.86002072 | 0.124 | 0.003 | 5.57229E-78 | KO | Rnase2a  | 0.121 |
| Stat3    | 2.07689E-82 | 1.32139976 | 0.632 | 0.247 | 6.44937E-78 | KO | Stat3    | 0.385 |
| Cd40     | 2.6642E-82  | 1.71058391 | 0.352 | 0.08  | 8.27313E-78 | KO | Cd40     | 0.272 |
| Stk40    | 2.77999E-82 | 1.667814   | 0.296 | 0.055 | 8.63271E-78 | KO | Stk40    | 0.241 |
| Brd2     | 3.52336E-82 | 1.28262403 | 0.621 | 0.24  | 1.09411E-77 | KO | Brd2     | 0.381 |
| Tppp3    | 7.06565E-82 | 2.57011017 | 0.211 | 0.025 | 2.1941E-77  | KO | Tppp3    | 0.186 |
| Mthfs    | 1.14124E-81 | 1.49443466 | 0.259 | 0.041 | 3.54389E-77 | KO | Mthfs    | 0.218 |
| Tagap1   | 1.31206E-81 | 2.48383127 | 0.194 | 0.02  | 4.07433E-77 | KO | Tagap1   | 0.174 |
| Vwa5a    | 3.54461E-81 | 1.54546881 | 0.515 | 0.17  | 1.10071E-76 | KO | Vwa5a    | 0.345 |
| Marcks   | 3.69995E-81 | 1.13679199 | 0.884 | 0.634 | 1.14894E-76 | KO | Marcks   | 0.25  |
| Gas7     | 6.25988E-81 | 1.67067927 | 0.355 | 0.083 | 1.94388E-76 | KO | Gas7     | 0.272 |
| Cyfip1   | 1.04452E-80 | 1.22579758 | 0.692 | 0.307 | 3.24354E-76 | KO | Cyfip1   | 0.385 |
| Ly9      | 1.05483E-80 | 1.54363601 | 0.418 | 0.114 | 3.27555E-76 | KO | Ly9      | 0.304 |
| Tmbim1   | 3.59009E-80 | 1.6163871  | 0.385 | 0.097 | 1.11483E-75 | KO | Tmbim1   | 0.288 |
| Ptger4   | 8.87433E-80 | 2.02164585 | 0.287 | 0.055 | 2.75574E-75 | KO | Ptger4   | 0.232 |
| Hivep2   | 9.81633E-80 | 1.74294167 | 0.308 | 0.064 | 3.04827E-75 | KO | Hivep2   | 0.244 |
| F10      | 1.34416E-79 | 1.41662857 | 0.441 | 0.127 | 4.17402E-75 | KO | F10      | 0.314 |
| Slnf8    | 2.48634E-79 | 1.72483167 | 0.263 | 0.045 | 7.72083E-75 | KO | Slnf8    | 0.218 |
| Mob1a    | 3.59974E-79 | 1.25655437 | 0.661 | 0.273 | 1.11783E-74 | KO | Mob1a    | 0.388 |
| Klrrk1   | 4.01515E-79 | 2.81444062 | 0.183 | 0.018 | 1.24682E-74 | KO | Klrrk1   | 0.165 |
| Mapkapk2 | 1.62646E-78 | 1.2731104  | 0.725 | 0.362 | 5.05064E-74 | KO | Mapkapk2 | 0.363 |
| Tapbpl   | 2.59556E-78 | 2.38008909 | 0.231 | 0.034 | 8.05999E-74 | KO | Tapbpl   | 0.197 |
| Pirb     | 3.30113E-78 | 1.10936359 | 0.685 | 0.298 | 1.0251E-73  | KO | Pirb     | 0.387 |
| Unc93b1  | 5.48194E-78 | 0.99257445 | 0.844 | 0.589 | 1.70231E-73 | KO | Unc93b1  | 0.255 |
| Csf3r    | 7.09623E-78 | 1.34041589 | 0.343 | 0.079 | 2.20359E-73 | KO | Csf3r    | 0.264 |
| H2-Q6    | 1.36021E-77 | 1.27650995 | 0.311 | 0.065 | 4.22385E-73 | KO | H2-Q6    | 0.246 |
| Soat1    | 1.58666E-77 | 1.23792647 | 0.644 | 0.273 | 4.92707E-73 | KO | Soat1    | 0.371 |
| Map2k3   | 2.40985E-77 | 1.51245202 | 0.498 | 0.164 | 7.48332E-73 | KO | Map2k3   | 0.334 |
| Tlr12    | 2.53005E-77 | 3.52277099 | 0.127 | 0.005 | 7.85656E-73 | KO | Tlr12    | 0.122 |
| Srxn1    | 2.68053E-77 | 2.30517559 | 0.316 | 0.072 | 8.32384E-73 | KO | Srxn1    | 0.244 |
| Neurl3   | 2.97856E-77 | 1.47331968 | 0.403 | 0.108 | 9.24933E-73 | KO | Neurl3   | 0.295 |
| Dnase1l3 | 3.60626E-77 | 3.19644306 | 0.127 | 0.005 | 1.11985E-72 | KO | Dnase1l3 | 0.122 |
| Samd4b   | 4.20144E-77 | 1.22740992 | 0.372 | 0.091 | 1.30467E-72 | KO | Samd4b   | 0.281 |
| Ptpre    | 5.95333E-77 | 1.30984592 | 0.533 | 0.187 | 1.84869E-72 | KO | Ptpre    | 0.346 |
| Skil     | 8.14919E-77 | 1.18418471 | 0.506 | 0.167 | 2.53057E-72 | KO | Skil     | 0.339 |
| mt-Nd3   | 1.27239E-76 | 1.35431526 | 0.813 | 0.456 | 3.95116E-72 | KO | mt-Nd3   | 0.357 |
| Diaph1   | 1.34377E-76 | 1.10092495 | 0.629 | 0.252 | 4.1728E-72  | KO | Diaph1   | 0.377 |
| Rock1    | 2.07282E-76 | 1.25245295 | 0.529 | 0.183 | 6.43672E-72 | KO | Rock1    | 0.346 |
| Cebpg    | 5.32746E-76 | 0.99523234 | 0.47  | 0.142 | 1.65434E-71 | KO | Cebpg    | 0.328 |
| Tbxas1   | 6.00038E-76 | 1.33157425 | 0.574 | 0.218 | 1.8633E-71  | KO | Tbxas1   | 0.356 |
| Il3ra    | 1.74158E-75 | 1.59703137 | 0.366 | 0.092 | 5.40811E-71 | KO | Il3ra    | 0.274 |
| B4galt5  | 2.21236E-75 | 1.27972023 | 0.378 | 0.098 | 6.87003E-71 | KO | B4galt5  | 0.28  |
| Rasa3    | 3.30344E-75 | 1.42584884 | 0.346 | 0.083 | 1.02582E-70 | KO | Rasa3    | 0.263 |
| Gm10036  | 5.01949E-75 | 2.30589825 | 0.226 | 0.034 | 1.5587E-70  | KO | Gm10036  | 0.192 |
| Gpr65    | 5.62623E-75 | 1.62751213 | 0.462 | 0.152 | 1.74711E-70 | KO | Gpr65    | 0.31  |
| Ctdsp2   | 1.21063E-74 | 1.31660993 | 0.47  | 0.147 | 3.75937E-70 | KO | Ctdsp2   | 0.323 |
| Cap1     | 2.13214E-74 | 1.16898333 | 0.68  | 0.308 | 6.62094E-70 | KO | Cap1     | 0.372 |

|         |             |            |       |       |             |    |         |       |
|---------|-------------|------------|-------|-------|-------------|----|---------|-------|
| Iqgap1  | 3.80306E-74 | 0.91968082 | 0.893 | 0.7   | 1.18096E-69 | KO | Iqgap1  | 0.193 |
| Rabgef1 | 3.92593E-74 | 1.46680761 | 0.332 | 0.077 | 1.21912E-69 | KO | Rabgef1 | 0.255 |
| Tgif1   | 4.13743E-74 | 1.2157473  | 0.478 | 0.154 | 1.2848E-69  | KO | Tgif1   | 0.324 |
| Rbpj    | 9.2527E-74  | 1.06972585 | 0.774 | 0.402 | 2.87324E-69 | KO | Rbpj    | 0.372 |
| Irgm2   | 1.17298E-73 | 2.34466764 | 0.184 | 0.021 | 3.64247E-69 | KO | Irgm2   | 0.163 |
| Arhgap9 | 1.31191E-73 | 1.43932658 | 0.455 | 0.142 | 4.07387E-69 | KO | Arhgap9 | 0.313 |
| Prkx    | 1.81358E-73 | 1.58032118 | 0.299 | 0.064 | 5.6317E-69  | KO | Prkx    | 0.235 |
| Crem    | 2.16412E-73 | 1.91752495 | 0.263 | 0.05  | 6.72023E-69 | KO | Crem    | 0.213 |
| Pltp    | 4.09967E-73 | 1.97725913 | 0.546 | 0.231 | 1.27307E-68 | KO | Pltp    | 0.315 |
| Gpd2    | 5.98986E-73 | 1.75495321 | 0.288 | 0.061 | 1.86003E-68 | KO | Gpd2    | 0.227 |
| Ncf1    | 7.76698E-73 | 1.29663277 | 0.549 | 0.203 | 2.41188E-68 | KO | Ncf1    | 0.346 |
| Ywhaz   | 1.21119E-72 | 1.11702161 | 0.793 | 0.435 | 3.76112E-68 | KO | Ywhaz   | 0.358 |
| Zbp1    | 1.37447E-72 | 1.25664193 | 0.549 | 0.206 | 4.26814E-68 | KO | Zbp1    | 0.343 |
| Cflar   | 1.91467E-72 | 1.21135705 | 0.613 | 0.253 | 5.94561E-68 | KO | Cflar   | 0.36  |
| Apobec3 | 2.02938E-72 | 1.61184258 | 0.422 | 0.129 | 6.30182E-68 | KO | Apobec3 | 0.293 |
| Bcl2a1d | 3.33168E-72 | 1.50047446 | 0.537 | 0.215 | 1.03459E-67 | KO | Bcl2a1d | 0.322 |
| Zfp703  | 1.00316E-71 | 1.49801681 | 0.457 | 0.152 | 3.11512E-67 | KO | Zfp703  | 0.305 |
| Slc30a1 | 1.23157E-71 | 1.62965032 | 0.355 | 0.094 | 3.82439E-67 | KO | Slc30a1 | 0.261 |
| Ubash3b | 1.76696E-71 | 1.43427942 | 0.403 | 0.117 | 5.48696E-67 | KO | Ubash3b | 0.286 |
| Fam102b | 2.0718E-71  | 1.37678269 | 0.372 | 0.101 | 6.43356E-67 | KO | Fam102b | 0.271 |
| Rin2    | 2.16298E-71 | 1.2139551  | 0.478 | 0.161 | 6.7167E-67  | KO | Rin2    | 0.317 |
| Arl5c   | 2.28897E-71 | 1.89343402 | 0.239 | 0.041 | 7.10795E-67 | KO | Arl5c   | 0.198 |
| Arhgef3 | 2.35252E-71 | 1.75801438 | 0.28  | 0.058 | 7.30527E-67 | KO | Arhgef3 | 0.222 |
| Trim25  | 3.11977E-71 | 1.28252003 | 0.586 | 0.229 | 9.68781E-67 | KO | Trim25  | 0.357 |
| Icam1   | 3.37303E-71 | 1.88838186 | 0.39  | 0.113 | 1.04743E-66 | KO | Icam1   | 0.277 |
| Entpd1  | 3.84384E-71 | 1.26058933 | 0.497 | 0.173 | 1.19363E-66 | KO | Entpd1  | 0.324 |
| Dtx3l   | 4.65285E-71 | 1.57370444 | 0.31  | 0.071 | 1.44485E-66 | KO | Dtx3l   | 0.239 |
| Fam107b | 4.91617E-71 | 1.38505404 | 0.417 | 0.125 | 1.52662E-66 | KO | Fam107b | 0.292 |
| Trafd1  | 5.27063E-71 | 1.07884582 | 0.619 | 0.258 | 1.63669E-66 | KO | Trafd1  | 0.361 |
| Cdkn1a  | 6.72563E-71 | 1.29187765 | 0.81  | 0.53  | 2.08851E-66 | KO | Cdkn1a  | 0.28  |
| Pdcd6ip | 6.87699E-71 | 1.113394   | 0.682 | 0.311 | 2.13551E-66 | KO | Pdcd6ip | 0.371 |
| Ensa    | 8.41279E-71 | 1.06281086 | 0.434 | 0.129 | 2.61242E-66 | KO | Ensa    | 0.305 |
| Socs1   | 1.5671E-70  | 2.31490056 | 0.2   | 0.028 | 4.86632E-66 | KO | Socs1   | 0.172 |
| Itgal   | 1.58856E-70 | 1.89154247 | 0.258 | 0.05  | 4.93295E-66 | KO | Itgal   | 0.208 |
| Mafb    | 1.81374E-70 | 1.39773124 | 0.832 | 0.64  | 5.6322E-66  | KO | Mafb    | 0.192 |
| Ubl3    | 2.00333E-70 | 1.10111003 | 0.69  | 0.327 | 6.22094E-66 | KO | Ubl3    | 0.363 |
| Tlr2    | 2.18355E-70 | 1.79501478 | 0.395 | 0.119 | 6.78059E-66 | KO | Tlr2    | 0.276 |
| Psmb9   | 2.64462E-70 | 1.17510953 | 0.722 | 0.398 | 8.21233E-66 | KO | Psmb9   | 0.324 |
| Aph1c   | 3.51536E-70 | 1.41403263 | 0.379 | 0.107 | 1.09162E-65 | KO | Aph1c   | 0.272 |
| Sft2d2  | 4.23919E-70 | 1.80423648 | 0.272 | 0.056 | 1.3164E-65  | KO | Sft2d2  | 0.216 |
| Prrc2a  | 4.43317E-70 | 1.10024996 | 0.535 | 0.192 | 1.37663E-65 | KO | Prrc2a  | 0.343 |
| Fgr     | 1.26254E-69 | 1.51081218 | 0.33  | 0.081 | 3.92057E-65 | KO | Fgr     | 0.249 |
| Cd36    | 1.56997E-69 | 1.77135545 | 0.613 | 0.301 | 4.87523E-65 | KO | Cd36    | 0.312 |
| Ctsk    | 1.80158E-69 | 2.9158491  | 0.211 | 0.033 | 5.59443E-65 | KO | Ctsk    | 0.178 |
| Irf8    | 2.04798E-69 | 1.66751429 | 0.709 | 0.405 | 6.35958E-65 | KO | Irf8    | 0.304 |
| Trps1   | 6.22963E-69 | 1.51770989 | 0.43  | 0.136 | 1.93449E-64 | KO | Trps1   | 0.294 |
| Coq10b  | 7.51328E-69 | 1.3034569  | 0.355 | 0.095 | 2.3331E-64  | KO | Coq10b  | 0.26  |
| Areg    | 7.64986E-69 | 5.77908331 | 0.095 | 0.001 | 2.37551E-64 | KO | Areg    | 0.094 |
| Evl     | 9.45275E-69 | 1.25765702 | 0.566 | 0.235 | 2.93536E-64 | KO | Evl     | 0.331 |
| Ppp3ca  | 1.44433E-68 | 1.16943248 | 0.522 | 0.186 | 4.48508E-64 | KO | Ppp3ca  | 0.336 |
| Ak2     | 1.47508E-68 | 1.16335895 | 0.65  | 0.304 | 4.58057E-64 | KO | Ak2     | 0.346 |
| Zswim4  | 1.62549E-68 | 1.93263799 | 0.188 | 0.025 | 5.04764E-64 | KO | Zswim4  | 0.163 |
| Trf     | 2.49449E-68 | 1.57532849 | 0.446 | 0.151 | 7.74615E-64 | KO | Trf     | 0.295 |
| Gnpda1  | 2.7985E-68  | 1.22549772 | 0.409 | 0.124 | 8.69019E-64 | KO | Gnpda1  | 0.285 |

|              |             |            |       |       |             |    |             |        |
|--------------|-------------|------------|-------|-------|-------------|----|-------------|--------|
| Gpx1         | 3.63824E-68 | 0.95095227 | 0.913 | 0.795 | 1.12978E-63 | KO | Gpx1        | 0.118  |
| Ptpro        | 4.29373E-68 | 1.59163153 | 0.267 | 0.054 | 1.33333E-63 | KO | Ptpro       | 0.213  |
| Ccl7         | 5.51114E-68 | 2.00473639 | 0.7   | 0.436 | 1.71137E-63 | KO | Ccl7        | 0.264  |
| Srf          | 5.68391E-68 | 1.47375979 | 0.294 | 0.066 | 1.76503E-63 | KO | Srf         | 0.228  |
| Cd80         | 6.10593E-68 | 2.49656953 | 0.164 | 0.017 | 1.89607E-63 | KO | Cd80        | 0.147  |
| Arsb         | 1.01151E-67 | 2.58007861 | 0.198 | 0.029 | 3.14104E-63 | KO | Arsb        | 0.169  |
| Was          | 1.3997E-67  | 1.49879056 | 0.331 | 0.084 | 4.34648E-63 | KO | Was         | 0.247  |
| Abcg1        | 1.96203E-67 | 1.2537903  | 0.519 | 0.198 | 6.0927E-63  | KO | Abcg1       | 0.321  |
| Ccl5         | 2.45533E-67 | 1.07782489 | 0.274 | 0.059 | 7.62453E-63 | KO | Ccl5        | 0.215  |
| Dck          | 3.22115E-67 | 1.82863485 | 0.363 | 0.104 | 1.00026E-62 | KO | Dck         | 0.259  |
| Dusp16       | 3.7376E-67  | 1.85686175 | 0.218 | 0.036 | 1.16064E-62 | KO | Dusp16      | 0.182  |
| 9930111J21Ri | 3.75608E-67 | 1.88357941 | 0.2   | 0.03  | 1.16638E-62 | KO | 9930111J21f | 0.17   |
| Ppp1r9b      | 1.5332E-66  | 1.20994995 | 0.421 | 0.131 | 4.76104E-62 | KO | Ppp1r9b     | 0.29   |
| Themis2      | 2.31917E-66 | 1.4512829  | 0.327 | 0.084 | 7.20173E-62 | KO | Themis2     | 0.243  |
| Slfn5        | 2.92535E-66 | 1.22136802 | 0.423 | 0.134 | 9.0841E-62  | KO | Slfn5       | 0.289  |
| Plau         | 3.9031E-66  | 1.73427862 | 0.379 | 0.116 | 1.21203E-61 | KO | Plau        | 0.263  |
| Il7r         | 3.99467E-66 | 1.19002407 | 0.403 | 0.126 | 1.24046E-61 | KO | Il7r        | 0.277  |
| Dram1        | 4.11388E-66 | 1.81356148 | 0.299 | 0.072 | 1.27748E-61 | KO | Dram1       | 0.227  |
| Gbp8         | 4.52315E-66 | 2.19788865 | 0.24  | 0.047 | 1.40457E-61 | KO | Gbp8        | 0.193  |
| Hspa8        | 4.83758E-66 | 0.76115868 | 0.932 | 0.853 | 1.50221E-61 | KO | Hspa8       | 0.079  |
| Lbh          | 5.23772E-66 | 1.43124419 | 0.474 | 0.167 | 1.62647E-61 | KO | Lbh         | 0.307  |
| Dnajc3       | 7.40623E-66 | 1.0374657  | 0.534 | 0.202 | 2.29986E-61 | KO | Dnajc3      | 0.332  |
| Agtrap       | 8.24926E-66 | 1.57930625 | 0.394 | 0.12  | 2.56164E-61 | KO | Agtrap      | 0.274  |
| Txnrd1       | 1.30316E-65 | 1.59737026 | 0.451 | 0.158 | 4.04671E-61 | KO | Txnrd1      | 0.293  |
| Hnnpa2b1     | 1.40441E-65 | 1.04873093 | 0.834 | 0.516 | 4.3611E-61  | KO | Hnnpa2b1    | 0.318  |
| AB124611     | 1.76977E-65 | 1.14970712 | 0.577 | 0.245 | 5.49566E-61 | KO | AB124611    | 0.332  |
| Scpep1       | 2.36323E-65 | 1.14184036 | 0.555 | 0.218 | 7.33855E-61 | KO | Scpep1      | 0.337  |
| Plxnc1       | 2.67474E-65 | 1.86381819 | 0.24  | 0.046 | 8.30588E-61 | KO | Plxnc1      | 0.194  |
| Plekham1     | 3.55329E-65 | 1.73616691 | 0.243 | 0.047 | 1.1034E-60  | KO | Plekham1    | 0.196  |
| Arid5a       | 3.57673E-65 | 1.42450447 | 0.286 | 0.066 | 1.11068E-60 | KO | Arid5a      | 0.22   |
| Gbp6         | 4.6723E-65  | 2.2699957  | 0.155 | 0.016 | 1.45089E-60 | KO | Gbp6        | 0.139  |
| Trim30a      | 6.10013E-65 | 1.39113375 | 0.421 | 0.135 | 1.89427E-60 | KO | Trim30a     | 0.286  |
| Oasl2        | 6.19854E-65 | 1.08174889 | 0.364 | 0.102 | 1.92483E-60 | KO | Oasl2       | 0.262  |
| Gpcpd1       | 8.50631E-65 | 1.29452933 | 0.399 | 0.123 | 2.64146E-60 | KO | Gpcpd1      | 0.276  |
| Atp6v0d2     | 8.86237E-65 | 2.32635925 | 0.276 | 0.067 | 2.75203E-60 | KO | Atp6v0d2    | 0.209  |
| Etv6         | 1.12129E-64 | 1.43379697 | 0.323 | 0.084 | 3.48195E-60 | KO | Etv6        | 0.239  |
| Galnt7       | 1.90916E-64 | 1.43186559 | 0.397 | 0.123 | 5.92853E-60 | KO | Galnt7      | 0.274  |
| Runx1        | 2.27379E-64 | 1.14558217 | 0.582 | 0.242 | 7.06081E-60 | KO | Runx1       | 0.34   |
| Prr5l        | 2.29743E-64 | 2.05040087 | 0.159 | 0.017 | 7.1342E-60  | KO | Prr5l       | 0.142  |
| Tmem176a     | 2.56698E-64 | 2.14809564 | 0.298 | 0.077 | 7.97125E-60 | KO | Tmem176a    | 0.221  |
| Atf3         | 2.8151E-64  | 0.96193272 | 0.77  | 0.428 | 8.74174E-60 | KO | Atf3        | 0.342  |
| H2-M3        | 3.40137E-64 | 1.07514557 | 0.486 | 0.171 | 1.05623E-59 | KO | H2-M3       | 0.315  |
| Csf2rb2      | 3.96417E-64 | 1.0557333  | 0.358 | 0.098 | 1.23099E-59 | KO | Csf2rb2     | 0.26   |
| Ctsb         | 4.46485E-64 | 0.9307781  | 0.967 | 0.937 | 1.38647E-59 | KO | Ctsb        | 0.03   |
| Mycbp2       | 4.65883E-64 | 1.28435747 | 0.486 | 0.177 | 1.44671E-59 | KO | Mycbp2      | 0.309  |
| Sp100        | 9.4344E-64  | 1.21510209 | 0.474 | 0.168 | 2.92966E-59 | KO | Sp100       | 0.306  |
| Tmsb10       | 1.12017E-63 | 1.03277425 | 0.933 | 0.938 | 3.47847E-59 | KO | Tmsb10      | -0.005 |
| Cytip        | 1.87817E-63 | 1.59229643 | 0.461 | 0.168 | 5.83227E-59 | KO | Cytip       | 0.293  |
| Arap1        | 2.24979E-63 | 1.04980488 | 0.551 | 0.216 | 6.98626E-59 | KO | Arap1       | 0.335  |
| Irf2         | 2.53078E-63 | 1.01187254 | 0.477 | 0.167 | 7.85884E-59 | KO | Irf2        | 0.31   |
| St3gal4      | 3.20639E-63 | 1.61296202 | 0.262 | 0.057 | 9.9568E-59  | KO | St3gal4     | 0.205  |
| BC017643     | 3.61736E-63 | 1.33679736 | 0.318 | 0.081 | 1.1233E-58  | KO | BC017643    | 0.237  |
| Smap2        | 3.67362E-63 | 1.08017422 | 0.527 | 0.202 | 1.14077E-58 | KO | Smap2       | 0.325  |
| Specc1l      | 3.74973E-63 | 1.2478035  | 0.302 | 0.073 | 1.1644E-58  | KO | Specc1l     | 0.229  |

|            |             |            |       |       |             |    |            |       |
|------------|-------------|------------|-------|-------|-------------|----|------------|-------|
| Atf6       | 5.84333E-63 | 1.08708525 | 0.407 | 0.125 | 1.81453E-58 | KO | Atf6       | 0.282 |
| Smpd13a    | 6.27285E-63 | 1.16835689 | 0.63  | 0.311 | 1.94791E-58 | KO | Smpd13a    | 0.319 |
| Lamp1      | 9.42093E-63 | 0.74696974 | 0.905 | 0.796 | 2.92548E-58 | KO | Lamp1      | 0.109 |
| Bst1       | 2.30762E-62 | 1.13560994 | 0.379 | 0.113 | 7.16586E-58 | KO | Bst1       | 0.266 |
| Anxa4      | 2.94883E-62 | 1.18686169 | 0.678 | 0.356 | 9.15701E-58 | KO | Anxa4      | 0.322 |
| Tab2       | 4.33366E-62 | 1.10618745 | 0.535 | 0.205 | 1.34573E-57 | KO | Tab2       | 0.33  |
| Sppl2a     | 6.44518E-62 | 1.09558373 | 0.585 | 0.245 | 2.00142E-57 | KO | Sppl2a     | 0.34  |
| Ly6e       | 9.06952E-62 | 1.2256429  | 0.782 | 0.571 | 2.81636E-57 | KO | Ly6e       | 0.211 |
| Dhrs9      | 1.71733E-61 | 2.14809959 | 0.144 | 0.014 | 5.33282E-57 | KO | Dhrs9      | 0.13  |
| Snap23     | 1.72601E-61 | 1.03347002 | 0.501 | 0.18  | 5.35977E-57 | KO | Snap23     | 0.321 |
| Arhgap15   | 1.79091E-61 | 1.37449908 | 0.379 | 0.117 | 5.56131E-57 | KO | Arhgap15   | 0.262 |
| Gpalpp1    | 2.30545E-61 | 1.52757858 | 0.288 | 0.07  | 7.15912E-57 | KO | Gpalpp1    | 0.218 |
| Crybg1     | 2.9869E-61  | 1.57778513 | 0.298 | 0.076 | 9.27522E-57 | KO | Crybg1     | 0.222 |
| Mir155hg   | 3.05715E-61 | 3.41082584 | 0.088 | 0.001 | 9.49337E-57 | KO | Mir155hg   | 0.087 |
| Rassf4     | 3.47716E-61 | 1.29423563 | 0.534 | 0.22  | 1.07976E-56 | KO | Rassf4     | 0.314 |
| Tgm2       | 5.42249E-61 | 1.45309646 | 0.609 | 0.312 | 1.68385E-56 | KO | Tgm2       | 0.297 |
| Pigt       | 5.70376E-61 | 1.17377235 | 0.521 | 0.205 | 1.77119E-56 | KO | Pigt       | 0.316 |
| Arid4a     | 7.41562E-61 | 1.20408748 | 0.307 | 0.079 | 2.30277E-56 | KO | Arid4a     | 0.228 |
| Nlrc5      | 7.65939E-61 | 1.35021965 | 0.272 | 0.063 | 2.37847E-56 | KO | Nlrc5      | 0.209 |
| Fam174a    | 1.07074E-60 | 1.1209046  | 0.567 | 0.237 | 3.32497E-56 | KO | Fam174a    | 0.33  |
| Zcchc6     | 1.13522E-60 | 1.02916355 | 0.493 | 0.177 | 3.5252E-56  | KO | Zcchc6     | 0.316 |
| Sec24b     | 1.37147E-60 | 1.30655051 | 0.34  | 0.095 | 4.25882E-56 | KO | Sec24b     | 0.245 |
| Tns3       | 1.42251E-60 | 1.12605345 | 0.478 | 0.176 | 4.41732E-56 | KO | Tns3       | 0.302 |
| Tarm1      | 2.3858E-60  | 1.89153226 | 0.232 | 0.047 | 7.40863E-56 | KO | Tarm1      | 0.185 |
| Lsp1       | 3.35263E-60 | 1.17278171 | 0.53  | 0.215 | 1.04109E-55 | KO | Lsp1       | 0.315 |
| Cmklr1     | 3.51824E-60 | 1.27986851 | 0.377 | 0.115 | 1.09252E-55 | KO | Cmklr1     | 0.262 |
| Hivep1     | 3.53027E-60 | 1.6367581  | 0.264 | 0.061 | 1.09625E-55 | KO | Hivep1     | 0.203 |
| Irs2       | 5.50809E-60 | 1.23144584 | 0.308 | 0.082 | 1.71043E-55 | KO | Irs2       | 0.226 |
| Ezr        | 7.28874E-60 | 1.22256334 | 0.537 | 0.214 | 2.26337E-55 | KO | Ezr        | 0.323 |
| Rassf3     | 8.55414E-60 | 1.37493096 | 0.402 | 0.132 | 2.65632E-55 | KO | Rassf3     | 0.27  |
| Ogfr       | 8.64607E-60 | 1.16390308 | 0.391 | 0.12  | 2.68486E-55 | KO | Ogfr       | 0.271 |
| Ptpn6      | 1.37496E-59 | 1.10486878 | 0.673 | 0.347 | 4.26965E-55 | KO | Ptpn6      | 0.326 |
| AC160336.1 | 1.67834E-59 | 1.29234275 | 0.549 | 0.235 | 5.21174E-55 | KO | AC160336.1 | 0.314 |
| Cd86       | 1.71197E-59 | 1.06407195 | 0.431 | 0.147 | 5.31618E-55 | KO | Cd86       | 0.284 |
| Slc29a3    | 2.53638E-59 | 1.11965261 | 0.454 | 0.162 | 7.87623E-55 | KO | Slc29a3    | 0.292 |
| Pla2g7     | 2.8926E-59  | 1.14120149 | 0.672 | 0.359 | 8.98238E-55 | KO | Pla2g7     | 0.313 |
| Wars       | 3.98404E-59 | 1.53794762 | 0.33  | 0.095 | 1.23716E-54 | KO | Wars       | 0.235 |
| Rnf114     | 4.46885E-59 | 1.10516466 | 0.389 | 0.122 | 1.38771E-54 | KO | Rnf114     | 0.267 |
| Tob1       | 7.06912E-59 | 1.81621483 | 0.211 | 0.039 | 2.19517E-54 | KO | Tob1       | 0.172 |
| Ogdh       | 9.0636E-59  | 1.05702958 | 0.495 | 0.186 | 2.81452E-54 | KO | Ogdh       | 0.309 |
| Tnfsf9     | 1.00073E-58 | 2.71349209 | 0.227 | 0.048 | 3.10758E-54 | KO | Tnfsf9     | 0.179 |
| Il12rb1    | 1.08056E-58 | 2.1873197  | 0.159 | 0.02  | 3.35546E-54 | KO | Il12rb1    | 0.139 |
| Pbxip1     | 1.10158E-58 | 1.59660496 | 0.226 | 0.045 | 3.42075E-54 | KO | Pbxip1     | 0.181 |
| Ifih1      | 1.46019E-58 | 1.44385557 | 0.316 | 0.089 | 4.53432E-54 | KO | Ifih1      | 0.227 |
| Mia3       | 1.82194E-58 | 1.23717213 | 0.393 | 0.125 | 5.65768E-54 | KO | Mia3       | 0.268 |
| Irf9       | 2.07219E-58 | 1.31939382 | 0.31  | 0.083 | 6.43478E-54 | KO | Irf9       | 0.227 |
| Tmem176b   | 3.11774E-58 | 2.08115001 | 0.35  | 0.117 | 9.68153E-54 | KO | Tmem176b   | 0.233 |
| Edn1       | 3.58471E-58 | 3.56212701 | 0.154 | 0.02  | 1.11316E-53 | KO | Edn1       | 0.134 |
| Oxct1      | 3.65631E-58 | 0.97283235 | 0.64  | 0.311 | 1.13539E-53 | KO | Oxct1      | 0.329 |
| Ier3ip1    | 4.64212E-58 | 0.97409116 | 0.652 | 0.303 | 1.44152E-53 | KO | Ier3ip1    | 0.349 |
| Mat2a      | 6.92365E-58 | 1.00957361 | 0.47  | 0.174 | 2.15E-53    | KO | Mat2a      | 0.296 |
| Atp6v1e1   | 7.50957E-58 | 1.05681987 | 0.778 | 0.472 | 2.33195E-53 | KO | Atp6v1e1   | 0.306 |
| Rock2      | 7.9377E-58  | 0.93479984 | 0.474 | 0.172 | 2.46489E-53 | KO | Rock2      | 0.302 |
| Gm14085    | 1.1769E-57  | 3.23932407 | 0.076 | 0     | 3.65464E-53 | KO | Gm14085    | 0.076 |

|             |             |            |       |       |             |    |            |       |
|-------------|-------------|------------|-------|-------|-------------|----|------------|-------|
| Irf7        | 1.31151E-57 | 0.93468832 | 0.506 | 0.198 | 4.07263E-53 | KO | Irf7       | 0.308 |
| Sestd1      | 1.32748E-57 | 1.14463459 | 0.291 | 0.074 | 4.12224E-53 | KO | Sestd1     | 0.217 |
| Parp9       | 1.39289E-57 | 1.33667405 | 0.29  | 0.074 | 4.32533E-53 | KO | Parp9      | 0.216 |
| Pip4k2a     | 1.68969E-57 | 1.29529787 | 0.461 | 0.17  | 5.24699E-53 | KO | Pip4k2a    | 0.291 |
| Kat6a       | 2.30688E-57 | 1.49968311 | 0.228 | 0.047 | 7.16356E-53 | KO | Kat6a      | 0.181 |
| Tmem173     | 2.42139E-57 | 1.24175433 | 0.331 | 0.096 | 7.51915E-53 | KO | Tmem173    | 0.235 |
| Rsad2       | 2.98111E-57 | 1.29032704 | 0.445 | 0.17  | 9.25723E-53 | KO | Rsad2      | 0.275 |
| Hmga1b      | 3.11127E-57 | 2.48345749 | 0.083 | 0.001 | 9.66143E-53 | KO | Hmga1b     | 0.082 |
| Kdm7a       | 3.35374E-57 | 1.10746802 | 0.485 | 0.183 | 1.04144E-52 | KO | Kdm7a      | 0.302 |
| Trim12c     | 3.61992E-57 | 2.20632644 | 0.194 | 0.034 | 1.12409E-52 | KO | Trim12c    | 0.16  |
| Larp1       | 4.20937E-57 | 1.06712229 | 0.501 | 0.196 | 1.30714E-52 | KO | Larp1      | 0.305 |
| Asap1       | 4.31422E-57 | 1.29432543 | 0.328 | 0.094 | 1.33969E-52 | KO | Asap1      | 0.234 |
| Slc11a1     | 5.74497E-57 | 1.15685525 | 0.632 | 0.317 | 1.78399E-52 | KO | Slc11a1    | 0.315 |
| Nrg1        | 6.78662E-57 | 3.48287838 | 0.099 | 0.005 | 2.10745E-52 | KO | Nrg1       | 0.094 |
| Abl2        | 8.57302E-57 | 1.28820092 | 0.366 | 0.118 | 2.66218E-52 | KO | Abl2       | 0.248 |
| Ppp2r5a     | 1.0527E-56  | 0.98139035 | 0.498 | 0.189 | 3.26895E-52 | KO | Ppp2r5a    | 0.309 |
| Ccr1        | 1.12192E-56 | 0.97907364 | 0.642 | 0.306 | 3.4839E-52  | KO | Ccr1       | 0.336 |
| Ramp1       | 1.23743E-56 | 1.31122854 | 0.302 | 0.081 | 3.8426E-52  | KO | Ramp1      | 0.221 |
| Hexa        | 1.5742E-56  | 0.92960278 | 0.8   | 0.587 | 4.88836E-52 | KO | Hexa       | 0.213 |
| 2610507B11R | 1.73873E-56 | 1.16239571 | 0.395 | 0.133 | 5.39929E-52 | KO | 2610507B11 | 0.262 |
| Grk2        | 1.91898E-56 | 0.98454185 | 0.694 | 0.342 | 5.95901E-52 | KO | Grk2       | 0.352 |
| Vegfa       | 2.69985E-56 | 1.14914805 | 0.389 | 0.13  | 8.38383E-52 | KO | Vegfa      | 0.259 |
| Kpna4       | 3.39504E-56 | 1.03822837 | 0.453 | 0.166 | 1.05426E-51 | KO | Kpna4      | 0.287 |
| Mdm2        | 3.72212E-56 | 0.84869636 | 0.526 | 0.206 | 1.15583E-51 | KO | Mdm2       | 0.32  |
| Rela        | 3.83595E-56 | 1.17001562 | 0.378 | 0.121 | 1.19118E-51 | KO | Rela       | 0.257 |
| Phlpp1      | 4.00487E-56 | 1.86133899 | 0.182 | 0.03  | 1.24363E-51 | KO | Phlpp1     | 0.152 |
| Irak2       | 4.12122E-56 | 1.19025185 | 0.302 | 0.081 | 1.27976E-51 | KO | Irak2      | 0.221 |
| Aig1        | 4.3294E-56  | 1.13146544 | 0.332 | 0.097 | 1.34441E-51 | KO | Aig1       | 0.235 |
| Tmem51      | 5.24273E-56 | 1.18843899 | 0.256 | 0.06  | 1.62802E-51 | KO | Tmem51     | 0.196 |
| Dusp3       | 6.19436E-56 | 0.93980101 | 0.517 | 0.207 | 1.92354E-51 | KO | Dusp3      | 0.31  |
| Filip1l     | 6.53868E-56 | 1.58636555 | 0.24  | 0.054 | 2.03046E-51 | KO | Filip1l    | 0.186 |
| Tnrc18      | 6.65176E-56 | 1.03722934 | 0.298 | 0.079 | 2.06557E-51 | KO | Tnrc18     | 0.219 |
| BC028528    | 6.90125E-56 | 1.10676867 | 0.402 | 0.136 | 2.14304E-51 | KO | BC028528   | 0.266 |
| Midn        | 7.95913E-56 | 1.24121448 | 0.332 | 0.098 | 2.47155E-51 | KO | Midn       | 0.234 |
| Cd300ld     | 8.74486E-56 | 1.54395682 | 0.312 | 0.089 | 2.71554E-51 | KO | Cd300ld    | 0.223 |
| Mitf        | 9.61078E-56 | 1.20919934 | 0.331 | 0.097 | 2.98443E-51 | KO | Mitf       | 0.234 |
| Tmed5       | 1.27446E-55 | 1.04800252 | 0.553 | 0.232 | 3.95759E-51 | KO | Tmed5      | 0.321 |
| Fbxw11      | 1.42444E-55 | 1.18787355 | 0.334 | 0.099 | 4.42332E-51 | KO | Fbxw11     | 0.235 |
| Sidt2       | 1.4876E-55  | 1.06161536 | 0.381 | 0.122 | 4.61945E-51 | KO | Sidt2      | 0.259 |
| Tle3        | 1.85412E-55 | 1.30748418 | 0.397 | 0.135 | 5.75761E-51 | KO | Tle3       | 0.262 |
| Atp6v1b2    | 2.22761E-55 | 0.90726985 | 0.75  | 0.445 | 6.91741E-51 | KO | Atp6v1b2   | 0.305 |
| Ptpra       | 2.66936E-55 | 1.06071285 | 0.501 | 0.196 | 8.28918E-51 | KO | Ptpra      | 0.305 |
| Nampt       | 2.91798E-55 | 1.0726616  | 0.746 | 0.445 | 9.06119E-51 | KO | Nampt      | 0.301 |
| Sod1        | 3.11837E-55 | 1.09220938 | 0.615 | 0.282 | 9.68348E-51 | KO | Sod1       | 0.333 |
| Tmem30a     | 3.37809E-55 | 1.14238832 | 0.523 | 0.209 | 1.049E-50   | KO | Tmem30a    | 0.314 |
| Ifngr2      | 3.66185E-55 | 1.08381162 | 0.414 | 0.142 | 1.13712E-50 | KO | Ifngr2     | 0.272 |
| Stap1       | 3.90289E-55 | 1.94025006 | 0.218 | 0.046 | 1.21196E-50 | KO | Stap1      | 0.172 |
| Fam49a      | 4.82487E-55 | 1.49786306 | 0.324 | 0.095 | 1.49827E-50 | KO | Fam49a     | 0.229 |
| Cd274       | 4.83205E-55 | 0.98191867 | 0.526 | 0.22  | 1.5005E-50  | KO | Cd274      | 0.306 |
| Ifngr1      | 5.23117E-55 | 1.03874954 | 0.586 | 0.258 | 1.62444E-50 | KO | Ifngr1     | 0.328 |
| Lcp2        | 7.85986E-55 | 1.07139214 | 0.586 | 0.267 | 2.44072E-50 | KO | Lcp2       | 0.319 |
| Ccl3        | 8.58553E-55 | 1.5346002  | 0.539 | 0.25  | 2.66607E-50 | KO | Ccl3       | 0.289 |
| Ddx6        | 1.05969E-54 | 0.9300045  | 0.575 | 0.248 | 3.29065E-50 | KO | Ddx6       | 0.327 |
| Usp16       | 1.07259E-54 | 1.33597993 | 0.303 | 0.084 | 3.33072E-50 | KO | Usp16      | 0.219 |

|              |             |            |       |       |                |             |       |
|--------------|-------------|------------|-------|-------|----------------|-------------|-------|
| Rpl23a       | 1.13455E-54 | 0.75640666 | 0.896 | 0.71  | 3.52311E-50 KO | Rpl23a      | 0.186 |
| Cmtm3        | 1.36626E-54 | 0.99534562 | 0.45  | 0.165 | 4.24266E-50 KO | Cmtm3       | 0.285 |
| Gm2a         | 1.67577E-54 | 0.92244955 | 0.772 | 0.54  | 5.20377E-50 KO | Gm2a        | 0.232 |
| Pcmttd1      | 1.71211E-54 | 1.27941777 | 0.33  | 0.098 | 5.31662E-50 KO | Pcmttd1     | 0.232 |
| Zfp608       | 1.87883E-54 | 2.1037051  | 0.136 | 0.015 | 5.83434E-50 KO | Zfp608      | 0.121 |
| Dazap2       | 2.14054E-54 | 0.88647491 | 0.86  | 0.589 | 6.64703E-50 KO | Dazap2      | 0.271 |
| Itgb2        | 3.01401E-54 | 0.92045728 | 0.681 | 0.359 | 9.3594E-50 KO  | Itgb2       | 0.322 |
| Evi2a        | 3.20352E-54 | 1.11054305 | 0.519 | 0.214 | 9.94789E-50 KO | Evi2a       | 0.305 |
| Aplp2        | 3.2602E-54  | 1.19821901 | 0.577 | 0.271 | 1.01239E-49 KO | Aplp2       | 0.306 |
| Dock8        | 3.6861E-54  | 1.46862993 | 0.274 | 0.071 | 1.14465E-49 KO | Dock8       | 0.203 |
| Cxcl16       | 4.13464E-54 | 1.20606321 | 0.726 | 0.508 | 1.28393E-49 KO | Cxcl16      | 0.218 |
| Cdc42se2     | 4.53584E-54 | 0.98400118 | 0.486 | 0.186 | 1.40851E-49 KO | Cdc42se2    | 0.3   |
| Cfb          | 5.10754E-54 | 1.99784314 | 0.144 | 0.018 | 1.58604E-49 KO | Cfb         | 0.126 |
| M6pr         | 7.5313E-54  | 0.93844936 | 0.724 | 0.402 | 2.3387E-49 KO  | M6pr        | 0.322 |
| Myo9b        | 9.0877E-54  | 0.88781202 | 0.49  | 0.19  | 2.822E-49 KO   | Myo9b       | 0.3   |
| Srpr         | 1.14063E-53 | 1.12200352 | 0.354 | 0.111 | 3.54199E-49 KO | Srpr        | 0.243 |
| Hspa1b       | 1.18237E-53 | 1.83521642 | 0.419 | 0.16  | 3.6716E-49 KO  | Hspa1b      | 0.259 |
| Syk          | 1.38671E-53 | 0.83400567 | 0.615 | 0.271 | 4.30616E-49 KO | Syk         | 0.344 |
| H2-Q4        | 1.44031E-53 | 0.93009892 | 0.409 | 0.142 | 4.4726E-49 KO  | H2-Q4       | 0.267 |
| Tbc1d9       | 1.45943E-53 | 1.04330809 | 0.286 | 0.076 | 4.53196E-49 KO | Tbc1d9      | 0.21  |
| Clint1       | 1.58703E-53 | 1.07745853 | 0.458 | 0.172 | 4.92821E-49 KO | Clint1      | 0.286 |
| Zdhhc9       | 1.76519E-53 | 1.19711495 | 0.252 | 0.061 | 5.48145E-49 KO | Zdhhc9      | 0.191 |
| Spty2d1      | 1.97567E-53 | 0.99022982 | 0.3   | 0.083 | 6.13506E-49 KO | Spty2d1     | 0.217 |
| Ear2         | 2.58244E-53 | 4.09734369 | 0.131 | 0.015 | 8.01925E-49 KO | Ear2        | 0.116 |
| Hspa1a       | 4.13577E-53 | 1.42849324 | 0.514 | 0.223 | 1.28428E-48 KO | Hspa1a      | 0.291 |
| Eloa         | 4.5519E-53  | 1.19704907 | 0.308 | 0.087 | 1.4135E-48 KO  | Eloa        | 0.221 |
| Nup98        | 5.68267E-53 | 1.17326759 | 0.342 | 0.107 | 1.76464E-48 KO | Nup98       | 0.235 |
| Zfp263       | 7.8167E-53  | 1.37422135 | 0.262 | 0.067 | 2.42732E-48 KO | Zfp263      | 0.195 |
| Map3k1       | 8.06009E-53 | 1.0436481  | 0.403 | 0.139 | 2.5029E-48 KO  | Map3k1      | 0.264 |
| Arfgef1      | 1.0618E-52  | 0.87199638 | 0.382 | 0.126 | 3.2972E-48 KO  | Arfgef1     | 0.256 |
| Chd1         | 1.38677E-52 | 0.97793119 | 0.262 | 0.066 | 4.30634E-48 KO | Chd1        | 0.196 |
| Mindy1       | 1.5252E-52  | 1.227662   | 0.368 | 0.123 | 4.7362E-48 KO  | Mindy1      | 0.245 |
| Fuca1        | 1.62983E-52 | 0.90454353 | 0.701 | 0.404 | 5.0611E-48 KO  | Fuca1       | 0.297 |
| Usp12        | 1.65829E-52 | 0.99887047 | 0.244 | 0.058 | 5.1495E-48 KO  | Usp12       | 0.186 |
| D17Wsu92e    | 1.95871E-52 | 0.96969851 | 0.511 | 0.206 | 6.08239E-48 KO | D17Wsu92e   | 0.305 |
| Mthfsl       | 2.90259E-52 | 1.00184047 | 0.292 | 0.08  | 9.01341E-48 KO | Mthfsl      | 0.212 |
| Pira2        | 3.02735E-52 | 1.17635884 | 0.31  | 0.091 | 9.40085E-48 KO | Pira2       | 0.219 |
| Lfng         | 5.85965E-52 | 1.74845993 | 0.288 | 0.083 | 1.8196E-47 KO  | Lfng        | 0.205 |
| Arf2         | 7.58978E-52 | 1.26404708 | 0.352 | 0.115 | 2.35686E-47 KO | Arf2        | 0.237 |
| Vps4b        | 7.8572E-52  | 1.03526187 | 0.461 | 0.175 | 2.4399E-47 KO  | Vps4b       | 0.286 |
| P2rx4        | 9.96498E-52 | 0.91531639 | 0.561 | 0.253 | 3.09442E-47 KO | P2rx4       | 0.308 |
| Stag2        | 1.02286E-51 | 1.00355321 | 0.389 | 0.131 | 3.17629E-47 KO | Stag2       | 0.258 |
| Taok3        | 1.04744E-51 | 0.95138326 | 0.455 | 0.173 | 3.25262E-47 KO | Taok3       | 0.282 |
| Ndufa1       | 1.1286E-51  | 0.88977968 | 0.708 | 0.43  | 3.50465E-47 KO | Ndufa1      | 0.278 |
| Itpkb        | 1.16836E-51 | 0.9785656  | 0.538 | 0.232 | 3.62811E-47 KO | Itpkb       | 0.306 |
| Parp14       | 1.22211E-51 | 1.10340745 | 0.398 | 0.141 | 3.79501E-47 KO | Parp14      | 0.257 |
| Nadk         | 1.35512E-51 | 1.06403816 | 0.394 | 0.137 | 4.20804E-47 KO | Nadk        | 0.257 |
| Fyb          | 2.162E-51   | 1.0274699  | 0.717 | 0.415 | 6.71366E-47 KO | Fyb         | 0.302 |
| Arid5b       | 2.46813E-51 | 0.78983221 | 0.368 | 0.12  | 7.66429E-47 KO | Arid5b      | 0.248 |
| Oas3         | 2.46972E-51 | 1.35977913 | 0.198 | 0.039 | 7.66922E-47 KO | Oas3        | 0.159 |
| Etf1         | 2.61905E-51 | 0.89548837 | 0.602 | 0.284 | 8.13293E-47 KO | Etf1        | 0.318 |
| Serpine1     | 3.20439E-51 | 2.57586742 | 0.203 | 0.044 | 9.9506E-47 KO  | Serpine1    | 0.159 |
| Gbp9         | 4.79361E-51 | 1.24759895 | 0.208 | 0.044 | 1.48856E-46 KO | Gbp9        | 0.164 |
| 9030624J02Ri | 4.94123E-51 | 1.00907491 | 0.403 | 0.142 | 1.5344E-46 KO  | 9030624J02F | 0.261 |

|          |             |            |       |       |             |    |          |       |
|----------|-------------|------------|-------|-------|-------------|----|----------|-------|
| Clcf1    | 5.1914E-51  | 2.79788325 | 0.111 | 0.01  | 1.61209E-46 | KO | Clcf1    | 0.101 |
| Notch2   | 5.22752E-51 | 1.01126846 | 0.323 | 0.099 | 1.6233E-46  | KO | Notch2   | 0.224 |
| Fem1c    | 7.44382E-51 | 0.80151128 | 0.397 | 0.139 | 2.31153E-46 | KO | Fem1c    | 0.258 |
| Cd300lb  | 7.81416E-51 | 1.13508278 | 0.242 | 0.058 | 2.42653E-46 | KO | Cd300lb  | 0.184 |
| Tnpo3    | 8.4126E-51  | 0.81403252 | 0.36  | 0.116 | 2.61237E-46 | KO | Tnpo3    | 0.244 |
| Plekhb2  | 8.66199E-51 | 1.0044714  | 0.483 | 0.194 | 2.68981E-46 | KO | Plekhb2  | 0.289 |
| Gab2     | 1.01691E-50 | 1.10031102 | 0.335 | 0.105 | 3.15781E-46 | KO | Gab2     | 0.23  |
| Chd4     | 1.53858E-50 | 0.94126755 | 0.557 | 0.248 | 4.77776E-46 | KO | Chd4     | 0.309 |
| Litaf    | 1.58878E-50 | 0.77915442 | 0.802 | 0.546 | 4.93363E-46 | KO | Litaf    | 0.256 |
| Enc1     | 1.65247E-50 | 2.64205785 | 0.097 | 0.006 | 5.13142E-46 | KO | Enc1     | 0.091 |
| Paf1     | 1.67963E-50 | 1.46628653 | 0.311 | 0.095 | 5.21576E-46 | KO | Paf1     | 0.216 |
| Arl5b    | 1.84666E-50 | 1.40587171 | 0.214 | 0.047 | 5.73444E-46 | KO | Arl5b    | 0.167 |
| Trpc4ap  | 1.86865E-50 | 0.81287805 | 0.437 | 0.16  | 5.80271E-46 | KO | Trpc4ap  | 0.277 |
| Hsp90b1  | 2.14853E-50 | 0.79586593 | 0.899 | 0.692 | 6.67182E-46 | KO | Hsp90b1  | 0.207 |
| Zfp361l  | 2.40799E-50 | 1.21318784 | 0.688 | 0.411 | 7.47752E-46 | KO | Zfp361l  | 0.277 |
| Camk1d   | 3.61562E-50 | 1.14110972 | 0.304 | 0.091 | 1.12276E-45 | KO | Camk1d   | 0.213 |
| Anxa7    | 4.54001E-50 | 0.88548159 | 0.479 | 0.189 | 1.40981E-45 | KO | Anxa7    | 0.29  |
| Ezh1     | 6.38622E-50 | 1.39396258 | 0.204 | 0.043 | 1.98311E-45 | KO | Ezh1     | 0.161 |
| Rp2      | 7.27674E-50 | 1.39036459 | 0.314 | 0.098 | 2.25965E-45 | KO | Rp2      | 0.216 |
| Lap3     | 9.08214E-50 | 1.29712511 | 0.497 | 0.222 | 2.82028E-45 | KO | Lap3     | 0.275 |
| Bloc1s1  | 9.59495E-50 | 0.84845797 | 0.248 | 0.061 | 2.97952E-45 | KO | Bloc1s1  | 0.187 |
| Dock2    | 1.16168E-49 | 0.8347661  | 0.539 | 0.229 | 3.60736E-45 | KO | Dock2    | 0.31  |
| Crtc2    | 1.26225E-49 | 1.1304125  | 0.191 | 0.038 | 3.91968E-45 | KO | Crtc2    | 0.153 |
| Ighm     | 1.30486E-49 | 1.8649668  | 0.232 | 0.059 | 4.05199E-45 | KO | Ighm     | 0.173 |
| P2ry10b  | 1.354E-49   | 1.80738668 | 0.195 | 0.04  | 4.20457E-45 | KO | P2ry10b  | 0.155 |
| Rab8b    | 1.70049E-49 | 0.91765032 | 0.698 | 0.374 | 5.28052E-45 | KO | Rab8b    | 0.324 |
| Cep350   | 1.70446E-49 | 1.18522193 | 0.283 | 0.08  | 5.29287E-45 | KO | Cep350   | 0.203 |
| Ik       | 2.35183E-49 | 0.81077958 | 0.513 | 0.21  | 7.30313E-45 | KO | Ik       | 0.303 |
| Dusp18   | 2.38529E-49 | 2.66878614 | 0.091 | 0.005 | 7.40704E-45 | KO | Dusp18   | 0.086 |
| Grcc10   | 2.55016E-49 | 0.92026218 | 0.302 | 0.087 | 7.91902E-45 | KO | Grcc10   | 0.215 |
| Ralb     | 2.73473E-49 | 0.80442609 | 0.499 | 0.204 | 8.49216E-45 | KO | Ralb     | 0.295 |
| Ctdsp1   | 2.79338E-49 | 1.22045728 | 0.28  | 0.078 | 8.67427E-45 | KO | Ctdsp1   | 0.202 |
| Stx4a    | 2.85698E-49 | 0.82521909 | 0.622 | 0.296 | 8.87179E-45 | KO | Stx4a    | 0.326 |
| Zc3hav1  | 2.94012E-49 | 0.98528659 | 0.439 | 0.168 | 9.12996E-45 | KO | Zc3hav1  | 0.271 |
| Tifab    | 3.17651E-49 | 1.25187589 | 0.266 | 0.072 | 9.86401E-45 | KO | Tifab    | 0.194 |
| Cdk11b   | 3.41822E-49 | 1.16041422 | 0.414 | 0.151 | 1.06146E-44 | KO | Cdk11b   | 0.263 |
| Adgrg5   | 3.78775E-49 | 3.02524765 | 0.073 | 0.002 | 1.17621E-44 | KO | Adgrg5   | 0.071 |
| Capn1    | 3.99199E-49 | 0.9640166  | 0.347 | 0.113 | 1.23963E-44 | KO | Capn1    | 0.234 |
| Ugcg     | 5.30325E-49 | 0.95502227 | 0.366 | 0.126 | 1.64682E-44 | KO | Ugcg     | 0.24  |
| Lrch4    | 5.47642E-49 | 1.87305995 | 0.146 | 0.021 | 1.70059E-44 | KO | Lrch4    | 0.125 |
| Sdf2     | 5.53691E-49 | 1.01046443 | 0.379 | 0.131 | 1.71938E-44 | KO | Sdf2     | 0.248 |
| Anxa6    | 5.8437E-49  | 0.89972421 | 0.413 | 0.15  | 1.81464E-44 | KO | Anxa6    | 0.263 |
| AU020206 | 6.13723E-49 | 1.00236423 | 0.383 | 0.137 | 1.90579E-44 | KO | AU020206 | 0.246 |
| Ptpn1    | 7.50536E-49 | 0.95878233 | 0.681 | 0.377 | 2.33064E-44 | KO | Ptpn1    | 0.304 |
| Hpse     | 7.93993E-49 | 0.89981224 | 0.359 | 0.12  | 2.46559E-44 | KO | Hpse     | 0.239 |
| Jarid2   | 9.14687E-49 | 0.86217691 | 0.43  | 0.16  | 2.84038E-44 | KO | Jarid2   | 0.27  |
| Ddhd1    | 9.40571E-49 | 1.20178615 | 0.358 | 0.122 | 2.92076E-44 | KO | Ddhd1    | 0.236 |
| Rbms1    | 1.062E-48   | 0.78621869 | 0.772 | 0.478 | 3.29783E-44 | KO | Rbms1    | 0.294 |
| Zcchc2   | 1.13456E-48 | 0.88167505 | 0.258 | 0.067 | 3.52315E-44 | KO | Zcchc2   | 0.191 |
| Mcur1    | 1.1553E-48  | 1.16262671 | 0.375 | 0.129 | 3.58756E-44 | KO | Mcur1    | 0.246 |
| Flrt3    | 1.42944E-48 | 4.19643432 | 0.08  | 0.003 | 4.43883E-44 | KO | Flrt3    | 0.077 |
| Dse      | 1.45786E-48 | 1.17970561 | 0.401 | 0.151 | 4.52709E-44 | KO | Dse      | 0.25  |
| Myof     | 1.58163E-48 | 0.93230696 | 0.491 | 0.213 | 4.91145E-44 | KO | Myof     | 0.278 |
| Tmem106a | 1.59691E-48 | 0.89886465 | 0.662 | 0.355 | 4.95889E-44 | KO | Tmem106a | 0.307 |

|           |             |            |       |       |             |    |           |       |
|-----------|-------------|------------|-------|-------|-------------|----|-----------|-------|
| Bcl2l11   | 1.68319E-48 | 1.1371878  | 0.406 | 0.152 | 5.22681E-44 | KO | Bcl2l11   | 0.254 |
| Prrc2c    | 2.00173E-48 | 0.81934667 | 0.558 | 0.246 | 6.21598E-44 | KO | Prrc2c    | 0.312 |
| Pea15a    | 2.16479E-48 | 0.99634945 | 0.406 | 0.147 | 6.72233E-44 | KO | Pea15a    | 0.259 |
| Gch1      | 2.26022E-48 | 0.95271277 | 0.331 | 0.106 | 7.01866E-44 | KO | Gch1      | 0.225 |
| Macf1     | 2.38539E-48 | 0.88864307 | 0.473 | 0.189 | 7.40734E-44 | KO | Macf1     | 0.284 |
| Dnmt3a    | 2.46694E-48 | 1.24095207 | 0.371 | 0.133 | 7.66059E-44 | KO | Dnmt3a    | 0.238 |
| Arih2     | 2.53282E-48 | 0.87611046 | 0.332 | 0.105 | 7.86518E-44 | KO | Arih2     | 0.227 |
| Xbp1      | 3.23158E-48 | 0.99572681 | 0.602 | 0.292 | 1.0035E-43  | KO | Xbp1      | 0.31  |
| Ptp4a2    | 4.07594E-48 | 0.79879557 | 0.81  | 0.535 | 1.2657E-43  | KO | Ptp4a2    | 0.275 |
| Rcbtb2    | 6.51864E-48 | 0.99129857 | 0.446 | 0.178 | 2.02423E-43 | KO | Rcbtb2    | 0.268 |
| Tpr       | 7.17533E-48 | 0.85772863 | 0.609 | 0.292 | 2.22815E-43 | KO | Tpr       | 0.317 |
| Hexb      | 7.56234E-48 | 1.25457649 | 0.677 | 0.412 | 2.34833E-43 | KO | Hexb      | 0.265 |
| Mmp14     | 8.2193E-48  | 1.17559645 | 0.473 | 0.203 | 2.55234E-43 | KO | Mmp14     | 0.27  |
| Cpq       | 8.81988E-48 | 1.15950653 | 0.263 | 0.072 | 2.73884E-43 | KO | Cpq       | 0.191 |
| Slco3a1   | 1.01092E-47 | 1.95189525 | 0.195 | 0.042 | 3.1392E-43  | KO | Slco3a1   | 0.153 |
| Ncoa7     | 1.06838E-47 | 1.57807308 | 0.232 | 0.059 | 3.31765E-43 | KO | Ncoa7     | 0.173 |
| Tfe3      | 1.10851E-47 | 1.00577117 | 0.352 | 0.119 | 3.44225E-43 | KO | Tfe3      | 0.233 |
| Crebbp    | 1.18209E-47 | 0.84733394 | 0.344 | 0.113 | 3.67073E-43 | KO | Crebbp    | 0.231 |
| Tspan13   | 1.27727E-47 | 1.31738301 | 0.192 | 0.04  | 3.9663E-43  | KO | Tspan13   | 0.152 |
| Hopx      | 1.48492E-47 | 1.2329806  | 0.178 | 0.034 | 4.61113E-43 | KO | Hopx      | 0.144 |
| Tnfsf12   | 1.58553E-47 | 0.91387121 | 0.442 | 0.173 | 4.92353E-43 | KO | Tnfsf12   | 0.269 |
| Aff1      | 2.03882E-47 | 0.78583421 | 0.315 | 0.098 | 6.33114E-43 | KO | Aff1      | 0.217 |
| Rasa4     | 2.57341E-47 | 0.7841064  | 0.494 | 0.199 | 7.9912E-43  | KO | Rasa4     | 0.295 |
| Spop      | 2.99355E-47 | 0.97230439 | 0.538 | 0.236 | 9.29586E-43 | KO | Spop      | 0.302 |
| Pla2g15   | 3.99897E-47 | 1.08759194 | 0.366 | 0.132 | 1.2418E-42  | KO | Pla2g15   | 0.234 |
| Tep1      | 4.90806E-47 | 0.98338687 | 0.47  | 0.192 | 1.5241E-42  | KO | Tep1      | 0.278 |
| Tpm3      | 5.07822E-47 | 0.77319819 | 0.801 | 0.537 | 1.57694E-42 | KO | Tpm3      | 0.264 |
| Daxx      | 5.37187E-47 | 1.10970724 | 0.238 | 0.061 | 1.66813E-42 | KO | Daxx      | 0.177 |
| Jak1      | 5.48681E-47 | 0.81423897 | 0.55  | 0.246 | 1.70382E-42 | KO | Jak1      | 0.304 |
| Bcl2a1a   | 5.77577E-47 | 1.40136942 | 0.363 | 0.136 | 1.79355E-42 | KO | Bcl2a1a   | 0.227 |
| Lmo4      | 6.07919E-47 | 1.60191457 | 0.395 | 0.153 | 1.88777E-42 | KO | Lmo4      | 0.242 |
| Man1a     | 8.04659E-47 | 1.20488814 | 0.39  | 0.146 | 2.49871E-42 | KO | Man1a     | 0.244 |
| Trp53inp2 | 8.23418E-47 | 0.96394419 | 0.232 | 0.058 | 2.55696E-42 | KO | Trp53inp2 | 0.174 |
| Zfp384    | 8.35866E-47 | 1.43058487 | 0.19  | 0.04  | 2.59561E-42 | KO | Zfp384    | 0.15  |
| Gm21188   | 1.00376E-46 | 0.92904972 | 0.383 | 0.137 | 3.11699E-42 | KO | Gm21188   | 0.246 |
| Snx20     | 1.0437E-46  | 1.01516398 | 0.429 | 0.169 | 3.24101E-42 | KO | Snx20     | 0.26  |
| Dhrs3     | 1.09363E-46 | 1.01651916 | 0.566 | 0.273 | 3.39604E-42 | KO | Dhrs3     | 0.293 |
| Ttyh3     | 1.11395E-46 | 0.78397245 | 0.409 | 0.15  | 3.45914E-42 | KO | Ttyh3     | 0.259 |
| Cerk      | 1.2086E-46  | 0.86465305 | 0.497 | 0.211 | 3.75308E-42 | KO | Cerk      | 0.286 |
| Rnasel    | 1.25921E-46 | 1.2941018  | 0.303 | 0.097 | 3.91023E-42 | KO | Rnasel    | 0.206 |
| Ttc7      | 1.30582E-46 | 0.96977097 | 0.334 | 0.109 | 4.05496E-42 | KO | Ttc7      | 0.225 |
| Prr13     | 1.4362E-46  | 0.97515954 | 0.59  | 0.287 | 4.45984E-42 | KO | Prr13     | 0.303 |
| Arl13b    | 2.25418E-46 | 1.49661572 | 0.155 | 0.027 | 6.99989E-42 | KO | Arl13b    | 0.128 |
| Epsti1    | 2.5752E-46  | 0.95743059 | 0.502 | 0.216 | 7.99678E-42 | KO | Epsti1    | 0.286 |
| Fgd4      | 2.64335E-46 | 1.02627077 | 0.356 | 0.124 | 8.20839E-42 | KO | Fgd4      | 0.232 |
| Hnrrnph2  | 2.68072E-46 | 0.89737067 | 0.525 | 0.23  | 8.32445E-42 | KO | Hnrrnph2  | 0.295 |
| Dgat1     | 3.15887E-46 | 1.7023047  | 0.234 | 0.061 | 9.80925E-42 | KO | Dgat1     | 0.173 |
| Znfx1     | 3.93447E-46 | 1.08775969 | 0.271 | 0.078 | 1.22177E-41 | KO | Znfx1     | 0.193 |
| Lst1      | 4.43233E-46 | 1.10968307 | 0.7   | 0.457 | 1.37637E-41 | KO | Lst1      | 0.243 |
| Sik1      | 4.48221E-46 | 0.98914709 | 0.334 | 0.111 | 1.39186E-41 | KO | Sik1      | 0.223 |
| Igf1      | 8.14551E-46 | 1.63306449 | 0.393 | 0.167 | 2.52943E-41 | KO | Igf1      | 0.226 |
| Tmem184b  | 8.49949E-46 | 1.09403108 | 0.202 | 0.045 | 2.63935E-41 | KO | Tmem184b  | 0.157 |
| Cyp4v3    | 8.5969E-46  | 1.11896887 | 0.247 | 0.066 | 2.6696E-41  | KO | Cyp4v3    | 0.181 |
| Furin     | 9.6856E-46  | 1.08135515 | 0.686 | 0.39  | 3.00767E-41 | KO | Furin     | 0.296 |

|            |             |            |       |       |                |            |       |
|------------|-------------|------------|-------|-------|----------------|------------|-------|
| Lamp2      | 1.04094E-45 | 0.75707558 | 0.809 | 0.545 | 3.23242E-41 KO | Lamp2      | 0.264 |
| Gpr171     | 1.11759E-45 | 2.23397106 | 0.13  | 0.018 | 3.47046E-41 KO | Gpr171     | 0.112 |
| Ripk2      | 1.11892E-45 | 1.24020263 | 0.18  | 0.037 | 3.47459E-41 KO | Ripk2      | 0.143 |
| Azin1      | 1.16515E-45 | 0.78446391 | 0.561 | 0.26  | 3.61813E-41 KO | Azin1      | 0.301 |
| BC005537   | 1.46069E-45 | 0.84049627 | 0.884 | 0.629 | 4.53587E-41 KO | BC005537   | 0.255 |
| Atp1a1     | 2.94923E-45 | 0.854648   | 0.784 | 0.469 | 9.15824E-41 KO | Atp1a1     | 0.315 |
| Slc28a2    | 3.02252E-45 | 1.01406552 | 0.266 | 0.077 | 9.38584E-41 KO | Slc28a2    | 0.189 |
| Cd180      | 3.0697E-45  | 1.05390536 | 0.411 | 0.164 | 9.53235E-41 KO | Cd180      | 0.247 |
| Parp8      | 3.42759E-45 | 1.77817837 | 0.194 | 0.043 | 1.06437E-40 KO | Parp8      | 0.151 |
| Bcl10      | 3.60364E-45 | 0.91262519 | 0.401 | 0.151 | 1.11904E-40 KO | Bcl10      | 0.25  |
| Synj1      | 3.65979E-45 | 1.07040658 | 0.426 | 0.168 | 1.13647E-40 KO | Synj1      | 0.258 |
| Vdr        | 3.76904E-45 | 1.83933923 | 0.131 | 0.019 | 1.1704E-40 KO  | Vdr        | 0.112 |
| Parp11     | 4.03325E-45 | 1.5109991  | 0.142 | 0.022 | 1.25244E-40 KO | Parp11     | 0.12  |
| AL590144.2 | 4.61817E-45 | 2.19091219 | 0.104 | 0.01  | 1.43408E-40 KO | AL590144.2 | 0.094 |
| Slc35b2    | 5.61161E-45 | 1.27170378 | 0.328 | 0.111 | 1.74257E-40 KO | Slc35b2    | 0.217 |
| Gm4951     | 7.65056E-45 | 1.90521748 | 0.18  | 0.038 | 2.37573E-40 KO | Gm4951     | 0.142 |
| Itgax      | 7.95002E-45 | 1.48867868 | 0.27  | 0.083 | 2.46872E-40 KO | Itgax      | 0.187 |
| Bnip2      | 8.8537E-45  | 0.95798011 | 0.526 | 0.236 | 2.74934E-40 KO | Bnip2      | 0.29  |
| Gsdmd      | 9.10806E-45 | 0.79448477 | 0.338 | 0.113 | 2.82833E-40 KO | Gsdmd      | 0.225 |
| Ms4a8a     | 1.27744E-44 | 1.44811978 | 0.196 | 0.045 | 3.96683E-40 KO | Ms4a8a     | 0.151 |
| Sord       | 1.311E-44   | 1.25288433 | 0.188 | 0.041 | 4.07104E-40 KO | Sord       | 0.147 |
| Scarf1     | 1.47887E-44 | 1.21750332 | 0.18  | 0.038 | 4.59233E-40 KO | Scarf1     | 0.142 |
| Relb       | 1.53618E-44 | 1.32930848 | 0.183 | 0.039 | 4.7703E-40 KO  | Relb       | 0.144 |
| Atxn7l3b   | 1.59515E-44 | 0.74320972 | 0.463 | 0.186 | 4.95343E-40 KO | Atxn7l3b   | 0.277 |
| Hacd4      | 1.67407E-44 | 0.95195659 | 0.415 | 0.165 | 5.1985E-40 KO  | Hacd4      | 0.25  |
| Ikbke      | 1.67842E-44 | 0.95760572 | 0.28  | 0.085 | 5.21198E-40 KO | Ikbke      | 0.195 |
| Iqgap2     | 1.84437E-44 | 1.24699867 | 0.307 | 0.102 | 5.72734E-40 KO | Iqgap2     | 0.205 |
| Dync1h1    | 2.32742E-44 | 0.72852815 | 0.566 | 0.256 | 7.22732E-40 KO | Dync1h1    | 0.31  |
| Cebpa      | 2.53869E-44 | 0.97780672 | 0.466 | 0.2   | 7.8834E-40 KO  | Cebpa      | 0.266 |
| Notch1     | 3.05298E-44 | 1.07713793 | 0.252 | 0.071 | 9.48041E-40 KO | Notch1     | 0.181 |
| Fam129a    | 3.25579E-44 | 1.45912928 | 0.216 | 0.055 | 1.01102E-39 KO | Fam129a    | 0.161 |
| Peli1      | 3.27617E-44 | 0.78188903 | 0.421 | 0.166 | 1.01735E-39 KO | Peli1      | 0.255 |
| Ccl2       | 3.72754E-44 | 1.38175101 | 0.765 | 0.58  | 1.15751E-39 KO | Ccl2       | 0.185 |
| Cd209d     | 4.30145E-44 | 5.35306008 | 0.061 | 0.001 | 1.33573E-39 KO | Cd209d     | 0.06  |
| Tor1aip1   | 4.66458E-44 | 0.74141851 | 0.561 | 0.256 | 1.44849E-39 KO | Tor1aip1   | 0.305 |
| Sf1        | 4.92775E-44 | 0.85922635 | 0.577 | 0.267 | 1.53021E-39 KO | Sf1        | 0.31  |
| Tollip     | 5.34903E-44 | 0.80049643 | 0.346 | 0.12  | 1.66103E-39 KO | Tollip     | 0.226 |
| Adap1      | 5.94695E-44 | 1.07987515 | 0.282 | 0.086 | 1.84671E-39 KO | Adap1      | 0.196 |
| Leng8      | 6.4196E-44  | 0.85063624 | 0.314 | 0.102 | 1.99348E-39 KO | Leng8      | 0.212 |
| Ccnl1      | 6.50939E-44 | 0.75133709 | 0.685 | 0.361 | 2.02136E-39 KO | Ccnl1      | 0.324 |
| Mgat1      | 7.34739E-44 | 0.90247908 | 0.425 | 0.17  | 2.28159E-39 KO | Mgat1      | 0.255 |
| Khdrbs1    | 7.92426E-44 | 0.96338028 | 0.529 | 0.241 | 2.46072E-39 KO | Khdrbs1    | 0.288 |
| Rnf130     | 8.70654E-44 | 0.80263952 | 0.682 | 0.384 | 2.70364E-39 KO | Rnf130     | 0.298 |
| Supt5      | 1.08375E-43 | 1.00597853 | 0.421 | 0.166 | 3.36536E-39 KO | Supt5      | 0.255 |
| Aagab      | 1.22008E-43 | 1.16822152 | 0.224 | 0.058 | 3.78871E-39 KO | Aagab      | 0.166 |
| F7         | 1.68162E-43 | 1.18545025 | 0.279 | 0.088 | 5.22195E-39 KO | F7         | 0.191 |
| Stra6l     | 2.01091E-43 | 1.33198204 | 0.092 | 0.008 | 6.24448E-39 KO | Stra6l     | 0.084 |
| Pnpla7     | 2.04157E-43 | 0.89202534 | 0.276 | 0.083 | 6.3397E-39 KO  | Pnpla7     | 0.193 |
| Atp1a3     | 2.27077E-43 | 1.04291126 | 0.199 | 0.047 | 7.05142E-39 KO | Atp1a3     | 0.152 |
| Usp8       | 2.52108E-43 | 0.92503769 | 0.415 | 0.162 | 7.82871E-39 KO | Usp8       | 0.253 |
| Ptprj      | 2.60041E-43 | 0.90535725 | 0.513 | 0.229 | 8.07506E-39 KO | Ptprj      | 0.284 |
| Lpl        | 2.61907E-43 | 1.25484682 | 0.662 | 0.41  | 8.133E-39 KO   | Lpl        | 0.252 |
| B3gnt5     | 3.23964E-43 | 2.54684912 | 0.104 | 0.011 | 1.006E-38 KO   | B3gnt5     | 0.093 |
| Alas1      | 3.2868E-43  | 1.26754644 | 0.331 | 0.117 | 1.02065E-38 KO | Alas1      | 0.214 |

|             |             |            |       |       |             |    |            |       |
|-------------|-------------|------------|-------|-------|-------------|----|------------|-------|
| Lair1       | 3.89474E-43 | 1.05509464 | 0.601 | 0.339 | 1.20943E-38 | KO | Lair1      | 0.262 |
| Cyp27a1     | 3.97534E-43 | 1.81136893 | 0.151 | 0.027 | 1.23446E-38 | KO | Cyp27a1    | 0.124 |
| Cdc5l       | 4.24478E-43 | 0.92673925 | 0.343 | 0.12  | 1.31813E-38 | KO | Cdc5l      | 0.223 |
| Nipbl       | 4.41651E-43 | 0.8118802  | 0.427 | 0.169 | 1.37146E-38 | KO | Nipbl      | 0.258 |
| Itsn2       | 4.44183E-43 | 0.73571647 | 0.423 | 0.166 | 1.37932E-38 | KO | Itsn2      | 0.257 |
| Atp6v1c1    | 5.23295E-43 | 0.8134135  | 0.554 | 0.26  | 1.62499E-38 | KO | Atp6v1c1   | 0.294 |
| Arg1        | 6.71758E-43 | 1.76420164 | 0.539 | 0.303 | 2.08601E-38 | KO | Arg1       | 0.236 |
| Ctdnep1     | 6.87989E-43 | 0.79867095 | 0.502 | 0.217 | 2.13641E-38 | KO | Ctdnep1    | 0.285 |
| Ehd4        | 7.18195E-43 | 0.92658448 | 0.623 | 0.34  | 2.23021E-38 | KO | Ehd4       | 0.283 |
| Akt2        | 7.83331E-43 | 0.87203129 | 0.314 | 0.103 | 2.43248E-38 | KO | Akt2       | 0.211 |
| Gpr183      | 7.916E-43   | 1.69276241 | 0.186 | 0.042 | 2.45816E-38 | KO | Gpr183     | 0.144 |
| Prdm2       | 8.38129E-43 | 1.40321504 | 0.174 | 0.036 | 2.60264E-38 | KO | Prdm2      | 0.138 |
| Ints12      | 9.21238E-43 | 1.04616915 | 0.21  | 0.052 | 2.86072E-38 | KO | Ints12     | 0.158 |
| Tdrd7       | 1.00859E-42 | 1.39677103 | 0.187 | 0.042 | 3.13199E-38 | KO | Tdrd7      | 0.145 |
| Pak2        | 1.033E-42   | 0.82673551 | 0.614 | 0.309 | 3.20778E-38 | KO | Pak2       | 0.305 |
| Tmem88      | 1.29213E-42 | 2.04731717 | 0.1   | 0.01  | 4.01246E-38 | KO | Tmem88     | 0.09  |
| Mapkapk3    | 1.30129E-42 | 1.21696482 | 0.22  | 0.058 | 4.04089E-38 | KO | Mapkapk3   | 0.162 |
| Tcp11l2     | 1.35755E-42 | 1.2544014  | 0.194 | 0.045 | 4.21559E-38 | KO | Tcp11l2    | 0.149 |
| Nfam1       | 1.3658E-42  | 1.06359266 | 0.331 | 0.115 | 4.24122E-38 | KO | Nfam1      | 0.216 |
| Gls         | 1.37349E-42 | 1.03349502 | 0.537 | 0.248 | 4.2651E-38  | KO | Gls        | 0.289 |
| Tor3a       | 1.45079E-42 | 1.02180552 | 0.296 | 0.096 | 4.50515E-38 | KO | Tor3a      | 0.2   |
| Rasgrp4     | 1.47837E-42 | 1.47331459 | 0.151 | 0.028 | 4.59079E-38 | KO | Rasgrp4    | 0.123 |
| Med13l      | 1.72339E-42 | 0.86875644 | 0.331 | 0.114 | 5.35166E-38 | KO | Med13l     | 0.217 |
| Trim30d     | 1.8211E-42  | 1.48849636 | 0.183 | 0.041 | 5.65505E-38 | KO | Trim30d    | 0.142 |
| Rufy3       | 2.06889E-42 | 0.83909235 | 0.374 | 0.137 | 6.42453E-38 | KO | Rufy3      | 0.237 |
| Ppp1r18     | 2.09742E-42 | 0.89033899 | 0.599 | 0.298 | 6.51312E-38 | KO | Ppp1r18    | 0.301 |
| Clec4a3     | 2.42361E-42 | 0.86540623 | 0.672 | 0.384 | 7.52603E-38 | KO | Clec4a3    | 0.288 |
| Atxn2       | 2.52477E-42 | 1.21312441 | 0.255 | 0.075 | 7.84016E-38 | KO | Atxn2      | 0.18  |
| Cdc42ep2    | 2.95142E-42 | 1.67366253 | 0.147 | 0.027 | 9.16503E-38 | KO | Cdc42ep2   | 0.12  |
| 9530068E07R | 2.98228E-42 | 0.89220316 | 0.493 | 0.215 | 9.26088E-38 | KO | 9530068E07 | 0.278 |
| Mgrn1       | 3.09269E-42 | 0.77113616 | 0.429 | 0.172 | 9.60371E-38 | KO | Mgrn1      | 0.257 |
| Nfya        | 3.36517E-42 | 1.19334469 | 0.218 | 0.057 | 1.04499E-37 | KO | Nfya       | 0.161 |
| Hivep3      | 3.61066E-42 | 1.43479687 | 0.195 | 0.047 | 1.12122E-37 | KO | Hivep3     | 0.148 |
| Nr1h3       | 3.74457E-42 | 1.47583772 | 0.26  | 0.08  | 1.1628E-37  | KO | Nr1h3      | 0.18  |
| Arsa        | 3.84598E-42 | 1.20829498 | 0.152 | 0.028 | 1.19429E-37 | KO | Arsa       | 0.124 |
| Irf5        | 4.42699E-42 | 0.72816956 | 0.593 | 0.286 | 1.37471E-37 | KO | Irf5       | 0.307 |
| Mia2        | 5.20661E-42 | 0.84633355 | 0.45  | 0.187 | 1.61681E-37 | KO | Mia2       | 0.263 |
| Usp25       | 5.29795E-42 | 0.77242915 | 0.415 | 0.165 | 1.64517E-37 | KO | Usp25      | 0.25  |
| Ubn1        | 7.01934E-42 | 1.00628538 | 0.346 | 0.123 | 2.17971E-37 | KO | Ubn1       | 0.223 |
| Arhgef10l   | 8.81986E-42 | 1.32821672 | 0.19  | 0.045 | 2.73883E-37 | KO | Arhgef10l  | 0.145 |
| Adora2a     | 9.56633E-42 | 2.88051319 | 0.076 | 0.004 | 2.97063E-37 | KO | Adora2a    | 0.072 |
| Gltp        | 1.41458E-41 | 0.897146   | 0.696 | 0.392 | 4.39268E-37 | KO | Gltp       | 0.304 |
| Amz1        | 1.68082E-41 | 0.86241541 | 0.187 | 0.043 | 5.21944E-37 | KO | Amz1       | 0.144 |
| Ccnt1       | 1.71027E-41 | 0.73974209 | 0.308 | 0.103 | 5.3109E-37  | KO | Ccnt1      | 0.205 |
| Fam234a     | 1.75164E-41 | 0.84428834 | 0.291 | 0.094 | 5.43936E-37 | KO | Fam234a    | 0.197 |
| Tmem164     | 1.77352E-41 | 1.05348345 | 0.284 | 0.09  | 5.50732E-37 | KO | Tmem164    | 0.194 |
| Sh2d2a      | 1.93754E-41 | 2.92481113 | 0.084 | 0.006 | 6.01666E-37 | KO | Sh2d2a     | 0.078 |
| Eif2ak2     | 2.38784E-41 | 1.14475045 | 0.196 | 0.048 | 7.41497E-37 | KO | Eif2ak2    | 0.148 |
| Ube2r2      | 2.40741E-41 | 0.79888027 | 0.426 | 0.171 | 7.47573E-37 | KO | Ube2r2     | 0.255 |
| Plac8       | 2.75404E-41 | 1.31292309 | 0.417 | 0.182 | 8.55211E-37 | KO | Plac8      | 0.235 |
| Asph        | 2.7969E-41  | 0.77738473 | 0.483 | 0.211 | 8.68522E-37 | KO | Asph       | 0.272 |
| Krt80       | 2.85186E-41 | 1.78691592 | 0.124 | 0.019 | 8.85589E-37 | KO | Krt80      | 0.105 |
| Psme2       | 2.86195E-41 | 0.83379649 | 0.742 | 0.509 | 8.8872E-37  | KO | Psme2      | 0.233 |
| Hcls1       | 2.8792E-41  | 0.83849872 | 0.653 | 0.35  | 8.94079E-37 | KO | Hcls1      | 0.303 |

|          |             |            |       |       |             |    |          |       |
|----------|-------------|------------|-------|-------|-------------|----|----------|-------|
| Abca9    | 3.29967E-41 | 2.22900785 | 0.124 | 0.019 | 1.02465E-36 | KO | Abca9    | 0.105 |
| Fam20c   | 5.90042E-41 | 0.82146584 | 0.3   | 0.101 | 1.83226E-36 | KO | Fam20c   | 0.199 |
| Rbbp8    | 7.40432E-41 | 1.1006944  | 0.235 | 0.066 | 2.29926E-36 | KO | Rbbp8    | 0.169 |
| Ubd      | 7.91408E-41 | 4.06895073 | 0.059 | 0.001 | 2.45756E-36 | KO | Ubd      | 0.058 |
| Sgpl1    | 8.77624E-41 | 0.71670554 | 0.645 | 0.35  | 2.72529E-36 | KO | Sgpl1    | 0.295 |
| Rapgef6  | 9.02787E-41 | 0.91911256 | 0.27  | 0.084 | 2.80343E-36 | KO | Rapgef6  | 0.186 |
| Katna1   | 1.00815E-40 | 1.01600902 | 0.291 | 0.095 | 3.13062E-36 | KO | Katna1   | 0.196 |
| Xaf1     | 1.27446E-40 | 0.710053   | 0.29  | 0.094 | 3.95757E-36 | KO | Xaf1     | 0.196 |
| Usp19    | 1.42254E-40 | 0.98292366 | 0.3   | 0.1   | 4.41742E-36 | KO | Usp19    | 0.2   |
| Apaf1    | 1.44933E-40 | 0.90884291 | 0.248 | 0.073 | 4.50059E-36 | KO | Apaf1    | 0.175 |
| Ufsp2    | 1.5046E-40  | 0.78842834 | 0.316 | 0.108 | 4.67222E-36 | KO | Ufsp2    | 0.208 |
| Mttr14   | 1.54067E-40 | 1.43244638 | 0.195 | 0.048 | 4.78425E-36 | KO | Mttr14   | 0.147 |
| Sh3bp1   | 2.56829E-40 | 0.91635466 | 0.347 | 0.127 | 7.97531E-36 | KO | Sh3bp1   | 0.22  |
| Rnf13    | 2.58712E-40 | 0.83798456 | 0.489 | 0.217 | 8.03378E-36 | KO | Rnf13    | 0.272 |
| Tank     | 2.60326E-40 | 0.84704917 | 0.33  | 0.118 | 8.08389E-36 | KO | Tank     | 0.212 |
| Adar     | 2.72945E-40 | 0.97720802 | 0.231 | 0.064 | 8.47575E-36 | KO | Adar     | 0.167 |
| Rnf149   | 2.77503E-40 | 0.949517   | 0.745 | 0.497 | 8.61729E-36 | KO | Rnf149   | 0.248 |
| Pfcp     | 2.8002E-40  | 0.79873756 | 0.583 | 0.292 | 8.69545E-36 | KO | Pfcp     | 0.291 |
| Syvn1    | 3.20306E-40 | 1.27414567 | 0.198 | 0.049 | 9.94646E-36 | KO | Syvn1    | 0.149 |
| Sec62    | 3.26828E-40 | 0.76990863 | 0.522 | 0.24  | 1.0149E-35  | KO | Sec62    | 0.282 |
| Glg1     | 3.54601E-40 | 0.73095453 | 0.434 | 0.18  | 1.10114E-35 | KO | Glg1     | 0.254 |
| Gem      | 3.85524E-40 | 2.19638196 | 0.092 | 0.009 | 1.19717E-35 | KO | Gem      | 0.083 |
| Cdipt    | 4.82262E-40 | 0.98101002 | 0.386 | 0.153 | 1.49757E-35 | KO | Cdipt    | 0.233 |
| Neat1    | 5.77499E-40 | 0.82237459 | 0.854 | 0.594 | 1.79331E-35 | KO | Neat1    | 0.26  |
| Akr1a1   | 5.83429E-40 | 0.7423895  | 0.84  | 0.71  | 1.81172E-35 | KO | Akr1a1   | 0.13  |
| Edem1    | 6.4667E-40  | 0.82079747 | 0.622 | 0.324 | 2.0081E-35  | KO | Edem1    | 0.298 |
| Clec2d   | 6.89062E-40 | 0.95073738 | 0.526 | 0.255 | 2.13974E-35 | KO | Clec2d   | 0.271 |
| Zc3h12c  | 6.9178E-40  | 1.55203987 | 0.128 | 0.021 | 2.14818E-35 | KO | Zc3h12c  | 0.107 |
| Rap1gds1 | 7.10959E-40 | 0.90128826 | 0.339 | 0.123 | 2.20774E-35 | KO | Rap1gds1 | 0.216 |
| Aebp2    | 8.64558E-40 | 0.88301841 | 0.347 | 0.13  | 2.68471E-35 | KO | Aebp2    | 0.217 |
| Vrk3     | 1.01572E-39 | 1.04533506 | 0.254 | 0.077 | 3.15411E-35 | KO | Vrk3     | 0.177 |
| Chtf8    | 1.0967E-39  | 1.05235967 | 0.243 | 0.073 | 3.40559E-35 | KO | Chtf8    | 0.17  |
| Cdc42ep4 | 1.14863E-39 | 1.07432035 | 0.18  | 0.042 | 3.56683E-35 | KO | Cdc42ep4 | 0.138 |
| Plod3    | 1.15377E-39 | 0.81960291 | 0.294 | 0.097 | 3.58282E-35 | KO | Plod3    | 0.197 |
| Ankrd12  | 1.27865E-39 | 0.88177391 | 0.315 | 0.111 | 3.97059E-35 | KO | Ankrd12  | 0.204 |
| Ehd1     | 1.3327E-39  | 0.97485784 | 0.623 | 0.343 | 4.13844E-35 | KO | Ehd1     | 0.28  |
| Nrp1     | 1.33817E-39 | 0.82372997 | 0.466 | 0.21  | 4.15541E-35 | KO | Nrp1     | 0.256 |
| Homer1   | 1.48171E-39 | 1.54423162 | 0.168 | 0.037 | 4.60116E-35 | KO | Homer1   | 0.131 |
| Kat2b    | 1.64756E-39 | 1.31387316 | 0.231 | 0.067 | 5.11615E-35 | KO | Kat2b    | 0.164 |
| Usp7     | 1.73728E-39 | 0.76098859 | 0.398 | 0.157 | 5.39477E-35 | KO | Usp7     | 0.241 |
| Man2b2   | 1.99695E-39 | 1.32000978 | 0.184 | 0.044 | 6.20113E-35 | KO | Man2b2   | 0.14  |
| Herc6    | 2.03805E-39 | 0.99002901 | 0.194 | 0.048 | 6.32876E-35 | KO | Herc6    | 0.146 |
| Gsap     | 2.28771E-39 | 0.90420553 | 0.24  | 0.071 | 7.10403E-35 | KO | Gsap     | 0.169 |
| Rasgrp1  | 2.37445E-39 | 2.0524071  | 0.103 | 0.013 | 7.37337E-35 | KO | Rasgrp1  | 0.09  |
| Atxn7    | 2.40919E-39 | 1.03394048 | 0.216 | 0.059 | 7.48125E-35 | KO | Atxn7    | 0.157 |
| Ero1lb   | 2.49505E-39 | 1.3800882  | 0.174 | 0.039 | 7.74788E-35 | KO | Ero1lb   | 0.135 |
| Rgcc     | 2.83362E-39 | 1.36709227 | 0.367 | 0.155 | 8.79924E-35 | KO | Rgcc     | 0.212 |
| Snx9     | 3.04049E-39 | 0.90767258 | 0.346 | 0.128 | 9.44163E-35 | KO | Snx9     | 0.218 |
| Baz1a    | 3.29761E-39 | 0.76703425 | 0.389 | 0.152 | 1.02401E-34 | KO | Baz1a    | 0.237 |
| Stat5b   | 3.35328E-39 | 1.08121267 | 0.232 | 0.067 | 1.04129E-34 | KO | Stat5b   | 0.165 |
| Map4k1   | 3.91326E-39 | 1.39917161 | 0.166 | 0.036 | 1.21518E-34 | KO | Map4k1   | 0.13  |
| Arhgap18 | 5.0314E-39  | 0.99798465 | 0.324 | 0.117 | 1.5624E-34  | KO | Arhgap18 | 0.207 |
| Rc3h1    | 5.91626E-39 | 0.94911792 | 0.278 | 0.09  | 1.83718E-34 | KO | Rc3h1    | 0.188 |
| Adam17   | 6.49045E-39 | 0.70216168 | 0.51  | 0.232 | 2.01548E-34 | KO | Adam17   | 0.278 |

|          |             |            |       |       |             |    |          |       |
|----------|-------------|------------|-------|-------|-------------|----|----------|-------|
| H2-T24   | 6.49251E-39 | 2.08990901 | 0.093 | 0.01  | 2.01612E-34 | KO | H2-T24   | 0.083 |
| Aftph    | 7.47168E-39 | 0.95028655 | 0.335 | 0.123 | 2.32018E-34 | KO | Aftph    | 0.212 |
| Fam114a2 | 7.63103E-39 | 0.99718221 | 0.246 | 0.075 | 2.36966E-34 | KO | Fam114a2 | 0.171 |
| Lipa     | 8.07375E-39 | 0.9171328  | 0.534 | 0.274 | 2.50714E-34 | KO | Lipa     | 0.26  |
| Ddx3x    | 8.58837E-39 | 0.79435609 | 0.64  | 0.339 | 2.66695E-34 | KO | Ddx3x    | 0.301 |
| BC037034 | 9.21066E-39 | 0.98923121 | 0.199 | 0.051 | 2.86019E-34 | KO | BC037034 | 0.148 |
| Al467606 | 9.2171E-39  | 1.73359737 | 0.14  | 0.027 | 2.86219E-34 | KO | Al467606 | 0.113 |
| Pros1    | 1.02199E-38 | 1.53660615 | 0.21  | 0.058 | 3.1736E-34  | KO | Pros1    | 0.152 |
| Itpr1    | 1.04855E-38 | 1.49184987 | 0.152 | 0.031 | 3.25608E-34 | KO | Itpr1    | 0.121 |
| Tlr4     | 1.09154E-38 | 1.04739994 | 0.274 | 0.089 | 3.38955E-34 | KO | Tlr4     | 0.185 |
| Jak2     | 1.19227E-38 | 1.2046103  | 0.278 | 0.092 | 3.70237E-34 | KO | Jak2     | 0.186 |
| Mpp1     | 1.21076E-38 | 0.77545881 | 0.579 | 0.294 | 3.75977E-34 | KO | Mpp1     | 0.285 |
| Cass4    | 1.21554E-38 | 2.55867952 | 0.085 | 0.008 | 3.77461E-34 | KO | Cass4    | 0.077 |
| Rabep1   | 1.22473E-38 | 0.9993387  | 0.266 | 0.085 | 3.80314E-34 | KO | Rabep1   | 0.181 |
| Tcirg1   | 1.35665E-38 | 0.71190044 | 0.706 | 0.415 | 4.21279E-34 | KO | Tcirg1   | 0.291 |
| Sgk3     | 1.39483E-38 | 1.03986248 | 0.288 | 0.098 | 4.33138E-34 | KO | Sgk3     | 0.19  |
| Sqor     | 1.41055E-38 | 1.1000786  | 0.247 | 0.076 | 4.38018E-34 | KO | Sqor     | 0.171 |
| Wac      | 1.51113E-38 | 0.74153708 | 0.395 | 0.157 | 4.6925E-34  | KO | Wac      | 0.238 |
| Sept9    | 1.63915E-38 | 0.70309031 | 0.571 | 0.277 | 5.09006E-34 | KO | Sept9    | 0.294 |
| Phf11b   | 1.665E-38   | 0.91330846 | 0.306 | 0.108 | 5.17032E-34 | KO | Phf11b   | 0.198 |
| Glipr1   | 1.80635E-38 | 0.97442278 | 0.34  | 0.13  | 5.60926E-34 | KO | Glipr1   | 0.21  |
| Gm15056  | 1.96499E-38 | 4.23737203 | 0.059 | 0.002 | 6.10189E-34 | KO | Gm15056  | 0.057 |
| Tpst1    | 2.17361E-38 | 1.53335229 | 0.159 | 0.034 | 6.74971E-34 | KO | Tpst1    | 0.125 |
| Rhbdf2   | 2.2632E-38  | 0.87156751 | 0.338 | 0.125 | 7.0279E-34  | KO | Rhbdf2   | 0.213 |
| Nod1     | 2.31078E-38 | 0.94622832 | 0.15  | 0.03  | 7.17565E-34 | KO | Nod1     | 0.12  |
| Tmem127  | 2.42065E-38 | 1.01173766 | 0.232 | 0.068 | 7.51685E-34 | KO | Tmem127  | 0.164 |
| Acp2     | 2.4241E-38  | 0.79345546 | 0.399 | 0.162 | 7.52755E-34 | KO | Acp2     | 0.237 |
| Rap2c    | 2.71979E-38 | 0.77255901 | 0.338 | 0.127 | 8.44578E-34 | KO | Rap2c    | 0.211 |
| Bscl2    | 3.39118E-38 | 0.830971   | 0.433 | 0.183 | 1.05306E-33 | KO | Bscl2    | 0.25  |
| Ft1      | 3.41828E-38 | 0.75504725 | 0.214 | 0.059 | 1.06148E-33 | KO | Ft1      | 0.155 |
| Slc25a25 | 4.69132E-38 | 1.20173127 | 0.167 | 0.038 | 1.4568E-33  | KO | Slc25a25 | 0.129 |
| Ppfia4   | 5.12397E-38 | 1.21160582 | 0.162 | 0.036 | 1.59115E-33 | KO | Ppfia4   | 0.126 |
| Inhba    | 5.15643E-38 | 2.26665347 | 0.136 | 0.026 | 1.60123E-33 | KO | Inhba    | 0.11  |
| Tmf1     | 5.5365E-38  | 0.94132403 | 0.268 | 0.088 | 1.71925E-33 | KO | Tmf1     | 0.18  |
| Pianp    | 5.99657E-38 | 1.57603021 | 0.146 | 0.03  | 1.86212E-33 | KO | Pianp    | 0.116 |
| Lrrc8d   | 6.22287E-38 | 0.85683367 | 0.294 | 0.101 | 1.93239E-33 | KO | Lrrc8d   | 0.193 |
| Strn3    | 6.41144E-38 | 0.80796032 | 0.346 | 0.13  | 1.99094E-33 | KO | Strn3    | 0.216 |
| Arhgap10 | 6.74585E-38 | 0.94164223 | 0.36  | 0.143 | 2.09479E-33 | KO | Arhgap10 | 0.217 |
| Ece1     | 7.5418E-38  | 1.58485148 | 0.16  | 0.035 | 2.34196E-33 | KO | Ece1     | 0.125 |
| Sbds     | 7.73249E-38 | 0.87170083 | 0.324 | 0.118 | 2.40117E-33 | KO | Sbds     | 0.206 |
| Polr2m   | 7.84548E-38 | 0.88572497 | 0.307 | 0.108 | 2.43626E-33 | KO | Polr2m   | 0.199 |
| Pepd     | 8.1386E-38  | 1.03795422 | 0.398 | 0.165 | 2.52728E-33 | KO | Pepd     | 0.233 |
| Mmp13    | 8.70531E-38 | 1.35569959 | 0.19  | 0.05  | 2.70326E-33 | KO | Mmp13    | 0.14  |
| Dgkd     | 9.01403E-38 | 1.07834552 | 0.239 | 0.073 | 2.79913E-33 | KO | Dgkd     | 0.166 |
| Bet1     | 9.15708E-38 | 0.76024779 | 0.34  | 0.126 | 2.84355E-33 | KO | Bet1     | 0.214 |
| Ap3d1    | 1.13907E-37 | 0.84254634 | 0.314 | 0.113 | 3.53714E-33 | KO | Ap3d1    | 0.201 |
| Acsl4    | 1.15195E-37 | 0.9559343  | 0.367 | 0.145 | 3.57715E-33 | KO | Acsl4    | 0.222 |
| Odc1     | 1.42333E-37 | 1.02589358 | 0.557 | 0.292 | 4.41987E-33 | KO | Odc1     | 0.265 |
| Rabgap1l | 1.52973E-37 | 1.5412171  | 0.135 | 0.025 | 4.75028E-33 | KO | Rabgap1l | 0.11  |
| Ftl1-ps1 | 1.60583E-37 | 0.8445884  | 0.399 | 0.163 | 4.98658E-33 | KO | Ftl1-ps1 | 0.236 |
| Gm48065  | 2.07307E-37 | 1.96700312 | 0.104 | 0.014 | 6.43751E-33 | KO | Gm48065  | 0.09  |
| Ptger2   | 2.55116E-37 | 1.63701314 | 0.131 | 0.024 | 7.92211E-33 | KO | Ptger2   | 0.107 |
| Dennd1b  | 3.20121E-37 | 0.71770819 | 0.342 | 0.128 | 9.94072E-33 | KO | Dennd1b  | 0.214 |
| Ccdc88b  | 3.36905E-37 | 0.84639178 | 0.248 | 0.077 | 1.04619E-32 | KO | Ccdc88b  | 0.171 |

|            |             |            |       |       |             |    |            |       |
|------------|-------------|------------|-------|-------|-------------|----|------------|-------|
| Gstm1      | 3.89743E-37 | 1.38821928 | 0.284 | 0.102 | 1.21027E-32 | KO | Gstm1      | 0.182 |
| Cand1      | 4.43734E-37 | 1.11076643 | 0.266 | 0.089 | 1.37793E-32 | KO | Cand1      | 0.177 |
| Tbl1xr1    | 4.52286E-37 | 1.00954875 | 0.327 | 0.122 | 1.40448E-32 | KO | Tbl1xr1    | 0.205 |
| Slk        | 5.63641E-37 | 0.86123867 | 0.431 | 0.188 | 1.75027E-32 | KO | Slk        | 0.243 |
| Ing4       | 6.36153E-37 | 0.88032873 | 0.203 | 0.055 | 1.97545E-32 | KO | Ing4       | 0.148 |
| Otud5      | 7.33263E-37 | 0.81855688 | 0.29  | 0.101 | 2.277E-32   | KO | Otud5      | 0.189 |
| Nrip1      | 9.09262E-37 | 1.04792322 | 0.303 | 0.11  | 2.82353E-32 | KO | Nrip1      | 0.193 |
| Myd88      | 9.27679E-37 | 0.92589246 | 0.311 | 0.114 | 2.88072E-32 | KO | Myd88      | 0.197 |
| Gm5547     | 1.19057E-36 | 2.12313477 | 0.097 | 0.012 | 3.69707E-32 | KO | Gm5547     | 0.085 |
| Itpkc      | 1.21586E-36 | 1.85394244 | 0.124 | 0.022 | 3.77561E-32 | KO | Itpkc      | 0.102 |
| Gns        | 1.52872E-36 | 0.72256931 | 0.736 | 0.491 | 4.74713E-32 | KO | Gns        | 0.245 |
| Dbnl       | 1.7014E-36  | 0.73424804 | 0.513 | 0.242 | 5.28336E-32 | KO | Dbnl       | 0.271 |
| Cd209a     | 1.73112E-36 | 4.49954193 | 0.049 | 0     | 5.37566E-32 | KO | Cd209a     | 0.049 |
| Plpp3      | 1.89528E-36 | 1.64645074 | 0.123 | 0.021 | 5.88541E-32 | KO | Plpp3      | 0.102 |
| Dnaaf3     | 1.97152E-36 | 1.86531624 | 0.072 | 0.005 | 6.12217E-32 | KO | Dnaaf3     | 0.067 |
| Sdhd       | 2.24213E-36 | 0.71669284 | 0.519 | 0.248 | 6.96249E-32 | KO | Sdhd       | 0.271 |
| Ssr3       | 2.4951E-36  | 0.71678095 | 0.694 | 0.393 | 7.74804E-32 | KO | Ssr3       | 0.301 |
| Fbxo32     | 2.55558E-36 | 2.23547537 | 0.112 | 0.018 | 7.93585E-32 | KO | Fbxo32     | 0.094 |
| Psm2       | 2.6196E-36  | 0.82597875 | 0.587 | 0.299 | 8.13463E-32 | KO | Psm2       | 0.288 |
| St3gal1    | 2.72911E-36 | 0.96330182 | 0.224 | 0.066 | 8.47471E-32 | KO | St3gal1    | 0.158 |
| Pex6       | 3.21243E-36 | 1.19808403 | 0.176 | 0.044 | 9.97555E-32 | KO | Pex6       | 0.132 |
| Mttr10     | 3.36361E-36 | 0.78413349 | 0.231 | 0.07  | 1.0445E-31  | KO | Mttr10     | 0.161 |
| Csf1       | 3.64425E-36 | 3.5015951  | 0.099 | 0.013 | 1.13165E-31 | KO | Csf1       | 0.086 |
| Zfp622     | 3.78055E-36 | 0.89505455 | 0.351 | 0.139 | 1.17397E-31 | KO | Zfp622     | 0.212 |
| Foxp1      | 5.5882E-36  | 0.72593463 | 0.537 | 0.269 | 1.7353E-31  | KO | Foxp1      | 0.268 |
| Slc31a1    | 5.98333E-36 | 0.73749291 | 0.469 | 0.217 | 1.858E-31   | KO | Slc31a1    | 0.252 |
| Sertad1    | 6.27014E-36 | 0.72491039 | 0.363 | 0.145 | 1.94707E-31 | KO | Sertad1    | 0.218 |
| Gfra2      | 6.3172E-36  | 3.51163263 | 0.052 | 0.001 | 1.96168E-31 | KO | Gfra2      | 0.051 |
| Olfm1      | 8.262E-36   | 1.41507778 | 0.274 | 0.099 | 2.5656E-31  | KO | Olfm1      | 0.175 |
| Add3       | 9.57179E-36 | 1.40355473 | 0.156 | 0.036 | 2.97233E-31 | KO | Add3       | 0.12  |
| Med12      | 1.15403E-35 | 1.0392332  | 0.192 | 0.052 | 3.5836E-31  | KO | Med12      | 0.14  |
| Mink1      | 1.17951E-35 | 0.90510461 | 0.222 | 0.067 | 3.66274E-31 | KO | Mink1      | 0.155 |
| Fam120a    | 1.2525E-35  | 0.94097103 | 0.491 | 0.232 | 3.88939E-31 | KO | Fam120a    | 0.259 |
| Cd2ap      | 1.29644E-35 | 1.05994887 | 0.34  | 0.135 | 4.02583E-31 | KO | Cd2ap      | 0.205 |
| Mbp        | 1.31487E-35 | 1.1138899  | 0.199 | 0.055 | 4.08307E-31 | KO | Mbp        | 0.144 |
| Ifi207     | 1.4176E-35  | 0.74498609 | 0.668 | 0.393 | 4.40208E-31 | KO | Ifi207     | 0.275 |
| AC149090.1 | 1.66565E-35 | 0.83500803 | 0.395 | 0.167 | 5.17235E-31 | KO | AC149090.1 | 0.228 |
| Fbrsl1     | 1.67254E-35 | 1.501669   | 0.158 | 0.037 | 5.19374E-31 | KO | Fbrsl1     | 0.121 |
| Cd93       | 1.81864E-35 | 0.87429767 | 0.642 | 0.414 | 5.64743E-31 | KO | Cd93       | 0.228 |
| Itpril2    | 1.92639E-35 | 0.77981677 | 0.39  | 0.162 | 5.98202E-31 | KO | Itpril2    | 0.228 |
| Exoc3l4    | 2.34531E-35 | 1.61305147 | 0.097 | 0.013 | 7.2829E-31  | KO | Exoc3l4    | 0.084 |
| Ric8a      | 2.36163E-35 | 0.73861037 | 0.288 | 0.102 | 7.33357E-31 | KO | Ric8a      | 0.186 |
| Cd22       | 2.53779E-35 | 1.22450752 | 0.152 | 0.034 | 7.88059E-31 | KO | Cd22       | 0.118 |
| Plcb2      | 2.78735E-35 | 1.0790277  | 0.143 | 0.03  | 8.65556E-31 | KO | Plcb2      | 0.113 |
| Tm6sf1     | 2.84355E-35 | 0.73818662 | 0.587 | 0.307 | 8.83007E-31 | KO | Tm6sf1     | 0.28  |
| Rab3d      | 2.85001E-35 | 0.83411866 | 0.214 | 0.063 | 8.85013E-31 | KO | Rab3d      | 0.151 |
| Zzef1      | 2.85696E-35 | 0.7275462  | 0.247 | 0.079 | 8.87173E-31 | KO | Zzef1      | 0.168 |
| Mbtd1      | 3.21611E-35 | 1.13037425 | 0.254 | 0.085 | 9.98698E-31 | KO | Mbtd1      | 0.169 |
| Abca1      | 3.50494E-35 | 0.90266387 | 0.545 | 0.289 | 1.08839E-30 | KO | Abca1      | 0.256 |
| Dennd5a    | 3.98689E-35 | 0.72406136 | 0.391 | 0.161 | 1.23805E-30 | KO | Dennd5a    | 0.23  |
| Ammecr1l   | 4.6472E-35  | 0.91491145 | 0.19  | 0.051 | 1.4431E-30  | KO | Ammecr1l   | 0.139 |
| Cnot6l     | 4.81767E-35 | 0.70560675 | 0.355 | 0.141 | 1.49603E-30 | KO | Cnot6l     | 0.214 |
| Serpinb8   | 5.1374E-35  | 1.55318605 | 0.176 | 0.046 | 1.59532E-30 | KO | Serpinb8   | 0.13  |
| Ikzf1      | 5.27395E-35 | 0.98823549 | 0.356 | 0.145 | 1.63772E-30 | KO | Ikzf1      | 0.211 |

|             |             |            |       |       |             |    |            |       |
|-------------|-------------|------------|-------|-------|-------------|----|------------|-------|
| Eif4e3      | 6.32625E-35 | 0.97667408 | 0.247 | 0.081 | 1.96449E-30 | KO | Eif4e3     | 0.166 |
| Trim12a     | 6.33769E-35 | 0.97977703 | 0.182 | 0.048 | 1.96804E-30 | KO | Trim12a    | 0.134 |
| Fam20b      | 6.87815E-35 | 1.11611297 | 0.192 | 0.053 | 2.13587E-30 | KO | Fam20b     | 0.139 |
| Prex1       | 7.29842E-35 | 0.69955969 | 0.37  | 0.149 | 2.26638E-30 | KO | Prex1      | 0.221 |
| Tcea1       | 7.41601E-35 | 0.69415946 | 0.446 | 0.197 | 2.30289E-30 | KO | Tcea1      | 0.249 |
| 1810030007F | 7.51978E-35 | 1.1631059  | 0.223 | 0.068 | 2.33512E-30 | KO | 1810030007 | 0.155 |
| Acer3       | 7.89609E-35 | 0.71738761 | 0.441 | 0.193 | 2.45197E-30 | KO | Acer3      | 0.248 |
| Hcst        | 8.42198E-35 | 0.72469813 | 0.43  | 0.191 | 2.61528E-30 | KO | Hcst       | 0.239 |
| Dirc2       | 1.00026E-34 | 0.73443022 | 0.204 | 0.058 | 3.10611E-30 | KO | Dirc2      | 0.146 |
| Gabarapl1   | 1.00263E-34 | 0.69936158 | 0.267 | 0.091 | 3.11346E-30 | KO | Gabarapl1  | 0.176 |
| Ptgs1       | 1.08303E-34 | 2.51489164 | 0.084 | 0.009 | 3.36314E-30 | KO | Ptgs1      | 0.075 |
| Pik3ca      | 1.11249E-34 | 0.88765029 | 0.202 | 0.058 | 3.45461E-30 | KO | Pik3ca     | 0.144 |
| Shtn1       | 1.18336E-34 | 1.19348551 | 0.34  | 0.138 | 3.6747E-30  | KO | Shtn1      | 0.202 |
| Klf13       | 1.24929E-34 | 0.70213776 | 0.579 | 0.307 | 3.8794E-30  | KO | Klf13      | 0.272 |
| Fam105a     | 1.26132E-34 | 0.70745846 | 0.368 | 0.152 | 3.91679E-30 | KO | Fam105a    | 0.216 |
| Erap1       | 1.28083E-34 | 0.82258427 | 0.295 | 0.107 | 3.97736E-30 | KO | Erap1      | 0.188 |
| Slc16a10    | 1.36958E-34 | 0.75569018 | 0.298 | 0.109 | 4.25297E-30 | KO | Slc16a10   | 0.189 |
| Kras        | 1.39173E-34 | 0.72261148 | 0.411 | 0.179 | 4.32175E-30 | KO | Kras       | 0.232 |
| Dapk1       | 1.41804E-34 | 1.4542556  | 0.16  | 0.039 | 4.40343E-30 | KO | Dapk1      | 0.121 |
| Dnajc14     | 1.46388E-34 | 1.02714734 | 0.215 | 0.064 | 4.54579E-30 | KO | Dnajc14    | 0.151 |
| Rapgef2     | 1.4801E-34  | 1.00908564 | 0.283 | 0.102 | 4.59616E-30 | KO | Rapgef2    | 0.181 |
| Rassf5      | 1.68861E-34 | 1.06079043 | 0.24  | 0.078 | 5.24364E-30 | KO | Rassf5     | 0.162 |
| Tmem50a     | 1.82299E-34 | 0.73737603 | 0.773 | 0.541 | 5.66093E-30 | KO | Tmem50a    | 0.232 |
| Fem1b       | 1.84536E-34 | 1.02823812 | 0.318 | 0.123 | 5.73039E-30 | KO | Fem1b      | 0.195 |
| Aff4        | 1.84858E-34 | 0.8477507  | 0.34  | 0.135 | 5.74041E-30 | KO | Aff4       | 0.205 |
| Nrp2        | 1.86957E-34 | 1.04638637 | 0.427 | 0.194 | 5.80556E-30 | KO | Nrp2       | 0.233 |
| Wdtdc1      | 1.91846E-34 | 0.83295715 | 0.146 | 0.032 | 5.95739E-30 | KO | Wdtdc1     | 0.114 |
| Il6st       | 2.0058E-34  | 0.94171772 | 0.236 | 0.076 | 6.22861E-30 | KO | Il6st      | 0.16  |
| Vmp1        | 2.27469E-34 | 0.78989146 | 0.68  | 0.395 | 7.06358E-30 | KO | Vmp1       | 0.285 |
| Ttc3        | 2.32583E-34 | 0.98366056 | 0.227 | 0.071 | 7.22241E-30 | KO | Ttc3       | 0.156 |
| Fbxw7       | 2.47395E-34 | 1.03510935 | 0.187 | 0.051 | 7.68236E-30 | KO | Fbxw7      | 0.136 |
| Cxcl9       | 2.89816E-34 | 2.03749382 | 0.441 | 0.242 | 8.99965E-30 | KO | Cxcl9      | 0.199 |
| Lag3        | 3.14918E-34 | 2.45645208 | 0.061 | 0.003 | 9.77914E-30 | KO | Lag3       | 0.058 |
| Fcho2       | 3.17886E-34 | 0.7026927  | 0.375 | 0.155 | 9.87131E-30 | KO | Fcho2      | 0.22  |
| Frat2       | 3.23437E-34 | 1.597108   | 0.105 | 0.017 | 1.00437E-29 | KO | Frat2      | 0.088 |
| Zfp516      | 3.24444E-34 | 1.0548084  | 0.231 | 0.074 | 1.0075E-29  | KO | Zfp516     | 0.157 |
| Lima1       | 3.32065E-34 | 1.19277726 | 0.262 | 0.091 | 1.03116E-29 | KO | Lima1      | 0.171 |
| Syngn2      | 3.48602E-34 | 0.90239154 | 0.591 | 0.314 | 1.08251E-29 | KO | Syngn2     | 0.277 |
| Fam168a     | 3.59577E-34 | 1.18956777 | 0.202 | 0.059 | 1.11659E-29 | KO | Fam168a    | 0.143 |
| Bin3        | 3.70035E-34 | 0.76737794 | 0.323 | 0.123 | 1.14907E-29 | KO | Bin3       | 0.2   |
| Ramp3       | 3.71664E-34 | 2.04591493 | 0.089 | 0.011 | 1.15413E-29 | KO | Ramp3      | 0.078 |
| Ppp1r12a    | 4.95079E-34 | 0.71773471 | 0.372 | 0.154 | 1.53737E-29 | KO | Ppp1r12a   | 0.218 |
| Mgst1       | 5.2646E-34  | 0.97545908 | 0.501 | 0.274 | 1.63482E-29 | KO | Mgst1      | 0.227 |
| Traf5       | 5.71556E-34 | 2.00457764 | 0.115 | 0.02  | 1.77485E-29 | KO | Traf5      | 0.095 |
| Il10        | 5.76101E-34 | 3.01772829 | 0.131 | 0.027 | 1.78897E-29 | KO | Il10       | 0.104 |
| Ccdc50      | 7.10798E-34 | 0.78417731 | 0.442 | 0.202 | 2.20724E-29 | KO | Ccdc50     | 0.24  |
| Sreb2       | 8.92937E-34 | 1.0541889  | 0.246 | 0.083 | 2.77284E-29 | KO | Sreb2      | 0.163 |
| Itpr2       | 9.5444E-34  | 1.4347935  | 0.162 | 0.04  | 2.96382E-29 | KO | Itpr2      | 0.122 |
| Fnbp1       | 1.13938E-33 | 0.91311284 | 0.407 | 0.181 | 3.53812E-29 | KO | Fnbp1      | 0.226 |
| Slc25a45    | 1.15035E-33 | 1.29691585 | 0.163 | 0.04  | 3.57218E-29 | KO | Slc25a45   | 0.123 |
| Ubr4        | 1.20183E-33 | 0.71554628 | 0.283 | 0.101 | 3.73206E-29 | KO | Ubr4       | 0.182 |
| Rps12-ps3   | 1.39435E-33 | 1.79958737 | 0.164 | 0.042 | 4.32987E-29 | KO | Rps12-ps3  | 0.122 |
| Dcstamp     | 1.53167E-33 | 3.55859989 | 0.045 | 0     | 4.75631E-29 | KO | Dcstamp    | 0.045 |
| Zfhx3       | 1.65229E-33 | 1.01857181 | 0.243 | 0.082 | 5.13086E-29 | KO | Zfhx3      | 0.161 |

|            |             |            |       |       |             |    |            |       |
|------------|-------------|------------|-------|-------|-------------|----|------------|-------|
| Ncoa3      | 1.84399E-33 | 0.74594593 | 0.354 | 0.144 | 5.72614E-29 | KO | Ncoa3      | 0.21  |
| Mllt10     | 2.01327E-33 | 1.1986444  | 0.226 | 0.071 | 6.25182E-29 | KO | Mllt10     | 0.155 |
| Lypla2     | 2.2784E-33  | 0.79737178 | 0.347 | 0.142 | 7.07511E-29 | KO | Lypla2     | 0.205 |
| Zmynd8     | 2.4744E-33  | 0.79149133 | 0.29  | 0.106 | 7.68377E-29 | KO | Zmynd8     | 0.184 |
| Ii27       | 2.90928E-33 | 1.67393042 | 0.105 | 0.017 | 9.03418E-29 | KO | Ii27       | 0.088 |
| Mertk      | 3.00856E-33 | 0.82056956 | 0.326 | 0.128 | 9.34247E-29 | KO | Mertk      | 0.198 |
| Lsr        | 3.31537E-33 | 0.9295516  | 0.135 | 0.028 | 1.02952E-28 | KO | Lsr        | 0.107 |
| Rnf6       | 3.39173E-33 | 0.75344214 | 0.242 | 0.08  | 1.05323E-28 | KO | Rnf6       | 0.162 |
| Btk        | 3.40747E-33 | 0.92340517 | 0.263 | 0.091 | 1.05812E-28 | KO | Btk        | 0.172 |
| Wfs1       | 3.49476E-33 | 2.08119476 | 0.095 | 0.014 | 1.08523E-28 | KO | Wfs1       | 0.081 |
| Smarca5    | 3.91241E-33 | 0.7561677  | 0.459 | 0.214 | 1.21492E-28 | KO | Smarca5    | 0.245 |
| Sik3       | 3.93849E-33 | 0.85484326 | 0.223 | 0.07  | 1.22302E-28 | KO | Sik3       | 0.153 |
| Rell1      | 4.09296E-33 | 1.05883294 | 0.258 | 0.09  | 1.27099E-28 | KO | Rell1      | 0.168 |
| Tnrc6b     | 4.85069E-33 | 0.9984073  | 0.256 | 0.089 | 1.50628E-28 | KO | Tnrc6b     | 0.167 |
| Colgalt1   | 5.05099E-33 | 0.89192033 | 0.487 | 0.242 | 1.56848E-28 | KO | Colgalt1   | 0.245 |
| Nab1       | 5.10109E-33 | 0.79954379 | 0.322 | 0.127 | 1.58404E-28 | KO | Nab1       | 0.195 |
| Rnf5       | 5.12941E-33 | 1.13230978 | 0.176 | 0.047 | 1.59283E-28 | KO | Rnf5       | 0.129 |
| Ago2       | 5.93855E-33 | 0.71927802 | 0.49  | 0.236 | 1.8441E-28  | KO | Ago2       | 0.254 |
| Ccl8       | 6.19102E-33 | 1.75145098 | 0.701 | 0.494 | 1.9225E-28  | KO | Ccl8       | 0.207 |
| P2ry14     | 6.67194E-33 | 0.95094755 | 0.256 | 0.09  | 2.07184E-28 | KO | P2ry14     | 0.166 |
| Zbtb21     | 8.15537E-33 | 1.20947315 | 0.15  | 0.035 | 2.53249E-28 | KO | Zbtb21     | 0.115 |
| Camkk2     | 1.03147E-32 | 1.24027238 | 0.226 | 0.074 | 3.20301E-28 | KO | Camkk2     | 0.152 |
| Lrmp       | 1.12857E-32 | 0.81941055 | 0.278 | 0.101 | 3.50456E-28 | KO | Lrmp       | 0.177 |
| Cpeb4      | 1.22683E-32 | 0.80711946 | 0.338 | 0.137 | 3.80969E-28 | KO | Cpeb4      | 0.201 |
| Arl5a      | 1.42597E-32 | 0.71262226 | 0.314 | 0.121 | 4.42806E-28 | KO | Arl5a      | 0.193 |
| Baz2a      | 1.57256E-32 | 0.74074756 | 0.256 | 0.089 | 4.88328E-28 | KO | Baz2a      | 0.167 |
| Far1       | 1.62682E-32 | 0.79045641 | 0.311 | 0.12  | 5.05177E-28 | KO | Far1       | 0.191 |
| Rras2      | 1.9153E-32  | 1.85085093 | 0.083 | 0.01  | 5.94757E-28 | KO | Rras2      | 0.073 |
| Helz2      | 2.01826E-32 | 1.19672169 | 0.126 | 0.025 | 6.26729E-28 | KO | Helz2      | 0.101 |
| Papss2     | 2.09129E-32 | 1.44675672 | 0.097 | 0.015 | 6.49409E-28 | KO | Papss2     | 0.082 |
| Ptgs2os2   | 2.2836E-32  | 1.72728719 | 0.075 | 0.008 | 7.09126E-28 | KO | Ptgs2os2   | 0.067 |
| Rara       | 2.35901E-32 | 0.88850832 | 0.288 | 0.108 | 7.32544E-28 | KO | Rara       | 0.18  |
| Pim3       | 2.54766E-32 | 0.82956915 | 0.272 | 0.1   | 7.91124E-28 | KO | Pim3       | 0.172 |
| Clasp2     | 2.78671E-32 | 0.80011195 | 0.267 | 0.095 | 8.65356E-28 | KO | Clasp2     | 0.172 |
| Frrs1      | 2.81489E-32 | 0.74738297 | 0.292 | 0.109 | 8.74108E-28 | KO | Frrs1      | 0.183 |
| Tmem229b   | 2.82595E-32 | 0.99972533 | 0.139 | 0.031 | 8.77542E-28 | KO | Tmem229b   | 0.108 |
| Ankrd11    | 2.93896E-32 | 0.87455135 | 0.459 | 0.218 | 9.12635E-28 | KO | Ankrd11    | 0.241 |
| Svil       | 2.99386E-32 | 0.93992847 | 0.203 | 0.062 | 9.29683E-28 | KO | Svil       | 0.141 |
| Enox2      | 3.02541E-32 | 1.39594778 | 0.159 | 0.041 | 9.3948E-28  | KO | Enox2      | 0.118 |
| Cep120     | 3.08543E-32 | 0.87180405 | 0.154 | 0.037 | 9.58118E-28 | KO | Cep120     | 0.117 |
| Dhdh       | 3.13569E-32 | 1.37011248 | 0.115 | 0.021 | 9.73724E-28 | KO | Dhdh       | 0.094 |
| Jup        | 4.08151E-32 | 1.09971594 | 0.128 | 0.027 | 1.26743E-27 | KO | Jup        | 0.101 |
| Baiap2     | 4.97555E-32 | 0.96530064 | 0.276 | 0.103 | 1.54506E-27 | KO | Baiap2     | 0.173 |
| Sirpb1c    | 4.99577E-32 | 0.81167525 | 0.372 | 0.164 | 1.55134E-27 | KO | Sirpb1c    | 0.208 |
| Dennd4b    | 5.51629E-32 | 0.79135878 | 0.254 | 0.089 | 1.71297E-27 | KO | Dennd4b    | 0.165 |
| St6galnac6 | 5.7957E-32  | 0.79349391 | 0.183 | 0.052 | 1.79974E-27 | KO | St6galnac6 | 0.131 |
| Secisbp2l  | 5.87753E-32 | 0.96531257 | 0.267 | 0.097 | 1.82515E-27 | KO | Secisbp2l  | 0.17  |
| Smarcc2    | 6.20902E-32 | 0.85101418 | 0.286 | 0.106 | 1.92809E-27 | KO | Smarcc2    | 0.18  |
| Ppfibp2    | 6.9803E-32  | 1.29573149 | 0.127 | 0.027 | 2.16759E-27 | KO | Ppfibp2    | 0.1   |
| Aldh3b1    | 7.07029E-32 | 0.69646501 | 0.389 | 0.17  | 2.19554E-27 | KO | Aldh3b1    | 0.219 |
| Carmil2    | 8.17053E-32 | 3.23400356 | 0.048 | 0.001 | 2.5372E-27  | KO | Carmil2    | 0.047 |
| Tyk2       | 9.23448E-32 | 0.69378947 | 0.195 | 0.058 | 2.86758E-27 | KO | Tyk2       | 0.137 |
| Bod1l      | 1.0767E-31  | 0.80619701 | 0.284 | 0.106 | 3.34349E-27 | KO | Bod1l      | 0.178 |
| Tbc1d13    | 1.09994E-31 | 0.70337612 | 0.226 | 0.073 | 3.41564E-27 | KO | Tbc1d13    | 0.153 |

|             |             |            |       |       |             |    |             |       |
|-------------|-------------|------------|-------|-------|-------------|----|-------------|-------|
| Rps6ka3     | 1.11306E-31 | 0.78126688 | 0.34  | 0.14  | 3.45638E-27 | KO | Rps6ka3     | 0.2   |
| Gm36161     | 1.2275E-31  | 1.52685083 | 0.085 | 0.011 | 3.81176E-27 | KO | Gm36161     | 0.074 |
| Ly6i        | 1.29788E-31 | 2.92035691 | 0.077 | 0.009 | 4.0303E-27  | KO | Ly6i        | 0.068 |
| Il1rl1      | 1.4373E-31  | 2.86223617 | 0.051 | 0.002 | 4.46324E-27 | KO | Il1rl1      | 0.049 |
| Dip2b       | 1.60198E-31 | 0.75782864 | 0.271 | 0.098 | 4.97464E-27 | KO | Dip2b       | 0.173 |
| Sulf2       | 1.65646E-31 | 1.34269298 | 0.21  | 0.068 | 5.14381E-27 | KO | Sulf2       | 0.142 |
| Uggt1       | 1.69696E-31 | 0.84933656 | 0.248 | 0.087 | 5.26958E-27 | KO | Uggt1       | 0.161 |
| Matk        | 2.33497E-31 | 1.2084799  | 0.156 | 0.04  | 7.25078E-27 | KO | Matk        | 0.116 |
| Csnk2a1     | 2.33904E-31 | 0.98730652 | 0.271 | 0.1   | 7.26341E-27 | KO | Csnk2a1     | 0.171 |
| C1ra        | 2.36404E-31 | 1.54555643 | 0.135 | 0.03  | 7.34106E-27 | KO | C1ra        | 0.105 |
| Mapkapk5    | 2.42038E-31 | 1.59677207 | 0.084 | 0.011 | 7.51602E-27 | KO | Mapkapk5    | 0.073 |
| Sell        | 2.79158E-31 | 1.56094638 | 0.113 | 0.022 | 8.66871E-27 | KO | Sell        | 0.091 |
| Actn4       | 3.0869E-31  | 0.83568865 | 0.55  | 0.292 | 9.58576E-27 | KO | Actn4       | 0.258 |
| Manba       | 3.1626E-31  | 1.0911166  | 0.164 | 0.044 | 9.82084E-27 | KO | Manba       | 0.12  |
| Opa3        | 3.54683E-31 | 0.90582633 | 0.15  | 0.037 | 1.1014E-26  | KO | Opa3        | 0.113 |
| Gapvd1      | 4.43424E-31 | 0.73261039 | 0.409 | 0.185 | 1.37697E-26 | KO | Gapvd1      | 0.224 |
| Ttyh2       | 4.601E-31   | 1.04289267 | 0.18  | 0.052 | 1.42875E-26 | KO | Ttyh2       | 0.128 |
| Oas1a       | 4.70378E-31 | 0.79144955 | 0.214 | 0.068 | 1.46067E-26 | KO | Oas1a       | 0.146 |
| Tiam1       | 5.03347E-31 | 1.21021684 | 0.162 | 0.043 | 1.56304E-26 | KO | Tiam1       | 0.119 |
| Vps13c      | 5.83961E-31 | 1.03450064 | 0.25  | 0.089 | 1.81337E-26 | KO | Vps13c      | 0.161 |
| Cul2        | 6.10437E-31 | 1.12028337 | 0.188 | 0.056 | 1.89559E-26 | KO | Cul2        | 0.132 |
| Isy1        | 6.16805E-31 | 1.05613792 | 0.258 | 0.094 | 1.91536E-26 | KO | Isy1        | 0.164 |
| Zufsp       | 6.41478E-31 | 0.86809302 | 0.208 | 0.066 | 1.99198E-26 | KO | Zufsp       | 0.142 |
| Serpinb9    | 7.56619E-31 | 1.75258272 | 0.119 | 0.024 | 2.34953E-26 | KO | Serpinb9    | 0.095 |
| Dennd6a     | 7.58785E-31 | 1.11474373 | 0.194 | 0.059 | 2.35625E-26 | KO | Dennd6a     | 0.135 |
| Pik3r5      | 7.81363E-31 | 0.69466062 | 0.379 | 0.166 | 2.42637E-26 | KO | Pik3r5      | 0.213 |
| Apba1       | 7.9337E-31  | 1.78040102 | 0.073 | 0.008 | 2.46365E-26 | KO | Apba1       | 0.065 |
| Dok2        | 8.75974E-31 | 0.91098025 | 0.481 | 0.248 | 2.72016E-26 | KO | Dok2        | 0.233 |
| Zdhhc21     | 9.21164E-31 | 0.72598778 | 0.232 | 0.079 | 2.86049E-26 | KO | Zdhhc21     | 0.153 |
| Irf2bp2     | 9.41931E-31 | 0.69960698 | 0.712 | 0.446 | 2.92498E-26 | KO | Irf2bp2     | 0.266 |
| Il11ra1     | 9.77434E-31 | 1.0312776  | 0.284 | 0.111 | 3.03523E-26 | KO | Il11ra1     | 0.173 |
| Abcg3       | 1.01317E-30 | 1.42733697 | 0.134 | 0.03  | 3.14618E-26 | KO | Abcg3       | 0.104 |
| Ppp4c       | 1.09318E-30 | 0.7072819  | 0.433 | 0.197 | 3.39464E-26 | KO | Ppp4c       | 0.236 |
| Arhgef1     | 1.11154E-30 | 0.7605725  | 0.377 | 0.164 | 3.45166E-26 | KO | Arhgef1     | 0.213 |
| Cox7a2l     | 1.24657E-30 | 0.70325019 | 0.717 | 0.454 | 3.87097E-26 | KO | Cox7a2l     | 0.263 |
| Ephx1       | 1.34835E-30 | 1.9940493  | 0.096 | 0.016 | 4.18703E-26 | KO | Ephx1       | 0.08  |
| Tex2        | 1.3555E-30  | 0.74930313 | 0.182 | 0.052 | 4.20924E-26 | KO | Tex2        | 0.13  |
| Stk10       | 1.39216E-30 | 1.16670553 | 0.147 | 0.036 | 4.32307E-26 | KO | Stk10       | 0.111 |
| Slc11a2     | 1.41075E-30 | 1.18776982 | 0.208 | 0.068 | 4.3808E-26  | KO | Slc11a2     | 0.14  |
| Cited2      | 1.47987E-30 | 0.96756813 | 0.489 | 0.256 | 4.59544E-26 | KO | Cited2      | 0.233 |
| Epb411l     | 1.65942E-30 | 1.53964801 | 0.171 | 0.048 | 5.153E-26   | KO | Epb411l     | 0.123 |
| Hsd17b4     | 1.70038E-30 | 0.95603928 | 0.256 | 0.092 | 5.28019E-26 | KO | Hsd17b4     | 0.164 |
| Mov10       | 2.11281E-30 | 0.78562518 | 0.115 | 0.023 | 6.5609E-26  | KO | Mov10       | 0.092 |
| Fxr1        | 2.18759E-30 | 0.69960186 | 0.382 | 0.165 | 6.79311E-26 | KO | Fxr1        | 0.217 |
| Vps37c      | 2.42738E-30 | 1.14996222 | 0.103 | 0.018 | 7.53774E-26 | KO | Vps37c      | 0.085 |
| Slc38a1     | 2.49131E-30 | 0.81278419 | 0.355 | 0.154 | 7.73625E-26 | KO | Slc38a1     | 0.201 |
| Tspan14     | 2.50062E-30 | 0.73330158 | 0.316 | 0.127 | 7.76518E-26 | KO | Tspan14     | 0.189 |
| Sdha        | 2.62082E-30 | 0.71348714 | 0.522 | 0.27  | 8.13842E-26 | KO | Sdha        | 0.252 |
| D16Ertd472e | 2.85691E-30 | 1.83267476 | 0.116 | 0.024 | 8.87157E-26 | KO | D16Ertd472e | 0.092 |
| Bsdc1       | 3.2889E-30  | 0.83364163 | 0.17  | 0.047 | 1.0213E-25  | KO | Bsdc1       | 0.123 |
| Arpc4       | 3.72346E-30 | 0.76488236 | 0.71  | 0.432 | 1.15625E-25 | KO | Arpc4       | 0.278 |
| Smim24      | 3.89234E-30 | 1.16879976 | 0.1   | 0.017 | 1.20869E-25 | KO | Smim24      | 0.083 |
| Lpar1       | 4.09118E-30 | 2.1629263  | 0.068 | 0.007 | 1.27043E-25 | KO | Lpar1       | 0.061 |
| Igfbp1      | 4.14509E-30 | 0.84228761 | 0.383 | 0.17  | 1.28718E-25 | KO | Igfbp1      | 0.213 |

|             |             |            |       |       |             |    |            |       |
|-------------|-------------|------------|-------|-------|-------------|----|------------|-------|
| C6          | 5.45885E-30 | 4.69564968 | 0.039 | 0     | 1.69514E-25 | KO | C6         | 0.039 |
| Taz         | 5.51298E-30 | 1.26735647 | 0.211 | 0.07  | 1.71195E-25 | KO | Taz        | 0.141 |
| Eif1a       | 5.54384E-30 | 0.80360899 | 0.498 | 0.252 | 1.72153E-25 | KO | Eif1a      | 0.246 |
| Bcl3        | 5.57894E-30 | 1.04136963 | 0.215 | 0.072 | 1.73243E-25 | KO | Bcl3       | 0.143 |
| Acbd5       | 6.98493E-30 | 0.87169879 | 0.235 | 0.083 | 2.16903E-25 | KO | Acbd5      | 0.152 |
| Rinl        | 7.73353E-30 | 1.2468572  | 0.159 | 0.043 | 2.40149E-25 | KO | Rinl       | 0.116 |
| Tmem2       | 7.82396E-30 | 1.3556636  | 0.21  | 0.07  | 2.42957E-25 | KO | Tmem2      | 0.14  |
| Nsmaf       | 7.98143E-30 | 1.46128743 | 0.144 | 0.036 | 2.47847E-25 | KO | Nsmaf      | 0.108 |
| Ccr5        | 9.14727E-30 | 0.74713916 | 0.702 | 0.463 | 2.8405E-25  | KO | Ccr5       | 0.239 |
| Spata2      | 9.15892E-30 | 1.5777885  | 0.135 | 0.032 | 2.84412E-25 | KO | Spata2     | 0.103 |
| Adgre1      | 1.17337E-29 | 0.73313977 | 0.682 | 0.442 | 3.64367E-25 | KO | Adgre1     | 0.24  |
| Stk38l      | 1.22427E-29 | 1.57284545 | 0.112 | 0.022 | 3.80173E-25 | KO | Stk38l     | 0.09  |
| Dpf2        | 1.22705E-29 | 0.81562064 | 0.246 | 0.088 | 3.81035E-25 | KO | Dpf2       | 0.158 |
| Slc39a2     | 1.36428E-29 | 2.25560722 | 0.055 | 0.003 | 4.23649E-25 | KO | Slc39a2    | 0.052 |
| Eid3        | 1.5654E-29  | 2.64219158 | 0.053 | 0.003 | 4.86105E-25 | KO | Eid3       | 0.05  |
| Ebi3        | 1.62681E-29 | 1.08794621 | 0.178 | 0.052 | 5.05173E-25 | KO | Ebi3       | 0.126 |
| Dync1li1    | 1.7851E-29  | 1.0086004  | 0.279 | 0.108 | 5.54329E-25 | KO | Dync1li1   | 0.171 |
| Kmt2d       | 1.79603E-29 | 1.03886987 | 0.214 | 0.071 | 5.5772E-25  | KO | Kmt2d      | 0.143 |
| AW112010    | 1.89929E-29 | 1.09964728 | 0.688 | 0.513 | 5.89787E-25 | KO | AW112010   | 0.175 |
| Rab12       | 2.04416E-29 | 0.8554631  | 0.286 | 0.112 | 6.34775E-25 | KO | Rab12      | 0.174 |
| Batf3       | 2.11649E-29 | 1.11488829 | 0.294 | 0.121 | 6.57233E-25 | KO | Batf3      | 0.173 |
| 4931406C07R | 2.25981E-29 | 0.97123018 | 0.187 | 0.057 | 7.0174E-25  | KO | 4931406C07 | 0.13  |
| Olfr1167    | 2.66943E-29 | 3.14979864 | 0.041 | 0.001 | 8.28939E-25 | KO | Olfr1167   | 0.04  |
| Irak4       | 2.84551E-29 | 1.15134378 | 0.203 | 0.066 | 8.83617E-25 | KO | Irak4      | 0.137 |
| Bhlhe40     | 2.96348E-29 | 0.72167819 | 0.435 | 0.216 | 9.2025E-25  | KO | Bhlhe40    | 0.219 |
| Plcl2       | 3.01742E-29 | 0.75654825 | 0.176 | 0.052 | 9.37E-25    | KO | Plcl2      | 0.124 |
| Sbno2       | 3.25362E-29 | 0.82699691 | 0.435 | 0.208 | 1.01035E-24 | KO | Sbno2      | 0.227 |
| Zfp800      | 3.71796E-29 | 1.24069628 | 0.188 | 0.059 | 1.15454E-24 | KO | Zfp800     | 0.129 |
| Ccdc88a     | 3.79853E-29 | 0.80301088 | 0.271 | 0.105 | 1.17956E-24 | KO | Ccdc88a    | 0.166 |
| Fchsd2      | 3.89962E-29 | 1.51112664 | 0.148 | 0.039 | 1.21095E-24 | KO | Fchsd2     | 0.109 |
| Tial1       | 3.9536E-29  | 0.80631668 | 0.378 | 0.169 | 1.22771E-24 | KO | Tial1      | 0.209 |
| Cacna1a     | 4.25278E-29 | 2.93727301 | 0.059 | 0.005 | 1.32062E-24 | KO | Cacna1a    | 0.054 |
| Rbm27       | 4.42098E-29 | 0.83164352 | 0.222 | 0.076 | 1.37285E-24 | KO | Rbm27      | 0.146 |
| H2-DMb2     | 5.0913E-29  | 2.06919713 | 0.088 | 0.014 | 1.581E-24   | KO | H2-DMb2    | 0.074 |
| G3bp2       | 5.8043E-29  | 0.72442785 | 0.474 | 0.236 | 1.80241E-24 | KO | G3bp2      | 0.238 |
| Mllt6       | 5.99951E-29 | 0.9327548  | 0.184 | 0.056 | 1.86303E-24 | KO | Mllt6      | 0.128 |
| Cdk5rap1    | 6.17655E-29 | 1.43192125 | 0.089 | 0.014 | 1.918E-24   | KO | Cdk5rap1   | 0.075 |
| Ids         | 6.49544E-29 | 1.1788895  | 0.235 | 0.085 | 2.01703E-24 | KO | Ids        | 0.15  |
| Cbfa2t3     | 6.60556E-29 | 1.88011942 | 0.095 | 0.016 | 2.05122E-24 | KO | Cbfa2t3    | 0.079 |
| Myh10       | 6.76141E-29 | 1.80117427 | 0.084 | 0.012 | 2.09962E-24 | KO | Myh10      | 0.072 |
| Lrrk2       | 6.91085E-29 | 1.88116259 | 0.064 | 0.006 | 2.14603E-24 | KO | Lrrk2      | 0.058 |
| Nedd9       | 6.92375E-29 | 1.06290562 | 0.143 | 0.036 | 2.15003E-24 | KO | Nedd9      | 0.107 |
| Eml4        | 7.04808E-29 | 0.91407427 | 0.226 | 0.078 | 2.18864E-24 | KO | Eml4       | 0.148 |
| Prpf18      | 7.15376E-29 | 0.8650159  | 0.19  | 0.059 | 2.22146E-24 | KO | Prpf18     | 0.131 |
| Akr1c13     | 7.20716E-29 | 1.51898519 | 0.16  | 0.045 | 2.23804E-24 | KO | Akr1c13    | 0.115 |
| Klc1        | 7.25402E-29 | 1.18507917 | 0.222 | 0.077 | 2.25259E-24 | KO | Klc1       | 0.145 |
| Slc7a11     | 8.42432E-29 | 1.24136103 | 0.164 | 0.047 | 2.616E-24   | KO | Slc7a11    | 0.117 |
| Ddx58       | 8.49124E-29 | 0.70967966 | 0.148 | 0.039 | 2.63678E-24 | KO | Ddx58      | 0.109 |
| Exoc6       | 8.97383E-29 | 1.25262188 | 0.127 | 0.029 | 2.78664E-24 | KO | Exoc6      | 0.098 |
| Dpp4        | 9.03911E-29 | 2.85067057 | 0.045 | 0.002 | 2.80691E-24 | KO | Dpp4       | 0.043 |
| Tm9sf2      | 1.20817E-28 | 0.7264304  | 0.358 | 0.155 | 3.75172E-24 | KO | Tm9sf2     | 0.203 |
| Kmt2a       | 1.39665E-28 | 0.7693625  | 0.226 | 0.079 | 4.337E-24   | KO | Kmt2a      | 0.147 |
| Crtc3       | 1.53601E-28 | 0.73045695 | 0.255 | 0.096 | 4.76978E-24 | KO | Crtc3      | 0.159 |
| Smim27      | 1.57948E-28 | 0.85953799 | 0.19  | 0.059 | 4.90476E-24 | KO | Smim27     | 0.131 |

|             |             |            |       |       |             |    |            |       |
|-------------|-------------|------------|-------|-------|-------------|----|------------|-------|
| Tor1b       | 1.94741E-28 | 1.09259671 | 0.218 | 0.075 | 6.04729E-24 | KO | Tor1b      | 0.143 |
| Gbbp1       | 2.01885E-28 | 0.69723644 | 0.385 | 0.173 | 6.26913E-24 | KO | Gbbp1      | 0.212 |
| Mta2        | 2.02974E-28 | 0.86852771 | 0.212 | 0.072 | 6.30294E-24 | KO | Mta2       | 0.14  |
| Pdlim5      | 2.41059E-28 | 0.75167627 | 0.312 | 0.131 | 7.4856E-24  | KO | Pdlim5     | 0.181 |
| Map2k7      | 2.50587E-28 | 0.82739773 | 0.243 | 0.088 | 7.78147E-24 | KO | Map2k7     | 0.155 |
| 2310040G24F | 2.5567E-28  | 1.23933172 | 0.097 | 0.017 | 7.93931E-24 | KO | 2310040G24 | 0.08  |
| Gm19951     | 2.86859E-28 | 1.73976914 | 0.124 | 0.029 | 8.90785E-24 | KO | Gm19951    | 0.095 |
| Parp4       | 3.66647E-28 | 1.02606256 | 0.195 | 0.063 | 1.13855E-23 | KO | Parp4      | 0.132 |
| Cdk19       | 4.27556E-28 | 0.94076492 | 0.188 | 0.06  | 1.32769E-23 | KO | Cdk19      | 0.128 |
| Pld3        | 4.36066E-28 | 0.95664183 | 0.57  | 0.357 | 1.35411E-23 | KO | Pld3       | 0.213 |
| Pabpn1      | 4.36255E-28 | 1.19086107 | 0.158 | 0.045 | 1.3547E-23  | KO | Pabpn1     | 0.113 |
| Nck1        | 4.72013E-28 | 0.83921482 | 0.151 | 0.041 | 1.46574E-23 | KO | Nck1       | 0.11  |
| Fbxo4       | 5.10856E-28 | 1.13262164 | 0.175 | 0.053 | 1.58636E-23 | KO | Fbxo4      | 0.122 |
| Hmgcr       | 5.19042E-28 | 0.86232558 | 0.216 | 0.075 | 1.61178E-23 | KO | Hmgcr      | 0.141 |
| Uba7        | 5.77755E-28 | 0.76721733 | 0.192 | 0.062 | 1.7941E-23  | KO | Uba7       | 0.13  |
| Zdhhc5      | 5.79177E-28 | 0.75854417 | 0.235 | 0.084 | 1.79852E-23 | KO | Zdhhc5     | 0.151 |
| Rnf44       | 5.95413E-28 | 0.97589639 | 0.196 | 0.064 | 1.84893E-23 | KO | Rnf44      | 0.132 |
| Paxbp1      | 6.30118E-28 | 0.90729792 | 0.238 | 0.087 | 1.95671E-23 | KO | Paxbp1     | 0.151 |
| Zfp710      | 7.19177E-28 | 0.85127109 | 0.176 | 0.054 | 2.23326E-23 | KO | Zfp710     | 0.122 |
| Gnl1        | 7.84509E-28 | 0.83487452 | 0.29  | 0.118 | 2.43614E-23 | KO | Gnl1       | 0.172 |
| Ptpn11      | 8.22336E-28 | 0.73163476 | 0.254 | 0.096 | 2.5536E-23  | KO | Ptpn11     | 0.158 |
| Orai1       | 8.61701E-28 | 0.70003137 | 0.314 | 0.132 | 2.67584E-23 | KO | Orai1      | 0.182 |
| Cwc25       | 1.15405E-27 | 0.84316287 | 0.188 | 0.06  | 3.58368E-23 | KO | Cwc25      | 0.128 |
| Sec16a      | 1.16456E-27 | 0.73173264 | 0.184 | 0.058 | 3.6163E-23  | KO | Sec16a     | 0.126 |
| Slc2a6      | 1.22809E-27 | 2.01232657 | 0.075 | 0.01  | 3.8136E-23  | KO | Slc2a6     | 0.065 |
| Tmem26      | 1.29028E-27 | 2.25098805 | 0.081 | 0.012 | 4.0067E-23  | KO | Tmem26     | 0.069 |
| Tuba1c      | 1.56568E-27 | 0.7144965  | 0.533 | 0.279 | 4.8619E-23  | KO | Tuba1c     | 0.254 |
| Hadhb       | 1.57176E-27 | 0.76654404 | 0.389 | 0.178 | 4.88079E-23 | KO | Hadhb      | 0.211 |
| Cox16       | 1.634E-27   | 0.72635784 | 0.178 | 0.054 | 5.07406E-23 | KO | Cox16      | 0.124 |
| Zcchc24     | 2.07481E-27 | 0.93466708 | 0.23  | 0.084 | 6.44292E-23 | KO | Zcchc24    | 0.146 |
| Copz1       | 2.29502E-27 | 0.77234322 | 0.506 | 0.266 | 7.12674E-23 | KO | Copz1      | 0.24  |
| Insig1      | 2.49105E-27 | 0.87450684 | 0.208 | 0.071 | 7.73546E-23 | KO | Insig1     | 0.137 |
| Agpat4      | 2.51643E-27 | 0.84150529 | 0.228 | 0.082 | 7.81427E-23 | KO | Agpat4     | 0.146 |
| Cd69        | 2.96188E-27 | 1.90040112 | 0.092 | 0.016 | 9.19752E-23 | KO | Cd69       | 0.076 |
| 2810403A07R | 3.03072E-27 | 0.8483991  | 0.203 | 0.07  | 9.4113E-23  | KO | 2810403A07 | 0.133 |
| Il2rb       | 3.08965E-27 | 2.44993253 | 0.077 | 0.011 | 9.59428E-23 | KO | Il2rb      | 0.066 |
| Retreg1     | 3.49604E-27 | 0.82846042 | 0.207 | 0.07  | 1.08563E-22 | KO | Retreg1    | 0.137 |
| Polr2l      | 4.19314E-27 | 0.76853864 | 0.315 | 0.136 | 1.3021E-22  | KO | Polr2l     | 0.179 |
| Snx27       | 4.26132E-27 | 0.84740353 | 0.248 | 0.094 | 1.32327E-22 | KO | Snx27      | 0.154 |
| Chd3        | 4.61447E-27 | 0.94767794 | 0.216 | 0.077 | 1.43293E-22 | KO | Chd3       | 0.139 |
| Dclre1c     | 4.61694E-27 | 1.01903242 | 0.167 | 0.05  | 1.4337E-22  | KO | Dclre1c    | 0.117 |
| Phf1        | 4.8556E-27  | 1.39195973 | 0.096 | 0.018 | 1.50781E-22 | KO | Phf1       | 0.078 |
| Ahnak2      | 5.30485E-27 | 0.79720606 | 0.178 | 0.056 | 1.64732E-22 | KO | Ahnak2     | 0.122 |
| Aida        | 5.62758E-27 | 0.75885866 | 0.284 | 0.116 | 1.74753E-22 | KO | Aida       | 0.168 |
| Eya3        | 5.97962E-27 | 1.10368694 | 0.126 | 0.03  | 1.85685E-22 | KO | Eya3       | 0.096 |
| Parp10      | 6.42429E-27 | 0.84736123 | 0.179 | 0.057 | 1.99494E-22 | KO | Parp10     | 0.122 |
| Tnfaip6     | 6.42527E-27 | 1.59595937 | 0.064 | 0.007 | 1.99524E-22 | KO | Tnfaip6    | 0.057 |
| Chordc1     | 6.50988E-27 | 0.73931861 | 0.191 | 0.062 | 2.02151E-22 | KO | Chordc1    | 0.129 |
| Ccl6        | 6.88506E-27 | 0.96672132 | 0.808 | 0.613 | 2.13802E-22 | KO | Ccl6       | 0.195 |
| Tmem140     | 7.28634E-27 | 0.88114246 | 0.19  | 0.062 | 2.26263E-22 | KO | Tmem140    | 0.128 |
| Slc25a20    | 8.8125E-27  | 1.00690067 | 0.143 | 0.039 | 2.73655E-22 | KO | Slc25a20   | 0.104 |
| Cyp4f16     | 9.3294E-27  | 0.8283553  | 0.184 | 0.06  | 2.89706E-22 | KO | Cyp4f16    | 0.124 |
| Trim26      | 9.7015E-27  | 0.74082332 | 0.224 | 0.082 | 3.01261E-22 | KO | Trim26     | 0.142 |
| Araf        | 9.84783E-27 | 0.8211107  | 0.254 | 0.098 | 3.05805E-22 | KO | Araf       | 0.156 |

|          |             |            |       |       |             |    |          |       |
|----------|-------------|------------|-------|-------|-------------|----|----------|-------|
| Ube3b    | 1.05611E-26 | 0.86873096 | 0.199 | 0.067 | 3.27953E-22 | KO | Ube3b    | 0.132 |
| Senp6    | 1.13922E-26 | 0.76476648 | 0.251 | 0.096 | 3.53763E-22 | KO | Senp6    | 0.155 |
| Tlk2     | 1.21882E-26 | 0.74213249 | 0.192 | 0.063 | 3.7848E-22  | KO | Tlk2     | 0.129 |
| Fam219a  | 1.27848E-26 | 1.04160824 | 0.151 | 0.042 | 3.97007E-22 | KO | Fam219a  | 0.109 |
| Cyp4f13  | 1.34045E-26 | 0.83163938 | 0.159 | 0.046 | 4.16249E-22 | KO | Cyp4f13  | 0.113 |
| Selenop  | 1.47429E-26 | 1.17616538 | 0.774 | 0.586 | 4.5781E-22  | KO | Selenop  | 0.188 |
| Fbxl3    | 1.4975E-26  | 0.82917041 | 0.244 | 0.093 | 4.65019E-22 | KO | Fbxl3    | 0.151 |
| Trbc1    | 1.62465E-26 | 2.53513889 | 0.068 | 0.008 | 5.04504E-22 | KO | Trbc1    | 0.06  |
| Pml      | 1.77715E-26 | 1.1641377  | 0.156 | 0.046 | 5.51858E-22 | KO | Pml      | 0.11  |
| Eepd1    | 1.91786E-26 | 0.88162024 | 0.182 | 0.059 | 5.95553E-22 | KO | Eepd1    | 0.123 |
| Gpnmb    | 1.94882E-26 | 1.73881074 | 0.583 | 0.438 | 6.05167E-22 | KO | Gpnmb    | 0.145 |
| Fgfr1    | 2.10146E-26 | 2.46816118 | 0.067 | 0.008 | 6.52565E-22 | KO | Fgfr1    | 0.059 |
| Mgll     | 2.19189E-26 | 1.73207962 | 0.115 | 0.027 | 6.80647E-22 | KO | Mgll     | 0.088 |
| Procr    | 2.21277E-26 | 1.96511806 | 0.076 | 0.011 | 6.87131E-22 | KO | Procr    | 0.065 |
| Spata13  | 2.2183E-26  | 1.25519375 | 0.119 | 0.028 | 6.88849E-22 | KO | Spata13  | 0.091 |
| Errfi1   | 2.25225E-26 | 0.90754004 | 0.332 | 0.157 | 6.9939E-22  | KO | Errfi1   | 0.175 |
| Clec9a   | 2.2798E-26  | 2.53451985 | 0.037 | 0.001 | 7.07947E-22 | KO | Clec9a   | 0.036 |
| Bdp1     | 2.49797E-26 | 0.82301563 | 0.2   | 0.069 | 7.75694E-22 | KO | Bdp1     | 0.131 |
| Tsga10   | 2.86375E-26 | 1.33799995 | 0.076 | 0.011 | 8.89281E-22 | KO | Tsga10   | 0.065 |
| Synrg    | 3.42407E-26 | 1.03583541 | 0.163 | 0.049 | 1.06328E-21 | KO | Synrg    | 0.114 |
| Hs6st1   | 3.57383E-26 | 0.78761779 | 0.226 | 0.083 | 1.10978E-21 | KO | Hs6st1   | 0.143 |
| Cd209f   | 3.57464E-26 | 4.42544849 | 0.039 | 0.001 | 1.11003E-21 | KO | Cd209f   | 0.038 |
| Cs       | 3.75647E-26 | 0.70369263 | 0.407 | 0.198 | 1.1665E-21  | KO | Cs       | 0.209 |
| Map4     | 3.92836E-26 | 0.881327   | 0.3   | 0.127 | 1.21987E-21 | KO | Map4     | 0.173 |
| Uba6     | 4.07779E-26 | 1.05509232 | 0.184 | 0.061 | 1.26628E-21 | KO | Uba6     | 0.123 |
| Ripk1    | 4.53215E-26 | 0.70466125 | 0.29  | 0.12  | 1.40737E-21 | KO | Ripk1    | 0.17  |
| Vopp1    | 4.64627E-26 | 1.05382086 | 0.14  | 0.038 | 1.4428E-21  | KO | Vopp1    | 0.102 |
| Pik3r1   | 4.76758E-26 | 0.83503318 | 0.368 | 0.175 | 1.48048E-21 | KO | Pik3r1   | 0.193 |
| Tnrc6c   | 4.81232E-26 | 0.85772016 | 0.227 | 0.084 | 1.49437E-21 | KO | Tnrc6c   | 0.143 |
| Plekhg2  | 4.83583E-26 | 1.2813259  | 0.136 | 0.036 | 1.50167E-21 | KO | Plekhg2  | 0.1   |
| Fam46a   | 5.12697E-26 | 0.76727137 | 0.399 | 0.197 | 1.59208E-21 | KO | Fam46a   | 0.202 |
| Ythdf1   | 6.38811E-26 | 0.74030604 | 0.252 | 0.099 | 1.9837E-21  | KO | Ythdf1   | 0.153 |
| Tlr1     | 6.87463E-26 | 0.9205847  | 0.176 | 0.057 | 2.13478E-21 | KO | Tlr1     | 0.119 |
| Lars     | 7.4486E-26  | 0.81187387 | 0.247 | 0.096 | 2.31301E-21 | KO | Lars     | 0.151 |
| Pi4ka    | 8.60794E-26 | 0.74845541 | 0.238 | 0.091 | 2.67302E-21 | KO | Pi4ka    | 0.147 |
| Rffl     | 8.86841E-26 | 0.77469937 | 0.148 | 0.042 | 2.75391E-21 | KO | Rffl     | 0.106 |
| Arhgap19 | 9.83043E-26 | 0.84529869 | 0.255 | 0.103 | 3.05264E-21 | KO | Arhgap19 | 0.152 |
| Fyn      | 1.06407E-25 | 0.83231487 | 0.316 | 0.14  | 3.30427E-21 | KO | Fyn      | 0.176 |
| Dnajc1   | 1.19437E-25 | 0.76396793 | 0.234 | 0.089 | 3.70889E-21 | KO | Dnajc1   | 0.145 |
| Nt5dc3   | 1.2914E-25  | 1.39596273 | 0.105 | 0.023 | 4.01017E-21 | KO | Nt5dc3   | 0.082 |
| Lrp6     | 1.43714E-25 | 0.74407768 | 0.244 | 0.095 | 4.46274E-21 | KO | Lrp6     | 0.149 |
| Dlg1     | 1.45514E-25 | 0.71148756 | 0.175 | 0.056 | 4.51865E-21 | KO | Dlg1     | 0.119 |
| Gramd4   | 1.47531E-25 | 1.11569133 | 0.084 | 0.014 | 4.58129E-21 | KO | Gramd4   | 0.07  |
| Cdk17    | 1.61073E-25 | 0.95976312 | 0.187 | 0.063 | 5.00179E-21 | KO | Cdk17    | 0.124 |
| Taf1     | 1.77561E-25 | 0.90626854 | 0.207 | 0.074 | 5.5138E-21  | KO | Taf1     | 0.133 |
| Pctp     | 1.90828E-25 | 1.84969434 | 0.126 | 0.033 | 5.9258E-21  | KO | Pctp     | 0.093 |
| Gimap4   | 1.94705E-25 | 1.85437109 | 0.087 | 0.016 | 6.04618E-21 | KO | Gimap4   | 0.071 |
| Evi2     | 2.10311E-25 | 1.73821698 | 0.083 | 0.014 | 6.5308E-21  | KO | Evi2     | 0.069 |
| Trrap    | 2.11375E-25 | 0.79709837 | 0.188 | 0.064 | 6.56384E-21 | KO | Trrap    | 0.124 |
| Gm12185  | 2.16804E-25 | 2.25412935 | 0.036 | 0.001 | 6.73241E-21 | KO | Gm12185  | 0.035 |
| Pla2g4a  | 2.19465E-25 | 1.2337446  | 0.243 | 0.096 | 6.81506E-21 | KO | Pla2g4a  | 0.147 |
| Pptc7    | 2.51414E-25 | 1.1433363  | 0.117 | 0.029 | 7.80717E-21 | KO | Pptc7    | 0.088 |
| Vps54    | 2.70313E-25 | 0.93114002 | 0.198 | 0.069 | 8.39402E-21 | KO | Vps54    | 0.129 |
| Cyld     | 2.87176E-25 | 0.72523856 | 0.252 | 0.1   | 8.91769E-21 | KO | Cyld     | 0.152 |

|          |             |            |       |       |             |    |          |       |
|----------|-------------|------------|-------|-------|-------------|----|----------|-------|
| Clec4e   | 3.14724E-25 | 1.08873645 | 0.336 | 0.166 | 9.77314E-21 | KO | Clec4e   | 0.17  |
| Bcl2     | 3.1477E-25  | 0.94425292 | 0.139 | 0.039 | 9.77455E-21 | KO | Bcl2     | 0.1   |
| Slc26a2  | 4.11479E-25 | 0.85315947 | 0.178 | 0.058 | 1.27777E-20 | KO | Slc26a2  | 0.12  |
| Nipsnap2 | 4.17174E-25 | 0.82190298 | 0.178 | 0.058 | 1.29545E-20 | KO | Nipsnap2 | 0.12  |
| Cd209g   | 4.49049E-25 | 4.68393474 | 0.032 | 0     | 1.39443E-20 | KO | Cd209g   | 0.032 |
| Helz     | 4.52253E-25 | 1.09142466 | 0.135 | 0.037 | 1.40438E-20 | KO | Helz     | 0.098 |
| Abhd16a  | 4.6627E-25  | 0.71414443 | 0.268 | 0.112 | 1.44791E-20 | KO | Abhd16a  | 0.156 |
| Ctnnd1   | 4.77905E-25 | 0.77032768 | 0.274 | 0.114 | 1.48404E-20 | KO | Ctnnd1   | 0.16  |
| Thoc6    | 5.08012E-25 | 0.73833978 | 0.23  | 0.087 | 1.57753E-20 | KO | Thoc6    | 0.143 |
| Smim13   | 5.27091E-25 | 1.05188162 | 0.166 | 0.053 | 1.63677E-20 | KO | Smim13   | 0.113 |
| Hnrnph3  | 5.70918E-25 | 0.77903586 | 0.164 | 0.052 | 1.77287E-20 | KO | Hnrnph3  | 0.112 |
| H2-M2    | 6.15615E-25 | 3.70345049 | 0.044 | 0.002 | 1.91167E-20 | KO | H2-M2    | 0.042 |
| Nf2      | 7.35316E-25 | 0.90109103 | 0.14  | 0.039 | 2.28338E-20 | KO | Nf2      | 0.101 |
| Pqlc1    | 8.23802E-25 | 0.76523251 | 0.202 | 0.072 | 2.55815E-20 | KO | Pqlc1    | 0.13  |
| Numa1    | 8.24234E-25 | 0.71804557 | 0.274 | 0.113 | 2.55949E-20 | KO | Numa1    | 0.161 |
| Plscr1   | 8.89393E-25 | 1.1086181  | 0.176 | 0.059 | 2.76183E-20 | KO | Plscr1   | 0.117 |
| Pldc2    | 8.98783E-25 | 2.78996075 | 0.057 | 0.006 | 2.79099E-20 | KO | Pldc2    | 0.051 |
| Tmem50b  | 9.11351E-25 | 0.81900939 | 0.17  | 0.055 | 2.83002E-20 | KO | Tmem50b  | 0.115 |
| Reps2    | 9.25508E-25 | 2.21106974 | 0.075 | 0.012 | 2.87398E-20 | KO | Reps2    | 0.063 |
| Ccdc97   | 9.61052E-25 | 0.75481041 | 0.158 | 0.048 | 2.98436E-20 | KO | Ccdc97   | 0.11  |
| Ube2d1   | 1.06767E-24 | 0.76848686 | 0.171 | 0.056 | 3.31542E-20 | KO | Ube2d1   | 0.115 |
| Jak3     | 1.28936E-24 | 0.84472688 | 0.138 | 0.039 | 4.00386E-20 | KO | Jak3     | 0.099 |
| Thap2    | 1.38973E-24 | 1.31636005 | 0.116 | 0.029 | 4.31551E-20 | KO | Thap2    | 0.087 |
| Fbxo33   | 1.40858E-24 | 0.83707608 | 0.222 | 0.083 | 4.37406E-20 | KO | Fbxo33   | 0.139 |
| Gm35154  | 1.48011E-24 | 1.18944288 | 0.101 | 0.022 | 4.59618E-20 | KO | Gm35154  | 0.079 |
| Bag3     | 1.49378E-24 | 0.77163239 | 0.207 | 0.075 | 4.63865E-20 | KO | Bag3     | 0.132 |
| Idh1     | 1.58971E-24 | 0.77384171 | 0.37  | 0.178 | 4.93654E-20 | KO | Idh1     | 0.192 |
| Polr3gl  | 1.74317E-24 | 0.93309117 | 0.152 | 0.046 | 5.41307E-20 | KO | Polr3gl  | 0.106 |
| Gm26532  | 1.92159E-24 | 1.17696428 | 0.152 | 0.047 | 5.9671E-20  | KO | Gm26532  | 0.105 |
| Acadsb   | 1.93976E-24 | 1.04010682 | 0.15  | 0.045 | 6.02354E-20 | KO | Acadsb   | 0.105 |
| Rmdn3    | 1.97354E-24 | 0.72358287 | 0.139 | 0.039 | 6.12843E-20 | KO | Rmdn3    | 0.1   |
| Pak1     | 2.08007E-24 | 0.81419647 | 0.222 | 0.084 | 6.45923E-20 | KO | Pak1     | 0.138 |
| Arhgef6  | 2.62985E-24 | 0.71554089 | 0.279 | 0.119 | 8.16646E-20 | KO | Arhgef6  | 0.16  |
| Gimap3   | 2.87671E-24 | 3.13878689 | 0.048 | 0.004 | 8.93306E-20 | KO | Gimap3   | 0.044 |
| Calu     | 2.88613E-24 | 0.72975414 | 0.366 | 0.174 | 8.96231E-20 | KO | Calu     | 0.192 |
| Stim2    | 3.21298E-24 | 0.97334965 | 0.136 | 0.039 | 9.97727E-20 | KO | Stim2    | 0.097 |
| Lilra6   | 3.34325E-24 | 1.67591224 | 0.059 | 0.007 | 1.03818E-19 | KO | Lilra6   | 0.052 |
| Armc8    | 3.35891E-24 | 0.76609667 | 0.207 | 0.076 | 1.04304E-19 | KO | Armc8    | 0.131 |
| C5ar2    | 3.36485E-24 | 1.75981204 | 0.083 | 0.015 | 1.04489E-19 | KO | C5ar2    | 0.068 |
| Tmem131l | 3.37071E-24 | 0.81370288 | 0.148 | 0.044 | 1.04671E-19 | KO | Tmem131l | 0.104 |
| Rnft1    | 3.42709E-24 | 0.90983851 | 0.188 | 0.066 | 1.06421E-19 | KO | Rnft1    | 0.122 |
| Gse1     | 3.5371E-24  | 0.89269443 | 0.171 | 0.056 | 1.09838E-19 | KO | Gse1     | 0.115 |
| Cers5    | 3.60609E-24 | 0.70238763 | 0.191 | 0.068 | 1.1198E-19  | KO | Cers5    | 0.123 |
| Mlkl     | 3.63801E-24 | 0.86751767 | 0.172 | 0.057 | 1.12971E-19 | KO | Mlkl     | 0.115 |
| Arhgap4  | 3.80706E-24 | 1.17037312 | 0.15  | 0.046 | 1.18221E-19 | KO | Arhgap4  | 0.104 |
| Nfix     | 4.73257E-24 | 0.98343697 | 0.198 | 0.072 | 1.4696E-19  | KO | Nfix     | 0.126 |
| Rnf14    | 4.86478E-24 | 0.81934216 | 0.206 | 0.076 | 1.51066E-19 | KO | Rnf14    | 0.13  |
| Nuak2    | 5.16217E-24 | 0.87780922 | 0.186 | 0.064 | 1.60301E-19 | KO | Nuak2    | 0.122 |
| Tmem154  | 5.35879E-24 | 1.08345636 | 0.079 | 0.014 | 1.66406E-19 | KO | Tmem154  | 0.065 |
| Lhfpl2   | 6.14171E-24 | 0.69410293 | 0.29  | 0.129 | 1.90718E-19 | KO | Lhfpl2   | 0.161 |
| Usp18    | 6.67327E-24 | 0.72041012 | 0.105 | 0.024 | 2.07225E-19 | KO | Usp18    | 0.081 |
| Usp38    | 6.82538E-24 | 0.94437595 | 0.143 | 0.042 | 2.11948E-19 | KO | Usp38    | 0.101 |
| Cd200r4  | 6.89613E-24 | 0.84188452 | 0.218 | 0.083 | 2.14145E-19 | KO | Cd200r4  | 0.135 |
| Tmcc1    | 7.03116E-24 | 0.8081051  | 0.238 | 0.094 | 2.18339E-19 | KO | Tmcc1    | 0.144 |

|             |             |            |       |       |             |    |            |       |
|-------------|-------------|------------|-------|-------|-------------|----|------------|-------|
| Fcgrt       | 7.98556E-24 | 1.2438516  | 0.451 | 0.248 | 2.47975E-19 | KO | Fcgrt      | 0.203 |
| Fggy        | 8.00992E-24 | 1.07583039 | 0.097 | 0.021 | 2.48732E-19 | KO | Fggy       | 0.076 |
| Plekhm3     | 8.46226E-24 | 0.73942112 | 0.182 | 0.062 | 2.62778E-19 | KO | Plekhm3    | 0.12  |
| Prpf38a     | 8.92995E-24 | 0.74313261 | 0.263 | 0.11  | 2.77302E-19 | KO | Prpf38a    | 0.153 |
| Coq8b       | 1.02488E-23 | 0.91921686 | 0.168 | 0.056 | 3.18255E-19 | KO | Coq8b      | 0.112 |
| Ndst1       | 1.0385E-23  | 0.7311704  | 0.101 | 0.023 | 3.22486E-19 | KO | Ndst1      | 0.078 |
| Cog7        | 1.0946E-23  | 0.72687721 | 0.176 | 0.06  | 3.39907E-19 | KO | Cog7       | 0.116 |
| Ptgr2       | 1.15086E-23 | 0.74265248 | 0.155 | 0.048 | 3.57377E-19 | KO | Ptgr2      | 0.107 |
| Mrc1        | 1.15844E-23 | 0.8920335  | 0.678 | 0.459 | 3.59731E-19 | KO | Mrc1       | 0.219 |
| Mex3c       | 1.19921E-23 | 1.15477158 | 0.131 | 0.037 | 3.7239E-19  | KO | Mex3c      | 0.094 |
| Gm4070      | 1.33797E-23 | 1.45946261 | 0.059 | 0.007 | 4.15479E-19 | KO | Gm4070     | 0.052 |
| Lrrk1       | 1.42816E-23 | 0.90697868 | 0.146 | 0.044 | 4.43486E-19 | KO | Lrrk1      | 0.102 |
| Abcc5       | 1.46703E-23 | 0.74774009 | 0.222 | 0.086 | 4.55557E-19 | KO | Abcc5      | 0.136 |
| Lrp5        | 1.50385E-23 | 1.03561725 | 0.113 | 0.028 | 4.6699E-19  | KO | Lrp5       | 0.085 |
| Igf2bp2     | 1.60335E-23 | 0.93150076 | 0.104 | 0.024 | 4.97887E-19 | KO | Igf2bp2    | 0.08  |
| Ing3        | 1.63394E-23 | 0.72427688 | 0.124 | 0.033 | 5.07389E-19 | KO | Ing3       | 0.091 |
| Aco1        | 1.64996E-23 | 1.01166452 | 0.198 | 0.073 | 5.12364E-19 | KO | Aco1       | 0.125 |
| P2ry10      | 1.69186E-23 | 2.67163485 | 0.053 | 0.005 | 5.25374E-19 | KO | P2ry10     | 0.048 |
| Zfp704      | 1.86783E-23 | 1.04530715 | 0.116 | 0.03  | 5.80016E-19 | KO | Zfp704     | 0.086 |
| Tgtp2       | 1.97484E-23 | 2.11289751 | 0.048 | 0.004 | 6.13247E-19 | KO | Tgtp2      | 0.044 |
| Platr17     | 2.06449E-23 | 1.1928797  | 0.085 | 0.017 | 6.41087E-19 | KO | Platr17    | 0.068 |
| Lpgat1      | 2.06481E-23 | 0.74263904 | 0.203 | 0.075 | 6.41186E-19 | KO | Lpgat1     | 0.128 |
| Rpa3        | 2.11072E-23 | 0.74757457 | 0.156 | 0.05  | 6.55442E-19 | KO | Rpa3       | 0.106 |
| 5430427019F | 2.12905E-23 | 1.30554788 | 0.128 | 0.036 | 6.61135E-19 | KO | 5430427019 | 0.092 |
| Cstf2t      | 2.20835E-23 | 1.56251078 | 0.128 | 0.036 | 6.85759E-19 | KO | Cstf2t     | 0.092 |
| Tceanc2     | 2.35365E-23 | 1.15691851 | 0.154 | 0.049 | 7.30878E-19 | KO | Tceanc2    | 0.105 |
| As3mt       | 2.36142E-23 | 0.9797617  | 0.183 | 0.064 | 7.33293E-19 | KO | As3mt      | 0.119 |
| Emp1        | 2.39608E-23 | 0.74336193 | 0.619 | 0.422 | 7.44056E-19 | KO | Emp1       | 0.197 |
| Ccdc71l     | 2.44118E-23 | 0.88382452 | 0.31  | 0.142 | 7.5806E-19  | KO | Ccdc71l    | 0.168 |
| Polb        | 2.65089E-23 | 0.78084425 | 0.211 | 0.079 | 8.23182E-19 | KO | Polb       | 0.132 |
| Stk38       | 2.69354E-23 | 0.93627579 | 0.274 | 0.119 | 8.36426E-19 | KO | Stk38      | 0.155 |
| Plxna4os1   | 2.88171E-23 | 1.09869603 | 0.081 | 0.015 | 8.94858E-19 | KO | Plxna4os1  | 0.066 |
| Klra2       | 3.18347E-23 | 0.86339211 | 0.263 | 0.116 | 9.88562E-19 | KO | Klra2      | 0.147 |
| Arhgap6     | 3.36433E-23 | 1.51256719 | 0.063 | 0.008 | 1.04473E-18 | KO | Arhgap6    | 0.055 |
| Atg2a       | 4.00829E-23 | 0.70893788 | 0.17  | 0.057 | 1.2447E-18  | KO | Atg2a      | 0.113 |
| Grk5        | 4.03379E-23 | 1.53268359 | 0.076 | 0.013 | 1.25261E-18 | KO | Grk5       | 0.063 |
| Abca3       | 4.15308E-23 | 0.7721251  | 0.196 | 0.072 | 1.28965E-18 | KO | Abca3      | 0.124 |
| Fam43a      | 4.32592E-23 | 2.33471274 | 0.087 | 0.018 | 1.34333E-18 | KO | Fam43a     | 0.069 |
| Gca         | 4.70713E-23 | 1.40448338 | 0.087 | 0.017 | 1.4617E-18  | KO | Gca        | 0.07  |
| Wdfy2       | 5.05399E-23 | 0.73358116 | 0.324 | 0.153 | 1.56942E-18 | KO | Wdfy2      | 0.171 |
| Kmo         | 5.23413E-23 | 2.50115982 | 0.037 | 0.002 | 1.62535E-18 | KO | Kmo        | 0.035 |
| Aldoc       | 5.46037E-23 | 1.21746791 | 0.097 | 0.022 | 1.69561E-18 | KO | Aldoc      | 0.075 |
| Rai1        | 5.76526E-23 | 1.16601628 | 0.097 | 0.022 | 1.79029E-18 | KO | Rai1       | 0.075 |
| Fam198b     | 5.85607E-23 | 0.92713184 | 0.16  | 0.052 | 1.81849E-18 | KO | Fam198b    | 0.108 |
| Tmem185b    | 6.27045E-23 | 0.84973966 | 0.136 | 0.04  | 1.94716E-18 | KO | Tmem185b   | 0.096 |
| Ppp2r3d     | 6.55654E-23 | 0.84173537 | 0.148 | 0.046 | 2.036E-18   | KO | Ppp2r3d    | 0.102 |
| A530040E14R | 7.00856E-23 | 1.3665531  | 0.075 | 0.013 | 2.17637E-18 | KO | A530040E14 | 0.062 |
| Madd        | 7.26581E-23 | 0.71598285 | 0.164 | 0.055 | 2.25625E-18 | KO | Madd       | 0.109 |
| Grk3        | 7.43908E-23 | 1.21763192 | 0.154 | 0.049 | 2.31006E-18 | KO | Grk3       | 0.105 |
| Vps37b      | 7.56509E-23 | 0.99631146 | 0.215 | 0.084 | 2.34919E-18 | KO | Vps37b     | 0.131 |
| Hgf         | 8.66759E-23 | 0.79717877 | 0.155 | 0.05  | 2.69155E-18 | KO | Hgf        | 0.105 |
| Crnk1l1     | 9.58226E-23 | 0.81219611 | 0.164 | 0.055 | 2.97558E-18 | KO | Crnk1l1    | 0.109 |
| Slc35f5     | 1.00748E-22 | 0.70523784 | 0.134 | 0.039 | 3.12851E-18 | KO | Slc35f5    | 0.095 |
| Pdpm        | 1.038E-22   | 1.12890698 | 0.215 | 0.087 | 3.22329E-18 | KO | Pdpm       | 0.128 |

|            |             |            |       |       |             |    |            |       |
|------------|-------------|------------|-------|-------|-------------|----|------------|-------|
| Tfrc       | 1.07416E-22 | 1.43185793 | 0.2   | 0.078 | 3.33558E-18 | KO | Tfrc       | 0.122 |
| Ext2       | 1.1408E-22  | 0.70005323 | 0.196 | 0.072 | 3.54254E-18 | KO | Ext2       | 0.124 |
| Umad1      | 1.1463E-22  | 1.31348447 | 0.111 | 0.028 | 3.55961E-18 | KO | Umad1      | 0.083 |
| Braf       | 1.19293E-22 | 0.73726329 | 0.199 | 0.074 | 3.7044E-18  | KO | Braf       | 0.125 |
| Fbxo28     | 1.48459E-22 | 0.73600761 | 0.166 | 0.055 | 4.61008E-18 | KO | Fbxo28     | 0.111 |
| Lrpprc     | 1.59968E-22 | 0.69825547 | 0.196 | 0.073 | 4.9675E-18  | KO | Lrpprc     | 0.123 |
| Gpc1       | 2.02617E-22 | 1.6401729  | 0.079 | 0.015 | 6.29185E-18 | KO | Gpc1       | 0.064 |
| Fam53c     | 2.11729E-22 | 0.92844021 | 0.154 | 0.05  | 6.57483E-18 | KO | Fam53c     | 0.104 |
| Orai3      | 2.18326E-22 | 0.98577649 | 0.162 | 0.054 | 6.77967E-18 | KO | Orai3      | 0.108 |
| Chfr       | 2.22863E-22 | 0.96757545 | 0.182 | 0.065 | 6.92055E-18 | KO | Chfr       | 0.117 |
| Prcc2b     | 2.42458E-22 | 0.79679552 | 0.216 | 0.085 | 7.52904E-18 | KO | Prcc2b     | 0.131 |
| Uhrf1bp1l  | 2.85877E-22 | 0.72049169 | 0.25  | 0.106 | 8.87733E-18 | KO | Uhrf1bp1l  | 0.144 |
| Samsn1     | 3.06298E-22 | 1.19952645 | 0.216 | 0.088 | 9.51147E-18 | KO | Samsn1     | 0.128 |
| Ccl9       | 3.08285E-22 | 0.98264367 | 0.717 | 0.544 | 9.57319E-18 | KO | Ccl9       | 0.173 |
| Slc35a2    | 3.54426E-22 | 1.05181123 | 0.136 | 0.041 | 1.1006E-17  | KO | Slc35a2    | 0.095 |
| Zbtb20     | 4.19404E-22 | 0.77303504 | 0.223 | 0.091 | 1.30238E-17 | KO | Zbtb20     | 0.132 |
| Tmem168    | 4.23227E-22 | 0.70092553 | 0.246 | 0.103 | 1.31425E-17 | KO | Tmem168    | 0.143 |
| Pygo2      | 4.43114E-22 | 1.0840798  | 0.111 | 0.029 | 1.376E-17   | KO | Pygo2      | 0.082 |
| Slc30a4    | 4.57698E-22 | 1.58391063 | 0.067 | 0.011 | 1.42129E-17 | KO | Slc30a4    | 0.056 |
| Gzma       | 4.70057E-22 | 2.55287705 | 0.036 | 0.002 | 1.45967E-17 | KO | Gzma       | 0.034 |
| Adprm      | 4.7217E-22  | 0.77938731 | 0.116 | 0.031 | 1.46623E-17 | KO | Adprm      | 0.085 |
| Ldb1       | 6.3682E-22  | 0.81462601 | 0.2   | 0.077 | 1.97752E-17 | KO | Ldb1       | 0.123 |
| Rbm45      | 6.49384E-22 | 1.12096005 | 0.061 | 0.009 | 2.01653E-17 | KO | Rbm45      | 0.052 |
| Nbn        | 7.57767E-22 | 1.22637345 | 0.095 | 0.022 | 2.35309E-17 | KO | Nbn        | 0.073 |
| Tnfrsf13b  | 8.27848E-22 | 0.72158457 | 0.22  | 0.088 | 2.57072E-17 | KO | Tnfrsf13b  | 0.132 |
| Rfx1       | 9.27288E-22 | 0.90867395 | 0.12  | 0.034 | 2.87951E-17 | KO | Rfx1       | 0.086 |
| Med1       | 9.29225E-22 | 0.73527934 | 0.26  | 0.111 | 2.88552E-17 | KO | Med1       | 0.149 |
| Atrnl1     | 9.94021E-22 | 1.20976008 | 0.077 | 0.015 | 3.08673E-17 | KO | Atrnl1     | 0.062 |
| Oasl1      | 1.11535E-21 | 0.85963452 | 0.236 | 0.1   | 3.46348E-17 | KO | Oasl1      | 0.136 |
| Wdr41      | 1.21463E-21 | 0.78787109 | 0.219 | 0.087 | 3.77179E-17 | KO | Wdr41      | 0.132 |
| Tsc22d1    | 1.36485E-21 | 0.91103382 | 0.17  | 0.06  | 4.23825E-17 | KO | Tsc22d1    | 0.11  |
| Phf8       | 1.41615E-21 | 1.14657277 | 0.121 | 0.035 | 4.39756E-17 | KO | Phf8       | 0.086 |
| Blnk       | 1.49701E-21 | 0.87095418 | 0.27  | 0.124 | 4.64866E-17 | KO | Blnk       | 0.146 |
| St6gal1    | 1.69685E-21 | 1.35394676 | 0.115 | 0.032 | 5.26923E-17 | KO | St6gal1    | 0.083 |
| Osgin2     | 1.72018E-21 | 0.89794671 | 0.135 | 0.042 | 5.34168E-17 | KO | Osgin2     | 0.093 |
| Gm4841     | 1.76424E-21 | 1.73785978 | 0.031 | 0.001 | 5.47849E-17 | KO | Gm4841     | 0.03  |
| Cfh        | 2.10579E-21 | 1.5233212  | 0.134 | 0.042 | 6.53911E-17 | KO | Cfh        | 0.092 |
| Lipe       | 2.53919E-21 | 1.13883608 | 0.116 | 0.033 | 7.88494E-17 | KO | Lipe       | 0.083 |
| Mogs       | 2.71943E-21 | 0.88897155 | 0.179 | 0.065 | 8.44463E-17 | KO | Mogs       | 0.114 |
| Rhou       | 2.76059E-21 | 1.09685543 | 0.085 | 0.018 | 8.57246E-17 | KO | Rhou       | 0.067 |
| Rab29      | 2.84481E-21 | 1.30574854 | 0.124 | 0.037 | 8.83398E-17 | KO | Rab29      | 0.087 |
| Slmap      | 3.01238E-21 | 0.71358214 | 0.186 | 0.069 | 9.35434E-17 | KO | Slmap      | 0.117 |
| Rtl5       | 3.31018E-21 | 0.95535432 | 0.088 | 0.02  | 1.02791E-16 | KO | Rtl5       | 0.068 |
| Prpf6      | 3.41652E-21 | 0.70193578 | 0.166 | 0.058 | 1.06093E-16 | KO | Prpf6      | 0.108 |
| Ednrb      | 3.51069E-21 | 2.63003473 | 0.113 | 0.033 | 1.09017E-16 | KO | Ednrb      | 0.08  |
| Akt3       | 3.63654E-21 | 0.81801475 | 0.105 | 0.027 | 1.12926E-16 | KO | Akt3       | 0.078 |
| Fh1        | 3.84902E-21 | 0.76389686 | 0.292 | 0.134 | 1.19524E-16 | KO | Fh1        | 0.158 |
| Vps13b     | 3.85532E-21 | 0.71659986 | 0.176 | 0.064 | 1.19719E-16 | KO | Vps13b     | 0.112 |
| Secisbp2   | 4.39464E-21 | 0.88456208 | 0.16  | 0.056 | 1.36467E-16 | KO | Secisbp2   | 0.104 |
| AC125149.3 | 4.48623E-21 | 1.38746132 | 0.036 | 0.002 | 1.39311E-16 | KO | AC125149.3 | 0.034 |
| Arfip1     | 5.05449E-21 | 0.72043033 | 0.135 | 0.042 | 1.56957E-16 | KO | Arfip1     | 0.093 |
| C4b        | 5.11153E-21 | 1.48024946 | 0.231 | 0.105 | 1.58728E-16 | KO | C4b        | 0.126 |
| Myo18a     | 5.20727E-21 | 0.84983525 | 0.156 | 0.053 | 1.61701E-16 | KO | Myo18a     | 0.103 |
| Pdlim4     | 5.32348E-21 | 0.81179873 | 0.33  | 0.163 | 1.6531E-16  | KO | Pdlim4     | 0.167 |

|             |             |            |       |       |             |    |             |       |
|-------------|-------------|------------|-------|-------|-------------|----|-------------|-------|
| Ern1        | 5.34023E-21 | 1.04882765 | 0.111 | 0.03  | 1.6583E-16  | KO | Ern1        | 0.081 |
| Hbs1l       | 5.51252E-21 | 0.76799747 | 0.179 | 0.066 | 1.7118E-16  | KO | Hbs1l       | 0.113 |
| Sgms2       | 5.54919E-21 | 1.15014857 | 0.104 | 0.027 | 1.72319E-16 | KO | Sgms2       | 0.077 |
| Smim3       | 5.58631E-21 | 0.79747199 | 0.25  | 0.109 | 1.73472E-16 | KO | Smim3       | 0.141 |
| Fbxo34      | 5.62144E-21 | 1.00563204 | 0.12  | 0.035 | 1.74562E-16 | KO | Fbxo34      | 0.085 |
| Lactb       | 5.82006E-21 | 0.70098737 | 0.232 | 0.098 | 1.8073E-16  | KO | Lactb       | 0.134 |
| Il1rl2      | 5.96177E-21 | 1.62939488 | 0.073 | 0.014 | 1.85131E-16 | KO | Il1rl2      | 0.059 |
| Gm15564     | 6.06461E-21 | 2.03710808 | 0.069 | 0.012 | 1.88324E-16 | KO | Gm15564     | 0.057 |
| Phyh        | 6.10628E-21 | 0.79968886 | 0.202 | 0.079 | 1.89618E-16 | KO | Phyh        | 0.123 |
| Tspan5      | 6.12477E-21 | 0.71111483 | 0.117 | 0.033 | 1.90193E-16 | KO | Tspan5      | 0.084 |
| Flt3l       | 6.64911E-21 | 1.62116712 | 0.073 | 0.014 | 2.06475E-16 | KO | Flt3l       | 0.059 |
| Slamf6      | 6.86989E-21 | 1.16037482 | 0.115 | 0.032 | 2.13331E-16 | KO | Slamf6      | 0.083 |
| Dennd1c     | 8.01729E-21 | 0.87387302 | 0.142 | 0.046 | 2.48961E-16 | KO | Dennd1c     | 0.096 |
| Stac2       | 8.95881E-21 | 1.93343568 | 0.028 | 0     | 2.78198E-16 | KO | Stac2       | 0.028 |
| Ssh3        | 1.07795E-20 | 1.00811557 | 0.075 | 0.014 | 3.34735E-16 | KO | Ssh3        | 0.061 |
| Atp6v0a1    | 1.12009E-20 | 0.74917014 | 0.414 | 0.227 | 3.47821E-16 | KO | Atp6v0a1    | 0.187 |
| Tmem35b     | 1.14547E-20 | 1.3260251  | 0.071 | 0.013 | 3.55704E-16 | KO | Tmem35b     | 0.058 |
| Ptgir       | 1.15766E-20 | 1.88877531 | 0.043 | 0.004 | 3.59487E-16 | KO | Ptgir       | 0.039 |
| Hspa4l      | 1.35048E-20 | 0.98258467 | 0.155 | 0.054 | 4.19364E-16 | KO | Hspa4l      | 0.101 |
| Heca        | 1.62824E-20 | 0.70941916 | 0.156 | 0.055 | 5.05616E-16 | KO | Heca        | 0.101 |
| Sirpb1b     | 1.6407E-20  | 0.98191481 | 0.112 | 0.031 | 5.09485E-16 | KO | Sirpb1b     | 0.081 |
| Slc4a11     | 1.65254E-20 | 2.52380608 | 0.029 | 0.001 | 5.13163E-16 | KO | Slc4a11     | 0.028 |
| Ddx60       | 1.68523E-20 | 1.06747539 | 0.144 | 0.048 | 5.23314E-16 | KO | Ddx60       | 0.096 |
| Trem12      | 1.75489E-20 | 0.71637698 | 0.105 | 0.028 | 5.44947E-16 | KO | Trem12      | 0.077 |
| Mcoln2      | 1.8334E-20  | 1.39746122 | 0.103 | 0.027 | 5.69325E-16 | KO | Mcoln2      | 0.076 |
| Dcun1d3     | 1.87873E-20 | 0.75565736 | 0.091 | 0.021 | 5.83402E-16 | KO | Dcun1d3     | 0.07  |
| Bambi       | 1.88553E-20 | 1.37881505 | 0.073 | 0.014 | 5.85512E-16 | KO | Bambi       | 0.059 |
| Phactr2     | 1.92868E-20 | 0.79742354 | 0.18  | 0.068 | 5.98912E-16 | KO | Phactr2     | 0.112 |
| Sphk1       | 2.06698E-20 | 1.50790289 | 0.065 | 0.011 | 6.4186E-16  | KO | Sphk1       | 0.054 |
| Mob3c       | 2.18135E-20 | 0.97382596 | 0.138 | 0.045 | 6.77375E-16 | KO | Mob3c       | 0.093 |
| Srek1ip1    | 2.25872E-20 | 0.90358284 | 0.175 | 0.064 | 7.014E-16   | KO | Srek1ip1    | 0.111 |
| Sec23b      | 2.40144E-20 | 0.87853856 | 0.263 | 0.118 | 7.45719E-16 | KO | Sec23b      | 0.145 |
| Ccnd2       | 2.67417E-20 | 0.85361526 | 0.242 | 0.107 | 8.30411E-16 | KO | Ccnd2       | 0.135 |
| Zfp62       | 2.6839E-20  | 0.75728274 | 0.13  | 0.04  | 8.3343E-16  | KO | Zfp62       | 0.09  |
| 1700019L13R | 2.73253E-20 | 1.69591529 | 0.067 | 0.012 | 8.48531E-16 | KO | 1700019L13l | 0.055 |
| Rnd3        | 2.86028E-20 | 0.99327589 | 0.15  | 0.052 | 8.88203E-16 | KO | Rnd3        | 0.098 |
| Adam19      | 3.45672E-20 | 2.23597524 | 0.077 | 0.016 | 1.07341E-15 | KO | Adam19      | 0.061 |
| Lysmd3      | 3.64186E-20 | 1.16674183 | 0.113 | 0.033 | 1.13091E-15 | KO | Lysmd3      | 0.08  |
| Gm20513     | 3.67123E-20 | 2.37148887 | 0.025 | 0     | 1.14003E-15 | KO | Gm20513     | 0.025 |
| Tmem198b    | 4.12755E-20 | 1.66204479 | 0.073 | 0.014 | 1.28173E-15 | KO | Tmem198b    | 0.059 |
| Kcnj10      | 4.2075E-20  | 1.5777972  | 0.044 | 0.004 | 1.30655E-15 | KO | Kcnj10      | 0.04  |
| AW011738    | 4.22576E-20 | 1.22578766 | 0.073 | 0.014 | 1.31222E-15 | KO | AW011738    | 0.059 |
| Idi1        | 4.29074E-20 | 1.41558518 | 0.111 | 0.032 | 1.3324E-15  | KO | Idi1        | 0.079 |
| Abhd4       | 4.54071E-20 | 0.73863123 | 0.136 | 0.044 | 1.41003E-15 | KO | Abhd4       | 0.092 |
| 2610002M06l | 4.6136E-20  | 0.82705177 | 0.175 | 0.066 | 1.43266E-15 | KO | 2610002M06l | 0.109 |
| Blcap       | 4.87211E-20 | 0.71291664 | 0.167 | 0.06  | 1.51294E-15 | KO | Blcap       | 0.107 |
| Ercc3       | 5.00633E-20 | 0.73604656 | 0.148 | 0.05  | 1.55461E-15 | KO | Ercc3       | 0.098 |
| Fryl        | 5.10962E-20 | 0.79108956 | 0.183 | 0.07  | 1.58669E-15 | KO | Fryl        | 0.113 |
| Syt11       | 5.32311E-20 | 1.22058574 | 0.065 | 0.011 | 1.65299E-15 | KO | Syt11       | 0.054 |
| Ccser2      | 5.94226E-20 | 0.7215438  | 0.117 | 0.034 | 1.84525E-15 | KO | Ccser2      | 0.083 |
| Pigc        | 6.43867E-20 | 1.3292546  | 0.092 | 0.023 | 1.9994E-15  | KO | Pigc        | 0.069 |
| Slc9a9      | 6.73405E-20 | 0.83521904 | 0.184 | 0.071 | 2.09112E-15 | KO | Slc9a9      | 0.113 |
| Emsy        | 7.73559E-20 | 0.86200092 | 0.167 | 0.061 | 2.40213E-15 | KO | Emsy        | 0.106 |
| Traf3       | 8.04064E-20 | 0.70992303 | 0.152 | 0.053 | 2.49686E-15 | KO | Traf3       | 0.099 |

|             |             |            |       |       |             |    |            |       |
|-------------|-------------|------------|-------|-------|-------------|----|------------|-------|
| Rpe         | 8.45593E-20 | 0.77154732 | 0.167 | 0.061 | 2.62582E-15 | KO | Rpe        | 0.106 |
| Ggct        | 9.08771E-20 | 0.77300113 | 0.136 | 0.045 | 2.82201E-15 | KO | Ggct       | 0.091 |
| Tmem161b    | 9.19583E-20 | 0.9528685  | 0.101 | 0.027 | 2.85558E-15 | KO | Tmem161b   | 0.074 |
| F830016B08R | 9.68745E-20 | 2.03595734 | 0.057 | 0.009 | 3.00824E-15 | KO | F830016B08 | 0.048 |
| Gramd3      | 9.9895E-20  | 1.39327718 | 0.089 | 0.022 | 3.10204E-15 | KO | Gramd3     | 0.067 |
| Ptprs       | 1.07278E-19 | 1.03984947 | 0.152 | 0.054 | 3.33129E-15 | KO | Ptprs      | 0.098 |
| Mef2c       | 1.14714E-19 | 0.76401409 | 0.351 | 0.185 | 3.5622E-15  | KO | Mef2c      | 0.166 |
| Chsy1       | 1.18128E-19 | 1.03050476 | 0.108 | 0.03  | 3.66822E-15 | KO | Chsy1      | 0.078 |
| Palld       | 1.29697E-19 | 0.95065087 | 0.128 | 0.041 | 4.02748E-15 | KO | Palld      | 0.087 |
| Sorl1       | 1.39214E-19 | 1.10136336 | 0.121 | 0.037 | 4.323E-15   | KO | Sorl1      | 0.084 |
| Trmt1l      | 1.44469E-19 | 1.05852295 | 0.132 | 0.043 | 4.48618E-15 | KO | Trmt1l     | 0.089 |
| Cyp51       | 1.47141E-19 | 1.3882492  | 0.119 | 0.036 | 4.56917E-15 | KO | Cyp51      | 0.083 |
| Fas         | 1.77951E-19 | 1.03582792 | 0.123 | 0.038 | 5.5259E-15  | KO | Fas        | 0.085 |
| Phf11a      | 1.82281E-19 | 1.01175992 | 0.079 | 0.017 | 5.66037E-15 | KO | Phf11a     | 0.062 |
| Wdr37       | 1.84551E-19 | 0.9489772  | 0.178 | 0.068 | 5.73087E-15 | KO | Wdr37      | 0.11  |
| Banp        | 1.96224E-19 | 1.18837114 | 0.089 | 0.022 | 6.09335E-15 | KO | Banp       | 0.067 |
| Smg7        | 2.0012E-19  | 0.74864583 | 0.224 | 0.095 | 6.21432E-15 | KO | Smg7       | 0.129 |
| Hal         | 2.02581E-19 | 2.33160226 | 0.037 | 0.003 | 6.29073E-15 | KO | Hal        | 0.034 |
| Chp2        | 2.08098E-19 | 2.89610264 | 0.036 | 0.002 | 6.46207E-15 | KO | Chp2       | 0.034 |
| C77080      | 2.27523E-19 | 1.13345507 | 0.072 | 0.014 | 7.06528E-15 | KO | C77080     | 0.058 |
| Sgpp1       | 2.97807E-19 | 0.78980909 | 0.227 | 0.099 | 9.2478E-15  | KO | Sgpp1      | 0.128 |
| Sult1a1     | 3.17906E-19 | 1.99705248 | 0.077 | 0.017 | 9.87194E-15 | KO | Sult1a1    | 0.06  |
| Mpv17       | 3.28229E-19 | 0.93569922 | 0.115 | 0.034 | 1.01925E-14 | KO | Mpv17      | 0.081 |
| Cd209b      | 3.52705E-19 | 4.22117611 | 0.024 | 0     | 1.09525E-14 | KO | Cd209b     | 0.024 |
| Pla2g2d     | 3.52705E-19 | 4.21890665 | 0.024 | 0     | 1.09525E-14 | KO | Pla2g2d    | 0.024 |
| Ltbp3       | 3.53485E-19 | 1.90277653 | 0.072 | 0.015 | 1.09768E-14 | KO | Ltbp3      | 0.057 |
| Esr1        | 3.55006E-19 | 1.07879466 | 0.06  | 0.01  | 1.1024E-14  | KO | Esr1       | 0.05  |
| Snx29       | 3.60141E-19 | 1.05022401 | 0.159 | 0.058 | 1.11835E-14 | KO | Snx29      | 0.101 |
| Tmem39a     | 3.61946E-19 | 1.10421823 | 0.095 | 0.025 | 1.12395E-14 | KO | Tmem39a    | 0.07  |
| Inpp5b      | 4.34531E-19 | 0.97532835 | 0.132 | 0.044 | 1.34935E-14 | KO | Inpp5b     | 0.088 |
| Txlna       | 5.36986E-19 | 0.96364803 | 0.183 | 0.073 | 1.6675E-14  | KO | Txlna      | 0.11  |
| Nectin1     | 5.37923E-19 | 2.33082346 | 0.048 | 0.006 | 1.67041E-14 | KO | Nectin1    | 0.042 |
| Kif1bp      | 5.44397E-19 | 0.80786628 | 0.119 | 0.036 | 1.69052E-14 | KO | Kif1bp     | 0.083 |
| Trim35      | 5.4544E-19  | 0.7905853  | 0.286 | 0.138 | 1.69375E-14 | KO | Trim35     | 0.148 |
| Ifi44       | 5.58412E-19 | 1.26735462 | 0.059 | 0.01  | 1.73404E-14 | KO | Ifi44      | 0.049 |
| Galnt10     | 7.01288E-19 | 0.91609043 | 0.132 | 0.044 | 2.17771E-14 | KO | Galnt10    | 0.088 |
| Cst7        | 7.81597E-19 | 2.00591282 | 0.044 | 0.005 | 2.42709E-14 | KO | Cst7       | 0.039 |
| Dock1       | 8.16427E-19 | 0.88109457 | 0.144 | 0.051 | 2.53525E-14 | KO | Dock1      | 0.093 |
| Wnt11       | 8.18408E-19 | 2.82808567 | 0.025 | 0     | 2.5414E-14  | KO | Wnt11      | 0.025 |
| Fmn1l       | 8.87439E-19 | 0.74843139 | 0.284 | 0.137 | 2.75576E-14 | KO | Fmn1l      | 0.147 |
| Zfp513      | 9.6463E-19  | 0.81046754 | 0.124 | 0.04  | 2.99546E-14 | KO | Zfp513     | 0.084 |
| Itk         | 1.05221E-18 | 2.84597506 | 0.037 | 0.003 | 3.26743E-14 | KO | Itk        | 0.034 |
| Ccl22       | 1.14974E-18 | 2.11771709 | 0.037 | 0.003 | 3.57029E-14 | KO | Ccl22      | 0.034 |
| Rab2b       | 1.23156E-18 | 0.9999824  | 0.073 | 0.016 | 3.82437E-14 | KO | Rab2b      | 0.057 |
| Atp8b2      | 1.27581E-18 | 1.52347595 | 0.052 | 0.008 | 3.96178E-14 | KO | Atp8b2     | 0.044 |
| Hr          | 1.39748E-18 | 2.59072391 | 0.027 | 0.001 | 4.33958E-14 | KO | Hr         | 0.026 |
| Zbtb11      | 1.42811E-18 | 1.14636463 | 0.111 | 0.033 | 4.43472E-14 | KO | Zbtb11     | 0.078 |
| Daam1       | 1.58252E-18 | 0.75254362 | 0.115 | 0.035 | 4.91418E-14 | KO | Daam1      | 0.08  |
| Slfn9       | 1.60187E-18 | 1.24115975 | 0.121 | 0.039 | 4.97429E-14 | KO | Slfn9      | 0.082 |
| Tfec        | 1.63013E-18 | 0.81299794 | 0.159 | 0.06  | 5.06205E-14 | KO | Tfec       | 0.099 |
| Smarcal1    | 1.73821E-18 | 1.03677337 | 0.097 | 0.027 | 5.39766E-14 | KO | Smarcal1   | 0.07  |
| Adpgk       | 2.20317E-18 | 0.74361449 | 0.155 | 0.058 | 6.84151E-14 | KO | Adpgk      | 0.097 |
| Pdlim1      | 2.35746E-18 | 1.50294024 | 0.109 | 0.033 | 7.32062E-14 | KO | Pdlim1     | 0.076 |
| Gpr68       | 2.66659E-18 | 1.47754122 | 0.032 | 0.002 | 8.28055E-14 | KO | Gpr68      | 0.03  |

|             |             |            |       |       |             |    |             |       |
|-------------|-------------|------------|-------|-------|-------------|----|-------------|-------|
| Nploc4      | 2.67741E-18 | 0.79359421 | 0.188 | 0.077 | 8.31416E-14 | KO | Nploc4      | 0.111 |
| Ksr1        | 2.8064E-18  | 1.64338507 | 0.061 | 0.011 | 8.7147E-14  | KO | Ksr1        | 0.05  |
| Ptpn22      | 2.95451E-18 | 0.83599738 | 0.216 | 0.095 | 9.17463E-14 | KO | Ptpn22      | 0.121 |
| Hps5        | 3.04587E-18 | 1.12659348 | 0.13  | 0.044 | 9.45834E-14 | KO | Hps5        | 0.086 |
| Klhl18      | 3.12571E-18 | 0.92111897 | 0.091 | 0.024 | 9.70628E-14 | KO | Klhl18      | 0.067 |
| Ccdc163     | 3.27787E-18 | 1.19134345 | 0.088 | 0.023 | 1.01788E-13 | KO | Ccdc163     | 0.065 |
| Gm38335     | 3.98776E-18 | 1.33821884 | 0.072 | 0.016 | 1.23832E-13 | KO | Gm38335     | 0.056 |
| Acyp1       | 4.08016E-18 | 0.81254884 | 0.121 | 0.039 | 1.26701E-13 | KO | Acyp1       | 0.082 |
| Abcd2       | 4.31701E-18 | 1.25362328 | 0.089 | 0.023 | 1.34056E-13 | KO | Abcd2       | 0.066 |
| Siae        | 4.45843E-18 | 0.71256159 | 0.115 | 0.036 | 1.38448E-13 | KO | Siae        | 0.079 |
| Lrrc42      | 4.46051E-18 | 0.71927581 | 0.111 | 0.034 | 1.38512E-13 | KO | Lrrc42      | 0.077 |
| Mcoln1      | 4.855E-18   | 0.79801802 | 0.13  | 0.044 | 1.50762E-13 | KO | Mcoln1      | 0.086 |
| Zfp219      | 4.95081E-18 | 0.89894896 | 0.1   | 0.028 | 1.53737E-13 | KO | Zfp219      | 0.072 |
| Papd7       | 5.03738E-18 | 1.06723554 | 0.112 | 0.035 | 1.56426E-13 | KO | Papd7       | 0.077 |
| Tbc1d8      | 5.05015E-18 | 1.10477358 | 0.1   | 0.029 | 1.56822E-13 | KO | Tbc1d8      | 0.071 |
| Anks1       | 5.34249E-18 | 0.88970268 | 0.168 | 0.066 | 1.659E-13   | KO | Anks1       | 0.102 |
| Idua        | 5.45652E-18 | 0.70912233 | 0.109 | 0.033 | 1.69441E-13 | KO | Idua        | 0.076 |
| Rab27a      | 5.75908E-18 | 0.79088595 | 0.064 | 0.012 | 1.78837E-13 | KO | Rab27a      | 0.052 |
| Ext1        | 6.67262E-18 | 0.75797782 | 0.158 | 0.06  | 2.07205E-13 | KO | Ext1        | 0.098 |
| Steap3      | 6.86369E-18 | 0.87512068 | 0.12  | 0.039 | 2.13138E-13 | KO | Steap3      | 0.081 |
| Ctns        | 6.99695E-18 | 1.13964    | 0.104 | 0.031 | 2.17276E-13 | KO | Ctns        | 0.073 |
| Gtpbp1      | 1.04199E-17 | 0.75070625 | 0.138 | 0.048 | 3.23568E-13 | KO | Gtpbp1      | 0.09  |
| Rbms2       | 1.12054E-17 | 0.77039317 | 0.135 | 0.047 | 3.4796E-13  | KO | Rbms2       | 0.088 |
| Bmp2        | 1.29862E-17 | 3.10744196 | 0.025 | 0.001 | 4.0326E-13  | KO | Bmp2        | 0.024 |
| Atp2b4      | 1.33755E-17 | 0.90670413 | 0.089 | 0.024 | 4.15349E-13 | KO | Atp2b4      | 0.065 |
| Oit3        | 1.35598E-17 | 1.81302796 | 0.025 | 0.001 | 4.21073E-13 | KO | Oit3        | 0.024 |
| Al606181    | 1.41814E-17 | 1.02927406 | 0.065 | 0.013 | 4.40376E-13 | KO | Al606181    | 0.052 |
| Slc16a7     | 1.54494E-17 | 1.22360929 | 0.097 | 0.028 | 4.7975E-13  | KO | Slc16a7     | 0.069 |
| Rfx2        | 1.5864E-17  | 1.58777092 | 0.033 | 0.002 | 4.92623E-13 | KO | Rfx2        | 0.031 |
| Pgghg       | 1.75237E-17 | 1.18181171 | 0.069 | 0.015 | 5.44163E-13 | KO | Pgghg       | 0.054 |
| Id3         | 1.81294E-17 | 0.85503764 | 0.14  | 0.052 | 5.62973E-13 | KO | Id3         | 0.088 |
| Pou3f1      | 1.98842E-17 | 1.05794274 | 0.032 | 0.002 | 6.17464E-13 | KO | Pou3f1      | 0.03  |
| Gm14461     | 2.23676E-17 | 1.53740023 | 0.031 | 0.002 | 6.94582E-13 | KO | Gm14461     | 0.029 |
| Ddx23       | 2.28493E-17 | 0.83694685 | 0.134 | 0.047 | 7.09541E-13 | KO | Ddx23       | 0.087 |
| Tinf2       | 2.32977E-17 | 1.12845019 | 0.104 | 0.032 | 7.23464E-13 | KO | Tinf2       | 0.072 |
| Nod2        | 2.58517E-17 | 1.77746173 | 0.048 | 0.007 | 8.02774E-13 | KO | Nod2        | 0.041 |
| Rpl10-ps3   | 2.61206E-17 | 0.86925292 | 0.124 | 0.042 | 8.11123E-13 | KO | Rpl10-ps3   | 0.082 |
| Kitl        | 2.98223E-17 | 1.15617734 | 0.088 | 0.024 | 9.26072E-13 | KO | Kitl        | 0.064 |
| Dusp10      | 3.23302E-17 | 1.26923286 | 0.088 | 0.024 | 1.00395E-12 | KO | Dusp10      | 0.064 |
| Il13        | 3.25968E-17 | 3.56635712 | 0.021 | 0     | 1.01223E-12 | KO | Il13        | 0.021 |
| Kin         | 3.47405E-17 | 0.97628897 | 0.117 | 0.039 | 1.0788E-12  | KO | Kin         | 0.078 |
| Lyz1        | 3.51654E-17 | 3.85112451 | 0.087 | 0.024 | 1.09199E-12 | KO | Lyz1        | 0.063 |
| Mras        | 3.60978E-17 | 1.57042544 | 0.069 | 0.015 | 1.12094E-12 | KO | Mras        | 0.054 |
| Enpp4       | 4.02458E-17 | 1.2509278  | 0.061 | 0.012 | 1.24975E-12 | KO | Enpp4       | 0.049 |
| Mocos       | 4.06416E-17 | 0.79261521 | 0.068 | 0.015 | 1.26204E-12 | KO | Mocos       | 0.053 |
| Pcmt2       | 4.09087E-17 | 1.07640761 | 0.093 | 0.027 | 1.27034E-12 | KO | Pcmt2       | 0.066 |
| Pou2f2      | 4.13719E-17 | 0.80480137 | 0.286 | 0.145 | 1.28472E-12 | KO | Pou2f2      | 0.141 |
| Dnajb12     | 4.37825E-17 | 0.69538622 | 0.119 | 0.039 | 1.35958E-12 | KO | Dnajb12     | 0.08  |
| Oas2        | 5.29941E-17 | 1.14156852 | 0.101 | 0.031 | 1.64563E-12 | KO | Oas2        | 0.07  |
| A630001G21F | 5.96674E-17 | 0.73949349 | 0.144 | 0.054 | 1.85285E-12 | KO | A630001G21  | 0.09  |
| Ankra2      | 6.78578E-17 | 1.09192276 | 0.105 | 0.033 | 2.10719E-12 | KO | Ankra2      | 0.072 |
| 9130230L23R | 7.32147E-17 | 1.38922584 | 0.043 | 0.005 | 2.27354E-12 | KO | 9130230L23I | 0.038 |
| Rhoq        | 7.95242E-17 | 0.77523335 | 0.186 | 0.079 | 2.46946E-12 | KO | Rhoq        | 0.107 |
| Trbc2       | 8.73228E-17 | 2.31251388 | 0.057 | 0.011 | 2.71164E-12 | KO | Trbc2       | 0.046 |

|          |             |            |       |       |             |    |          |       |
|----------|-------------|------------|-------|-------|-------------|----|----------|-------|
| Cpped1   | 9.44149E-17 | 0.98355676 | 0.139 | 0.051 | 2.93187E-12 | KO | Cpped1   | 0.088 |
| Ankrd27  | 1.06692E-16 | 0.85828693 | 0.105 | 0.033 | 3.3131E-12  | KO | Ankrd27  | 0.072 |
| Eps8l1   | 1.20962E-16 | 1.94521112 | 0.032 | 0.002 | 3.75623E-12 | KO | Eps8l1   | 0.03  |
| Ttpal    | 1.4184E-16  | 0.88760069 | 0.085 | 0.023 | 4.40454E-12 | KO | Ttpal    | 0.062 |
| Mier3    | 1.54228E-16 | 1.13991723 | 0.073 | 0.018 | 4.78925E-12 | KO | Mier3    | 0.055 |
| Ppp1r12b | 1.56144E-16 | 0.81396589 | 0.064 | 0.014 | 4.84874E-12 | KO | Ppp1r12b | 0.05  |
| Crebl2   | 1.57898E-16 | 1.12524949 | 0.044 | 0.006 | 4.90322E-12 | KO | Crebl2   | 0.038 |
| Clec2g   | 1.63879E-16 | 2.53595168 | 0.025 | 0.001 | 5.08895E-12 | KO | Clec2g   | 0.024 |
| Siglecf  | 1.71869E-16 | 1.43314414 | 0.025 | 0.001 | 5.33704E-12 | KO | Siglecf  | 0.024 |
| Mag      | 1.81492E-16 | 1.17608211 | 0.068 | 0.015 | 5.63588E-12 | KO | Mag      | 0.053 |
| Tst      | 1.85417E-16 | 1.64468684 | 0.055 | 0.01  | 5.75775E-12 | KO | Tst      | 0.045 |
| Hspa1l   | 2.03719E-16 | 1.03340878 | 0.028 | 0.002 | 6.32608E-12 | KO | Hspa1l   | 0.026 |
| Ermard   | 2.17758E-16 | 1.07098646 | 0.099 | 0.03  | 6.76203E-12 | KO | Ermard   | 0.069 |
| Erich1   | 2.33628E-16 | 0.70454395 | 0.081 | 0.021 | 7.25486E-12 | KO | Erich1   | 0.06  |
| Gm20604  | 2.36156E-16 | 1.06594749 | 0.085 | 0.023 | 7.33337E-12 | KO | Gm20604  | 0.062 |
| Palm     | 2.41433E-16 | 0.82160964 | 0.087 | 0.024 | 7.49721E-12 | KO | Palm     | 0.063 |
| Pde7b    | 2.41435E-16 | 1.18399527 | 0.063 | 0.013 | 7.49727E-12 | KO | Pde7b    | 0.05  |
| Nkg7     | 2.70139E-16 | 1.89392961 | 0.059 | 0.012 | 8.38861E-12 | KO | Nkg7     | 0.047 |
| Gpr18    | 2.7747E-16  | 1.57393868 | 0.043 | 0.006 | 8.61626E-12 | KO | Gpr18    | 0.037 |
| Rusc1    | 3.05466E-16 | 0.92485964 | 0.097 | 0.03  | 9.48562E-12 | KO | Rusc1    | 0.067 |
| Hepacam2 | 3.13694E-16 | 2.30050404 | 0.02  | 0     | 9.74114E-12 | KO | Hepacam2 | 0.02  |
| Klrb1a   | 3.13694E-16 | 1.61239393 | 0.02  | 0     | 9.74114E-12 | KO | Klrb1a   | 0.02  |
| Ryr1     | 3.60522E-16 | 1.39751905 | 0.053 | 0.01  | 1.11953E-11 | KO | Ryr1     | 0.043 |
| Vill     | 4.08226E-16 | 0.70002573 | 0.162 | 0.066 | 1.26766E-11 | KO | Vill     | 0.096 |
| Hsph1    | 4.4966E-16  | 1.01299077 | 0.124 | 0.044 | 1.39633E-11 | KO | Hsph1    | 0.08  |
| Qpct     | 4.83415E-16 | 1.04612589 | 0.184 | 0.081 | 1.50115E-11 | KO | Qpct     | 0.103 |
| Fbxo30   | 5.58976E-16 | 0.85236505 | 0.134 | 0.05  | 1.73579E-11 | KO | Fbxo30   | 0.084 |
| Ldlrad3  | 6.79762E-16 | 1.10225856 | 0.067 | 0.015 | 2.11086E-11 | KO | Ldlrad3  | 0.052 |
| Otud1    | 6.95335E-16 | 0.87414281 | 0.08  | 0.021 | 2.15922E-11 | KO | Otud1    | 0.059 |
| Hmgxb4   | 7.51527E-16 | 1.15355022 | 0.089 | 0.026 | 2.33372E-11 | KO | Hmgxb4   | 0.063 |
| Atg2b    | 7.81286E-16 | 1.37202124 | 0.101 | 0.032 | 2.42613E-11 | KO | Atg2b    | 0.069 |
| Man2a2   | 8.72455E-16 | 0.75531394 | 0.191 | 0.084 | 2.70923E-11 | KO | Man2a2   | 0.107 |
| Cysltr2  | 9.34945E-16 | 2.32257463 | 0.036 | 0.004 | 2.90328E-11 | KO | Cysltr2  | 0.032 |
| Tusc1    | 1.00399E-15 | 1.04382151 | 0.117 | 0.041 | 3.11769E-11 | KO | Tusc1    | 0.076 |
| Unc13d   | 1.03696E-15 | 0.88038746 | 0.105 | 0.034 | 3.22008E-11 | KO | Unc13d   | 0.071 |
| Pdgfb    | 1.1504E-15  | 1.29053558 | 0.092 | 0.028 | 3.57234E-11 | KO | Pdgfb    | 0.064 |
| Tnfrsf18 | 1.22565E-15 | 1.60549879 | 0.047 | 0.008 | 3.806E-11   | KO | Tnfrsf18 | 0.039 |
| Bcl2l2   | 1.24345E-15 | 1.14443443 | 0.087 | 0.025 | 3.86129E-11 | KO | Bcl2l2   | 0.062 |
| Sc5d     | 1.28134E-15 | 0.86673197 | 0.08  | 0.022 | 3.97893E-11 | KO | Sc5d     | 0.058 |
| Cnnm4    | 1.30733E-15 | 0.98844373 | 0.067 | 0.016 | 4.05964E-11 | KO | Cnnm4    | 0.051 |
| Adgre4   | 1.47161E-15 | 2.63195395 | 0.028 | 0.002 | 4.56979E-11 | KO | Adgre4   | 0.026 |
| Gm26510  | 1.56989E-15 | 1.08373872 | 0.072 | 0.018 | 4.87499E-11 | KO | Gm26510  | 0.054 |
| Csf3     | 1.67922E-15 | 2.84517347 | 0.027 | 0.002 | 5.21448E-11 | KO | Csf3     | 0.025 |
| Mapre3   | 1.77552E-15 | 0.79203004 | 0.071 | 0.017 | 5.51353E-11 | KO | Mapre3   | 0.054 |
| Pld2     | 1.78824E-15 | 0.86829916 | 0.134 | 0.05  | 5.55302E-11 | KO | Pld2     | 0.084 |
| Zscan26  | 1.83515E-15 | 0.97628106 | 0.093 | 0.029 | 5.6987E-11  | KO | Zscan26  | 0.064 |
| Spic     | 2.14632E-15 | 2.11901052 | 0.043 | 0.006 | 6.66497E-11 | KO | Spic     | 0.037 |
| Isoc1    | 2.30046E-15 | 0.86471768 | 0.113 | 0.039 | 7.14362E-11 | KO | Isoc1    | 0.074 |
| Ccdc91   | 2.45443E-15 | 1.18904721 | 0.053 | 0.01  | 7.62175E-11 | KO | Ccdc91   | 0.043 |
| Ccdc102a | 2.55022E-15 | 1.31030041 | 0.049 | 0.009 | 7.91921E-11 | KO | Ccdc102a | 0.04  |
| Rnf25    | 2.63712E-15 | 0.83846614 | 0.092 | 0.028 | 8.18906E-11 | KO | Rnf25    | 0.064 |
| Acvr1b   | 2.70891E-15 | 0.7317437  | 0.089 | 0.027 | 8.41199E-11 | KO | Acvr1b   | 0.062 |
| Btbd17   | 3.02187E-15 | 1.713206   | 0.019 | 0     | 9.38381E-11 | KO | Btbd17   | 0.019 |
| Atxn3    | 3.55429E-15 | 0.86564436 | 0.142 | 0.055 | 1.10372E-10 | KO | Atxn3    | 0.087 |

|              |             |            |       |       |             |    |             |       |
|--------------|-------------|------------|-------|-------|-------------|----|-------------|-------|
| Fbxo38       | 3.58805E-15 | 0.70881269 | 0.152 | 0.061 | 1.1142E-10  | KO | Fbxo38      | 0.091 |
| Gm15987      | 3.65117E-15 | 1.40579644 | 0.044 | 0.007 | 1.1338E-10  | KO | Gm15987     | 0.037 |
| Casd1        | 3.87461E-15 | 0.69571724 | 0.108 | 0.037 | 1.20318E-10 | KO | Casd1       | 0.071 |
| Pprc1        | 4.21028E-15 | 0.71918761 | 0.101 | 0.033 | 1.30742E-10 | KO | Pprc1       | 0.068 |
| Slc39a9      | 4.26731E-15 | 0.77475705 | 0.131 | 0.049 | 1.32513E-10 | KO | Slc39a9     | 0.082 |
| 9030025P20R  | 4.41175E-15 | 1.51689091 | 0.044 | 0.007 | 1.36998E-10 | KO | 9030025P20  | 0.037 |
| Zfyve27      | 6.46255E-15 | 0.75163159 | 0.097 | 0.031 | 2.00681E-10 | KO | Zfyve27     | 0.066 |
| Sfi1         | 7.2066E-15  | 0.84132889 | 0.076 | 0.021 | 2.23787E-10 | KO | Sfi1        | 0.055 |
| Rgs14        | 7.79716E-15 | 0.81651998 | 0.088 | 0.027 | 2.42125E-10 | KO | Rgs14       | 0.061 |
| Ing5         | 8.14431E-15 | 1.09436802 | 0.103 | 0.035 | 2.52905E-10 | KO | Ing5        | 0.068 |
| Pak4         | 9.41551E-15 | 0.88066177 | 0.071 | 0.018 | 2.9238E-10  | KO | Pak4        | 0.053 |
| 1110002J07Ri | 9.91882E-15 | 1.94235523 | 0.028 | 0.002 | 3.08009E-10 | KO | 1110002J07F | 0.026 |
| Gpr176       | 1.00891E-14 | 1.09076843 | 0.028 | 0.002 | 3.13297E-10 | KO | Gpr176      | 0.026 |
| Tlr11        | 1.05427E-14 | 1.76520154 | 0.021 | 0.001 | 3.27383E-10 | KO | Tlr11       | 0.02  |
| Asgr2        | 1.07938E-14 | 2.03651645 | 0.021 | 0.001 | 3.3518E-10  | KO | Asgr2       | 0.02  |
| Gm47242      | 1.0973E-14  | 1.28357627 | 0.021 | 0.001 | 3.40746E-10 | KO | Gm47242     | 0.02  |
| Lipo3        | 1.16837E-14 | 1.14134063 | 0.103 | 0.035 | 3.62813E-10 | KO | Lipo3       | 0.068 |
| Rnf128       | 1.36981E-14 | 0.96385997 | 0.151 | 0.064 | 4.25367E-10 | KO | Rnf128      | 0.087 |
| Cpox         | 1.39273E-14 | 0.72175641 | 0.092 | 0.029 | 4.32484E-10 | KO | Cpox        | 0.063 |
| Tslp         | 1.41677E-14 | 2.1190562  | 0.025 | 0.002 | 4.39948E-10 | KO | Tslp        | 0.023 |
| Map3k4       | 1.54805E-14 | 0.77711885 | 0.105 | 0.036 | 4.80716E-10 | KO | Map3k4      | 0.069 |
| Ddx10        | 1.6614E-14  | 0.89103999 | 0.156 | 0.066 | 5.15915E-10 | KO | Ddx10       | 0.09  |
| Mut          | 1.76274E-14 | 1.05344926 | 0.116 | 0.042 | 5.47383E-10 | KO | Mut         | 0.074 |
| Mbd5         | 1.80173E-14 | 0.731029   | 0.081 | 0.024 | 5.59491E-10 | KO | Mbd5        | 0.057 |
| Leo1         | 1.92709E-14 | 0.89561749 | 0.101 | 0.034 | 5.98418E-10 | KO | Leo1        | 0.067 |
| Spry2        | 1.98478E-14 | 1.09275827 | 0.059 | 0.013 | 6.16334E-10 | KO | Spry2       | 0.046 |
| Alpk1        | 1.99064E-14 | 0.998132   | 0.064 | 0.016 | 6.18153E-10 | KO | Alpk1       | 0.048 |
| Supt6        | 2.07608E-14 | 0.71431318 | 0.191 | 0.088 | 6.44685E-10 | KO | Supt6       | 0.103 |
| Hdac3        | 2.22147E-14 | 0.82898158 | 0.196 | 0.091 | 6.89833E-10 | KO | Hdac3       | 0.105 |
| Nos2         | 2.43807E-14 | 1.13974809 | 0.097 | 0.033 | 7.57093E-10 | KO | Nos2        | 0.064 |
| Plekhg3      | 2.64451E-14 | 0.82075079 | 0.126 | 0.048 | 8.21201E-10 | KO | Plekhg3     | 0.078 |
| Icos         | 2.78983E-14 | 2.28348307 | 0.037 | 0.005 | 8.66326E-10 | KO | Icos        | 0.032 |
| Dcn          | 2.7989E-14  | 1.30943655 | 0.04  | 0.006 | 8.69144E-10 | KO | Dcn         | 0.034 |
| Cd209e       | 2.91484E-14 | 2.54417939 | 0.017 | 0     | 9.05147E-10 | KO | Cd209e      | 0.017 |
| Lrrc14b      | 2.91484E-14 | 2.1606593  | 0.017 | 0     | 9.05147E-10 | KO | Lrrc14b     | 0.017 |
| Pdcd4        | 3.21556E-14 | 1.21112383 | 0.111 | 0.04  | 9.98528E-10 | KO | Pdcd4       | 0.071 |
| Avpi1        | 3.22624E-14 | 1.07521784 | 0.144 | 0.06  | 1.00184E-09 | KO | Avpi1       | 0.084 |
| Ank          | 3.55958E-14 | 1.13740027 | 0.076 | 0.022 | 1.10536E-09 | KO | Ank         | 0.054 |
| Zbtb2        | 3.72126E-14 | 0.70182647 | 0.069 | 0.018 | 1.15556E-09 | KO | Zbtb2       | 0.051 |
| Il18r1       | 3.85004E-14 | 2.64422086 | 0.033 | 0.004 | 1.19555E-09 | KO | Il18r1      | 0.029 |
| Rasal3       | 3.99079E-14 | 0.75474275 | 0.099 | 0.033 | 1.23926E-09 | KO | Rasal3      | 0.066 |
| Flnb         | 4.04541E-14 | 1.03572145 | 0.057 | 0.013 | 1.25622E-09 | KO | Flnb        | 0.044 |
| Cep135       | 4.17163E-14 | 0.92359326 | 0.083 | 0.025 | 1.29542E-09 | KO | Cep135      | 0.058 |
| Klrb1b       | 4.43172E-14 | 1.59833699 | 0.053 | 0.011 | 1.37618E-09 | KO | Klrb1b      | 0.042 |
| Il18rap      | 4.5161E-14  | 1.0495983  | 0.067 | 0.017 | 1.40239E-09 | KO | Il18rap     | 0.05  |
| Dbp          | 4.99606E-14 | 0.72517635 | 0.093 | 0.031 | 1.55143E-09 | KO | Dbp         | 0.062 |
| Thap12       | 5.11227E-14 | 0.96098395 | 0.144 | 0.06  | 1.58751E-09 | KO | Thap12      | 0.084 |
| Gm12840      | 5.34206E-14 | 1.75119768 | 0.052 | 0.011 | 1.65887E-09 | KO | Gm12840     | 0.041 |
| Sdccag8      | 5.43866E-14 | 0.81868433 | 0.101 | 0.035 | 1.68887E-09 | KO | Sdccag8     | 0.066 |
| Zfp462       | 5.71563E-14 | 1.36480866 | 0.028 | 0.002 | 1.77487E-09 | KO | Zfp462      | 0.026 |
| Ctdspl       | 5.96969E-14 | 1.23768572 | 0.083 | 0.025 | 1.85377E-09 | KO | Ctdspl      | 0.058 |
| Htr7         | 7.34295E-14 | 1.44379666 | 0.032 | 0.004 | 2.2802E-09  | KO | Htr7        | 0.028 |
| Trim5        | 7.40674E-14 | 1.01120565 | 0.064 | 0.016 | 2.30001E-09 | KO | Trim5       | 0.048 |
| Akap7        | 7.62928E-14 | 0.725368   | 0.124 | 0.048 | 2.36912E-09 | KO | Akap7       | 0.076 |

|             |             |            |       |       |             |    |            |       |
|-------------|-------------|------------|-------|-------|-------------|----|------------|-------|
| Plekhg5     | 7.84227E-14 | 2.07348476 | 0.037 | 0.005 | 2.43526E-09 | KO | Plekhg5    | 0.032 |
| 2900089D17F | 8.16677E-14 | 1.78362421 | 0.04  | 0.006 | 2.53603E-09 | KO | 2900089D17 | 0.034 |
| Ticam2      | 8.57272E-14 | 0.70221195 | 0.092 | 0.03  | 2.66209E-09 | KO | Ticam2     | 0.062 |
| Mfap1a      | 8.93443E-14 | 0.76348179 | 0.115 | 0.043 | 2.77441E-09 | KO | Mfap1a     | 0.072 |
| Gm38843     | 9.41424E-14 | 1.48598515 | 0.037 | 0.005 | 2.9234E-09  | KO | Gm38843    | 0.032 |
| Slc41a1     | 9.6184E-14  | 0.90540473 | 0.075 | 0.021 | 2.9868E-09  | KO | Slc41a1    | 0.054 |
| Bex6        | 1.0038E-13  | 1.67091548 | 0.02  | 0.001 | 3.11711E-09 | KO | Bex6       | 0.019 |
| Endou       | 1.00615E-13 | 1.1382336  | 0.02  | 0.001 | 3.12439E-09 | KO | Endou      | 0.019 |
| H2-Ob       | 1.10827E-13 | 2.29278898 | 0.031 | 0.003 | 3.4415E-09  | KO | H2-Ob      | 0.028 |
| Mib2        | 1.12739E-13 | 0.70152372 | 0.079 | 0.023 | 3.50089E-09 | KO | Mib2       | 0.056 |
| Olfr433     | 1.21804E-13 | 1.66022123 | 0.021 | 0.001 | 3.78237E-09 | KO | Olfr433    | 0.02  |
| Dpys        | 1.2261E-13  | 1.8719357  | 0.021 | 0.001 | 3.80742E-09 | KO | Dpys       | 0.02  |
| Ddx4        | 1.23966E-13 | 1.60030725 | 0.021 | 0.001 | 3.84953E-09 | KO | Ddx4       | 0.02  |
| A4galt      | 1.26402E-13 | 2.23281559 | 0.023 | 0.001 | 3.92515E-09 | KO | A4galt     | 0.022 |
| Klre1       | 1.27731E-13 | 2.16614301 | 0.023 | 0.001 | 3.96642E-09 | KO | Klre1      | 0.022 |
| Asb11       | 1.29073E-13 | 1.2587434  | 0.023 | 0.001 | 4.00811E-09 | KO | Asb11      | 0.022 |
| Ggt5        | 1.33877E-13 | 1.30027538 | 0.06  | 0.015 | 4.1573E-09  | KO | Ggt5       | 0.045 |
| Tmem106c    | 1.42204E-13 | 0.69621955 | 0.164 | 0.073 | 4.41585E-09 | KO | Tmem106c   | 0.091 |
| Ccdc191     | 1.4667E-13  | 1.73307834 | 0.039 | 0.006 | 4.55453E-09 | KO | Ccdc191    | 0.033 |
| Pde4dip     | 1.5984E-13  | 0.81338474 | 0.057 | 0.014 | 4.96351E-09 | KO | Pde4dip    | 0.043 |
| Senp7       | 1.60875E-13 | 0.80658147 | 0.093 | 0.032 | 4.99565E-09 | KO | Senp7      | 0.061 |
| Gm13391     | 1.84027E-13 | 0.76567698 | 0.059 | 0.014 | 5.7146E-09  | KO | Gm13391    | 0.045 |
| Ivd         | 2.02169E-13 | 0.91717338 | 0.103 | 0.037 | 6.27796E-09 | KO | Ivd        | 0.066 |
| Hlcs        | 2.39737E-13 | 0.87918775 | 0.087 | 0.028 | 7.44454E-09 | KO | Hlcs       | 0.059 |
| Casp12      | 2.70608E-13 | 0.96914546 | 0.051 | 0.011 | 8.40319E-09 | KO | Casp12     | 0.04  |
| Ccr7        | 2.71397E-13 | 2.06023104 | 0.037 | 0.006 | 8.42768E-09 | KO | Ccr7       | 0.031 |
| Gpr162      | 2.81636E-13 | 1.22682058 | 0.016 | 0     | 8.74564E-09 | KO | Gpr162     | 0.016 |
| Traf3ip3    | 2.87794E-13 | 0.78733462 | 0.064 | 0.017 | 8.93686E-09 | KO | Traf3ip3   | 0.047 |
| Nostrin     | 2.89733E-13 | 0.75990246 | 0.103 | 0.037 | 8.99707E-09 | KO | Nostrin    | 0.066 |
| Polr3d      | 3.0585E-13  | 1.10785857 | 0.077 | 0.023 | 9.49755E-09 | KO | Polr3d     | 0.054 |
| Ttc38       | 3.44745E-13 | 0.96260576 | 0.06  | 0.015 | 1.07054E-08 | KO | Ttc38      | 0.045 |
| Fbxo25      | 3.91478E-13 | 0.72411422 | 0.06  | 0.015 | 1.21566E-08 | KO | Fbxo25     | 0.045 |
| Gm20186     | 3.94193E-13 | 2.49946088 | 0.065 | 0.018 | 1.22409E-08 | KO | Gm20186    | 0.047 |
| Ubxn11      | 4.10243E-13 | 1.847209   | 0.043 | 0.008 | 1.27393E-08 | KO | Ubxn11     | 0.035 |
| Slc9a7      | 4.66221E-13 | 1.64435855 | 0.031 | 0.004 | 1.44776E-08 | KO | Slc9a7     | 0.027 |
| Bckdhb      | 4.9177E-13  | 1.30475109 | 0.064 | 0.017 | 1.52709E-08 | KO | Bckdhb     | 0.047 |
| Hcfc2       | 5.81011E-13 | 0.74211061 | 0.095 | 0.033 | 1.80421E-08 | KO | Hcfc2      | 0.062 |
| Celf4       | 5.85089E-13 | 1.53237282 | 0.025 | 0.002 | 1.81688E-08 | KO | Celf4      | 0.023 |
| Llgl1       | 5.87189E-13 | 0.7358753  | 0.103 | 0.038 | 1.8234E-08  | KO | Llgl1      | 0.065 |
| Mettl17     | 5.95732E-13 | 0.93617758 | 0.053 | 0.012 | 1.84993E-08 | KO | Mettl17    | 0.041 |
| Krt28       | 6.10653E-13 | 1.93711795 | 0.017 | 0     | 1.89626E-08 | KO | Krt28      | 0.017 |
| Upb1        | 6.12175E-13 | 2.18090434 | 0.017 | 0     | 1.90099E-08 | KO | Upb1       | 0.017 |
| Ksr2        | 6.13701E-13 | 1.39048486 | 0.017 | 0     | 1.90573E-08 | KO | Ksr2       | 0.017 |
| Galm        | 6.23771E-13 | 0.91094577 | 0.077 | 0.024 | 1.937E-08   | KO | Galm       | 0.053 |
| Edc4        | 6.38551E-13 | 0.71429241 | 0.138 | 0.058 | 1.98289E-08 | KO | Edc4       | 0.08  |
| Nek1        | 6.62658E-13 | 1.23261218 | 0.056 | 0.014 | 2.05775E-08 | KO | Nek1       | 0.042 |
| Mid1ip1     | 6.82692E-13 | 0.710567   | 0.139 | 0.059 | 2.11996E-08 | KO | Mid1ip1    | 0.08  |
| Rtn1        | 7.54931E-13 | 2.3634779  | 0.024 | 0.002 | 2.34429E-08 | KO | Rtn1       | 0.022 |
| Gm15448     | 7.63568E-13 | 1.21598066 | 0.024 | 0.002 | 2.37111E-08 | KO | Gm15448    | 0.022 |
| Zdhhc13     | 8.95886E-13 | 0.84406845 | 0.101 | 0.037 | 2.78199E-08 | KO | Zdhhc13    | 0.064 |
| Kynu        | 9.17134E-13 | 1.51201411 | 0.019 | 0.001 | 2.84798E-08 | KO | Kynu       | 0.018 |
| Cdyl        | 1.03921E-12 | 1.1728586  | 0.083 | 0.027 | 3.22705E-08 | KO | Cdyl       | 0.056 |
| Adrb2       | 1.07061E-12 | 0.7321874  | 0.16  | 0.073 | 3.32455E-08 | KO | Adrb2      | 0.087 |
| Neil2       | 1.07286E-12 | 2.14478768 | 0.02  | 0.001 | 3.33156E-08 | KO | Neil2      | 0.019 |

|              |             |            |       |       |             |    |             |       |
|--------------|-------------|------------|-------|-------|-------------|----|-------------|-------|
| Cep290       | 1.11232E-12 | 0.85067112 | 0.1   | 0.037 | 3.4541E-08  | KO | Cep290      | 0.063 |
| Slc46a3      | 1.12402E-12 | 1.12841594 | 0.052 | 0.012 | 3.49042E-08 | KO | Slc46a3     | 0.04  |
| Clic5        | 1.2422E-12  | 1.50055866 | 0.028 | 0.003 | 3.85741E-08 | KO | Clic5       | 0.025 |
| Trim30c      | 1.2692E-12  | 1.40991461 | 0.028 | 0.003 | 3.94126E-08 | KO | Trim30c     | 0.025 |
| Krt71        | 1.2713E-12  | 1.37490537 | 0.028 | 0.003 | 3.94778E-08 | KO | Krt71       | 0.025 |
| Wdr82        | 1.29246E-12 | 0.77115754 | 0.14  | 0.06  | 4.01349E-08 | KO | Wdr82       | 0.08  |
| Fam53b       | 1.40732E-12 | 0.73618926 | 0.158 | 0.071 | 4.37016E-08 | KO | Fam53b      | 0.087 |
| Slc25a32     | 1.66932E-12 | 0.74983644 | 0.071 | 0.021 | 5.18375E-08 | KO | Slc25a32    | 0.05  |
| Map3k15      | 1.70899E-12 | 1.50126103 | 0.04  | 0.007 | 5.30692E-08 | KO | Map3k15     | 0.033 |
| Fry          | 1.73181E-12 | 0.88967825 | 0.071 | 0.021 | 5.37778E-08 | KO | Fry         | 0.05  |
| Pdgfc        | 1.77226E-12 | 0.8173839  | 0.154 | 0.07  | 5.50339E-08 | KO | Pdgfc       | 0.084 |
| Socs5        | 1.77949E-12 | 0.76280122 | 0.045 | 0.009 | 5.52586E-08 | KO | Socs5       | 0.036 |
| Ercc6        | 1.79372E-12 | 1.00941646 | 0.063 | 0.017 | 5.57003E-08 | KO | Ercc6       | 0.046 |
| Elmod2       | 1.79527E-12 | 0.70593107 | 0.105 | 0.04  | 5.57487E-08 | KO | Elmod2      | 0.065 |
| Slc20a2      | 1.8809E-12  | 0.74803382 | 0.071 | 0.021 | 5.84075E-08 | KO | Slc20a2     | 0.05  |
| Pcp411       | 1.91255E-12 | 1.8979066  | 0.027 | 0.003 | 5.93905E-08 | KO | Pcp411      | 0.024 |
| Cacnb4       | 2.03636E-12 | 1.06023699 | 0.027 | 0.003 | 6.3235E-08  | KO | Cacnb4      | 0.024 |
| Tmem64       | 2.12495E-12 | 0.84078464 | 0.061 | 0.017 | 6.59862E-08 | KO | Tmem64      | 0.044 |
| Ikzf2        | 2.54345E-12 | 1.30940665 | 0.053 | 0.013 | 7.89816E-08 | KO | Ikzf2       | 0.04  |
| Zbtb1        | 2.88591E-12 | 0.74883901 | 0.083 | 0.028 | 8.96163E-08 | KO | Zbtb1       | 0.055 |
| Prss46       | 3.10425E-12 | 1.75502548 | 0.032 | 0.005 | 9.63963E-08 | KO | Prss46      | 0.027 |
| Maml2        | 3.20253E-12 | 1.16710916 | 0.064 | 0.018 | 9.94483E-08 | KO | Maml2       | 0.046 |
| Gucd1        | 3.2143E-12  | 0.73391674 | 0.093 | 0.033 | 9.98137E-08 | KO | Gucd1       | 0.06  |
| Cmah         | 4.32826E-12 | 1.38023178 | 0.024 | 0.002 | 1.34406E-07 | KO | Cmah        | 0.022 |
| Capn15       | 4.34387E-12 | 0.96922774 | 0.079 | 0.026 | 1.3489E-07  | KO | Capn15      | 0.053 |
| Cd5l         | 4.73284E-12 | 2.09980744 | 0.041 | 0.008 | 1.46969E-07 | KO | Cd5l        | 0.033 |
| Lif          | 4.74147E-12 | 3.05568366 | 0.028 | 0.003 | 1.47237E-07 | KO | Lif         | 0.025 |
| Tmco6        | 4.77591E-12 | 0.79342654 | 0.049 | 0.011 | 1.48306E-07 | KO | Tmco6       | 0.038 |
| Oas1g        | 4.81668E-12 | 0.80925506 | 0.065 | 0.019 | 1.49572E-07 | KO | Oas1g       | 0.046 |
| Fndc7        | 4.95684E-12 | 1.69447351 | 0.028 | 0.003 | 1.53925E-07 | KO | Fndc7       | 0.025 |
| Ctsw         | 5.73731E-12 | 2.30850405 | 0.031 | 0.004 | 1.78161E-07 | KO | Ctsw        | 0.027 |
| Siglech      | 5.76534E-12 | 3.0841516  | 0.016 | 0     | 1.79031E-07 | KO | Siglech     | 0.016 |
| Tgtp1        | 5.83712E-12 | 1.60694382 | 0.016 | 0     | 1.8126E-07  | KO | Tgtp1       | 0.016 |
| C1qtnf1      | 5.93759E-12 | 1.50069604 | 0.023 | 0.002 | 1.8438E-07  | KO | C1qtnf1     | 0.021 |
| Lrrc20       | 6.30041E-12 | 1.2925554  | 0.037 | 0.007 | 1.95646E-07 | KO | Lrrc20      | 0.03  |
| 1700061G19F  | 7.81923E-12 | 1.22943424 | 0.021 | 0.002 | 2.42811E-07 | KO | 1700061G19  | 0.019 |
| 4930512J16Ri | 7.94134E-12 | 0.6933082  | 0.021 | 0.002 | 2.46602E-07 | KO | 4930512J16f | 0.019 |
| Cbarp        | 8.23828E-12 | 2.49035311 | 0.027 | 0.003 | 2.55823E-07 | KO | Cbarp       | 0.024 |
| Gm16094      | 8.3635E-12  | 1.4348399  | 0.017 | 0.001 | 2.59712E-07 | KO | Gm16094     | 0.016 |
| 4631405K08R  | 8.49846E-12 | 2.1577981  | 0.017 | 0.001 | 2.63903E-07 | KO | 4631405K08  | 0.016 |
| Cd200r3      | 8.53742E-12 | 1.31175428 | 0.017 | 0.001 | 2.65112E-07 | KO | Cd200r3     | 0.016 |
| Al839979     | 8.63006E-12 | 0.81607775 | 0.056 | 0.015 | 2.67989E-07 | KO | Al839979    | 0.041 |
| Vwa8         | 9.1628E-12  | 0.70844102 | 0.095 | 0.035 | 2.84532E-07 | KO | Vwa8        | 0.06  |
| Tnfsf8       | 9.19284E-12 | 1.76940784 | 0.02  | 0.001 | 2.85465E-07 | KO | Tnfsf8      | 0.019 |
| Zfp322a      | 9.25722E-12 | 0.7853781  | 0.085 | 0.03  | 2.87464E-07 | KO | Zfp322a     | 0.055 |
| Gm12216      | 1.04971E-11 | 0.809283   | 0.048 | 0.011 | 3.25965E-07 | KO | Gm12216     | 0.037 |
| Stat4        | 1.05216E-11 | 1.25461005 | 0.029 | 0.004 | 3.26728E-07 | KO | Stat4       | 0.025 |
| Kbtbd11      | 1.11732E-11 | 1.88015587 | 0.041 | 0.008 | 3.46962E-07 | KO | Kbtbd11     | 0.033 |
| Ints7        | 1.19106E-11 | 0.99018687 | 0.093 | 0.035 | 3.6986E-07  | KO | Ints7       | 0.058 |
| Gm9733       | 1.19715E-11 | 1.01074887 | 0.08  | 0.027 | 3.71751E-07 | KO | Gm9733      | 0.053 |
| Macrocl1     | 1.25873E-11 | 0.98608042 | 0.06  | 0.017 | 3.90873E-07 | KO | Macrocl1    | 0.043 |
| Ifitm6       | 1.27692E-11 | 0.96178004 | 0.084 | 0.03  | 3.96521E-07 | KO | Ifitm6      | 0.054 |
| Gm46224      | 1.39329E-11 | 0.76595756 | 0.084 | 0.03  | 4.32658E-07 | KO | Gm46224     | 0.054 |
| Kat6b        | 1.44206E-11 | 0.81974394 | 0.081 | 0.028 | 4.47803E-07 | KO | Kat6b       | 0.053 |

|             |             |            |       |       |                |            |       |
|-------------|-------------|------------|-------|-------|----------------|------------|-------|
| Clec2i      | 1.44339E-11 | 0.90042671 | 0.087 | 0.031 | 4.48217E-07 KO | Clec2i     | 0.056 |
| Neurl4      | 1.44821E-11 | 0.73947758 | 0.089 | 0.033 | 4.49714E-07 KO | Neurl4     | 0.056 |
| Kdm2b       | 1.48632E-11 | 0.7027325  | 0.183 | 0.092 | 4.61546E-07 KO | Kdm2b      | 0.091 |
| Cd2         | 1.52048E-11 | 1.73782481 | 0.033 | 0.005 | 4.72155E-07 KO | Cd2        | 0.028 |
| Nhsl2       | 1.57891E-11 | 1.10593334 | 0.053 | 0.014 | 4.903E-07 KO   | Nhsl2      | 0.039 |
| Pi16        | 1.65594E-11 | 1.28182881 | 0.037 | 0.007 | 5.14218E-07 KO | Pi16       | 0.03  |
| Bcl9        | 1.70204E-11 | 1.22196713 | 0.053 | 0.014 | 5.28534E-07 KO | Bcl9       | 0.039 |
| Ptgfrn      | 1.78875E-11 | 0.74610627 | 0.044 | 0.01  | 5.55461E-07 KO | Ptgfrn     | 0.034 |
| Gm28809     | 2.13206E-11 | 1.25635928 | 0.024 | 0.002 | 6.6207E-07 KO  | Gm28809    | 0.022 |
| Tbc1d32     | 2.14711E-11 | 0.95994241 | 0.06  | 0.017 | 6.66742E-07 KO | Tbc1d32    | 0.043 |
| Fcho1       | 2.48001E-11 | 1.14816853 | 0.065 | 0.02  | 7.70118E-07 KO | Fcho1      | 0.045 |
| 1110034G24F | 2.53886E-11 | 0.96275462 | 0.064 | 0.019 | 7.88392E-07 KO | 1110034G24 | 0.045 |
| Mettl25     | 2.61433E-11 | 0.72573051 | 0.04  | 0.008 | 8.11828E-07 KO | Mettl25    | 0.032 |
| Gm8113      | 2.64792E-11 | 2.46456251 | 0.013 | 0     | 8.2226E-07 KO  | Gm8113     | 0.013 |
| Cd209c      | 2.64792E-11 | 1.74741944 | 0.013 | 0     | 8.2226E-07 KO  | Cd209c     | 0.013 |
| Serpnb6b    | 2.69605E-11 | 2.41304418 | 0.041 | 0.009 | 8.37203E-07 KO | Serpnb6b   | 0.032 |
| Hectd4      | 2.83802E-11 | 0.88621052 | 0.079 | 0.027 | 8.81292E-07 KO | Hectd4     | 0.052 |
| Trim56      | 2.85207E-11 | 0.80793876 | 0.108 | 0.044 | 8.85653E-07 KO | Trim56     | 0.064 |
| Gpr84       | 3.19847E-11 | 1.25228928 | 0.023 | 0.002 | 9.9322E-07 KO  | Gpr84      | 0.021 |
| Txk         | 3.29613E-11 | 1.17750508 | 0.027 | 0.003 | 1.02355E-06 KO | Txk        | 0.024 |
| Rpl3l       | 3.35278E-11 | 1.16680341 | 0.027 | 0.003 | 1.04114E-06 KO | Rpl3l      | 0.024 |
| Tenm4       | 3.52831E-11 | 1.28197099 | 0.029 | 0.004 | 1.09564E-06 KO | Tenm4      | 0.025 |
| Gm15445     | 3.65729E-11 | 1.32585128 | 0.029 | 0.004 | 1.1357E-06 KO  | Gm15445    | 0.025 |
| Gm19705     | 3.72388E-11 | 0.71499655 | 0.06  | 0.017 | 1.15638E-06 KO | Gm19705    | 0.043 |
| Sirpb1a     | 4.08922E-11 | 0.83372685 | 0.072 | 0.024 | 1.26982E-06 KO | Sirpb1a    | 0.048 |
| Cd226       | 4.50242E-11 | 1.73192111 | 0.021 | 0.002 | 1.39814E-06 KO | Cd226      | 0.019 |
| Dmkn        | 4.8375E-11  | 1.12798506 | 0.033 | 0.006 | 1.50219E-06 KO | Dmkn       | 0.027 |
| Nprl3       | 4.86168E-11 | 1.28499075 | 0.056 | 0.016 | 1.5097E-06 KO  | Nprl3      | 0.04  |
| Cd55        | 4.95008E-11 | 3.09253172 | 0.025 | 0.003 | 1.53715E-06 KO | Cd55       | 0.022 |
| Mepce       | 5.18669E-11 | 0.81183456 | 0.121 | 0.053 | 1.61062E-06 KO | Mepce      | 0.068 |
| Acad11      | 5.20982E-11 | 0.76405855 | 0.039 | 0.008 | 1.6178E-06 KO  | Acad11     | 0.031 |
| Cyp2ab1     | 5.5645E-11  | 1.73889463 | 0.015 | 0     | 1.72795E-06 KO | Cyp2ab1    | 0.015 |
| St18        | 5.61063E-11 | 1.44820846 | 0.025 | 0.003 | 1.74227E-06 KO | St18       | 0.022 |
| Slc2a9      | 5.75892E-11 | 1.0297764  | 0.053 | 0.014 | 1.78832E-06 KO | Slc2a9     | 0.039 |
| Lsmem1      | 6.14473E-11 | 1.46598281 | 0.02  | 0.002 | 1.90812E-06 KO | Lsmem1     | 0.018 |
| Hs3st3b1    | 6.2034E-11  | 1.01938245 | 0.02  | 0.002 | 1.92634E-06 KO | Hs3st3b1   | 0.018 |
| Kif9        | 6.27706E-11 | 0.72311836 | 0.031 | 0.005 | 1.94922E-06 KO | Kif9       | 0.026 |
| Abtb2       | 6.3222E-11  | 0.97263711 | 0.059 | 0.017 | 1.96323E-06 KO | Abtb2      | 0.042 |
| Pogk        | 6.34032E-11 | 0.80641416 | 0.052 | 0.014 | 1.96886E-06 KO | Pogk       | 0.038 |
| Zfp456      | 6.36321E-11 | 1.64398639 | 0.028 | 0.004 | 1.97597E-06 KO | Zfp456     | 0.024 |
| Hpn         | 6.42853E-11 | 1.66127974 | 0.028 | 0.004 | 1.99625E-06 KO | Hpn        | 0.024 |
| Thap1       | 6.56412E-11 | 1.05682884 | 0.059 | 0.017 | 2.03836E-06 KO | Thap1      | 0.042 |
| Ikzf3       | 7.17769E-11 | 3.02930498 | 0.019 | 0.001 | 2.22889E-06 KO | Ikzf3      | 0.018 |
| Slc9a4      | 7.35739E-11 | 1.0171158  | 0.044 | 0.01  | 2.28469E-06 KO | Slc9a4     | 0.034 |
| Gm13710     | 7.44981E-11 | 0.722228   | 0.044 | 0.01  | 2.31339E-06 KO | Gm13710    | 0.034 |
| Matn4       | 7.46992E-11 | 2.37749903 | 0.019 | 0.001 | 2.31964E-06 KO | Matn4      | 0.018 |
| Il27ra      | 7.65082E-11 | 1.12330194 | 0.019 | 0.001 | 2.37581E-06 KO | Il27ra     | 0.018 |
| Gprc5a      | 7.97616E-11 | 2.2185436  | 0.017 | 0.001 | 2.47684E-06 KO | Gprc5a     | 0.016 |
| Klhl33      | 8.21543E-11 | 2.05268368 | 0.017 | 0.001 | 2.55114E-06 KO | Klhl33     | 0.016 |
| Cbx7        | 8.67608E-11 | 1.27990866 | 0.032 | 0.005 | 2.69418E-06 KO | Cbx7       | 0.027 |
| Hacd3       | 8.78972E-11 | 0.99150315 | 0.109 | 0.046 | 2.72947E-06 KO | Hacd3      | 0.063 |
| Fpr2        | 9.8552E-11  | 1.57419218 | 0.103 | 0.043 | 3.06033E-06 KO | Fpr2       | 0.06  |
| Hif1an      | 1.05785E-10 | 0.96424366 | 0.085 | 0.032 | 3.28493E-06 KO | Hif1an     | 0.053 |
| Atp11a      | 1.10584E-10 | 0.86360845 | 0.127 | 0.057 | 3.43395E-06 KO | Atp11a     | 0.07  |

|              |             |            |       |       |             |    |             |       |
|--------------|-------------|------------|-------|-------|-------------|----|-------------|-------|
| Cebpe        | 1.124E-10   | 1.58571077 | 0.027 | 0.004 | 3.49037E-06 | KO | Cebpe       | 0.023 |
| Plekhf1      | 1.16319E-10 | 1.3480085  | 0.033 | 0.006 | 3.61204E-06 | KO | Plekhf1     | 0.027 |
| Gm15247      | 1.17344E-10 | 1.0123156  | 0.027 | 0.004 | 3.64387E-06 | KO | Gm15247     | 0.023 |
| Rrp12        | 1.24961E-10 | 1.09390141 | 0.088 | 0.034 | 3.88042E-06 | KO | Rrp12       | 0.054 |
| Tbc1d12      | 1.27555E-10 | 0.78614983 | 0.04  | 0.009 | 3.96097E-06 | KO | Tbc1d12     | 0.031 |
| Slc5a3       | 1.27598E-10 | 1.51451478 | 0.045 | 0.011 | 3.9623E-06  | KO | Slc5a3      | 0.034 |
| Usf3         | 1.29428E-10 | 0.97337581 | 0.081 | 0.03  | 4.01911E-06 | KO | Usf3        | 0.051 |
| Pex11a       | 1.33326E-10 | 0.87741212 | 0.051 | 0.014 | 4.14018E-06 | KO | Pex11a      | 0.037 |
| Zfp719       | 1.42612E-10 | 0.85906615 | 0.041 | 0.009 | 4.42853E-06 | KO | Zfp719      | 0.032 |
| Nlrp1b       | 1.43234E-10 | 1.20114422 | 0.044 | 0.011 | 4.44785E-06 | KO | Nlrp1b      | 0.033 |
| Dnajc27      | 1.46561E-10 | 0.90988477 | 0.043 | 0.01  | 4.55116E-06 | KO | Dnajc27     | 0.033 |
| Sectm1a      | 1.47371E-10 | 0.77034545 | 0.056 | 0.016 | 4.57632E-06 | KO | Sectm1a     | 0.04  |
| Afap1        | 1.51917E-10 | 1.08265232 | 0.045 | 0.011 | 4.71746E-06 | KO | Afap1       | 0.034 |
| B3galnt2     | 1.63233E-10 | 0.82843012 | 0.055 | 0.016 | 5.06887E-06 | KO | B3galnt2    | 0.039 |
| Cd4          | 1.64292E-10 | 1.30979663 | 0.031 | 0.005 | 5.10176E-06 | KO | Cd4         | 0.026 |
| Ythdc2       | 1.80316E-10 | 0.6932579  | 0.092 | 0.036 | 5.59935E-06 | KO | Ythdc2      | 0.056 |
| Al987944     | 1.84773E-10 | 0.78377901 | 0.068 | 0.023 | 5.73775E-06 | KO | Al987944    | 0.045 |
| Kif1a        | 2.31276E-10 | 1.04499445 | 0.021 | 0.002 | 7.18181E-06 | KO | Kif1a       | 0.019 |
| Cenpj        | 2.45799E-10 | 1.0545945  | 0.039 | 0.008 | 7.63279E-06 | KO | Cenpj       | 0.031 |
| Fam208b      | 2.47096E-10 | 0.8543879  | 0.083 | 0.031 | 7.67306E-06 | KO | Fam208b     | 0.052 |
| Itln1        | 2.58018E-10 | 2.23701947 | 0.012 | 0     | 8.01223E-06 | KO | Itln1       | 0.012 |
| Brpf3        | 2.66724E-10 | 1.2550059  | 0.06  | 0.019 | 8.28259E-06 | KO | Brpf3       | 0.041 |
| Epg5         | 2.8837E-10  | 0.82672866 | 0.071 | 0.024 | 8.95476E-06 | KO | Epg5        | 0.047 |
| Igip         | 3.26283E-10 | 2.00092258 | 0.035 | 0.007 | 1.01321E-05 | KO | Igip        | 0.028 |
| Atp10a       | 3.458E-10   | 1.76737902 | 0.024 | 0.003 | 1.07381E-05 | KO | Atp10a      | 0.021 |
| Gzmb         | 3.58226E-10 | 2.69533596 | 0.027 | 0.004 | 1.1124E-05  | KO | Gzmb        | 0.023 |
| Sh3d19       | 3.77054E-10 | 1.33066644 | 0.027 | 0.004 | 1.17086E-05 | KO | Sh3d19      | 0.023 |
| Tecpr2       | 4.15825E-10 | 0.84279631 | 0.051 | 0.014 | 1.29126E-05 | KO | Tecpr2      | 0.037 |
| Grasp        | 4.18176E-10 | 1.47086098 | 0.036 | 0.008 | 1.29856E-05 | KO | Grasp       | 0.028 |
| Creb3l2      | 4.71025E-10 | 0.73164117 | 0.071 | 0.025 | 1.46267E-05 | KO | Creb3l2     | 0.046 |
| Enkur        | 5.26461E-10 | 1.48280053 | 0.013 | 0     | 1.63482E-05 | KO | Enkur       | 0.013 |
| Gm34425      | 5.27745E-10 | 0.83791416 | 0.013 | 0     | 1.63881E-05 | KO | Gm34425     | 0.013 |
| Myrf         | 5.29033E-10 | 1.09765392 | 0.013 | 0     | 1.64281E-05 | KO | Myrf        | 0.013 |
| Fcor         | 5.43675E-10 | 0.95966893 | 0.041 | 0.01  | 1.68828E-05 | KO | Fcor        | 0.031 |
| Pdcl         | 5.48484E-10 | 0.7013004  | 0.115 | 0.051 | 1.70321E-05 | KO | Pdcl        | 0.064 |
| Polk         | 5.53131E-10 | 1.11144228 | 0.067 | 0.023 | 1.71764E-05 | KO | Polk        | 0.044 |
| AC165953.2   | 5.59308E-10 | 1.03614194 | 0.04  | 0.009 | 1.73682E-05 | KO | AC165953.2  | 0.031 |
| Tbc1d22b     | 5.90853E-10 | 0.71168843 | 0.08  | 0.03  | 1.83478E-05 | KO | Tbc1d22b    | 0.05  |
| Mis12        | 5.91396E-10 | 1.01228678 | 0.099 | 0.042 | 1.83646E-05 | KO | Mis12       | 0.057 |
| Tgif2        | 6.09029E-10 | 0.96793017 | 0.028 | 0.005 | 1.89122E-05 | KO | Tgif2       | 0.023 |
| 4933430I17Ri | 6.19609E-10 | 0.9949619  | 0.017 | 0.001 | 1.92407E-05 | KO | 4933430I17F | 0.016 |
| Dync1li2     | 6.58684E-10 | 0.72011864 | 0.126 | 0.058 | 2.04541E-05 | KO | Dync1li2    | 0.068 |
| Frm6         | 6.73879E-10 | 0.86171075 | 0.052 | 0.015 | 2.09259E-05 | KO | Frm6        | 0.037 |
| Gm2814       | 6.95072E-10 | 1.58741277 | 0.015 | 0.001 | 2.15841E-05 | KO | Gm2814      | 0.014 |
| Klra7        | 6.95607E-10 | 2.94273039 | 0.016 | 0.001 | 2.16007E-05 | KO | Klra7       | 0.015 |
| Lmtk3        | 6.96621E-10 | 2.14484909 | 0.015 | 0.001 | 2.16322E-05 | KO | Lmtk3       | 0.014 |
| Gprc5c       | 7.10179E-10 | 1.4277425  | 0.016 | 0.001 | 2.20532E-05 | KO | Gprc5c      | 0.015 |
| Slc36a2      | 7.13129E-10 | 1.24011409 | 0.016 | 0.001 | 2.21448E-05 | KO | Slc36a2     | 0.015 |
| Tmeff1       | 7.2205E-10  | 1.3431996  | 0.016 | 0.001 | 2.24218E-05 | KO | Tmeff1      | 0.015 |
| Faah         | 7.23548E-10 | 1.0292084  | 0.016 | 0.001 | 2.24683E-05 | KO | Faah        | 0.015 |
| Map3k5       | 7.41337E-10 | 0.86264512 | 0.088 | 0.035 | 2.30207E-05 | KO | Map3k5      | 0.053 |
| Trim36       | 7.56745E-10 | 0.95183838 | 0.049 | 0.014 | 2.34992E-05 | KO | Trim36      | 0.035 |
| Stk39        | 8.20284E-10 | 1.1341584  | 0.048 | 0.013 | 2.54723E-05 | KO | Stk39       | 0.035 |
| Setdb2       | 8.26707E-10 | 0.9783096  | 0.055 | 0.017 | 2.56717E-05 | KO | Setdb2      | 0.038 |

|              |             |            |       |       |             |    |             |       |
|--------------|-------------|------------|-------|-------|-------------|----|-------------|-------|
| Gm4610       | 9.92474E-10 | 1.33606981 | 0.021 | 0.002 | 3.08193E-05 | KO | Gm4610      | 0.019 |
| Mon1a        | 1.02938E-09 | 1.3651008  | 0.06  | 0.02  | 3.19653E-05 | KO | Mon1a       | 0.04  |
| Gm44751      | 1.03642E-09 | 0.94739973 | 0.037 | 0.008 | 3.2184E-05  | KO | Gm44751     | 0.029 |
| Cd1d1        | 1.08632E-09 | 1.27363655 | 0.031 | 0.006 | 3.37335E-05 | KO | Cd1d1       | 0.025 |
| Krt17        | 1.11938E-09 | 1.24888102 | 0.027 | 0.004 | 3.476E-05   | KO | Krt17       | 0.023 |
| AC163018.1   | 1.15034E-09 | 1.38317606 | 0.027 | 0.004 | 3.57214E-05 | KO | AC163018.1  | 0.023 |
| Slx4ip       | 1.18202E-09 | 0.69784864 | 0.06  | 0.02  | 3.67052E-05 | KO | Slx4ip      | 0.04  |
| Tnfsf13b     | 1.2363E-09  | 0.7762128  | 0.069 | 0.025 | 3.83907E-05 | KO | Tnfsf13b    | 0.044 |
| Sigirr       | 1.42222E-09 | 1.2574081  | 0.032 | 0.006 | 4.41643E-05 | KO | Sigirr      | 0.026 |
| Pdcd7        | 1.50786E-09 | 0.75207054 | 0.092 | 0.038 | 4.68236E-05 | KO | Pdcd7       | 0.054 |
| Zdhhc23      | 1.60936E-09 | 1.42674522 | 0.028 | 0.005 | 4.99755E-05 | KO | Zdhhc23     | 0.023 |
| Bcam         | 1.61819E-09 | 0.9934238  | 0.02  | 0.002 | 5.02497E-05 | KO | Bcam        | 0.018 |
| Glul         | 1.67206E-09 | 0.72639783 | 0.454 | 0.31  | 5.19225E-05 | KO | Glul        | 0.144 |
| Abcb1b       | 1.73292E-09 | 0.71229339 | 0.095 | 0.04  | 5.38123E-05 | KO | Abcb1b      | 0.055 |
| Nlk          | 1.83801E-09 | 0.71354619 | 0.083 | 0.033 | 5.70757E-05 | KO | Nlk         | 0.05  |
| Pigh         | 1.91531E-09 | 1.27389417 | 0.036 | 0.008 | 5.94762E-05 | KO | Pigh        | 0.028 |
| Fn1          | 2.07463E-09 | 1.67716496 | 0.326 | 0.225 | 6.44234E-05 | KO | Fn1         | 0.101 |
| Tmem150b     | 2.19507E-09 | 0.9516538  | 0.023 | 0.003 | 6.81634E-05 | KO | Tmem150b    | 0.02  |
| Foxp4        | 2.22933E-09 | 1.26957371 | 0.069 | 0.025 | 6.92273E-05 | KO | Foxp4       | 0.044 |
| Lin54        | 2.25155E-09 | 0.7279906  | 0.135 | 0.066 | 6.99173E-05 | KO | Lin54       | 0.069 |
| Gm37800      | 2.26547E-09 | 1.13354936 | 0.023 | 0.003 | 7.03495E-05 | KO | Gm37800     | 0.02  |
| Prf1         | 2.36511E-09 | 2.56306229 | 0.019 | 0.002 | 7.34437E-05 | KO | Prf1        | 0.017 |
| Folr2        | 2.43642E-09 | 0.94183786 | 0.342 | 0.239 | 7.56582E-05 | KO | Folr2       | 0.103 |
| Slc22a23     | 2.46605E-09 | 1.97339876 | 0.019 | 0.002 | 7.65784E-05 | KO | Slc22a23    | 0.017 |
| Gm26756      | 2.52572E-09 | 1.42020722 | 0.011 | 0     | 7.84313E-05 | KO | Gm26756     | 0.011 |
| Zfp180       | 2.61425E-09 | 0.90325572 | 0.075 | 0.028 | 8.11803E-05 | KO | Zfp180      | 0.047 |
| Padi2        | 2.61822E-09 | 0.98116468 | 0.053 | 0.017 | 8.13034E-05 | KO | Padi2       | 0.036 |
| Chn2         | 2.88313E-09 | 1.736493   | 0.043 | 0.011 | 8.95297E-05 | KO | Chn2        | 0.032 |
| Kantr        | 3.31796E-09 | 1.23308934 | 0.032 | 0.007 | 0.000103033 | KO | Kantr       | 0.025 |
| Tns4         | 3.37526E-09 | 0.79528361 | 0.045 | 0.013 | 0.000104812 | KO | Tns4        | 0.032 |
| Ifi214       | 3.38302E-09 | 0.8502213  | 0.032 | 0.007 | 0.000105053 | KO | Ifi214      | 0.025 |
| Zfp84        | 3.56491E-09 | 0.69546926 | 0.051 | 0.015 | 0.000110701 | KO | Zfp84       | 0.036 |
| Gpd1l        | 3.56797E-09 | 0.70880276 | 0.112 | 0.051 | 0.000110796 | KO | Gpd1l       | 0.061 |
| Pofut1       | 3.70077E-09 | 0.90767571 | 0.108 | 0.049 | 0.00011492  | KO | Pofut1      | 0.059 |
| Rrad         | 3.79714E-09 | 1.20830735 | 0.04  | 0.01  | 0.000117913 | KO | Rrad        | 0.03  |
| Pkp3         | 3.82216E-09 | 0.74533809 | 0.044 | 0.012 | 0.00011869  | KO | Pkp3        | 0.032 |
| Gpr155       | 4.05028E-09 | 1.32860612 | 0.037 | 0.009 | 0.000125773 | KO | Gpr155      | 0.028 |
| Pyroxd2      | 4.16682E-09 | 1.00182616 | 0.037 | 0.009 | 0.000129392 | KO | Pyroxd2     | 0.028 |
| Adcy9        | 4.16795E-09 | 0.82641184 | 0.036 | 0.008 | 0.000129427 | KO | Adcy9       | 0.028 |
| Cdc14a       | 4.702E-09   | 1.71479724 | 0.059 | 0.02  | 0.000146011 | KO | Cdc14a      | 0.039 |
| Ccdc171      | 4.90145E-09 | 1.69805254 | 0.016 | 0.001 | 0.000152205 | KO | Ccdc171     | 0.015 |
| Mt3          | 4.95573E-09 | 2.86264521 | 0.012 | 0     | 0.00015389  | KO | Mt3         | 0.012 |
| St8sia1      | 4.96741E-09 | 2.31786533 | 0.016 | 0.001 | 0.000154253 | KO | St8sia1     | 0.015 |
| Mab21l3      | 4.99174E-09 | 1.19973831 | 0.012 | 0     | 0.000155008 | KO | Mab21l3     | 0.012 |
| Cdh23        | 5.028E-09   | 0.84317109 | 0.012 | 0     | 0.000156135 | KO | Cdh23       | 0.012 |
| Ppargc1b     | 5.83484E-09 | 0.79636251 | 0.061 | 0.021 | 0.000181189 | KO | Ppargc1b    | 0.04  |
| Il4i1        | 6.01702E-09 | 2.20460242 | 0.015 | 0.001 | 0.000186847 | KO | Il4i1       | 0.014 |
| Bcl2a1c      | 6.06607E-09 | 1.07754749 | 0.015 | 0.001 | 0.00018837  | KO | Bcl2a1c     | 0.014 |
| Dpt          | 6.11551E-09 | 1.23604616 | 0.015 | 0.001 | 0.000189905 | KO | Dpt         | 0.014 |
| Kcnq1        | 6.31535E-09 | 1.85180256 | 0.013 | 0.001 | 0.000196111 | KO | Kcnq1       | 0.012 |
| Ripor3       | 6.31535E-09 | 1.05944081 | 0.013 | 0.001 | 0.000196111 | KO | Ripor3      | 0.012 |
| Gm13373      | 6.53684E-09 | 1.59821048 | 0.02  | 0.002 | 0.000202988 | KO | Gm13373     | 0.018 |
| 5830416l19Ri | 6.62008E-09 | 1.50213336 | 0.02  | 0.002 | 0.000205573 | KO | 5830416l19F | 0.018 |
| Rsph9        | 6.78966E-09 | 0.87877328 | 0.02  | 0.002 | 0.000210839 | KO | Rsph9       | 0.018 |

|         |             |            |       |       |             |    |         |       |
|---------|-------------|------------|-------|-------|-------------|----|---------|-------|
| Tbc1d4  | 6.81757E-09 | 1.19259528 | 0.071 | 0.027 | 0.000211706 | KO | Tbc1d4  | 0.044 |
| Gvin1   | 6.83272E-09 | 0.79807138 | 0.02  | 0.002 | 0.000212176 | KO | Gvin1   | 0.018 |
| MIh1    | 7.08935E-09 | 0.90439183 | 0.069 | 0.026 | 0.000220146 | KO | MIh1    | 0.043 |
| Invs    | 7.26499E-09 | 0.81791259 | 0.032 | 0.007 | 0.0002256   | KO | Invs    | 0.025 |
| Trac    | 7.3053E-09  | 0.95259797 | 0.032 | 0.007 | 0.000226851 | KO | Trac    | 0.025 |
| Rasal2  | 7.45282E-09 | 0.77706    | 0.04  | 0.011 | 0.000231432 | KO | Rasal2  | 0.029 |
| Ipcef1  | 8.33322E-09 | 0.98403838 | 0.027 | 0.005 | 0.000258771 | KO | Ipcef1  | 0.022 |
| Rnf8    | 8.38862E-09 | 0.93932908 | 0.096 | 0.042 | 0.000260492 | KO | Rnf8    | 0.054 |
| Lztr1   | 8.39146E-09 | 0.76626989 | 0.081 | 0.033 | 0.00026058  | KO | Lztr1   | 0.048 |
| Nrg2    | 8.39928E-09 | 1.06992168 | 0.051 | 0.016 | 0.000260823 | KO | Nrg2    | 0.035 |
| Ahi1    | 8.40515E-09 | 1.05127832 | 0.047 | 0.014 | 0.000261005 | KO | Ahi1    | 0.033 |
| Fam169b | 1.11434E-08 | 1.18419907 | 0.019 | 0.002 | 0.000346036 | KO | Fam169b | 0.017 |
| Fam71a  | 1.12897E-08 | 0.87044944 | 0.019 | 0.002 | 0.00035058  | KO | Fam71a  | 0.017 |
| Npy     | 1.18297E-08 | 1.00455508 | 0.068 | 0.026 | 0.000367348 | KO | Npy     | 0.042 |
| Gtf3c5  | 1.2175E-08  | 0.96192906 | 0.048 | 0.015 | 0.00037807  | KO | Gtf3c5  | 0.033 |
| Gfod1   | 1.22431E-08 | 1.41127688 | 0.029 | 0.006 | 0.000380185 | KO | Gfod1   | 0.023 |
| Sp4     | 1.22796E-08 | 1.33758245 | 0.048 | 0.015 | 0.000381319 | KO | Sp4     | 0.033 |
| Ttll4   | 1.39175E-08 | 0.9556122  | 0.051 | 0.016 | 0.000432179 | KO | Ttll4   | 0.035 |
| Cp      | 1.45737E-08 | 1.92242699 | 0.063 | 0.023 | 0.000452558 | KO | Cp      | 0.04  |
| Adra1a  | 1.64136E-08 | 0.7790659  | 0.033 | 0.008 | 0.000509692 | KO | Adra1a  | 0.025 |
| Hacl1   | 1.67929E-08 | 0.83122352 | 0.033 | 0.008 | 0.000521471 | KO | Hacl1   | 0.025 |
| Abcb9   | 1.74513E-08 | 2.27771598 | 0.017 | 0.002 | 0.000541915 | KO | Abcb9   | 0.015 |
| Gm43660 | 1.81129E-08 | 1.36351116 | 0.017 | 0.002 | 0.00056246  | KO | Gm43660 | 0.015 |
| Hemk1   | 2.06082E-08 | 1.29268505 | 0.041 | 0.012 | 0.000639945 | KO | Hemk1   | 0.029 |
| Usp20   | 2.12823E-08 | 0.8659617  | 0.043 | 0.012 | 0.000660879 | KO | Usp20   | 0.031 |
| Scnn1a  | 2.13568E-08 | 1.2142659  | 0.027 | 0.005 | 0.000663194 | KO | Scnn1a  | 0.022 |
| Slc1a5  | 2.15759E-08 | 0.7887357  | 0.135 | 0.07  | 0.000669996 | KO | Slc1a5  | 0.065 |
| Fxyd2   | 2.29195E-08 | 2.23731113 | 0.055 | 0.019 | 0.000711721 | KO | Fxyd2   | 0.036 |
| Spaca6  | 2.43482E-08 | 1.02620528 | 0.02  | 0.003 | 0.000756085 | KO | Spaca6  | 0.017 |
| Dhx57   | 2.47555E-08 | 0.97705807 | 0.056 | 0.02  | 0.000768733 | KO | Dhx57   | 0.036 |
| Scfd2   | 2.49955E-08 | 0.70089147 | 0.047 | 0.014 | 0.000776186 | KO | Scfd2   | 0.033 |
| Spata5  | 2.6316E-08  | 0.86892407 | 0.064 | 0.024 | 0.000817191 | KO | Spata5  | 0.04  |
| Pank4   | 2.63217E-08 | 0.86299435 | 0.049 | 0.016 | 0.000817366 | KO | Pank4   | 0.033 |
| Dnajc25 | 2.65498E-08 | 0.7316364  | 0.097 | 0.045 | 0.00082445  | KO | Dnajc25 | 0.052 |
| Dio2    | 2.72412E-08 | 1.36026437 | 0.016 | 0.002 | 0.00084592  | KO | Dio2    | 0.014 |
| Ccdc28a | 2.88152E-08 | 0.8946442  | 0.039 | 0.011 | 0.000894797 | KO | Ccdc28a | 0.028 |
| Sel1l3  | 2.95055E-08 | 0.98914844 | 0.029 | 0.006 | 0.000916235 | KO | Sel1l3  | 0.023 |
| Xlr     | 3.00136E-08 | 1.88109167 | 0.024 | 0.004 | 0.000932013 | KO | Xlr     | 0.02  |
| Gstp3   | 3.02748E-08 | 2.0431997  | 0.033 | 0.008 | 0.000940123 | KO | Gstp3   | 0.025 |
| Pdk2    | 3.16366E-08 | 1.22788235 | 0.024 | 0.004 | 0.00098241  | KO | Pdk2    | 0.02  |
| Zap70   | 3.17586E-08 | 1.47354486 | 0.024 | 0.004 | 0.0009862   | KO | Zap70   | 0.02  |
| Gprc5b  | 3.24262E-08 | 1.14605105 | 0.033 | 0.008 | 0.001006932 | KO | Gprc5b  | 0.025 |
| Perp    | 3.25422E-08 | 0.78582977 | 0.024 | 0.004 | 0.001010533 | KO | Perp    | 0.02  |
| Rab33b  | 3.43607E-08 | 0.75369437 | 0.055 | 0.019 | 0.001067002 | KO | Rab33b  | 0.036 |
| Spink2  | 3.88314E-08 | 1.13366837 | 0.015 | 0.001 | 0.00120583  | KO | Spink2  | 0.014 |
| Prm1    | 3.94131E-08 | 1.09387528 | 0.015 | 0.001 | 0.001223895 | KO | Prm1    | 0.014 |
| Fut7    | 3.98549E-08 | 0.81752209 | 0.015 | 0.001 | 0.001237616 | KO | Fut7    | 0.014 |
| Snn     | 4.07255E-08 | 2.11608785 | 0.021 | 0.003 | 0.001264648 | KO | Snn     | 0.018 |
| Kcnj2   | 4.23648E-08 | 0.979081   | 0.025 | 0.005 | 0.001315555 | KO | Kcnj2   | 0.02  |
| Fgfr3   | 4.7194E-08  | 2.09337949 | 0.011 | 0     | 0.001465516 | KO | Fgfr3   | 0.011 |
| Wdr95   | 4.75328E-08 | 2.22626797 | 0.011 | 0     | 0.001476035 | KO | Wdr95   | 0.011 |
| Fgfr2   | 4.77599E-08 | 1.19871991 | 0.011 | 0     | 0.001483088 | KO | Fgfr2   | 0.011 |
| Osbpl1a | 4.78159E-08 | 0.98574419 | 0.085 | 0.037 | 0.001484827 | KO | Osbpl1a | 0.048 |
| Myb     | 4.87598E-08 | 1.82009347 | 0.013 | 0.001 | 0.001514137 | KO | Myb     | 0.012 |

|             |             |            |       |       |             |    |            |       |
|-------------|-------------|------------|-------|-------|-------------|----|------------|-------|
| Gm45902     | 4.93234E-08 | 0.72106096 | 0.055 | 0.019 | 0.001531639 | KO | Gm45902    | 0.036 |
| Ttbk2       | 4.99797E-08 | 0.94854694 | 0.027 | 0.005 | 0.001552021 | KO | Ttbk2      | 0.022 |
| Fcrla       | 5.09323E-08 | 1.14840135 | 0.013 | 0.001 | 0.001581602 | KO | Fcrla      | 0.012 |
| Tnfsf18     | 5.09323E-08 | 0.98519891 | 0.013 | 0.001 | 0.001581602 | KO | Tnfsf18    | 0.012 |
| A930033H14F | 5.10333E-08 | 1.3234783  | 0.013 | 0.001 | 0.001584736 | KO | A930033H14 | 0.012 |
| Lrp4        | 5.11549E-08 | 0.88757467 | 0.027 | 0.005 | 0.001588513 | KO | Lrp4       | 0.022 |
| Panx1       | 5.39264E-08 | 0.9094834  | 0.064 | 0.025 | 0.001674577 | KO | Panx1      | 0.039 |
| Aldh1a2     | 5.57113E-08 | 1.57658102 | 0.012 | 0.001 | 0.001730003 | KO | Aldh1a2    | 0.011 |
| Skint3      | 5.59509E-08 | 1.83060632 | 0.012 | 0.001 | 0.001737445 | KO | Skint3     | 0.011 |
| Mill2       | 5.61916E-08 | 1.0665939  | 0.012 | 0.001 | 0.001744917 | KO | Mill2      | 0.011 |
| Stx1b       | 5.63123E-08 | 0.80545473 | 0.012 | 0.001 | 0.001748665 | KO | Stx1b      | 0.011 |
| Ccdc112     | 5.78424E-08 | 1.15175077 | 0.036 | 0.01  | 0.00179618  | KO | Ccdc112    | 0.026 |
| Skap1       | 6.05999E-08 | 1.29542183 | 0.023 | 0.004 | 0.001881809 | KO | Skap1      | 0.019 |
| P3h2        | 6.1233E-08  | 1.21742347 | 0.023 | 0.004 | 0.001901467 | KO | P3h2       | 0.019 |
| P2ry1       | 6.33349E-08 | 0.71840285 | 0.023 | 0.004 | 0.001966739 | KO | P2ry1      | 0.019 |
| Dnajb2      | 6.43468E-08 | 1.1534645  | 0.055 | 0.02  | 0.001998163 | KO | Dnajb2     | 0.035 |
| Tnfrsf4     | 6.75712E-08 | 0.82433595 | 0.032 | 0.008 | 0.002098289 | KO | Tnfrsf4    | 0.024 |
| Itpripl1    | 6.78652E-08 | 1.00611708 | 0.099 | 0.047 | 0.002107417 | KO | Itpripl1   | 0.052 |
| Il2ra       | 7.35106E-08 | 1.16262346 | 0.017 | 0.002 | 0.002282725 | KO | Il2ra      | 0.015 |
| Creb3l3     | 7.86542E-08 | 0.75797127 | 0.02  | 0.003 | 0.002442448 | KO | Creb3l3    | 0.017 |
| A230028O05F | 7.88764E-08 | 0.98302195 | 0.02  | 0.003 | 0.002449349 | KO | A230028O05 | 0.017 |
| Vasn        | 7.95468E-08 | 1.11199015 | 0.02  | 0.003 | 0.002470165 | KO | Vasn       | 0.017 |
| Cfap97      | 7.98268E-08 | 0.71685216 | 0.073 | 0.031 | 0.002478862 | KO | Cfap97     | 0.042 |
| Spint2      | 7.9884E-08  | 0.76097858 | 0.02  | 0.003 | 0.002480638 | KO | Spint2     | 0.017 |
| Katnal1     | 9.59266E-08 | 1.02842207 | 0.037 | 0.011 | 0.002978807 | KO | Katnal1    | 0.026 |
| Ceacam1     | 1.11348E-07 | 0.97062326 | 0.035 | 0.009 | 0.003457692 | KO | Ceacam1    | 0.026 |
| Elk1        | 1.17488E-07 | 0.78516858 | 0.052 | 0.018 | 0.003648345 | KO | Elk1       | 0.034 |
| Gm11696     | 1.20549E-07 | 1.07612281 | 0.021 | 0.004 | 0.003743417 | KO | Gm11696    | 0.017 |
| Gimap8      | 1.22399E-07 | 1.58740142 | 0.016 | 0.002 | 0.003800855 | KO | Gimap8     | 0.014 |
| Gm28707     | 1.22801E-07 | 1.35491191 | 0.016 | 0.002 | 0.003813325 | KO | Gm28707    | 0.014 |
| Prr15       | 1.23608E-07 | 1.35733464 | 0.016 | 0.002 | 0.003838384 | KO | Prr15      | 0.014 |
| Krt25       | 1.2381E-07  | 1.8605954  | 0.016 | 0.002 | 0.003844674 | KO | Krt25      | 0.014 |
| Gm48066     | 1.24699E-07 | 1.00826506 | 0.032 | 0.008 | 0.003872267 | KO | Gm48066    | 0.024 |
| D930016D06F | 1.32284E-07 | 1.02998157 | 0.029 | 0.007 | 0.00410781  | KO | D930016D06 | 0.022 |
| Nrde2       | 1.60038E-07 | 0.94655439 | 0.068 | 0.028 | 0.004969665 | KO | Nrde2      | 0.04  |
| Naip6       | 1.69145E-07 | 0.81103664 | 0.063 | 0.025 | 0.005252472 | KO | Naip6      | 0.038 |
| 1700025G04F | 1.70556E-07 | 0.79852449 | 0.083 | 0.037 | 0.00529626  | KO | 1700025G04 | 0.046 |
| Arap2       | 1.91223E-07 | 0.84224079 | 0.068 | 0.028 | 0.005938038 | KO | Arap2      | 0.04  |
| Milt1       | 1.92226E-07 | 0.77272024 | 0.059 | 0.023 | 0.005969185 | KO | Milt1      | 0.036 |
| Mical2      | 1.96962E-07 | 0.85280042 | 0.036 | 0.01  | 0.006116274 | KO | Mical2     | 0.026 |
| Tex14       | 1.98696E-07 | 1.24616787 | 0.015 | 0.002 | 0.006170101 | KO | Tex14      | 0.013 |
| Rprd1a      | 2.00491E-07 | 1.42160762 | 0.035 | 0.01  | 0.006225838 | KO | Rprd1a     | 0.025 |
| Abcb1a      | 2.02812E-07 | 0.74805124 | 0.015 | 0.002 | 0.006297917 | KO | Abcb1a     | 0.013 |
| Pias2       | 2.04537E-07 | 0.69478055 | 0.1   | 0.048 | 0.006351478 | KO | Pias2      | 0.052 |
| Htr2b       | 2.04862E-07 | 0.72432086 | 0.024 | 0.005 | 0.006361586 | KO | Htr2b      | 0.019 |
| Gm4117      | 2.27955E-07 | 1.21171336 | 0.025 | 0.005 | 0.007078692 | KO | Gm4117     | 0.02  |
| Fhl2        | 2.29763E-07 | 1.41725047 | 0.02  | 0.003 | 0.007134827 | KO | Fhl2       | 0.017 |
| Mansc1      | 2.36297E-07 | 0.71781201 | 0.02  | 0.003 | 0.007337729 | KO | Mansc1     | 0.017 |
| Chil1       | 2.60741E-07 | 1.52293785 | 0.017 | 0.002 | 0.008096804 | KO | Chil1      | 0.015 |
| Dusp14      | 2.99078E-07 | 1.29096144 | 0.013 | 0.001 | 0.009287279 | KO | Dusp14     | 0.012 |
| Ccr9        | 3.00158E-07 | 2.35118232 | 0.013 | 0.001 | 0.009320802 | KO | Ccr9       | 0.012 |
| Sik2        | 3.04515E-07 | 0.76881672 | 0.065 | 0.027 | 0.009456092 | KO | Sik2       | 0.038 |
| Gja1        | 3.09729E-07 | 1.20502738 | 0.056 | 0.022 | 0.009618013 | KO | Gja1       | 0.034 |
| Sbk1        | 3.20308E-07 | 0.84548195 | 0.021 | 0.004 | 0.009946511 | KO | Sbk1       | 0.017 |

|           |             |            |       |       |                |           |       |
|-----------|-------------|------------|-------|-------|----------------|-----------|-------|
| Zc3h11a   | 3.2801E-07  | 0.88250292 | 0.021 | 0.004 | 0.010185687 KO | Zc3h11a   | 0.017 |
| Rnd1      | 3.51441E-07 | 1.60025332 | 0.033 | 0.009 | 0.010913287 KO | Rnd1      | 0.024 |
| Ctla4     | 3.5964E-07  | 0.94689881 | 0.035 | 0.01  | 0.011167897 KO | Ctla4     | 0.025 |
| Sept10    | 3.67869E-07 | 0.85509958 | 0.049 | 0.018 | 0.011423446 KO | Sept10    | 0.031 |
| Per2      | 3.83498E-07 | 0.94138668 | 0.047 | 0.016 | 0.011908748 KO | Per2      | 0.031 |
| Mypop     | 4.13839E-07 | 1.04884569 | 0.012 | 0.001 | 0.012850937 KO | Mypop     | 0.011 |
| Osbpl3    | 4.24136E-07 | 0.74411607 | 0.068 | 0.029 | 0.013170681 KO | Osbpl3    | 0.039 |
| Nsun4     | 4.35927E-07 | 0.89473724 | 0.045 | 0.016 | 0.01353685 KO  | Nsun4     | 0.029 |
| Prkci     | 4.39517E-07 | 0.72495404 | 0.061 | 0.025 | 0.013648315 KO | Prkci     | 0.036 |
| Fam189b   | 4.45238E-07 | 1.44152599 | 0.031 | 0.008 | 0.013825989 KO | Fam189b   | 0.023 |
| Atpaf2    | 4.568E-07   | 0.88679423 | 0.092 | 0.045 | 0.014185013 KO | Atpaf2    | 0.047 |
| Map2k3os  | 4.65014E-07 | 1.17961411 | 0.016 | 0.002 | 0.014440087 KO | Map2k3os  | 0.014 |
| Atp1b1    | 4.88519E-07 | 1.39851331 | 0.011 | 0.001 | 0.015169973 KO | Atp1b1    | 0.01  |
| Dlx3      | 4.89543E-07 | 1.98786087 | 0.011 | 0.001 | 0.015201777 KO | Dlx3      | 0.01  |
| Slc52a3   | 4.9366E-07  | 0.8953542  | 0.011 | 0.001 | 0.015329638 KO | Slc52a3   | 0.01  |
| Etfbkmt   | 5.10706E-07 | 1.22107535 | 0.029 | 0.008 | 0.015858939 KO | Etfbkmt   | 0.021 |
| Afg1l     | 5.24403E-07 | 1.24705309 | 0.028 | 0.007 | 0.016284275 KO | Afg1l     | 0.021 |
| Fam78b    | 5.27338E-07 | 0.81672016 | 0.041 | 0.014 | 0.016375423 KO | Fam78b    | 0.027 |
| Gm9530    | 6.13084E-07 | 0.88174771 | 0.02  | 0.004 | 0.019038086 KO | Gm9530    | 0.016 |
| Prkcq     | 6.19328E-07 | 1.21738249 | 0.02  | 0.004 | 0.019231991 KO | Prkcq     | 0.016 |
| Rap1gap2  | 6.44393E-07 | 1.07642788 | 0.051 | 0.019 | 0.020010347 KO | Rap1gap2  | 0.032 |
| Acap1     | 6.54727E-07 | 1.3263039  | 0.039 | 0.012 | 0.020331252 KO | Acap1     | 0.027 |
| Hsd17b7   | 7.42811E-07 | 1.05460986 | 0.033 | 0.01  | 0.023066503 KO | Hsd17b7   | 0.023 |
| Klrd1     | 7.64637E-07 | 1.89668233 | 0.031 | 0.008 | 0.023744278 KO | Klrd1     | 0.023 |
| Pde8b     | 7.70407E-07 | 1.14146526 | 0.033 | 0.01  | 0.023923455 KO | Pde8b     | 0.023 |
| Ikzf5     | 7.71192E-07 | 0.97486088 | 0.08  | 0.037 | 0.023947834 KO | Ikzf5     | 0.043 |
| Plscr4    | 7.88034E-07 | 0.81680618 | 0.021 | 0.004 | 0.024470816 KO | Plscr4    | 0.017 |
| Zc3h4     | 7.93106E-07 | 0.90354434 | 0.091 | 0.044 | 0.024628325 KO | Zc3h4     | 0.047 |
| Trim29    | 8.10547E-07 | 2.18619072 | 0.017 | 0.003 | 0.025169922 KO | Trim29    | 0.014 |
| Gm49339   | 8.11934E-07 | 1.58446337 | 0.015 | 0.002 | 0.025212999 KO | Gm49339   | 0.013 |
| Ptprf     | 8.13217E-07 | 2.1570087  | 0.015 | 0.002 | 0.025252826 KO | Ptprf     | 0.013 |
| Xcl1      | 8.2615E-07  | 1.25155433 | 0.015 | 0.002 | 0.025654443 KO | Xcl1      | 0.013 |
| Lifr      | 8.65343E-07 | 0.90636865 | 0.108 | 0.058 | 0.0268715 KO   | Lifr      | 0.05  |
| Clec1b    | 8.8676E-07  | 0.71459472 | 0.031 | 0.008 | 0.027536568 KO | Clec1b    | 0.023 |
| Aasdh     | 9.07195E-07 | 1.43468572 | 0.028 | 0.007 | 0.028171138 KO | Aasdh     | 0.021 |
| Jag2      | 9.10007E-07 | 1.22760415 | 0.023 | 0.005 | 0.028258439 KO | Jag2      | 0.018 |
| Acad12    | 9.17235E-07 | 0.88716909 | 0.023 | 0.005 | 0.028482886 KO | Acad12    | 0.018 |
| Cd27      | 9.28705E-07 | 0.81782045 | 0.023 | 0.005 | 0.028839061 KO | Cd27      | 0.018 |
| Shb       | 9.50738E-07 | 0.82403683 | 0.036 | 0.011 | 0.029523265 KO | Shb       | 0.025 |
| Cd101     | 9.75714E-07 | 0.8495132  | 0.024 | 0.005 | 0.030298832 KO | Cd101     | 0.019 |
| Thns1     | 1.02427E-06 | 0.85336067 | 0.027 | 0.007 | 0.031806647 KO | Thns1     | 0.02  |
| Ccdc88c   | 1.17244E-06 | 0.96516917 | 0.047 | 0.017 | 0.036407913 KO | Ccdc88c   | 0.03  |
| Ptpn4     | 1.26383E-06 | 1.54466484 | 0.04  | 0.014 | 0.039245615 KO | Ptpn4     | 0.026 |
| Hoxb4     | 1.40195E-06 | 0.697901   | 0.032 | 0.009 | 0.04353489 KO  | Hoxb4     | 0.023 |
| Ptch1     | 1.49779E-06 | 1.00606608 | 0.031 | 0.009 | 0.046510725 KO | Ptch1     | 0.022 |
| Tcf7      | 1.56715E-06 | 0.87681724 | 0.016 | 0.002 | 0.04866485 KO  | Tcf7      | 0.014 |
| Egfr      | 1.57161E-06 | 1.18498305 | 0.016 | 0.002 | 0.048803254 KO | Egfr      | 0.014 |
| Gimap5    | 1.57968E-06 | 1.77558094 | 0.029 | 0.008 | 0.049053752 KO | Gimap5    | 0.021 |
| Gjb2      | 1.63524E-06 | 1.44376624 | 0.029 | 0.008 | 0.050778955 KO | Gjb2      | 0.021 |
| Serpinb1a | 1.65617E-06 | 2.87186702 | 0.029 | 0.008 | 0.051429139 KO | Serpinb1a | 0.021 |
| Snx33     | 1.75204E-06 | 1.09768203 | 0.029 | 0.008 | 0.054405964 KO | Snx33     | 0.021 |
| Arhgap23  | 1.79494E-06 | 0.8044971  | 0.064 | 0.028 | 0.055738157 KO | Arhgap23  | 0.036 |
| Fmo5      | 1.83802E-06 | 0.72086202 | 0.021 | 0.005 | 0.05707589 KO  | Fmo5      | 0.016 |
| Itga1     | 1.85028E-06 | 0.76292199 | 0.047 | 0.017 | 0.057456632 KO | Itga1     | 0.03  |

|             |             |            |       |       |                |            |       |
|-------------|-------------|------------|-------|-------|----------------|------------|-------|
| Phc1        | 1.86618E-06 | 0.69894548 | 0.039 | 0.013 | 0.057950461 KO | Phc1       | 0.026 |
| Kif19a      | 1.88657E-06 | 1.73152306 | 0.024 | 0.006 | 0.058583739 KO | Kif19a     | 0.018 |
| Hpgd        | 1.89443E-06 | 1.98964007 | 0.024 | 0.006 | 0.058827634 KO | Hpgd       | 0.018 |
| Acsf2       | 1.91091E-06 | 1.02821057 | 0.049 | 0.019 | 0.059339414 KO | Acsf2      | 0.03  |
| Fhl3        | 1.99202E-06 | 0.8146189  | 0.048 | 0.018 | 0.061858335 KO | Fhl3       | 0.03  |
| Nipsnap1    | 2.10361E-06 | 0.72301164 | 0.025 | 0.006 | 0.065323496 KO | Nipsnap1   | 0.019 |
| Plcg1       | 2.16093E-06 | 0.98430036 | 0.043 | 0.015 | 0.067103375 KO | Plcg1      | 0.028 |
| Ovca2       | 2.19237E-06 | 1.92811222 | 0.012 | 0.001 | 0.068079614 KO | Ovca2      | 0.011 |
| Mfsd4b3     | 2.21533E-06 | 1.03498658 | 0.012 | 0.001 | 0.068792655 KO | Mfsd4b3    | 0.011 |
| Ptpn13      | 2.23077E-06 | 0.79860744 | 0.012 | 0.001 | 0.069271994 KO | Ptpn13     | 0.011 |
| Galnt9      | 2.24241E-06 | 0.81313495 | 0.012 | 0.001 | 0.069633602 KO | Galnt9     | 0.011 |
| S100a14     | 2.25021E-06 | 0.75864601 | 0.012 | 0.001 | 0.069875679 KO | S100a14    | 0.011 |
| Slc14a1     | 2.31916E-06 | 1.21761149 | 0.017 | 0.003 | 0.072016731 KO | Slc14a1    | 0.014 |
| Ryk         | 2.39811E-06 | 0.85669297 | 0.032 | 0.01  | 0.074468511 KO | Ryk        | 0.022 |
| Crim1       | 2.85793E-06 | 1.10250709 | 0.048 | 0.019 | 0.088747258 KO | Crim1      | 0.029 |
| Gata3       | 2.86092E-06 | 1.67761561 | 0.015 | 0.002 | 0.088840093 KO | Gata3      | 0.013 |
| Fxyd3       | 2.88611E-06 | 1.44747594 | 0.015 | 0.002 | 0.089622315 KO | Fxyd3      | 0.013 |
| Zfp619      | 2.92898E-06 | 1.80153746 | 0.019 | 0.004 | 0.090953688 KO | Zfp619     | 0.015 |
| Ust         | 3.06356E-06 | 0.79080824 | 0.029 | 0.008 | 0.095132746 KO | Ust        | 0.021 |
| Bco2        | 3.07108E-06 | 1.0941286  | 0.019 | 0.004 | 0.095366343 KO | Bco2       | 0.015 |
| Mycl        | 3.26396E-06 | 0.87264298 | 0.011 | 0.001 | 0.101355786 KO | Mycl       | 0.01  |
| Siglecg     | 3.27003E-06 | 1.62005205 | 0.011 | 0.001 | 0.101544243 KO | Siglecg    | 0.01  |
| Sult2b1     | 3.27611E-06 | 1.43902836 | 0.011 | 0.001 | 0.101733037 KO | Sult2b1    | 0.01  |
| lfng        | 3.27611E-06 | 1.15193682 | 0.011 | 0.001 | 0.101733037 KO | lfng       | 0.01  |
| Polg2       | 3.45584E-06 | 1.14668582 | 0.04  | 0.014 | 0.107314235 KO | Polg2      | 0.026 |
| Xlr4a       | 3.68105E-06 | 0.74406648 | 0.02  | 0.004 | 0.114307761 KO | Xlr4a      | 0.016 |
| Trem14      | 3.73955E-06 | 1.3705287  | 0.021 | 0.005 | 0.116124377 KO | Trem14     | 0.016 |
| Dmwd        | 3.86519E-06 | 0.85904773 | 0.025 | 0.007 | 0.120025619 KO | Dmwd       | 0.018 |
| Gstt3       | 3.97152E-06 | 1.31791743 | 0.024 | 0.006 | 0.123327613 KO | Gstt3      | 0.018 |
| Cracr2a     | 4.01627E-06 | 0.90603518 | 0.023 | 0.005 | 0.12471734 KO  | Cracr2a    | 0.018 |
| Lck         | 4.07491E-06 | 1.12496556 | 0.023 | 0.005 | 0.126538223 KO | Lck        | 0.018 |
| Rfx5        | 4.45978E-06 | 0.92572105 | 0.045 | 0.017 | 0.13848962 KO  | Rfx5       | 0.028 |
| Zfp959      | 5.7579E-06  | 0.80561257 | 0.028 | 0.008 | 0.178799917 KO | Zfp959     | 0.02  |
| Pdcd1       | 5.99979E-06 | 1.33544814 | 0.017 | 0.003 | 0.186311608 KO | Pdcd1      | 0.014 |
| Gm3435      | 6.1943E-06  | 0.78970559 | 0.017 | 0.003 | 0.192351623 KO | Gm3435     | 0.014 |
| Mfsd4b4     | 6.6403E-06  | 0.98230729 | 0.032 | 0.01  | 0.206201143 KO | Mfsd4b4    | 0.022 |
| Rbm12b2     | 6.68766E-06 | 0.82130318 | 0.032 | 0.01  | 0.207671754 KO | Rbm12b2    | 0.022 |
| Tyr         | 6.82475E-06 | 1.2645041  | 0.035 | 0.012 | 0.211929052 KO | Tyr        | 0.023 |
| A130077B15F | 7.18489E-06 | 1.01454217 | 0.019 | 0.004 | 0.223112456 KO | A130077B15 | 0.015 |
| Pim2        | 7.18606E-06 | 2.24772196 | 0.024 | 0.006 | 0.223148767 KO | Pim2       | 0.018 |
| Lrrc49      | 7.38115E-06 | 0.87962342 | 0.031 | 0.01  | 0.229206894 KO | Lrrc49     | 0.021 |
| Tnfsf10     | 7.80917E-06 | 1.23877732 | 0.024 | 0.006 | 0.242498035 KO | Tnfsf10    | 0.018 |
| 2510002D24F | 8.33177E-06 | 1.19730372 | 0.044 | 0.017 | 0.258726539 KO | 2510002D24 | 0.027 |
| Agrrn       | 8.47678E-06 | 0.91736091 | 0.029 | 0.009 | 0.263229319 KO | Agrrn      | 0.02  |
| Acta1       | 9.24378E-06 | 2.42906668 | 0.012 | 0.002 | 0.28704723 KO  | Acta1      | 0.01  |
| Lef1        | 9.25836E-06 | 2.10273804 | 0.012 | 0.002 | 0.287499863 KO | Lef1       | 0.01  |
| Ceacam19    | 9.27296E-06 | 1.74274605 | 0.012 | 0.002 | 0.287953179 KO | Ceacam19   | 0.01  |
| Gm4631      | 9.28758E-06 | 1.40433502 | 0.012 | 0.002 | 0.288407178 KO | Gm4631     | 0.01  |
| 2610035D17F | 9.33157E-06 | 0.86423006 | 0.012 | 0.002 | 0.28977328 KO  | 2610035D17 | 0.01  |
| Tmtc2       | 9.39054E-06 | 0.71454833 | 0.012 | 0.002 | 0.291604369 KO | Tmtc2      | 0.01  |
| Cdc42bpg    | 1.13425E-05 | 1.11691416 | 0.027 | 0.008 | 0.352218701 KO | Cdc42bpg   | 0.019 |
| Efnb1       | 1.20894E-05 | 1.44533781 | 0.016 | 0.003 | 0.375410924 KO | Efnb1      | 0.013 |
| Pced1a      | 1.23218E-05 | 1.04184201 | 0.036 | 0.013 | 0.382629951 KO | Pced1a     | 0.023 |
| Xlr4b       | 1.44649E-05 | 0.86106103 | 0.029 | 0.009 | 0.449179128 KO | Xlr4b      | 0.02  |

|              |             |            |       |       |                |             |       |
|--------------|-------------|------------|-------|-------|----------------|-------------|-------|
| Timp1        | 1.49182E-05 | 0.90405948 | 0.142 | 0.087 | 0.463255911 KO | Timp1       | 0.055 |
| Krt75        | 1.57279E-05 | 1.75624609 | 0.011 | 0.001 | 0.488397057 KO | Krt75       | 0.01  |
| Aqp9         | 1.58064E-05 | 1.17894038 | 0.011 | 0.001 | 0.49083614 KO  | Aqp9        | 0.01  |
| Klra9        | 1.58327E-05 | 1.72148243 | 0.011 | 0.001 | 0.491651744 KO | Klra9       | 0.01  |
| Atg9b        | 1.5859E-05  | 1.48086869 | 0.011 | 0.001 | 0.492468641 KO | Atg9b       | 0.01  |
| Nlrp1a       | 1.59117E-05 | 1.17269935 | 0.011 | 0.001 | 0.494106317 KO | Nlrp1a      | 0.01  |
| 1700034H15F  | 1.63343E-05 | 1.01712428 | 0.02  | 0.005 | 0.507229967 KO | 1700034H15  | 0.015 |
| Trim68       | 1.69242E-05 | 1.44043781 | 0.013 | 0.002 | 0.525546106 KO | Trim68      | 0.011 |
| Cxcr6        | 1.69713E-05 | 0.95723247 | 0.013 | 0.002 | 0.527010501 KO | Cxcr6       | 0.011 |
| Slx1b        | 1.82881E-05 | 1.10493684 | 0.041 | 0.016 | 0.567900158 KO | Slx1b       | 0.025 |
| Krt5         | 1.98059E-05 | 0.81913729 | 0.027 | 0.008 | 0.615032809 KO | Krt5        | 0.019 |
| Cd3g         | 2.21018E-05 | 1.01121364 | 0.025 | 0.008 | 0.686326324 KO | Cd3g        | 0.017 |
| Gcnt2        | 2.23812E-05 | 0.98578522 | 0.073 | 0.037 | 0.695003053 KO | Gcnt2       | 0.036 |
| Ccl17        | 2.30494E-05 | 2.34012888 | 0.015 | 0.003 | 0.715753005 KO | Ccl17       | 0.012 |
| Rcn3         | 2.32546E-05 | 1.01980371 | 0.063 | 0.03  | 0.722125172 KO | Rcn3        | 0.033 |
| Il33         | 2.38492E-05 | 1.39470989 | 0.015 | 0.003 | 0.740590618 KO | Il33        | 0.012 |
| Ankrd13d     | 2.50744E-05 | 0.77389635 | 0.024 | 0.007 | 0.778635687 KO | Ankrd13d    | 0.017 |
| B4galt4      | 2.80237E-05 | 1.44398119 | 0.023 | 0.006 | 0.870219135 KO | B4galt4     | 0.017 |
| Grhl1        | 2.93973E-05 | 1.11136429 | 0.016 | 0.003 | 0.912875312 KO | Grhl1       | 0.013 |
| Tacstd2      | 2.96036E-05 | 0.74676838 | 0.016 | 0.003 | 0.919280941 KO | Tacstd2     | 0.013 |
| 1110019D14F  | 3.01207E-05 | 0.89480798 | 0.021 | 0.006 | 0.935338267 KO | 1110019D14  | 0.015 |
| Pdcd1lg2     | 3.13097E-05 | 0.92144869 | 0.021 | 0.006 | 0.972259171 KO | Pdcd1lg2    | 0.015 |
| Etl4         | 3.2042E-05  | 1.65667268 | 0.019 | 0.005 | 0.994999089 KO | Etl4        | 0.014 |
| Ccp1g1os     | 3.21499E-05 | 0.77423617 | 0.02  | 0.005 | 0.99835095 KO  | Ccp1g1os    | 0.015 |
| Plat         | 3.25428E-05 | 1.45419072 | 0.019 | 0.005 | 1 KO           | Plat        | 0.014 |
| Fzd1         | 3.30852E-05 | 1.19329286 | 0.019 | 0.005 | 1 KO           | Fzd1        | 0.014 |
| 6720427I07Ri | 3.46884E-05 | 0.69806421 | 0.041 | 0.017 | 1 KO           | 6720427I07F | 0.024 |
| Dennd6b      | 3.78589E-05 | 0.93285635 | 0.025 | 0.008 | 1 KO           | Dennd6b     | 0.017 |
| Prdm10       | 4.45298E-05 | 0.96685431 | 0.031 | 0.011 | 1 KO           | Prdm10      | 0.02  |
| Emp2         | 4.65227E-05 | 1.87480258 | 0.013 | 0.002 | 1 KO           | Emp2        | 0.011 |
| Fgfr1        | 4.71855E-05 | 1.22756946 | 0.013 | 0.002 | 1 KO           | Fgfr1       | 0.011 |
| Prickle3     | 4.7487E-05  | 0.86149823 | 0.033 | 0.012 | 1 KO           | Prickle3    | 0.021 |
| Flt3         | 4.74897E-05 | 0.79767437 | 0.013 | 0.002 | 1 KO           | Flt3        | 0.011 |
| Gm32089      | 4.78573E-05 | 1.04930896 | 0.013 | 0.002 | 1 KO           | Gm32089     | 0.011 |
| Plcl1        | 4.89182E-05 | 1.23405259 | 0.023 | 0.007 | 1 KO           | Plcl1       | 0.016 |
| Lrsam1       | 5.03778E-05 | 0.80601645 | 0.037 | 0.015 | 1 KO           | Lrsam1      | 0.022 |
| Gapt         | 5.19945E-05 | 0.96816696 | 0.035 | 0.013 | 1 KO           | Gapt        | 0.022 |
| Usp2         | 5.32833E-05 | 0.71573743 | 0.052 | 0.024 | 1 KO           | Usp2        | 0.028 |
| Ccdc137      | 5.36176E-05 | 0.81120008 | 0.029 | 0.01  | 1 KO           | Ccdc137     | 0.019 |
| Rgs18        | 5.48047E-05 | 0.7161175  | 0.052 | 0.024 | 1 KO           | Rgs18       | 0.028 |
| Gcc1         | 5.59304E-05 | 0.79194958 | 0.052 | 0.024 | 1 KO           | Gcc1        | 0.028 |
| Yap1         | 5.65135E-05 | 0.81851317 | 0.021 | 0.006 | 1 KO           | Yap1        | 0.015 |
| Col16a1      | 5.74352E-05 | 1.45016464 | 0.015 | 0.003 | 1 KO           | Col16a1     | 0.012 |
| Tbc1d10c     | 5.79694E-05 | 0.75372272 | 0.029 | 0.01  | 1 KO           | Tbc1d10c    | 0.019 |
| Stox2        | 5.84331E-05 | 1.02065315 | 0.029 | 0.01  | 1 KO           | Stox2       | 0.019 |
| Bbs2         | 5.85969E-05 | 1.06578706 | 0.015 | 0.003 | 1 KO           | Bbs2        | 0.012 |
| Slc27a3      | 5.9017E-05  | 1.36707463 | 0.011 | 0.002 | 1 KO           | Slc27a3     | 0.009 |
| Fosl1        | 5.99946E-05 | 0.77723402 | 0.011 | 0.002 | 1 KO           | Fosl1       | 0.009 |
| Cacna1f      | 6.05306E-05 | 0.83917423 | 0.036 | 0.014 | 1 KO           | Cacna1f     | 0.022 |
| Gm13012      | 6.11683E-05 | 0.93889474 | 0.02  | 0.005 | 1 KO           | Gm13012     | 0.015 |
| Tex9         | 6.12966E-05 | 0.71278138 | 0.025 | 0.008 | 1 KO           | Tex9        | 0.017 |
| Slc40a1      | 6.35681E-05 | 2.177504   | 0.039 | 0.016 | 1 KO           | Slc40a1     | 0.023 |
| Znrf3        | 6.46792E-05 | 1.54051924 | 0.019 | 0.005 | 1 KO           | Znrf3       | 0.014 |
| Zrsr1        | 6.55089E-05 | 0.89333707 | 0.019 | 0.005 | 1 KO           | Zrsr1       | 0.014 |

|             |             |            |       |       |      |             |       |
|-------------|-------------|------------|-------|-------|------|-------------|-------|
| Cd6         | 6.56769E-05 | 1.43812575 | 0.017 | 0.004 | 1 KO | Cd6         | 0.013 |
| Myom1       | 6.64956E-05 | 1.37322146 | 0.017 | 0.004 | 1 KO | Myom1       | 0.013 |
| Znrd1as     | 6.68826E-05 | 1.01828786 | 0.031 | 0.011 | 1 KO | Znrd1as     | 0.02  |
| Rwdd2b      | 6.74652E-05 | 1.21756201 | 0.028 | 0.01  | 1 KO | Rwdd2b      | 0.018 |
| 9130011E15R | 8.41826E-05 | 1.3525999  | 0.023 | 0.007 | 1 KO | 9130011E15  | 0.016 |
| Stab2       | 9.29413E-05 | 0.74112606 | 0.012 | 0.002 | 1 KO | Stab2       | 0.01  |
| Acad10      | 9.80214E-05 | 0.7546465  | 0.021 | 0.006 | 1 KO | Acad10      | 0.015 |
| F5          | 0.000113765 | 1.45141629 | 0.013 | 0.003 | 1 KO | F5          | 0.01  |
| Eml6        | 0.000116233 | 0.86665319 | 0.013 | 0.003 | 1 KO | Eml6        | 0.01  |
| Ak8         | 0.000116511 | 0.77546674 | 0.013 | 0.003 | 1 KO | Ak8         | 0.01  |
| Coro2b      | 0.00011968  | 0.81290057 | 0.019 | 0.005 | 1 KO | Coro2b      | 0.014 |
| Ppp1r16b    | 0.000127246 | 1.26367909 | 0.017 | 0.005 | 1 KO | Ppp1r16b    | 0.012 |
| Dclk2       | 0.000128999 | 0.90244598 | 0.017 | 0.005 | 1 KO | Dclk2       | 0.012 |
| Zfyve28     | 0.000129434 | 0.96689342 | 0.015 | 0.003 | 1 KO | Zfyve28     | 0.012 |
| Dsp         | 0.000129576 | 1.07929905 | 0.015 | 0.003 | 1 KO | Dsp         | 0.012 |
| C1s1        | 0.000129576 | 1.01350071 | 0.015 | 0.003 | 1 KO | C1s1        | 0.012 |
| Fads6       | 0.000131701 | 0.85652483 | 0.016 | 0.004 | 1 KO | Fads6       | 0.012 |
| 5031425F14R | 0.000132656 | 1.19425398 | 0.016 | 0.004 | 1 KO | 5031425F14R | 0.012 |
| Usp11       | 0.000133617 | 0.79610922 | 0.016 | 0.004 | 1 KO | Usp11       | 0.012 |
| Bend3       | 0.000136541 | 0.80254421 | 0.016 | 0.004 | 1 KO | Bend3       | 0.012 |
| Nsun6       | 0.000136842 | 0.74302258 | 0.064 | 0.033 | 1 KO | Nsun6       | 0.031 |
| BC035044    | 0.000172486 | 1.30704076 | 0.024 | 0.008 | 1 KO | BC035044    | 0.016 |
| Lyve1       | 0.000173148 | 1.56266586 | 0.031 | 0.012 | 1 KO | Lyve1       | 0.019 |
| Fasl        | 0.000182149 | 1.07951775 | 0.011 | 0.002 | 1 KO | Fasl        | 0.009 |
| Zkscan7     | 0.000182889 | 0.7682963  | 0.011 | 0.002 | 1 KO | Zkscan7     | 0.009 |
| Dcun1d4     | 0.000183806 | 0.78153424 | 0.029 | 0.011 | 1 KO | Dcun1d4     | 0.018 |
| A530064D06F | 0.000201508 | 0.80795435 | 0.031 | 0.012 | 1 KO | A530064D06F | 0.019 |
| Rbm12b1     | 0.000214538 | 1.15003502 | 0.019 | 0.005 | 1 KO | Rbm12b1     | 0.014 |
| Gm10521     | 0.000233324 | 1.21594951 | 0.012 | 0.002 | 1 KO | Gm10521     | 0.01  |
| Adgb        | 0.000235022 | 1.19235711 | 0.012 | 0.002 | 1 KO | Adgb        | 0.01  |
| Osbpl5      | 0.000235306 | 1.30245889 | 0.012 | 0.002 | 1 KO | Osbpl5      | 0.01  |
| Cd8a        | 0.000238478 | 1.31227085 | 0.017 | 0.005 | 1 KO | Cd8a        | 0.012 |
| Btbd3       | 0.00023855  | 0.72442355 | 0.025 | 0.009 | 1 KO | Btbd3       | 0.016 |
| Slco4a1     | 0.000239317 | 0.98243444 | 0.012 | 0.002 | 1 KO | Slco4a1     | 0.01  |
| Akr1c12     | 0.000241461 | 0.73040559 | 0.025 | 0.009 | 1 KO | Akr1c12     | 0.016 |
| Chst7       | 0.000264494 | 0.73051009 | 0.013 | 0.003 | 1 KO | Chst7       | 0.01  |
| Bbs10       | 0.000266844 | 1.07720886 | 0.013 | 0.003 | 1 KO | Bbs10       | 0.01  |
| Dynlt1b     | 0.000268917 | 0.86833422 | 0.013 | 0.003 | 1 KO | Dynlt1b     | 0.01  |
| Rbm41       | 0.00027102  | 0.70294032 | 0.021 | 0.007 | 1 KO | Rbm41       | 0.014 |
| Plxnb1      | 0.000272168 | 1.04411395 | 0.015 | 0.004 | 1 KO | Plxnb1      | 0.011 |
| Nol9        | 0.000272229 | 1.02875383 | 0.043 | 0.02  | 1 KO | Nol9        | 0.023 |
| Utp14b      | 0.00027441  | 1.1262117  | 0.027 | 0.01  | 1 KO | Utp14b      | 0.017 |
| Fcna        | 0.000306204 | 1.6247841  | 0.079 | 0.046 | 1 KO | Fcna        | 0.033 |
| Usp35       | 0.000312562 | 0.89053354 | 0.02  | 0.006 | 1 KO | Usp35       | 0.014 |
| 0610040B10R | 0.00031617  | 1.4014635  | 0.028 | 0.011 | 1 KO | 0610040B10R | 0.017 |
| Mirt1       | 0.000322675 | 0.72536821 | 0.02  | 0.006 | 1 KO | Mirt1       | 0.014 |
| Tmod1       | 0.00034453  | 0.97537747 | 0.023 | 0.008 | 1 KO | Tmod1       | 0.015 |
| Cebpd       | 0.0003597   | 0.800667   | 0.142 | 0.095 | 1 KO | Cebpd       | 0.047 |
| Prdm15      | 0.000375474 | 0.77805132 | 0.025 | 0.009 | 1 KO | Prdm15      | 0.016 |
| Mamld1      | 0.000428061 | 1.07313918 | 0.017 | 0.005 | 1 KO | Mamld1      | 0.012 |
| Ms4a4b      | 0.000430869 | 1.14782104 | 0.04  | 0.019 | 1 KO | Ms4a4b      | 0.021 |
| Echdc3      | 0.000431073 | 0.71632771 | 0.017 | 0.005 | 1 KO | Echdc3      | 0.012 |
| Zfp947      | 0.000471092 | 0.84598582 | 0.016 | 0.005 | 1 KO | Zfp947      | 0.011 |
| Bcl11b      | 0.000480102 | 1.18283349 | 0.011 | 0.002 | 1 KO | Bcl11b      | 0.009 |

|              |             |            |       |       |      |             |       |
|--------------|-------------|------------|-------|-------|------|-------------|-------|
| 3110001I22Ri | 0.000515252 | 0.87449136 | 0.02  | 0.007 | 1 KO | 3110001I22F | 0.013 |
| Lat          | 0.000520504 | 1.02848842 | 0.02  | 0.007 | 1 KO | Lat         | 0.013 |
| Fam187b      | 0.00052553  | 0.77530206 | 0.015 | 0.004 | 1 KO | Fam187b     | 0.011 |
| Jakmip1      | 0.000542321 | 1.16313617 | 0.012 | 0.003 | 1 KO | Jakmip1     | 0.009 |
| Lama5        | 0.000545706 | 1.01785516 | 0.013 | 0.003 | 1 KO | Lama5       | 0.01  |
| Sept1        | 0.000554325 | 0.69853861 | 0.039 | 0.018 | 1 KO | Sept1       | 0.021 |
| Gtf2e1       | 0.000577445 | 0.71545956 | 0.049 | 0.025 | 1 KO | Gtf2e1      | 0.024 |
| 9930104L06R  | 0.000640709 | 1.09668232 | 0.024 | 0.009 | 1 KO | 9930104L06I | 0.015 |
| Tchh         | 0.000729638 | 1.00235416 | 0.017 | 0.005 | 1 KO | Tchh        | 0.012 |
| Acrbp        | 0.000812634 | 1.00884952 | 0.027 | 0.011 | 1 KO | Acrbp       | 0.016 |
| Pla1a        | 0.000845243 | 0.93389807 | 0.016 | 0.005 | 1 KO | Pla1a       | 0.011 |
| Zbtb40       | 0.000938427 | 0.76615595 | 0.024 | 0.009 | 1 KO | Zbtb40      | 0.015 |
| Etv1         | 0.000965652 | 0.82750535 | 0.069 | 0.041 | 1 KO | Etv1        | 0.028 |
| Tspan10      | 0.001021046 | 0.74688989 | 0.021 | 0.008 | 1 KO | Tspan10     | 0.013 |
| Kit          | 0.001090742 | 1.02993057 | 0.011 | 0.002 | 1 KO | Kit         | 0.009 |
| Nppb         | 0.001093192 | 1.45741588 | 0.011 | 0.002 | 1 KO | Nppb        | 0.009 |
| Adgr1        | 0.001094418 | 1.72347597 | 0.011 | 0.002 | 1 KO | Adgr1       | 0.009 |
| Hoxb3        | 0.001108132 | 1.08806441 | 0.012 | 0.003 | 1 KO | Hoxb3       | 0.009 |
| Gm43936      | 0.001109239 | 0.91880485 | 0.011 | 0.002 | 1 KO | Gm43936     | 0.009 |
| Mrm1         | 0.00114161  | 1.01531627 | 0.032 | 0.014 | 1 KO | Mrm1        | 0.018 |
| Adamts10     | 0.001177838 | 0.85527055 | 0.059 | 0.033 | 1 KO | Adamts10    | 0.026 |
| Cd8b1        | 0.001364663 | 1.53574902 | 0.016 | 0.005 | 1 KO | Cd8b1       | 0.011 |
| Cx3cr1       | 0.001425877 | 0.71142733 | 0.109 | 0.073 | 1 KO | Cx3cr1      | 0.036 |
| Cd3e         | 0.001455225 | 0.96374003 | 0.019 | 0.007 | 1 KO | Cd3e        | 0.012 |
| Tmc4         | 0.001519455 | 0.93725058 | 0.019 | 0.007 | 1 KO | Tmc4        | 0.012 |
| Ltc4s        | 0.001671391 | 1.01376361 | 0.052 | 0.029 | 1 KO | Ltc4s       | 0.023 |
| Ptpn21       | 0.00167733  | 1.0586564  | 0.023 | 0.009 | 1 KO | Ptpn21      | 0.014 |
| Klhl42       | 0.001704172 | 0.81645365 | 0.023 | 0.009 | 1 KO | Klhl42      | 0.014 |
| Prpf40b      | 0.001908354 | 0.70178779 | 0.017 | 0.006 | 1 KO | Prpf40b     | 0.011 |
| Suox         | 0.001910108 | 1.26203129 | 0.013 | 0.004 | 1 KO | Suox        | 0.009 |
| Kctd12b      | 0.001918102 | 0.73850563 | 0.036 | 0.018 | 1 KO | Kctd12b     | 0.018 |
| Dgkg         | 0.00212307  | 1.02663846 | 0.012 | 0.003 | 1 KO | Dgkg        | 0.009 |
| Zc3hav1l     | 0.002127117 | 0.71252556 | 0.012 | 0.003 | 1 KO | Zc3hav1l    | 0.009 |
| Cacnb1       | 0.00214542  | 0.70997201 | 0.012 | 0.003 | 1 KO | Cacnb1      | 0.009 |
| Ahrr         | 0.002262189 | 0.98905594 | 0.011 | 0.003 | 1 KO | Ahrr        | 0.008 |
| Lins1        | 0.002271198 | 0.83943334 | 0.016 | 0.005 | 1 KO | Lins1       | 0.011 |
| Krtcap3      | 0.002271501 | 0.71702742 | 0.011 | 0.003 | 1 KO | Krtcap3     | 0.008 |
| Parp16       | 0.002290617 | 1.43115583 | 0.016 | 0.005 | 1 KO | Parp16      | 0.011 |
| Mmp2         | 0.002665558 | 1.31562589 | 0.015 | 0.005 | 1 KO | Mmp2        | 0.01  |
| Ift81        | 0.003281061 | 0.74049017 | 0.013 | 0.004 | 1 KO | Ift81       | 0.009 |
| Rab44        | 0.003391334 | 0.78344093 | 0.019 | 0.007 | 1 KO | Rab44       | 0.012 |
| Rnase4       | 0.003612274 | 0.85319848 | 0.34  | 0.265 | 1 KO | Rnase4      | 0.075 |
| Adam33       | 0.003781402 | 1.06122551 | 0.012 | 0.004 | 1 KO | Adam33      | 0.008 |
| Cdh1         | 0.003791444 | 1.4864621  | 0.012 | 0.004 | 1 KO | Cdh1        | 0.008 |
| Camk2n1      | 0.003818339 | 0.85896569 | 0.012 | 0.004 | 1 KO | Camk2n1     | 0.008 |
| Mybpc3       | 0.003842014 | 0.74353716 | 0.012 | 0.004 | 1 KO | Mybpc3      | 0.008 |
| Ccdc126      | 0.004030899 | 0.74667018 | 0.035 | 0.018 | 1 KO | Ccdc126     | 0.017 |
| Zbtb10       | 0.004377447 | 1.03444481 | 0.015 | 0.005 | 1 KO | Zbtb10      | 0.01  |
| Olfir920     | 0.005032992 | 0.8846069  | 0.027 | 0.013 | 1 KO | Olfir920    | 0.014 |
| Tns2         | 0.00527329  | 1.36623264 | 0.013 | 0.005 | 1 KO | Tns2        | 0.008 |
| Ckm          | 0.006404429 | 1.75886209 | 0.012 | 0.004 | 1 KO | Ckm         | 0.008 |
| Il17rc       | 0.006678446 | 1.33118532 | 0.015 | 0.005 | 1 KO | Il17rc      | 0.01  |
| Patj         | 0.007704655 | 1.13883814 | 0.011 | 0.003 | 1 KO | Patj        | 0.008 |
| Gimap9       | 0.007838536 | 1.01798993 | 0.016 | 0.006 | 1 KO | Gimap9      | 0.01  |

|              |             |            |       |       |      |             |       |
|--------------|-------------|------------|-------|-------|------|-------------|-------|
| Rgs12        | 0.008198804 | 0.84236826 | 0.023 | 0.011 | 1 KO | Rgs12       | 0.012 |
| Rab6b        | 0.00822795  | 0.76131381 | 0.013 | 0.005 | 1 KO | Rab6b       | 0.008 |
| A330069E16R  | 0.008440451 | 1.02756084 | 0.017 | 0.007 | 1 KO | A330069E16  | 0.01  |
| C030034I22Ri | 0.008795774 | 0.76739247 | 0.017 | 0.007 | 1 KO | C030034I22F | 0.01  |
| Urb2         | 0.009621488 | 0.87617128 | 0.031 | 0.016 | 1 KO | Urb2        | 0.015 |
| Oplah        | 0.009680676 | 1.41751664 | 0.015 | 0.006 | 1 KO | Oplah       | 0.009 |
