# Supplementary material
Source: PubMed Central journal article supplement (PMC8940682)
Supplement: NIHMS1773905-supplement-23.pdf [file NIHMS1773905-supplement-23.pdf]

**Supplemental Table 11. Gene Expression Fold Change in Melanocytes of WT vs. RNL5 KO tumors**

| gene_name | p_val       | avg_log2FC | pct.1 | pct.2 | p_val_adj   | cluster | gene    | pct.diff |
|-----------|-------------|------------|-------|-------|-------------|---------|---------|----------|
| Hbb-bs    | 5.90868E-45 | 7.55888773 | 0.995 | 0.312 | 1.83482E-40 | WT      | Hbb-bs  | 0.683    |
| Hbb-bt    | 1.79777E-37 | 9.99750509 | 0.883 | 0.025 | 5.5826E-33  | WT      | Hbb-bt  | 0.858    |
| Hba-a1    | 1.18215E-35 | 7.41549996 | 0.891 | 0.062 | 3.67092E-31 | WT      | Hba-a1  | 0.829    |
| Hba-a2    | 1.24415E-31 | 6.13210159 | 0.854 | 0.062 | 3.86346E-27 | WT      | Hba-a2  | 0.792    |
| mt-Atp8   | 3.32913E-19 | 1.98277777 | 0.978 | 0.625 | 1.03379E-14 | WT      | mt-Atp8 | 0.353    |
| mt-Atp6   | 3.74206E-19 | 1.67161669 | 1     | 0.95  | 1.16202E-14 | WT      | mt-Atp6 | 0.05     |
| Gm26917   | 2.47068E-12 | 2.92931077 | 0.715 | 0.288 | 7.67221E-08 | WT      | Gm26917 | 0.427    |
| mt-Co2    | 2.2188E-11  | 1.00097743 | 1     | 0.887 | 6.89005E-07 | WT      | mt-Co2  | 0.113    |
| H2afj     | 2.92159E-11 | 1.38663162 | 0.777 | 0.575 | 9.07241E-07 | WT      | H2afj   | 0.202    |
| Fabp4     | 6.59809E-11 | 7.26817854 | 0.376 | 0     | 2.0489E-06  | WT      | Fabp4   | 0.376    |
| mt-Cytb   | 7.99196E-11 | 0.85376492 | 0.998 | 0.875 | 2.48174E-06 | WT      | mt-Cytb | 0.123    |
| mt-Co3    | 1.15821E-10 | 1.00254045 | 1     | 0.838 | 3.59659E-06 | WT      | mt-Co3  | 0.162    |
| Ier3      | 1.00209E-09 | 2.71228494 | 0.525 | 0.188 | 3.11178E-05 | WT      | Ier3    | 0.337    |
| S100a8    | 1.04543E-07 | 6.02537644 | 0.293 | 0.013 | 0.003246388 | WT      | S100a8  | 0.28     |
| Tmsb4x    | 1.83824E-07 | 1.02032892 | 0.886 | 0.675 | 0.005708283 | WT      | Tmsb4x  | 0.211    |
| Malat1    | 3.02932E-07 | 0.73743491 | 0.832 | 0.65  | 0.009406947 | WT      | Malat1  | 0.182    |
| S100a9    | 3.45719E-07 | 6.71385549 | 0.257 | 0     | 0.010735625 | WT      | S100a9  | 0.257    |
| Ctla2a    | 8.86598E-07 | 4.58456228 | 0.281 | 0.025 | 0.027531533 | WT      | Ctla2a  | 0.256    |
| Lgals1    | 1.42675E-06 | 0.80225642 | 0.956 | 0.825 | 0.044304813 | WT      | Lgals1  | 0.131    |
| Apoe      | 3.43787E-06 | 0.94681171 | 0.861 | 0.738 | 0.106756157 | WT      | Apoe    | 0.123    |
| Ldhd      | 4.13468E-06 | 1.58678672 | 0.55  | 0.362 | 0.128394068 | WT      | Ldhd    | 0.188    |
| Igf1bp7   | 4.23287E-06 | 6.33927068 | 0.217 | 0     | 0.131443358 | WT      | Igf1bp7 | 0.217    |
| Clcn3     | 7.60372E-06 | 1.92054633 | 0.431 | 0.162 | 0.236118312 | WT      | Clcn3   | 0.269    |
| Alas2     | 8.30444E-06 | 6.84207601 | 0.206 | 0     | 0.257877858 | WT      | Alas2   | 0.206    |
| Hilpda    | 1.16517E-05 | 1.82154672 | 0.403 | 0.162 | 0.361820715 | WT      | Hilpda  | 0.241    |
| Nat6      | 1.59074E-05 | 2.66744616 | 0.334 | 0.1   | 0.493971038 | WT      | Nat6    | 0.234    |
| S100a6    | 2.10485E-05 | 1.02691501 | 0.506 | 0.225 | 0.65362009  | WT      | S100a6  | 0.281    |
| Phlda3    | 2.97768E-05 | 1.69602094 | 0.363 | 0.138 | 0.924657914 | WT      | Phlda3  | 0.225    |
| Cdkn1a    | 3.23779E-05 | 1.68469394 | 0.42  | 0.2   | 1           | WT      | Cdkn1a  | 0.22     |
| Ptp4a3    | 6.72617E-05 | 3.95773525 | 0.209 | 0.025 | 1           | WT      | Ptp4a3  | 0.184    |
| Gsta4     | 7.087E-05   | 0.73238221 | 0.353 | 0.112 | 1           | WT      | Gsta4   | 0.241    |
| Nktr      | 7.31987E-05 | 1.16315354 | 0.561 | 0.338 | 1           | WT      | Nktr    | 0.223    |
| Ecsr      | 7.60058E-05 | 3.06029569 | 0.271 | 0.075 | 1           | WT      | Ecsr    | 0.196    |
| Tigd2     | 9.7492E-05  | 1.91563651 | 0.285 | 0.075 | 1           | WT      | Tigd2   | 0.21     |
| C1qb      | 0.00010057  | 2.42790186 | 0.261 | 0.062 | 1           | WT      | C1qb    | 0.199    |
| Neat1     | 0.000110805 | 0.84521173 | 0.615 | 0.425 | 1           | WT      | Neat1   | 0.19     |
| Bmt2      | 0.000114144 | 2.44006872 | 0.276 | 0.075 | 1           | WT      | Bmt2    | 0.201    |
| Gm47283   | 0.000116157 | 1.83784014 | 0.477 | 0.262 | 1           | WT      | Gm47283 | 0.215    |
| Bhlhe40   | 0.000137139 | 1.18580107 | 0.488 | 0.275 | 1           | WT      | Bhlhe40 | 0.213    |
| Ugdh      | 0.000175565 | 1.20769214 | 0.326 | 0.112 | 1           | WT      | Ugdh    | 0.214    |
| Rif       | 0.000184424 | 1.48280912 | 0.406 | 0.188 | 1           | WT      | Rif     | 0.218    |
| Pcyt2     | 0.000185784 | 1.69283278 | 0.341 | 0.125 | 1           | WT      | Pcyt2   | 0.216    |
| Acta2     | 0.000187777 | 5.51768724 | 0.152 | 0     | 1           | WT      | Acta2   | 0.152    |
| Prdx5     | 0.000193822 | 1.72659451 | 0.41  | 0.212 | 1           | WT      | Prdx5   | 0.198    |
| March2    | 0.000266051 | 2.66968332 | 0.23  | 0.05  | 1           | WT      | March2  | 0.18     |
| Cort      | 0.000298756 | 1.28391048 | 0.333 | 0.125 | 1           | WT      | Cort    | 0.208    |
| Blvrb     | 0.000302416 | 1.09860429 | 0.349 | 0.138 | 1           | WT      | Blvrb   | 0.211    |
| Cav2      | 0.00030375  | 1.06395119 | 0.29  | 0.088 | 1           | WT      | Cav2    | 0.202    |
| Fuca1     | 0.000305059 | 1.52133476 | 0.415 | 0.225 | 1           | WT      | Fuca1   | 0.19     |
| Flywch2   | 0.000319747 | 2.24597285 | 0.208 | 0.038 | 1           | WT      | Flywch2 | 0.17     |

|             |             |            |       |       |      |             |       |
|-------------|-------------|------------|-------|-------|------|-------------|-------|
| Ttc19       | 0.000344338 | 1.93567042 | 0.26  | 0.075 | 1 WT | Ttc19       | 0.185 |
| Avl9        | 0.000399219 | 2.10301365 | 0.241 | 0.062 | 1 WT | Avl9        | 0.179 |
| Iscu        | 0.000412772 | 1.01614992 | 0.328 | 0.138 | 1 WT | Iscu        | 0.19  |
| Hist1h1c    | 0.000423996 | 1.40096328 | 0.347 | 0.15  | 1 WT | Hist1h1c    | 0.197 |
| Egfl7       | 0.000455276 | 3.3283549  | 0.16  | 0.013 | 1 WT | Egfl7       | 0.147 |
| Fam212a     | 0.000513228 | 1.4596122  | 0.222 | 0.05  | 1 WT | Fam212a     | 0.172 |
| Ech1        | 0.000628685 | 1.42456139 | 0.338 | 0.15  | 1 WT | Ech1        | 0.188 |
| Azgp1       | 0.000690856 | 3.89880281 | 0.128 | 0     | 1 WT | Azgp1       | 0.128 |
| Nradd       | 0.000722668 | 3.57043659 | 0.151 | 0.013 | 1 WT | Nradd       | 0.138 |
| Gm15417     | 0.000797961 | 1.37809575 | 0.228 | 0.062 | 1 WT | Gm15417     | 0.166 |
| Lama4       | 0.000835659 | 1.68067915 | 0.227 | 0.062 | 1 WT | Lama4       | 0.165 |
| Sh3bgrl3    | 0.000874438 | 1.32622744 | 0.469 | 0.288 | 1 WT | Sh3bgrl3    | 0.181 |
| Dcxr        | 0.000901384 | 1.71987412 | 0.241 | 0.075 | 1 WT | Dcxr        | 0.166 |
| Cope        | 0.000955292 | 0.9241385  | 0.536 | 0.375 | 1 WT | Cope        | 0.161 |
| Bgn         | 0.000971413 | 5.21768072 | 0.122 | 0     | 1 WT | Bgn         | 0.122 |
| Emilin1     | 0.001059759 | 1.45432517 | 0.211 | 0.05  | 1 WT | Emilin1     | 0.161 |
| 1700003F12R | 0.001067797 | 1.17771201 | 0.45  | 0.288 | 1 WT | 1700003F12R | 0.162 |
| Hist1h1d    | 0.001118382 | 4.15097035 | 0.162 | 0.025 | 1 WT | Hist1h1d    | 0.137 |
| Gbe1        | 0.001153749 | 1.08662089 | 0.349 | 0.162 | 1 WT | Gbe1        | 0.187 |
| Mrps31      | 0.001187649 | 1.80745435 | 0.187 | 0.038 | 1 WT | Mrps31      | 0.149 |
| Hist2h2aa1  | 0.001284629 | 3.49980141 | 0.139 | 0.013 | 1 WT | Hist2h2aa1  | 0.126 |
| Zfp560      | 0.001299649 | 1.55523177 | 0.257 | 0.088 | 1 WT | Zfp560      | 0.169 |
| Lpcat2      | 0.001308176 | 1.53497518 | 0.334 | 0.162 | 1 WT | Lpcat2      | 0.172 |
| Fam46c      | 0.001348444 | 4.14530563 | 0.138 | 0.013 | 1 WT | Fam46c      | 0.125 |
| Tmem60      | 0.001351745 | 0.84317146 | 0.287 | 0.112 | 1 WT | Tmem60      | 0.175 |
| Cd81        | 0.00150676  | 1.13621656 | 0.509 | 0.4   | 1 WT | Cd81        | 0.109 |
| BC005561    | 0.001511308 | 1.14505715 | 0.307 | 0.125 | 1 WT | BC005561    | 0.182 |
| Cmtm5       | 0.001566724 | 2.07972167 | 0.138 | 0.013 | 1 WT | Cmtm5       | 0.125 |
| Ecm1        | 0.001599684 | 1.18461901 | 0.268 | 0.1   | 1 WT | Ecm1        | 0.168 |
| AC149090.1  | 0.001626797 | 0.8983175  | 0.591 | 0.4   | 1 WT | AC149090.1  | 0.191 |
| H3f3b       | 0.00165902  | 0.783975   | 0.837 | 0.812 | 1 WT | H3f3b       | 0.025 |
| Camta1      | 0.001686492 | 1.84745167 | 0.223 | 0.075 | 1 WT | Camta1      | 0.148 |
| Ifitm2      | 0.001758923 | 0.81658681 | 0.544 | 0.425 | 1 WT | Ifitm2      | 0.119 |
| Tuba4a      | 0.001837405 | 1.45217887 | 0.306 | 0.138 | 1 WT | Tuba4a      | 0.168 |
| Selenom     | 0.001932858 | 1.03082448 | 0.496 | 0.362 | 1 WT | Selenom     | 0.134 |
| Hist1h1e    | 0.001958014 | 1.85036485 | 0.228 | 0.075 | 1 WT | Hist1h1e    | 0.153 |
| 1600020E01R | 0.001974098 | 2.0729288  | 0.195 | 0.05  | 1 WT | 1600020E01R | 0.145 |
| Snhg9       | 0.002022317 | 1.73243093 | 0.246 | 0.088 | 1 WT | Snhg9       | 0.158 |
| Ddit3       | 0.002098342 | 0.94764849 | 0.471 | 0.312 | 1 WT | Ddit3       | 0.159 |
| Pla2g12a    | 0.002122752 | 1.31572324 | 0.279 | 0.112 | 1 WT | Pla2g12a    | 0.167 |
| Ift22       | 0.002144446 | 2.01603597 | 0.204 | 0.062 | 1 WT | Ift22       | 0.142 |
| Mrps34      | 0.002191279 | 1.34982118 | 0.38  | 0.212 | 1 WT | Mrps34      | 0.168 |
| Bfsp2       | 0.002299784 | 1.55323917 | 0.3   | 0.138 | 1 WT | Bfsp2       | 0.162 |
| Eri3        | 0.00235324  | 2.52429406 | 0.168 | 0.038 | 1 WT | Eri3        | 0.13  |
| Wfdc17      | 0.002378011 | 3.74415415 | 0.147 | 0.025 | 1 WT | Wfdc17      | 0.122 |
| Col4a1      | 0.002447167 | 2.34408124 | 0.166 | 0.038 | 1 WT | Col4a1      | 0.128 |
| Gabarap     | 0.002488033 | 0.83481254 | 0.564 | 0.475 | 1 WT | Gabarap     | 0.089 |
| Nudt22      | 0.002543145 | 1.83329347 | 0.151 | 0.025 | 1 WT | Nudt22      | 0.126 |
| Mpv17l2     | 0.002577179 | 1.0914224  | 0.333 | 0.162 | 1 WT | Mpv17l2     | 0.171 |
| Ethe1       | 0.002632799 | 1.74306802 | 0.209 | 0.062 | 1 WT | Ethe1       | 0.147 |
| Timp1       | 0.002643198 | 1.76583898 | 0.222 | 0.075 | 1 WT | Timp1       | 0.147 |
| Myo1c       | 0.002861172 | 2.3096767  | 0.203 | 0.062 | 1 WT | Myo1c       | 0.141 |

|             |             |            |       |       |      |             |       |
|-------------|-------------|------------|-------|-------|------|-------------|-------|
| Prdx2       | 0.002886317 | 0.73388655 | 0.669 | 0.637 | 1 WT | Prdx2       | 0.032 |
| F11r        | 0.002891997 | 3.27441918 | 0.101 | 0     | 1 WT | F11r        | 0.101 |
| Mief1       | 0.002909069 | 1.67189583 | 0.17  | 0.038 | 1 WT | Mief1       | 0.132 |
| Fech        | 0.002949851 | 1.70274041 | 0.266 | 0.112 | 1 WT | Fech        | 0.154 |
| Pdpdf       | 0.002972881 | 1.23355218 | 0.428 | 0.288 | 1 WT | Pdpdf       | 0.14  |
| Wsb1        | 0.003018902 | 0.69511405 | 0.395 | 0.2   | 1 WT | Wsb1        | 0.195 |
| Hmga2       | 0.003025914 | 1.25523618 | 0.238 | 0.088 | 1 WT | Hmga2       | 0.15  |
| Pnkd        | 0.003088988 | 0.89123818 | 0.439 | 0.3   | 1 WT | Pnkd        | 0.139 |
| Pear1       | 0.003142161 | 4.45710008 | 0.1   | 0     | 1 WT | Pear1       | 0.1   |
| Mettl22     | 0.003142161 | 2.89619689 | 0.1   | 0     | 1 WT | Mettl22     | 0.1   |
| Alg3        | 0.003175307 | 2.82176545 | 0.146 | 0.025 | 1 WT | Alg3        | 0.121 |
| Htatip2     | 0.003212645 | 1.30469541 | 0.311 | 0.15  | 1 WT | Htatip2     | 0.161 |
| Grhpr       | 0.003218596 | 1.24133763 | 0.345 | 0.188 | 1 WT | Grhpr       | 0.157 |
| Cr1l        | 0.003218866 | 2.31337157 | 0.184 | 0.05  | 1 WT | Cr1l        | 0.134 |
| Apold1      | 0.003227003 | 1.17540656 | 0.442 | 0.275 | 1 WT | Apold1      | 0.167 |
| Ing1        | 0.003238188 | 1.45075394 | 0.233 | 0.088 | 1 WT | Ing1        | 0.145 |
| Orai1       | 0.003288072 | 1.73022562 | 0.146 | 0.025 | 1 WT | Orai1       | 0.121 |
| Sugp2       | 0.003413545 | 4.24269195 | 0.098 | 0     | 1 WT | Sugp2       | 0.098 |
| Tsr3        | 0.003425045 | 0.96851451 | 0.208 | 0.062 | 1 WT | Tsr3        | 0.146 |
| Glt8d1      | 0.003430714 | 2.9167941  | 0.122 | 0.013 | 1 WT | Glt8d1      | 0.109 |
| Proser2     | 0.003452287 | 3.77176547 | 0.12  | 0.013 | 1 WT | Proser2     | 0.107 |
| Vamp5       | 0.003466685 | 1.21939457 | 0.452 | 0.312 | 1 WT | Vamp5       | 0.14  |
| Fam8a1      | 0.003470074 | 0.87758105 | 0.2   | 0.062 | 1 WT | Fam8a1      | 0.138 |
| Ucp2        | 0.003506556 | 1.63226921 | 0.163 | 0.038 | 1 WT | Ucp2        | 0.125 |
| Ypel5       | 0.003509124 | 2.11390745 | 0.181 | 0.05  | 1 WT | Ypel5       | 0.131 |
| Hmox2       | 0.003620756 | 0.79915444 | 0.242 | 0.088 | 1 WT | Hmox2       | 0.154 |
| Rnf139      | 0.003665573 | 1.03924277 | 0.165 | 0.038 | 1 WT | Rnf139      | 0.127 |
| Ebpl        | 0.003675845 | 1.91871237 | 0.217 | 0.075 | 1 WT | Ebpl        | 0.142 |
| Cd24a       | 0.003707926 | 5.02138638 | 0.097 | 0     | 1 WT | Cd24a       | 0.097 |
| Gtf2b       | 0.003905224 | 1.16684744 | 0.281 | 0.125 | 1 WT | Gtf2b       | 0.156 |
| Qrsl1       | 0.004296884 | 1.82514061 | 0.141 | 0.025 | 1 WT | Qrsl1       | 0.116 |
| Syn1        | 0.004359252 | 4.78026253 | 0.114 | 0.013 | 1 WT | Syn1        | 0.101 |
| Tcirg1      | 0.004370741 | 1.40480263 | 0.423 | 0.262 | 1 WT | Tcirg1      | 0.161 |
| Glmn        | 0.004373536 | 3.10539384 | 0.094 | 0     | 1 WT | Glmn        | 0.094 |
| Tubb2a      | 0.004447546 | 1.407757   | 0.162 | 0.038 | 1 WT | Tubb2a      | 0.124 |
| Enkd1       | 0.004571414 | 2.86343089 | 0.136 | 0.025 | 1 WT | Enkd1       | 0.111 |
| Rhoc        | 0.004670937 | 1.08815231 | 0.447 | 0.312 | 1 WT | Rhoc        | 0.135 |
| Zfp292      | 0.004673247 | 0.77606843 | 0.376 | 0.212 | 1 WT | Zfp292      | 0.164 |
| Casp6       | 0.004725246 | 1.86090675 | 0.157 | 0.038 | 1 WT | Casp6       | 0.119 |
| Yif1b       | 0.004726288 | 1.2414664  | 0.311 | 0.15  | 1 WT | Yif1b       | 0.161 |
| Tns2        | 0.004855852 | 2.06457996 | 0.135 | 0.025 | 1 WT | Tns2        | 0.11  |
| Coq10a      | 0.004951408 | 1.62826475 | 0.197 | 0.062 | 1 WT | Coq10a      | 0.135 |
| Nfxl1       | 0.004982813 | 2.99375579 | 0.114 | 0.013 | 1 WT | Nfxl1       | 0.101 |
| Fbxw9       | 0.005092682 | 2.62854895 | 0.133 | 0.025 | 1 WT | Fbxw9       | 0.108 |
| Plpp5       | 0.005108806 | 2.75116475 | 0.133 | 0.025 | 1 WT | Plpp5       | 0.108 |
| Plpp2       | 0.005124614 | 1.10902911 | 0.307 | 0.15  | 1 WT | Plpp2       | 0.157 |
| Myo1b       | 0.005368168 | 2.30912032 | 0.203 | 0.075 | 1 WT | Myo1b       | 0.128 |
| 1700025G04F | 0.005407045 | 2.98121286 | 0.133 | 0.025 | 1 WT | 1700025G04F | 0.108 |
| Atraid      | 0.005445825 | 1.33693207 | 0.338 | 0.188 | 1 WT | Atraid      | 0.15  |
| Rnf19a      | 0.005565146 | 1.94906688 | 0.247 | 0.112 | 1 WT | Rnf19a      | 0.135 |
| Hist1h4h    | 0.005598013 | 4.11211947 | 0.089 | 0     | 1 WT | Hist1h4h    | 0.089 |
| Gfer        | 0.005610217 | 1.57494973 | 0.3   | 0.15  | 1 WT | Gfer        | 0.15  |

|             |             |            |       |       |      |             |       |
|-------------|-------------|------------|-------|-------|------|-------------|-------|
| Lcorl       | 0.005623882 | 1.84865373 | 0.192 | 0.062 | 1 WT | Lcorl       | 0.13  |
| Gm10639     | 0.005652558 | 2.86583767 | 0.132 | 0.025 | 1 WT | Gm10639     | 0.107 |
| Tmem87b     | 0.005695813 | 0.86941379 | 0.284 | 0.138 | 1 WT | Tmem87b     | 0.146 |
| Gadd45b     | 0.005706133 | 2.97254625 | 0.132 | 0.025 | 1 WT | Gadd45b     | 0.107 |
| Vegfa       | 0.005728837 | 1.35122536 | 0.352 | 0.2   | 1 WT | Vegfa       | 0.152 |
| Fcer1g      | 0.005733853 | 2.49355286 | 0.217 | 0.088 | 1 WT | Fcer1g      | 0.129 |
| Col18a1     | 0.005755377 | 4.23031881 | 0.109 | 0.013 | 1 WT | Col18a1     | 0.096 |
| Cirbp       | 0.005824369 | 1.18833716 | 0.382 | 0.238 | 1 WT | Cirbp       | 0.144 |
| Spata7      | 0.006061527 | 2.74558995 | 0.111 | 0.013 | 1 WT | Spata7      | 0.098 |
| Pxmp4       | 0.006061527 | 2.68200427 | 0.111 | 0.013 | 1 WT | Pxmp4       | 0.098 |
| Nt5dc2      | 0.006143827 | 1.62824886 | 0.17  | 0.05  | 1 WT | Nt5dc2      | 0.12  |
| Med31       | 0.006149151 | 1.41084123 | 0.239 | 0.1   | 1 WT | Med31       | 0.139 |
| Zfp281      | 0.006227083 | 0.90689963 | 0.241 | 0.1   | 1 WT | Zfp281      | 0.141 |
| Tradd       | 0.006340832 | 1.46884101 | 0.154 | 0.038 | 1 WT | Tradd       | 0.116 |
| Cd68        | 0.006373064 | 3.66381215 | 0.128 | 0.025 | 1 WT | Cd68        | 0.103 |
| Nif3l1      | 0.006386073 | 0.84583899 | 0.192 | 0.062 | 1 WT | Nif3l1      | 0.13  |
| Mgst3       | 0.006429665 | 1.15591069 | 0.193 | 0.062 | 1 WT | Mgst3       | 0.131 |
| Kn1l        | 0.006552069 | 2.21924095 | 0.13  | 0.025 | 1 WT | Kn1l        | 0.105 |
| S100a11     | 0.006581496 | 1.05983992 | 0.448 | 0.3   | 1 WT | S100a11     | 0.148 |
| Babam1      | 0.006590879 | 1.28229956 | 0.282 | 0.138 | 1 WT | Babam1      | 0.144 |
| Hist1h2bb   | 0.006596097 | 4.19688141 | 0.086 | 0     | 1 WT | Hist1h2bb   | 0.086 |
| Slc19a2     | 0.006596097 | 3.66288162 | 0.086 | 0     | 1 WT | Slc19a2     | 0.086 |
| Car6        | 0.006705903 | 1.01709723 | 0.479 | 0.362 | 1 WT | Car6        | 0.117 |
| Tmem203     | 0.006958098 | 1.99333403 | 0.17  | 0.05  | 1 WT | Tmem203     | 0.12  |
| Borcs6      | 0.006982278 | 1.64482584 | 0.203 | 0.075 | 1 WT | Borcs6      | 0.128 |
| Tspan12     | 0.007115809 | 1.31067887 | 0.204 | 0.075 | 1 WT | Tspan12     | 0.129 |
| Gm5914      | 0.007159039 | 3.10665439 | 0.084 | 0     | 1 WT | Gm5914      | 0.084 |
| Itga4       | 0.007414835 | 3.22207954 | 0.106 | 0.013 | 1 WT | Itga4       | 0.093 |
| 1110059G10F | 0.007647475 | 1.60351583 | 0.184 | 0.062 | 1 WT | 1110059G10F | 0.122 |
| Retnlg      | 0.007769368 | 4.42285325 | 0.082 | 0     | 1 WT | Retnlg      | 0.082 |
| Cacfd1      | 0.007778386 | 1.41590275 | 0.165 | 0.05  | 1 WT | Cacfd1      | 0.115 |
| Cdhr4       | 0.007799488 | 2.5599178  | 0.106 | 0.013 | 1 WT | Cdhr4       | 0.093 |
| Eid1        | 0.007858138 | 0.79478439 | 0.501 | 0.362 | 1 WT | Eid1        | 0.139 |
| Col1a1      | 0.007868065 | 3.16185653 | 0.143 | 0.038 | 1 WT | Col1a1      | 0.105 |
| Bpgm        | 0.007901318 | 1.79529097 | 0.295 | 0.15  | 1 WT | Bpgm        | 0.145 |
| Intu        | 0.007932826 | 1.8602133  | 0.146 | 0.038 | 1 WT | Intu        | 0.108 |
| Trappc5     | 0.008008092 | 1.29723694 | 0.288 | 0.15  | 1 WT | Trappc5     | 0.138 |
| Cpeb2       | 0.008036401 | 3.01987005 | 0.105 | 0.013 | 1 WT | Cpeb2       | 0.092 |
| Zfp518b     | 0.008311751 | 2.66924446 | 0.105 | 0.013 | 1 WT | Zfp518b     | 0.092 |
| Agpat2      | 0.008314762 | 0.76656802 | 0.149 | 0.038 | 1 WT | Agpat2      | 0.111 |
| Rab33b      | 0.008512065 | 2.44375815 | 0.143 | 0.038 | 1 WT | Rab33b      | 0.105 |
| C1qa        | 0.00853699  | 2.84134801 | 0.174 | 0.062 | 1 WT | C1qa        | 0.112 |
| At1l        | 0.008560092 | 2.76926101 | 0.122 | 0.025 | 1 WT | At1l        | 0.097 |
| Trim2       | 0.008568618 | 1.25919375 | 0.185 | 0.062 | 1 WT | Trim2       | 0.123 |
| Stk3        | 0.008635338 | 1.37176468 | 0.185 | 0.062 | 1 WT | Stk3        | 0.123 |
| Ggh         | 0.0086369   | 0.86788189 | 0.252 | 0.112 | 1 WT | Ggh         | 0.14  |
| Adm         | 0.008688994 | 2.50873911 | 0.141 | 0.038 | 1 WT | Adm         | 0.103 |
| Etfrf1      | 0.008754117 | 1.26393807 | 0.249 | 0.112 | 1 WT | Etfrf1      | 0.137 |
| Dnajc30     | 0.008827166 | 1.20385747 | 0.149 | 0.038 | 1 WT | Dnajc30     | 0.111 |
| Isyna1      | 0.008960484 | 2.11399953 | 0.162 | 0.05  | 1 WT | Isyna1      | 0.112 |
| S100a1      | 0.008989867 | 0.99325053 | 0.463 | 0.338 | 1 WT | S100a1      | 0.125 |
| Ddit4       | 0.009036865 | 1.17912775 | 0.201 | 0.075 | 1 WT | Ddit4       | 0.126 |

|             |             |            |       |       |             |      |             |       |
|-------------|-------------|------------|-------|-------|-------------|------|-------------|-------|
| Txndc12     | 0.00903903  | 1.56982088 | 0.26  | 0.125 |             | 1 WT | Txndc12     | 0.135 |
| 0610012G03F | 0.009144148 | 0.98397288 | 0.466 | 0.388 |             | 1 WT | 0610012G03F | 0.078 |
| 1500009L16R | 0.00914842  | 3.57978042 | 0.079 | 0     |             | 1 WT | 1500009L16R | 0.079 |
| Spata24     | 0.00914842  | 3.03121998 | 0.079 | 0     |             | 1 WT | Spata24     | 0.079 |
| C1qc        | 0.009439273 | 2.08656767 | 0.103 | 0.013 |             | 1 WT | C1qc        | 0.09  |
| Inafm2      | 0.009452199 | 1.90297181 | 0.122 | 0.025 |             | 1 WT | Inafm2      | 0.097 |
| Clip2       | 0.009477056 | 2.07451191 | 0.177 | 0.062 |             | 1 WT | Clip2       | 0.115 |
| Crip1       | 0.009804752 | 0.71245529 | 0.374 | 0.225 |             | 1 WT | Crip1       | 0.149 |
| Pnpo        | 0.009926129 | 4.18540165 | 0.078 | 0     |             | 1 WT | Pnpo        | 0.078 |
| Igfbp3      | 0.009953327 | 3.91254359 | 0.1   | 0.013 |             | 1 WT | Igfbp3      | 0.087 |
| Polr2d      | 0.009963764 | 1.16943321 | 0.249 | 0.112 |             | 1 WT | Polr2d      | 0.137 |
| Gbp2        | 7.76182E-21 | 3.18887001 | 0.438 | 0.087 | 2.41028E-16 | KO   | Gbp2        | 0.351 |
| Cd74        | 1.64215E-20 | 2.60421644 | 0.675 | 0.239 | 5.09936E-16 | KO   | Cd74        | 0.436 |
| Pabpc1      | 2.81946E-20 | 1.56836882 | 0.9   | 0.645 | 8.75527E-16 | KO   | Pabpc1      | 0.255 |
| H2-Aa       | 6.58433E-19 | 2.84823506 | 0.488 | 0.122 | 2.04463E-14 | KO   | H2-Aa       | 0.366 |
| Gbp4        | 3.58157E-18 | 4.53038633 | 0.262 | 0.03  | 1.11218E-13 | KO   | Gbp4        | 0.232 |
| Retnla      | 2.42125E-17 | 5.81027874 | 0.112 | 0     | 7.5187E-13  | KO   | Retnla      | 0.112 |
| Psmb9       | 1.07747E-16 | 2.37057354 | 0.613 | 0.25  | 3.34586E-12 | KO   | Psmb9       | 0.363 |
| Carmil2     | 4.17498E-16 | 2.91302531 | 0.3   | 0.048 | 1.29646E-11 | KO   | Carmil2     | 0.252 |
| Rps26       | 1.174E-15   | 1.14317015 | 0.938 | 0.9   | 3.64563E-11 | KO   | Rps26       | 0.038 |
| Igtp        | 2.12691E-14 | 2.87049505 | 0.375 | 0.092 | 6.6047E-10  | KO   | Igtp        | 0.283 |
| H2-DMa      | 2.69291E-14 | 3.22353137 | 0.275 | 0.046 | 8.36231E-10 | KO   | H2-DMa      | 0.229 |
| Stat1       | 3.07568E-14 | 2.60823416 | 0.525 | 0.2   | 9.55092E-10 | KO   | Stat1       | 0.325 |
| Hsp90aa1    | 5.30396E-14 | 1.31015679 | 0.887 | 0.773 | 1.64704E-09 | KO   | Hsp90aa1    | 0.114 |
| Hnrnpa2b1   | 2.03117E-13 | 1.47202331 | 0.812 | 0.582 | 6.3074E-09  | KO   | Hnrnpa2b1   | 0.23  |
| Apol9b      | 2.37904E-13 | 3.1525029  | 0.225 | 0.032 | 7.38764E-09 | KO   | Apol9b      | 0.193 |
| Rplp2       | 1.42806E-12 | 0.94361083 | 0.938 | 0.842 | 4.43455E-08 | KO   | Rplp2       | 0.096 |
| H2-Eb1      | 1.47195E-12 | 2.56506062 | 0.35  | 0.089 | 4.57084E-08 | KO   | H2-Eb1      | 0.261 |
| Hsp90ab1    | 1.77661E-12 | 0.98029498 | 0.95  | 0.791 | 5.51691E-08 | KO   | Hsp90ab1    | 0.159 |
| Igip1       | 2.55099E-12 | 3.10688624 | 0.312 | 0.073 | 7.92159E-08 | KO   | Igip1       | 0.239 |
| Sem1        | 2.623E-12   | 1.05222928 | 0.85  | 0.742 | 8.14522E-08 | KO   | Sem1        | 0.108 |
| Oxct1       | 4.23179E-12 | 1.27702155 | 0.838 | 0.547 | 1.3141E-07  | KO   | Oxct1       | 0.291 |
| Zbp1        | 7.18884E-12 | 2.51851299 | 0.275 | 0.059 | 2.23235E-07 | KO   | Zbp1        | 0.216 |
| Gbp7        | 9.43961E-12 | 3.12424584 | 0.338 | 0.094 | 2.93128E-07 | KO   | Gbp7        | 0.244 |
| Irgm1       | 1.0172E-11  | 2.50242625 | 0.412 | 0.139 | 3.15872E-07 | KO   | Irgm1       | 0.273 |
| Eef1a1      | 2.42629E-11 | 0.70935181 | 1     | 0.956 | 7.53435E-07 | KO   | Eef1a1      | 0.044 |
| H2-Ab1      | 2.50889E-11 | 2.13676023 | 0.4   | 0.124 | 7.79087E-07 | KO   | H2-Ab1      | 0.276 |
| Rps21       | 2.71097E-11 | 0.76375814 | 0.887 | 0.883 | 8.41836E-07 | KO   | Rps21       | 0.004 |
| Rpl23a      | 1.34155E-10 | 1.19482098 | 0.812 | 0.631 | 4.16593E-06 | KO   | Rpl23a      | 0.181 |
| Nap1l1      | 2.39316E-10 | 1.48269624 | 0.75  | 0.49  | 7.43147E-06 | KO   | Nap1l1      | 0.26  |
| Il1rl1      | 3.0612E-10  | 5.16139639 | 0.062 | 0     | 9.50595E-06 | KO   | Il1rl1      | 0.062 |
| Trpm1       | 5.0062E-10  | 1.4274982  | 0.75  | 0.441 | 1.55458E-05 | KO   | Trpm1       | 0.309 |
| Cbx3        | 7.19435E-10 | 1.42432696 | 0.738 | 0.523 | 2.23406E-05 | KO   | Cbx3        | 0.215 |
| Irgm2       | 9.18633E-10 | 3.44505079 | 0.2   | 0.038 | 2.85263E-05 | KO   | Irgm2       | 0.162 |
| Eif4h       | 1.36251E-09 | 1.52548578 | 0.65  | 0.415 | 4.23099E-05 | KO   | Eif4h       | 0.235 |
| Hspa8       | 1.86258E-09 | 0.94331136 | 0.863 | 0.746 | 5.78386E-05 | KO   | Hspa8       | 0.117 |
| Tap2        | 2.20721E-09 | 2.57622826 | 0.325 | 0.105 | 6.85404E-05 | KO   | Tap2        | 0.22  |
| Gpr132      | 3.17842E-09 | 3.97666184 | 0.088 | 0.005 | 9.86994E-05 | KO   | Gpr132      | 0.083 |
| Cycs        | 3.40127E-09 | 1.03177427 | 0.85  | 0.645 | 0.00010562  | KO   | Cycs        | 0.205 |
| B2m         | 4.28308E-09 | 1.28144332 | 0.875 | 0.753 | 0.000133003 | KO   | B2m         | 0.122 |
| Npm1        | 8.92488E-09 | 0.989579   | 0.925 | 0.761 | 0.000277144 | KO   | Npm1        | 0.164 |
| Snd1        | 1.0492E-08  | 1.80998172 | 0.55  | 0.301 | 0.000325808 | KO   | Snd1        | 0.249 |

|         |             |            |       |       |                |         |        |
|---------|-------------|------------|-------|-------|----------------|---------|--------|
| Serbp1  | 1.11105E-08 | 0.90296028 | 0.838 | 0.685 | 0.000345014 KO | Serbp1  | 0.153  |
| Hspd1   | 1.17612E-08 | 1.0078618  | 0.812 | 0.58  | 0.000365219 KO | Hspd1   | 0.232  |
| Eprs    | 1.28026E-08 | 1.34645799 | 0.688 | 0.437 | 0.000397558 KO | Eprs    | 0.251  |
| Nr4a3   | 1.50479E-08 | 2.24834098 | 0.35  | 0.13  | 0.000467284 KO | Nr4a3   | 0.22   |
| Dcn     | 1.83812E-08 | 2.86972193 | 0.05  | 0     | 0.000570792 KO | Dcn     | 0.05   |
| Rps12   | 1.9141E-08  | 0.74655592 | 0.938 | 0.862 | 0.000594387 KO | Rps12   | 0.076  |
| Hsp90b1 | 1.91695E-08 | 1.14452398 | 0.838 | 0.635 | 0.00059527 KO  | Hsp90b1 | 0.203  |
| Hnrnrm  | 2.49236E-08 | 1.35903965 | 0.65  | 0.412 | 0.000773953 KO | Hnrnrm  | 0.238  |
| Pmel    | 3.03327E-08 | 1.32334728 | 0.887 | 0.864 | 0.000941922 KO | Pmel    | 0.023  |
| Irf1    | 3.08255E-08 | 1.88727615 | 0.225 | 0.055 | 0.000957225 KO | Irf1    | 0.17   |
| Psmb10  | 3.41709E-08 | 1.86758381 | 0.562 | 0.328 | 0.001061109 KO | Psmb10  | 0.234  |
| Snhg6   | 3.87842E-08 | 2.07567678 | 0.5   | 0.274 | 0.001204366 KO | Snhg6   | 0.226  |
| Dct     | 4.00866E-08 | 0.95165684 | 0.975 | 0.975 | 0.00124481 KO  | Dct     | 0      |
| Rps17   | 4.50535E-08 | 0.75566083 | 0.925 | 0.805 | 0.001399045 KO | Rps17   | 0.12   |
| Rpl5    | 5.3828E-08  | 0.76940045 | 0.838 | 0.758 | 0.001671522 KO | Rpl5    | 0.08   |
| Psmb8   | 5.64576E-08 | 1.22429258 | 0.6   | 0.361 | 0.001753177 KO | Psmb8   | 0.239  |
| Set     | 5.79806E-08 | 1.1000317  | 0.75  | 0.561 | 0.001800472 KO | Set     | 0.189  |
| Actg1   | 6.87325E-08 | 0.8356176  | 0.988 | 0.895 | 0.002134349 KO | Actg1   | 0.093  |
| Eif3c   | 6.9675E-08  | 1.55673852 | 0.65  | 0.466 | 0.002163616 KO | Eif3c   | 0.184  |
| Eif3j1  | 1.27117E-07 | 1.78875885 | 0.525 | 0.307 | 0.003947354 KO | Eif3j1  | 0.218  |
| Ywhaz   | 1.30401E-07 | 1.27342346 | 0.713 | 0.456 | 0.004049335 KO | Ywhaz   | 0.257  |
| Eif4g2  | 1.51012E-07 | 1.05746609 | 0.762 | 0.574 | 0.004689369 KO | Eif4g2  | 0.188  |
| Psme1   | 1.53287E-07 | 1.69650499 | 0.6   | 0.428 | 0.004760023 KO | Psme1   | 0.172  |
| Rpl27   | 1.6179E-07  | 1.24211836 | 0.725 | 0.599 | 0.00502407 KO  | Rpl27   | 0.126  |
| Psme2   | 1.84594E-07 | 1.4693058  | 0.6   | 0.39  | 0.005732192 KO | Psme2   | 0.21   |
| Rcc2    | 1.90326E-07 | 1.46969753 | 0.675 | 0.472 | 0.005910193 KO | Rcc2    | 0.203  |
| Prph    | 2.10297E-07 | 3.40845047 | 0.15  | 0.029 | 0.006530361 KO | Prph    | 0.121  |
| Actb    | 2.60126E-07 | 0.80922152 | 0.95  | 0.943 | 0.008077678 KO | Actb    | 0.007  |
| Snrpf   | 2.61922E-07 | 1.11629063 | 0.675 | 0.482 | 0.008133456 KO | Snrpf   | 0.193  |
| Atp1a1  | 2.74222E-07 | 1.04987039 | 0.775 | 0.683 | 0.008515419 KO | Atp1a1  | 0.092  |
| Cs      | 2.74873E-07 | 1.36347741 | 0.55  | 0.325 | 0.008535616 KO | Cs      | 0.225  |
| Rab27a  | 3.23964E-07 | 2.07609652 | 0.438 | 0.22  | 0.010060048 KO | Rab27a  | 0.218  |
| Eif3a   | 3.45514E-07 | 1.4691851  | 0.688 | 0.477 | 0.010729257 KO | Eif3a   | 0.211  |
| Lima1   | 3.5375E-07  | 2.04718082 | 0.537 | 0.328 | 0.010985007 KO | Lima1   | 0.209  |
| Trim28  | 5.63872E-07 | 1.76023342 | 0.5   | 0.293 | 0.017509931 KO | Trim28  | 0.207  |
| Ppfibp2 | 6.16256E-07 | 2.25791338 | 0.25  | 0.082 | 0.019136584 KO | Ppfibp2 | 0.168  |
| Metrn   | 6.58991E-07 | 1.19018246 | 0.675 | 0.452 | 0.020463639 KO | Metrn   | 0.223  |
| Hspe1   | 1.01841E-06 | 0.73958212 | 0.85  | 0.681 | 0.031624747 KO | Hspe1   | 0.169  |
| Txn1    | 1.02139E-06 | 0.70762478 | 0.863 | 0.737 | 0.031717082 KO | Txn1    | 0.126  |
| Ciita   | 1.05858E-06 | 3.42741469 | 0.05  | 0.002 | 0.032872091 KO | Ciita   | 0.048  |
| Rnf213  | 1.09975E-06 | 2.04085991 | 0.338 | 0.149 | 0.034150482 KO | Rnf213  | 0.189  |
| Gm12185 | 1.1234E-06  | 3.79782318 | 0.038 | 0     | 0.034884883 KO | Gm12185 | 0.038  |
| Wdr31   | 1.12478E-06 | 2.62604227 | 0.05  | 0.002 | 0.034927922 KO | Wdr31   | 0.048  |
| Usmg5   | 1.13253E-06 | 0.9216134  | 0.775 | 0.575 | 0.03516839 KO  | Usmg5   | 0.2    |
| Rab38   | 1.38139E-06 | 1.18619817 | 0.625 | 0.406 | 0.042896173 KO | Rab38   | 0.219  |
| Ifi203  | 1.45564E-06 | 2.00340872 | 0.225 | 0.068 | 0.045202076 KO | Ifi203  | 0.157  |
| Calm1   | 1.47357E-06 | 0.86658381 | 0.775 | 0.615 | 0.045758778 KO | Calm1   | 0.16   |
| Tapbp   | 1.47466E-06 | 2.03926522 | 0.425 | 0.219 | 0.045792713 KO | Tapbp   | 0.206  |
| Hnrnpa0 | 1.48167E-06 | 1.29605597 | 0.625 | 0.439 | 0.046010441 KO | Hnrnpa0 | 0.186  |
| Gbp3    | 1.77492E-06 | 2.24116982 | 0.188 | 0.051 | 0.055116745 KO | Gbp3    | 0.137  |
| Tmsb10  | 1.82702E-06 | 0.97783696 | 0.95  | 0.975 | 0.056734426 KO | Tmsb10  | -0.025 |
| Tsen34  | 2.14341E-06 | 1.13270756 | 0.575 | 0.345 | 0.066559381 KO | Tsen34  | 0.23   |

|             |             |            |       |       |                |             |       |
|-------------|-------------|------------|-------|-------|----------------|-------------|-------|
| Vcp         | 2.28832E-06 | 0.99669888 | 0.725 | 0.55  | 0.07105908 KO  | Vcp         | 0.175 |
| Rpl13a      | 2.36636E-06 | 1.13498392 | 0.637 | 0.456 | 0.073482626 KO | Rpl13a      | 0.181 |
| Fosb        | 2.48251E-06 | 2.24965758 | 0.275 | 0.1   | 0.0770895 KO   | Fosb        | 0.175 |
| Rangap1     | 2.49907E-06 | 1.65694857 | 0.55  | 0.35  | 0.07760359 KO  | Rangap1     | 0.2   |
| Anp32b      | 2.502E-06   | 1.04611013 | 0.75  | 0.537 | 0.07769464 KO  | Anp32b      | 0.213 |
| Eif3b       | 2.72602E-06 | 1.23317142 | 0.662 | 0.488 | 0.084651161 KO | Eif3b       | 0.174 |
| Cfl1        | 2.75887E-06 | 0.73573511 | 0.863 | 0.716 | 0.085671048 KO | Cfl1        | 0.147 |
| Ncl         | 2.80123E-06 | 1.10469594 | 0.762 | 0.62  | 0.086986618 KO | Ncl         | 0.142 |
| Hnrnpa1     | 2.8225E-06  | 1.0134775  | 0.75  | 0.578 | 0.087647002 KO | Hnrnpa1     | 0.172 |
| Prrc2a      | 2.88583E-06 | 1.25521817 | 0.588 | 0.399 | 0.08961383 KO  | Prrc2a      | 0.189 |
| Rpn1        | 2.9437E-06  | 1.17147789 | 0.713 | 0.536 | 0.091410644 KO | Rpn1        | 0.177 |
| Got2        | 3.5E-06     | 1.04866211 | 0.637 | 0.425 | 0.108685375 KO | Got2        | 0.212 |
| Cadm1       | 3.73706E-06 | 1.4158892  | 0.6   | 0.407 | 0.116047011 KO | Cadm1       | 0.193 |
| Sept9       | 4.06088E-06 | 1.42328034 | 0.637 | 0.452 | 0.126102441 KO | Sept9       | 0.185 |
| Abcf2       | 4.31149E-06 | 1.86684719 | 0.412 | 0.231 | 0.133884744 KO | Abcf2       | 0.181 |
| Tcea1       | 4.35931E-06 | 1.6934787  | 0.475 | 0.296 | 0.135369749 KO | Tcea1       | 0.179 |
| Tmbim6      | 4.64118E-06 | 0.88061182 | 0.7   | 0.529 | 0.144122555 KO | Tmbim6      | 0.171 |
| H2-D1       | 4.64225E-06 | 1.17648209 | 0.762 | 0.62  | 0.144155883 KO | H2-D1       | 0.142 |
| Snrpg       | 5.38738E-06 | 1.20680436 | 0.625 | 0.469 | 0.16729421 KO  | Snrpg       | 0.156 |
| Cnn2        | 5.41232E-06 | 1.15256175 | 0.362 | 0.162 | 0.168068695 KO | Cnn2        | 0.2   |
| Mitf        | 5.45278E-06 | 1.78048677 | 0.525 | 0.36  | 0.169325192 KO | Mitf        | 0.165 |
| Sdha        | 5.73594E-06 | 1.02262312 | 0.613 | 0.39  | 0.178118236 KO | Sdha        | 0.223 |
| Hdgf        | 5.96708E-06 | 1.11928454 | 0.675 | 0.482 | 0.185295658 KO | Hdgf        | 0.193 |
| Parp9       | 6.88852E-06 | 1.75201957 | 0.238 | 0.084 | 0.213909145 KO | Parp9       | 0.154 |
| Mndal       | 6.99978E-06 | 2.04604233 | 0.262 | 0.101 | 0.217364293 KO | Mndal       | 0.161 |
| Tpm1        | 7.14165E-06 | 1.11327774 | 0.65  | 0.482 | 0.221769606 KO | Tpm1        | 0.168 |
| Slc39a1     | 7.69057E-06 | 2.06518726 | 0.438 | 0.257 | 0.238815177 KO | Slc39a1     | 0.181 |
| Eif2s2      | 7.69671E-06 | 1.13174649 | 0.738 | 0.575 | 0.239005851 KO | Eif2s2      | 0.163 |
| Fus         | 7.92862E-06 | 1.38445402 | 0.675 | 0.51  | 0.246207521 KO | Fus         | 0.165 |
| Cox17       | 8.42651E-06 | 1.22491673 | 0.575 | 0.42  | 0.261668289 KO | Cox17       | 0.155 |
| Larp1       | 9.20325E-06 | 1.78162302 | 0.537 | 0.36  | 0.285788456 KO | Larp1       | 0.177 |
| Sqstm1      | 9.37714E-06 | 0.96562766 | 0.625 | 0.46  | 0.291188417 KO | Sqstm1      | 0.165 |
| Cltc        | 9.74536E-06 | 0.87340463 | 0.7   | 0.515 | 0.302622531 KO | Cltc        | 0.185 |
| Rfc1        | 9.87224E-06 | 1.83610086 | 0.438 | 0.26  | 0.306562688 KO | Rfc1        | 0.178 |
| Tap1        | 1.0312E-05  | 1.84836617 | 0.375 | 0.193 | 0.320218401 KO | Tap1        | 0.182 |
| Marcks      | 1.11553E-05 | 1.28384954 | 0.688 | 0.468 | 0.346404451 KO | Marcks      | 0.22  |
| Ybx3        | 1.15838E-05 | 0.95205037 | 0.675 | 0.51  | 0.359712337 KO | Ybx3        | 0.165 |
| Sec61b      | 1.22655E-05 | 0.85950589 | 0.75  | 0.569 | 0.380879562 KO | Sec61b      | 0.181 |
| Tma7        | 1.38411E-05 | 0.86836765 | 0.725 | 0.499 | 0.429808163 KO | Tma7        | 0.226 |
| Bag3        | 1.38861E-05 | 2.31630286 | 0.325 | 0.157 | 0.431204308 KO | Bag3        | 0.168 |
| Hnrnpab     | 1.51465E-05 | 1.06617978 | 0.713 | 0.539 | 0.470342889 KO | Hnrnpab     | 0.174 |
| 9330159F19R | 1.56201E-05 | 3.36327738 | 0.05  | 0.003 | 0.485051133 KO | 9330159F19R | 0.047 |
| Cxcl14      | 1.58803E-05 | 4.68053889 | 0.05  | 0.003 | 0.493130166 KO | Cxcl14      | 0.047 |
| Hspa4       | 1.61961E-05 | 1.29302232 | 0.6   | 0.41  | 0.502936685 KO | Hspa4       | 0.19  |
| Mta1        | 1.65284E-05 | 2.11291813 | 0.412 | 0.249 | 0.513255397 KO | Mta1        | 0.163 |
| H2-K1       | 1.66878E-05 | 1.30838687 | 0.75  | 0.683 | 0.518206999 KO | H2-K1       | 0.067 |
| H2-T23      | 1.83566E-05 | 1.55307107 | 0.288 | 0.125 | 0.570028049 KO | H2-T23      | 0.163 |
| Rpl36al     | 1.9E-05     | 1.06679514 | 0.688 | 0.536 | 0.590007491 KO | Rpl36al     | 0.152 |
| Ywhae       | 1.95562E-05 | 0.78723134 | 0.825 | 0.653 | 0.607278783 KO | Ywhae       | 0.172 |
| Sox9        | 1.98536E-05 | 1.60585912 | 0.075 | 0.01  | 0.616514185 KO | Sox9        | 0.065 |
| Aacs        | 2.34873E-05 | 2.21627798 | 0.238 | 0.095 | 0.729349607 KO | Aacs        | 0.143 |
| Grb2        | 2.54925E-05 | 1.59776364 | 0.45  | 0.281 | 0.79161768 KO  | Grb2        | 0.169 |

|             |             |            |       |       |                |             |       |
|-------------|-------------|------------|-------|-------|----------------|-------------|-------|
| Ahsa1       | 2.66122E-05 | 1.50015027 | 0.462 | 0.306 | 0.826388823 KO | Ahsa1       | 0.156 |
| Rpl35       | 2.72287E-05 | 0.71004883 | 0.838 | 0.829 | 0.845531635 KO | Rpl35       | 0.009 |
| Wdr1        | 3.15071E-05 | 1.35994154 | 0.575 | 0.425 | 0.97839011 KO  | Wdr1        | 0.15  |
| Gstp1       | 3.18365E-05 | 1.09759975 | 0.65  | 0.507 | 0.98861849 KO  | Gstp1       | 0.143 |
| Sod1        | 3.34144E-05 | 0.82695895 | 0.637 | 0.475 | 1 KO           | Sod1        | 0.162 |
| Top1        | 3.84453E-05 | 1.38802476 | 0.537 | 0.39  | 1 KO           | Top1        | 0.147 |
| Apol9a      | 3.87308E-05 | 2.62237432 | 0.125 | 0.03  | 1 KO           | Apol9a      | 0.095 |
| Atp6v1b2    | 4.05526E-05 | 1.43546098 | 0.6   | 0.415 | 1 KO           | Atp6v1b2    | 0.185 |
| Abce1       | 4.33642E-05 | 1.43562227 | 0.45  | 0.282 | 1 KO           | Abce1       | 0.168 |
| Ccdc90b     | 4.38049E-05 | 2.2925363  | 0.238 | 0.1   | 1 KO           | Ccdc90b     | 0.138 |
| Psm11       | 4.50111E-05 | 1.07240178 | 0.525 | 0.366 | 1 KO           | Psm11       | 0.159 |
| Klf4        | 4.59039E-05 | 3.3944086  | 0.2   | 0.073 | 1 KO           | Klf4        | 0.127 |
| Nampt       | 4.98798E-05 | 1.37737414 | 0.562 | 0.403 | 1 KO           | Nampt       | 0.159 |
| Dctn1       | 5.27993E-05 | 1.76615939 | 0.488 | 0.334 | 1 KO           | Dctn1       | 0.154 |
| Morf4l1     | 5.39277E-05 | 0.73680723 | 0.7   | 0.488 | 1 KO           | Morf4l1     | 0.212 |
| Tspan10     | 5.42404E-05 | 1.83929417 | 0.512 | 0.339 | 1 KO           | Tspan10     | 0.173 |
| Gm17477     | 5.47696E-05 | 1.75547548 | 0.038 | 0.002 | 1 KO           | Gm17477     | 0.036 |
| Erh         | 5.52604E-05 | 1.16841629 | 0.6   | 0.404 | 1 KO           | Erh         | 0.196 |
| Rbm28       | 5.66932E-05 | 1.62069294 | 0.5   | 0.339 | 1 KO           | Rbm28       | 0.161 |
| Gm15564     | 5.7008E-05  | 2.89452069 | 0.075 | 0.011 | 1 KO           | Gm15564     | 0.064 |
| Eif5b       | 6.00883E-05 | 1.04621257 | 0.588 | 0.395 | 1 KO           | Eif5b       | 0.193 |
| Pcbp2       | 6.19675E-05 | 0.87539336 | 0.738 | 0.544 | 1 KO           | Pcbp2       | 0.194 |
| Raf1        | 6.22278E-05 | 1.03968765 | 0.438 | 0.261 | 1 KO           | Raf1        | 0.177 |
| Sf3b2       | 6.68299E-05 | 1.50845585 | 0.562 | 0.403 | 1 KO           | Sf3b2       | 0.159 |
| Nucks1      | 6.73901E-05 | 0.95740871 | 0.675 | 0.488 | 1 KO           | Nucks1      | 0.187 |
| Bst2        | 6.91937E-05 | 1.1457195  | 0.675 | 0.518 | 1 KO           | Bst2        | 0.157 |
| Il6         | 7.14449E-05 | 4.89378944 | 0.025 | 0     | 1 KO           | Il6         | 0.025 |
| Eef1a2      | 7.14449E-05 | 4.18122862 | 0.025 | 0     | 1 KO           | Eef1a2      | 0.025 |
| Ccl24       | 7.14449E-05 | 4.0379403  | 0.025 | 0     | 1 KO           | Ccl24       | 0.025 |
| Stard10     | 7.14449E-05 | 3.51073526 | 0.025 | 0     | 1 KO           | Stard10     | 0.025 |
| Satb1       | 7.14449E-05 | 2.5024738  | 0.025 | 0     | 1 KO           | Satb1       | 0.025 |
| Tomt        | 7.14449E-05 | 2.30099144 | 0.025 | 0     | 1 KO           | Tomt        | 0.025 |
| 2510002D24R | 7.14449E-05 | 2.17510784 | 0.025 | 0     | 1 KO           | 2510002D24R | 0.025 |
| Gpr18       | 7.14449E-05 | 1.59625939 | 0.025 | 0     | 1 KO           | Gpr18       | 0.025 |
| Gm47015     | 7.14449E-05 | 1.55714072 | 0.025 | 0     | 1 KO           | Gm47015     | 0.025 |
| Alx3        | 7.14449E-05 | 1.21476824 | 0.025 | 0     | 1 KO           | Alx3        | 0.025 |
| Hnrnpa3     | 7.19911E-05 | 0.78416647 | 0.725 | 0.545 | 1 KO           | Hnrnpa3     | 0.18  |
| Ost4        | 7.32821E-05 | 0.94471715 | 0.637 | 0.458 | 1 KO           | Ost4        | 0.179 |
| Actr3       | 8.10287E-05 | 1.1417835  | 0.6   | 0.428 | 1 KO           | Actr3       | 0.172 |
| Hnrnpf      | 8.25974E-05 | 0.84280488 | 0.725 | 0.563 | 1 KO           | Hnrnpf      | 0.162 |
| Serpinh1    | 8.83398E-05 | 1.25435421 | 0.575 | 0.436 | 1 KO           | Serpinh1    | 0.139 |
| Socs3       | 8.88245E-05 | 2.50757683 | 0.188 | 0.067 | 1 KO           | Socs3       | 0.121 |
| Canx        | 9.35188E-05 | 0.94386784 | 0.738 | 0.615 | 1 KO           | Canx        | 0.123 |
| Mtap        | 9.38366E-05 | 1.7273891  | 0.462 | 0.301 | 1 KO           | Mtap        | 0.161 |
| Hmgb1       | 9.52412E-05 | 1.0424861  | 0.713 | 0.531 | 1 KO           | Hmgb1       | 0.182 |
| Khsrp       | 0.000100849 | 1.36728679 | 0.462 | 0.301 | 1 KO           | Khsrp       | 0.161 |
| Gdf11       | 0.000104672 | 2.29310477 | 0.125 | 0.033 | 1 KO           | Gdf11       | 0.092 |
| Ktn1        | 0.000105205 | 1.30876252 | 0.55  | 0.387 | 1 KO           | Ktn1        | 0.163 |
| Rexo2       | 0.000107524 | 0.83935698 | 0.625 | 0.461 | 1 KO           | Rexo2       | 0.164 |
| Cox16       | 0.000111415 | 1.19068403 | 0.275 | 0.124 | 1 KO           | Cox16       | 0.151 |
| Bace2       | 0.000127815 | 1.18712331 | 0.537 | 0.38  | 1 KO           | Bace2       | 0.157 |
| Dedd        | 0.000128753 | 1.93341275 | 0.188 | 0.07  | 1 KO           | Dedd        | 0.118 |

|          |             |            |       |       |      |          |       |
|----------|-------------|------------|-------|-------|------|----------|-------|
| Mex3a    | 0.000136205 | 2.72087166 | 0.25  | 0.114 | 1 KO | Mex3a    | 0.136 |
| Axin2    | 0.000136271 | 2.93761115 | 0.088 | 0.017 | 1 KO | Axin2    | 0.071 |
| Hspa1b   | 0.000139375 | 2.16524069 | 0.238 | 0.101 | 1 KO | Hspa1b   | 0.137 |
| Lap3     | 0.000143847 | 1.48135588 | 0.45  | 0.282 | 1 KO | Lap3     | 0.168 |
| Myadm    | 0.000148304 | 1.85586479 | 0.375 | 0.228 | 1 KO | Myadm    | 0.147 |
| U2af2    | 0.000149788 | 1.09796891 | 0.462 | 0.306 | 1 KO | U2af2    | 0.156 |
| Ncaph2   | 0.000149841 | 1.37628969 | 0.45  | 0.295 | 1 KO | Ncaph2   | 0.155 |
| Nckap5l  | 0.000157618 | 1.5570839  | 0.475 | 0.36  | 1 KO | Nckap5l  | 0.115 |
| Mcm2     | 0.000162679 | 1.43118178 | 0.475 | 0.296 | 1 KO | Mcm2     | 0.179 |
| Ifi47    | 0.000169851 | 2.42615114 | 0.262 | 0.125 | 1 KO | Ifi47    | 0.137 |
| Gtf3c1   | 0.000182375 | 2.08084407 | 0.312 | 0.168 | 1 KO | Gtf3c1   | 0.144 |
| Pcna     | 0.000191045 | 1.36925201 | 0.425 | 0.263 | 1 KO | Pcna     | 0.162 |
| Mrpl23   | 0.000196332 | 0.80049936 | 0.588 | 0.415 | 1 KO | Mrpl23   | 0.173 |
| Tmf1     | 0.000199057 | 1.4339287  | 0.488 | 0.349 | 1 KO | Tmf1     | 0.139 |
| Tardbp   | 0.000220703 | 1.28031721 | 0.55  | 0.41  | 1 KO | Tardbp   | 0.14  |
| Sf3b4    | 0.000238721 | 1.53828965 | 0.425 | 0.284 | 1 KO | Sf3b4    | 0.141 |
| Nedd4    | 0.00025241  | 0.91554562 | 0.662 | 0.532 | 1 KO | Nedd4    | 0.13  |
| Il17rc   | 0.000252964 | 1.14343529 | 0.338 | 0.182 | 1 KO | Il17rc   | 0.156 |
| Akap2    | 0.000279867 | 2.45292371 | 0.225 | 0.101 | 1 KO | Akap2    | 0.124 |
| Smarca5  | 0.000286692 | 0.96127608 | 0.512 | 0.36  | 1 KO | Smarca5  | 0.152 |
| Ust      | 0.000289359 | 2.31387847 | 0.062 | 0.01  | 1 KO | Ust      | 0.052 |
| Xlr3a    | 0.000300382 | 2.53389807 | 0.138 | 0.043 | 1 KO | Xlr3a    | 0.095 |
| Eps8     | 0.000304354 | 0.96945289 | 0.625 | 0.445 | 1 KO | Eps8     | 0.18  |
| Glud1    | 0.000308771 | 1.70219747 | 0.388 | 0.249 | 1 KO | Glud1    | 0.139 |
| Gspt1    | 0.000311448 | 1.23163607 | 0.488 | 0.349 | 1 KO | Gspt1    | 0.139 |
| Dbnl     | 0.000311919 | 0.81858986 | 0.537 | 0.369 | 1 KO | Dbnl     | 0.168 |
| Hspa1a   | 0.000319605 | 1.80024875 | 0.088 | 0.019 | 1 KO | Hspa1a   | 0.069 |
| Csnk2b   | 0.000324046 | 0.79726444 | 0.575 | 0.431 | 1 KO | Csnk2b   | 0.144 |
| Adamts14 | 0.000327278 | 2.06908654 | 0.125 | 0.036 | 1 KO | Adamts14 | 0.089 |
| Nol7     | 0.000333485 | 1.18957744 | 0.55  | 0.404 | 1 KO | Nol7     | 0.146 |
| Nars     | 0.000336358 | 1.29668626 | 0.45  | 0.314 | 1 KO | Nars     | 0.136 |
| Mms19    | 0.000347613 | 1.43918659 | 0.288 | 0.149 | 1 KO | Mms19    | 0.139 |
| Csnk2a1  | 0.000375011 | 2.04995126 | 0.375 | 0.233 | 1 KO | Csnk2a1  | 0.142 |
| Cops7a   | 0.000382942 | 1.12566138 | 0.488 | 0.353 | 1 KO | Cops7a   | 0.135 |
| Arpc4    | 0.000395936 | 1.27025806 | 0.462 | 0.33  | 1 KO | Arpc4    | 0.132 |
| Akt1     | 0.000397015 | 0.77906901 | 0.65  | 0.499 | 1 KO | Akt1     | 0.151 |
| Actn4    | 0.000415702 | 1.3323163  | 0.512 | 0.404 | 1 KO | Actn4    | 0.108 |
| Ets1     | 0.000429875 | 0.88584109 | 0.625 | 0.49  | 1 KO | Ets1     | 0.135 |
| Kpnb1    | 0.000444239 | 1.2252085  | 0.537 | 0.385 | 1 KO | Kpnb1    | 0.152 |
| Rgs1     | 0.000446085 | 1.65321909 | 0.15  | 0.049 | 1 KO | Rgs1     | 0.101 |
| C2       | 0.000446494 | 1.33111597 | 0.45  | 0.304 | 1 KO | C2       | 0.146 |
| Gm38037  | 0.000449636 | 2.88792578 | 0.05  | 0.006 | 1 KO | Gm38037  | 0.044 |
| Unc5b    | 0.000449636 | 2.11809583 | 0.05  | 0.006 | 1 KO | Unc5b    | 0.044 |
| St13     | 0.000455075 | 1.09621633 | 0.6   | 0.482 | 1 KO | St13     | 0.118 |
| Ctr9     | 0.000458251 | 2.71555352 | 0.288 | 0.157 | 1 KO | Ctr9     | 0.131 |
| Baz1b    | 0.000459858 | 2.11430859 | 0.375 | 0.236 | 1 KO | Baz1b    | 0.139 |
| Llph     | 0.000461652 | 0.90927073 | 0.562 | 0.396 | 1 KO | Llph     | 0.166 |
| Irx5     | 0.000476995 | 2.59807796 | 0.15  | 0.052 | 1 KO | Irx5     | 0.098 |
| Psma5    | 0.000477123 | 0.9890334  | 0.512 | 0.369 | 1 KO | Psma5    | 0.143 |
| Eif2s3x  | 0.000478102 | 1.49601063 | 0.45  | 0.309 | 1 KO | Eif2s3x  | 0.141 |
| Rbm45    | 0.00047958  | 1.62066481 | 0.112 | 0.032 | 1 KO | Rbm45    | 0.08  |
| Ssrp1    | 0.000483701 | 1.05263557 | 0.512 | 0.345 | 1 KO | Ssrp1    | 0.167 |

|         |             |            |       |       |      |         |       |
|---------|-------------|------------|-------|-------|------|---------|-------|
| Siva1   | 0.000488973 | 0.97169656 | 0.562 | 0.391 | 1 KO | Siva1   | 0.171 |
| Oas2    | 0.000494363 | 1.3674118  | 0.05  | 0.006 | 1 KO | Oas2    | 0.044 |
| Hsph1   | 0.000521153 | 2.31614266 | 0.275 | 0.147 | 1 KO | Hsph1   | 0.128 |
| Gm4841  | 0.000522024 | 4.78678914 | 0.038 | 0.003 | 1 KO | Gm4841  | 0.035 |
| C3      | 0.000537756 | 3.01985712 | 0.038 | 0.003 | 1 KO | C3      | 0.035 |
| Sez6l2  | 0.000545786 | 1.897079   | 0.038 | 0.003 | 1 KO | Sez6l2  | 0.035 |
| Pi16    | 0.000553928 | 1.80906674 | 0.038 | 0.003 | 1 KO | Pi16    | 0.035 |
| Kiz     | 0.000554213 | 3.59718563 | 0.112 | 0.033 | 1 KO | Kiz     | 0.079 |
| Myo5a   | 0.000559173 | 1.06401517 | 0.6   | 0.46  | 1 KO | Myo5a   | 0.14  |
| Gatad2a | 0.000617664 | 1.43937801 | 0.388 | 0.25  | 1 KO | Gatad2a | 0.138 |
| Hnrnpu  | 0.000639172 | 0.9202039  | 0.662 | 0.548 | 1 KO | Hnrnpu  | 0.114 |
| Tbl3    | 0.000659435 | 1.1201361  | 0.275 | 0.141 | 1 KO | Tbl3    | 0.134 |
| Nr4a1   | 0.000680359 | 2.43414069 | 0.3   | 0.177 | 1 KO | Nr4a1   | 0.123 |
| Tob2    | 0.000711658 | 1.79128154 | 0.35  | 0.214 | 1 KO | Tob2    | 0.136 |
| Pxk     | 0.000722611 | 2.15276977 | 0.062 | 0.011 | 1 KO | Pxk     | 0.051 |
| Cmpk2   | 0.000726758 | 1.99088508 | 0.075 | 0.016 | 1 KO | Cmpk2   | 0.059 |
| Ndufs1  | 0.000732143 | 1.53077289 | 0.462 | 0.338 | 1 KO | Ndufs1  | 0.124 |
| Cish    | 0.000736351 | 2.8567449  | 0.062 | 0.011 | 1 KO | Cish    | 0.051 |
| Ptprc   | 0.000739607 | 2.12060622 | 0.1   | 0.027 | 1 KO | Ptprc   | 0.073 |
| Csde1   | 0.000747818 | 0.83487668 | 0.625 | 0.475 | 1 KO | Csde1   | 0.15  |
| Ubfd1   | 0.000759465 | 2.05780892 | 0.288 | 0.155 | 1 KO | Ubfd1   | 0.133 |
| Cd83    | 0.000764563 | 2.78380567 | 0.062 | 0.011 | 1 KO | Cd83    | 0.051 |
| Psm1    | 0.000766934 | 1.1901592  | 0.475 | 0.349 | 1 KO | Psm1    | 0.126 |
| Tnpo3   | 0.000770648 | 1.48238697 | 0.462 | 0.345 | 1 KO | Tnpo3   | 0.117 |
| Mitd1   | 0.000786223 | 2.09568814 | 0.238 | 0.124 | 1 KO | Mitd1   | 0.114 |
| Chordc1 | 0.00079487  | 1.66920553 | 0.275 | 0.151 | 1 KO | Chordc1 | 0.124 |
| Blmh    | 0.000796843 | 1.53596817 | 0.388 | 0.252 | 1 KO | Blmh    | 0.136 |
| Kmt5a   | 0.000826241 | 1.70436321 | 0.375 | 0.249 | 1 KO | Kmt5a   | 0.126 |
| Smpdl3b | 0.000869827 | 2.95511678 | 0.088 | 0.022 | 1 KO | Smpdl3b | 0.066 |
| Ttc3    | 0.00087357  | 0.88950345 | 0.613 | 0.466 | 1 KO | Ttc3    | 0.147 |
| Casp12  | 0.000875099 | 2.11590922 | 0.15  | 0.055 | 1 KO | Casp12  | 0.095 |
| Abcf1   | 0.000879953 | 0.80832225 | 0.512 | 0.355 | 1 KO | Abcf1   | 0.157 |
| Sept11  | 0.000910647 | 1.76595962 | 0.4   | 0.268 | 1 KO | Sept11  | 0.132 |
| Nmi     | 0.000927577 | 1.69499311 | 0.275 | 0.151 | 1 KO | Nmi     | 0.124 |
| Crebrf  | 0.000927922 | 0.8827008  | 0.225 | 0.105 | 1 KO | Crebrf  | 0.12  |
| H2-DMb1 | 0.000944485 | 1.72807469 | 0.238 | 0.119 | 1 KO | H2-DMb1 | 0.119 |
| Sec61a1 | 0.000990559 | 1.22326262 | 0.562 | 0.468 | 1 KO | Sec61a1 | 0.094 |
| Ptms    | 0.000995936 | 0.85453148 | 0.6   | 0.477 | 1 KO | Ptms    | 0.123 |
| Ccnk    | 0.000996664 | 1.29566984 | 0.338 | 0.209 | 1 KO | Ccnk    | 0.129 |
| Zcchc14 | 0.001006836 | 1.71131633 | 0.212 | 0.1   | 1 KO | Zcchc14 | 0.112 |
| Dcun1d2 | 0.001016731 | 2.27026881 | 0.112 | 0.035 | 1 KO | Dcun1d2 | 0.077 |
| Mbtps1  | 0.001024784 | 1.62219423 | 0.338 | 0.203 | 1 KO | Mbtps1  | 0.135 |
| Nudt3   | 0.001030908 | 1.05859766 | 0.488 | 0.363 | 1 KO | Nudt3   | 0.125 |
| Foxp4   | 0.00107282  | 2.09752591 | 0.125 | 0.041 | 1 KO | Foxp4   | 0.084 |
| Gm16286 | 0.001084303 | 1.71486554 | 0.438 | 0.304 | 1 KO | Gm16286 | 0.134 |
| Fos     | 0.001128268 | 2.04957418 | 0.412 | 0.273 | 1 KO | Fos     | 0.139 |
| Nfkb1a  | 0.001136991 | 2.23066825 | 0.288 | 0.163 | 1 KO | Nfkb1a  | 0.125 |
| Senp6   | 0.001143924 | 1.28239119 | 0.462 | 0.336 | 1 KO | Senp6   | 0.126 |
| Mrfap1  | 0.00115357  | 0.74347814 | 0.738 | 0.555 | 1 KO | Mrfap1  | 0.183 |
| Esr1    | 0.001157734 | 1.17757501 | 0.1   | 0.029 | 1 KO | Esr1    | 0.071 |
| Ndufs2  | 0.001164288 | 0.6998775  | 0.625 | 0.482 | 1 KO | Ndufs2  | 0.143 |
| Mtmt2   | 0.001164982 | 1.19596649 | 0.475 | 0.374 | 1 KO | Mtmt2   | 0.101 |

|         |             |            |       |       |      |         |       |
|---------|-------------|------------|-------|-------|------|---------|-------|
| Tuba1b  | 0.001188703 | 0.96066757 | 0.713 | 0.607 | 1 KO | Tuba1b  | 0.106 |
| Vat1    | 0.001198377 | 0.79365419 | 0.662 | 0.526 | 1 KO | Vat1    | 0.136 |
| Mrpl52  | 0.001226468 | 0.78194618 | 0.65  | 0.526 | 1 KO | Mrpl52  | 0.124 |
| Ndufa3  | 0.001228085 | 0.94346554 | 0.625 | 0.531 | 1 KO | Ndufa3  | 0.094 |
| Akr1b3  | 0.00124538  | 0.99287484 | 0.537 | 0.407 | 1 KO | Akr1b3  | 0.13  |
| Gtf2h1  | 0.001270464 | 1.32365245 | 0.475 | 0.347 | 1 KO | Gtf2h1  | 0.128 |
| Cdk4    | 0.001273563 | 0.76641806 | 0.662 | 0.482 | 1 KO | Cdk4    | 0.18  |
| Glg1    | 0.001276179 | 1.7606273  | 0.4   | 0.285 | 1 KO | Glg1    | 0.115 |
| Mybbp1a | 0.001282289 | 1.48822682 | 0.4   | 0.271 | 1 KO | Mybbp1a | 0.129 |
| Usp15   | 0.001393739 | 1.28373628 | 0.325 | 0.201 | 1 KO | Usp15   | 0.124 |
| Ddx59   | 0.001395995 | 1.83083015 | 0.125 | 0.043 | 1 KO | Ddx59   | 0.082 |
| Nlrc5   | 0.001436158 | 1.44866836 | 0.225 | 0.111 | 1 KO | Nlrc5   | 0.114 |
| Pdcd6ip | 0.001440006 | 1.37566954 | 0.425 | 0.317 | 1 KO | Pdcd6ip | 0.108 |
| Fam120a | 0.001479656 | 1.25982353 | 0.512 | 0.398 | 1 KO | Fam120a | 0.114 |
| Eif3g   | 0.001485352 | 1.11204868 | 0.512 | 0.38  | 1 KO | Eif3g   | 0.132 |
| Ipo7    | 0.001509461 | 1.28066531 | 0.375 | 0.254 | 1 KO | Ipo7    | 0.121 |
| Dtx3l   | 0.001565546 | 2.40940976 | 0.138 | 0.052 | 1 KO | Dtx3l   | 0.086 |
| Uba52   | 0.001566193 | 0.96706744 | 0.55  | 0.468 | 1 KO | Uba52   | 0.082 |
| Nolc1   | 0.001586296 | 1.52896724 | 0.375 | 0.244 | 1 KO | Nolc1   | 0.131 |
| Scpep1  | 0.001636049 | 1.29627477 | 0.462 | 0.336 | 1 KO | Scpep1  | 0.126 |
| Suclg2  | 0.001649253 | 1.25725371 | 0.45  | 0.331 | 1 KO | Suclg2  | 0.119 |
| Gars    | 0.001664224 | 0.81209424 | 0.6   | 0.444 | 1 KO | Gars    | 0.156 |
| Rasa3   | 0.001676914 | 2.08848452 | 0.288 | 0.17  | 1 KO | Rasa3   | 0.118 |
| Pomgnt2 | 0.001720073 | 0.88841879 | 0.062 | 0.013 | 1 KO | Pomgnt2 | 0.049 |
| Ap2m1   | 0.001734089 | 0.99545096 | 0.537 | 0.396 | 1 KO | Ap2m1   | 0.141 |
| Calu    | 0.001751402 | 1.05426195 | 0.613 | 0.461 | 1 KO | Calu    | 0.152 |
| Kpna4   | 0.001818738 | 1.11031222 | 0.362 | 0.236 | 1 KO | Kpna4   | 0.126 |
| Serp1   | 0.001844763 | 1.12179484 | 0.525 | 0.388 | 1 KO | Serp1   | 0.137 |
| Psip1   | 0.001865615 | 2.23801564 | 0.375 | 0.261 | 1 KO | Psip1   | 0.114 |
| Mrpl19  | 0.001868022 | 1.28399035 | 0.388 | 0.268 | 1 KO | Mrpl19  | 0.12  |
| Ccser2  | 0.001913269 | 2.1476068  | 0.3   | 0.19  | 1 KO | Ccser2  | 0.11  |
| Ssb     | 0.001914648 | 0.82847912 | 0.588 | 0.447 | 1 KO | Ssb     | 0.141 |
| Dnaja1  | 0.001951317 | 0.88355508 | 0.575 | 0.447 | 1 KO | Dnaja1  | 0.128 |
| Bpnt1   | 0.002004022 | 1.32493715 | 0.425 | 0.296 | 1 KO | Bpnt1   | 0.129 |
| Tyr     | 0.002072677 | 1.13299392 | 0.613 | 0.45  | 1 KO | Tyr     | 0.163 |
| Ptges3  | 0.00208422  | 0.87659696 | 0.575 | 0.441 | 1 KO | Ptges3  | 0.134 |
| Zc3h7b  | 0.002107665 | 2.03456747 | 0.262 | 0.151 | 1 KO | Zc3h7b  | 0.111 |
| Ddx3x   | 0.002119313 | 1.01156362 | 0.537 | 0.412 | 1 KO | Ddx3x   | 0.125 |
| Azin1   | 0.002154582 | 1.39304459 | 0.388 | 0.266 | 1 KO | Azin1   | 0.122 |
| Pdia3   | 0.002170192 | 0.96072117 | 0.562 | 0.434 | 1 KO | Pdia3   | 0.128 |
| Prpf40a | 0.002189612 | 0.92965983 | 0.525 | 0.395 | 1 KO | Prpf40a | 0.13  |
| Eif4g1  | 0.00222924  | 0.8035974  | 0.6   | 0.477 | 1 KO | Eif4g1  | 0.123 |
| Tfrc    | 0.002300649 | 0.78538232 | 0.525 | 0.376 | 1 KO | Tfrc    | 0.149 |
| P2ry10  | 0.002332855 | 4.96563308 | 0.025 | 0.002 | 1 KO | P2ry10  | 0.023 |
| Xlr4c   | 0.002332855 | 4.28259359 | 0.025 | 0.002 | 1 KO | Xlr4c   | 0.023 |
| Ccr7    | 0.002332855 | 2.94373834 | 0.025 | 0.002 | 1 KO | Ccr7    | 0.023 |
| Rspo3   | 0.002332855 | 2.20331726 | 0.025 | 0.002 | 1 KO | Rspo3   | 0.023 |
| Muc1    | 0.002332855 | 1.96122138 | 0.025 | 0.002 | 1 KO | Muc1    | 0.023 |
| Lrp4    | 0.002332855 | 1.54544566 | 0.025 | 0.002 | 1 KO | Lrp4    | 0.023 |
| Cgn     | 0.002332855 | 1.35674401 | 0.025 | 0.002 | 1 KO | Cgn     | 0.023 |
| Dnph1   | 0.002363894 | 1.06227021 | 0.425 | 0.285 | 1 KO | Dnph1   | 0.14  |
| Dapl1   | 0.002373081 | 3.37851306 | 0.025 | 0.002 | 1 KO | Dapl1   | 0.023 |

|             |             |            |       |       |      |             |       |
|-------------|-------------|------------|-------|-------|------|-------------|-------|
| Mpp4        | 0.002373081 | 0.91286472 | 0.025 | 0.002 | 1 KO | Mpp4        | 0.023 |
| Ak2         | 0.002404755 | 1.08171109 | 0.488 | 0.357 | 1 KO | Ak2         | 0.131 |
| Metap2      | 0.002411707 | 0.89517894 | 0.537 | 0.41  | 1 KO | Metap2      | 0.127 |
| Olfr1167    | 0.002413941 | 1.13863175 | 0.025 | 0.002 | 1 KO | Olfr1167    | 0.023 |
| Igsf8       | 0.002452655 | 1.33916159 | 0.462 | 0.352 | 1 KO | Igsf8       | 0.11  |
| Entpd2      | 0.002455651 | 1.79765769 | 0.038 | 0.005 | 1 KO | Entpd2      | 0.033 |
| Plekhj1     | 0.002468074 | 0.88723454 | 0.438 | 0.307 | 1 KO | Plekhj1     | 0.131 |
| Clec10a     | 0.002485457 | 2.84168259 | 0.038 | 0.005 | 1 KO | Clec10a     | 0.033 |
| Polr1c      | 0.002541003 | 1.08162563 | 0.388 | 0.266 | 1 KO | Polr1c      | 0.122 |
| Brca1       | 0.002563877 | 1.60743877 | 0.275 | 0.163 | 1 KO | Brca1       | 0.112 |
| Adck2       | 0.002574739 | 1.61605364 | 0.125 | 0.046 | 1 KO | Adck2       | 0.079 |
| Gimap1      | 0.002576871 | 1.47166173 | 0.038 | 0.005 | 1 KO | Gimap1      | 0.033 |
| Plekhm1     | 0.002579065 | 1.47891062 | 0.175 | 0.079 | 1 KO | Plekhm1     | 0.096 |
| Rhpn1       | 0.002608018 | 1.72119877 | 0.038 | 0.005 | 1 KO | Rhpn1       | 0.033 |
| Hells       | 0.002706971 | 1.83520485 | 0.262 | 0.147 | 1 KO | Hells       | 0.115 |
| Hoxd13      | 0.002721966 | 2.36657366 | 0.088 | 0.025 | 1 KO | Hoxd13      | 0.063 |
| Rdx         | 0.002729114 | 1.09237623 | 0.475 | 0.349 | 1 KO | Rdx         | 0.126 |
| Bloc1s1     | 0.002759311 | 1.61728453 | 0.2   | 0.098 | 1 KO | Bloc1s1     | 0.102 |
| Ubl3        | 0.00276444  | 1.17723971 | 0.5   | 0.415 | 1 KO | Ubl3        | 0.085 |
| Ccl4        | 0.002783544 | 1.94953067 | 0.138 | 0.052 | 1 KO | Ccl4        | 0.086 |
| Rtcb        | 0.002791528 | 1.52228596 | 0.388 | 0.276 | 1 KO | Rtcb        | 0.112 |
| Smc3        | 0.002796563 | 1.62206274 | 0.375 | 0.257 | 1 KO | Smc3        | 0.118 |
| Usp25       | 0.002956359 | 1.82898617 | 0.312 | 0.204 | 1 KO | Usp25       | 0.108 |
| Ptpn11      | 0.003004949 | 1.93918631 | 0.362 | 0.244 | 1 KO | Ptpn11      | 0.118 |
| Aldh18a1    | 0.003055255 | 1.58457229 | 0.188 | 0.089 | 1 KO | Aldh18a1    | 0.099 |
| Hnrnpk      | 0.00312644  | 0.74152423 | 0.7   | 0.591 | 1 KO | Hnrnpk      | 0.109 |
| Nfia        | 0.003141594 | 1.37224506 | 0.362 | 0.246 | 1 KO | Nfia        | 0.116 |
| Lig1        | 0.003156515 | 1.52715368 | 0.325 | 0.204 | 1 KO | Lig1        | 0.121 |
| Mrps33      | 0.003234357 | 0.71323846 | 0.688 | 0.517 | 1 KO | Mrps33      | 0.171 |
| Scrib       | 0.003248247 | 1.62982508 | 0.288 | 0.171 | 1 KO | Scrib       | 0.117 |
| Gphn        | 0.003299226 | 1.13046273 | 0.2   | 0.1   | 1 KO | Gphn        | 0.1   |
| Appbp2      | 0.003468325 | 1.41893129 | 0.388 | 0.269 | 1 KO | Appbp2      | 0.119 |
| Ppp4r2      | 0.003528256 | 1.29659267 | 0.475 | 0.349 | 1 KO | Ppp4r2      | 0.126 |
| Pa2g4       | 0.00354219  | 0.76043832 | 0.575 | 0.445 | 1 KO | Pa2g4       | 0.13  |
| Kdm1a       | 0.003549386 | 1.4368378  | 0.35  | 0.239 | 1 KO | Kdm1a       | 0.111 |
| Psm3        | 0.003599692 | 0.78206123 | 0.488 | 0.353 | 1 KO | Psm3        | 0.135 |
| Rps12-ps3   | 0.003685846 | 1.05270849 | 0.15  | 0.063 | 1 KO | Rps12-ps3   | 0.087 |
| 4930432K21R | 0.00370467  | 2.15151496 | 0.05  | 0.01  | 1 KO | 4930432K21R | 0.04  |
| Smarcc1     | 0.003709189 | 1.01029298 | 0.475 | 0.36  | 1 KO | Smarcc1     | 0.115 |
| Tax1bp1     | 0.003710189 | 0.78971406 | 0.575 | 0.45  | 1 KO | Tax1bp1     | 0.125 |
| Cdt1        | 0.00374161  | 1.77639895 | 0.275 | 0.165 | 1 KO | Cdt1        | 0.11  |
| Cnn3        | 0.003750378 | 1.0029063  | 0.45  | 0.328 | 1 KO | Cnn3        | 0.122 |
| Atic        | 0.003791445 | 1.2212201  | 0.362 | 0.258 | 1 KO | Atic        | 0.104 |
| Ppp2ca      | 0.003817526 | 0.81299089 | 0.625 | 0.452 | 1 KO | Ppp2ca      | 0.173 |
| Nav2        | 0.003837418 | 1.56162804 | 0.3   | 0.187 | 1 KO | Nav2        | 0.113 |
| St3gal6     | 0.003860969 | 1.15783216 | 0.488 | 0.38  | 1 KO | St3gal6     | 0.108 |
| Clic4       | 0.003960876 | 1.56978066 | 0.4   | 0.285 | 1 KO | Clic4       | 0.115 |
| Ddx1        | 0.003998985 | 1.17289823 | 0.462 | 0.349 | 1 KO | Ddx1        | 0.113 |
| Csnk1d      | 0.004059748 | 1.4872641  | 0.388 | 0.276 | 1 KO | Csnk1d      | 0.112 |
| Dlst        | 0.004104298 | 1.36385739 | 0.488 | 0.387 | 1 KO | Dlst        | 0.101 |
| Lypla2      | 0.00414447  | 1.31222479 | 0.25  | 0.139 | 1 KO | Lypla2      | 0.111 |
| Pnn         | 0.004197194 | 0.85196923 | 0.462 | 0.334 | 1 KO | Pnn         | 0.128 |

|             |             |            |       |       |      |             |       |
|-------------|-------------|------------|-------|-------|------|-------------|-------|
| Epn2        | 0.004207079 | 2.06163248 | 0.275 | 0.17  | 1 KO | Epn2        | 0.105 |
| Oat         | 0.004228749 | 1.00322817 | 0.512 | 0.371 | 1 KO | Oat         | 0.141 |
| Fkbp4       | 0.004237594 | 0.85589375 | 0.6   | 0.493 | 1 KO | Fkbp4       | 0.107 |
| Exosc2      | 0.004282846 | 1.32540409 | 0.212 | 0.111 | 1 KO | Exosc2      | 0.101 |
| Dmwd        | 0.004296595 | 1.91963465 | 0.238 | 0.132 | 1 KO | Dmwd        | 0.106 |
| Msh6        | 0.004319629 | 1.8390545  | 0.188 | 0.094 | 1 KO | Msh6        | 0.094 |
| Kif5b       | 0.004336344 | 0.90998631 | 0.512 | 0.393 | 1 KO | Kif5b       | 0.119 |
| Ogdh        | 0.004462483 | 0.92566624 | 0.55  | 0.418 | 1 KO | Ogdh        | 0.132 |
| Phb         | 0.004470509 | 1.01927528 | 0.45  | 0.347 | 1 KO | Phb         | 0.103 |
| Gtpbp2      | 0.004510119 | 1.2962029  | 0.288 | 0.173 | 1 KO | Gtpbp2      | 0.115 |
| Cacybp      | 0.004528588 | 1.03645886 | 0.462 | 0.357 | 1 KO | Cacybp      | 0.105 |
| Rpl27-ps3   | 0.004834387 | 1.19005036 | 0.3   | 0.198 | 1 KO | Rpl27-ps3   | 0.102 |
| Hnrnph1     | 0.004892943 | 1.40646837 | 0.55  | 0.452 | 1 KO | Hnrnph1     | 0.098 |
| Bola2       | 0.005010173 | 0.7673126  | 0.637 | 0.542 | 1 KO | Bola2       | 0.095 |
| N4bp1       | 0.005039997 | 1.91054316 | 0.212 | 0.113 | 1 KO | N4bp1       | 0.099 |
| Myh10       | 0.005047001 | 4.49992863 | 0.013 | 0     | 1 KO | Myh10       | 0.013 |
| Myb         | 0.005047001 | 4.40335569 | 0.013 | 0     | 1 KO | Myb         | 0.013 |
| Fam84a      | 0.005047001 | 3.83915682 | 0.013 | 0     | 1 KO | Fam84a      | 0.013 |
| Ren1        | 0.005047001 | 3.83630194 | 0.013 | 0     | 1 KO | Ren1        | 0.013 |
| Zfp182      | 0.005047001 | 3.83630194 | 0.013 | 0     | 1 KO | Zfp182      | 0.013 |
| Eln         | 0.005047001 | 3.82494701 | 0.013 | 0     | 1 KO | Eln         | 0.013 |
| Egfl6       | 0.005047001 | 3.5668997  | 0.013 | 0     | 1 KO | Egfl6       | 0.013 |
| Mybpc1      | 0.005047001 | 3.5668997  | 0.013 | 0     | 1 KO | Mybpc1      | 0.013 |
| 6030419C18R | 0.005047001 | 3.5668997  | 0.013 | 0     | 1 KO | 6030419C18R | 0.013 |
| Jrk         | 0.005047001 | 3.5668997  | 0.013 | 0     | 1 KO | Jrk         | 0.013 |
| Strip2      | 0.005047001 | 3.55605484 | 0.013 | 0     | 1 KO | Strip2      | 0.013 |
| Myrf        | 0.005047001 | 3.50214962 | 0.013 | 0     | 1 KO | Myrf        | 0.013 |
| Cabp7       | 0.005047001 | 3.46153192 | 0.013 | 0     | 1 KO | Cabp7       | 0.013 |
| Dio2        | 0.005047001 | 3.23969528 | 0.013 | 0     | 1 KO | Dio2        | 0.013 |
| Ly6g6e      | 0.005047001 | 3.08720828 | 0.013 | 0     | 1 KO | Ly6g6e      | 0.013 |
| Serpinf2    | 0.005047001 | 2.92794558 | 0.013 | 0     | 1 KO | Serpinf2    | 0.013 |
| Spib        | 0.005047001 | 2.86609509 | 0.013 | 0     | 1 KO | Spib        | 0.013 |
| Kcnc3       | 0.005047001 | 2.86609509 | 0.013 | 0     | 1 KO | Kcnc3       | 0.013 |
| Rhbdl3      | 0.005047001 | 2.86609509 | 0.013 | 0     | 1 KO | Rhbdl3      | 0.013 |
| Has1        | 0.005047001 | 2.86609509 | 0.013 | 0     | 1 KO | Has1        | 0.013 |
| Pdgfrl      | 0.005047001 | 2.75483834 | 0.013 | 0     | 1 KO | Pdgfrl      | 0.013 |
| Ntng1       | 0.005047001 | 2.6737764  | 0.013 | 0     | 1 KO | Ntng1       | 0.013 |
| Erich3      | 0.005047001 | 2.6737764  | 0.013 | 0     | 1 KO | Erich3      | 0.013 |
| Dpysl5      | 0.005047001 | 2.6737764  | 0.013 | 0     | 1 KO | Dpysl5      | 0.013 |
| Sbk3        | 0.005047001 | 2.6737764  | 0.013 | 0     | 1 KO | Sbk3        | 0.013 |
| Fam161b     | 0.005047001 | 2.6737764  | 0.013 | 0     | 1 KO | Fam161b     | 0.013 |
| Gdnf        | 0.005047001 | 2.6737764  | 0.013 | 0     | 1 KO | Gdnf        | 0.013 |
| Sema5a      | 0.005047001 | 2.6737764  | 0.013 | 0     | 1 KO | Sema5a      | 0.013 |
| Rorb        | 0.005047001 | 2.6737764  | 0.013 | 0     | 1 KO | Rorb        | 0.013 |
| Ccdc160     | 0.005047001 | 2.63219078 | 0.013 | 0     | 1 KO | Ccdc160     | 0.013 |
| Gm11915     | 0.005047001 | 2.63219078 | 0.013 | 0     | 1 KO | Gm11915     | 0.013 |
| Gm48898     | 0.005047001 | 2.63219078 | 0.013 | 0     | 1 KO | Gm48898     | 0.013 |
| BC051077    | 0.005047001 | 2.61620779 | 0.013 | 0     | 1 KO | BC051077    | 0.013 |
| Grik4       | 0.005047001 | 2.50809194 | 0.013 | 0     | 1 KO | Grik4       | 0.013 |
| Zfp711      | 0.005047001 | 2.4728119  | 0.013 | 0     | 1 KO | Zfp711      | 0.013 |
| 2010308F09R | 0.005047001 | 2.43873155 | 0.013 | 0     | 1 KO | 2010308F09R | 0.013 |
| Meiob       | 0.005047001 | 2.01194082 | 0.013 | 0     | 1 KO | Meiob       | 0.013 |

|             |             |            |       |   |      |             |       |
|-------------|-------------|------------|-------|---|------|-------------|-------|
| Gm16755     | 0.005047001 | 1.99421972 | 0.013 | 0 | 1 KO | Gm16755     | 0.013 |
| Gm40932     | 0.005047001 | 1.99421972 | 0.013 | 0 | 1 KO | Gm40932     | 0.013 |
| 1810041L15R | 0.005047001 | 1.99421972 | 0.013 | 0 | 1 KO | 1810041L15R | 0.013 |
| Gm41231     | 0.005047001 | 1.98907598 | 0.013 | 0 | 1 KO | Gm41231     | 0.013 |
| Itln1       | 0.005047001 | 1.95637197 | 0.013 | 0 | 1 KO | Itln1       | 0.013 |
| Klre1       | 0.005047001 | 1.95637197 | 0.013 | 0 | 1 KO | Klre1       | 0.013 |
| Gm32926     | 0.005047001 | 1.95637197 | 0.013 | 0 | 1 KO | Gm32926     | 0.013 |
| Gm47414     | 0.005047001 | 1.95637197 | 0.013 | 0 | 1 KO | Gm47414     | 0.013 |
| Dusp13      | 0.005047001 | 1.93492503 | 0.013 | 0 | 1 KO | Dusp13      | 0.013 |
| Gm38431     | 0.005047001 | 1.93492503 | 0.013 | 0 | 1 KO | Gm38431     | 0.013 |
| Tnxb        | 0.005047001 | 1.92368942 | 0.013 | 0 | 1 KO | Tnxb        | 0.013 |
| Aqp8        | 0.005047001 | 1.74209926 | 0.013 | 0 | 1 KO | Aqp8        | 0.013 |
| Cfap70      | 0.005047001 | 1.74209926 | 0.013 | 0 | 1 KO | Cfap70      | 0.013 |
| Fdx1l       | 0.005047001 | 1.73812446 | 0.013 | 0 | 1 KO | Fdx1l       | 0.013 |
| Tmem121b    | 0.005047001 | 1.71176955 | 0.013 | 0 | 1 KO | Tmem121b    | 0.013 |
| Gm26873     | 0.005047001 | 1.71176955 | 0.013 | 0 | 1 KO | Gm26873     | 0.013 |
| A230077H06F | 0.005047001 | 1.70000038 | 0.013 | 0 | 1 KO | A230077H06F | 0.013 |
| Gm48362     | 0.005047001 | 1.70000038 | 0.013 | 0 | 1 KO | Gm48362     | 0.013 |
| Gm47270     | 0.005047001 | 1.70000038 | 0.013 | 0 | 1 KO | Gm47270     | 0.013 |
| Adora2b     | 0.005047001 | 1.70000038 | 0.013 | 0 | 1 KO | Adora2b     | 0.013 |
| Cpne5       | 0.005047001 | 1.70000038 | 0.013 | 0 | 1 KO | Cpne5       | 0.013 |
| Tmem151b    | 0.005047001 | 1.70000038 | 0.013 | 0 | 1 KO | Tmem151b    | 0.013 |
| Tnfrsf14    | 0.005047001 | 1.65196429 | 0.013 | 0 | 1 KO | Tnfrsf14    | 0.013 |
| Dlx3        | 0.005047001 | 1.65196429 | 0.013 | 0 | 1 KO | Dlx3        | 0.013 |
| 1110032F04R | 0.005047001 | 1.64424871 | 0.013 | 0 | 1 KO | 1110032F04R | 0.013 |
| Gm46440     | 0.005047001 | 1.58373245 | 0.013 | 0 | 1 KO | Gm46440     | 0.013 |
| Majin       | 0.005047001 | 1.58373245 | 0.013 | 0 | 1 KO | Majin       | 0.013 |
| Gm15298     | 0.005047001 | 1.5011574  | 0.013 | 0 | 1 KO | Gm15298     | 0.013 |
| 1500035N22F | 0.005047001 | 1.5011574  | 0.013 | 0 | 1 KO | 1500035N22F | 0.013 |
| Tex52       | 0.005047001 | 1.5011574  | 0.013 | 0 | 1 KO | Tex52       | 0.013 |
| Slc17a6     | 0.005047001 | 1.5011574  | 0.013 | 0 | 1 KO | Slc17a6     | 0.013 |
| Cidec       | 0.005047001 | 1.49938325 | 0.013 | 0 | 1 KO | Cidec       | 0.013 |
| Kcnt1       | 0.005047001 | 1.4780473  | 0.013 | 0 | 1 KO | Kcnt1       | 0.013 |
| Gm11551     | 0.005047001 | 1.4780473  | 0.013 | 0 | 1 KO | Gm11551     | 0.013 |
| Abi3bp      | 0.005047001 | 1.4780473  | 0.013 | 0 | 1 KO | Abi3bp      | 0.013 |
| Runx2os1    | 0.005047001 | 1.44378767 | 0.013 | 0 | 1 KO | Runx2os1    | 0.013 |
| Plcd4       | 0.005047001 | 1.41024608 | 0.013 | 0 | 1 KO | Plcd4       | 0.013 |
| 2700068H02R | 0.005047001 | 1.41024608 | 0.013 | 0 | 1 KO | 2700068H02R | 0.013 |
| Htr7        | 0.005047001 | 1.41024608 | 0.013 | 0 | 1 KO | Htr7        | 0.013 |
| Slc6a20a    | 0.005047001 | 1.3740385  | 0.013 | 0 | 1 KO | Slc6a20a    | 0.013 |
| Fam19a3     | 0.005047001 | 1.32938246 | 0.013 | 0 | 1 KO | Fam19a3     | 0.013 |
| Gm15859     | 0.005047001 | 1.26559155 | 0.013 | 0 | 1 KO | Gm15859     | 0.013 |
| Slc9a4      | 0.005047001 | 1.24025193 | 0.013 | 0 | 1 KO | Slc9a4      | 0.013 |
| Car3        | 0.005047001 | 1.24025193 | 0.013 | 0 | 1 KO | Car3        | 0.013 |
| Xlr4b       | 0.005047001 | 1.23654577 | 0.013 | 0 | 1 KO | Xlr4b       | 0.013 |
| Adra1b      | 0.005047001 | 1.23654577 | 0.013 | 0 | 1 KO | Adra1b      | 0.013 |
| Gm11707     | 0.005047001 | 1.23654577 | 0.013 | 0 | 1 KO | Gm11707     | 0.013 |
| Gprc5c      | 0.005047001 | 1.23654577 | 0.013 | 0 | 1 KO | Gprc5c      | 0.013 |
| Rslcan18    | 0.005047001 | 1.23654577 | 0.013 | 0 | 1 KO | Rslcan18    | 0.013 |
| Gm13874     | 0.005047001 | 1.21722743 | 0.013 | 0 | 1 KO | Gm13874     | 0.013 |
| Tceal1      | 0.005047001 | 1.21722743 | 0.013 | 0 | 1 KO | Tceal1      | 0.013 |
| Ccdc142     | 0.005047001 | 1.21722743 | 0.013 | 0 | 1 KO | Ccdc142     | 0.013 |

|             |             |            |       |   |      |             |       |
|-------------|-------------|------------|-------|---|------|-------------|-------|
| Gm26888     | 0.005047001 | 1.21722743 | 0.013 | 0 | 1 KO | Gm26888     | 0.013 |
| D430001F17R | 0.005047001 | 1.21722743 | 0.013 | 0 | 1 KO | D430001F17R | 0.013 |
| Pcdhgb6     | 0.005047001 | 1.21722743 | 0.013 | 0 | 1 KO | Pcdhgb6     | 0.013 |
| Prg2        | 0.005047001 | 1.16386687 | 0.013 | 0 | 1 KO | Prg2        | 0.013 |
| Platr15     | 0.005047001 | 1.16386687 | 0.013 | 0 | 1 KO | Platr15     | 0.013 |
| Shh         | 0.005047001 | 1.16386687 | 0.013 | 0 | 1 KO | Shh         | 0.013 |
| Wnt5a       | 0.005047001 | 1.16386687 | 0.013 | 0 | 1 KO | Wnt5a       | 0.013 |
| Gm10721     | 0.005047001 | 1.16386687 | 0.013 | 0 | 1 KO | Gm10721     | 0.013 |
| Il5         | 0.005047001 | 1.16386687 | 0.013 | 0 | 1 KO | Il5         | 0.013 |
| Kcnj16      | 0.005047001 | 1.16386687 | 0.013 | 0 | 1 KO | Kcnj16      | 0.013 |
| Gm15718     | 0.005047001 | 1.08753922 | 0.013 | 0 | 1 KO | Gm15718     | 0.013 |
| Podnl1      | 0.005047001 | 1.08753922 | 0.013 | 0 | 1 KO | Podnl1      | 0.013 |
| Grb7        | 0.005047001 | 1.08753922 | 0.013 | 0 | 1 KO | Grb7        | 0.013 |
| Slc23a3     | 0.005047001 | 0.99896238 | 0.013 | 0 | 1 KO | Slc23a3     | 0.013 |
| Sertad4     | 0.005047001 | 0.99896238 | 0.013 | 0 | 1 KO | Sertad4     | 0.013 |
| Zfp14       | 0.005047001 | 0.99896238 | 0.013 | 0 | 1 KO | Zfp14       | 0.013 |
| Igflr1      | 0.005047001 | 0.99896238 | 0.013 | 0 | 1 KO | Igflr1      | 0.013 |
| Lgr5        | 0.005047001 | 0.99896238 | 0.013 | 0 | 1 KO | Lgr5        | 0.013 |
| Spata31d1a  | 0.005047001 | 0.99896238 | 0.013 | 0 | 1 KO | Spata31d1a  | 0.013 |
| Gm2093      | 0.005047001 | 0.99896238 | 0.013 | 0 | 1 KO | Gm2093      | 0.013 |
| Peli3       | 0.005047001 | 0.99896238 | 0.013 | 0 | 1 KO | Peli3       | 0.013 |
| Gm13030     | 0.005047001 | 0.97117033 | 0.013 | 0 | 1 KO | Gm13030     | 0.013 |
| Klrb1c      | 0.005047001 | 0.97117033 | 0.013 | 0 | 1 KO | Klrb1c      | 0.013 |
| Barx2       | 0.005047001 | 0.97117033 | 0.013 | 0 | 1 KO | Barx2       | 0.013 |
| Gm32184     | 0.005047001 | 0.97117033 | 0.013 | 0 | 1 KO | Gm32184     | 0.013 |
| AC158554.1  | 0.005047001 | 0.97117033 | 0.013 | 0 | 1 KO | AC158554.1  | 0.013 |
| Gm44170     | 0.005047001 | 0.95589227 | 0.013 | 0 | 1 KO | Gm44170     | 0.013 |
| Gm14302     | 0.005047001 | 0.94663243 | 0.013 | 0 | 1 KO | Gm14302     | 0.013 |
| 4930519L02R | 0.005047001 | 0.94663243 | 0.013 | 0 | 1 KO | 4930519L02R | 0.013 |
| Acot11      | 0.005047001 | 0.94663243 | 0.013 | 0 | 1 KO | Acot11      | 0.013 |
| Plekhg4     | 0.005047001 | 0.94663243 | 0.013 | 0 | 1 KO | Plekhg4     | 0.013 |
| Dlk1        | 0.005047001 | 0.94663243 | 0.013 | 0 | 1 KO | Dlk1        | 0.013 |
| D830024N08F | 0.005047001 | 0.93549141 | 0.013 | 0 | 1 KO | D830024N08F | 0.013 |
| Gm36757     | 0.005047001 | 0.93549141 | 0.013 | 0 | 1 KO | Gm36757     | 0.013 |
| Olfr129     | 0.005047001 | 0.93549141 | 0.013 | 0 | 1 KO | Olfr129     | 0.013 |
| Fyb2        | 0.005047001 | 0.93029517 | 0.013 | 0 | 1 KO | Fyb2        | 0.013 |
| Fut1        | 0.005047001 | 0.91688656 | 0.013 | 0 | 1 KO | Fut1        | 0.013 |
| Kiss1r      | 0.005047001 | 0.91688656 | 0.013 | 0 | 1 KO | Kiss1r      | 0.013 |
| Gm48657     | 0.005047001 | 0.91688656 | 0.013 | 0 | 1 KO | Gm48657     | 0.013 |
| Gm11992     | 0.005047001 | 0.91688656 | 0.013 | 0 | 1 KO | Gm11992     | 0.013 |
| Gh          | 0.005047001 | 0.91688656 | 0.013 | 0 | 1 KO | Gh          | 0.013 |
| Npw         | 0.005047001 | 0.91688656 | 0.013 | 0 | 1 KO | Npw         | 0.013 |
| Gm26580     | 0.005047001 | 0.83431623 | 0.013 | 0 | 1 KO | Gm26580     | 0.013 |
| Cks1brt     | 0.005047001 | 0.83431623 | 0.013 | 0 | 1 KO | Cks1brt     | 0.013 |
| Gm26822     | 0.005047001 | 0.83431623 | 0.013 | 0 | 1 KO | Gm26822     | 0.013 |
| Gm15638     | 0.005047001 | 0.83431623 | 0.013 | 0 | 1 KO | Gm15638     | 0.013 |
| Gm38335     | 0.005047001 | 0.82828921 | 0.013 | 0 | 1 KO | Gm38335     | 0.013 |
| Krt28       | 0.005047001 | 0.79582802 | 0.013 | 0 | 1 KO | Krt28       | 0.013 |
| Abcb1a      | 0.005047001 | 0.76734026 | 0.013 | 0 | 1 KO | Abcb1a      | 0.013 |
| Gm45345     | 0.005047001 | 0.76734026 | 0.013 | 0 | 1 KO | Gm45345     | 0.013 |
| Cdh15       | 0.005047001 | 0.76734026 | 0.013 | 0 | 1 KO | Cdh15       | 0.013 |
| Mefv        | 0.005047001 | 0.76734026 | 0.013 | 0 | 1 KO | Mefv        | 0.013 |

|              |             |            |       |       |      |              |       |
|--------------|-------------|------------|-------|-------|------|--------------|-------|
| Pde6a        | 0.005047001 | 0.76734026 | 0.013 | 0     | 1 KO | Pde6a        | 0.013 |
| Tmem151a     | 0.005047001 | 0.76734026 | 0.013 | 0     | 1 KO | Tmem151a     | 0.013 |
| Gm16092      | 0.005047001 | 0.75099073 | 0.013 | 0     | 1 KO | Gm16092      | 0.013 |
| Gm13056      | 0.005047001 | 0.75099073 | 0.013 | 0     | 1 KO | Gm13056      | 0.013 |
| 4930438A08R  | 0.005047001 | 0.75099073 | 0.013 | 0     | 1 KO | 4930438A08R  | 0.013 |
| Pkhd11l      | 0.005047001 | 0.75099073 | 0.013 | 0     | 1 KO | Pkhd11l      | 0.013 |
| AC110166.1   | 0.005047001 | 0.75099073 | 0.013 | 0     | 1 KO | AC110166.1   | 0.013 |
| Nr5a1        | 0.005047001 | 0.742236   | 0.013 | 0     | 1 KO | Nr5a1        | 0.013 |
| 1700028J19Ri | 0.005047001 | 0.742236   | 0.013 | 0     | 1 KO | 1700028J19Ri | 0.013 |
| Foxj1        | 0.005047001 | 0.742236   | 0.013 | 0     | 1 KO | Foxj1        | 0.013 |
| Lyar         | 0.005162913 | 1.11605509 | 0.362 | 0.249 | 1 KO | Lyar         | 0.113 |
| Ubr4         | 0.005238523 | 1.09957637 | 0.362 | 0.247 | 1 KO | Ubr4         | 0.115 |
| Bhlhe41      | 0.005354524 | 0.95685765 | 0.512 | 0.387 | 1 KO | Bhlhe41      | 0.125 |
| Rrm1         | 0.005588034 | 1.37237698 | 0.388 | 0.285 | 1 KO | Rrm1         | 0.103 |
| Pdia6        | 0.005732774 | 0.8588829  | 0.575 | 0.445 | 1 KO | Pdia6        | 0.13  |
| Supt16       | 0.005776407 | 1.50457663 | 0.362 | 0.266 | 1 KO | Supt16       | 0.096 |
| Zmiz2        | 0.005778326 | 1.49514728 | 0.3   | 0.197 | 1 KO | Zmiz2        | 0.103 |
| Sfr1         | 0.00577845  | 1.04863197 | 0.438 | 0.342 | 1 KO | Sfr1         | 0.096 |
| Pdap1        | 0.005875342 | 0.92173297 | 0.512 | 0.434 | 1 KO | Pdap1        | 0.078 |
| Zmynd11      | 0.0060386   | 1.62937083 | 0.362 | 0.265 | 1 KO | Zmynd11      | 0.097 |
| Serpinb9     | 0.006174204 | 1.03493471 | 0.112 | 0.043 | 1 KO | Serpinb9     | 0.069 |
| Homez        | 0.006182214 | 1.60457614 | 0.088 | 0.029 | 1 KO | Homez        | 0.059 |
| Trim21       | 0.006182214 | 1.49251956 | 0.088 | 0.029 | 1 KO | Trim21       | 0.059 |
| Ldb1         | 0.006230142 | 1.12605686 | 0.35  | 0.231 | 1 KO | Ldb1         | 0.119 |
| Bap1         | 0.006273668 | 2.03814615 | 0.2   | 0.106 | 1 KO | Bap1         | 0.094 |
| Grcc10       | 0.006306381 | 0.99269989 | 0.362 | 0.255 | 1 KO | Grcc10       | 0.107 |
| Josd1        | 0.006313727 | 1.25089427 | 0.225 | 0.124 | 1 KO | Josd1        | 0.101 |
| Eefsec       | 0.006329233 | 1.43035743 | 0.388 | 0.281 | 1 KO | Eefsec       | 0.107 |
| Dnajc7       | 0.006426005 | 0.96960006 | 0.462 | 0.347 | 1 KO | Dnajc7       | 0.115 |
| Wdr77        | 0.006548533 | 2.05162641 | 0.325 | 0.233 | 1 KO | Wdr77        | 0.092 |
| Sae1         | 0.00664079  | 0.9205274  | 0.425 | 0.303 | 1 KO | Sae1         | 0.122 |
| Noc2l        | 0.006645048 | 1.21691886 | 0.35  | 0.247 | 1 KO | Noc2l        | 0.103 |
| Snw1         | 0.006748602 | 1.24978549 | 0.412 | 0.312 | 1 KO | Snw1         | 0.1   |
| Cxcl10       | 0.006750153 | 2.16180131 | 0.25  | 0.151 | 1 KO | Cxcl10       | 0.099 |
| Fam98b       | 0.007020384 | 1.80161216 | 0.262 | 0.162 | 1 KO | Fam98b       | 0.1   |
| Stat3        | 0.00723148  | 0.99727744 | 0.425 | 0.322 | 1 KO | Stat3        | 0.103 |
| Parp11       | 0.007243627 | 1.61539562 | 0.188 | 0.098 | 1 KO | Parp11       | 0.09  |
| Cse1l        | 0.007318697 | 0.98004271 | 0.325 | 0.209 | 1 KO | Cse1l        | 0.116 |
| Acsl3        | 0.007326426 | 1.56474182 | 0.362 | 0.276 | 1 KO | Acsl3        | 0.086 |
| Txnrd1       | 0.007347223 | 1.33115852 | 0.412 | 0.315 | 1 KO | Txnrd1       | 0.097 |
| Eif3m        | 0.007453314 | 0.72615677 | 0.625 | 0.477 | 1 KO | Eif3m        | 0.148 |
| BC055324     | 0.007569083 | 2.31579317 | 0.15  | 0.071 | 1 KO | BC055324     | 0.079 |
| G3bp1        | 0.007600066 | 0.98827371 | 0.562 | 0.439 | 1 KO | G3bp1        | 0.123 |
| Krt5         | 0.007602773 | 3.99223588 | 0.038 | 0.006 | 1 KO | Krt5         | 0.032 |
| Stpg1        | 0.007604236 | 1.40049765 | 0.05  | 0.011 | 1 KO | Stpg1        | 0.039 |
| Ammecr1l     | 0.007689265 | 1.34500162 | 0.2   | 0.111 | 1 KO | Ammecr1l     | 0.089 |
| Gbp6         | 0.007727518 | 1.83310769 | 0.05  | 0.011 | 1 KO | Gbp6         | 0.039 |
| Sh2d2a       | 0.007789828 | 2.20473839 | 0.05  | 0.011 | 1 KO | Sh2d2a       | 0.039 |
| Nek9         | 0.007795344 | 1.49641901 | 0.35  | 0.246 | 1 KO | Nek9         | 0.104 |
| Itgal        | 0.007835359 | 2.0221099  | 0.038 | 0.006 | 1 KO | Itgal        | 0.032 |
| Mgat4b       | 0.007916504 | 0.96670459 | 0.613 | 0.501 | 1 KO | Mgat4b       | 0.112 |
| Zfp503       | 0.007993938 | 1.65931118 | 0.038 | 0.006 | 1 KO | Zfp503       | 0.032 |

|           |             |            |       |       |      |           |       |
|-----------|-------------|------------|-------|-------|------|-----------|-------|
| Tnk2      | 0.008284234 | 0.85733326 | 0.275 | 0.173 | 1 KO | Tnk2      | 0.102 |
| Eloc      | 0.008604659 | 0.72517699 | 0.613 | 0.463 | 1 KO | Eloc      | 0.15  |
| Phf14     | 0.008683971 | 1.20491645 | 0.45  | 0.363 | 1 KO | Phf14     | 0.087 |
| Ier3ip1   | 0.008743852 | 1.06177797 | 0.45  | 0.353 | 1 KO | Ier3ip1   | 0.097 |
| Zfp809    | 0.008745606 | 1.4284429  | 0.088 | 0.03  | 1 KO | Zfp809    | 0.058 |
| Mknk1     | 0.008763558 | 1.88347176 | 0.1   | 0.038 | 1 KO | Mknk1     | 0.062 |
| Arhgef10l | 0.008773934 | 3.21243176 | 0.138 | 0.063 | 1 KO | Arhgef10l | 0.075 |
| Ppt2      | 0.008856403 | 1.33428593 | 0.462 | 0.371 | 1 KO | Ppt2      | 0.091 |
| Stag2     | 0.008916508 | 1.24013493 | 0.325 | 0.225 | 1 KO | Stag2     | 0.1   |
| Rgs2      | 0.008972508 | 2.07259615 | 0.1   | 0.038 | 1 KO | Rgs2      | 0.062 |
| Tram1     | 0.009049709 | 1.01833411 | 0.475 | 0.379 | 1 KO | Tram1     | 0.096 |
| Car14     | 0.009085339 | 0.89649998 | 0.512 | 0.418 | 1 KO | Car14     | 0.094 |
| Cox20     | 0.009116347 | 1.01239817 | 0.35  | 0.254 | 1 KO | Cox20     | 0.096 |
| Hikeshi   | 0.009162919 | 1.10049493 | 0.288 | 0.187 | 1 KO | Hikeshi   | 0.101 |
| Mcm6      | 0.009207212 | 0.91753724 | 0.35  | 0.227 | 1 KO | Mcm6      | 0.123 |
| Puf60     | 0.009255464 | 1.16353718 | 0.462 | 0.352 | 1 KO | Puf60     | 0.11  |
| Clasp2    | 0.009385129 | 1.60994817 | 0.225 | 0.133 | 1 KO | Clasp2    | 0.092 |
| Onecut2   | 0.009415373 | 1.83503259 | 0.062 | 0.017 | 1 KO | Onecut2   | 0.045 |
| H2-T22    | 0.009453103 | 1.07008081 | 0.275 | 0.177 | 1 KO | H2-T22    | 0.098 |
| Etf1      | 0.009478321 | 0.97793936 | 0.438 | 0.33  | 1 KO | Etf1      | 0.108 |
| Srek1ip1  | 0.009547891 | 1.72002283 | 0.25  | 0.16  | 1 KO | Srek1ip1  | 0.09  |
| Dhx37     | 0.00961337  | 2.32003694 | 0.125 | 0.054 | 1 KO | Dhx37     | 0.071 |
| Ftsj3     | 0.009664521 | 1.83888762 | 0.312 | 0.216 | 1 KO | Ftsj3     | 0.096 |
| Psm2      | 0.009821575 | 0.99143385 | 0.512 | 0.401 | 1 KO | Psm2      | 0.111 |
| Ezr       | 0.009839375 | 1.55613938 | 0.388 | 0.285 | 1 KO | Ezr       | 0.103 |
| Hnrnp1    | 0.00991575  | 0.77185154 | 0.525 | 0.436 | 1 KO | Hnrnp1    | 0.089 |
| Shc4      | 0.009997108 | 0.8862234  | 0.462 | 0.342 | 1 KO | Shc4      | 0.12  |
