# Supplementary material
Source: PubMed Central journal article supplement (PMC8940682)
Supplement: NIHMS1773905-supplement-24.pdf [file NIHMS1773905-supplement-24.pdf]

**Supplemental Table 12. Clinical characteristics of melanoma patients treated with anti-PD-1 with or without anti-CTLA-4**

| <b>Clinical Characteristic</b>              | <b>Number (out of 60 total patients)</b> |
|---------------------------------------------|------------------------------------------|
| <b>Age</b>                                  |                                          |
| Median                                      | 65.5, range 21-91                        |
| <b>Sex</b>                                  |                                          |
| Female                                      | 26 (43%)                                 |
| <b>Race</b>                                 |                                          |
| White                                       | 55 (91%)                                 |
| <b>Treatment regimen</b>                    |                                          |
| Anti-PD-1 monotherapy                       | 35 (58%)                                 |
| <b>Tumor mutation</b>                       |                                          |
| BRAF                                        | 19 (32%)                                 |
| NRAS                                        | 9 (15%)                                  |
| c-kit                                       | 3 (5%)                                   |
| WT for BRAF, NRAS and c-Kit                 | 29 (48%)                                 |
| <b>Baseline serum lactate dehydrogenase</b> |                                          |
| Elevated                                    | 10 (16%)                                 |
| <b>Type of melanoma</b>                     |                                          |
| Cutaneous                                   | 49 (82%)                                 |
| Mucosal                                     | 7 (11%)                                  |
| Unknown                                     | 4 (7%)                                   |
| <b>M Stage</b>                              |                                          |
| M1a                                         | 14 (23%)                                 |
| M1b                                         | 22 (37%)                                 |
| M1c                                         | 14 (23%)                                 |
| M1d                                         | 7 (11%)                                  |
| Unknown                                     | 4 (6%)                                   |
| <b>Response to immunotherapy</b>            |                                          |
| Complete Response (CR)                      | 13 (22%)                                 |
| Partial Response (PR)                       | 16 (27%)                                 |
| Stable Disease (SD)                         | 9 (15%)                                  |
| Progressive Disease (PD)                    | 22 (37%)                                 |

**Supplemental Table 13. Multivariable analysis of tumor RNLS levels and association with overall survival**

| <b>Variable</b>               | <b>Hazard ratio<br/>(95%CI)</b> | <b>P value</b> |
|-------------------------------|---------------------------------|----------------|
| RNLS (High/Low)               | 2.77 (1.34-5.92)                | 0.0054         |
| Age (older/younger>)          | 1.68(0.82-3.5)                  | 0.14           |
| Gender (female/male)          | 1.05(0.51-2.1)                  | 0.87           |
| Treatment (mono/dual therapy) | 1.77(0.88-3.66)                 | 0.1            |
| LDH (elevated/normal)         | 5.29(1.98-13.98)                | 0.0012         |
| M stage (M1a+M1b/M1c+M1d)     | 0.93(0.43-2.07)                 | 1.06           |
| BRAF (mutation/(WT)           | 0.64 (0.26-1.42)                | 0.28           |
